# Supplementary material for: Integrated Metabolomics and Proteomics Dynamics of Serum Samples Reveals Dietary Zeolite Clinoptilolite Supplementation Restores Energy Balance in High Yielding Dairy Cows
Source: Metabolites. 2021 Dec 5;11(12):842. doi: 10.3390/metabo11120842 (PMC8705350; doi:10.3390/metabo11120842)
Supplement: Supplementary file 1 [file metabolites-11-00842-s001.zip]

Archive with 8 entries (8 files):
- supplementary files/Supplementary Information.pdf
- supplementary files/Supplementary Table S1.xlsx
- supplementary files/Supplementary Table S2.xlsx
- supplementary files/Supplementary Table S3.xlsx
- supplementary files/Supplementary Table S4.xlsx
- supplementary files/Supplementary Table S5.xlsx
- supplementary files/Supplementary Table S6.xlsx
- supplementary files/Supplementary Table S7.xlsx
