# Supplementary material for: Integrated Metabolomics and Proteomics Dynamics of Serum Samples Reveals Dietary Zeolite Clinoptilolite Supplementation Restores Energy Balance in High Yielding Dairy Cows
Source: Metabolites. 2021 Dec 5;11(12):842. doi: 10.3390/metabo11120842 (PMC8705350; doi:10.3390/metabo11120842)
Supplement: Supplementary file 1 [file metabolites-11-00842-s001.zip › supplementary files/Supplementary Table S1.xlsx]

## Sheet: Sheet1
Supplementary Table S1. The list of samples in control group and CPL treatment with their respective BHB and NEFA concentrations.
CONTROL							AFTER SUPPLEMENTATION
Sample Name	BHB	NEFA					Sample Name	BHB	NEFA
30pre-C1	0.5587	0.0494					30pre-S1	0.5113	0.028
30pre-C2	0.7266	0.0214					30pre-S2	0.7802	0.0099
30pre-C3	0.7447	0.0394					30pre-S3	0.6601	0.0646
30pre-C4	0.5627	0.0536					30pre-S4	0.5384	0.0272
30pre-C5	0.4728	0.0186					30pre-S5	0.6372	0.1398
30pre-C6	0.4402	0.0313					30pre-S6	0.7523	0.0442
30pre-C7	0.6818	0.0233					30pre-S7	0.4718	0.0627
30pre-C8	0.5505	0.0182					30pre-S8	0.6044	0.0432
10pre-C1	0.9122	2.4459					10pre-S1	0.8774	0.0251
10pre-C2	0.4763	0.031					10pre-S2	0.7879	0.0301
10pre-C3	0.6247	0.0518					10pre-S3	0.7844	0.0391
10pre-C4	0.5757	0.3164					10pre-S4	0.5103	0.0396
10pre-C5	0.4748	0.0162					10pre-S5	0.5534	0.0321
10pre-C6	0.2868	0.1652					10pre-S6	0.7846	0.1149
10pre-C7	0.6902	0.0233					10pre-S7	0.696	0.0539
10pre-C8	0.5338	0.0169					10pre-S8	0.6564	0.0435
5post-C1	1.1483	2.6855					5post-S1	0.9616	0.2834
5post-C2	0.7745	0.2779					5post-S2	0.5274	0.4917
5post-C3	0.6007	0.0211					5post-S3	0.6084	0.0363
5post-C4	0.9177	0.8437					5post-S4	0.49	0.0408
5post-C5	1.5354	1.5856					5post-S5	0.5857	0.0371
5post-C6	1.6984	0.8934					5post-S6	0.5406	0.1111
5post-C7	0.9013	0.4571					5post-S7	0.586	0.0717
5post-C8	1.2535	0.9691					5post-S8	0.8491	0.6015
26post-C1	2.4755	0.4495					26post-S1	0.842	0.071
26post-C2	0.6498	0.1541					26post-S2	0.7659	0.0589
26post-C3	0.3558	0.4157					26post-S3	1.077	0.0284
26post-C4	0.4744	0.0894					26post-S4	0.4896	0.0357
26post-C5	0.6301	0.2918					26post-S5	0.3968	0.0266
26post-C6	0.6636	0.9071					26post-S6	0.6438	0.064
26post-C7	0.5486	0.2362					26post-S7	0.6042	0.0498
26post-C8	0.8837	0.2196					26post-S8	0.3649	0.0204
