# Supplementary material for: Integrated Metabolomics and Proteomics Dynamics of Serum Samples Reveals Dietary Zeolite Clinoptilolite Supplementation Restores Energy Balance in High Yielding Dairy Cows
Source: Metabolites. 2021 Dec 5;11(12):842. doi: 10.3390/metabo11120842 (PMC8705350; doi:10.3390/metabo11120842)
Supplement: Supplementary file 1 [file metabolites-11-00842-s001.zip › supplementary files/Supplementary Table S2.xlsx]

## Sheet: Sheet2
Supplementary Table S2. List of all metabolites annotated and/or identified by PiMP.
Compound id	Peak ID	Name	Formula	SuperPathway	Pathway	C1_30dPP	C2_30dPP	C3_30dPP	C4_30dPP	C5_30dPP	C6_30dPP	C7_30dPP	C8_30dPP	median 30pp	C1_10dPP	C2_10dPP	C3_10dPP	C4_10dPP	C5_10dPP	C6_10dPP	C7_10dPP	C8_10dPP	median 10pp	C1_5dpostP	C2_5dpostP	C3_5dpostP	C4_5dpostP	C5_5dpostP	C6_5dpostP	C7_5dpostP	C8_5dpostP	median 5post	C1_26dpostP	C2_26dpostP	C3_26dpostP	C4_26dpostP	C5_26dpostP	C6_26dpostP	C7_26dpostP	C8_26dpostP	median 26post	S1_30dpp	S2_30dpp	S3_30dpp	S4_30dpp	S5_30dpp	S6_30dpp	S7_30dpp	S8_30dpp
15632058	1	Betaine	C5H11NO2	Metabolism; Amino acid metabolism Environmental Information Processing; Membrane transport	Glycine, serine and threonine metabolism ABC transporters	242005936	325455680	107025784	231747200	294391872	326723136	536112256	503803040	309923776	184997264	303285152	94482280	310202880	582932928	299292704	551809408	483489792	306744016	337330496	328867488	437756800	307256160	124510504	224653904	193778784	147505104	265955032	251307712	223829168	271016800	258658800	209078096	362010624	71056896	141270640	237568440	372368032	150316736	434416896	481945472	208067776	797335808	336030848	362531040
15632060	1	Vaporole	C5H11NO2	None	None	242005936	325455680	107025784	231747200	294391872	326723136	536112256	503803040	309923776	184997264	303285152	94482280	310202880	582932928	299292704	551809408	483489792	306744016	337330496	328867488	437756800	307256160	124510504	224653904	193778784	147505104	265955032	251307712	223829168	271016800	258658800	209078096	362010624	71056896	141270640	237568440	372368032	150316736	434416896	481945472	208067776	797335808	336030848	362531040
15632061	1	Amyl Nitrite	C5H11NO2	None	None	242005936	325455680	107025784	231747200	294391872	326723136	536112256	503803040	309923776	184997264	303285152	94482280	310202880	582932928	299292704	551809408	483489792	306744016	337330496	328867488	437756800	307256160	124510504	224653904	193778784	147505104	265955032	251307712	223829168	271016800	258658800	209078096	362010624	71056896	141270640	237568440	372368032	150316736	434416896	481945472	208067776	797335808	336030848	362531040
15632062	1	N-Methyl-a-aminoisobutyric acid	C5H11NO2	None	None	242005936	325455680	107025784	231747200	294391872	326723136	536112256	503803040	309923776	184997264	303285152	94482280	310202880	582932928	299292704	551809408	483489792	306744016	337330496	328867488	437756800	307256160	124510504	224653904	193778784	147505104	265955032	251307712	223829168	271016800	258658800	209078096	362010624	71056896	141270640	237568440	372368032	150316736	434416896	481945472	208067776	797335808	336030848	362531040
15632064	1	D-Norvaline	C5H11NO2	None	None	242005936	325455680	107025784	231747200	294391872	326723136	536112256	503803040	309923776	184997264	303285152	94482280	310202880	582932928	299292704	551809408	483489792	306744016	337330496	328867488	437756800	307256160	124510504	224653904	193778784	147505104	265955032	251307712	223829168	271016800	258658800	209078096	362010624	71056896	141270640	237568440	372368032	150316736	434416896	481945472	208067776	797335808	336030848	362531040
15632065	1	5-Aminopentanoate	C5H11NO2	Metabolism; Amino acid metabolism Metabolism; Amino acid metabolism	Arginine and proline metabolism Lysine degradation	242005936	325455680	107025784	231747200	294391872	326723136	536112256	503803040	309923776	184997264	303285152	94482280	310202880	582932928	299292704	551809408	483489792	306744016	337330496	328867488	437756800	307256160	124510504	224653904	193778784	147505104	265955032	251307712	223829168	271016800	258658800	209078096	362010624	71056896	141270640	237568440	372368032	150316736	434416896	481945472	208067776	797335808	336030848	362531040
15632066	1	D-Valine	C5H11NO2	None	None	242005936	325455680	107025784	231747200	294391872	326723136	536112256	503803040	309923776	184997264	303285152	94482280	310202880	582932928	299292704	551809408	483489792	306744016	337330496	328867488	437756800	307256160	124510504	224653904	193778784	147505104	265955032	251307712	223829168	271016800	258658800	209078096	362010624	71056896	141270640	237568440	372368032	150316736	434416896	481945472	208067776	797335808	336030848	362531040
15632068	1	2S-amino-pentanoic acid	C5H11NO2	None	None	242005936	325455680	107025784	231747200	294391872	326723136	536112256	503803040	309923776	184997264	303285152	94482280	310202880	582932928	299292704	551809408	483489792	306744016	337330496	328867488	437756800	307256160	124510504	224653904	193778784	147505104	265955032	251307712	223829168	271016800	258658800	209078096	362010624	71056896	141270640	237568440	372368032	150316736	434416896	481945472	208067776	797335808	336030848	362531040
15632069	1	4-Methylaminobutyrate	C5H11NO2	Metabolism; Metabolism of cofactors and vitamins	Nicotinate and nicotinamide metabolism	242005936	325455680	107025784	231747200	294391872	326723136	536112256	503803040	309923776	184997264	303285152	94482280	310202880	582932928	299292704	551809408	483489792	306744016	337330496	328867488	437756800	307256160	124510504	224653904	193778784	147505104	265955032	251307712	223829168	271016800	258658800	209078096	362010624	71056896	141270640	237568440	372368032	150316736	434416896	481945472	208067776	797335808	336030848	362531040
15632070	1	2-Amino-2-methylbutanoate	C5H11NO2	None	None	242005936	325455680	107025784	231747200	294391872	326723136	536112256	503803040	309923776	184997264	303285152	94482280	310202880	582932928	299292704	551809408	483489792	306744016	337330496	328867488	437756800	307256160	124510504	224653904	193778784	147505104	265955032	251307712	223829168	271016800	258658800	209078096	362010624	71056896	141270640	237568440	372368032	150316736	434416896	481945472	208067776	797335808	336030848	362531040
15632072	1	2-Amino-3-methylbutanoic acid	C5H11NO2	None	None	242005936	325455680	107025784	231747200	294391872	326723136	536112256	503803040	309923776	184997264	303285152	94482280	310202880	582932928	299292704	551809408	483489792	306744016	337330496	328867488	437756800	307256160	124510504	224653904	193778784	147505104	265955032	251307712	223829168	271016800	258658800	209078096	362010624	71056896	141270640	237568440	372368032	150316736	434416896	481945472	208067776	797335808	336030848	362531040
15632073	1	4S-aminopentanoic acid	C5H11NO2	None	None	242005936	325455680	107025784	231747200	294391872	326723136	536112256	503803040	309923776	184997264	303285152	94482280	310202880	582932928	299292704	551809408	483489792	306744016	337330496	328867488	437756800	307256160	124510504	224653904	193778784	147505104	265955032	251307712	223829168	271016800	258658800	209078096	362010624	71056896	141270640	237568440	372368032	150316736	434416896	481945472	208067776	797335808	336030848	362531040
15632074	1	4-amino-pentanoic acid	C5H11NO2	None	None	242005936	325455680	107025784	231747200	294391872	326723136	536112256	503803040	309923776	184997264	303285152	94482280	310202880	582932928	299292704	551809408	483489792	306744016	337330496	328867488	437756800	307256160	124510504	224653904	193778784	147505104	265955032	251307712	223829168	271016800	258658800	209078096	362010624	71056896	141270640	237568440	372368032	150316736	434416896	481945472	208067776	797335808	336030848	362531040
15632075	1	4R-aminopentanoic acid	C5H11NO2	None	None	242005936	325455680	107025784	231747200	294391872	326723136	536112256	503803040	309923776	184997264	303285152	94482280	310202880	582932928	299292704	551809408	483489792	306744016	337330496	328867488	437756800	307256160	124510504	224653904	193778784	147505104	265955032	251307712	223829168	271016800	258658800	209078096	362010624	71056896	141270640	237568440	372368032	150316736	434416896	481945472	208067776	797335808	336030848	362531040
15632076	2	Creatine	C4H9N3O2	Metabolism; Amino acid metabolism Metabolism; Amino acid metabolism	Arginine and proline metabolism Glycine, serine and threonine metabolism	585924160	452514496	580099840	358393792	437989824	414218176	475804128	456579872	454547184	592398208	416984544	469103840	436422912	505730496	467870240	498068448	398749504	468487040	466418400	396669952	475071552	398362688	435646912	512406432	443141344	544856576	454779872	547726592	346164672	446866976	403996608	552598336	464726720	503078464	520451104	483902592	462703520	516677984	479205568	516320288	446030240	524650784	574899712	594531200
15632077	2	3-Guanidinopropanoate	C4H9N3O2	None	None	585924160	452514496	580099840	358393792	437989824	414218176	475804128	456579872	454547184	592398208	416984544	469103840	436422912	505730496	467870240	498068448	398749504	468487040	466418400	396669952	475071552	398362688	435646912	512406432	443141344	544856576	454779872	547726592	346164672	446866976	403996608	552598336	464726720	503078464	520451104	483902592	462703520	516677984	479205568	516320288	446030240	524650784	574899712	594531200
15632083	4	Streptidine	C8H18N6O4	None	None	1.08143e+06	620708	1.02657e+06	420782	624531	401901	810110	507051	622620	1.2133e+06	569575	640723	546122	620888	726265	762810	489230	630805	813919	442695	914109	499415	509333	1.02876e+06	826027	941193	819973	971520	329988	506270	559658	883388	632807	801546	924968	717177	537266	647569	1.00551e+06	805891	588832	932710	1054623	1.23453e+06
15632084	5	Creatinine	C4H7N3O	Metabolism; Amino acid metabolism	Arginine and proline metabolism	178718992	184977440	167521280	159961328	170277296	153929680	175007504	140918816	168899288	181262304	206732656	150332784	148127312	188118672	121187488	179613328	133353792	164973056	187992608	192278064	121275824	143587056	206402416	272529632	151499712	186518400	187255504	147198080	163871360	142891760	163158976	190643536	131150272	171138432	177982576	163515168	195392096	215302768	139158784	151514336	149727088	149787312	148750336	194014864
15632085	5	3-(N-Nitrosomethylamino)propionitrile	C4H7N3O	None	None	178718992	184977440	167521280	159961328	170277296	153929680	175007504	140918816	168899288	181262304	206732656	150332784	148127312	188118672	121187488	179613328	133353792	164973056	187992608	192278064	121275824	143587056	206402416	272529632	151499712	186518400	187255504	147198080	163871360	142891760	163158976	190643536	131150272	171138432	177982576	163515168	195392096	215302768	139158784	151514336	149727088	149787312	148750336	194014864
15632091	10	Pterolactam	C5H9NO2	None	None	60020464	54114096	59215048	66861116	54789824	58792004	71983920	39091284	59003526	64272064	67963688	44179708	70592008	99540968	62319920	70648048	40368384	66117876	54714340	76397216	57383220	83704888	58878008	62438452	75569296	69185808	65812130	72162720	53800400	48388872	63704208	71681920	58584816	56464376	65135176	61144512	54494684	61479488	59890332	54927196	50012836	54208496	54067580	44257460
15632092	10	L-Proline	C5H9NO2	Environmental Information Processing; Membrane transport Organismal Systems; Digestive system Organismal Systems; Digestive system Genetic Information Processing; Translation Metabolism; Amino acid metabolism Metabolism; Biosynthesis of other secondary metabolites	ABC transporters Mineral absorption Protein digestion and absorption Aminoacyl-tRNA biosynthesis Arginine and proline metabolism Novobiocin biosynthesis	60020464	54114096	59215048	66861116	54789824	58792004	71983920	39091284	59003526	64272064	67963688	44179708	70592008	99540968	62319920	70648048	40368384	66117876	54714340	76397216	57383220	83704888	58878008	62438452	75569296	69185808	65812130	72162720	53800400	48388872	63704208	71681920	58584816	56464376	65135176	61144512	54494684	61479488	59890332	54927196	50012836	54208496	54067580	44257460
15632094	10	4-Amino-2-methylenebutanoic acid	C5H9NO2	None	None	60020464	54114096	59215048	66861116	54789824	58792004	71983920	39091284	59003526	64272064	67963688	44179708	70592008	99540968	62319920	70648048	40368384	66117876	54714340	76397216	57383220	83704888	58878008	62438452	75569296	69185808	65812130	72162720	53800400	48388872	63704208	71681920	58584816	56464376	65135176	61144512	54494684	61479488	59890332	54927196	50012836	54208496	54067580	44257460
15632095	10	3-Acetamidopropanal	C5H9NO2	None	None	60020464	54114096	59215048	66861116	54789824	58792004	71983920	39091284	59003526	64272064	67963688	44179708	70592008	99540968	62319920	70648048	40368384	66117876	54714340	76397216	57383220	83704888	58878008	62438452	75569296	69185808	65812130	72162720	53800400	48388872	63704208	71681920	58584816	56464376	65135176	61144512	54494684	61479488	59890332	54927196	50012836	54208496	54067580	44257460
15632100	10	D-Proline	C5H9NO2	Metabolism; Amino acid metabolism	Arginine and proline metabolism	60020464	54114096	59215048	66861116	54789824	58792004	71983920	39091284	59003526	64272064	67963688	44179708	70592008	99540968	62319920	70648048	40368384	66117876	54714340	76397216	57383220	83704888	58878008	62438452	75569296	69185808	65812130	72162720	53800400	48388872	63704208	71681920	58584816	56464376	65135176	61144512	54494684	61479488	59890332	54927196	50012836	54208496	54067580	44257460
15632104	10	Proline	C5H9NO2	None	None	60020464	54114096	59215048	66861116	54789824	58792004	71983920	39091284	59003526	64272064	67963688	44179708	70592008	99540968	62319920	70648048	40368384	66117876	54714340	76397216	57383220	83704888	58878008	62438452	75569296	69185808	65812130	72162720	53800400	48388872	63704208	71681920	58584816	56464376	65135176	61144512	54494684	61479488	59890332	54927196	50012836	54208496	54067580	44257460
15632106	12	Hydroxyprolyl-Valine	C10H18N2O4	None	None	68450.8	45999.3	40778.4	77110.8	30121	64040.7	64092.7	40319.8	55020	81808.3	60174.3	32269.9	77783.4	110589	69932.3	82093.6	27232.5	73857.9	53495.2	74943	55232.8	85088.9	42806.4	68784.6	86721.7	69332.7	69058.7	97222.4	44560.3	36022.5	83415.3	57746.8	51324.8	53387.4	71925.7	55567.1	44253.3	32750	53884	68344	41669.7	30624.7	37005.6	34855.2
15632107	12	Valyl-Hydroxyproline	C10H18N2O4	None	None	68450.8	45999.3	40778.4	77110.8	30121	64040.7	64092.7	40319.8	55020	81808.3	60174.3	32269.9	77783.4	110589	69932.3	82093.6	27232.5	73857.9	53495.2	74943	55232.8	85088.9	42806.4	68784.6	86721.7	69332.7	69058.7	97222.4	44560.3	36022.5	83415.3	57746.8	51324.8	53387.4	71925.7	55567.1	44253.3	32750	53884	68344	41669.7	30624.7	37005.6	34855.2
15632167	20	Suxibuzone	C24H26N2O6	None	None	313516	307751	355528	296145	351872	356910	316012	322566	319289	297785	334879	286240	289418	295687	359753	327271	325723	311754	324229	331169	327373	334785	325030	290185	306126	305146	324630	286366	371296	390587	313501	372380	302165	318949	325601	322275	348832	306509	303821	337663	276579	366864	352852	318554
15632170	20	9-Chloro-11beta,17,21-trihydroxypregn-4-ene-3,20-dione 21-acetate	C23H31ClO6	None	None	313516	307751	355528	296145	351872	356910	316012	322566	319289	297785	334879	286240	289418	295687	359753	327271	325723	311754	324229	331169	327373	334785	325030	290185	306126	305146	324630	286366	371296	390587	313501	372380	302165	318949	325601	322275	348832	306509	303821	337663	276579	366864	352852	318554
15632171	20	punaglandin 7	C23H31ClO6	None	None	313516	307751	355528	296145	351872	356910	316012	322566	319289	297785	334879	286240	289418	295687	359753	327271	325723	311754	324229	331169	327373	334785	325030	290185	306126	305146	324630	286366	371296	390587	313501	372380	302165	318949	325601	322275	348832	306509	303821	337663	276579	366864	352852	318554
15632196	42	L-Glutamine	C5H10N2O3	Metabolism; Amino acid metabolism Genetic Information Processing; Translation Organismal Systems; Nervous system Organismal Systems; Nervous system Environmental Information Processing; Membrane transport Organismal Systems; Digestive system Metabolism; Nucleotide metabolism Organismal Systems; Excretory system Metabolism; Carbohydrate metabolism Metabolism; Nucleotide metabolism Organismal Syste…	Arginine and proline metabolism Aminoacyl-tRNA biosynthesis GABAergic synapse Glutamatergic synapse ABC transporters Mineral absorption Pyrimidine metabolism Proximal tubule bicarbonate reclamation Glyoxylate and dicarboxylate metabolism Purine metabolism Protein digestion and absorption D-Glutamine and D-glutamate metabolism Alanine, aspartate and glutamate metabolism Nitrogen metabolism Two-com…	55257060	53648564	53929864	78011128	51703016	72669704	59772820	62329452	57514940	55746040	59579548	51811356	69629464	76732384	65521884	60568116	63454836	62011476	46855756	54225856	67569288	50618444	45576736	47444200	49263852	78622064	49941148	62380264	71422112	67128024	79004896	60695680	47414028	65589332	71586784	66358678	62982020	49129308	46691176	44611148	52194284	42311788	56477280	56484144
15632198	42	Alanylglycine	C5H10N2O3	None	None	55257060	53648564	53929864	78011128	51703016	72669704	59772820	62329452	57514940	55746040	59579548	51811356	69629464	76732384	65521884	60568116	63454836	62011476	46855756	54225856	67569288	50618444	45576736	47444200	49263852	78622064	49941148	62380264	71422112	67128024	79004896	60695680	47414028	65589332	71586784	66358678	62982020	49129308	46691176	44611148	52194284	42311788	56477280	56484144
15632199	42	3-Ureidoisobutyrate	C5H10N2O3	Metabolism; Nucleotide metabolism	Pyrimidine metabolism	55257060	53648564	53929864	78011128	51703016	72669704	59772820	62329452	57514940	55746040	59579548	51811356	69629464	76732384	65521884	60568116	63454836	62011476	46855756	54225856	67569288	50618444	45576736	47444200	49263852	78622064	49941148	62380264	71422112	67128024	79004896	60695680	47414028	65589332	71586784	66358678	62982020	49129308	46691176	44611148	52194284	42311788	56477280	56484144
15632201	42	D-Glutamine	C5H10N2O3	Metabolism; Metabolism of other amino acids	D-Glutamine and D-glutamate metabolism	55257060	53648564	53929864	78011128	51703016	72669704	59772820	62329452	57514940	55746040	59579548	51811356	69629464	76732384	65521884	60568116	63454836	62011476	46855756	54225856	67569288	50618444	45576736	47444200	49263852	78622064	49941148	62380264	71422112	67128024	79004896	60695680	47414028	65589332	71586784	66358678	62982020	49129308	46691176	44611148	52194284	42311788	56477280	56484144
15632203	42	Glutamine	C5H10N2O3	None	None	55257060	53648564	53929864	78011128	51703016	72669704	59772820	62329452	57514940	55746040	59579548	51811356	69629464	76732384	65521884	60568116	63454836	62011476	46855756	54225856	67569288	50618444	45576736	47444200	49263852	78622064	49941148	62380264	71422112	67128024	79004896	60695680	47414028	65589332	71586784	66358678	62982020	49129308	46691176	44611148	52194284	42311788	56477280	56484144
15632204	42	Isoglutamine	C5H10N2O3	Metabolism; Amino acid metabolism	Histidine metabolism	55257060	53648564	53929864	78011128	51703016	72669704	59772820	62329452	57514940	55746040	59579548	51811356	69629464	76732384	65521884	60568116	63454836	62011476	46855756	54225856	67569288	50618444	45576736	47444200	49263852	78622064	49941148	62380264	71422112	67128024	79004896	60695680	47414028	65589332	71586784	66358678	62982020	49129308	46691176	44611148	52194284	42311788	56477280	56484144
15632212	43	N-Nitrosoguvacoline	C7H10N2O3	None	None	2.35033e+06	2.86644e+06	2.69191e+06	4014265	2.68373e+06	3.13633e+06	3.08153e+06	2.96675e+06	2.9166e+06	2.81851e+06	2.98776e+06	2.69152e+06	3.30179e+06	3.64989e+06	3.2034e+06	3.00364e+06	3.17221e+06	3087929	2552633	2.70334e+06	3.60888e+06	2640209	2.31318e+06	2.15145e+06	2.4628e+06	3.50711e+06	2596421	2982589	3.56693e+06	2.99565e+06	3834075	3.04467e+06	2297385	3.30259e+06	3.55923e+06	3.17363e+06	3.14813e+06	2333644	2.51352e+06	2.34213e+06	2.89404e+06	2.04316e+06	2.79813e+06	2439425
15632216	44	Miraxanthin-I	C14H18N2O7S	None	None	496707	324588	688300	572741	448436	749059	579972	537393	555067	499071	644969	396222	529855	715661	503229	559827	553648	541751	502792	563309	809661	512063	446537	390946	594547	713610	537686	489570	826007	876653	641270	654077	426643	657247	922073	655662	753666	417567	428702	407921	547204	377994	594014	444211
15632217	44	5,7-Dihydroxyflavone 7-benzoate	C22H14O5	None	None	496707	324588	688300	572741	448436	749059	579972	537393	555067	499071	644969	396222	529855	715661	503229	559827	553648	541751	502792	563309	809661	512063	446537	390946	594547	713610	537686	489570	826007	876653	641270	654077	426643	657247	922073	655662	753666	417567	428702	407921	547204	377994	594014	444211
15632228	47	PC(18:1(9Z)/18:1(9Z))	C44H84NO8P	None	None	59723616	59728008	53887012	65292348	42595148	51205532	46444968	26135792	52546272	61507320	60680908	45263080	58239220	49536944	27131114	47164144	23160398	48350544	29079454	39334336	25773844	50005676	35784440	30999964	48069768	44739804	37559388	34285372	25761456	36425388	52780888	39215896	46884080	43026744	45513872	41121320	36223412	71775824	54252724	45887792	40374660	56218952	57935028	36790780
15632232	47	PC(20:2(11Z,14Z)/16:0)	C44H84NO8P	None	None	59723616	59728008	53887012	65292348	42595148	51205532	46444968	26135792	52546272	61507320	60680908	45263080	58239220	49536944	27131114	47164144	23160398	48350544	29079454	39334336	25773844	50005676	35784440	30999964	48069768	44739804	37559388	34285372	25761456	36425388	52780888	39215896	46884080	43026744	45513872	41121320	36223412	71775824	54252724	45887792	40374660	56218952	57935028	36790780
15632233	47	PC(22:1(13Z)/14:1(9Z))	C44H84NO8P	None	None	59723616	59728008	53887012	65292348	42595148	51205532	46444968	26135792	52546272	61507320	60680908	45263080	58239220	49536944	27131114	47164144	23160398	48350544	29079454	39334336	25773844	50005676	35784440	30999964	48069768	44739804	37559388	34285372	25761456	36425388	52780888	39215896	46884080	43026744	45513872	41121320	36223412	71775824	54252724	45887792	40374660	56218952	57935028	36790780
15632234	47	PC(22:2(13Z,16Z)/14:0)	C44H84NO8P	None	None	59723616	59728008	53887012	65292348	42595148	51205532	46444968	26135792	52546272	61507320	60680908	45263080	58239220	49536944	27131114	47164144	23160398	48350544	29079454	39334336	25773844	50005676	35784440	30999964	48069768	44739804	37559388	34285372	25761456	36425388	52780888	39215896	46884080	43026744	45513872	41121320	36223412	71775824	54252724	45887792	40374660	56218952	57935028	36790780
15632235	47	PC(16:1(9Z)/20:1(11Z))	C44H84NO8P	None	None	59723616	59728008	53887012	65292348	42595148	51205532	46444968	26135792	52546272	61507320	60680908	45263080	58239220	49536944	27131114	47164144	23160398	48350544	29079454	39334336	25773844	50005676	35784440	30999964	48069768	44739804	37559388	34285372	25761456	36425388	52780888	39215896	46884080	43026744	45513872	41121320	36223412	71775824	54252724	45887792	40374660	56218952	57935028	36790780
15632236	47	PC(18:0/18:2(9Z,12Z))	C44H84NO8P	None	None	59723616	59728008	53887012	65292348	42595148	51205532	46444968	26135792	52546272	61507320	60680908	45263080	58239220	49536944	27131114	47164144	23160398	48350544	29079454	39334336	25773844	50005676	35784440	30999964	48069768	44739804	37559388	34285372	25761456	36425388	52780888	39215896	46884080	43026744	45513872	41121320	36223412	71775824	54252724	45887792	40374660	56218952	57935028	36790780
15632237	47	PC(18:1(11Z)/18:1(9Z))	C44H84NO8P	None	None	59723616	59728008	53887012	65292348	42595148	51205532	46444968	26135792	52546272	61507320	60680908	45263080	58239220	49536944	27131114	47164144	23160398	48350544	29079454	39334336	25773844	50005676	35784440	30999964	48069768	44739804	37559388	34285372	25761456	36425388	52780888	39215896	46884080	43026744	45513872	41121320	36223412	71775824	54252724	45887792	40374660	56218952	57935028	36790780
15632238	47	PC(18:1(11Z)/18:1(11Z))	C44H84NO8P	None	None	59723616	59728008	53887012	65292348	42595148	51205532	46444968	26135792	52546272	61507320	60680908	45263080	58239220	49536944	27131114	47164144	23160398	48350544	29079454	39334336	25773844	50005676	35784440	30999964	48069768	44739804	37559388	34285372	25761456	36425388	52780888	39215896	46884080	43026744	45513872	41121320	36223412	71775824	54252724	45887792	40374660	56218952	57935028	36790780
15632239	47	PC(18:2(9Z,12Z)/18:0)	C44H84NO8P	None	None	59723616	59728008	53887012	65292348	42595148	51205532	46444968	26135792	52546272	61507320	60680908	45263080	58239220	49536944	27131114	47164144	23160398	48350544	29079454	39334336	25773844	50005676	35784440	30999964	48069768	44739804	37559388	34285372	25761456	36425388	52780888	39215896	46884080	43026744	45513872	41121320	36223412	71775824	54252724	45887792	40374660	56218952	57935028	36790780
15632240	47	PC(18:1(9Z)/18:1(11Z))	C44H84NO8P	None	None	59723616	59728008	53887012	65292348	42595148	51205532	46444968	26135792	52546272	61507320	60680908	45263080	58239220	49536944	27131114	47164144	23160398	48350544	29079454	39334336	25773844	50005676	35784440	30999964	48069768	44739804	37559388	34285372	25761456	36425388	52780888	39215896	46884080	43026744	45513872	41121320	36223412	71775824	54252724	45887792	40374660	56218952	57935028	36790780
15632241	47	PC(20:1(11Z)/16:1(9Z))	C44H84NO8P	None	None	59723616	59728008	53887012	65292348	42595148	51205532	46444968	26135792	52546272	61507320	60680908	45263080	58239220	49536944	27131114	47164144	23160398	48350544	29079454	39334336	25773844	50005676	35784440	30999964	48069768	44739804	37559388	34285372	25761456	36425388	52780888	39215896	46884080	43026744	45513872	41121320	36223412	71775824	54252724	45887792	40374660	56218952	57935028	36790780
15632242	47	PC(18:1(9Z)/18:1(9Z))	C44H84NO8P	None	None	59723616	59728008	53887012	65292348	42595148	51205532	46444968	26135792	52546272	61507320	60680908	45263080	58239220	49536944	27131114	47164144	23160398	48350544	29079454	39334336	25773844	50005676	35784440	30999964	48069768	44739804	37559388	34285372	25761456	36425388	52780888	39215896	46884080	43026744	45513872	41121320	36223412	71775824	54252724	45887792	40374660	56218952	57935028	36790780
15632243	47	PC(14:1(9Z)/22:1(13Z))	C44H84NO8P	None	None	59723616	59728008	53887012	65292348	42595148	51205532	46444968	26135792	52546272	61507320	60680908	45263080	58239220	49536944	27131114	47164144	23160398	48350544	29079454	39334336	25773844	50005676	35784440	30999964	48069768	44739804	37559388	34285372	25761456	36425388	52780888	39215896	46884080	43026744	45513872	41121320	36223412	71775824	54252724	45887792	40374660	56218952	57935028	36790780
15632244	47	PC(16:0/20:2(11Z,14Z))	C44H84NO8P	None	None	59723616	59728008	53887012	65292348	42595148	51205532	46444968	26135792	52546272	61507320	60680908	45263080	58239220	49536944	27131114	47164144	23160398	48350544	29079454	39334336	25773844	50005676	35784440	30999964	48069768	44739804	37559388	34285372	25761456	36425388	52780888	39215896	46884080	43026744	45513872	41121320	36223412	71775824	54252724	45887792	40374660	56218952	57935028	36790780
15632251	47	PC(14:0/22:2(13Z,16Z))	C44H84NO8P	None	None	59723616	59728008	53887012	65292348	42595148	51205532	46444968	26135792	52546272	61507320	60680908	45263080	58239220	49536944	27131114	47164144	23160398	48350544	29079454	39334336	25773844	50005676	35784440	30999964	48069768	44739804	37559388	34285372	25761456	36425388	52780888	39215896	46884080	43026744	45513872	41121320	36223412	71775824	54252724	45887792	40374660	56218952	57935028	36790780
15632261	47	PC(22:1(11Z)/14:1(9Z))	C44H84NO8P	None	None	59723616	59728008	53887012	65292348	42595148	51205532	46444968	26135792	52546272	61507320	60680908	45263080	58239220	49536944	27131114	47164144	23160398	48350544	29079454	39334336	25773844	50005676	35784440	30999964	48069768	44739804	37559388	34285372	25761456	36425388	52780888	39215896	46884080	43026744	45513872	41121320	36223412	71775824	54252724	45887792	40374660	56218952	57935028	36790780
15632264	47	PE(22:1(11Z)/17:1(9Z))	C44H84NO8P	None	None	59723616	59728008	53887012	65292348	42595148	51205532	46444968	26135792	52546272	61507320	60680908	45263080	58239220	49536944	27131114	47164144	23160398	48350544	29079454	39334336	25773844	50005676	35784440	30999964	48069768	44739804	37559388	34285372	25761456	36425388	52780888	39215896	46884080	43026744	45513872	41121320	36223412	71775824	54252724	45887792	40374660	56218952	57935028	36790780
15632265	47	PE(22:2(13Z,16Z)/17:0)	C44H84NO8P	None	None	59723616	59728008	53887012	65292348	42595148	51205532	46444968	26135792	52546272	61507320	60680908	45263080	58239220	49536944	27131114	47164144	23160398	48350544	29079454	39334336	25773844	50005676	35784440	30999964	48069768	44739804	37559388	34285372	25761456	36425388	52780888	39215896	46884080	43026744	45513872	41121320	36223412	71775824	54252724	45887792	40374660	56218952	57935028	36790780
15632266	47	PE(21:0/18:2(9Z,12Z))	C44H84NO8P	None	None	59723616	59728008	53887012	65292348	42595148	51205532	46444968	26135792	52546272	61507320	60680908	45263080	58239220	49536944	27131114	47164144	23160398	48350544	29079454	39334336	25773844	50005676	35784440	30999964	48069768	44739804	37559388	34285372	25761456	36425388	52780888	39215896	46884080	43026744	45513872	41121320	36223412	71775824	54252724	45887792	40374660	56218952	57935028	36790780
15632267	47	PE(22:0/17:2(9Z,12Z))	C44H84NO8P	None	None	59723616	59728008	53887012	65292348	42595148	51205532	46444968	26135792	52546272	61507320	60680908	45263080	58239220	49536944	27131114	47164144	23160398	48350544	29079454	39334336	25773844	50005676	35784440	30999964	48069768	44739804	37559388	34285372	25761456	36425388	52780888	39215896	46884080	43026744	45513872	41121320	36223412	71775824	54252724	45887792	40374660	56218952	57935028	36790780
15632268	47	PC(18:1(10Z)/18:1(10Z))	C44H84NO8P	None	None	59723616	59728008	53887012	65292348	42595148	51205532	46444968	26135792	52546272	61507320	60680908	45263080	58239220	49536944	27131114	47164144	23160398	48350544	29079454	39334336	25773844	50005676	35784440	30999964	48069768	44739804	37559388	34285372	25761456	36425388	52780888	39215896	46884080	43026744	45513872	41121320	36223412	71775824	54252724	45887792	40374660	56218952	57935028	36790780
15632269	47	PC(18:1(11E)/18:1(11E))	C44H84NO8P	None	None	59723616	59728008	53887012	65292348	42595148	51205532	46444968	26135792	52546272	61507320	60680908	45263080	58239220	49536944	27131114	47164144	23160398	48350544	29079454	39334336	25773844	50005676	35784440	30999964	48069768	44739804	37559388	34285372	25761456	36425388	52780888	39215896	46884080	43026744	45513872	41121320	36223412	71775824	54252724	45887792	40374660	56218952	57935028	36790780
15632270	47	PC(18:1(12Z)/18:1(12Z))	C44H84NO8P	None	None	59723616	59728008	53887012	65292348	42595148	51205532	46444968	26135792	52546272	61507320	60680908	45263080	58239220	49536944	27131114	47164144	23160398	48350544	29079454	39334336	25773844	50005676	35784440	30999964	48069768	44739804	37559388	34285372	25761456	36425388	52780888	39215896	46884080	43026744	45513872	41121320	36223412	71775824	54252724	45887792	40374660	56218952	57935028	36790780
15632271	47	PC(18:1(7Z)/18:1(7Z))	C44H84NO8P	None	None	59723616	59728008	53887012	65292348	42595148	51205532	46444968	26135792	52546272	61507320	60680908	45263080	58239220	49536944	27131114	47164144	23160398	48350544	29079454	39334336	25773844	50005676	35784440	30999964	48069768	44739804	37559388	34285372	25761456	36425388	52780888	39215896	46884080	43026744	45513872	41121320	36223412	71775824	54252724	45887792	40374660	56218952	57935028	36790780
15632272	47	PC(18:1(9E)/18:1(9E))	C44H84NO8P	None	None	59723616	59728008	53887012	65292348	42595148	51205532	46444968	26135792	52546272	61507320	60680908	45263080	58239220	49536944	27131114	47164144	23160398	48350544	29079454	39334336	25773844	50005676	35784440	30999964	48069768	44739804	37559388	34285372	25761456	36425388	52780888	39215896	46884080	43026744	45513872	41121320	36223412	71775824	54252724	45887792	40374660	56218952	57935028	36790780
15632273	47	PC(18:1(8Z)/18:1(8Z))	C44H84NO8P	None	None	59723616	59728008	53887012	65292348	42595148	51205532	46444968	26135792	52546272	61507320	60680908	45263080	58239220	49536944	27131114	47164144	23160398	48350544	29079454	39334336	25773844	50005676	35784440	30999964	48069768	44739804	37559388	34285372	25761456	36425388	52780888	39215896	46884080	43026744	45513872	41121320	36223412	71775824	54252724	45887792	40374660	56218952	57935028	36790780
15632274	47	PC(18:1(14Z)/18:1(14Z))	C44H84NO8P	None	None	59723616	59728008	53887012	65292348	42595148	51205532	46444968	26135792	52546272	61507320	60680908	45263080	58239220	49536944	27131114	47164144	23160398	48350544	29079454	39334336	25773844	50005676	35784440	30999964	48069768	44739804	37559388	34285372	25761456	36425388	52780888	39215896	46884080	43026744	45513872	41121320	36223412	71775824	54252724	45887792	40374660	56218952	57935028	36790780
15632275	47	PC(18:1(13Z)/18:1(13Z))	C44H84NO8P	None	None	59723616	59728008	53887012	65292348	42595148	51205532	46444968	26135792	52546272	61507320	60680908	45263080	58239220	49536944	27131114	47164144	23160398	48350544	29079454	39334336	25773844	50005676	35784440	30999964	48069768	44739804	37559388	34285372	25761456	36425388	52780888	39215896	46884080	43026744	45513872	41121320	36223412	71775824	54252724	45887792	40374660	56218952	57935028	36790780
15632276	47	PC(18:1(17Z)/18:1(17Z))	C44H84NO8P	None	None	59723616	59728008	53887012	65292348	42595148	51205532	46444968	26135792	52546272	61507320	60680908	45263080	58239220	49536944	27131114	47164144	23160398	48350544	29079454	39334336	25773844	50005676	35784440	30999964	48069768	44739804	37559388	34285372	25761456	36425388	52780888	39215896	46884080	43026744	45513872	41121320	36223412	71775824	54252724	45887792	40374660	56218952	57935028	36790780
15632277	47	PC(18:1(16Z)/18:1(16Z))	C44H84NO8P	None	None	59723616	59728008	53887012	65292348	42595148	51205532	46444968	26135792	52546272	61507320	60680908	45263080	58239220	49536944	27131114	47164144	23160398	48350544	29079454	39334336	25773844	50005676	35784440	30999964	48069768	44739804	37559388	34285372	25761456	36425388	52780888	39215896	46884080	43026744	45513872	41121320	36223412	71775824	54252724	45887792	40374660	56218952	57935028	36790780
15632278	47	PC(18:1(15Z)/18:1(15Z))	C44H84NO8P	None	None	59723616	59728008	53887012	65292348	42595148	51205532	46444968	26135792	52546272	61507320	60680908	45263080	58239220	49536944	27131114	47164144	23160398	48350544	29079454	39334336	25773844	50005676	35784440	30999964	48069768	44739804	37559388	34285372	25761456	36425388	52780888	39215896	46884080	43026744	45513872	41121320	36223412	71775824	54252724	45887792	40374660	56218952	57935028	36790780
15632279	47	PC(18:1(2Z)/18:1(2Z))	C44H84NO8P	None	None	59723616	59728008	53887012	65292348	42595148	51205532	46444968	26135792	52546272	61507320	60680908	45263080	58239220	49536944	27131114	47164144	23160398	48350544	29079454	39334336	25773844	50005676	35784440	30999964	48069768	44739804	37559388	34285372	25761456	36425388	52780888	39215896	46884080	43026744	45513872	41121320	36223412	71775824	54252724	45887792	40374660	56218952	57935028	36790780
15632280	47	PC(18:1(5Z)/18:1(5Z))	C44H84NO8P	None	None	59723616	59728008	53887012	65292348	42595148	51205532	46444968	26135792	52546272	61507320	60680908	45263080	58239220	49536944	27131114	47164144	23160398	48350544	29079454	39334336	25773844	50005676	35784440	30999964	48069768	44739804	37559388	34285372	25761456	36425388	52780888	39215896	46884080	43026744	45513872	41121320	36223412	71775824	54252724	45887792	40374660	56218952	57935028	36790780
15632281	47	PC(18:1(3Z)/18:1(3Z))	C44H84NO8P	None	None	59723616	59728008	53887012	65292348	42595148	51205532	46444968	26135792	52546272	61507320	60680908	45263080	58239220	49536944	27131114	47164144	23160398	48350544	29079454	39334336	25773844	50005676	35784440	30999964	48069768	44739804	37559388	34285372	25761456	36425388	52780888	39215896	46884080	43026744	45513872	41121320	36223412	71775824	54252724	45887792	40374660	56218952	57935028	36790780
15632282	47	PC(18:1(6Z)/18:1(6Z))	C44H84NO8P	None	None	59723616	59728008	53887012	65292348	42595148	51205532	46444968	26135792	52546272	61507320	60680908	45263080	58239220	49536944	27131114	47164144	23160398	48350544	29079454	39334336	25773844	50005676	35784440	30999964	48069768	44739804	37559388	34285372	25761456	36425388	52780888	39215896	46884080	43026744	45513872	41121320	36223412	71775824	54252724	45887792	40374660	56218952	57935028	36790780
15632283	47	PC(18:1(6E)/18:1(6E))	C44H84NO8P	None	None	59723616	59728008	53887012	65292348	42595148	51205532	46444968	26135792	52546272	61507320	60680908	45263080	58239220	49536944	27131114	47164144	23160398	48350544	29079454	39334336	25773844	50005676	35784440	30999964	48069768	44739804	37559388	34285372	25761456	36425388	52780888	39215896	46884080	43026744	45513872	41121320	36223412	71775824	54252724	45887792	40374660	56218952	57935028	36790780
15632284	47	PC(18:0/18:2(6Z,9Z))	C44H84NO8P	None	None	59723616	59728008	53887012	65292348	42595148	51205532	46444968	26135792	52546272	61507320	60680908	45263080	58239220	49536944	27131114	47164144	23160398	48350544	29079454	39334336	25773844	50005676	35784440	30999964	48069768	44739804	37559388	34285372	25761456	36425388	52780888	39215896	46884080	43026744	45513872	41121320	36223412	71775824	54252724	45887792	40374660	56218952	57935028	36790780
15632285	47	PC(18:0/18:2(2E,4E))	C44H84NO8P	None	None	59723616	59728008	53887012	65292348	42595148	51205532	46444968	26135792	52546272	61507320	60680908	45263080	58239220	49536944	27131114	47164144	23160398	48350544	29079454	39334336	25773844	50005676	35784440	30999964	48069768	44739804	37559388	34285372	25761456	36425388	52780888	39215896	46884080	43026744	45513872	41121320	36223412	71775824	54252724	45887792	40374660	56218952	57935028	36790780
15632286	47	PC(18:0/18:2(10Z,12Z))	C44H84NO8P	None	None	59723616	59728008	53887012	65292348	42595148	51205532	46444968	26135792	52546272	61507320	60680908	45263080	58239220	49536944	27131114	47164144	23160398	48350544	29079454	39334336	25773844	50005676	35784440	30999964	48069768	44739804	37559388	34285372	25761456	36425388	52780888	39215896	46884080	43026744	45513872	41121320	36223412	71775824	54252724	45887792	40374660	56218952	57935028	36790780
15632287	47	PC(18:1(4Z)/18:1(4Z))	C44H84NO8P	None	None	59723616	59728008	53887012	65292348	42595148	51205532	46444968	26135792	52546272	61507320	60680908	45263080	58239220	49536944	27131114	47164144	23160398	48350544	29079454	39334336	25773844	50005676	35784440	30999964	48069768	44739804	37559388	34285372	25761456	36425388	52780888	39215896	46884080	43026744	45513872	41121320	36223412	71775824	54252724	45887792	40374660	56218952	57935028	36790780
15632288	47	PC(17:1(9Z)/19:1(9Z))	C44H84NO8P	None	None	59723616	59728008	53887012	65292348	42595148	51205532	46444968	26135792	52546272	61507320	60680908	45263080	58239220	49536944	27131114	47164144	23160398	48350544	29079454	39334336	25773844	50005676	35784440	30999964	48069768	44739804	37559388	34285372	25761456	36425388	52780888	39215896	46884080	43026744	45513872	41121320	36223412	71775824	54252724	45887792	40374660	56218952	57935028	36790780
15632289	47	PC(17:2(9Z,12Z)/19:0)	C44H84NO8P	None	None	59723616	59728008	53887012	65292348	42595148	51205532	46444968	26135792	52546272	61507320	60680908	45263080	58239220	49536944	27131114	47164144	23160398	48350544	29079454	39334336	25773844	50005676	35784440	30999964	48069768	44739804	37559388	34285372	25761456	36425388	52780888	39215896	46884080	43026744	45513872	41121320	36223412	71775824	54252724	45887792	40374660	56218952	57935028	36790780
15632290	47	PC(14:1(9Z)/22:1(11Z))	C44H84NO8P	None	None	59723616	59728008	53887012	65292348	42595148	51205532	46444968	26135792	52546272	61507320	60680908	45263080	58239220	49536944	27131114	47164144	23160398	48350544	29079454	39334336	25773844	50005676	35784440	30999964	48069768	44739804	37559388	34285372	25761456	36425388	52780888	39215896	46884080	43026744	45513872	41121320	36223412	71775824	54252724	45887792	40374660	56218952	57935028	36790780
15632291	47	PE(18:2(9Z,12Z)/21:0)	C44H84NO8P	None	None	59723616	59728008	53887012	65292348	42595148	51205532	46444968	26135792	52546272	61507320	60680908	45263080	58239220	49536944	27131114	47164144	23160398	48350544	29079454	39334336	25773844	50005676	35784440	30999964	48069768	44739804	37559388	34285372	25761456	36425388	52780888	39215896	46884080	43026744	45513872	41121320	36223412	71775824	54252724	45887792	40374660	56218952	57935028	36790780
15632292	47	PE(17:2(9Z,12Z)/22:0)	C44H84NO8P	None	None	59723616	59728008	53887012	65292348	42595148	51205532	46444968	26135792	52546272	61507320	60680908	45263080	58239220	49536944	27131114	47164144	23160398	48350544	29079454	39334336	25773844	50005676	35784440	30999964	48069768	44739804	37559388	34285372	25761456	36425388	52780888	39215896	46884080	43026744	45513872	41121320	36223412	71775824	54252724	45887792	40374660	56218952	57935028	36790780
15632293	47	PE(19:0/20:2(11Z,14Z))	C44H84NO8P	None	None	59723616	59728008	53887012	65292348	42595148	51205532	46444968	26135792	52546272	61507320	60680908	45263080	58239220	49536944	27131114	47164144	23160398	48350544	29079454	39334336	25773844	50005676	35784440	30999964	48069768	44739804	37559388	34285372	25761456	36425388	52780888	39215896	46884080	43026744	45513872	41121320	36223412	71775824	54252724	45887792	40374660	56218952	57935028	36790780
15632294	47	PE(17:0/22:2(13Z,16Z))	C44H84NO8P	None	None	59723616	59728008	53887012	65292348	42595148	51205532	46444968	26135792	52546272	61507320	60680908	45263080	58239220	49536944	27131114	47164144	23160398	48350544	29079454	39334336	25773844	50005676	35784440	30999964	48069768	44739804	37559388	34285372	25761456	36425388	52780888	39215896	46884080	43026744	45513872	41121320	36223412	71775824	54252724	45887792	40374660	56218952	57935028	36790780
15632295	47	PE(17:1(9Z)/22:1(11Z))	C44H84NO8P	None	None	59723616	59728008	53887012	65292348	42595148	51205532	46444968	26135792	52546272	61507320	60680908	45263080	58239220	49536944	27131114	47164144	23160398	48350544	29079454	39334336	25773844	50005676	35784440	30999964	48069768	44739804	37559388	34285372	25761456	36425388	52780888	39215896	46884080	43026744	45513872	41121320	36223412	71775824	54252724	45887792	40374660	56218952	57935028	36790780
15632296	47	PC(19:1(9Z)/17:1(9Z))	C44H84NO8P	None	None	59723616	59728008	53887012	65292348	42595148	51205532	46444968	26135792	52546272	61507320	60680908	45263080	58239220	49536944	27131114	47164144	23160398	48350544	29079454	39334336	25773844	50005676	35784440	30999964	48069768	44739804	37559388	34285372	25761456	36425388	52780888	39215896	46884080	43026744	45513872	41121320	36223412	71775824	54252724	45887792	40374660	56218952	57935028	36790780
15632297	47	PC(19:0/17:2(9Z,12Z))	C44H84NO8P	None	None	59723616	59728008	53887012	65292348	42595148	51205532	46444968	26135792	52546272	61507320	60680908	45263080	58239220	49536944	27131114	47164144	23160398	48350544	29079454	39334336	25773844	50005676	35784440	30999964	48069768	44739804	37559388	34285372	25761456	36425388	52780888	39215896	46884080	43026744	45513872	41121320	36223412	71775824	54252724	45887792	40374660	56218952	57935028	36790780
15632298	47	PE(20:2(11Z,14Z)/19:0)	C44H84NO8P	None	None	59723616	59728008	53887012	65292348	42595148	51205532	46444968	26135792	52546272	61507320	60680908	45263080	58239220	49536944	27131114	47164144	23160398	48350544	29079454	39334336	25773844	50005676	35784440	30999964	48069768	44739804	37559388	34285372	25761456	36425388	52780888	39215896	46884080	43026744	45513872	41121320	36223412	71775824	54252724	45887792	40374660	56218952	57935028	36790780
15632299	47	PE(19:1(9Z)/20:1(11Z))	C44H84NO8P	None	None	59723616	59728008	53887012	65292348	42595148	51205532	46444968	26135792	52546272	61507320	60680908	45263080	58239220	49536944	27131114	47164144	23160398	48350544	29079454	39334336	25773844	50005676	35784440	30999964	48069768	44739804	37559388	34285372	25761456	36425388	52780888	39215896	46884080	43026744	45513872	41121320	36223412	71775824	54252724	45887792	40374660	56218952	57935028	36790780
15632300	47	PE(20:1(11Z)/19:1(9Z))	C44H84NO8P	None	None	59723616	59728008	53887012	65292348	42595148	51205532	46444968	26135792	52546272	61507320	60680908	45263080	58239220	49536944	27131114	47164144	23160398	48350544	29079454	39334336	25773844	50005676	35784440	30999964	48069768	44739804	37559388	34285372	25761456	36425388	52780888	39215896	46884080	43026744	45513872	41121320	36223412	71775824	54252724	45887792	40374660	56218952	57935028	36790780
15632301	48	L-Pipecolate	C6H11NO2	Metabolism; Biosynthesis of other secondary metabolites Metabolism; Amino acid metabolism	Tropane, piperidine and pyridine alkaloid biosynthesis Lysine degradation	5715413	4.56262e+06	2234044	17176228	1.93321e+06	2264704	1.69188e+06	730505	2249374	59632664	49924928	13663829	17757666	1.46492e+06	3.5123e+06	1.6984e+06	855602	8.58806e+06	21505996	15542278	1.30611e+06	17385430	8682992	7352887	21440358	49164572	16463854	3.63039e+06	752746	1.25081e+06	2.0271e+06	2.64161e+06	2.78141e+06	2.63343e+06	4861192	2.63752e+06	19195438	64456672	1.79295e+06	2.14945e+06	2.2544e+06	2227835	2694829	5635606
15632303	48	Pipecolic acid	C6H11NO2	None	None	5715413	4.56262e+06	2234044	17176228	1.93321e+06	2264704	1.69188e+06	730505	2249374	59632664	49924928	13663829	17757666	1.46492e+06	3.5123e+06	1.6984e+06	855602	8.58806e+06	21505996	15542278	1.30611e+06	17385430	8682992	7352887	21440358	49164572	16463854	3.63039e+06	752746	1.25081e+06	2.0271e+06	2.64161e+06	2.78141e+06	2.63343e+06	4861192	2.63752e+06	19195438	64456672	1.79295e+06	2.14945e+06	2.2544e+06	2227835	2694829	5635606
15632304	48	N4-Acetylaminobutanal	C6H11NO2	Metabolism; Amino acid metabolism	Arginine and proline metabolism	5715413	4.56262e+06	2234044	17176228	1.93321e+06	2264704	1.69188e+06	730505	2249374	59632664	49924928	13663829	17757666	1.46492e+06	3.5123e+06	1.6984e+06	855602	8.58806e+06	21505996	15542278	1.30611e+06	17385430	8682992	7352887	21440358	49164572	16463854	3.63039e+06	752746	1.25081e+06	2.0271e+06	2.64161e+06	2.78141e+06	2.63343e+06	4861192	2.63752e+06	19195438	64456672	1.79295e+06	2.14945e+06	2.2544e+06	2227835	2694829	5635606
15632305	48	3-Acetamidobutanal	C6H11NO2	None	None	5715413	4.56262e+06	2234044	17176228	1.93321e+06	2264704	1.69188e+06	730505	2249374	59632664	49924928	13663829	17757666	1.46492e+06	3.5123e+06	1.6984e+06	855602	8.58806e+06	21505996	15542278	1.30611e+06	17385430	8682992	7352887	21440358	49164572	16463854	3.63039e+06	752746	1.25081e+06	2.0271e+06	2.64161e+06	2.78141e+06	2.63343e+06	4861192	2.63752e+06	19195438	64456672	1.79295e+06	2.14945e+06	2.2544e+06	2227835	2694829	5635606
15632308	48	Vigabatrin	C6H11NO2	None	None	5715413	4.56262e+06	2234044	17176228	1.93321e+06	2264704	1.69188e+06	730505	2249374	59632664	49924928	13663829	17757666	1.46492e+06	3.5123e+06	1.6984e+06	855602	8.58806e+06	21505996	15542278	1.30611e+06	17385430	8682992	7352887	21440358	49164572	16463854	3.63039e+06	752746	1.25081e+06	2.0271e+06	2.64161e+06	2.78141e+06	2.63343e+06	4861192	2.63752e+06	19195438	64456672	1.79295e+06	2.14945e+06	2.2544e+06	2227835	2694829	5635606
15632310	48	D-Pipecolic acid	C6H11NO2	None	None	5715413	4.56262e+06	2234044	17176228	1.93321e+06	2264704	1.69188e+06	730505	2249374	59632664	49924928	13663829	17757666	1.46492e+06	3.5123e+06	1.6984e+06	855602	8.58806e+06	21505996	15542278	1.30611e+06	17385430	8682992	7352887	21440358	49164572	16463854	3.63039e+06	752746	1.25081e+06	2.0271e+06	2.64161e+06	2.78141e+06	2.63343e+06	4861192	2.63752e+06	19195438	64456672	1.79295e+06	2.14945e+06	2.2544e+06	2227835	2694829	5635606
15632311	48	L-trans-4-Methyl-2-pyrrolidinecarboxylic acid	C6H11NO2	None	None	5715413	4.56262e+06	2234044	17176228	1.93321e+06	2264704	1.69188e+06	730505	2249374	59632664	49924928	13663829	17757666	1.46492e+06	3.5123e+06	1.6984e+06	855602	8.58806e+06	21505996	15542278	1.30611e+06	17385430	8682992	7352887	21440358	49164572	16463854	3.63039e+06	752746	1.25081e+06	2.0271e+06	2.64161e+06	2.78141e+06	2.63343e+06	4861192	2.63752e+06	19195438	64456672	1.79295e+06	2.14945e+06	2.2544e+06	2227835	2694829	5635606
15632312	48	2-Pyrrolidineacetic acid	C6H11NO2	None	None	5715413	4.56262e+06	2234044	17176228	1.93321e+06	2264704	1.69188e+06	730505	2249374	59632664	49924928	13663829	17757666	1.46492e+06	3.5123e+06	1.6984e+06	855602	8.58806e+06	21505996	15542278	1.30611e+06	17385430	8682992	7352887	21440358	49164572	16463854	3.63039e+06	752746	1.25081e+06	2.0271e+06	2.64161e+06	2.78141e+06	2.63343e+06	4861192	2.63752e+06	19195438	64456672	1.79295e+06	2.14945e+06	2.2544e+06	2227835	2694829	5635606
15632316	48	1-Aminocyclopentanecarboxylate	C6H11NO2	None	None	5715413	4.56262e+06	2234044	17176228	1.93321e+06	2264704	1.69188e+06	730505	2249374	59632664	49924928	13663829	17757666	1.46492e+06	3.5123e+06	1.6984e+06	855602	8.58806e+06	21505996	15542278	1.30611e+06	17385430	8682992	7352887	21440358	49164572	16463854	3.63039e+06	752746	1.25081e+06	2.0271e+06	2.64161e+06	2.78141e+06	2.63343e+06	4861192	2.63752e+06	19195438	64456672	1.79295e+06	2.14945e+06	2.2544e+06	2227835	2694829	5635606
15632320	48	trans-3-Aminocyclopentane-1-carboxylic acid	C6H11NO2	None	None	5715413	4.56262e+06	2234044	17176228	1.93321e+06	2264704	1.69188e+06	730505	2249374	59632664	49924928	13663829	17757666	1.46492e+06	3.5123e+06	1.6984e+06	855602	8.58806e+06	21505996	15542278	1.30611e+06	17385430	8682992	7352887	21440358	49164572	16463854	3.63039e+06	752746	1.25081e+06	2.0271e+06	2.64161e+06	2.78141e+06	2.63343e+06	4861192	2.63752e+06	19195438	64456672	1.79295e+06	2.14945e+06	2.2544e+06	2227835	2694829	5635606
15632360	50	Methoxybrassitin	C12H14N2O2S	None	None	486990	404212	539244	456161	492436	510292	552112	400411	489713	494776	496457	463471	472905	458118	516388	493812	483265	488539	497517	505035	504976	501035	482221	480674	509112	508890	503006	484011	510656	544963	491488	580152	551634	535724	458848	523190	573680	505175	464697	461948	445574	520370	537336	507293
15632363	52	Isoleucyl-Aspartate	C10H18N2O5	None	None	44814.7	56669.3	43095.6	58246.2	57470.2	44269.3	52790.7	41822.9	48802.7	44320.6	50392.6	51221.3	43302.2	70858.7	42660.7	49062.4	36247.4	46691.5	42050.3	59112.2	57526.8	53820	54589.4	82109.3	49483.2	64315.4	56058.1	66918.6	65521.6	44438.8	43594.9	90536.7	47067.4	58666.5	72090.2	62094	56637.9	69126.2	32938	60503.9	55525.9	45472.7	35322.1	33762.2
15632364	52	Leucyl-Aspartate	C10H18N2O5	None	None	44814.7	56669.3	43095.6	58246.2	57470.2	44269.3	52790.7	41822.9	48802.7	44320.6	50392.6	51221.3	43302.2	70858.7	42660.7	49062.4	36247.4	46691.5	42050.3	59112.2	57526.8	53820	54589.4	82109.3	49483.2	64315.4	56058.1	66918.6	65521.6	44438.8	43594.9	90536.7	47067.4	58666.5	72090.2	62094	56637.9	69126.2	32938	60503.9	55525.9	45472.7	35322.1	33762.2
15632365	52	Aspartyl-Leucine	C10H18N2O5	None	None	44814.7	56669.3	43095.6	58246.2	57470.2	44269.3	52790.7	41822.9	48802.7	44320.6	50392.6	51221.3	43302.2	70858.7	42660.7	49062.4	36247.4	46691.5	42050.3	59112.2	57526.8	53820	54589.4	82109.3	49483.2	64315.4	56058.1	66918.6	65521.6	44438.8	43594.9	90536.7	47067.4	58666.5	72090.2	62094	56637.9	69126.2	32938	60503.9	55525.9	45472.7	35322.1	33762.2
15632366	52	Aspartyl-Isoleucine	C10H18N2O5	None	None	44814.7	56669.3	43095.6	58246.2	57470.2	44269.3	52790.7	41822.9	48802.7	44320.6	50392.6	51221.3	43302.2	70858.7	42660.7	49062.4	36247.4	46691.5	42050.3	59112.2	57526.8	53820	54589.4	82109.3	49483.2	64315.4	56058.1	66918.6	65521.6	44438.8	43594.9	90536.7	47067.4	58666.5	72090.2	62094	56637.9	69126.2	32938	60503.9	55525.9	45472.7	35322.1	33762.2
15632367	52	Glu-Val	C10H18N2O5	None	None	44814.7	56669.3	43095.6	58246.2	57470.2	44269.3	52790.7	41822.9	48802.7	44320.6	50392.6	51221.3	43302.2	70858.7	42660.7	49062.4	36247.4	46691.5	42050.3	59112.2	57526.8	53820	54589.4	82109.3	49483.2	64315.4	56058.1	66918.6	65521.6	44438.8	43594.9	90536.7	47067.4	58666.5	72090.2	62094	56637.9	69126.2	32938	60503.9	55525.9	45472.7	35322.1	33762.2
15632368	52	L-beta-aspartyl-L-leucine	C10H18N2O5	None	None	44814.7	56669.3	43095.6	58246.2	57470.2	44269.3	52790.7	41822.9	48802.7	44320.6	50392.6	51221.3	43302.2	70858.7	42660.7	49062.4	36247.4	46691.5	42050.3	59112.2	57526.8	53820	54589.4	82109.3	49483.2	64315.4	56058.1	66918.6	65521.6	44438.8	43594.9	90536.7	47067.4	58666.5	72090.2	62094	56637.9	69126.2	32938	60503.9	55525.9	45472.7	35322.1	33762.2
15632369	52	L-gamma-glutamyl-L-valine	C10H18N2O5	None	None	44814.7	56669.3	43095.6	58246.2	57470.2	44269.3	52790.7	41822.9	48802.7	44320.6	50392.6	51221.3	43302.2	70858.7	42660.7	49062.4	36247.4	46691.5	42050.3	59112.2	57526.8	53820	54589.4	82109.3	49483.2	64315.4	56058.1	66918.6	65521.6	44438.8	43594.9	90536.7	47067.4	58666.5	72090.2	62094	56637.9	69126.2	32938	60503.9	55525.9	45472.7	35322.1	33762.2
15632371	52	2,4-Bis(acetamido)-2,4,6-trideoxy-beta-L-altropyranose	C10H18N2O5	Metabolism; Carbohydrate metabolism	Amino sugar and nucleotide sugar metabolism	44814.7	56669.3	43095.6	58246.2	57470.2	44269.3	52790.7	41822.9	48802.7	44320.6	50392.6	51221.3	43302.2	70858.7	42660.7	49062.4	36247.4	46691.5	42050.3	59112.2	57526.8	53820	54589.4	82109.3	49483.2	64315.4	56058.1	66918.6	65521.6	44438.8	43594.9	90536.7	47067.4	58666.5	72090.2	62094	56637.9	69126.2	32938	60503.9	55525.9	45472.7	35322.1	33762.2
15632372	52	2,4-Diacetamido-2,4,6-trideoxy-D-mannopyranose	C10H18N2O5	None	None	44814.7	56669.3	43095.6	58246.2	57470.2	44269.3	52790.7	41822.9	48802.7	44320.6	50392.6	51221.3	43302.2	70858.7	42660.7	49062.4	36247.4	46691.5	42050.3	59112.2	57526.8	53820	54589.4	82109.3	49483.2	64315.4	56058.1	66918.6	65521.6	44438.8	43594.9	90536.7	47067.4	58666.5	72090.2	62094	56637.9	69126.2	32938	60503.9	55525.9	45472.7	35322.1	33762.2
15632375	53	Trimethylamine N-oxide	C3H9NO	Environmental Information Processing; Signal transduction Metabolism; Energy metabolism	Two-component system Methane metabolism	10772553	7766238	4487847	17084114	15426681	9938530	18979704	16140825	13099617	16281085	12809394	7400474	8415364	16078610	6572837	18972906	15465791	1.41376e+07	24878736	22979596	6.74417e+06	8718883	13363097	27567042	8692012	21961762	1.76624e+07	53871360	9320501	3.91691e+06	13469382	20866528	24932094	17196864	15463125	1.633e+07	6619392	18144496	5985331	5.04231e+06	6679678	5.95249e+06	5695313	22575844
15632376	53	1-Aminopropan-2-ol	C3H9NO	None	None	10772553	7766238	4487847	17084114	15426681	9938530	18979704	16140825	13099617	16281085	12809394	7400474	8415364	16078610	6572837	18972906	15465791	1.41376e+07	24878736	22979596	6.74417e+06	8718883	13363097	27567042	8692012	21961762	1.76624e+07	53871360	9320501	3.91691e+06	13469382	20866528	24932094	17196864	15463125	1.633e+07	6619392	18144496	5985331	5.04231e+06	6679678	5.95249e+06	5695313	22575844
15632377	53	(R)-1-Aminopropan-2-ol	C3H9NO	Metabolism; Amino acid metabolism Metabolism; Metabolism of cofactors and vitamins	Glycine, serine and threonine metabolism Porphyrin and chlorophyll metabolism	10772553	7766238	4487847	17084114	15426681	9938530	18979704	16140825	13099617	16281085	12809394	7400474	8415364	16078610	6572837	18972906	15465791	1.41376e+07	24878736	22979596	6.74417e+06	8718883	13363097	27567042	8692012	21961762	1.76624e+07	53871360	9320501	3.91691e+06	13469382	20866528	24932094	17196864	15463125	1.633e+07	6619392	18144496	5985331	5.04231e+06	6679678	5.95249e+06	5695313	22575844
15632378	54	Nicotinamide	C6H6N2O	Metabolism; Metabolism of cofactors and vitamins Organismal Systems; Digestive system	Nicotinate and nicotinamide metabolism Vitamin digestion and absorption	19767934	29547558	32319612	28745154	30737698	49060476	24671700	20223332	29146356	20040710	33998056	22850296	26690358	28463118	4.13031e+06	28036068	21014682	24770327	18970868	34539460	24946946	34825732	35943088	36227136	30771996	23413270	32655728	18898686	17300742	16159470	25057484	31239846	31603354	29833076	30420694	27445280	17454968	32294608	25911004	21706504	22828774	20164538	21255470	24879678
15632379	54	2-Acetylpyrazine	C6H6N2O	None	None	19767934	29547558	32319612	28745154	30737698	49060476	24671700	20223332	29146356	20040710	33998056	22850296	26690358	28463118	4.13031e+06	28036068	21014682	24770327	18970868	34539460	24946946	34825732	35943088	36227136	30771996	23413270	32655728	18898686	17300742	16159470	25057484	31239846	31603354	29833076	30420694	27445280	17454968	32294608	25911004	21706504	22828774	20164538	21255470	24879678
15632380	54	Picolinamide	C6H6N2O	None	None	19767934	29547558	32319612	28745154	30737698	49060476	24671700	20223332	29146356	20040710	33998056	22850296	26690358	28463118	4.13031e+06	28036068	21014682	24770327	18970868	34539460	24946946	34825732	35943088	36227136	30771996	23413270	32655728	18898686	17300742	16159470	25057484	31239846	31603354	29833076	30420694	27445280	17454968	32294608	25911004	21706504	22828774	20164538	21255470	24879678
15632381	54	Isonicotineamide	C6H6N2O	None	None	19767934	29547558	32319612	28745154	30737698	49060476	24671700	20223332	29146356	20040710	33998056	22850296	26690358	28463118	4.13031e+06	28036068	21014682	24770327	18970868	34539460	24946946	34825732	35943088	36227136	30771996	23413270	32655728	18898686	17300742	16159470	25057484	31239846	31603354	29833076	30420694	27445280	17454968	32294608	25911004	21706504	22828774	20164538	21255470	24879678
15632382	55	L-Valine	C5H11NO2	Metabolism; Amino acid metabolism Metabolism; Metabolism of cofactors and vitamins Metabolism; Metabolism of other amino acids Genetic Information Processing; Translation Metabolism; Amino acid metabolism Metabolism; Biosynthesis of other secondary metabolites Organismal Systems; Digestive system Metabolism; Biosynthesis of other secondary metabolites Metabolism; Carbohydrate metabolism Environme…	Valine, leucine and isoleucine degradation Pantothenate and CoA biosynthesis Cyanoamino acid metabolism Aminoacyl-tRNA biosynthesis Valine, leucine and isoleucine biosynthesis Glucosinolate biosynthesis Protein digestion and absorption Penicillin and cephalosporin biosynthesis Propanoate metabolism ABC transporters Mineral absorption	22026094	29242056	23016536	31482982	38573920	27083996	27342064	34085940	28292060	22349598	31358126	20817562	34421356	40100080	29857736	41805380	23213558	30607931	25384528	36026140	31204960	32879044	25375730	33672288	32182908	29898076	31693934	22532956	29004088	20105504	25703368	37326104	23419406	25062676	31441314	25383022	27765624	28627318	31551300	27647638	21844204	40597184	26355366	28342374
15632401	56	PE-NMe(18:1(9Z)/18:1(9Z))	C42H80NO8P	None	None	34603644	39741744	39746628	39694900	26645220	25497158	27710408	14344623	31157026	38245168	44158092	33936548	30024868	38046248	28738344	28607026	13734089	31980708	16908770	24778294	15104949	27168748	38099192	28391104	31246154	39182544	27779926	35847460	20466262	26277154	26668334	38903964	31091906	22302388	36541320	28880120	25000932	40049468	37128344	27054980	27575096	39758884	38495752	20581168
15632402	56	PE(22:2(13Z,16Z)/15:0)	C42H80NO8P	None	None	34603644	39741744	39746628	39694900	26645220	25497158	27710408	14344623	31157026	38245168	44158092	33936548	30024868	38046248	28738344	28607026	13734089	31980708	16908770	24778294	15104949	27168748	38099192	28391104	31246154	39182544	27779926	35847460	20466262	26277154	26668334	38903964	31091906	22302388	36541320	28880120	25000932	40049468	37128344	27054980	27575096	39758884	38495752	20581168
15632403	56	PE(15:0/22:2(13Z,16Z))	C42H80NO8P	None	None	34603644	39741744	39746628	39694900	26645220	25497158	27710408	14344623	31157026	38245168	44158092	33936548	30024868	38046248	28738344	28607026	13734089	31980708	16908770	24778294	15104949	27168748	38099192	28391104	31246154	39182544	27779926	35847460	20466262	26277154	26668334	38903964	31091906	22302388	36541320	28880120	25000932	40049468	37128344	27054980	27575096	39758884	38495752	20581168
15632411	56	PC(20:2(11Z,14Z)/14:0)	C42H80NO8P	None	None	34603644	39741744	39746628	39694900	26645220	25497158	27710408	14344623	31157026	38245168	44158092	33936548	30024868	38046248	28738344	28607026	13734089	31980708	16908770	24778294	15104949	27168748	38099192	28391104	31246154	39182544	27779926	35847460	20466262	26277154	26668334	38903964	31091906	22302388	36541320	28880120	25000932	40049468	37128344	27054980	27575096	39758884	38495752	20581168
15632412	56	PC(16:1(9Z)/18:1(9Z))	C42H80NO8P	None	None	34603644	39741744	39746628	39694900	26645220	25497158	27710408	14344623	31157026	38245168	44158092	33936548	30024868	38046248	28738344	28607026	13734089	31980708	16908770	24778294	15104949	27168748	38099192	28391104	31246154	39182544	27779926	35847460	20466262	26277154	26668334	38903964	31091906	22302388	36541320	28880120	25000932	40049468	37128344	27054980	27575096	39758884	38495752	20581168
15632413	56	PC(16:1(9Z)/18:1(11Z))	C42H80NO8P	None	None	34603644	39741744	39746628	39694900	26645220	25497158	27710408	14344623	31157026	38245168	44158092	33936548	30024868	38046248	28738344	28607026	13734089	31980708	16908770	24778294	15104949	27168748	38099192	28391104	31246154	39182544	27779926	35847460	20466262	26277154	26668334	38903964	31091906	22302388	36541320	28880120	25000932	40049468	37128344	27054980	27575096	39758884	38495752	20581168
15632414	56	PC(18:1(11Z)/16:1(9Z))	C42H80NO8P	None	None	34603644	39741744	39746628	39694900	26645220	25497158	27710408	14344623	31157026	38245168	44158092	33936548	30024868	38046248	28738344	28607026	13734089	31980708	16908770	24778294	15104949	27168748	38099192	28391104	31246154	39182544	27779926	35847460	20466262	26277154	26668334	38903964	31091906	22302388	36541320	28880120	25000932	40049468	37128344	27054980	27575096	39758884	38495752	20581168
15632415	56	PC(18:2(9Z,12Z)/16:0)	C42H80NO8P	None	None	34603644	39741744	39746628	39694900	26645220	25497158	27710408	14344623	31157026	38245168	44158092	33936548	30024868	38046248	28738344	28607026	13734089	31980708	16908770	24778294	15104949	27168748	38099192	28391104	31246154	39182544	27779926	35847460	20466262	26277154	26668334	38903964	31091906	22302388	36541320	28880120	25000932	40049468	37128344	27054980	27575096	39758884	38495752	20581168
15632416	56	PC(18:1(9Z)/16:1(9Z))	C42H80NO8P	None	None	34603644	39741744	39746628	39694900	26645220	25497158	27710408	14344623	31157026	38245168	44158092	33936548	30024868	38046248	28738344	28607026	13734089	31980708	16908770	24778294	15104949	27168748	38099192	28391104	31246154	39182544	27779926	35847460	20466262	26277154	26668334	38903964	31091906	22302388	36541320	28880120	25000932	40049468	37128344	27054980	27575096	39758884	38495752	20581168
15632417	56	PC(20:1(11Z)/14:1(9Z))	C42H80NO8P	None	None	34603644	39741744	39746628	39694900	26645220	25497158	27710408	14344623	31157026	38245168	44158092	33936548	30024868	38046248	28738344	28607026	13734089	31980708	16908770	24778294	15104949	27168748	38099192	28391104	31246154	39182544	27779926	35847460	20466262	26277154	26668334	38903964	31091906	22302388	36541320	28880120	25000932	40049468	37128344	27054980	27575096	39758884	38495752	20581168
15632418	56	PC(14:1(9Z)/20:1(11Z))	C42H80NO8P	None	None	34603644	39741744	39746628	39694900	26645220	25497158	27710408	14344623	31157026	38245168	44158092	33936548	30024868	38046248	28738344	28607026	13734089	31980708	16908770	24778294	15104949	27168748	38099192	28391104	31246154	39182544	27779926	35847460	20466262	26277154	26668334	38903964	31091906	22302388	36541320	28880120	25000932	40049468	37128344	27054980	27575096	39758884	38495752	20581168
15632419	56	PC(16:0/18:2(9Z,12Z))	C42H80NO8P	None	None	34603644	39741744	39746628	39694900	26645220	25497158	27710408	14344623	31157026	38245168	44158092	33936548	30024868	38046248	28738344	28607026	13734089	31980708	16908770	24778294	15104949	27168748	38099192	28391104	31246154	39182544	27779926	35847460	20466262	26277154	26668334	38903964	31091906	22302388	36541320	28880120	25000932	40049468	37128344	27054980	27575096	39758884	38495752	20581168
15632429	56	PC(14:0/20:2(11Z,14Z))	C42H80NO8P	None	None	34603644	39741744	39746628	39694900	26645220	25497158	27710408	14344623	31157026	38245168	44158092	33936548	30024868	38046248	28738344	28607026	13734089	31980708	16908770	24778294	15104949	27168748	38099192	28391104	31246154	39182544	27779926	35847460	20466262	26277154	26668334	38903964	31091906	22302388	36541320	28880120	25000932	40049468	37128344	27054980	27575096	39758884	38495752	20581168
15632445	56	PE(22:1(11Z)/15:1(9Z))	C42H80NO8P	None	None	34603644	39741744	39746628	39694900	26645220	25497158	27710408	14344623	31157026	38245168	44158092	33936548	30024868	38046248	28738344	28607026	13734089	31980708	16908770	24778294	15104949	27168748	38099192	28391104	31246154	39182544	27779926	35847460	20466262	26277154	26668334	38903964	31091906	22302388	36541320	28880120	25000932	40049468	37128344	27054980	27575096	39758884	38495752	20581168
15632446	56	PC(22:2(13Z,16Z)/12:0)	C42H80NO8P	None	None	34603644	39741744	39746628	39694900	26645220	25497158	27710408	14344623	31157026	38245168	44158092	33936548	30024868	38046248	28738344	28607026	13734089	31980708	16908770	24778294	15104949	27168748	38099192	28391104	31246154	39182544	27779926	35847460	20466262	26277154	26668334	38903964	31091906	22302388	36541320	28880120	25000932	40049468	37128344	27054980	27575096	39758884	38495752	20581168
15632447	56	PC(17:1(9Z)/17:1(9Z))	C42H80NO8P	None	None	34603644	39741744	39746628	39694900	26645220	25497158	27710408	14344623	31157026	38245168	44158092	33936548	30024868	38046248	28738344	28607026	13734089	31980708	16908770	24778294	15104949	27168748	38099192	28391104	31246154	39182544	27779926	35847460	20466262	26277154	26668334	38903964	31091906	22302388	36541320	28880120	25000932	40049468	37128344	27054980	27575096	39758884	38495752	20581168
15632448	56	PC(17:1(10Z)/17:1(10Z))	C42H80NO8P	None	None	34603644	39741744	39746628	39694900	26645220	25497158	27710408	14344623	31157026	38245168	44158092	33936548	30024868	38046248	28738344	28607026	13734089	31980708	16908770	24778294	15104949	27168748	38099192	28391104	31246154	39182544	27779926	35847460	20466262	26277154	26668334	38903964	31091906	22302388	36541320	28880120	25000932	40049468	37128344	27054980	27575096	39758884	38495752	20581168
15632449	56	PC(18:0/16:2(2E,4E))	C42H80NO8P	None	None	34603644	39741744	39746628	39694900	26645220	25497158	27710408	14344623	31157026	38245168	44158092	33936548	30024868	38046248	28738344	28607026	13734089	31980708	16908770	24778294	15104949	27168748	38099192	28391104	31246154	39182544	27779926	35847460	20466262	26277154	26668334	38903964	31091906	22302388	36541320	28880120	25000932	40049468	37128344	27054980	27575096	39758884	38495752	20581168
15632450	56	PC(18:2(2E,4E)/16:0)	C42H80NO8P	None	None	34603644	39741744	39746628	39694900	26645220	25497158	27710408	14344623	31157026	38245168	44158092	33936548	30024868	38046248	28738344	28607026	13734089	31980708	16908770	24778294	15104949	27168748	38099192	28391104	31246154	39182544	27779926	35847460	20466262	26277154	26668334	38903964	31091906	22302388	36541320	28880120	25000932	40049468	37128344	27054980	27575096	39758884	38495752	20581168
15632451	56	PC(18:2(6Z,9Z)/16:0)	C42H80NO8P	None	None	34603644	39741744	39746628	39694900	26645220	25497158	27710408	14344623	31157026	38245168	44158092	33936548	30024868	38046248	28738344	28607026	13734089	31980708	16908770	24778294	15104949	27168748	38099192	28391104	31246154	39182544	27779926	35847460	20466262	26277154	26668334	38903964	31091906	22302388	36541320	28880120	25000932	40049468	37128344	27054980	27575096	39758884	38495752	20581168
15632452	56	PC(16:1(2Z)/18:1(9Z))	C42H80NO8P	None	None	34603644	39741744	39746628	39694900	26645220	25497158	27710408	14344623	31157026	38245168	44158092	33936548	30024868	38046248	28738344	28607026	13734089	31980708	16908770	24778294	15104949	27168748	38099192	28391104	31246154	39182544	27779926	35847460	20466262	26277154	26668334	38903964	31091906	22302388	36541320	28880120	25000932	40049468	37128344	27054980	27575096	39758884	38495752	20581168
15632453	56	PC(16:0/18:2(9E,12E))	C42H80NO8P	None	None	34603644	39741744	39746628	39694900	26645220	25497158	27710408	14344623	31157026	38245168	44158092	33936548	30024868	38046248	28738344	28607026	13734089	31980708	16908770	24778294	15104949	27168748	38099192	28391104	31246154	39182544	27779926	35847460	20466262	26277154	26668334	38903964	31091906	22302388	36541320	28880120	25000932	40049468	37128344	27054980	27575096	39758884	38495752	20581168
15632454	56	PC(16:0/18:2(9E,11Z))	C42H80NO8P	None	None	34603644	39741744	39746628	39694900	26645220	25497158	27710408	14344623	31157026	38245168	44158092	33936548	30024868	38046248	28738344	28607026	13734089	31980708	16908770	24778294	15104949	27168748	38099192	28391104	31246154	39182544	27779926	35847460	20466262	26277154	26668334	38903964	31091906	22302388	36541320	28880120	25000932	40049468	37128344	27054980	27575096	39758884	38495752	20581168
15632455	56	PC(16:0/18:2(9E,11E))	C42H80NO8P	None	None	34603644	39741744	39746628	39694900	26645220	25497158	27710408	14344623	31157026	38245168	44158092	33936548	30024868	38046248	28738344	28607026	13734089	31980708	16908770	24778294	15104949	27168748	38099192	28391104	31246154	39182544	27779926	35847460	20466262	26277154	26668334	38903964	31091906	22302388	36541320	28880120	25000932	40049468	37128344	27054980	27575096	39758884	38495752	20581168
15632456	56	PC(16:0/18:2(11Z,13Z))	C42H80NO8P	None	None	34603644	39741744	39746628	39694900	26645220	25497158	27710408	14344623	31157026	38245168	44158092	33936548	30024868	38046248	28738344	28607026	13734089	31980708	16908770	24778294	15104949	27168748	38099192	28391104	31246154	39182544	27779926	35847460	20466262	26277154	26668334	38903964	31091906	22302388	36541320	28880120	25000932	40049468	37128344	27054980	27575096	39758884	38495752	20581168
15632457	56	PC(16:0/18:2(10E,12Z))	C42H80NO8P	None	None	34603644	39741744	39746628	39694900	26645220	25497158	27710408	14344623	31157026	38245168	44158092	33936548	30024868	38046248	28738344	28607026	13734089	31980708	16908770	24778294	15104949	27168748	38099192	28391104	31246154	39182544	27779926	35847460	20466262	26277154	26668334	38903964	31091906	22302388	36541320	28880120	25000932	40049468	37128344	27054980	27575096	39758884	38495752	20581168
15632458	56	PC(16:0/18:2(6Z,9Z))	C42H80NO8P	None	None	34603644	39741744	39746628	39694900	26645220	25497158	27710408	14344623	31157026	38245168	44158092	33936548	30024868	38046248	28738344	28607026	13734089	31980708	16908770	24778294	15104949	27168748	38099192	28391104	31246154	39182544	27779926	35847460	20466262	26277154	26668334	38903964	31091906	22302388	36541320	28880120	25000932	40049468	37128344	27054980	27575096	39758884	38495752	20581168
15632459	56	PC(16:0/18:2(2Z,4Z))	C42H80NO8P	None	None	34603644	39741744	39746628	39694900	26645220	25497158	27710408	14344623	31157026	38245168	44158092	33936548	30024868	38046248	28738344	28607026	13734089	31980708	16908770	24778294	15104949	27168748	38099192	28391104	31246154	39182544	27779926	35847460	20466262	26277154	26668334	38903964	31091906	22302388	36541320	28880120	25000932	40049468	37128344	27054980	27575096	39758884	38495752	20581168
15632460	56	PC(16:0/18:2(2E,4E))	C42H80NO8P	None	None	34603644	39741744	39746628	39694900	26645220	25497158	27710408	14344623	31157026	38245168	44158092	33936548	30024868	38046248	28738344	28607026	13734089	31980708	16908770	24778294	15104949	27168748	38099192	28391104	31246154	39182544	27779926	35847460	20466262	26277154	26668334	38903964	31091906	22302388	36541320	28880120	25000932	40049468	37128344	27054980	27575096	39758884	38495752	20581168
15632461	56	PC(12:0/22:2(13Z,16Z))	C42H80NO8P	None	None	34603644	39741744	39746628	39694900	26645220	25497158	27710408	14344623	31157026	38245168	44158092	33936548	30024868	38046248	28738344	28607026	13734089	31980708	16908770	24778294	15104949	27168748	38099192	28391104	31246154	39182544	27779926	35847460	20466262	26277154	26668334	38903964	31091906	22302388	36541320	28880120	25000932	40049468	37128344	27054980	27575096	39758884	38495752	20581168
15632462	56	PC(17:0/17:2(9Z,12Z))	C42H80NO8P	None	None	34603644	39741744	39746628	39694900	26645220	25497158	27710408	14344623	31157026	38245168	44158092	33936548	30024868	38046248	28738344	28607026	13734089	31980708	16908770	24778294	15104949	27168748	38099192	28391104	31246154	39182544	27779926	35847460	20466262	26277154	26668334	38903964	31091906	22302388	36541320	28880120	25000932	40049468	37128344	27054980	27575096	39758884	38495752	20581168
15632463	56	PC(17:2(9Z,12Z)/17:0)	C42H80NO8P	None	None	34603644	39741744	39746628	39694900	26645220	25497158	27710408	14344623	31157026	38245168	44158092	33936548	30024868	38046248	28738344	28607026	13734089	31980708	16908770	24778294	15104949	27168748	38099192	28391104	31246154	39182544	27779926	35847460	20466262	26277154	26668334	38903964	31091906	22302388	36541320	28880120	25000932	40049468	37128344	27054980	27575096	39758884	38495752	20581168
15632464	56	PC(15:1(9Z)/19:1(9Z))	C42H80NO8P	None	None	34603644	39741744	39746628	39694900	26645220	25497158	27710408	14344623	31157026	38245168	44158092	33936548	30024868	38046248	28738344	28607026	13734089	31980708	16908770	24778294	15104949	27168748	38099192	28391104	31246154	39182544	27779926	35847460	20466262	26277154	26668334	38903964	31091906	22302388	36541320	28880120	25000932	40049468	37128344	27054980	27575096	39758884	38495752	20581168
15632465	56	PE-NMe(18:1(9E)/18:1(9E))	C42H80NO8P	None	None	34603644	39741744	39746628	39694900	26645220	25497158	27710408	14344623	31157026	38245168	44158092	33936548	30024868	38046248	28738344	28607026	13734089	31980708	16908770	24778294	15104949	27168748	38099192	28391104	31246154	39182544	27779926	35847460	20466262	26277154	26668334	38903964	31091906	22302388	36541320	28880120	25000932	40049468	37128344	27054980	27575096	39758884	38495752	20581168
15632466	56	PE(18:1(9Z)/19:1(9Z))	C42H80NO8P	None	None	34603644	39741744	39746628	39694900	26645220	25497158	27710408	14344623	31157026	38245168	44158092	33936548	30024868	38046248	28738344	28607026	13734089	31980708	16908770	24778294	15104949	27168748	38099192	28391104	31246154	39182544	27779926	35847460	20466262	26277154	26668334	38903964	31091906	22302388	36541320	28880120	25000932	40049468	37128344	27054980	27575096	39758884	38495752	20581168
15632467	56	PE(18:2(9Z,12Z)/19:0)	C42H80NO8P	None	None	34603644	39741744	39746628	39694900	26645220	25497158	27710408	14344623	31157026	38245168	44158092	33936548	30024868	38046248	28738344	28607026	13734089	31980708	16908770	24778294	15104949	27168748	38099192	28391104	31246154	39182544	27779926	35847460	20466262	26277154	26668334	38903964	31091906	22302388	36541320	28880120	25000932	40049468	37128344	27054980	27575096	39758884	38495752	20581168
15632468	56	PE(17:2(9Z,12Z)/20:0)	C42H80NO8P	None	None	34603644	39741744	39746628	39694900	26645220	25497158	27710408	14344623	31157026	38245168	44158092	33936548	30024868	38046248	28738344	28607026	13734089	31980708	16908770	24778294	15104949	27168748	38099192	28391104	31246154	39182544	27779926	35847460	20466262	26277154	26668334	38903964	31091906	22302388	36541320	28880120	25000932	40049468	37128344	27054980	27575096	39758884	38495752	20581168
15632469	56	PE(19:0/18:2(9Z,12Z))	C42H80NO8P	None	None	34603644	39741744	39746628	39694900	26645220	25497158	27710408	14344623	31157026	38245168	44158092	33936548	30024868	38046248	28738344	28607026	13734089	31980708	16908770	24778294	15104949	27168748	38099192	28391104	31246154	39182544	27779926	35847460	20466262	26277154	26668334	38903964	31091906	22302388	36541320	28880120	25000932	40049468	37128344	27054980	27575096	39758884	38495752	20581168
15632470	56	PE(17:0/20:2(11Z,14Z))	C42H80NO8P	None	None	34603644	39741744	39746628	39694900	26645220	25497158	27710408	14344623	31157026	38245168	44158092	33936548	30024868	38046248	28738344	28607026	13734089	31980708	16908770	24778294	15104949	27168748	38099192	28391104	31246154	39182544	27779926	35847460	20466262	26277154	26668334	38903964	31091906	22302388	36541320	28880120	25000932	40049468	37128344	27054980	27575096	39758884	38495752	20581168
15632471	56	PE(17:1(9Z)/20:1(11Z))	C42H80NO8P	None	None	34603644	39741744	39746628	39694900	26645220	25497158	27710408	14344623	31157026	38245168	44158092	33936548	30024868	38046248	28738344	28607026	13734089	31980708	16908770	24778294	15104949	27168748	38099192	28391104	31246154	39182544	27779926	35847460	20466262	26277154	26668334	38903964	31091906	22302388	36541320	28880120	25000932	40049468	37128344	27054980	27575096	39758884	38495752	20581168
15632472	56	PE(15:1(9Z)/22:1(11Z))	C42H80NO8P	None	None	34603644	39741744	39746628	39694900	26645220	25497158	27710408	14344623	31157026	38245168	44158092	33936548	30024868	38046248	28738344	28607026	13734089	31980708	16908770	24778294	15104949	27168748	38099192	28391104	31246154	39182544	27779926	35847460	20466262	26277154	26668334	38903964	31091906	22302388	36541320	28880120	25000932	40049468	37128344	27054980	27575096	39758884	38495752	20581168
15632473	56	PC(19:1(9Z)/15:1(9Z))	C42H80NO8P	None	None	34603644	39741744	39746628	39694900	26645220	25497158	27710408	14344623	31157026	38245168	44158092	33936548	30024868	38046248	28738344	28607026	13734089	31980708	16908770	24778294	15104949	27168748	38099192	28391104	31246154	39182544	27779926	35847460	20466262	26277154	26668334	38903964	31091906	22302388	36541320	28880120	25000932	40049468	37128344	27054980	27575096	39758884	38495752	20581168
15632474	56	PE(20:2(11Z,14Z)/17:0)	C42H80NO8P	None	None	34603644	39741744	39746628	39694900	26645220	25497158	27710408	14344623	31157026	38245168	44158092	33936548	30024868	38046248	28738344	28607026	13734089	31980708	16908770	24778294	15104949	27168748	38099192	28391104	31246154	39182544	27779926	35847460	20466262	26277154	26668334	38903964	31091906	22302388	36541320	28880120	25000932	40049468	37128344	27054980	27575096	39758884	38495752	20581168
15632475	56	PE(19:1(9Z)/18:1(9Z))	C42H80NO8P	None	None	34603644	39741744	39746628	39694900	26645220	25497158	27710408	14344623	31157026	38245168	44158092	33936548	30024868	38046248	28738344	28607026	13734089	31980708	16908770	24778294	15104949	27168748	38099192	28391104	31246154	39182544	27779926	35847460	20466262	26277154	26668334	38903964	31091906	22302388	36541320	28880120	25000932	40049468	37128344	27054980	27575096	39758884	38495752	20581168
15632476	56	PE(20:0/17:2(9Z,12Z))	C42H80NO8P	None	None	34603644	39741744	39746628	39694900	26645220	25497158	27710408	14344623	31157026	38245168	44158092	33936548	30024868	38046248	28738344	28607026	13734089	31980708	16908770	24778294	15104949	27168748	38099192	28391104	31246154	39182544	27779926	35847460	20466262	26277154	26668334	38903964	31091906	22302388	36541320	28880120	25000932	40049468	37128344	27054980	27575096	39758884	38495752	20581168
15632477	56	PE(20:1(11Z)/17:1(9Z))	C42H80NO8P	None	None	34603644	39741744	39746628	39694900	26645220	25497158	27710408	14344623	31157026	38245168	44158092	33936548	30024868	38046248	28738344	28607026	13734089	31980708	16908770	24778294	15104949	27168748	38099192	28391104	31246154	39182544	27779926	35847460	20466262	26277154	26668334	38903964	31091906	22302388	36541320	28880120	25000932	40049468	37128344	27054980	27575096	39758884	38495752	20581168
15632482	57	PC(20:3(5Z,8Z,11Z)/16:1(9Z))	C44H80NO8P	None	None	4921345	5911650	5.75638e+06	6.15855e+06	4.86565e+06	3.63537e+06	4.05069e+06	3401234	4.8935e+06	5170113	6.31392e+06	5236592	4828755	7461500	8321023	4.06534e+06	3064549	5.20335e+06	2.5552e+06	3562416	2.43017e+06	4.1528e+06	5.0399e+06	5.82172e+06	4797217	6132694	4.47501e+06	4730979	2.89782e+06	4.17827e+06	3.61883e+06	6713159	4526240	4287269	5805944	4.40675e+06	5421101	7.12878e+06	6301385	5263369	5.08884e+06	6.07889e+06	5883872	5.41086e+06
15632483	57	PC(20:3(8Z,11Z,14Z)/16:1(9Z))	C44H80NO8P	None	None	4921345	5911650	5.75638e+06	6.15855e+06	4.86565e+06	3.63537e+06	4.05069e+06	3401234	4.8935e+06	5170113	6.31392e+06	5236592	4828755	7461500	8321023	4.06534e+06	3064549	5.20335e+06	2.5552e+06	3562416	2.43017e+06	4.1528e+06	5.0399e+06	5.82172e+06	4797217	6132694	4.47501e+06	4730979	2.89782e+06	4.17827e+06	3.61883e+06	6713159	4526240	4287269	5805944	4.40675e+06	5421101	7.12878e+06	6301385	5263369	5.08884e+06	6.07889e+06	5883872	5.41086e+06
15632484	57	PC(20:4(5Z,8Z,11Z,14Z)/16:0)	C44H80NO8P	None	None	4921345	5911650	5.75638e+06	6.15855e+06	4.86565e+06	3.63537e+06	4.05069e+06	3401234	4.8935e+06	5170113	6.31392e+06	5236592	4828755	7461500	8321023	4.06534e+06	3064549	5.20335e+06	2.5552e+06	3562416	2.43017e+06	4.1528e+06	5.0399e+06	5.82172e+06	4797217	6132694	4.47501e+06	4730979	2.89782e+06	4.17827e+06	3.61883e+06	6713159	4526240	4287269	5805944	4.40675e+06	5421101	7.12878e+06	6301385	5263369	5.08884e+06	6.07889e+06	5883872	5.41086e+06
15632485	57	PC(20:4(8Z,11Z,14Z,17Z)/16:0)	C44H80NO8P	None	None	4921345	5911650	5.75638e+06	6.15855e+06	4.86565e+06	3.63537e+06	4.05069e+06	3401234	4.8935e+06	5170113	6.31392e+06	5236592	4828755	7461500	8321023	4.06534e+06	3064549	5.20335e+06	2.5552e+06	3562416	2.43017e+06	4.1528e+06	5.0399e+06	5.82172e+06	4797217	6132694	4.47501e+06	4730979	2.89782e+06	4.17827e+06	3.61883e+06	6713159	4526240	4287269	5805944	4.40675e+06	5421101	7.12878e+06	6301385	5263369	5.08884e+06	6.07889e+06	5883872	5.41086e+06
15632486	57	PC(22:4(7Z,10Z,13Z,16Z)/14:0)	C44H80NO8P	None	None	4921345	5911650	5.75638e+06	6.15855e+06	4.86565e+06	3.63537e+06	4.05069e+06	3401234	4.8935e+06	5170113	6.31392e+06	5236592	4828755	7461500	8321023	4.06534e+06	3064549	5.20335e+06	2.5552e+06	3562416	2.43017e+06	4.1528e+06	5.0399e+06	5.82172e+06	4797217	6132694	4.47501e+06	4730979	2.89782e+06	4.17827e+06	3.61883e+06	6713159	4526240	4287269	5805944	4.40675e+06	5421101	7.12878e+06	6301385	5263369	5.08884e+06	6.07889e+06	5883872	5.41086e+06
15632487	57	PC(16:1(9Z)/20:3(8Z,11Z,14Z))	C44H80NO8P	None	None	4921345	5911650	5.75638e+06	6.15855e+06	4.86565e+06	3.63537e+06	4.05069e+06	3401234	4.8935e+06	5170113	6.31392e+06	5236592	4828755	7461500	8321023	4.06534e+06	3064549	5.20335e+06	2.5552e+06	3562416	2.43017e+06	4.1528e+06	5.0399e+06	5.82172e+06	4797217	6132694	4.47501e+06	4730979	2.89782e+06	4.17827e+06	3.61883e+06	6713159	4526240	4287269	5805944	4.40675e+06	5421101	7.12878e+06	6301385	5263369	5.08884e+06	6.07889e+06	5883872	5.41086e+06
15632488	57	PC(16:1(9Z)/20:3(5Z,8Z,11Z))	C44H80NO8P	None	None	4921345	5911650	5.75638e+06	6.15855e+06	4.86565e+06	3.63537e+06	4.05069e+06	3401234	4.8935e+06	5170113	6.31392e+06	5236592	4828755	7461500	8321023	4.06534e+06	3064549	5.20335e+06	2.5552e+06	3562416	2.43017e+06	4.1528e+06	5.0399e+06	5.82172e+06	4797217	6132694	4.47501e+06	4730979	2.89782e+06	4.17827e+06	3.61883e+06	6713159	4526240	4287269	5805944	4.40675e+06	5421101	7.12878e+06	6301385	5263369	5.08884e+06	6.07889e+06	5883872	5.41086e+06
15632490	57	PC(18:0/18:4(6Z,9Z,12Z,15Z))	C44H80NO8P	None	None	4921345	5911650	5.75638e+06	6.15855e+06	4.86565e+06	3.63537e+06	4.05069e+06	3401234	4.8935e+06	5170113	6.31392e+06	5236592	4828755	7461500	8321023	4.06534e+06	3064549	5.20335e+06	2.5552e+06	3562416	2.43017e+06	4.1528e+06	5.0399e+06	5.82172e+06	4797217	6132694	4.47501e+06	4730979	2.89782e+06	4.17827e+06	3.61883e+06	6713159	4526240	4287269	5805944	4.40675e+06	5421101	7.12878e+06	6301385	5263369	5.08884e+06	6.07889e+06	5883872	5.41086e+06
15632492	57	PC(18:1(11Z)/18:3(9Z,12Z,15Z))	C44H80NO8P	None	None	4921345	5911650	5.75638e+06	6.15855e+06	4.86565e+06	3.63537e+06	4.05069e+06	3401234	4.8935e+06	5170113	6.31392e+06	5236592	4828755	7461500	8321023	4.06534e+06	3064549	5.20335e+06	2.5552e+06	3562416	2.43017e+06	4.1528e+06	5.0399e+06	5.82172e+06	4797217	6132694	4.47501e+06	4730979	2.89782e+06	4.17827e+06	3.61883e+06	6713159	4526240	4287269	5805944	4.40675e+06	5421101	7.12878e+06	6301385	5263369	5.08884e+06	6.07889e+06	5883872	5.41086e+06
15632493	57	PC(18:1(11Z)/18:3(6Z,9Z,12Z))	C44H80NO8P	None	None	4921345	5911650	5.75638e+06	6.15855e+06	4.86565e+06	3.63537e+06	4.05069e+06	3401234	4.8935e+06	5170113	6.31392e+06	5236592	4828755	7461500	8321023	4.06534e+06	3064549	5.20335e+06	2.5552e+06	3562416	2.43017e+06	4.1528e+06	5.0399e+06	5.82172e+06	4797217	6132694	4.47501e+06	4730979	2.89782e+06	4.17827e+06	3.61883e+06	6713159	4526240	4287269	5805944	4.40675e+06	5421101	7.12878e+06	6301385	5263369	5.08884e+06	6.07889e+06	5883872	5.41086e+06
15632495	57	PC(18:2(9Z,12Z)/18:2(9Z,12Z))	C44H80NO8P	None	None	4921345	5911650	5.75638e+06	6.15855e+06	4.86565e+06	3.63537e+06	4.05069e+06	3401234	4.8935e+06	5170113	6.31392e+06	5236592	4828755	7461500	8321023	4.06534e+06	3064549	5.20335e+06	2.5552e+06	3562416	2.43017e+06	4.1528e+06	5.0399e+06	5.82172e+06	4797217	6132694	4.47501e+06	4730979	2.89782e+06	4.17827e+06	3.61883e+06	6713159	4526240	4287269	5805944	4.40675e+06	5421101	7.12878e+06	6301385	5263369	5.08884e+06	6.07889e+06	5883872	5.41086e+06
15632496	57	PC(18:1(9Z)/18:3(9Z,12Z,15Z))	C44H80NO8P	None	None	4921345	5911650	5.75638e+06	6.15855e+06	4.86565e+06	3.63537e+06	4.05069e+06	3401234	4.8935e+06	5170113	6.31392e+06	5236592	4828755	7461500	8321023	4.06534e+06	3064549	5.20335e+06	2.5552e+06	3562416	2.43017e+06	4.1528e+06	5.0399e+06	5.82172e+06	4797217	6132694	4.47501e+06	4730979	2.89782e+06	4.17827e+06	3.61883e+06	6713159	4526240	4287269	5805944	4.40675e+06	5421101	7.12878e+06	6301385	5263369	5.08884e+06	6.07889e+06	5883872	5.41086e+06
15632497	57	PC(18:1(9Z)/18:3(6Z,9Z,12Z))	C44H80NO8P	None	None	4921345	5911650	5.75638e+06	6.15855e+06	4.86565e+06	3.63537e+06	4.05069e+06	3401234	4.8935e+06	5170113	6.31392e+06	5236592	4828755	7461500	8321023	4.06534e+06	3064549	5.20335e+06	2.5552e+06	3562416	2.43017e+06	4.1528e+06	5.0399e+06	5.82172e+06	4797217	6132694	4.47501e+06	4730979	2.89782e+06	4.17827e+06	3.61883e+06	6713159	4526240	4287269	5805944	4.40675e+06	5421101	7.12878e+06	6301385	5263369	5.08884e+06	6.07889e+06	5883872	5.41086e+06
15632499	57	PC(18:3(6Z,9Z,12Z)/18:1(9Z))	C44H80NO8P	None	None	4921345	5911650	5.75638e+06	6.15855e+06	4.86565e+06	3.63537e+06	4.05069e+06	3401234	4.8935e+06	5170113	6.31392e+06	5236592	4828755	7461500	8321023	4.06534e+06	3064549	5.20335e+06	2.5552e+06	3562416	2.43017e+06	4.1528e+06	5.0399e+06	5.82172e+06	4797217	6132694	4.47501e+06	4730979	2.89782e+06	4.17827e+06	3.61883e+06	6713159	4526240	4287269	5805944	4.40675e+06	5421101	7.12878e+06	6301385	5263369	5.08884e+06	6.07889e+06	5883872	5.41086e+06
15632500	57	PC(18:3(6Z,9Z,12Z)/18:1(11Z))	C44H80NO8P	None	None	4921345	5911650	5.75638e+06	6.15855e+06	4.86565e+06	3.63537e+06	4.05069e+06	3401234	4.8935e+06	5170113	6.31392e+06	5236592	4828755	7461500	8321023	4.06534e+06	3064549	5.20335e+06	2.5552e+06	3562416	2.43017e+06	4.1528e+06	5.0399e+06	5.82172e+06	4797217	6132694	4.47501e+06	4730979	2.89782e+06	4.17827e+06	3.61883e+06	6713159	4526240	4287269	5805944	4.40675e+06	5421101	7.12878e+06	6301385	5263369	5.08884e+06	6.07889e+06	5883872	5.41086e+06
15632501	57	PC(18:3(9Z,12Z,15Z)/18:1(9Z))	C44H80NO8P	None	None	4921345	5911650	5.75638e+06	6.15855e+06	4.86565e+06	3.63537e+06	4.05069e+06	3401234	4.8935e+06	5170113	6.31392e+06	5236592	4828755	7461500	8321023	4.06534e+06	3064549	5.20335e+06	2.5552e+06	3562416	2.43017e+06	4.1528e+06	5.0399e+06	5.82172e+06	4797217	6132694	4.47501e+06	4730979	2.89782e+06	4.17827e+06	3.61883e+06	6713159	4526240	4287269	5805944	4.40675e+06	5421101	7.12878e+06	6301385	5263369	5.08884e+06	6.07889e+06	5883872	5.41086e+06
15632502	57	PC(18:3(9Z,12Z,15Z)/18:1(11Z))	C44H80NO8P	None	None	4921345	5911650	5.75638e+06	6.15855e+06	4.86565e+06	3.63537e+06	4.05069e+06	3401234	4.8935e+06	5170113	6.31392e+06	5236592	4828755	7461500	8321023	4.06534e+06	3064549	5.20335e+06	2.5552e+06	3562416	2.43017e+06	4.1528e+06	5.0399e+06	5.82172e+06	4797217	6132694	4.47501e+06	4730979	2.89782e+06	4.17827e+06	3.61883e+06	6713159	4526240	4287269	5805944	4.40675e+06	5421101	7.12878e+06	6301385	5263369	5.08884e+06	6.07889e+06	5883872	5.41086e+06
15632503	57	PC(18:4(6Z,9Z,12Z,15Z)/18:0)	C44H80NO8P	None	None	4921345	5911650	5.75638e+06	6.15855e+06	4.86565e+06	3.63537e+06	4.05069e+06	3401234	4.8935e+06	5170113	6.31392e+06	5236592	4828755	7461500	8321023	4.06534e+06	3064549	5.20335e+06	2.5552e+06	3562416	2.43017e+06	4.1528e+06	5.0399e+06	5.82172e+06	4797217	6132694	4.47501e+06	4730979	2.89782e+06	4.17827e+06	3.61883e+06	6713159	4526240	4287269	5805944	4.40675e+06	5421101	7.12878e+06	6301385	5263369	5.08884e+06	6.07889e+06	5883872	5.41086e+06
15632507	57	PC(16:0/20:4(8Z,11Z,14Z,17Z))	C44H80NO8P	None	None	4921345	5911650	5.75638e+06	6.15855e+06	4.86565e+06	3.63537e+06	4.05069e+06	3401234	4.8935e+06	5170113	6.31392e+06	5236592	4828755	7461500	8321023	4.06534e+06	3064549	5.20335e+06	2.5552e+06	3562416	2.43017e+06	4.1528e+06	5.0399e+06	5.82172e+06	4797217	6132694	4.47501e+06	4730979	2.89782e+06	4.17827e+06	3.61883e+06	6713159	4526240	4287269	5805944	4.40675e+06	5421101	7.12878e+06	6301385	5263369	5.08884e+06	6.07889e+06	5883872	5.41086e+06
15632508	57	PC(16:0/20:4(5Z,8Z,11Z,14Z))	C44H80NO8P	None	None	4921345	5911650	5.75638e+06	6.15855e+06	4.86565e+06	3.63537e+06	4.05069e+06	3401234	4.8935e+06	5170113	6.31392e+06	5236592	4828755	7461500	8321023	4.06534e+06	3064549	5.20335e+06	2.5552e+06	3562416	2.43017e+06	4.1528e+06	5.0399e+06	5.82172e+06	4797217	6132694	4.47501e+06	4730979	2.89782e+06	4.17827e+06	3.61883e+06	6713159	4526240	4287269	5805944	4.40675e+06	5421101	7.12878e+06	6301385	5263369	5.08884e+06	6.07889e+06	5883872	5.41086e+06
15632515	57	PC(14:0/22:4(7Z,10Z,13Z,16Z))	C44H80NO8P	None	None	4921345	5911650	5.75638e+06	6.15855e+06	4.86565e+06	3.63537e+06	4.05069e+06	3401234	4.8935e+06	5170113	6.31392e+06	5236592	4828755	7461500	8321023	4.06534e+06	3064549	5.20335e+06	2.5552e+06	3562416	2.43017e+06	4.1528e+06	5.0399e+06	5.82172e+06	4797217	6132694	4.47501e+06	4730979	2.89782e+06	4.17827e+06	3.61883e+06	6713159	4526240	4287269	5805944	4.40675e+06	5421101	7.12878e+06	6301385	5263369	5.08884e+06	6.07889e+06	5883872	5.41086e+06
15632539	57	PE(22:4(7Z,10Z,13Z,16Z)/17:0)	C44H80NO8P	None	None	4921345	5911650	5.75638e+06	6.15855e+06	4.86565e+06	3.63537e+06	4.05069e+06	3401234	4.8935e+06	5170113	6.31392e+06	5236592	4828755	7461500	8321023	4.06534e+06	3064549	5.20335e+06	2.5552e+06	3562416	2.43017e+06	4.1528e+06	5.0399e+06	5.82172e+06	4797217	6132694	4.47501e+06	4730979	2.89782e+06	4.17827e+06	3.61883e+06	6713159	4526240	4287269	5805944	4.40675e+06	5421101	7.12878e+06	6301385	5263369	5.08884e+06	6.07889e+06	5883872	5.41086e+06
15632541	57	PE(22:2(13Z,16Z)/17:2(9Z,12Z))	C44H80NO8P	None	None	4921345	5911650	5.75638e+06	6.15855e+06	4.86565e+06	3.63537e+06	4.05069e+06	3401234	4.8935e+06	5170113	6.31392e+06	5236592	4828755	7461500	8321023	4.06534e+06	3064549	5.20335e+06	2.5552e+06	3562416	2.43017e+06	4.1528e+06	5.0399e+06	5.82172e+06	4797217	6132694	4.47501e+06	4730979	2.89782e+06	4.17827e+06	3.61883e+06	6713159	4526240	4287269	5805944	4.40675e+06	5421101	7.12878e+06	6301385	5263369	5.08884e+06	6.07889e+06	5883872	5.41086e+06
15632543	57	PE(21:0/18:4(6Z,9Z,12Z,15Z))	C44H80NO8P	None	None	4921345	5911650	5.75638e+06	6.15855e+06	4.86565e+06	3.63537e+06	4.05069e+06	3401234	4.8935e+06	5170113	6.31392e+06	5236592	4828755	7461500	8321023	4.06534e+06	3064549	5.20335e+06	2.5552e+06	3562416	2.43017e+06	4.1528e+06	5.0399e+06	5.82172e+06	4797217	6132694	4.47501e+06	4730979	2.89782e+06	4.17827e+06	3.61883e+06	6713159	4526240	4287269	5805944	4.40675e+06	5421101	7.12878e+06	6301385	5263369	5.08884e+06	6.07889e+06	5883872	5.41086e+06
15632544	57	PC(18:0/18:4(9E,11E,13E,15E))	C44H80NO8P	None	None	4921345	5911650	5.75638e+06	6.15855e+06	4.86565e+06	3.63537e+06	4.05069e+06	3401234	4.8935e+06	5170113	6.31392e+06	5236592	4828755	7461500	8321023	4.06534e+06	3064549	5.20335e+06	2.5552e+06	3562416	2.43017e+06	4.1528e+06	5.0399e+06	5.82172e+06	4797217	6132694	4.47501e+06	4730979	2.89782e+06	4.17827e+06	3.61883e+06	6713159	4526240	4287269	5805944	4.40675e+06	5421101	7.12878e+06	6301385	5263369	5.08884e+06	6.07889e+06	5883872	5.41086e+06
15632545	57	PC(18:2(2Z,4Z)/18:2(2Z,4Z))	C44H80NO8P	None	None	4921345	5911650	5.75638e+06	6.15855e+06	4.86565e+06	3.63537e+06	4.05069e+06	3401234	4.8935e+06	5170113	6.31392e+06	5236592	4828755	7461500	8321023	4.06534e+06	3064549	5.20335e+06	2.5552e+06	3562416	2.43017e+06	4.1528e+06	5.0399e+06	5.82172e+06	4797217	6132694	4.47501e+06	4730979	2.89782e+06	4.17827e+06	3.61883e+06	6713159	4526240	4287269	5805944	4.40675e+06	5421101	7.12878e+06	6301385	5263369	5.08884e+06	6.07889e+06	5883872	5.41086e+06
15632546	57	PC(18:2(2E,4E)/18:2(2E,4E))	C44H80NO8P	None	None	4921345	5911650	5.75638e+06	6.15855e+06	4.86565e+06	3.63537e+06	4.05069e+06	3401234	4.8935e+06	5170113	6.31392e+06	5236592	4828755	7461500	8321023	4.06534e+06	3064549	5.20335e+06	2.5552e+06	3562416	2.43017e+06	4.1528e+06	5.0399e+06	5.82172e+06	4797217	6132694	4.47501e+06	4730979	2.89782e+06	4.17827e+06	3.61883e+06	6713159	4526240	4287269	5805944	4.40675e+06	5421101	7.12878e+06	6301385	5263369	5.08884e+06	6.07889e+06	5883872	5.41086e+06
15632547	57	PC(18:2(6Z,9Z)/18:2(6Z,9Z))	C44H80NO8P	None	None	4921345	5911650	5.75638e+06	6.15855e+06	4.86565e+06	3.63537e+06	4.05069e+06	3401234	4.8935e+06	5170113	6.31392e+06	5236592	4828755	7461500	8321023	4.06534e+06	3064549	5.20335e+06	2.5552e+06	3562416	2.43017e+06	4.1528e+06	5.0399e+06	5.82172e+06	4797217	6132694	4.47501e+06	4730979	2.89782e+06	4.17827e+06	3.61883e+06	6713159	4526240	4287269	5805944	4.40675e+06	5421101	7.12878e+06	6301385	5263369	5.08884e+06	6.07889e+06	5883872	5.41086e+06
15632548	57	PC(18:2(9Z,11Z)/18:2(9Z,11Z))	C44H80NO8P	None	None	4921345	5911650	5.75638e+06	6.15855e+06	4.86565e+06	3.63537e+06	4.05069e+06	3401234	4.8935e+06	5170113	6.31392e+06	5236592	4828755	7461500	8321023	4.06534e+06	3064549	5.20335e+06	2.5552e+06	3562416	2.43017e+06	4.1528e+06	5.0399e+06	5.82172e+06	4797217	6132694	4.47501e+06	4730979	2.89782e+06	4.17827e+06	3.61883e+06	6713159	4526240	4287269	5805944	4.40675e+06	5421101	7.12878e+06	6301385	5263369	5.08884e+06	6.07889e+06	5883872	5.41086e+06
15632549	57	PC(16:0/20:4(5E,8E,11E,14E))	C44H80NO8P	None	None	4921345	5911650	5.75638e+06	6.15855e+06	4.86565e+06	3.63537e+06	4.05069e+06	3401234	4.8935e+06	5170113	6.31392e+06	5236592	4828755	7461500	8321023	4.06534e+06	3064549	5.20335e+06	2.5552e+06	3562416	2.43017e+06	4.1528e+06	5.0399e+06	5.82172e+06	4797217	6132694	4.47501e+06	4730979	2.89782e+06	4.17827e+06	3.61883e+06	6713159	4526240	4287269	5805944	4.40675e+06	5421101	7.12878e+06	6301385	5263369	5.08884e+06	6.07889e+06	5883872	5.41086e+06
15632559	57	PC(20:4(8E,11E,14E,17E)/16:0)	C44H80NO8P	None	None	4921345	5911650	5.75638e+06	6.15855e+06	4.86565e+06	3.63537e+06	4.05069e+06	3401234	4.8935e+06	5170113	6.31392e+06	5236592	4828755	7461500	8321023	4.06534e+06	3064549	5.20335e+06	2.5552e+06	3562416	2.43017e+06	4.1528e+06	5.0399e+06	5.82172e+06	4797217	6132694	4.47501e+06	4730979	2.89782e+06	4.17827e+06	3.61883e+06	6713159	4526240	4287269	5805944	4.40675e+06	5421101	7.12878e+06	6301385	5263369	5.08884e+06	6.07889e+06	5883872	5.41086e+06
15632562	57	PE(17:2(9Z,12Z)/22:2(13Z,16Z))	C44H80NO8P	None	None	4921345	5911650	5.75638e+06	6.15855e+06	4.86565e+06	3.63537e+06	4.05069e+06	3401234	4.8935e+06	5170113	6.31392e+06	5236592	4828755	7461500	8321023	4.06534e+06	3064549	5.20335e+06	2.5552e+06	3562416	2.43017e+06	4.1528e+06	5.0399e+06	5.82172e+06	4797217	6132694	4.47501e+06	4730979	2.89782e+06	4.17827e+06	3.61883e+06	6713159	4526240	4287269	5805944	4.40675e+06	5421101	7.12878e+06	6301385	5263369	5.08884e+06	6.07889e+06	5883872	5.41086e+06
15632563	57	PE(18:4(6Z,9Z,12Z,15Z)/21:0)	C44H80NO8P	None	None	4921345	5911650	5.75638e+06	6.15855e+06	4.86565e+06	3.63537e+06	4.05069e+06	3401234	4.8935e+06	5170113	6.31392e+06	5236592	4828755	7461500	8321023	4.06534e+06	3064549	5.20335e+06	2.5552e+06	3562416	2.43017e+06	4.1528e+06	5.0399e+06	5.82172e+06	4797217	6132694	4.47501e+06	4730979	2.89782e+06	4.17827e+06	3.61883e+06	6713159	4526240	4287269	5805944	4.40675e+06	5421101	7.12878e+06	6301385	5263369	5.08884e+06	6.07889e+06	5883872	5.41086e+06
15632564	57	PE(19:0/20:4(5Z,8Z,11Z,14Z))	C44H80NO8P	None	None	4921345	5911650	5.75638e+06	6.15855e+06	4.86565e+06	3.63537e+06	4.05069e+06	3401234	4.8935e+06	5170113	6.31392e+06	5236592	4828755	7461500	8321023	4.06534e+06	3064549	5.20335e+06	2.5552e+06	3562416	2.43017e+06	4.1528e+06	5.0399e+06	5.82172e+06	4797217	6132694	4.47501e+06	4730979	2.89782e+06	4.17827e+06	3.61883e+06	6713159	4526240	4287269	5805944	4.40675e+06	5421101	7.12878e+06	6301385	5263369	5.08884e+06	6.07889e+06	5883872	5.41086e+06
15632568	57	PE(17:0/22:4(7Z,10Z,13Z,16Z))	C44H80NO8P	None	None	4921345	5911650	5.75638e+06	6.15855e+06	4.86565e+06	3.63537e+06	4.05069e+06	3401234	4.8935e+06	5170113	6.31392e+06	5236592	4828755	7461500	8321023	4.06534e+06	3064549	5.20335e+06	2.5552e+06	3562416	2.43017e+06	4.1528e+06	5.0399e+06	5.82172e+06	4797217	6132694	4.47501e+06	4730979	2.89782e+06	4.17827e+06	3.61883e+06	6713159	4526240	4287269	5805944	4.40675e+06	5421101	7.12878e+06	6301385	5263369	5.08884e+06	6.07889e+06	5883872	5.41086e+06
15632576	57	PE(19:1(9Z)/20:3(8Z,11Z,14Z))	C44H80NO8P	None	None	4921345	5911650	5.75638e+06	6.15855e+06	4.86565e+06	3.63537e+06	4.05069e+06	3401234	4.8935e+06	5170113	6.31392e+06	5236592	4828755	7461500	8321023	4.06534e+06	3064549	5.20335e+06	2.5552e+06	3562416	2.43017e+06	4.1528e+06	5.0399e+06	5.82172e+06	4797217	6132694	4.47501e+06	4730979	2.89782e+06	4.17827e+06	3.61883e+06	6713159	4526240	4287269	5805944	4.40675e+06	5421101	7.12878e+06	6301385	5263369	5.08884e+06	6.07889e+06	5883872	5.41086e+06
15632579	57	PE(20:3(8Z,11Z,14Z)/19:1(9Z))	C44H80NO8P	None	None	4921345	5911650	5.75638e+06	6.15855e+06	4.86565e+06	3.63537e+06	4.05069e+06	3401234	4.8935e+06	5170113	6.31392e+06	5236592	4828755	7461500	8321023	4.06534e+06	3064549	5.20335e+06	2.5552e+06	3562416	2.43017e+06	4.1528e+06	5.0399e+06	5.82172e+06	4797217	6132694	4.47501e+06	4730979	2.89782e+06	4.17827e+06	3.61883e+06	6713159	4526240	4287269	5805944	4.40675e+06	5421101	7.12878e+06	6301385	5263369	5.08884e+06	6.07889e+06	5883872	5.41086e+06
15632580	57	PE(20:4(5Z,8Z,11Z,14Z)/19:0)	C44H80NO8P	None	None	4921345	5911650	5.75638e+06	6.15855e+06	4.86565e+06	3.63537e+06	4.05069e+06	3401234	4.8935e+06	5170113	6.31392e+06	5236592	4828755	7461500	8321023	4.06534e+06	3064549	5.20335e+06	2.5552e+06	3562416	2.43017e+06	4.1528e+06	5.0399e+06	5.82172e+06	4797217	6132694	4.47501e+06	4730979	2.89782e+06	4.17827e+06	3.61883e+06	6713159	4526240	4287269	5805944	4.40675e+06	5421101	7.12878e+06	6301385	5263369	5.08884e+06	6.07889e+06	5883872	5.41086e+06
15632581	58	L-Alloisoleucine	C6H13NO2	None	None	26914916	28168256	23880094	36820644	31523782	21406890	27779734	17510940	27347325	28106710	34264432	24157094	37632004	39120992	25054934	28412434	16599263	28259572	25185756	34583156	27101266	38708148	23023114	30159692	32493262	45119580	31326477	23170330	31816068	19734068	27988842	40289216	22109420	21905456	46154060	25579586	27432622	30057744	23029194	29459286	22566802	27968804	23675338	19157248
15632582	58	L-Leucine	C6H13NO2	Environmental Information Processing; Membrane transport Metabolism; Amino acid metabolism Organismal Systems; Digestive system Organismal Systems; Digestive system Metabolism; Biosynthesis of other secondary metabolites Genetic Information Processing; Translation Metabolism; Amino acid metabolism BMA Synthesis	ABC transporters Valine, leucine and isoleucine biosynthesis Mineral absorption Protein digestion and absorption Glucosinolate biosynthesis Aminoacyl-tRNA biosynthesis Valine, leucine and isoleucine degradation IG-Amino-acid Biosynthesis 1	26914916	28168256	23880094	36820644	31523782	21406890	27779734	17510940	27347325	28106710	34264432	24157094	37632004	39120992	25054934	28412434	16599263	28259572	25185756	34583156	27101266	38708148	23023114	30159692	32493262	45119580	31326477	23170330	31816068	19734068	27988842	40289216	22109420	21905456	46154060	25579586	27432622	30057744	23029194	29459286	22566802	27968804	23675338	19157248
15632583	58	L-isoleucine	C6H13NO2	Metabolism; Biosynthesis of other secondary metabolites Organismal Systems; Digestive system Organismal Systems; Digestive system BMA Synthesis Environmental Information Processing; Membrane transport Genetic Information Processing; Translation Metabolism; Amino acid metabolism Metabolism; Biosynthesis of other secondary metabolites Metabolism; Metabolism of other amino acids Metabolism; Amino ac…	Tropane, piperidine and pyridine alkaloid biosynthesis Mineral absorption Protein digestion and absorption IG-Amino-acid Biosynthesis 2 ABC transporters Aminoacyl-tRNA biosynthesis Valine, leucine and isoleucine degradation Glucosinolate biosynthesis Cyanoamino acid metabolism Valine, leucine and isoleucine biosynthesis	26914916	28168256	23880094	36820644	31523782	21406890	27779734	17510940	27347325	28106710	34264432	24157094	37632004	39120992	25054934	28412434	16599263	28259572	25185756	34583156	27101266	38708148	23023114	30159692	32493262	45119580	31326477	23170330	31816068	19734068	27988842	40289216	22109420	21905456	46154060	25579586	27432622	30057744	23029194	29459286	22566802	27968804	23675338	19157248
15632584	58	Isoleucine	C6H13NO2	None	None	26914916	28168256	23880094	36820644	31523782	21406890	27779734	17510940	27347325	28106710	34264432	24157094	37632004	39120992	25054934	28412434	16599263	28259572	25185756	34583156	27101266	38708148	23023114	30159692	32493262	45119580	31326477	23170330	31816068	19734068	27988842	40289216	22109420	21905456	46154060	25579586	27432622	30057744	23029194	29459286	22566802	27968804	23675338	19157248
15632585	58	N-(2-Hydroxyethyl)-morpholine	C6H13NO2	None	None	26914916	28168256	23880094	36820644	31523782	21406890	27779734	17510940	27347325	28106710	34264432	24157094	37632004	39120992	25054934	28412434	16599263	28259572	25185756	34583156	27101266	38708148	23023114	30159692	32493262	45119580	31326477	23170330	31816068	19734068	27988842	40289216	22109420	21905456	46154060	25579586	27432622	30057744	23029194	29459286	22566802	27968804	23675338	19157248
15632586	58	6-amino-hexanoic acid	C6H13NO2	Metabolism; Xenobiotics biodegradation and metabolism	Caprolactam degradation	26914916	28168256	23880094	36820644	31523782	21406890	27779734	17510940	27347325	28106710	34264432	24157094	37632004	39120992	25054934	28412434	16599263	28259572	25185756	34583156	27101266	38708148	23023114	30159692	32493262	45119580	31326477	23170330	31816068	19734068	27988842	40289216	22109420	21905456	46154060	25579586	27432622	30057744	23029194	29459286	22566802	27968804	23675338	19157248
15632587	58	2S-amino-hexanoic acid	C6H13NO2	None	None	26914916	28168256	23880094	36820644	31523782	21406890	27779734	17510940	27347325	28106710	34264432	24157094	37632004	39120992	25054934	28412434	16599263	28259572	25185756	34583156	27101266	38708148	23023114	30159692	32493262	45119580	31326477	23170330	31816068	19734068	27988842	40289216	22109420	21905456	46154060	25579586	27432622	30057744	23029194	29459286	22566802	27968804	23675338	19157248
15632589	58	3-Aminocaproic acid	C6H13NO2	None	None	26914916	28168256	23880094	36820644	31523782	21406890	27779734	17510940	27347325	28106710	34264432	24157094	37632004	39120992	25054934	28412434	16599263	28259572	25185756	34583156	27101266	38708148	23023114	30159692	32493262	45119580	31326477	23170330	31816068	19734068	27988842	40289216	22109420	21905456	46154060	25579586	27432622	30057744	23029194	29459286	22566802	27968804	23675338	19157248
15632590	58	N-methylvaline	C6H13NO2	None	None	26914916	28168256	23880094	36820644	31523782	21406890	27779734	17510940	27347325	28106710	34264432	24157094	37632004	39120992	25054934	28412434	16599263	28259572	25185756	34583156	27101266	38708148	23023114	30159692	32493262	45119580	31326477	23170330	31816068	19734068	27988842	40289216	22109420	21905456	46154060	25579586	27432622	30057744	23029194	29459286	22566802	27968804	23675338	19157248
15632591	58	6-Deoxyfagomine	C6H13NO2	None	None	26914916	28168256	23880094	36820644	31523782	21406890	27779734	17510940	27347325	28106710	34264432	24157094	37632004	39120992	25054934	28412434	16599263	28259572	25185756	34583156	27101266	38708148	23023114	30159692	32493262	45119580	31326477	23170330	31816068	19734068	27988842	40289216	22109420	21905456	46154060	25579586	27432622	30057744	23029194	29459286	22566802	27968804	23675338	19157248
15632595	58	D-Leucine	C6H13NO2	None	None	26914916	28168256	23880094	36820644	31523782	21406890	27779734	17510940	27347325	28106710	34264432	24157094	37632004	39120992	25054934	28412434	16599263	28259572	25185756	34583156	27101266	38708148	23023114	30159692	32493262	45119580	31326477	23170330	31816068	19734068	27988842	40289216	22109420	21905456	46154060	25579586	27432622	30057744	23029194	29459286	22566802	27968804	23675338	19157248
15632596	58	Beta-Leucine	C6H13NO2	None	None	26914916	28168256	23880094	36820644	31523782	21406890	27779734	17510940	27347325	28106710	34264432	24157094	37632004	39120992	25054934	28412434	16599263	28259572	25185756	34583156	27101266	38708148	23023114	30159692	32493262	45119580	31326477	23170330	31816068	19734068	27988842	40289216	22109420	21905456	46154060	25579586	27432622	30057744	23029194	29459286	22566802	27968804	23675338	19157248
15632597	58	3,3,5-triiodo-L-thyronine-beta-D-glucuronoside	C6H13NO2	None	None	26914916	28168256	23880094	36820644	31523782	21406890	27779734	17510940	27347325	28106710	34264432	24157094	37632004	39120992	25054934	28412434	16599263	28259572	25185756	34583156	27101266	38708148	23023114	30159692	32493262	45119580	31326477	23170330	31816068	19734068	27988842	40289216	22109420	21905456	46154060	25579586	27432622	30057744	23029194	29459286	22566802	27968804	23675338	19157248
15632599	58	D-Isoleucine	C6H13NO2	None	None	26914916	28168256	23880094	36820644	31523782	21406890	27779734	17510940	27347325	28106710	34264432	24157094	37632004	39120992	25054934	28412434	16599263	28259572	25185756	34583156	27101266	38708148	23023114	30159692	32493262	45119580	31326477	23170330	31816068	19734068	27988842	40289216	22109420	21905456	46154060	25579586	27432622	30057744	23029194	29459286	22566802	27968804	23675338	19157248
15632600	58	beta-Alaninebetaine	C6H13NO2	None	None	26914916	28168256	23880094	36820644	31523782	21406890	27779734	17510940	27347325	28106710	34264432	24157094	37632004	39120992	25054934	28412434	16599263	28259572	25185756	34583156	27101266	38708148	23023114	30159692	32493262	45119580	31326477	23170330	31816068	19734068	27988842	40289216	22109420	21905456	46154060	25579586	27432622	30057744	23029194	29459286	22566802	27968804	23675338	19157248
15632601	58	(3R)-beta-Leucine	C6H13NO2	Metabolism; Amino acid metabolism	Valine, leucine and isoleucine degradation	26914916	28168256	23880094	36820644	31523782	21406890	27779734	17510940	27347325	28106710	34264432	24157094	37632004	39120992	25054934	28412434	16599263	28259572	25185756	34583156	27101266	38708148	23023114	30159692	32493262	45119580	31326477	23170330	31816068	19734068	27988842	40289216	22109420	21905456	46154060	25579586	27432622	30057744	23029194	29459286	22566802	27968804	23675338	19157248
15632603	58	N,N-Diethylglycine	C6H13NO2	None	None	26914916	28168256	23880094	36820644	31523782	21406890	27779734	17510940	27347325	28106710	34264432	24157094	37632004	39120992	25054934	28412434	16599263	28259572	25185756	34583156	27101266	38708148	23023114	30159692	32493262	45119580	31326477	23170330	31816068	19734068	27988842	40289216	22109420	21905456	46154060	25579586	27432622	30057744	23029194	29459286	22566802	27968804	23675338	19157248
15632605	60	L-Carnitine	C7H15NO3	Organismal Systems; Digestive system	Bile secretion	6252858	7.80366e+06	8517008	8.14005e+06	10116320	6767408	8950018	9359738	8.32853e+06	6.03578e+06	8.37558e+06	7.18142e+06	9760106	27346564	41667484	8668948	9625240	9147094	6874398	8892243	8771528	9951937	6.12148e+06	4913493	8148348	12606174	8459938	3.84166e+06	19895812	9053912	9528786	7740257	5.30446e+06	12929177	8847274	8950593	10547344	7471080	7.39409e+06	11097731	6810356	7.43039e+06	8448881	9732035
15632606	60	Malonyl-Carnitin	C7H15NO3	None	None	6252858	7.80366e+06	8517008	8.14005e+06	10116320	6767408	8950018	9359738	8.32853e+06	6.03578e+06	8.37558e+06	7.18142e+06	9760106	27346564	41667484	8668948	9625240	9147094	6874398	8892243	8771528	9951937	6.12148e+06	4913493	8148348	12606174	8459938	3.84166e+06	19895812	9053912	9528786	7740257	5.30446e+06	12929177	8847274	8950593	10547344	7471080	7.39409e+06	11097731	6810356	7.43039e+06	8448881	9732035
15632607	60	(S)-Carnitine	C7H15NO3	None	None	6252858	7.80366e+06	8517008	8.14005e+06	10116320	6767408	8950018	9359738	8.32853e+06	6.03578e+06	8.37558e+06	7.18142e+06	9760106	27346564	41667484	8668948	9625240	9147094	6874398	8892243	8771528	9951937	6.12148e+06	4913493	8148348	12606174	8459938	3.84166e+06	19895812	9053912	9528786	7740257	5.30446e+06	12929177	8847274	8950593	10547344	7471080	7.39409e+06	11097731	6810356	7.43039e+06	8448881	9732035
15632608	61	L-Arginine	C6H14N4O2	Human Diseases; Neurodegenerative diseases Human Diseases; Infectious diseases Environmental Information Processing; Membrane transport Metabolism; Metabolism of other amino acids Metabolism; Biosynthesis of other secondary metabolites Human Diseases; Infectious diseases Organismal Systems; Digestive system Genetic Information Processing; Translation Human Diseases; Infectious diseases Metabolism…	Amyotrophic lateral sclerosis (ALS) Amoebiasis ABC transporters D-Arginine and D-ornithine metabolism Clavulanic acid biosynthesis Chagas disease (American trypanosomiasis) Protein digestion and absorption Aminoacyl-tRNA biosynthesis Salmonella infection Arginine and proline metabolism	26765534	30567080	25303610	28823270	33479204	30891654	30247246	30284066	30265656	27818552	31742912	20677612	29540672	29627562	36590760	27904534	31150816	29584117	28498536	31944968	31120782	29976494	31835572	25154354	32718724	30684814	30902798	24694146	34770548	34331320	27676888	39128316	23911064	22950972	29655040	28665964	25474604	23260786	25536628	30617516	22132906	25617254	29063886	23578748
15632609	61	D-Arginine	C6H14N4O2	Metabolism; Metabolism of other amino acids	D-Arginine and D-ornithine metabolism	26765534	30567080	25303610	28823270	33479204	30891654	30247246	30284066	30265656	27818552	31742912	20677612	29540672	29627562	36590760	27904534	31150816	29584117	28498536	31944968	31120782	29976494	31835572	25154354	32718724	30684814	30902798	24694146	34770548	34331320	27676888	39128316	23911064	22950972	29655040	28665964	25474604	23260786	25536628	30617516	22132906	25617254	29063886	23578748
15632610	61	Amino acid(Arg-)	C6H14N4O2	None	None	26765534	30567080	25303610	28823270	33479204	30891654	30247246	30284066	30265656	27818552	31742912	20677612	29540672	29627562	36590760	27904534	31150816	29584117	28498536	31944968	31120782	29976494	31835572	25154354	32718724	30684814	30902798	24694146	34770548	34331320	27676888	39128316	23911064	22950972	29655040	28665964	25474604	23260786	25536628	30617516	22132906	25617254	29063886	23578748
15632612	64	Northienamycin	C10H14N2O4S	None	None	101019	96376.6	91612.4	78170.4	117330	100285	88275.3	92205.4	94291	94438.1	120544	68190.2	94849.7	90994.8	142176	91998.4	96565.3	94643.9	91774.4	99178.9	120513	90169.9	127895	66439.3	111103	98548.3	98863.6	67066	126720	120470	80653.5	130133	83007.9	72419.3	93104.9	88056.4	75071.7	64316.8	92257.9	85872.2	57673.5	80047.5	100180	73241.1
15632618	75	Bentazone	C10H12N2O3S	None	None	43884	44488.5	48769.8	36886.6	70493.6	48109.7	46581.3	41554.7	45534.9	44885.6	67029.3	37203.4	42973.5	42029.8	56968.1	39293.5	42882.3	42927.9	44469.1	54201.8	49118	50713.1	52632.2	29435.5	44094.2	49808.3	49463.2	33409.3	77197.4	59840	41719.8	78062	35126	34557.2	43523.3	42621.6	37318.7	29634.3	35492.7	44675	27916.2	41638.1	54730.6	32213.6
15632619	75	S 1319	C10H12N2O3S	None	None	43884	44488.5	48769.8	36886.6	70493.6	48109.7	46581.3	41554.7	45534.9	44885.6	67029.3	37203.4	42973.5	42029.8	56968.1	39293.5	42882.3	42927.9	44469.1	54201.8	49118	50713.1	52632.2	29435.5	44094.2	49808.3	49463.2	33409.3	77197.4	59840	41719.8	78062	35126	34557.2	43523.3	42621.6	37318.7	29634.3	35492.7	44675	27916.2	41638.1	54730.6	32213.6
15632625	77	6-Chlorocatechin	C15H13ClO6	None	None	37788.8	35509.7	33071.3	47746	56302.5	40422.4	37948.6	38492.9	38220.8	43035	52791.5	28864.2	31701.8	39499.1	62823.7	38356.3	39936	39717.5	31380.1	50177.2	40355.1	45521	50479.9	36102.9	36770.9	36839.9	38597.5	32975	52936.3	44737.6	30336.4	58123	35695.7	33226.3	38167.9	36931.8	33431.5	33172.2	32714.9	38717.3	26831.8	38804.1	39623.4	33036.8
15632692	82	Neurine	C5H13NO	None	None	9687871	7.01417e+06	6953654	7.6342e+06	9254060	8620787	9557932	11486076	8.93742e+06	7.30725e+06	8970975	6.31791e+06	9212638	9631406	12707172	9136225	10464087	9.17443e+06	7792087	15722678	8647095	26491730	12970433	7.49246e+06	31653146	7.03919e+06	10808764	4.98701e+06	6.72271e+06	6.72327e+06	7038440	10177327	6945660	4803615	7.07902e+06	6.83446e+06	6.91919e+06	8717695	8774675	9275999	10863603	9113033	8333219	6652077
15632693	82	Choline	C5H13NO	Metabolism; Lipid metabolism Organismal Systems; Digestive system Organismal Systems; Nervous system Metabolism; Amino acid metabolism Environmental Information Processing; Membrane transport	Glycerophospholipid metabolism Bile secretion Cholinergic synapse Glycine, serine and threonine metabolism ABC transporters	9687871	7.01417e+06	6953654	7.6342e+06	9254060	8620787	9557932	11486076	8.93742e+06	7.30725e+06	8970975	6.31791e+06	9212638	9631406	12707172	9136225	10464087	9.17443e+06	7792087	15722678	8647095	26491730	12970433	7.49246e+06	31653146	7.03919e+06	10808764	4.98701e+06	6.72271e+06	6.72327e+06	7038440	10177327	6945660	4803615	7.07902e+06	6.83446e+06	6.91919e+06	8717695	8774675	9275999	10863603	9113033	8333219	6652077
15632694	83	PC(16:0/0:0)	C24H50NO7P	None	None	17198990	19009356	13354852	19162710	13082865	11069211	17035222	12274390	15195037	15541170	12496034	15392343	17153070	28966682	17076758	15511742	11992137	15526456	23674538	28034418	13702500	30901356	16776171	21551104	28889562	22844640	23259589	17935344	5678724	13826216	11503210	27697728	14506077	13942568	22250788	1.42243e+07	9767553	21476672	19181364	12708982	15370890	15981630	22589114	10398342
15632718	83	PC(O-14:0/2:0)	C24H50NO7P	None	None	17198990	19009356	13354852	19162710	13082865	11069211	17035222	12274390	15195037	15541170	12496034	15392343	17153070	28966682	17076758	15511742	11992137	15526456	23674538	28034418	13702500	30901356	16776171	21551104	28889562	22844640	23259589	17935344	5678724	13826216	11503210	27697728	14506077	13942568	22250788	1.42243e+07	9767553	21476672	19181364	12708982	15370890	15981630	22589114	10398342
15632719	83	PC(0:0/16:0)	C24H50NO7P	None	None	17198990	19009356	13354852	19162710	13082865	11069211	17035222	12274390	15195037	15541170	12496034	15392343	17153070	28966682	17076758	15511742	11992137	15526456	23674538	28034418	13702500	30901356	16776171	21551104	28889562	22844640	23259589	17935344	5678724	13826216	11503210	27697728	14506077	13942568	22250788	1.42243e+07	9767553	21476672	19181364	12708982	15370890	15981630	22589114	10398342
15632720	83	PC(16:0/0:0)[rac]	C24H50NO7P	None	None	17198990	19009356	13354852	19162710	13082865	11069211	17035222	12274390	15195037	15541170	12496034	15392343	17153070	28966682	17076758	15511742	11992137	15526456	23674538	28034418	13702500	30901356	16776171	21551104	28889562	22844640	23259589	17935344	5678724	13826216	11503210	27697728	14506077	13942568	22250788	1.42243e+07	9767553	21476672	19181364	12708982	15370890	15981630	22589114	10398342
15632746	83	PE(19:0/0:0)	C24H50NO7P	None	None	17198990	19009356	13354852	19162710	13082865	11069211	17035222	12274390	15195037	15541170	12496034	15392343	17153070	28966682	17076758	15511742	11992137	15526456	23674538	28034418	13702500	30901356	16776171	21551104	28889562	22844640	23259589	17935344	5678724	13826216	11503210	27697728	14506077	13942568	22250788	1.42243e+07	9767553	21476672	19181364	12708982	15370890	15981630	22589114	10398342
15632763	85	PC(P-18:0/0:0)	C26H54NO6P	None	None	101426	105186	70522.1	81865	86238.1	74638.4	92616.4	106825	89427.2	86453.6	85816.6	93608.4	85684.8	119739	128158	89678.1	89425.8	89552	104595	142710	101376	155520	76971.8	174348	136885	128568	132726	92617.7	46658.8	95316.7	81077.1	212371	85503.7	62938.9	130510	89060.7	76830	116681	88211.2	105065	83034.4	82671.1	109437	64333.7
15632771	85	PC(O-18:1(11Z)/0:0)	C26H54NO6P	None	None	101426	105186	70522.1	81865	86238.1	74638.4	92616.4	106825	89427.2	86453.6	85816.6	93608.4	85684.8	119739	128158	89678.1	89425.8	89552	104595	142710	101376	155520	76971.8	174348	136885	128568	132726	92617.7	46658.8	95316.7	81077.1	212371	85503.7	62938.9	130510	89060.7	76830	116681	88211.2	105065	83034.4	82671.1	109437	64333.7
15632772	85	PC(O-18:1(9Z)/0:0)	C26H54NO6P	None	None	101426	105186	70522.1	81865	86238.1	74638.4	92616.4	106825	89427.2	86453.6	85816.6	93608.4	85684.8	119739	128158	89678.1	89425.8	89552	104595	142710	101376	155520	76971.8	174348	136885	128568	132726	92617.7	46658.8	95316.7	81077.1	212371	85503.7	62938.9	130510	89060.7	76830	116681	88211.2	105065	83034.4	82671.1	109437	64333.7
15632774	85	PC(O-18:1(1E)/0:0)	C26H54NO6P	None	None	101426	105186	70522.1	81865	86238.1	74638.4	92616.4	106825	89427.2	86453.6	85816.6	93608.4	85684.8	119739	128158	89678.1	89425.8	89552	104595	142710	101376	155520	76971.8	174348	136885	128568	132726	92617.7	46658.8	95316.7	81077.1	212371	85503.7	62938.9	130510	89060.7	76830	116681	88211.2	105065	83034.4	82671.1	109437	64333.7
15632775	87	PC(18:2(9Z,12Z)/0:0)	C26H50NO7P	None	None	22022606	18263116	15158076	25610376	10427927	9314679	15568629	4.90439e+06	1.53634e+07	23568292	13634706	15972921	18396992	20206866	7516773	14246455	4921719	15109688	8783675	10648678	8.23309e+06	16869298	4914535	5.34604e+06	15807255	16308438	9.71618e+06	12701180	941299	9253446	12981480	17959518	16287777	12219070	16489474	12841330	6.45773e+06	22936880	22370524	15062220	18789112	21581258	16413486	7940371
15632776	87	2-linoleoyl-sn-glycero-3-phosphocholine	C26H50NO7P	None	None	22022606	18263116	15158076	25610376	10427927	9314679	15568629	4.90439e+06	1.53634e+07	23568292	13634706	15972921	18396992	20206866	7516773	14246455	4921719	15109688	8783675	10648678	8.23309e+06	16869298	4914535	5.34604e+06	15807255	16308438	9.71618e+06	12701180	941299	9253446	12981480	17959518	16287777	12219070	16489474	12841330	6.45773e+06	22936880	22370524	15062220	18789112	21581258	16413486	7940371
15632782	87	PC(18:2(2E,4E)/0:0)	C26H50NO7P	None	None	22022606	18263116	15158076	25610376	10427927	9314679	15568629	4.90439e+06	1.53634e+07	23568292	13634706	15972921	18396992	20206866	7516773	14246455	4921719	15109688	8783675	10648678	8.23309e+06	16869298	4914535	5.34604e+06	15807255	16308438	9.71618e+06	12701180	941299	9253446	12981480	17959518	16287777	12219070	16489474	12841330	6.45773e+06	22936880	22370524	15062220	18789112	21581258	16413486	7940371
15632792	88	PC(20:2(11Z,14Z)/16:1(9Z))	C44H82NO8P	None	None	4188784	3.21494e+06	4452667	5074868	2.43301e+06	2114435	2.65676e+06	1.09946e+06	2.93585e+06	4224186	4.13467e+06	2.92945e+06	3.98507e+06	3.30104e+06	1.73917e+06	2.83136e+06	1.0896e+06	3.11525e+06	1.41436e+06	1.96195e+06	1.1876e+06	2.82548e+06	1424886	1549627	2.72531e+06	3.08932e+06	1.75579e+06	2370816	944797	1.65198e+06	2.6302e+06	2608023	2837210	2.86574e+06	3.18586e+06	2.61911e+06	3.16478e+06	5.67238e+06	4.08152e+06	3110881	3.34418e+06	3.97054e+06	3.91268e+06	3.71043e+06
15632793	88	PC(20:3(5Z,8Z,11Z)/16:0)	C44H82NO8P	None	None	4188784	3.21494e+06	4452667	5074868	2.43301e+06	2114435	2.65676e+06	1.09946e+06	2.93585e+06	4224186	4.13467e+06	2.92945e+06	3.98507e+06	3.30104e+06	1.73917e+06	2.83136e+06	1.0896e+06	3.11525e+06	1.41436e+06	1.96195e+06	1.1876e+06	2.82548e+06	1424886	1549627	2.72531e+06	3.08932e+06	1.75579e+06	2370816	944797	1.65198e+06	2.6302e+06	2608023	2837210	2.86574e+06	3.18586e+06	2.61911e+06	3.16478e+06	5.67238e+06	4.08152e+06	3110881	3.34418e+06	3.97054e+06	3.91268e+06	3.71043e+06
15632794	88	PC(20:3(8Z,11Z,14Z)/16:0)	C44H82NO8P	None	None	4188784	3.21494e+06	4452667	5074868	2.43301e+06	2114435	2.65676e+06	1.09946e+06	2.93585e+06	4224186	4.13467e+06	2.92945e+06	3.98507e+06	3.30104e+06	1.73917e+06	2.83136e+06	1.0896e+06	3.11525e+06	1.41436e+06	1.96195e+06	1.1876e+06	2.82548e+06	1424886	1549627	2.72531e+06	3.08932e+06	1.75579e+06	2370816	944797	1.65198e+06	2.6302e+06	2608023	2837210	2.86574e+06	3.18586e+06	2.61911e+06	3.16478e+06	5.67238e+06	4.08152e+06	3110881	3.34418e+06	3.97054e+06	3.91268e+06	3.71043e+06
15632795	88	PC(22:2(13Z,16Z)/14:1(9Z))	C44H82NO8P	None	None	4188784	3.21494e+06	4452667	5074868	2.43301e+06	2114435	2.65676e+06	1.09946e+06	2.93585e+06	4224186	4.13467e+06	2.92945e+06	3.98507e+06	3.30104e+06	1.73917e+06	2.83136e+06	1.0896e+06	3.11525e+06	1.41436e+06	1.96195e+06	1.1876e+06	2.82548e+06	1424886	1549627	2.72531e+06	3.08932e+06	1.75579e+06	2370816	944797	1.65198e+06	2.6302e+06	2608023	2837210	2.86574e+06	3.18586e+06	2.61911e+06	3.16478e+06	5.67238e+06	4.08152e+06	3110881	3.34418e+06	3.97054e+06	3.91268e+06	3.71043e+06
15632796	88	PC(16:1(9Z)/20:2(11Z,14Z))	C44H82NO8P	None	None	4188784	3.21494e+06	4452667	5074868	2.43301e+06	2114435	2.65676e+06	1.09946e+06	2.93585e+06	4224186	4.13467e+06	2.92945e+06	3.98507e+06	3.30104e+06	1.73917e+06	2.83136e+06	1.0896e+06	3.11525e+06	1.41436e+06	1.96195e+06	1.1876e+06	2.82548e+06	1424886	1549627	2.72531e+06	3.08932e+06	1.75579e+06	2370816	944797	1.65198e+06	2.6302e+06	2608023	2837210	2.86574e+06	3.18586e+06	2.61911e+06	3.16478e+06	5.67238e+06	4.08152e+06	3110881	3.34418e+06	3.97054e+06	3.91268e+06	3.71043e+06
15632797	88	PC(18:0/18:3(9Z,12Z,15Z))	C44H82NO8P	None	None	4188784	3.21494e+06	4452667	5074868	2.43301e+06	2114435	2.65676e+06	1.09946e+06	2.93585e+06	4224186	4.13467e+06	2.92945e+06	3.98507e+06	3.30104e+06	1.73917e+06	2.83136e+06	1.0896e+06	3.11525e+06	1.41436e+06	1.96195e+06	1.1876e+06	2.82548e+06	1424886	1549627	2.72531e+06	3.08932e+06	1.75579e+06	2370816	944797	1.65198e+06	2.6302e+06	2608023	2837210	2.86574e+06	3.18586e+06	2.61911e+06	3.16478e+06	5.67238e+06	4.08152e+06	3110881	3.34418e+06	3.97054e+06	3.91268e+06	3.71043e+06
15632798	88	PC(18:0/18:3(6Z,9Z,12Z))	C44H82NO8P	None	None	4188784	3.21494e+06	4452667	5074868	2.43301e+06	2114435	2.65676e+06	1.09946e+06	2.93585e+06	4224186	4.13467e+06	2.92945e+06	3.98507e+06	3.30104e+06	1.73917e+06	2.83136e+06	1.0896e+06	3.11525e+06	1.41436e+06	1.96195e+06	1.1876e+06	2.82548e+06	1424886	1549627	2.72531e+06	3.08932e+06	1.75579e+06	2370816	944797	1.65198e+06	2.6302e+06	2608023	2837210	2.86574e+06	3.18586e+06	2.61911e+06	3.16478e+06	5.67238e+06	4.08152e+06	3110881	3.34418e+06	3.97054e+06	3.91268e+06	3.71043e+06
15632800	88	PC(18:1(11Z)/18:2(9Z,12Z))	C44H82NO8P	None	None	4188784	3.21494e+06	4452667	5074868	2.43301e+06	2114435	2.65676e+06	1.09946e+06	2.93585e+06	4224186	4.13467e+06	2.92945e+06	3.98507e+06	3.30104e+06	1.73917e+06	2.83136e+06	1.0896e+06	3.11525e+06	1.41436e+06	1.96195e+06	1.1876e+06	2.82548e+06	1424886	1549627	2.72531e+06	3.08932e+06	1.75579e+06	2370816	944797	1.65198e+06	2.6302e+06	2608023	2837210	2.86574e+06	3.18586e+06	2.61911e+06	3.16478e+06	5.67238e+06	4.08152e+06	3110881	3.34418e+06	3.97054e+06	3.91268e+06	3.71043e+06
15632801	88	PC(18:2(9Z,12Z)/18:1(9Z))	C44H82NO8P	None	None	4188784	3.21494e+06	4452667	5074868	2.43301e+06	2114435	2.65676e+06	1.09946e+06	2.93585e+06	4224186	4.13467e+06	2.92945e+06	3.98507e+06	3.30104e+06	1.73917e+06	2.83136e+06	1.0896e+06	3.11525e+06	1.41436e+06	1.96195e+06	1.1876e+06	2.82548e+06	1424886	1549627	2.72531e+06	3.08932e+06	1.75579e+06	2370816	944797	1.65198e+06	2.6302e+06	2608023	2837210	2.86574e+06	3.18586e+06	2.61911e+06	3.16478e+06	5.67238e+06	4.08152e+06	3110881	3.34418e+06	3.97054e+06	3.91268e+06	3.71043e+06
15632802	88	PC(18:2(9Z,12Z)/18:1(11Z))	C44H82NO8P	None	None	4188784	3.21494e+06	4452667	5074868	2.43301e+06	2114435	2.65676e+06	1.09946e+06	2.93585e+06	4224186	4.13467e+06	2.92945e+06	3.98507e+06	3.30104e+06	1.73917e+06	2.83136e+06	1.0896e+06	3.11525e+06	1.41436e+06	1.96195e+06	1.1876e+06	2.82548e+06	1424886	1549627	2.72531e+06	3.08932e+06	1.75579e+06	2370816	944797	1.65198e+06	2.6302e+06	2608023	2837210	2.86574e+06	3.18586e+06	2.61911e+06	3.16478e+06	5.67238e+06	4.08152e+06	3110881	3.34418e+06	3.97054e+06	3.91268e+06	3.71043e+06
15632803	88	PC(18:1(9Z)/18:2(9Z,12Z))	C44H82NO8P	None	None	4188784	3.21494e+06	4452667	5074868	2.43301e+06	2114435	2.65676e+06	1.09946e+06	2.93585e+06	4224186	4.13467e+06	2.92945e+06	3.98507e+06	3.30104e+06	1.73917e+06	2.83136e+06	1.0896e+06	3.11525e+06	1.41436e+06	1.96195e+06	1.1876e+06	2.82548e+06	1424886	1549627	2.72531e+06	3.08932e+06	1.75579e+06	2370816	944797	1.65198e+06	2.6302e+06	2608023	2837210	2.86574e+06	3.18586e+06	2.61911e+06	3.16478e+06	5.67238e+06	4.08152e+06	3110881	3.34418e+06	3.97054e+06	3.91268e+06	3.71043e+06
15632804	88	PC(18:3(6Z,9Z,12Z)/18:0)	C44H82NO8P	None	None	4188784	3.21494e+06	4452667	5074868	2.43301e+06	2114435	2.65676e+06	1.09946e+06	2.93585e+06	4224186	4.13467e+06	2.92945e+06	3.98507e+06	3.30104e+06	1.73917e+06	2.83136e+06	1.0896e+06	3.11525e+06	1.41436e+06	1.96195e+06	1.1876e+06	2.82548e+06	1424886	1549627	2.72531e+06	3.08932e+06	1.75579e+06	2370816	944797	1.65198e+06	2.6302e+06	2608023	2837210	2.86574e+06	3.18586e+06	2.61911e+06	3.16478e+06	5.67238e+06	4.08152e+06	3110881	3.34418e+06	3.97054e+06	3.91268e+06	3.71043e+06
15632805	88	PC(18:3(9Z,12Z,15Z)/18:0)	C44H82NO8P	None	None	4188784	3.21494e+06	4452667	5074868	2.43301e+06	2114435	2.65676e+06	1.09946e+06	2.93585e+06	4224186	4.13467e+06	2.92945e+06	3.98507e+06	3.30104e+06	1.73917e+06	2.83136e+06	1.0896e+06	3.11525e+06	1.41436e+06	1.96195e+06	1.1876e+06	2.82548e+06	1424886	1549627	2.72531e+06	3.08932e+06	1.75579e+06	2370816	944797	1.65198e+06	2.6302e+06	2608023	2837210	2.86574e+06	3.18586e+06	2.61911e+06	3.16478e+06	5.67238e+06	4.08152e+06	3110881	3.34418e+06	3.97054e+06	3.91268e+06	3.71043e+06
15632807	88	PC(14:1(9Z)/22:2(13Z,16Z))	C44H82NO8P	None	None	4188784	3.21494e+06	4452667	5074868	2.43301e+06	2114435	2.65676e+06	1.09946e+06	2.93585e+06	4224186	4.13467e+06	2.92945e+06	3.98507e+06	3.30104e+06	1.73917e+06	2.83136e+06	1.0896e+06	3.11525e+06	1.41436e+06	1.96195e+06	1.1876e+06	2.82548e+06	1424886	1549627	2.72531e+06	3.08932e+06	1.75579e+06	2370816	944797	1.65198e+06	2.6302e+06	2608023	2837210	2.86574e+06	3.18586e+06	2.61911e+06	3.16478e+06	5.67238e+06	4.08152e+06	3110881	3.34418e+06	3.97054e+06	3.91268e+06	3.71043e+06
15632808	88	PC(16:0/20:3(8Z,11Z,14Z))	C44H82NO8P	None	None	4188784	3.21494e+06	4452667	5074868	2.43301e+06	2114435	2.65676e+06	1.09946e+06	2.93585e+06	4224186	4.13467e+06	2.92945e+06	3.98507e+06	3.30104e+06	1.73917e+06	2.83136e+06	1.0896e+06	3.11525e+06	1.41436e+06	1.96195e+06	1.1876e+06	2.82548e+06	1424886	1549627	2.72531e+06	3.08932e+06	1.75579e+06	2370816	944797	1.65198e+06	2.6302e+06	2608023	2837210	2.86574e+06	3.18586e+06	2.61911e+06	3.16478e+06	5.67238e+06	4.08152e+06	3110881	3.34418e+06	3.97054e+06	3.91268e+06	3.71043e+06
15632809	88	PC(16:0/20:3(5Z,8Z,11Z))	C44H82NO8P	None	None	4188784	3.21494e+06	4452667	5074868	2.43301e+06	2114435	2.65676e+06	1.09946e+06	2.93585e+06	4224186	4.13467e+06	2.92945e+06	3.98507e+06	3.30104e+06	1.73917e+06	2.83136e+06	1.0896e+06	3.11525e+06	1.41436e+06	1.96195e+06	1.1876e+06	2.82548e+06	1424886	1549627	2.72531e+06	3.08932e+06	1.75579e+06	2370816	944797	1.65198e+06	2.6302e+06	2608023	2837210	2.86574e+06	3.18586e+06	2.61911e+06	3.16478e+06	5.67238e+06	4.08152e+06	3110881	3.34418e+06	3.97054e+06	3.91268e+06	3.71043e+06
15632829	88	PE(22:1(11Z)/17:2(9Z,12Z))	C44H82NO8P	None	None	4188784	3.21494e+06	4452667	5074868	2.43301e+06	2114435	2.65676e+06	1.09946e+06	2.93585e+06	4224186	4.13467e+06	2.92945e+06	3.98507e+06	3.30104e+06	1.73917e+06	2.83136e+06	1.0896e+06	3.11525e+06	1.41436e+06	1.96195e+06	1.1876e+06	2.82548e+06	1424886	1549627	2.72531e+06	3.08932e+06	1.75579e+06	2370816	944797	1.65198e+06	2.6302e+06	2608023	2837210	2.86574e+06	3.18586e+06	2.61911e+06	3.16478e+06	5.67238e+06	4.08152e+06	3110881	3.34418e+06	3.97054e+06	3.91268e+06	3.71043e+06
15632830	88	PE(22:2(13Z,16Z)/17:1(9Z))	C44H82NO8P	None	None	4188784	3.21494e+06	4452667	5074868	2.43301e+06	2114435	2.65676e+06	1.09946e+06	2.93585e+06	4224186	4.13467e+06	2.92945e+06	3.98507e+06	3.30104e+06	1.73917e+06	2.83136e+06	1.0896e+06	3.11525e+06	1.41436e+06	1.96195e+06	1.1876e+06	2.82548e+06	1424886	1549627	2.72531e+06	3.08932e+06	1.75579e+06	2370816	944797	1.65198e+06	2.6302e+06	2608023	2837210	2.86574e+06	3.18586e+06	2.61911e+06	3.16478e+06	5.67238e+06	4.08152e+06	3110881	3.34418e+06	3.97054e+06	3.91268e+06	3.71043e+06
15632831	88	PE(21:0/18:3(9Z,12Z,15Z))	C44H82NO8P	None	None	4188784	3.21494e+06	4452667	5074868	2.43301e+06	2114435	2.65676e+06	1.09946e+06	2.93585e+06	4224186	4.13467e+06	2.92945e+06	3.98507e+06	3.30104e+06	1.73917e+06	2.83136e+06	1.0896e+06	3.11525e+06	1.41436e+06	1.96195e+06	1.1876e+06	2.82548e+06	1424886	1549627	2.72531e+06	3.08932e+06	1.75579e+06	2370816	944797	1.65198e+06	2.6302e+06	2608023	2837210	2.86574e+06	3.18586e+06	2.61911e+06	3.16478e+06	5.67238e+06	4.08152e+06	3110881	3.34418e+06	3.97054e+06	3.91268e+06	3.71043e+06
15632832	88	PE(21:0/18:3(6Z,9Z,12Z))	C44H82NO8P	None	None	4188784	3.21494e+06	4452667	5074868	2.43301e+06	2114435	2.65676e+06	1.09946e+06	2.93585e+06	4224186	4.13467e+06	2.92945e+06	3.98507e+06	3.30104e+06	1.73917e+06	2.83136e+06	1.0896e+06	3.11525e+06	1.41436e+06	1.96195e+06	1.1876e+06	2.82548e+06	1424886	1549627	2.72531e+06	3.08932e+06	1.75579e+06	2370816	944797	1.65198e+06	2.6302e+06	2608023	2837210	2.86574e+06	3.18586e+06	2.61911e+06	3.16478e+06	5.67238e+06	4.08152e+06	3110881	3.34418e+06	3.97054e+06	3.91268e+06	3.71043e+06
15632833	88	PC(18:1(9Z)/18:2(6Z,9Z))	C44H82NO8P	None	None	4188784	3.21494e+06	4452667	5074868	2.43301e+06	2114435	2.65676e+06	1.09946e+06	2.93585e+06	4224186	4.13467e+06	2.92945e+06	3.98507e+06	3.30104e+06	1.73917e+06	2.83136e+06	1.0896e+06	3.11525e+06	1.41436e+06	1.96195e+06	1.1876e+06	2.82548e+06	1424886	1549627	2.72531e+06	3.08932e+06	1.75579e+06	2370816	944797	1.65198e+06	2.6302e+06	2608023	2837210	2.86574e+06	3.18586e+06	2.61911e+06	3.16478e+06	5.67238e+06	4.08152e+06	3110881	3.34418e+06	3.97054e+06	3.91268e+06	3.71043e+06
15632840	88	PC(16:0/20:3(8E,11E,14E))	C44H82NO8P	None	None	4188784	3.21494e+06	4452667	5074868	2.43301e+06	2114435	2.65676e+06	1.09946e+06	2.93585e+06	4224186	4.13467e+06	2.92945e+06	3.98507e+06	3.30104e+06	1.73917e+06	2.83136e+06	1.0896e+06	3.11525e+06	1.41436e+06	1.96195e+06	1.1876e+06	2.82548e+06	1424886	1549627	2.72531e+06	3.08932e+06	1.75579e+06	2370816	944797	1.65198e+06	2.6302e+06	2608023	2837210	2.86574e+06	3.18586e+06	2.61911e+06	3.16478e+06	5.67238e+06	4.08152e+06	3110881	3.34418e+06	3.97054e+06	3.91268e+06	3.71043e+06
15632842	88	PC(17:2(9Z,12Z)/19:1(9Z))	C44H82NO8P	None	None	4188784	3.21494e+06	4452667	5074868	2.43301e+06	2114435	2.65676e+06	1.09946e+06	2.93585e+06	4224186	4.13467e+06	2.92945e+06	3.98507e+06	3.30104e+06	1.73917e+06	2.83136e+06	1.0896e+06	3.11525e+06	1.41436e+06	1.96195e+06	1.1876e+06	2.82548e+06	1424886	1549627	2.72531e+06	3.08932e+06	1.75579e+06	2370816	944797	1.65198e+06	2.6302e+06	2608023	2837210	2.86574e+06	3.18586e+06	2.61911e+06	3.16478e+06	5.67238e+06	4.08152e+06	3110881	3.34418e+06	3.97054e+06	3.91268e+06	3.71043e+06
15632848	88	PE(17:2(9Z,12Z)/22:1(11Z))	C44H82NO8P	None	None	4188784	3.21494e+06	4452667	5074868	2.43301e+06	2114435	2.65676e+06	1.09946e+06	2.93585e+06	4224186	4.13467e+06	2.92945e+06	3.98507e+06	3.30104e+06	1.73917e+06	2.83136e+06	1.0896e+06	3.11525e+06	1.41436e+06	1.96195e+06	1.1876e+06	2.82548e+06	1424886	1549627	2.72531e+06	3.08932e+06	1.75579e+06	2370816	944797	1.65198e+06	2.6302e+06	2608023	2837210	2.86574e+06	3.18586e+06	2.61911e+06	3.16478e+06	5.67238e+06	4.08152e+06	3110881	3.34418e+06	3.97054e+06	3.91268e+06	3.71043e+06
15632849	88	PE(19:0/20:3(8Z,11Z,14Z))	C44H82NO8P	None	None	4188784	3.21494e+06	4452667	5074868	2.43301e+06	2114435	2.65676e+06	1.09946e+06	2.93585e+06	4224186	4.13467e+06	2.92945e+06	3.98507e+06	3.30104e+06	1.73917e+06	2.83136e+06	1.0896e+06	3.11525e+06	1.41436e+06	1.96195e+06	1.1876e+06	2.82548e+06	1424886	1549627	2.72531e+06	3.08932e+06	1.75579e+06	2370816	944797	1.65198e+06	2.6302e+06	2608023	2837210	2.86574e+06	3.18586e+06	2.61911e+06	3.16478e+06	5.67238e+06	4.08152e+06	3110881	3.34418e+06	3.97054e+06	3.91268e+06	3.71043e+06
15632850	88	PE(18:3(6Z,9Z,12Z)/21:0)	C44H82NO8P	None	None	4188784	3.21494e+06	4452667	5074868	2.43301e+06	2114435	2.65676e+06	1.09946e+06	2.93585e+06	4224186	4.13467e+06	2.92945e+06	3.98507e+06	3.30104e+06	1.73917e+06	2.83136e+06	1.0896e+06	3.11525e+06	1.41436e+06	1.96195e+06	1.1876e+06	2.82548e+06	1424886	1549627	2.72531e+06	3.08932e+06	1.75579e+06	2370816	944797	1.65198e+06	2.6302e+06	2608023	2837210	2.86574e+06	3.18586e+06	2.61911e+06	3.16478e+06	5.67238e+06	4.08152e+06	3110881	3.34418e+06	3.97054e+06	3.91268e+06	3.71043e+06
15632851	88	PE(18:3(9Z,12Z,15Z)/21:0)	C44H82NO8P	None	None	4188784	3.21494e+06	4452667	5074868	2.43301e+06	2114435	2.65676e+06	1.09946e+06	2.93585e+06	4224186	4.13467e+06	2.92945e+06	3.98507e+06	3.30104e+06	1.73917e+06	2.83136e+06	1.0896e+06	3.11525e+06	1.41436e+06	1.96195e+06	1.1876e+06	2.82548e+06	1424886	1549627	2.72531e+06	3.08932e+06	1.75579e+06	2370816	944797	1.65198e+06	2.6302e+06	2608023	2837210	2.86574e+06	3.18586e+06	2.61911e+06	3.16478e+06	5.67238e+06	4.08152e+06	3110881	3.34418e+06	3.97054e+06	3.91268e+06	3.71043e+06
15632853	88	PE(17:1(9Z)/22:2(13Z,16Z))	C44H82NO8P	None	None	4188784	3.21494e+06	4452667	5074868	2.43301e+06	2114435	2.65676e+06	1.09946e+06	2.93585e+06	4224186	4.13467e+06	2.92945e+06	3.98507e+06	3.30104e+06	1.73917e+06	2.83136e+06	1.0896e+06	3.11525e+06	1.41436e+06	1.96195e+06	1.1876e+06	2.82548e+06	1424886	1549627	2.72531e+06	3.08932e+06	1.75579e+06	2370816	944797	1.65198e+06	2.6302e+06	2608023	2837210	2.86574e+06	3.18586e+06	2.61911e+06	3.16478e+06	5.67238e+06	4.08152e+06	3110881	3.34418e+06	3.97054e+06	3.91268e+06	3.71043e+06
15632854	88	PC(19:1(9Z)/17:2(9Z,12Z))	C44H82NO8P	None	None	4188784	3.21494e+06	4452667	5074868	2.43301e+06	2114435	2.65676e+06	1.09946e+06	2.93585e+06	4224186	4.13467e+06	2.92945e+06	3.98507e+06	3.30104e+06	1.73917e+06	2.83136e+06	1.0896e+06	3.11525e+06	1.41436e+06	1.96195e+06	1.1876e+06	2.82548e+06	1424886	1549627	2.72531e+06	3.08932e+06	1.75579e+06	2370816	944797	1.65198e+06	2.6302e+06	2608023	2837210	2.86574e+06	3.18586e+06	2.61911e+06	3.16478e+06	5.67238e+06	4.08152e+06	3110881	3.34418e+06	3.97054e+06	3.91268e+06	3.71043e+06
15632855	88	PE(20:2(11Z,14Z)/19:1(9Z))	C44H82NO8P	None	None	4188784	3.21494e+06	4452667	5074868	2.43301e+06	2114435	2.65676e+06	1.09946e+06	2.93585e+06	4224186	4.13467e+06	2.92945e+06	3.98507e+06	3.30104e+06	1.73917e+06	2.83136e+06	1.0896e+06	3.11525e+06	1.41436e+06	1.96195e+06	1.1876e+06	2.82548e+06	1424886	1549627	2.72531e+06	3.08932e+06	1.75579e+06	2370816	944797	1.65198e+06	2.6302e+06	2608023	2837210	2.86574e+06	3.18586e+06	2.61911e+06	3.16478e+06	5.67238e+06	4.08152e+06	3110881	3.34418e+06	3.97054e+06	3.91268e+06	3.71043e+06
15632857	88	PE(19:1(9Z)/20:2(11Z,14Z))	C44H82NO8P	None	None	4188784	3.21494e+06	4452667	5074868	2.43301e+06	2114435	2.65676e+06	1.09946e+06	2.93585e+06	4224186	4.13467e+06	2.92945e+06	3.98507e+06	3.30104e+06	1.73917e+06	2.83136e+06	1.0896e+06	3.11525e+06	1.41436e+06	1.96195e+06	1.1876e+06	2.82548e+06	1424886	1549627	2.72531e+06	3.08932e+06	1.75579e+06	2370816	944797	1.65198e+06	2.6302e+06	2608023	2837210	2.86574e+06	3.18586e+06	2.61911e+06	3.16478e+06	5.67238e+06	4.08152e+06	3110881	3.34418e+06	3.97054e+06	3.91268e+06	3.71043e+06
15632859	88	PE(20:3(8Z,11Z,14Z)/19:0)	C44H82NO8P	None	None	4188784	3.21494e+06	4452667	5074868	2.43301e+06	2114435	2.65676e+06	1.09946e+06	2.93585e+06	4224186	4.13467e+06	2.92945e+06	3.98507e+06	3.30104e+06	1.73917e+06	2.83136e+06	1.0896e+06	3.11525e+06	1.41436e+06	1.96195e+06	1.1876e+06	2.82548e+06	1424886	1549627	2.72531e+06	3.08932e+06	1.75579e+06	2370816	944797	1.65198e+06	2.6302e+06	2608023	2837210	2.86574e+06	3.18586e+06	2.61911e+06	3.16478e+06	5.67238e+06	4.08152e+06	3110881	3.34418e+06	3.97054e+06	3.91268e+06	3.71043e+06
15632860	89	LysoPC(20:3(5Z,8Z,11Z))	C28H52NO7P	None	None	1993819	1.17483e+06	1.54837e+06	2120498	938337	812296	1.41977e+06	574336	1.2973e+06	2057303	1.02824e+06	1.26835e+06	2001935	1998683	481679	1.65095e+06	562678	1.45965e+06	1047831	1.04471e+06	834660	1.74103e+06	0	327690	1.46404e+06	943150	993931	665787	0	673847	1.43186e+06	1.26195e+06	1.18678e+06	1.40492e+06	1.19403e+06	1.1904e+06	880189	1.76562e+06	1.57035e+06	1.38815e+06	2199381	2.0589e+06	1416760	1094839
15632861	89	PC(20:3(8Z,11Z,14Z)/0:0)	C28H52NO7P	None	None	1993819	1.17483e+06	1.54837e+06	2120498	938337	812296	1.41977e+06	574336	1.2973e+06	2057303	1.02824e+06	1.26835e+06	2001935	1998683	481679	1.65095e+06	562678	1.45965e+06	1047831	1.04471e+06	834660	1.74103e+06	0	327690	1.46404e+06	943150	993931	665787	0	673847	1.43186e+06	1.26195e+06	1.18678e+06	1.40492e+06	1.19403e+06	1.1904e+06	880189	1.76562e+06	1.57035e+06	1.38815e+06	2199381	2.0589e+06	1416760	1094839
15632869	94	PC(18:0/0:0)	C26H54NO7P	None	None	12785214	12995264	10639227	15103272	9590745	10825090	13230947	9855153	11805152	12045521	10724867	9679285	13513090	16779868	7312221	13547771	9620019	11385194	19130392	20969314	9701824	25902540	7.00029e+06	10408317	20455892	13296798	16213595	7.48354e+06	3.93246e+06	8407270	9763272	13840591	10782110	11577516	13256178	10272691	7800186	16820116	13315965	9860926	10023615	11459297	18443770	7354652
15632870	94	PC(0:0/18:0)	C26H54NO7P	None	None	12785214	12995264	10639227	15103272	9590745	10825090	13230947	9855153	11805152	12045521	10724867	9679285	13513090	16779868	7312221	13547771	9620019	11385194	19130392	20969314	9701824	25902540	7.00029e+06	10408317	20455892	13296798	16213595	7.48354e+06	3.93246e+06	8407270	9763272	13840591	10782110	11577516	13256178	10272691	7800186	16820116	13315965	9860926	10023615	11459297	18443770	7354652
15632873	94	PC(O-16:0/2:0)	C26H54NO7P	None	None	12785214	12995264	10639227	15103272	9590745	10825090	13230947	9855153	11805152	12045521	10724867	9679285	13513090	16779868	7312221	13547771	9620019	11385194	19130392	20969314	9701824	25902540	7.00029e+06	10408317	20455892	13296798	16213595	7.48354e+06	3.93246e+06	8407270	9763272	13840591	10782110	11577516	13256178	10272691	7800186	16820116	13315965	9860926	10023615	11459297	18443770	7354652
15632890	94	PE(21:0/0:0)	C26H54NO7P	None	None	12785214	12995264	10639227	15103272	9590745	10825090	13230947	9855153	11805152	12045521	10724867	9679285	13513090	16779868	7312221	13547771	9620019	11385194	19130392	20969314	9701824	25902540	7.00029e+06	10408317	20455892	13296798	16213595	7.48354e+06	3.93246e+06	8407270	9763272	13840591	10782110	11577516	13256178	10272691	7800186	16820116	13315965	9860926	10023615	11459297	18443770	7354652
15632891	95	PE(22:1(13Z)/15:0)	C42H82NO8P	None	None	11490649	10223000	12655984	11301796	11745253	8551020	9518585	13292233	1.13962e+07	12538121	11820092	15334299	8.14181e+06	16300107	25103716	9560835	11930092	1.22341e+07	6645029	5.23533e+06	8021645	7.29719e+06	23695598	16476568	8446033	14559664	8233839	17209096	17780772	19951622	8644504	22683244	9097800	10184768	13647322	15428209	13434762	12713817	11131599	10348353	9705298	11635532	15633641	13162173
15632892	95	PE(15:0/22:1(13Z))	C42H82NO8P	None	None	11490649	10223000	12655984	11301796	11745253	8551020	9518585	13292233	1.13962e+07	12538121	11820092	15334299	8.14181e+06	16300107	25103716	9560835	11930092	1.22341e+07	6645029	5.23533e+06	8021645	7.29719e+06	23695598	16476568	8446033	14559664	8233839	17209096	17780772	19951622	8644504	22683244	9097800	10184768	13647322	15428209	13434762	12713817	11131599	10348353	9705298	11635532	15633641	13162173
15632903	95	PC(16:1(9Z)/18:0)	C42H82NO8P	None	None	11490649	10223000	12655984	11301796	11745253	8551020	9518585	13292233	1.13962e+07	12538121	11820092	15334299	8.14181e+06	16300107	25103716	9560835	11930092	1.22341e+07	6645029	5.23533e+06	8021645	7.29719e+06	23695598	16476568	8446033	14559664	8233839	17209096	17780772	19951622	8644504	22683244	9097800	10184768	13647322	15428209	13434762	12713817	11131599	10348353	9705298	11635532	15633641	13162173
15632904	95	PC(18:0/16:1(9Z))	C42H82NO8P	None	None	11490649	10223000	12655984	11301796	11745253	8551020	9518585	13292233	1.13962e+07	12538121	11820092	15334299	8.14181e+06	16300107	25103716	9560835	11930092	1.22341e+07	6645029	5.23533e+06	8021645	7.29719e+06	23695598	16476568	8446033	14559664	8233839	17209096	17780772	19951622	8644504	22683244	9097800	10184768	13647322	15428209	13434762	12713817	11131599	10348353	9705298	11635532	15633641	13162173
15632905	95	PC(18:1(11Z)/16:0)	C42H82NO8P	None	None	11490649	10223000	12655984	11301796	11745253	8551020	9518585	13292233	1.13962e+07	12538121	11820092	15334299	8.14181e+06	16300107	25103716	9560835	11930092	1.22341e+07	6645029	5.23533e+06	8021645	7.29719e+06	23695598	16476568	8446033	14559664	8233839	17209096	17780772	19951622	8644504	22683244	9097800	10184768	13647322	15428209	13434762	12713817	11131599	10348353	9705298	11635532	15633641	13162173
15632906	95	PC(18:1(9Z)/16:0)	C42H82NO8P	None	None	11490649	10223000	12655984	11301796	11745253	8551020	9518585	13292233	1.13962e+07	12538121	11820092	15334299	8.14181e+06	16300107	25103716	9560835	11930092	1.22341e+07	6645029	5.23533e+06	8021645	7.29719e+06	23695598	16476568	8446033	14559664	8233839	17209096	17780772	19951622	8644504	22683244	9097800	10184768	13647322	15428209	13434762	12713817	11131599	10348353	9705298	11635532	15633641	13162173
15632907	95	PC(20:1(11Z)/14:0)	C42H82NO8P	None	None	11490649	10223000	12655984	11301796	11745253	8551020	9518585	13292233	1.13962e+07	12538121	11820092	15334299	8.14181e+06	16300107	25103716	9560835	11930092	1.22341e+07	6645029	5.23533e+06	8021645	7.29719e+06	23695598	16476568	8446033	14559664	8233839	17209096	17780772	19951622	8644504	22683244	9097800	10184768	13647322	15428209	13434762	12713817	11131599	10348353	9705298	11635532	15633641	13162173
15632908	95	PC(20:0/14:1(9Z))	C42H82NO8P	None	None	11490649	10223000	12655984	11301796	11745253	8551020	9518585	13292233	1.13962e+07	12538121	11820092	15334299	8.14181e+06	16300107	25103716	9560835	11930092	1.22341e+07	6645029	5.23533e+06	8021645	7.29719e+06	23695598	16476568	8446033	14559664	8233839	17209096	17780772	19951622	8644504	22683244	9097800	10184768	13647322	15428209	13434762	12713817	11131599	10348353	9705298	11635532	15633641	13162173
15632909	95	PC(14:1(9Z)/20:0)	C42H82NO8P	None	None	11490649	10223000	12655984	11301796	11745253	8551020	9518585	13292233	1.13962e+07	12538121	11820092	15334299	8.14181e+06	16300107	25103716	9560835	11930092	1.22341e+07	6645029	5.23533e+06	8021645	7.29719e+06	23695598	16476568	8446033	14559664	8233839	17209096	17780772	19951622	8644504	22683244	9097800	10184768	13647322	15428209	13434762	12713817	11131599	10348353	9705298	11635532	15633641	13162173
15632910	95	PC(16:0/18:1(9Z))	C42H82NO8P	None	None	11490649	10223000	12655984	11301796	11745253	8551020	9518585	13292233	1.13962e+07	12538121	11820092	15334299	8.14181e+06	16300107	25103716	9560835	11930092	1.22341e+07	6645029	5.23533e+06	8021645	7.29719e+06	23695598	16476568	8446033	14559664	8233839	17209096	17780772	19951622	8644504	22683244	9097800	10184768	13647322	15428209	13434762	12713817	11131599	10348353	9705298	11635532	15633641	13162173
15632911	95	PC(16:0/18:1(11Z))	C42H82NO8P	None	None	11490649	10223000	12655984	11301796	11745253	8551020	9518585	13292233	1.13962e+07	12538121	11820092	15334299	8.14181e+06	16300107	25103716	9560835	11930092	1.22341e+07	6645029	5.23533e+06	8021645	7.29719e+06	23695598	16476568	8446033	14559664	8233839	17209096	17780772	19951622	8644504	22683244	9097800	10184768	13647322	15428209	13434762	12713817	11131599	10348353	9705298	11635532	15633641	13162173
15632922	95	PC(14:0/20:1(11Z))	C42H82NO8P	None	None	11490649	10223000	12655984	11301796	11745253	8551020	9518585	13292233	1.13962e+07	12538121	11820092	15334299	8.14181e+06	16300107	25103716	9560835	11930092	1.22341e+07	6645029	5.23533e+06	8021645	7.29719e+06	23695598	16476568	8446033	14559664	8233839	17209096	17780772	19951622	8644504	22683244	9097800	10184768	13647322	15428209	13434762	12713817	11131599	10348353	9705298	11635532	15633641	13162173
15632930	95	PC(22:1(11Z)/12:0)	C42H82NO8P	None	None	11490649	10223000	12655984	11301796	11745253	8551020	9518585	13292233	1.13962e+07	12538121	11820092	15334299	8.14181e+06	16300107	25103716	9560835	11930092	1.22341e+07	6645029	5.23533e+06	8021645	7.29719e+06	23695598	16476568	8446033	14559664	8233839	17209096	17780772	19951622	8644504	22683244	9097800	10184768	13647322	15428209	13434762	12713817	11131599	10348353	9705298	11635532	15633641	13162173
15632933	95	PE(22:1(11Z)/15:0)	C42H82NO8P	None	None	11490649	10223000	12655984	11301796	11745253	8551020	9518585	13292233	1.13962e+07	12538121	11820092	15334299	8.14181e+06	16300107	25103716	9560835	11930092	1.22341e+07	6645029	5.23533e+06	8021645	7.29719e+06	23695598	16476568	8446033	14559664	8233839	17209096	17780772	19951622	8644504	22683244	9097800	10184768	13647322	15428209	13434762	12713817	11131599	10348353	9705298	11635532	15633641	13162173
15632934	95	PE(22:0/15:1(9Z))	C42H82NO8P	None	None	11490649	10223000	12655984	11301796	11745253	8551020	9518585	13292233	1.13962e+07	12538121	11820092	15334299	8.14181e+06	16300107	25103716	9560835	11930092	1.22341e+07	6645029	5.23533e+06	8021645	7.29719e+06	23695598	16476568	8446033	14559664	8233839	17209096	17780772	19951622	8644504	22683244	9097800	10184768	13647322	15428209	13434762	12713817	11131599	10348353	9705298	11635532	15633641	13162173
15632935	95	PC(16:0/18:1(11E))	C42H82NO8P	None	None	11490649	10223000	12655984	11301796	11745253	8551020	9518585	13292233	1.13962e+07	12538121	11820092	15334299	8.14181e+06	16300107	25103716	9560835	11930092	1.22341e+07	6645029	5.23533e+06	8021645	7.29719e+06	23695598	16476568	8446033	14559664	8233839	17209096	17780772	19951622	8644504	22683244	9097800	10184768	13647322	15428209	13434762	12713817	11131599	10348353	9705298	11635532	15633641	13162173
15632936	95	PC(16:0/18:1(6Z))	C42H82NO8P	None	None	11490649	10223000	12655984	11301796	11745253	8551020	9518585	13292233	1.13962e+07	12538121	11820092	15334299	8.14181e+06	16300107	25103716	9560835	11930092	1.22341e+07	6645029	5.23533e+06	8021645	7.29719e+06	23695598	16476568	8446033	14559664	8233839	17209096	17780772	19951622	8644504	22683244	9097800	10184768	13647322	15428209	13434762	12713817	11131599	10348353	9705298	11635532	15633641	13162173
15632937	95	PC(16:0/18:1(6E))	C42H82NO8P	None	None	11490649	10223000	12655984	11301796	11745253	8551020	9518585	13292233	1.13962e+07	12538121	11820092	15334299	8.14181e+06	16300107	25103716	9560835	11930092	1.22341e+07	6645029	5.23533e+06	8021645	7.29719e+06	23695598	16476568	8446033	14559664	8233839	17209096	17780772	19951622	8644504	22683244	9097800	10184768	13647322	15428209	13434762	12713817	11131599	10348353	9705298	11635532	15633641	13162173
15632938	95	PC(16:0/18:1(9E))	C42H82NO8P	None	None	11490649	10223000	12655984	11301796	11745253	8551020	9518585	13292233	1.13962e+07	12538121	11820092	15334299	8.14181e+06	16300107	25103716	9560835	11930092	1.22341e+07	6645029	5.23533e+06	8021645	7.29719e+06	23695598	16476568	8446033	14559664	8233839	17209096	17780772	19951622	8644504	22683244	9097800	10184768	13647322	15428209	13434762	12713817	11131599	10348353	9705298	11635532	15633641	13162173
15632939	95	PC(12:0/22:1(11Z))	C42H82NO8P	None	None	11490649	10223000	12655984	11301796	11745253	8551020	9518585	13292233	1.13962e+07	12538121	11820092	15334299	8.14181e+06	16300107	25103716	9560835	11930092	1.22341e+07	6645029	5.23533e+06	8021645	7.29719e+06	23695598	16476568	8446033	14559664	8233839	17209096	17780772	19951622	8644504	22683244	9097800	10184768	13647322	15428209	13434762	12713817	11131599	10348353	9705298	11635532	15633641	13162173
15632940	95	PC(17:1(9Z)/17:0)	C42H82NO8P	None	None	11490649	10223000	12655984	11301796	11745253	8551020	9518585	13292233	1.13962e+07	12538121	11820092	15334299	8.14181e+06	16300107	25103716	9560835	11930092	1.22341e+07	6645029	5.23533e+06	8021645	7.29719e+06	23695598	16476568	8446033	14559664	8233839	17209096	17780772	19951622	8644504	22683244	9097800	10184768	13647322	15428209	13434762	12713817	11131599	10348353	9705298	11635532	15633641	13162173
15632941	95	PC(17:0/17:1(9Z))	C42H82NO8P	None	None	11490649	10223000	12655984	11301796	11745253	8551020	9518585	13292233	1.13962e+07	12538121	11820092	15334299	8.14181e+06	16300107	25103716	9560835	11930092	1.22341e+07	6645029	5.23533e+06	8021645	7.29719e+06	23695598	16476568	8446033	14559664	8233839	17209096	17780772	19951622	8644504	22683244	9097800	10184768	13647322	15428209	13434762	12713817	11131599	10348353	9705298	11635532	15633641	13162173
15632942	95	PC(15:0/19:1(9Z))	C42H82NO8P	None	None	11490649	10223000	12655984	11301796	11745253	8551020	9518585	13292233	1.13962e+07	12538121	11820092	15334299	8.14181e+06	16300107	25103716	9560835	11930092	1.22341e+07	6645029	5.23533e+06	8021645	7.29719e+06	23695598	16476568	8446033	14559664	8233839	17209096	17780772	19951622	8644504	22683244	9097800	10184768	13647322	15428209	13434762	12713817	11131599	10348353	9705298	11635532	15633641	13162173
15632943	95	PC(15:1(9Z)/19:0)	C42H82NO8P	None	None	11490649	10223000	12655984	11301796	11745253	8551020	9518585	13292233	1.13962e+07	12538121	11820092	15334299	8.14181e+06	16300107	25103716	9560835	11930092	1.22341e+07	6645029	5.23533e+06	8021645	7.29719e+06	23695598	16476568	8446033	14559664	8233839	17209096	17780772	19951622	8644504	22683244	9097800	10184768	13647322	15428209	13434762	12713817	11131599	10348353	9705298	11635532	15633641	13162173
15632944	95	PE(18:1(9Z)/19:0)	C42H82NO8P	None	None	11490649	10223000	12655984	11301796	11745253	8551020	9518585	13292233	1.13962e+07	12538121	11820092	15334299	8.14181e+06	16300107	25103716	9560835	11930092	1.22341e+07	6645029	5.23533e+06	8021645	7.29719e+06	23695598	16476568	8446033	14559664	8233839	17209096	17780772	19951622	8644504	22683244	9097800	10184768	13647322	15428209	13434762	12713817	11131599	10348353	9705298	11635532	15633641	13162173
15632945	95	PE(18:0/19:1(9Z))	C42H82NO8P	None	None	11490649	10223000	12655984	11301796	11745253	8551020	9518585	13292233	1.13962e+07	12538121	11820092	15334299	8.14181e+06	16300107	25103716	9560835	11930092	1.22341e+07	6645029	5.23533e+06	8021645	7.29719e+06	23695598	16476568	8446033	14559664	8233839	17209096	17780772	19951622	8644504	22683244	9097800	10184768	13647322	15428209	13434762	12713817	11131599	10348353	9705298	11635532	15633641	13162173
15632946	95	PE(19:0/18:1(9Z))	C42H82NO8P	None	None	11490649	10223000	12655984	11301796	11745253	8551020	9518585	13292233	1.13962e+07	12538121	11820092	15334299	8.14181e+06	16300107	25103716	9560835	11930092	1.22341e+07	6645029	5.23533e+06	8021645	7.29719e+06	23695598	16476568	8446033	14559664	8233839	17209096	17780772	19951622	8644504	22683244	9097800	10184768	13647322	15428209	13434762	12713817	11131599	10348353	9705298	11635532	15633641	13162173
15632947	95	PE(15:0/22:1(11Z))	C42H82NO8P	None	None	11490649	10223000	12655984	11301796	11745253	8551020	9518585	13292233	1.13962e+07	12538121	11820092	15334299	8.14181e+06	16300107	25103716	9560835	11930092	1.22341e+07	6645029	5.23533e+06	8021645	7.29719e+06	23695598	16476568	8446033	14559664	8233839	17209096	17780772	19951622	8644504	22683244	9097800	10184768	13647322	15428209	13434762	12713817	11131599	10348353	9705298	11635532	15633641	13162173
15632948	95	PE(16:1(9Z)/21:0)	C42H82NO8P	None	None	11490649	10223000	12655984	11301796	11745253	8551020	9518585	13292233	1.13962e+07	12538121	11820092	15334299	8.14181e+06	16300107	25103716	9560835	11930092	1.22341e+07	6645029	5.23533e+06	8021645	7.29719e+06	23695598	16476568	8446033	14559664	8233839	17209096	17780772	19951622	8644504	22683244	9097800	10184768	13647322	15428209	13434762	12713817	11131599	10348353	9705298	11635532	15633641	13162173
15632949	95	PE(17:0/20:1(11Z))	C42H82NO8P	None	None	11490649	10223000	12655984	11301796	11745253	8551020	9518585	13292233	1.13962e+07	12538121	11820092	15334299	8.14181e+06	16300107	25103716	9560835	11930092	1.22341e+07	6645029	5.23533e+06	8021645	7.29719e+06	23695598	16476568	8446033	14559664	8233839	17209096	17780772	19951622	8644504	22683244	9097800	10184768	13647322	15428209	13434762	12713817	11131599	10348353	9705298	11635532	15633641	13162173
15632950	95	PE(17:1(9Z)/20:0)	C42H82NO8P	None	None	11490649	10223000	12655984	11301796	11745253	8551020	9518585	13292233	1.13962e+07	12538121	11820092	15334299	8.14181e+06	16300107	25103716	9560835	11930092	1.22341e+07	6645029	5.23533e+06	8021645	7.29719e+06	23695598	16476568	8446033	14559664	8233839	17209096	17780772	19951622	8644504	22683244	9097800	10184768	13647322	15428209	13434762	12713817	11131599	10348353	9705298	11635532	15633641	13162173
15632951	95	PE(15:1(9Z)/22:0)	C42H82NO8P	None	None	11490649	10223000	12655984	11301796	11745253	8551020	9518585	13292233	1.13962e+07	12538121	11820092	15334299	8.14181e+06	16300107	25103716	9560835	11930092	1.22341e+07	6645029	5.23533e+06	8021645	7.29719e+06	23695598	16476568	8446033	14559664	8233839	17209096	17780772	19951622	8644504	22683244	9097800	10184768	13647322	15428209	13434762	12713817	11131599	10348353	9705298	11635532	15633641	13162173
15632952	95	PC(19:1(9Z)/15:0)	C42H82NO8P	None	None	11490649	10223000	12655984	11301796	11745253	8551020	9518585	13292233	1.13962e+07	12538121	11820092	15334299	8.14181e+06	16300107	25103716	9560835	11930092	1.22341e+07	6645029	5.23533e+06	8021645	7.29719e+06	23695598	16476568	8446033	14559664	8233839	17209096	17780772	19951622	8644504	22683244	9097800	10184768	13647322	15428209	13434762	12713817	11131599	10348353	9705298	11635532	15633641	13162173
15632953	95	PC(19:0/15:1(9Z))	C42H82NO8P	None	None	11490649	10223000	12655984	11301796	11745253	8551020	9518585	13292233	1.13962e+07	12538121	11820092	15334299	8.14181e+06	16300107	25103716	9560835	11930092	1.22341e+07	6645029	5.23533e+06	8021645	7.29719e+06	23695598	16476568	8446033	14559664	8233839	17209096	17780772	19951622	8644504	22683244	9097800	10184768	13647322	15428209	13434762	12713817	11131599	10348353	9705298	11635532	15633641	13162173
15632954	95	PE(19:1(9Z)/18:0)	C42H82NO8P	None	None	11490649	10223000	12655984	11301796	11745253	8551020	9518585	13292233	1.13962e+07	12538121	11820092	15334299	8.14181e+06	16300107	25103716	9560835	11930092	1.22341e+07	6645029	5.23533e+06	8021645	7.29719e+06	23695598	16476568	8446033	14559664	8233839	17209096	17780772	19951622	8644504	22683244	9097800	10184768	13647322	15428209	13434762	12713817	11131599	10348353	9705298	11635532	15633641	13162173
15632955	95	PE(20:0/17:1(9Z))	C42H82NO8P	None	None	11490649	10223000	12655984	11301796	11745253	8551020	9518585	13292233	1.13962e+07	12538121	11820092	15334299	8.14181e+06	16300107	25103716	9560835	11930092	1.22341e+07	6645029	5.23533e+06	8021645	7.29719e+06	23695598	16476568	8446033	14559664	8233839	17209096	17780772	19951622	8644504	22683244	9097800	10184768	13647322	15428209	13434762	12713817	11131599	10348353	9705298	11635532	15633641	13162173
15632956	95	PE(20:1(11Z)/17:0)	C42H82NO8P	None	None	11490649	10223000	12655984	11301796	11745253	8551020	9518585	13292233	1.13962e+07	12538121	11820092	15334299	8.14181e+06	16300107	25103716	9560835	11930092	1.22341e+07	6645029	5.23533e+06	8021645	7.29719e+06	23695598	16476568	8446033	14559664	8233839	17209096	17780772	19951622	8644504	22683244	9097800	10184768	13647322	15428209	13434762	12713817	11131599	10348353	9705298	11635532	15633641	13162173
15632957	95	PE(21:0/16:1(9Z))	C42H82NO8P	None	None	11490649	10223000	12655984	11301796	11745253	8551020	9518585	13292233	1.13962e+07	12538121	11820092	15334299	8.14181e+06	16300107	25103716	9560835	11930092	1.22341e+07	6645029	5.23533e+06	8021645	7.29719e+06	23695598	16476568	8446033	14559664	8233839	17209096	17780772	19951622	8644504	22683244	9097800	10184768	13647322	15428209	13434762	12713817	11131599	10348353	9705298	11635532	15633641	13162173
15632988	119	3beta,6beta-Dihydroxynortropane	C7H13NO2	None	None	3115833	2.81607e+06	1.0026e+06	12684520	1.48024e+06	1.09527e+06	1.02375e+06	556079	1.28776e+06	24854000	18994994	8490336	4.82888e+06	1.554e+06	1.18179e+06	1.08388e+06	664752	3.19144e+06	8.18615e+06	6008488	520016	4548878	8370944	5.67613e+06	6.32065e+06	13465241	6.16457e+06	1.76495e+06	1.74581e+06	616211	1.17657e+06	1.61961e+06	1.22914e+06	635859	1.857e+06	1.42437e+06	22583746	15147661	3478042	2.48722e+06	1.46778e+06	2492482	1.72437e+06	6991240
15632989	119	Stachydrine	C7H13NO2	None	None	3115833	2.81607e+06	1.0026e+06	12684520	1.48024e+06	1.09527e+06	1.02375e+06	556079	1.28776e+06	24854000	18994994	8490336	4.82888e+06	1.554e+06	1.18179e+06	1.08388e+06	664752	3.19144e+06	8.18615e+06	6008488	520016	4548878	8370944	5.67613e+06	6.32065e+06	13465241	6.16457e+06	1.76495e+06	1.74581e+06	616211	1.17657e+06	1.61961e+06	1.22914e+06	635859	1.857e+06	1.42437e+06	22583746	15147661	3478042	2.48722e+06	1.46778e+06	2492482	1.72437e+06	6991240
15632995	119	L-2-Amino-3-methylenehexanoic acid	C7H13NO2	None	None	3115833	2.81607e+06	1.0026e+06	12684520	1.48024e+06	1.09527e+06	1.02375e+06	556079	1.28776e+06	24854000	18994994	8490336	4.82888e+06	1.554e+06	1.18179e+06	1.08388e+06	664752	3.19144e+06	8.18615e+06	6008488	520016	4548878	8370944	5.67613e+06	6.32065e+06	13465241	6.16457e+06	1.76495e+06	1.74581e+06	616211	1.17657e+06	1.61961e+06	1.22914e+06	635859	1.857e+06	1.42437e+06	22583746	15147661	3478042	2.48722e+06	1.46778e+06	2492482	1.72437e+06	6991240
15633006	119	4-(Trimethylammonio)but-2-enoate	C7H13NO2	Environmental Information Processing; Membrane transport	ABC transporters	3115833	2.81607e+06	1.0026e+06	12684520	1.48024e+06	1.09527e+06	1.02375e+06	556079	1.28776e+06	24854000	18994994	8490336	4.82888e+06	1.554e+06	1.18179e+06	1.08388e+06	664752	3.19144e+06	8.18615e+06	6008488	520016	4548878	8370944	5.67613e+06	6.32065e+06	13465241	6.16457e+06	1.76495e+06	1.74581e+06	616211	1.17657e+06	1.61961e+06	1.22914e+06	635859	1.857e+06	1.42437e+06	22583746	15147661	3478042	2.48722e+06	1.46778e+06	2492482	1.72437e+06	6991240
15633074	126	L-Acetylcarnitine	C9H17NO4	None	None	1.94525e+06	2.98675e+06	2905810	2490889	3.51657e+06	2.28191e+06	3.21935e+06	4.57969e+06	2.94628e+06	3.04528e+06	3359072	3.35809e+06	2811427	7.43192e+06	11800448	3.49544e+06	4.42646e+06	3.42726e+06	3.57338e+06	3.93832e+06	3.80938e+06	2.58894e+06	14823132	15294279	2.44821e+06	9073362	3.87385e+06	7982922	20423296	2.8189e+06	2.2037e+06	6146689	1893404	5.00225e+06	10640967	5.57447e+06	3.84701e+06	3634785	3.75525e+06	2.75643e+06	2171780	2951979	2303680	3002805
15633077	126	N-lactoyl-Leucine	C9H17NO4	None	None	1.94525e+06	2.98675e+06	2905810	2490889	3.51657e+06	2.28191e+06	3.21935e+06	4.57969e+06	2.94628e+06	3.04528e+06	3359072	3.35809e+06	2811427	7.43192e+06	11800448	3.49544e+06	4.42646e+06	3.42726e+06	3.57338e+06	3.93832e+06	3.80938e+06	2.58894e+06	14823132	15294279	2.44821e+06	9073362	3.87385e+06	7982922	20423296	2.8189e+06	2.2037e+06	6146689	1893404	5.00225e+06	10640967	5.57447e+06	3.84701e+06	3634785	3.75525e+06	2.75643e+06	2171780	2951979	2303680	3002805
15633080	126	O-Acetylcarnitine	C9H17NO4	None	None	1.94525e+06	2.98675e+06	2905810	2490889	3.51657e+06	2.28191e+06	3.21935e+06	4.57969e+06	2.94628e+06	3.04528e+06	3359072	3.35809e+06	2811427	7.43192e+06	11800448	3.49544e+06	4.42646e+06	3.42726e+06	3.57338e+06	3.93832e+06	3.80938e+06	2.58894e+06	14823132	15294279	2.44821e+06	9073362	3.87385e+06	7982922	20423296	2.8189e+06	2.2037e+06	6146689	1893404	5.00225e+06	10640967	5.57447e+06	3.84701e+06	3634785	3.75525e+06	2.75643e+06	2171780	2951979	2303680	3002805
15633161	129	Methyl N-methylanthranilate	C9H11NO2	None	None	12903943	12872015	12327500	16091009	15690731	13498795	13143729	11142012	13023836	11460162	15211519	11055407	15106990	17000156	16893810	14158220	10419674	14632605	11377625	14765889	13608891	17050752	12939730	10407116	15998052	13028859	13318875	11205256	17711296	13878498	12431431	15704865	10870423	9020573	13586964	1.30092e+07	13841938	13030749	11053668	11162401	11097082	10589469	10867413	10951577
15633162	129	L-Phenylalanine	C9H11NO2	Metabolism; Amino acid metabolism Metabolism; Biosynthesis of other secondary metabolites Genetic Information Processing; Translation Organismal Systems; Digestive system Metabolism; Biosynthesis of other secondary metabolites Environmental Information Processing; Membrane transport Metabolism; Amino acid metabolism Metabolism; Biosynthesis of other secondary metabolites Organismal Systems; Diges…	Phenylalanine metabolism Tropane, piperidine and pyridine alkaloid biosynthesis Aminoacyl-tRNA biosynthesis Protein digestion and absorption Glucosinolate biosynthesis ABC transporters Phenylalanine, tyrosine and tryptophan biosynthesis Phenylpropanoid biosynthesis Mineral absorption Cyanoamino acid metabolism	12903943	12872015	12327500	16091009	15690731	13498795	13143729	11142012	13023836	11460162	15211519	11055407	15106990	17000156	16893810	14158220	10419674	14632605	11377625	14765889	13608891	17050752	12939730	10407116	15998052	13028859	13318875	11205256	17711296	13878498	12431431	15704865	10870423	9020573	13586964	1.30092e+07	13841938	13030749	11053668	11162401	11097082	10589469	10867413	10951577
15633164	129	Benzocaine	C9H11NO2	None	None	12903943	12872015	12327500	16091009	15690731	13498795	13143729	11142012	13023836	11460162	15211519	11055407	15106990	17000156	16893810	14158220	10419674	14632605	11377625	14765889	13608891	17050752	12939730	10407116	15998052	13028859	13318875	11205256	17711296	13878498	12431431	15704865	10870423	9020573	13586964	1.30092e+07	13841938	13030749	11053668	11162401	11097082	10589469	10867413	10951577
15633165	129	Benzyl glycinate	C9H11NO2	None	None	12903943	12872015	12327500	16091009	15690731	13498795	13143729	11142012	13023836	11460162	15211519	11055407	15106990	17000156	16893810	14158220	10419674	14632605	11377625	14765889	13608891	17050752	12939730	10407116	15998052	13028859	13318875	11205256	17711296	13878498	12431431	15704865	10870423	9020573	13586964	1.30092e+07	13841938	13030749	11053668	11162401	11097082	10589469	10867413	10951577
15633166	129	Norsalsolinol	C9H11NO2	None	None	12903943	12872015	12327500	16091009	15690731	13498795	13143729	11142012	13023836	11460162	15211519	11055407	15106990	17000156	16893810	14158220	10419674	14632605	11377625	14765889	13608891	17050752	12939730	10407116	15998052	13028859	13318875	11205256	17711296	13878498	12431431	15704865	10870423	9020573	13586964	1.30092e+07	13841938	13030749	11053668	11162401	11097082	10589469	10867413	10951577
15633172	129	3-Pyridinebutanoic acid	C9H11NO2	None	None	12903943	12872015	12327500	16091009	15690731	13498795	13143729	11142012	13023836	11460162	15211519	11055407	15106990	17000156	16893810	14158220	10419674	14632605	11377625	14765889	13608891	17050752	12939730	10407116	15998052	13028859	13318875	11205256	17711296	13878498	12431431	15704865	10870423	9020573	13586964	1.30092e+07	13841938	13030749	11053668	11162401	11097082	10589469	10867413	10951577
15633175	129	Gentiatibetine	C9H11NO2	None	None	12903943	12872015	12327500	16091009	15690731	13498795	13143729	11142012	13023836	11460162	15211519	11055407	15106990	17000156	16893810	14158220	10419674	14632605	11377625	14765889	13608891	17050752	12939730	10407116	15998052	13028859	13318875	11205256	17711296	13878498	12431431	15704865	10870423	9020573	13586964	1.30092e+07	13841938	13030749	11053668	11162401	11097082	10589469	10867413	10951577
15633176	129	Ethyl 2-aminobenzoate	C9H11NO2	None	None	12903943	12872015	12327500	16091009	15690731	13498795	13143729	11142012	13023836	11460162	15211519	11055407	15106990	17000156	16893810	14158220	10419674	14632605	11377625	14765889	13608891	17050752	12939730	10407116	15998052	13028859	13318875	11205256	17711296	13878498	12431431	15704865	10870423	9020573	13586964	1.30092e+07	13841938	13030749	11053668	11162401	11097082	10589469	10867413	10951577
15633177	129	4-Hydroxy-1-(3-pyridinyl)-1-butanone	C9H11NO2	Metabolism; Xenobiotics biodegradation and metabolism Human Diseases; Cancers	Metabolism of xenobiotics by cytochrome P450 Chemical carcinogenesis	12903943	12872015	12327500	16091009	15690731	13498795	13143729	11142012	13023836	11460162	15211519	11055407	15106990	17000156	16893810	14158220	10419674	14632605	11377625	14765889	13608891	17050752	12939730	10407116	15998052	13028859	13318875	11205256	17711296	13878498	12431431	15704865	10870423	9020573	13586964	1.30092e+07	13841938	13030749	11053668	11162401	11097082	10589469	10867413	10951577
15633178	129	5-(3-Pyridyl)-2-hydroxytetrahydrofuran	C9H11NO2	Metabolism; Xenobiotics biodegradation and metabolism Human Diseases; Cancers	Metabolism of xenobiotics by cytochrome P450 Chemical carcinogenesis	12903943	12872015	12327500	16091009	15690731	13498795	13143729	11142012	13023836	11460162	15211519	11055407	15106990	17000156	16893810	14158220	10419674	14632605	11377625	14765889	13608891	17050752	12939730	10407116	15998052	13028859	13318875	11205256	17711296	13878498	12431431	15704865	10870423	9020573	13586964	1.30092e+07	13841938	13030749	11053668	11162401	11097082	10589469	10867413	10951577
15633180	129	Metolcarb	C9H11NO2	None	None	12903943	12872015	12327500	16091009	15690731	13498795	13143729	11142012	13023836	11460162	15211519	11055407	15106990	17000156	16893810	14158220	10419674	14632605	11377625	14765889	13608891	17050752	12939730	10407116	15998052	13028859	13318875	11205256	17711296	13878498	12431431	15704865	10870423	9020573	13586964	1.30092e+07	13841938	13030749	11053668	11162401	11097082	10589469	10867413	10951577
15633181	129	D-beta-Phenylalanine	C9H11NO2	None	None	12903943	12872015	12327500	16091009	15690731	13498795	13143729	11142012	13023836	11460162	15211519	11055407	15106990	17000156	16893810	14158220	10419674	14632605	11377625	14765889	13608891	17050752	12939730	10407116	15998052	13028859	13318875	11205256	17711296	13878498	12431431	15704865	10870423	9020573	13586964	1.30092e+07	13841938	13030749	11053668	11162401	11097082	10589469	10867413	10951577
15633182	129	L-beta-Phenylalanine	C9H11NO2	None	None	12903943	12872015	12327500	16091009	15690731	13498795	13143729	11142012	13023836	11460162	15211519	11055407	15106990	17000156	16893810	14158220	10419674	14632605	11377625	14765889	13608891	17050752	12939730	10407116	15998052	13028859	13318875	11205256	17711296	13878498	12431431	15704865	10870423	9020573	13586964	1.30092e+07	13841938	13030749	11053668	11162401	11097082	10589469	10867413	10951577
15633183	129	Tricaine	C9H11NO2	None	None	12903943	12872015	12327500	16091009	15690731	13498795	13143729	11142012	13023836	11460162	15211519	11055407	15106990	17000156	16893810	14158220	10419674	14632605	11377625	14765889	13608891	17050752	12939730	10407116	15998052	13028859	13318875	11205256	17711296	13878498	12431431	15704865	10870423	9020573	13586964	1.30092e+07	13841938	13030749	11053668	11162401	11097082	10589469	10867413	10951577
15633186	129	D-Phenylalanine	C9H11NO2	Metabolism; Amino acid metabolism	Phenylalanine metabolism	12903943	12872015	12327500	16091009	15690731	13498795	13143729	11142012	13023836	11460162	15211519	11055407	15106990	17000156	16893810	14158220	10419674	14632605	11377625	14765889	13608891	17050752	12939730	10407116	15998052	13028859	13318875	11205256	17711296	13878498	12431431	15704865	10870423	9020573	13586964	1.30092e+07	13841938	13030749	11053668	11162401	11097082	10589469	10867413	10951577
15633187	129	Phenylalanine	C9H11NO2	None	None	12903943	12872015	12327500	16091009	15690731	13498795	13143729	11142012	13023836	11460162	15211519	11055407	15106990	17000156	16893810	14158220	10419674	14632605	11377625	14765889	13608891	17050752	12939730	10407116	15998052	13028859	13318875	11205256	17711296	13878498	12431431	15704865	10870423	9020573	13586964	1.30092e+07	13841938	13030749	11053668	11162401	11097082	10589469	10867413	10951577
15633190	130	SM(d18:1/16:0)	C39H79N2O6P	None	None	12385035	13195395	12880446	11293059	13274835	11096807	11265972	11275605	11839047	11690726	12068284	11948212	10178292	13369038	8541383	11258083	10373821	1.14744e+07	9048911	10080737	9041845	10406573	9624754	13655385	10669397	13365582	10243655	12999927	8926140	11980719	9909897	17560082	11700571	10862286	14244772	11840645	12093506	13771104	11333946	12177863	13114446	14245246	13424177	12192942
15633191	130	SM(d18:0/16:1(9Z))	C39H79N2O6P	None	None	12385035	13195395	12880446	11293059	13274835	11096807	11265972	11275605	11839047	11690726	12068284	11948212	10178292	13369038	8541383	11258083	10373821	1.14744e+07	9048911	10080737	9041845	10406573	9624754	13655385	10669397	13365582	10243655	12999927	8926140	11980719	9909897	17560082	11700571	10862286	14244772	11840645	12093506	13771104	11333946	12177863	13114446	14245246	13424177	12192942
15633192	130	PE-Cer(d15:1(4E)/22:0)	C39H79N2O6P	None	None	12385035	13195395	12880446	11293059	13274835	11096807	11265972	11275605	11839047	11690726	12068284	11948212	10178292	13369038	8541383	11258083	10373821	1.14744e+07	9048911	10080737	9041845	10406573	9624754	13655385	10669397	13365582	10243655	12999927	8926140	11980719	9909897	17560082	11700571	10862286	14244772	11840645	12093506	13771104	11333946	12177863	13114446	14245246	13424177	12192942
15633193	130	PE-Cer(d14:1(4E)/23:0)	C39H79N2O6P	None	None	12385035	13195395	12880446	11293059	13274835	11096807	11265972	11275605	11839047	11690726	12068284	11948212	10178292	13369038	8541383	11258083	10373821	1.14744e+07	9048911	10080737	9041845	10406573	9624754	13655385	10669397	13365582	10243655	12999927	8926140	11980719	9909897	17560082	11700571	10862286	14244772	11840645	12093506	13771104	11333946	12177863	13114446	14245246	13424177	12192942
15633194	130	PE-Cer(d16:1(4E)/21:0)	C39H79N2O6P	None	None	12385035	13195395	12880446	11293059	13274835	11096807	11265972	11275605	11839047	11690726	12068284	11948212	10178292	13369038	8541383	11258083	10373821	1.14744e+07	9048911	10080737	9041845	10406573	9624754	13655385	10669397	13365582	10243655	12999927	8926140	11980719	9909897	17560082	11700571	10862286	14244772	11840645	12093506	13771104	11333946	12177863	13114446	14245246	13424177	12192942
15633195	130	SM(d17:1/17:0)	C39H79N2O6P	None	None	12385035	13195395	12880446	11293059	13274835	11096807	11265972	11275605	11839047	11690726	12068284	11948212	10178292	13369038	8541383	11258083	10373821	1.14744e+07	9048911	10080737	9041845	10406573	9624754	13655385	10669397	13365582	10243655	12999927	8926140	11980719	9909897	17560082	11700571	10862286	14244772	11840645	12093506	13771104	11333946	12177863	13114446	14245246	13424177	12192942
15633196	130	SM(d16:1/18:0)	C39H79N2O6P	None	None	12385035	13195395	12880446	11293059	13274835	11096807	11265972	11275605	11839047	11690726	12068284	11948212	10178292	13369038	8541383	11258083	10373821	1.14744e+07	9048911	10080737	9041845	10406573	9624754	13655385	10669397	13365582	10243655	12999927	8926140	11980719	9909897	17560082	11700571	10862286	14244772	11840645	12093506	13771104	11333946	12177863	13114446	14245246	13424177	12192942
15633199	134	SM(d16:1/23:0)	C44H89N2O6P	None	None	213131	258078	286982	245124	275607	326366	305107	248795	266843	217046	238781	292802	281277	288124	132731	285594	219496	260029	233841	239223	236334	226783	179022	347868	262424	391149	237779	309766	157605	359253	253576	503486	299816	259729	364216	304791	308930	286720	302574	292138	233615	294943	240286	326901
15633200	134	SM(d18:1/21:0)	C44H89N2O6P	None	None	213131	258078	286982	245124	275607	326366	305107	248795	266843	217046	238781	292802	281277	288124	132731	285594	219496	260029	233841	239223	236334	226783	179022	347868	262424	391149	237779	309766	157605	359253	253576	503486	299816	259729	364216	304791	308930	286720	302574	292138	233615	294943	240286	326901
15633201	134	SM(d17:1/22:0)	C44H89N2O6P	None	None	213131	258078	286982	245124	275607	326366	305107	248795	266843	217046	238781	292802	281277	288124	132731	285594	219496	260029	233841	239223	236334	226783	179022	347868	262424	391149	237779	309766	157605	359253	253576	503486	299816	259729	364216	304791	308930	286720	302574	292138	233615	294943	240286	326901
15633202	134	SM(d20:1/19:0)	C44H89N2O6P	None	None	213131	258078	286982	245124	275607	326366	305107	248795	266843	217046	238781	292802	281277	288124	132731	285594	219496	260029	233841	239223	236334	226783	179022	347868	262424	391149	237779	309766	157605	359253	253576	503486	299816	259729	364216	304791	308930	286720	302574	292138	233615	294943	240286	326901
15633203	134	SM(d19:1/20:0)	C44H89N2O6P	None	None	213131	258078	286982	245124	275607	326366	305107	248795	266843	217046	238781	292802	281277	288124	132731	285594	219496	260029	233841	239223	236334	226783	179022	347868	262424	391149	237779	309766	157605	359253	253576	503486	299816	259729	364216	304791	308930	286720	302574	292138	233615	294943	240286	326901
15633205	137	SM(d19:0/24:1)	C48H97N2O6P	None	None	89782.7	130661	112031	101142	202019	154355	104987	126702	119367	81599.1	149048	102029	124502	114561	92738.1	116064	137284	115312	108412	119790	116401	122113	61742.4	113402	163629	130477	118095	96473.3	97959.7	193507	119678	149510	157891	140513	132781	136647	117909	163049	109019	128543	117713	113443	85620.9	101062
15633206	137	SM(d20:1/23:0)	C48H97N2O6P	None	None	89782.7	130661	112031	101142	202019	154355	104987	126702	119367	81599.1	149048	102029	124502	114561	92738.1	116064	137284	115312	108412	119790	116401	122113	61742.4	113402	163629	130477	118095	96473.3	97959.7	193507	119678	149510	157891	140513	132781	136647	117909	163049	109019	128543	117713	113443	85620.9	101062
15633207	137	SM(d19:1/24:0)	C48H97N2O6P	None	None	89782.7	130661	112031	101142	202019	154355	104987	126702	119367	81599.1	149048	102029	124502	114561	92738.1	116064	137284	115312	108412	119790	116401	122113	61742.4	113402	163629	130477	118095	96473.3	97959.7	193507	119678	149510	157891	140513	132781	136647	117909	163049	109019	128543	117713	113443	85620.9	101062
15633208	137	SM(d18:1/25:0)	C48H97N2O6P	None	None	89782.7	130661	112031	101142	202019	154355	104987	126702	119367	81599.1	149048	102029	124502	114561	92738.1	116064	137284	115312	108412	119790	116401	122113	61742.4	113402	163629	130477	118095	96473.3	97959.7	193507	119678	149510	157891	140513	132781	136647	117909	163049	109019	128543	117713	113443	85620.9	101062
15633360	206	L-Glutamate	C5H9NO4	Metabolism; Amino acid metabolism Organismal Systems; Nervous system Human Diseases; Substance dependence Organismal Systems; Nervous system Organismal Systems; Nervous system Metabolism; Metabolism of other amino acids Human Diseases; Neurodegenerative diseases Organismal Systems; Nervous system Environmental Information Processing; Membrane transport Environmental Information Processing; Signal…	Arginine and proline metabolism Synaptic vesicle cycle Amphetamine addiction Glutamatergic synapse Retrograde endocannabinoid signaling Taurine and hypotaurine metabolism Amyotrophic lateral sclerosis (ALS) Long-term potentiation ABC transporters Two-component system FoxO signaling pathway Proximal tubule bicarbonate reclamation Porphyrin and chlorophyll metabolism Alanine, aspartate and glutamat…	5.80809e+06	7.06151e+06	6.62278e+06	5990323	7638704	7.46656e+06	7101270	10406814	7.08139e+06	7.93689e+06	5.67973e+06	5.66756e+06	6009460	6.16445e+06	5.69839e+06	7310123	11250793	6.08696e+06	11493082	9309820	8845775	14076279	6796778	6265097	12129724	6.51872e+06	9.0778e+06	4.82738e+06	7.73812e+06	5.51663e+06	5040238	7986673	5599903	6.00351e+06	5257871	5.55827e+06	6833903	6684500	6720563	8773508	5.01219e+06	5387662	6.56391e+06	6916141
15633362	206	DL-Glutamate	C5H9NO4	Metabolism; Metabolism of other amino acids	Cyanoamino acid metabolism	5.80809e+06	7.06151e+06	6.62278e+06	5990323	7638704	7.46656e+06	7101270	10406814	7.08139e+06	7.93689e+06	5.67973e+06	5.66756e+06	6009460	6.16445e+06	5.69839e+06	7310123	11250793	6.08696e+06	11493082	9309820	8845775	14076279	6796778	6265097	12129724	6.51872e+06	9.0778e+06	4.82738e+06	7.73812e+06	5.51663e+06	5040238	7986673	5599903	6.00351e+06	5257871	5.55827e+06	6833903	6684500	6720563	8773508	5.01219e+06	5387662	6.56391e+06	6916141
15633363	206	N-Acetylserine	C5H9NO4	None	None	5.80809e+06	7.06151e+06	6.62278e+06	5990323	7638704	7.46656e+06	7101270	10406814	7.08139e+06	7.93689e+06	5.67973e+06	5.66756e+06	6009460	6.16445e+06	5.69839e+06	7310123	11250793	6.08696e+06	11493082	9309820	8845775	14076279	6796778	6265097	12129724	6.51872e+06	9.0778e+06	4.82738e+06	7.73812e+06	5.51663e+06	5040238	7986673	5599903	6.00351e+06	5257871	5.55827e+06	6833903	6684500	6720563	8773508	5.01219e+06	5387662	6.56391e+06	6916141
15633364	206	N-Methyl-D-aspartic acid	C5H9NO4	None	None	5.80809e+06	7.06151e+06	6.62278e+06	5990323	7638704	7.46656e+06	7101270	10406814	7.08139e+06	7.93689e+06	5.67973e+06	5.66756e+06	6009460	6.16445e+06	5.69839e+06	7310123	11250793	6.08696e+06	11493082	9309820	8845775	14076279	6796778	6265097	12129724	6.51872e+06	9.0778e+06	4.82738e+06	7.73812e+06	5.51663e+06	5040238	7986673	5599903	6.00351e+06	5257871	5.55827e+06	6833903	6684500	6720563	8773508	5.01219e+06	5387662	6.56391e+06	6916141
15633367	206	L-4-Hydroxyglutamate semialdehyde	C5H9NO4	Metabolism; Amino acid metabolism	Arginine and proline metabolism	5.80809e+06	7.06151e+06	6.62278e+06	5990323	7638704	7.46656e+06	7101270	10406814	7.08139e+06	7.93689e+06	5.67973e+06	5.66756e+06	6009460	6.16445e+06	5.69839e+06	7310123	11250793	6.08696e+06	11493082	9309820	8845775	14076279	6796778	6265097	12129724	6.51872e+06	9.0778e+06	4.82738e+06	7.73812e+06	5.51663e+06	5040238	7986673	5599903	6.00351e+06	5257871	5.55827e+06	6833903	6684500	6720563	8773508	5.01219e+06	5387662	6.56391e+06	6916141
15633368	206	3-(Carboxymethylamino)propanoic acid	C5H9NO4	None	None	5.80809e+06	7.06151e+06	6.62278e+06	5990323	7638704	7.46656e+06	7101270	10406814	7.08139e+06	7.93689e+06	5.67973e+06	5.66756e+06	6009460	6.16445e+06	5.69839e+06	7310123	11250793	6.08696e+06	11493082	9309820	8845775	14076279	6796778	6265097	12129724	6.51872e+06	9.0778e+06	4.82738e+06	7.73812e+06	5.51663e+06	5040238	7986673	5599903	6.00351e+06	5257871	5.55827e+06	6833903	6684500	6720563	8773508	5.01219e+06	5387662	6.56391e+06	6916141
15633369	206	N-lactoyl-Glycine	C5H9NO4	None	None	5.80809e+06	7.06151e+06	6.62278e+06	5990323	7638704	7.46656e+06	7101270	10406814	7.08139e+06	7.93689e+06	5.67973e+06	5.66756e+06	6009460	6.16445e+06	5.69839e+06	7310123	11250793	6.08696e+06	11493082	9309820	8845775	14076279	6796778	6265097	12129724	6.51872e+06	9.0778e+06	4.82738e+06	7.73812e+06	5.51663e+06	5040238	7986673	5599903	6.00351e+06	5257871	5.55827e+06	6833903	6684500	6720563	8773508	5.01219e+06	5387662	6.56391e+06	6916141
15633370	206	D-Glutamate	C5H9NO4	Metabolism; Metabolism of cofactors and vitamins Metabolism; Metabolism of other amino acids	Vitamin B6 metabolism D-Glutamine and D-glutamate metabolism	5.80809e+06	7.06151e+06	6.62278e+06	5990323	7638704	7.46656e+06	7101270	10406814	7.08139e+06	7.93689e+06	5.67973e+06	5.66756e+06	6009460	6.16445e+06	5.69839e+06	7310123	11250793	6.08696e+06	11493082	9309820	8845775	14076279	6796778	6265097	12129724	6.51872e+06	9.0778e+06	4.82738e+06	7.73812e+06	5.51663e+06	5040238	7986673	5599903	6.00351e+06	5257871	5.55827e+06	6833903	6684500	6720563	8773508	5.01219e+06	5387662	6.56391e+06	6916141
15633371	206	O-Acetyl-L-serine	C5H9NO4	Metabolism; Amino acid metabolism Metabolism; Metabolism of terpenoids and polyketides Metabolism; Energy metabolism	Cysteine and methionine metabolism Zeatin biosynthesis Sulfur metabolism	5.80809e+06	7.06151e+06	6.62278e+06	5990323	7638704	7.46656e+06	7101270	10406814	7.08139e+06	7.93689e+06	5.67973e+06	5.66756e+06	6009460	6.16445e+06	5.69839e+06	7310123	11250793	6.08696e+06	11493082	9309820	8845775	14076279	6796778	6265097	12129724	6.51872e+06	9.0778e+06	4.82738e+06	7.73812e+06	5.51663e+06	5040238	7986673	5599903	6.00351e+06	5257871	5.55827e+06	6833903	6684500	6720563	8773508	5.01219e+06	5387662	6.56391e+06	6916141
15633372	206	3-Aminopentanedioate	C5H9NO4	None	None	5.80809e+06	7.06151e+06	6.62278e+06	5990323	7638704	7.46656e+06	7101270	10406814	7.08139e+06	7.93689e+06	5.67973e+06	5.66756e+06	6009460	6.16445e+06	5.69839e+06	7310123	11250793	6.08696e+06	11493082	9309820	8845775	14076279	6796778	6265097	12129724	6.51872e+06	9.0778e+06	4.82738e+06	7.73812e+06	5.51663e+06	5040238	7986673	5599903	6.00351e+06	5257871	5.55827e+06	6833903	6684500	6720563	8773508	5.01219e+06	5387662	6.56391e+06	6916141
15633373	206	N-(Carboxymethyl)-D-alanine	C5H9NO4	None	None	5.80809e+06	7.06151e+06	6.62278e+06	5990323	7638704	7.46656e+06	7101270	10406814	7.08139e+06	7.93689e+06	5.67973e+06	5.66756e+06	6009460	6.16445e+06	5.69839e+06	7310123	11250793	6.08696e+06	11493082	9309820	8845775	14076279	6796778	6265097	12129724	6.51872e+06	9.0778e+06	4.82738e+06	7.73812e+06	5.51663e+06	5040238	7986673	5599903	6.00351e+06	5257871	5.55827e+06	6833903	6684500	6720563	8773508	5.01219e+06	5387662	6.56391e+06	6916141
15633374	206	L-threo-3-Methylaspartate	C5H9NO4	Metabolism; Carbohydrate metabolism	C5-Branched dibasic acid metabolism	5.80809e+06	7.06151e+06	6.62278e+06	5990323	7638704	7.46656e+06	7101270	10406814	7.08139e+06	7.93689e+06	5.67973e+06	5.66756e+06	6009460	6.16445e+06	5.69839e+06	7310123	11250793	6.08696e+06	11493082	9309820	8845775	14076279	6796778	6265097	12129724	6.51872e+06	9.0778e+06	4.82738e+06	7.73812e+06	5.51663e+06	5040238	7986673	5599903	6.00351e+06	5257871	5.55827e+06	6833903	6684500	6720563	8773508	5.01219e+06	5387662	6.56391e+06	6916141
15633375	206	2-Oxo-4-hydroxy-5-aminovalerate	C5H9NO4	Metabolism; Amino acid metabolism	Arginine and proline metabolism	5.80809e+06	7.06151e+06	6.62278e+06	5990323	7638704	7.46656e+06	7101270	10406814	7.08139e+06	7.93689e+06	5.67973e+06	5.66756e+06	6009460	6.16445e+06	5.69839e+06	7310123	11250793	6.08696e+06	11493082	9309820	8845775	14076279	6796778	6265097	12129724	6.51872e+06	9.0778e+06	4.82738e+06	7.73812e+06	5.51663e+06	5040238	7986673	5599903	6.00351e+06	5257871	5.55827e+06	6833903	6684500	6720563	8773508	5.01219e+06	5387662	6.56391e+06	6916141
15633394	218	Tranexamic acid	C8H15NO2	None	None	4.5313e+06	3794154	2.56301e+06	7.90164e+06	3.2839e+06	2.90023e+06	2.13176e+06	1.07079e+06	3092067	8.21749e+06	7171700	2308041	4805048	5.30401e+06	1.36602e+06	2.2637e+06	954177	3.55654e+06	4.66533e+06	5.63257e+06	1.72939e+06	4797653	5716705	5707570	5.92995e+06	4976579	5.30458e+06	2.26501e+06	8696261	2.10192e+06	2666826	2.76841e+06	1.58912e+06	793022	3136434	2.46592e+06	14031907	5.7046e+06	5361634	5991087	3.23842e+06	5284551	2625961	10034943
15633410	218	(S)-Homostachydrine	C8H15NO2	None	None	4.5313e+06	3794154	2.56301e+06	7.90164e+06	3.2839e+06	2.90023e+06	2.13176e+06	1.07079e+06	3092067	8.21749e+06	7171700	2308041	4805048	5.30401e+06	1.36602e+06	2.2637e+06	954177	3.55654e+06	4.66533e+06	5.63257e+06	1.72939e+06	4797653	5716705	5707570	5.92995e+06	4976579	5.30458e+06	2.26501e+06	8696261	2.10192e+06	2666826	2.76841e+06	1.58912e+06	793022	3136434	2.46592e+06	14031907	5.7046e+06	5361634	5991087	3.23842e+06	5284551	2625961	10034943
15633412	218	Homostachydrine	C8H15NO2	None	None	4.5313e+06	3794154	2.56301e+06	7.90164e+06	3.2839e+06	2.90023e+06	2.13176e+06	1.07079e+06	3092067	8.21749e+06	7171700	2308041	4805048	5.30401e+06	1.36602e+06	2.2637e+06	954177	3.55654e+06	4.66533e+06	5.63257e+06	1.72939e+06	4797653	5716705	5707570	5.92995e+06	4976579	5.30458e+06	2.26501e+06	8696261	2.10192e+06	2666826	2.76841e+06	1.58912e+06	793022	3136434	2.46592e+06	14031907	5.7046e+06	5361634	5991087	3.23842e+06	5284551	2625961	10034943
15633413	218	Lentiginosine	C8H15NO2	None	None	4.5313e+06	3794154	2.56301e+06	7.90164e+06	3.2839e+06	2.90023e+06	2.13176e+06	1.07079e+06	3092067	8.21749e+06	7171700	2308041	4805048	5.30401e+06	1.36602e+06	2.2637e+06	954177	3.55654e+06	4.66533e+06	5.63257e+06	1.72939e+06	4797653	5716705	5707570	5.92995e+06	4976579	5.30458e+06	2.26501e+06	8696261	2.10192e+06	2666826	2.76841e+06	1.58912e+06	793022	3136434	2.46592e+06	14031907	5.7046e+06	5361634	5991087	3.23842e+06	5284551	2625961	10034943
15633468	221	PC(20:2(11Z,14Z)/18:1(9Z))	C46H86NO8P	None	None	9923861	7622857	10096059	10548688	8112076	7.59431e+06	9158016	4603896	8635046	9981649	8007799	8782222	12130257	10066417	3.43045e+06	9816885	4252980	9.29955e+06	7156315	7.03915e+06	6159287	11105163	1.98528e+06	4.00661e+06	8552383	6.7395e+06	6.88933e+06	4.66377e+06	2112163	5.69359e+06	11660695	7706162	7.63785e+06	10174693	7.99708e+06	7.67201e+06	9876263	12467127	7996744	8.20605e+06	10700577	11226687	9001922	9909832
15633469	221	PC(20:2(11Z,14Z)/18:1(11Z))	C46H86NO8P	None	None	9923861	7622857	10096059	10548688	8112076	7.59431e+06	9158016	4603896	8635046	9981649	8007799	8782222	12130257	10066417	3.43045e+06	9816885	4252980	9.29955e+06	7156315	7.03915e+06	6159287	11105163	1.98528e+06	4.00661e+06	8552383	6.7395e+06	6.88933e+06	4.66377e+06	2112163	5.69359e+06	11660695	7706162	7.63785e+06	10174693	7.99708e+06	7.67201e+06	9876263	12467127	7996744	8.20605e+06	10700577	11226687	9001922	9909832
15633470	221	PC(20:1(11Z)/18:2(9Z,12Z))	C46H86NO8P	None	None	9923861	7622857	10096059	10548688	8112076	7.59431e+06	9158016	4603896	8635046	9981649	8007799	8782222	12130257	10066417	3.43045e+06	9816885	4252980	9.29955e+06	7156315	7.03915e+06	6159287	11105163	1.98528e+06	4.00661e+06	8552383	6.7395e+06	6.88933e+06	4.66377e+06	2112163	5.69359e+06	11660695	7706162	7.63785e+06	10174693	7.99708e+06	7.67201e+06	9876263	12467127	7996744	8.20605e+06	10700577	11226687	9001922	9909832
15633471	221	PC(20:3(5Z,8Z,11Z)/18:0)	C46H86NO8P	None	None	9923861	7622857	10096059	10548688	8112076	7.59431e+06	9158016	4603896	8635046	9981649	8007799	8782222	12130257	10066417	3.43045e+06	9816885	4252980	9.29955e+06	7156315	7.03915e+06	6159287	11105163	1.98528e+06	4.00661e+06	8552383	6.7395e+06	6.88933e+06	4.66377e+06	2112163	5.69359e+06	11660695	7706162	7.63785e+06	10174693	7.99708e+06	7.67201e+06	9876263	12467127	7996744	8.20605e+06	10700577	11226687	9001922	9909832
15633472	221	PC(20:3(8Z,11Z,14Z)/18:0)	C46H86NO8P	None	None	9923861	7622857	10096059	10548688	8112076	7.59431e+06	9158016	4603896	8635046	9981649	8007799	8782222	12130257	10066417	3.43045e+06	9816885	4252980	9.29955e+06	7156315	7.03915e+06	6159287	11105163	1.98528e+06	4.00661e+06	8552383	6.7395e+06	6.88933e+06	4.66377e+06	2112163	5.69359e+06	11660695	7706162	7.63785e+06	10174693	7.99708e+06	7.67201e+06	9876263	12467127	7996744	8.20605e+06	10700577	11226687	9001922	9909832
15633474	221	PC(22:2(13Z,16Z)/16:1(9Z))	C46H86NO8P	None	None	9923861	7622857	10096059	10548688	8112076	7.59431e+06	9158016	4603896	8635046	9981649	8007799	8782222	12130257	10066417	3.43045e+06	9816885	4252980	9.29955e+06	7156315	7.03915e+06	6159287	11105163	1.98528e+06	4.00661e+06	8552383	6.7395e+06	6.88933e+06	4.66377e+06	2112163	5.69359e+06	11660695	7706162	7.63785e+06	10174693	7.99708e+06	7.67201e+06	9876263	12467127	7996744	8.20605e+06	10700577	11226687	9001922	9909832
15633475	221	PC(18:0/20:3(8Z,11Z,14Z))	C46H86NO8P	None	None	9923861	7622857	10096059	10548688	8112076	7.59431e+06	9158016	4603896	8635046	9981649	8007799	8782222	12130257	10066417	3.43045e+06	9816885	4252980	9.29955e+06	7156315	7.03915e+06	6159287	11105163	1.98528e+06	4.00661e+06	8552383	6.7395e+06	6.88933e+06	4.66377e+06	2112163	5.69359e+06	11660695	7706162	7.63785e+06	10174693	7.99708e+06	7.67201e+06	9876263	12467127	7996744	8.20605e+06	10700577	11226687	9001922	9909832
15633476	221	PC(18:0/20:3(5Z,8Z,11Z))	C46H86NO8P	None	None	9923861	7622857	10096059	10548688	8112076	7.59431e+06	9158016	4603896	8635046	9981649	8007799	8782222	12130257	10066417	3.43045e+06	9816885	4252980	9.29955e+06	7156315	7.03915e+06	6159287	11105163	1.98528e+06	4.00661e+06	8552383	6.7395e+06	6.88933e+06	4.66377e+06	2112163	5.69359e+06	11660695	7706162	7.63785e+06	10174693	7.99708e+06	7.67201e+06	9876263	12467127	7996744	8.20605e+06	10700577	11226687	9001922	9909832
15633478	221	PC(16:1(9Z)/22:2(13Z,16Z))	C46H86NO8P	None	None	9923861	7622857	10096059	10548688	8112076	7.59431e+06	9158016	4603896	8635046	9981649	8007799	8782222	12130257	10066417	3.43045e+06	9816885	4252980	9.29955e+06	7156315	7.03915e+06	6159287	11105163	1.98528e+06	4.00661e+06	8552383	6.7395e+06	6.88933e+06	4.66377e+06	2112163	5.69359e+06	11660695	7706162	7.63785e+06	10174693	7.99708e+06	7.67201e+06	9876263	12467127	7996744	8.20605e+06	10700577	11226687	9001922	9909832
15633479	221	PC(18:1(11Z)/20:2(11Z,14Z))	C46H86NO8P	None	None	9923861	7622857	10096059	10548688	8112076	7.59431e+06	9158016	4603896	8635046	9981649	8007799	8782222	12130257	10066417	3.43045e+06	9816885	4252980	9.29955e+06	7156315	7.03915e+06	6159287	11105163	1.98528e+06	4.00661e+06	8552383	6.7395e+06	6.88933e+06	4.66377e+06	2112163	5.69359e+06	11660695	7706162	7.63785e+06	10174693	7.99708e+06	7.67201e+06	9876263	12467127	7996744	8.20605e+06	10700577	11226687	9001922	9909832
15633480	221	PC(18:1(9Z)/20:2(11Z,14Z))	C46H86NO8P	None	None	9923861	7622857	10096059	10548688	8112076	7.59431e+06	9158016	4603896	8635046	9981649	8007799	8782222	12130257	10066417	3.43045e+06	9816885	4252980	9.29955e+06	7156315	7.03915e+06	6159287	11105163	1.98528e+06	4.00661e+06	8552383	6.7395e+06	6.88933e+06	4.66377e+06	2112163	5.69359e+06	11660695	7706162	7.63785e+06	10174693	7.99708e+06	7.67201e+06	9876263	12467127	7996744	8.20605e+06	10700577	11226687	9001922	9909832
15633481	221	PC(18:3(6Z,9Z,12Z)/20:0)	C46H86NO8P	None	None	9923861	7622857	10096059	10548688	8112076	7.59431e+06	9158016	4603896	8635046	9981649	8007799	8782222	12130257	10066417	3.43045e+06	9816885	4252980	9.29955e+06	7156315	7.03915e+06	6159287	11105163	1.98528e+06	4.00661e+06	8552383	6.7395e+06	6.88933e+06	4.66377e+06	2112163	5.69359e+06	11660695	7706162	7.63785e+06	10174693	7.99708e+06	7.67201e+06	9876263	12467127	7996744	8.20605e+06	10700577	11226687	9001922	9909832
15633482	221	PC(18:2(9Z,12Z)/20:1(11Z))	C46H86NO8P	None	None	9923861	7622857	10096059	10548688	8112076	7.59431e+06	9158016	4603896	8635046	9981649	8007799	8782222	12130257	10066417	3.43045e+06	9816885	4252980	9.29955e+06	7156315	7.03915e+06	6159287	11105163	1.98528e+06	4.00661e+06	8552383	6.7395e+06	6.88933e+06	4.66377e+06	2112163	5.69359e+06	11660695	7706162	7.63785e+06	10174693	7.99708e+06	7.67201e+06	9876263	12467127	7996744	8.20605e+06	10700577	11226687	9001922	9909832
15633483	221	PC(18:3(9Z,12Z,15Z)/20:0)	C46H86NO8P	None	None	9923861	7622857	10096059	10548688	8112076	7.59431e+06	9158016	4603896	8635046	9981649	8007799	8782222	12130257	10066417	3.43045e+06	9816885	4252980	9.29955e+06	7156315	7.03915e+06	6159287	11105163	1.98528e+06	4.00661e+06	8552383	6.7395e+06	6.88933e+06	4.66377e+06	2112163	5.69359e+06	11660695	7706162	7.63785e+06	10174693	7.99708e+06	7.67201e+06	9876263	12467127	7996744	8.20605e+06	10700577	11226687	9001922	9909832
15633484	221	PC(20:0/18:3(9Z,12Z,15Z))	C46H86NO8P	None	None	9923861	7622857	10096059	10548688	8112076	7.59431e+06	9158016	4603896	8635046	9981649	8007799	8782222	12130257	10066417	3.43045e+06	9816885	4252980	9.29955e+06	7156315	7.03915e+06	6159287	11105163	1.98528e+06	4.00661e+06	8552383	6.7395e+06	6.88933e+06	4.66377e+06	2112163	5.69359e+06	11660695	7706162	7.63785e+06	10174693	7.99708e+06	7.67201e+06	9876263	12467127	7996744	8.20605e+06	10700577	11226687	9001922	9909832
15633485	221	PC(20:0/18:3(6Z,9Z,12Z))	C46H86NO8P	None	None	9923861	7622857	10096059	10548688	8112076	7.59431e+06	9158016	4603896	8635046	9981649	8007799	8782222	12130257	10066417	3.43045e+06	9816885	4252980	9.29955e+06	7156315	7.03915e+06	6159287	11105163	1.98528e+06	4.00661e+06	8552383	6.7395e+06	6.88933e+06	4.66377e+06	2112163	5.69359e+06	11660695	7706162	7.63785e+06	10174693	7.99708e+06	7.67201e+06	9876263	12467127	7996744	8.20605e+06	10700577	11226687	9001922	9909832
15633496	221	PE(22:2(13Z,16Z)/19:1(9Z))	C46H86NO8P	None	None	9923861	7622857	10096059	10548688	8112076	7.59431e+06	9158016	4603896	8635046	9981649	8007799	8782222	12130257	10066417	3.43045e+06	9816885	4252980	9.29955e+06	7156315	7.03915e+06	6159287	11105163	1.98528e+06	4.00661e+06	8552383	6.7395e+06	6.88933e+06	4.66377e+06	2112163	5.69359e+06	11660695	7706162	7.63785e+06	10174693	7.99708e+06	7.67201e+06	9876263	12467127	7996744	8.20605e+06	10700577	11226687	9001922	9909832
15633497	221	PE(21:0/20:3(8Z,11Z,14Z))	C46H86NO8P	None	None	9923861	7622857	10096059	10548688	8112076	7.59431e+06	9158016	4603896	8635046	9981649	8007799	8782222	12130257	10066417	3.43045e+06	9816885	4252980	9.29955e+06	7156315	7.03915e+06	6159287	11105163	1.98528e+06	4.00661e+06	8552383	6.7395e+06	6.88933e+06	4.66377e+06	2112163	5.69359e+06	11660695	7706162	7.63785e+06	10174693	7.99708e+06	7.67201e+06	9876263	12467127	7996744	8.20605e+06	10700577	11226687	9001922	9909832
15633499	221	PC(18:0/20:3(5Z,11Z,14Z))	C46H86NO8P	None	None	9923861	7622857	10096059	10548688	8112076	7.59431e+06	9158016	4603896	8635046	9981649	8007799	8782222	12130257	10066417	3.43045e+06	9816885	4252980	9.29955e+06	7156315	7.03915e+06	6159287	11105163	1.98528e+06	4.00661e+06	8552383	6.7395e+06	6.88933e+06	4.66377e+06	2112163	5.69359e+06	11660695	7706162	7.63785e+06	10174693	7.99708e+06	7.67201e+06	9876263	12467127	7996744	8.20605e+06	10700577	11226687	9001922	9909832
15633500	221	PC(18:0/20:3(5Z,8Z,14Z))	C46H86NO8P	None	None	9923861	7622857	10096059	10548688	8112076	7.59431e+06	9158016	4603896	8635046	9981649	8007799	8782222	12130257	10066417	3.43045e+06	9816885	4252980	9.29955e+06	7156315	7.03915e+06	6159287	11105163	1.98528e+06	4.00661e+06	8552383	6.7395e+06	6.88933e+06	4.66377e+06	2112163	5.69359e+06	11660695	7706162	7.63785e+06	10174693	7.99708e+06	7.67201e+06	9876263	12467127	7996744	8.20605e+06	10700577	11226687	9001922	9909832
15633501	221	PC(18:2(9Z,12Z)/20:1(13Z))	C46H86NO8P	None	None	9923861	7622857	10096059	10548688	8112076	7.59431e+06	9158016	4603896	8635046	9981649	8007799	8782222	12130257	10066417	3.43045e+06	9816885	4252980	9.29955e+06	7156315	7.03915e+06	6159287	11105163	1.98528e+06	4.00661e+06	8552383	6.7395e+06	6.88933e+06	4.66377e+06	2112163	5.69359e+06	11660695	7706162	7.63785e+06	10174693	7.99708e+06	7.67201e+06	9876263	12467127	7996744	8.20605e+06	10700577	11226687	9001922	9909832
15633511	221	PE(19:1(9Z)/22:2(13Z,16Z))	C46H86NO8P	None	None	9923861	7622857	10096059	10548688	8112076	7.59431e+06	9158016	4603896	8635046	9981649	8007799	8782222	12130257	10066417	3.43045e+06	9816885	4252980	9.29955e+06	7156315	7.03915e+06	6159287	11105163	1.98528e+06	4.00661e+06	8552383	6.7395e+06	6.88933e+06	4.66377e+06	2112163	5.69359e+06	11660695	7706162	7.63785e+06	10174693	7.99708e+06	7.67201e+06	9876263	12467127	7996744	8.20605e+06	10700577	11226687	9001922	9909832
15633514	221	PE(20:3(8Z,11Z,14Z)/21:0)	C46H86NO8P	None	None	9923861	7622857	10096059	10548688	8112076	7.59431e+06	9158016	4603896	8635046	9981649	8007799	8782222	12130257	10066417	3.43045e+06	9816885	4252980	9.29955e+06	7156315	7.03915e+06	6159287	11105163	1.98528e+06	4.00661e+06	8552383	6.7395e+06	6.88933e+06	4.66377e+06	2112163	5.69359e+06	11660695	7706162	7.63785e+06	10174693	7.99708e+06	7.67201e+06	9876263	12467127	7996744	8.20605e+06	10700577	11226687	9001922	9909832
15633515	223	L-Citrulline	C6H13N3O3	Metabolism; Amino acid metabolism	Arginine and proline metabolism	8485169	6.53213e+06	7927376	7.90045e+06	7.55372e+06	4587411	5292602	3206756	7.04293e+06	11441391	7172962	8056625	6.65953e+06	6.74006e+06	6106073	5330644	3.55232e+06	6.6998e+06	7.24574e+06	5903341	7.27271e+06	6.04619e+06	5.66767e+06	7491526	7.43395e+06	8829024	7.25922e+06	10264903	3.68265e+06	5060421	5.88882e+06	9069825	6.19532e+06	6.30312e+06	7892021	6.24922e+06	6.44783e+06	7.1492e+06	11724580	5980347	5.50918e+06	6551140	7796465	5.67541e+06
15633517	223	Argininic acid	C6H13N3O3	None	None	8485169	6.53213e+06	7927376	7.90045e+06	7.55372e+06	4587411	5292602	3206756	7.04293e+06	11441391	7172962	8056625	6.65953e+06	6.74006e+06	6106073	5330644	3.55232e+06	6.6998e+06	7.24574e+06	5903341	7.27271e+06	6.04619e+06	5.66767e+06	7491526	7.43395e+06	8829024	7.25922e+06	10264903	3.68265e+06	5060421	5.88882e+06	9069825	6.19532e+06	6.30312e+06	7892021	6.24922e+06	6.44783e+06	7.1492e+06	11724580	5980347	5.50918e+06	6551140	7796465	5.67541e+06
15633521	228	gamma-Glutamyl-beta-aminopropiononitrile	C8H13N3O3	Metabolism; Metabolism of other amino acids	Cyanoamino acid metabolism	97517.8	75949.3	95984.5	111909	92097.6	59717.6	69422.2	41615.3	84023.4	124995	85408.1	94917.6	75441.9	75427.1	81296.9	75440.4	42855.9	78369.4	85022.8	60446.6	92092.4	77545.1	76835.2	87374.4	82118.6	114961	83570.7	132004	40171.3	54359.4	73698.4	103803	68094.2	77366.1	94682.7	75532.3	71565.6	75845.5	142700	73828.1	70011.8	79814.3	88084.9	72436.8
15633542	231	N-Isovaleryl-L-homoserine lactone	C9H15NO3	None	None	2.80853e+06	6316487	3.63141e+06	273952	4.4754e+06	4.46368e+06	4.45892e+06	2.69033e+06	4.04516e+06	774412	428768	224272	190378	2439310	264599	5.47409e+06	2.04829e+06	601590	2.9026e+06	6.2593e+06	5920911	165036	519240	3.74176e+06	299737	1822221	2.36241e+06	1.61145e+06	1.87407e+06	560839	2.39526e+06	3054525	2.44513e+06	7534598	3.80821e+06	2.4202e+06	189697	809850	1.18789e+06	3.67974e+06	4.36082e+06	1631185	2.49635e+06	2.92493e+06
15633543	233	DL-2-amino-octanoic acid	C8H17NO2	None	None	3.05311e+06	3.81704e+06	3421605	3802132	5.9292e+06	3.55396e+06	3657300	4.75872e+06	3729716	2763751	3.81604e+06	2.50473e+06	3.71944e+06	4464906	6891133	3.58154e+06	4.80026e+06	3.76774e+06	3.03521e+06	4.04083e+06	2.77422e+06	3.74948e+06	5.18271e+06	3.5793e+06	4.5978e+06	2.70203e+06	3.66439e+06	3.31789e+06	10868440	2624151	3.56978e+06	4521568	3.11258e+06	5113945	2388737	3.44383e+06	6.20639e+06	3.37094e+06	3565658	5962733	5271685	4.29709e+06	4.02043e+06	6183908
15633544	233	Pregabalin	C8H17NO2	None	None	3.05311e+06	3.81704e+06	3421605	3802132	5.9292e+06	3.55396e+06	3657300	4.75872e+06	3729716	2763751	3.81604e+06	2.50473e+06	3.71944e+06	4464906	6891133	3.58154e+06	4.80026e+06	3.76774e+06	3.03521e+06	4.04083e+06	2.77422e+06	3.74948e+06	5.18271e+06	3.5793e+06	4.5978e+06	2.70203e+06	3.66439e+06	3.31789e+06	10868440	2624151	3.56978e+06	4521568	3.11258e+06	5113945	2388737	3.44383e+06	6.20639e+06	3.37094e+06	3565658	5962733	5271685	4.29709e+06	4.02043e+06	6183908
15633549	233	3-amino-octanoic acid	C8H17NO2	None	None	3.05311e+06	3.81704e+06	3421605	3802132	5.9292e+06	3.55396e+06	3657300	4.75872e+06	3729716	2763751	3.81604e+06	2.50473e+06	3.71944e+06	4464906	6891133	3.58154e+06	4.80026e+06	3.76774e+06	3.03521e+06	4.04083e+06	2.77422e+06	3.74948e+06	5.18271e+06	3.5793e+06	4.5978e+06	2.70203e+06	3.66439e+06	3.31789e+06	10868440	2624151	3.56978e+06	4521568	3.11258e+06	5113945	2388737	3.44383e+06	6.20639e+06	3.37094e+06	3565658	5962733	5271685	4.29709e+06	4.02043e+06	6183908
15633550	234	Piperidine	C5H11N	Metabolism; Biosynthesis of other secondary metabolites Organismal Systems; Digestive system	Tropane, piperidine and pyridine alkaloid biosynthesis Protein digestion and absorption	4616640	4.86675e+06	4.48129e+06	5.70943e+06	6.23876e+06	4229781	5.70388e+06	3.38188e+06	4.7417e+06	4.67768e+06	6346497	3.89318e+06	5.64309e+06	7.37686e+06	4.76593e+06	5082783	3.07561e+06	4.92436e+06	4.72789e+06	6.37393e+06	5.72971e+06	6.20303e+06	4672733	6031918	6.18089e+06	10520145	6.1064e+06	3.50453e+06	6293889	3.82089e+06	4.44118e+06	6.36659e+06	4.03072e+06	4.00919e+06	8483165	4.23595e+06	5.66056e+06	5.64048e+06	4279733	5.22728e+06	3602456	6.08869e+06	3.36888e+06	3.51245e+06
15633554	236	PC(20:3(8Z,11Z,14Z)/18:1(9Z))	C46H84NO8P	None	None	6.66995e+06	6020068	6402189	6536214	8123760	6.12963e+06	6271562	7344051	6.4692e+06	6.69094e+06	6.13896e+06	5997221	6913748	10367828	8943781	6.34165e+06	6.60225e+06	6.64659e+06	4654699	4.71551e+06	4.54977e+06	6181010	5.45395e+06	8.12217e+06	6.23535e+06	6781331	5.81748e+06	5064189	4.86186e+06	6550013	6.13537e+06	8.15965e+06	5.21768e+06	7492813	7500516	6.34269e+06	8772139	7.64001e+06	5663613	7.58789e+06	7.57121e+06	7406960	6749213	8849529
15633555	236	PC(20:3(8Z,11Z,14Z)/18:1(11Z))	C46H84NO8P	None	None	6.66995e+06	6020068	6402189	6536214	8123760	6.12963e+06	6271562	7344051	6.4692e+06	6.69094e+06	6.13896e+06	5997221	6913748	10367828	8943781	6.34165e+06	6.60225e+06	6.64659e+06	4654699	4.71551e+06	4.54977e+06	6181010	5.45395e+06	8.12217e+06	6.23535e+06	6781331	5.81748e+06	5064189	4.86186e+06	6550013	6.13537e+06	8.15965e+06	5.21768e+06	7492813	7500516	6.34269e+06	8772139	7.64001e+06	5663613	7.58789e+06	7.57121e+06	7406960	6749213	8849529
15633556	236	PC(20:2(11Z,14Z)/18:2(9Z,12Z))	C46H84NO8P	None	None	6.66995e+06	6020068	6402189	6536214	8123760	6.12963e+06	6271562	7344051	6.4692e+06	6.69094e+06	6.13896e+06	5997221	6913748	10367828	8943781	6.34165e+06	6.60225e+06	6.64659e+06	4654699	4.71551e+06	4.54977e+06	6181010	5.45395e+06	8.12217e+06	6.23535e+06	6781331	5.81748e+06	5064189	4.86186e+06	6550013	6.13537e+06	8.15965e+06	5.21768e+06	7492813	7500516	6.34269e+06	8772139	7.64001e+06	5663613	7.58789e+06	7.57121e+06	7406960	6749213	8849529
15633557	236	PC(20:1(11Z)/18:3(9Z,12Z,15Z))	C46H84NO8P	None	None	6.66995e+06	6020068	6402189	6536214	8123760	6.12963e+06	6271562	7344051	6.4692e+06	6.69094e+06	6.13896e+06	5997221	6913748	10367828	8943781	6.34165e+06	6.60225e+06	6.64659e+06	4654699	4.71551e+06	4.54977e+06	6181010	5.45395e+06	8.12217e+06	6.23535e+06	6781331	5.81748e+06	5064189	4.86186e+06	6550013	6.13537e+06	8.15965e+06	5.21768e+06	7492813	7500516	6.34269e+06	8772139	7.64001e+06	5663613	7.58789e+06	7.57121e+06	7406960	6749213	8849529
15633558	236	PC(20:1(11Z)/18:3(6Z,9Z,12Z))	C46H84NO8P	None	None	6.66995e+06	6020068	6402189	6536214	8123760	6.12963e+06	6271562	7344051	6.4692e+06	6.69094e+06	6.13896e+06	5997221	6913748	10367828	8943781	6.34165e+06	6.60225e+06	6.64659e+06	4654699	4.71551e+06	4.54977e+06	6181010	5.45395e+06	8.12217e+06	6.23535e+06	6781331	5.81748e+06	5064189	4.86186e+06	6550013	6.13537e+06	8.15965e+06	5.21768e+06	7492813	7500516	6.34269e+06	8772139	7.64001e+06	5663613	7.58789e+06	7.57121e+06	7406960	6749213	8849529
15633559	236	PC(20:3(5Z,8Z,11Z)/18:1(9Z))	C46H84NO8P	None	None	6.66995e+06	6020068	6402189	6536214	8123760	6.12963e+06	6271562	7344051	6.4692e+06	6.69094e+06	6.13896e+06	5997221	6913748	10367828	8943781	6.34165e+06	6.60225e+06	6.64659e+06	4654699	4.71551e+06	4.54977e+06	6181010	5.45395e+06	8.12217e+06	6.23535e+06	6781331	5.81748e+06	5064189	4.86186e+06	6550013	6.13537e+06	8.15965e+06	5.21768e+06	7492813	7500516	6.34269e+06	8772139	7.64001e+06	5663613	7.58789e+06	7.57121e+06	7406960	6749213	8849529
15633560	236	PC(20:3(5Z,8Z,11Z)/18:1(11Z))	C46H84NO8P	None	None	6.66995e+06	6020068	6402189	6536214	8123760	6.12963e+06	6271562	7344051	6.4692e+06	6.69094e+06	6.13896e+06	5997221	6913748	10367828	8943781	6.34165e+06	6.60225e+06	6.64659e+06	4654699	4.71551e+06	4.54977e+06	6181010	5.45395e+06	8.12217e+06	6.23535e+06	6781331	5.81748e+06	5064189	4.86186e+06	6550013	6.13537e+06	8.15965e+06	5.21768e+06	7492813	7500516	6.34269e+06	8772139	7.64001e+06	5663613	7.58789e+06	7.57121e+06	7406960	6749213	8849529
15633562	236	PC(20:4(5Z,8Z,11Z,14Z)/18:0)	C46H84NO8P	None	None	6.66995e+06	6020068	6402189	6536214	8123760	6.12963e+06	6271562	7344051	6.4692e+06	6.69094e+06	6.13896e+06	5997221	6913748	10367828	8943781	6.34165e+06	6.60225e+06	6.64659e+06	4654699	4.71551e+06	4.54977e+06	6181010	5.45395e+06	8.12217e+06	6.23535e+06	6781331	5.81748e+06	5064189	4.86186e+06	6550013	6.13537e+06	8.15965e+06	5.21768e+06	7492813	7500516	6.34269e+06	8772139	7.64001e+06	5663613	7.58789e+06	7.57121e+06	7406960	6749213	8849529
15633563	236	PC(20:4(8Z,11Z,14Z,17Z)/18:0)	C46H84NO8P	None	None	6.66995e+06	6020068	6402189	6536214	8123760	6.12963e+06	6271562	7344051	6.4692e+06	6.69094e+06	6.13896e+06	5997221	6913748	10367828	8943781	6.34165e+06	6.60225e+06	6.64659e+06	4654699	4.71551e+06	4.54977e+06	6181010	5.45395e+06	8.12217e+06	6.23535e+06	6781331	5.81748e+06	5064189	4.86186e+06	6550013	6.13537e+06	8.15965e+06	5.21768e+06	7492813	7500516	6.34269e+06	8772139	7.64001e+06	5663613	7.58789e+06	7.57121e+06	7406960	6749213	8849529
15633564	236	PC(22:4(7Z,10Z,13Z,16Z)/16:0)	C46H84NO8P	None	None	6.66995e+06	6020068	6402189	6536214	8123760	6.12963e+06	6271562	7344051	6.4692e+06	6.69094e+06	6.13896e+06	5997221	6913748	10367828	8943781	6.34165e+06	6.60225e+06	6.64659e+06	4654699	4.71551e+06	4.54977e+06	6181010	5.45395e+06	8.12217e+06	6.23535e+06	6781331	5.81748e+06	5064189	4.86186e+06	6550013	6.13537e+06	8.15965e+06	5.21768e+06	7492813	7500516	6.34269e+06	8772139	7.64001e+06	5663613	7.58789e+06	7.57121e+06	7406960	6749213	8849529
15633567	236	PC(18:0/20:4(8Z,11Z,14Z,17Z))	C46H84NO8P	None	None	6.66995e+06	6020068	6402189	6536214	8123760	6.12963e+06	6271562	7344051	6.4692e+06	6.69094e+06	6.13896e+06	5997221	6913748	10367828	8943781	6.34165e+06	6.60225e+06	6.64659e+06	4654699	4.71551e+06	4.54977e+06	6181010	5.45395e+06	8.12217e+06	6.23535e+06	6781331	5.81748e+06	5064189	4.86186e+06	6550013	6.13537e+06	8.15965e+06	5.21768e+06	7492813	7500516	6.34269e+06	8772139	7.64001e+06	5663613	7.58789e+06	7.57121e+06	7406960	6749213	8849529
15633568	236	PC(18:0/20:4(5Z,8Z,11Z,14Z))	C46H84NO8P	None	None	6.66995e+06	6020068	6402189	6536214	8123760	6.12963e+06	6271562	7344051	6.4692e+06	6.69094e+06	6.13896e+06	5997221	6913748	10367828	8943781	6.34165e+06	6.60225e+06	6.64659e+06	4654699	4.71551e+06	4.54977e+06	6181010	5.45395e+06	8.12217e+06	6.23535e+06	6781331	5.81748e+06	5064189	4.86186e+06	6550013	6.13537e+06	8.15965e+06	5.21768e+06	7492813	7500516	6.34269e+06	8772139	7.64001e+06	5663613	7.58789e+06	7.57121e+06	7406960	6749213	8849529
15633571	236	PC(18:1(11Z)/20:3(8Z,11Z,14Z))	C46H84NO8P	None	None	6.66995e+06	6020068	6402189	6536214	8123760	6.12963e+06	6271562	7344051	6.4692e+06	6.69094e+06	6.13896e+06	5997221	6913748	10367828	8943781	6.34165e+06	6.60225e+06	6.64659e+06	4654699	4.71551e+06	4.54977e+06	6181010	5.45395e+06	8.12217e+06	6.23535e+06	6781331	5.81748e+06	5064189	4.86186e+06	6550013	6.13537e+06	8.15965e+06	5.21768e+06	7492813	7500516	6.34269e+06	8772139	7.64001e+06	5663613	7.58789e+06	7.57121e+06	7406960	6749213	8849529
15633572	236	PC(18:1(11Z)/20:3(5Z,8Z,11Z))	C46H84NO8P	None	None	6.66995e+06	6020068	6402189	6536214	8123760	6.12963e+06	6271562	7344051	6.4692e+06	6.69094e+06	6.13896e+06	5997221	6913748	10367828	8943781	6.34165e+06	6.60225e+06	6.64659e+06	4654699	4.71551e+06	4.54977e+06	6181010	5.45395e+06	8.12217e+06	6.23535e+06	6781331	5.81748e+06	5064189	4.86186e+06	6550013	6.13537e+06	8.15965e+06	5.21768e+06	7492813	7500516	6.34269e+06	8772139	7.64001e+06	5663613	7.58789e+06	7.57121e+06	7406960	6749213	8849529
15633574	236	PC(18:1(9Z)/20:3(8Z,11Z,14Z))	C46H84NO8P	None	None	6.66995e+06	6020068	6402189	6536214	8123760	6.12963e+06	6271562	7344051	6.4692e+06	6.69094e+06	6.13896e+06	5997221	6913748	10367828	8943781	6.34165e+06	6.60225e+06	6.64659e+06	4654699	4.71551e+06	4.54977e+06	6181010	5.45395e+06	8.12217e+06	6.23535e+06	6781331	5.81748e+06	5064189	4.86186e+06	6550013	6.13537e+06	8.15965e+06	5.21768e+06	7492813	7500516	6.34269e+06	8772139	7.64001e+06	5663613	7.58789e+06	7.57121e+06	7406960	6749213	8849529
15633575	236	PC(18:1(9Z)/20:3(5Z,8Z,11Z))	C46H84NO8P	None	None	6.66995e+06	6020068	6402189	6536214	8123760	6.12963e+06	6271562	7344051	6.4692e+06	6.69094e+06	6.13896e+06	5997221	6913748	10367828	8943781	6.34165e+06	6.60225e+06	6.64659e+06	4654699	4.71551e+06	4.54977e+06	6181010	5.45395e+06	8.12217e+06	6.23535e+06	6781331	5.81748e+06	5064189	4.86186e+06	6550013	6.13537e+06	8.15965e+06	5.21768e+06	7492813	7500516	6.34269e+06	8772139	7.64001e+06	5663613	7.58789e+06	7.57121e+06	7406960	6749213	8849529
15633577	236	PC(18:3(6Z,9Z,12Z)/20:1(11Z))	C46H84NO8P	None	None	6.66995e+06	6020068	6402189	6536214	8123760	6.12963e+06	6271562	7344051	6.4692e+06	6.69094e+06	6.13896e+06	5997221	6913748	10367828	8943781	6.34165e+06	6.60225e+06	6.64659e+06	4654699	4.71551e+06	4.54977e+06	6181010	5.45395e+06	8.12217e+06	6.23535e+06	6781331	5.81748e+06	5064189	4.86186e+06	6550013	6.13537e+06	8.15965e+06	5.21768e+06	7492813	7500516	6.34269e+06	8772139	7.64001e+06	5663613	7.58789e+06	7.57121e+06	7406960	6749213	8849529
15633578	236	PC(18:2(9Z,12Z)/20:2(11Z,14Z))	C46H84NO8P	None	None	6.66995e+06	6020068	6402189	6536214	8123760	6.12963e+06	6271562	7344051	6.4692e+06	6.69094e+06	6.13896e+06	5997221	6913748	10367828	8943781	6.34165e+06	6.60225e+06	6.64659e+06	4654699	4.71551e+06	4.54977e+06	6181010	5.45395e+06	8.12217e+06	6.23535e+06	6781331	5.81748e+06	5064189	4.86186e+06	6550013	6.13537e+06	8.15965e+06	5.21768e+06	7492813	7500516	6.34269e+06	8772139	7.64001e+06	5663613	7.58789e+06	7.57121e+06	7406960	6749213	8849529
15633579	236	PC(18:3(9Z,12Z,15Z)/20:1(11Z))	C46H84NO8P	None	None	6.66995e+06	6020068	6402189	6536214	8123760	6.12963e+06	6271562	7344051	6.4692e+06	6.69094e+06	6.13896e+06	5997221	6913748	10367828	8943781	6.34165e+06	6.60225e+06	6.64659e+06	4654699	4.71551e+06	4.54977e+06	6181010	5.45395e+06	8.12217e+06	6.23535e+06	6781331	5.81748e+06	5064189	4.86186e+06	6550013	6.13537e+06	8.15965e+06	5.21768e+06	7492813	7500516	6.34269e+06	8772139	7.64001e+06	5663613	7.58789e+06	7.57121e+06	7406960	6749213	8849529
15633580	236	PC(18:4(6Z,9Z,12Z,15Z)/20:0)	C46H84NO8P	None	None	6.66995e+06	6020068	6402189	6536214	8123760	6.12963e+06	6271562	7344051	6.4692e+06	6.69094e+06	6.13896e+06	5997221	6913748	10367828	8943781	6.34165e+06	6.60225e+06	6.64659e+06	4654699	4.71551e+06	4.54977e+06	6181010	5.45395e+06	8.12217e+06	6.23535e+06	6781331	5.81748e+06	5064189	4.86186e+06	6550013	6.13537e+06	8.15965e+06	5.21768e+06	7492813	7500516	6.34269e+06	8772139	7.64001e+06	5663613	7.58789e+06	7.57121e+06	7406960	6749213	8849529
15633582	236	PC(20:0/18:4(6Z,9Z,12Z,15Z))	C46H84NO8P	None	None	6.66995e+06	6020068	6402189	6536214	8123760	6.12963e+06	6271562	7344051	6.4692e+06	6.69094e+06	6.13896e+06	5997221	6913748	10367828	8943781	6.34165e+06	6.60225e+06	6.64659e+06	4654699	4.71551e+06	4.54977e+06	6181010	5.45395e+06	8.12217e+06	6.23535e+06	6781331	5.81748e+06	5064189	4.86186e+06	6550013	6.13537e+06	8.15965e+06	5.21768e+06	7492813	7500516	6.34269e+06	8772139	7.64001e+06	5663613	7.58789e+06	7.57121e+06	7406960	6749213	8849529
15633585	236	PC(16:0/22:4(7Z,10Z,13Z,16Z))	C46H84NO8P	None	None	6.66995e+06	6020068	6402189	6536214	8123760	6.12963e+06	6271562	7344051	6.4692e+06	6.69094e+06	6.13896e+06	5997221	6913748	10367828	8943781	6.34165e+06	6.60225e+06	6.64659e+06	4654699	4.71551e+06	4.54977e+06	6181010	5.45395e+06	8.12217e+06	6.23535e+06	6781331	5.81748e+06	5064189	4.86186e+06	6550013	6.13537e+06	8.15965e+06	5.21768e+06	7492813	7500516	6.34269e+06	8772139	7.64001e+06	5663613	7.58789e+06	7.57121e+06	7406960	6749213	8849529
15633599	236	PE(22:4(7Z,10Z,13Z,16Z)/19:0)	C46H84NO8P	None	None	6.66995e+06	6020068	6402189	6536214	8123760	6.12963e+06	6271562	7344051	6.4692e+06	6.69094e+06	6.13896e+06	5997221	6913748	10367828	8943781	6.34165e+06	6.60225e+06	6.64659e+06	4654699	4.71551e+06	4.54977e+06	6181010	5.45395e+06	8.12217e+06	6.23535e+06	6781331	5.81748e+06	5064189	4.86186e+06	6550013	6.13537e+06	8.15965e+06	5.21768e+06	7492813	7500516	6.34269e+06	8772139	7.64001e+06	5663613	7.58789e+06	7.57121e+06	7406960	6749213	8849529
15633601	236	PE(21:0/20:4(5Z,8Z,11Z,14Z))	C46H84NO8P	None	None	6.66995e+06	6020068	6402189	6536214	8123760	6.12963e+06	6271562	7344051	6.4692e+06	6.69094e+06	6.13896e+06	5997221	6913748	10367828	8943781	6.34165e+06	6.60225e+06	6.64659e+06	4654699	4.71551e+06	4.54977e+06	6181010	5.45395e+06	8.12217e+06	6.23535e+06	6781331	5.81748e+06	5064189	4.86186e+06	6550013	6.13537e+06	8.15965e+06	5.21768e+06	7492813	7500516	6.34269e+06	8772139	7.64001e+06	5663613	7.58789e+06	7.57121e+06	7406960	6749213	8849529
15633603	236	PC(18:0/20:4(8Z,10Z,12Z,14Z))	C46H84NO8P	None	None	6.66995e+06	6020068	6402189	6536214	8123760	6.12963e+06	6271562	7344051	6.4692e+06	6.69094e+06	6.13896e+06	5997221	6913748	10367828	8943781	6.34165e+06	6.60225e+06	6.64659e+06	4654699	4.71551e+06	4.54977e+06	6181010	5.45395e+06	8.12217e+06	6.23535e+06	6781331	5.81748e+06	5064189	4.86186e+06	6550013	6.13537e+06	8.15965e+06	5.21768e+06	7492813	7500516	6.34269e+06	8772139	7.64001e+06	5663613	7.58789e+06	7.57121e+06	7406960	6749213	8849529
15633616	236	PE(19:0/22:4(7Z,10Z,13Z,16Z))	C46H84NO8P	None	None	6.66995e+06	6020068	6402189	6536214	8123760	6.12963e+06	6271562	7344051	6.4692e+06	6.69094e+06	6.13896e+06	5997221	6913748	10367828	8943781	6.34165e+06	6.60225e+06	6.64659e+06	4654699	4.71551e+06	4.54977e+06	6181010	5.45395e+06	8.12217e+06	6.23535e+06	6781331	5.81748e+06	5064189	4.86186e+06	6550013	6.13537e+06	8.15965e+06	5.21768e+06	7492813	7500516	6.34269e+06	8772139	7.64001e+06	5663613	7.58789e+06	7.57121e+06	7406960	6749213	8849529
15633626	236	PE(20:4(5Z,8Z,11Z,14Z)/21:0)	C46H84NO8P	None	None	6.66995e+06	6020068	6402189	6536214	8123760	6.12963e+06	6271562	7344051	6.4692e+06	6.69094e+06	6.13896e+06	5997221	6913748	10367828	8943781	6.34165e+06	6.60225e+06	6.64659e+06	4654699	4.71551e+06	4.54977e+06	6181010	5.45395e+06	8.12217e+06	6.23535e+06	6781331	5.81748e+06	5064189	4.86186e+06	6550013	6.13537e+06	8.15965e+06	5.21768e+06	7492813	7500516	6.34269e+06	8772139	7.64001e+06	5663613	7.58789e+06	7.57121e+06	7406960	6749213	8849529
15633628	237	PC(20:3(8Z,11Z,14Z)/20:2(11Z,14Z))	C48H86NO8P	None	None	1.9893e+06	1.6209e+06	1844312	1.66681e+06	2.50135e+06	1.89014e+06	1.84405e+06	2.22558e+06	1.86723e+06	1.71765e+06	1.6185e+06	1.7423e+06	1.59242e+06	2.86588e+06	3736708	1.76565e+06	2.0278e+06	1.75398e+06	1211535	1.36917e+06	1.24127e+06	1441528	1.84758e+06	2.13219e+06	2067521	2.29329e+06	1.64456e+06	1.53785e+06	1.25086e+06	2251417	1.39447e+06	2.47566e+06	1.4945e+06	2.18379e+06	2.67716e+06	1.86082e+06	2.8606e+06	2.0585e+06	1.89238e+06	1.78565e+06	1.89807e+06	1.78246e+06	1.93308e+06	2378361
15633630	237	PC(20:1(11Z)/20:4(8Z,11Z,14Z,17Z))	C48H86NO8P	None	None	1.9893e+06	1.6209e+06	1844312	1.66681e+06	2.50135e+06	1.89014e+06	1.84405e+06	2.22558e+06	1.86723e+06	1.71765e+06	1.6185e+06	1.7423e+06	1.59242e+06	2.86588e+06	3736708	1.76565e+06	2.0278e+06	1.75398e+06	1211535	1.36917e+06	1.24127e+06	1441528	1.84758e+06	2.13219e+06	2067521	2.29329e+06	1.64456e+06	1.53785e+06	1.25086e+06	2251417	1.39447e+06	2.47566e+06	1.4945e+06	2.18379e+06	2.67716e+06	1.86082e+06	2.8606e+06	2.0585e+06	1.89238e+06	1.78565e+06	1.89807e+06	1.78246e+06	1.93308e+06	2378361
15633631	237	PC(20:1(11Z)/20:4(5Z,8Z,11Z,14Z))	C48H86NO8P	None	None	1.9893e+06	1.6209e+06	1844312	1.66681e+06	2.50135e+06	1.89014e+06	1.84405e+06	2.22558e+06	1.86723e+06	1.71765e+06	1.6185e+06	1.7423e+06	1.59242e+06	2.86588e+06	3736708	1.76565e+06	2.0278e+06	1.75398e+06	1211535	1.36917e+06	1.24127e+06	1441528	1.84758e+06	2.13219e+06	2067521	2.29329e+06	1.64456e+06	1.53785e+06	1.25086e+06	2251417	1.39447e+06	2.47566e+06	1.4945e+06	2.18379e+06	2.67716e+06	1.86082e+06	2.8606e+06	2.0585e+06	1.89238e+06	1.78565e+06	1.89807e+06	1.78246e+06	1.93308e+06	2378361
15633634	237	PC(20:3(5Z,8Z,11Z)/20:2(11Z,14Z))	C48H86NO8P	None	None	1.9893e+06	1.6209e+06	1844312	1.66681e+06	2.50135e+06	1.89014e+06	1.84405e+06	2.22558e+06	1.86723e+06	1.71765e+06	1.6185e+06	1.7423e+06	1.59242e+06	2.86588e+06	3736708	1.76565e+06	2.0278e+06	1.75398e+06	1211535	1.36917e+06	1.24127e+06	1441528	1.84758e+06	2.13219e+06	2067521	2.29329e+06	1.64456e+06	1.53785e+06	1.25086e+06	2251417	1.39447e+06	2.47566e+06	1.4945e+06	2.18379e+06	2.67716e+06	1.86082e+06	2.8606e+06	2.0585e+06	1.89238e+06	1.78565e+06	1.89807e+06	1.78246e+06	1.93308e+06	2378361
15633635	237	PC(20:2(11Z,14Z)/20:3(8Z,11Z,14Z))	C48H86NO8P	None	None	1.9893e+06	1.6209e+06	1844312	1.66681e+06	2.50135e+06	1.89014e+06	1.84405e+06	2.22558e+06	1.86723e+06	1.71765e+06	1.6185e+06	1.7423e+06	1.59242e+06	2.86588e+06	3736708	1.76565e+06	2.0278e+06	1.75398e+06	1211535	1.36917e+06	1.24127e+06	1441528	1.84758e+06	2.13219e+06	2067521	2.29329e+06	1.64456e+06	1.53785e+06	1.25086e+06	2251417	1.39447e+06	2.47566e+06	1.4945e+06	2.18379e+06	2.67716e+06	1.86082e+06	2.8606e+06	2.0585e+06	1.89238e+06	1.78565e+06	1.89807e+06	1.78246e+06	1.93308e+06	2378361
15633636	237	PC(20:2(11Z,14Z)/20:3(5Z,8Z,11Z))	C48H86NO8P	None	None	1.9893e+06	1.6209e+06	1844312	1.66681e+06	2.50135e+06	1.89014e+06	1.84405e+06	2.22558e+06	1.86723e+06	1.71765e+06	1.6185e+06	1.7423e+06	1.59242e+06	2.86588e+06	3736708	1.76565e+06	2.0278e+06	1.75398e+06	1211535	1.36917e+06	1.24127e+06	1441528	1.84758e+06	2.13219e+06	2067521	2.29329e+06	1.64456e+06	1.53785e+06	1.25086e+06	2251417	1.39447e+06	2.47566e+06	1.4945e+06	2.18379e+06	2.67716e+06	1.86082e+06	2.8606e+06	2.0585e+06	1.89238e+06	1.78565e+06	1.89807e+06	1.78246e+06	1.93308e+06	2378361
15633637	237	PC(20:5(5Z,8Z,11Z,14Z,17Z)/20:0)	C48H86NO8P	None	None	1.9893e+06	1.6209e+06	1844312	1.66681e+06	2.50135e+06	1.89014e+06	1.84405e+06	2.22558e+06	1.86723e+06	1.71765e+06	1.6185e+06	1.7423e+06	1.59242e+06	2.86588e+06	3736708	1.76565e+06	2.0278e+06	1.75398e+06	1211535	1.36917e+06	1.24127e+06	1441528	1.84758e+06	2.13219e+06	2067521	2.29329e+06	1.64456e+06	1.53785e+06	1.25086e+06	2251417	1.39447e+06	2.47566e+06	1.4945e+06	2.18379e+06	2.67716e+06	1.86082e+06	2.8606e+06	2.0585e+06	1.89238e+06	1.78565e+06	1.89807e+06	1.78246e+06	1.93308e+06	2378361
15633638	237	PC(20:4(5Z,8Z,11Z,14Z)/20:1(11Z))	C48H86NO8P	None	None	1.9893e+06	1.6209e+06	1844312	1.66681e+06	2.50135e+06	1.89014e+06	1.84405e+06	2.22558e+06	1.86723e+06	1.71765e+06	1.6185e+06	1.7423e+06	1.59242e+06	2.86588e+06	3736708	1.76565e+06	2.0278e+06	1.75398e+06	1211535	1.36917e+06	1.24127e+06	1441528	1.84758e+06	2.13219e+06	2067521	2.29329e+06	1.64456e+06	1.53785e+06	1.25086e+06	2251417	1.39447e+06	2.47566e+06	1.4945e+06	2.18379e+06	2.67716e+06	1.86082e+06	2.8606e+06	2.0585e+06	1.89238e+06	1.78565e+06	1.89807e+06	1.78246e+06	1.93308e+06	2378361
15633639	237	PC(20:4(8Z,11Z,14Z,17Z)/20:1(11Z))	C48H86NO8P	None	None	1.9893e+06	1.6209e+06	1844312	1.66681e+06	2.50135e+06	1.89014e+06	1.84405e+06	2.22558e+06	1.86723e+06	1.71765e+06	1.6185e+06	1.7423e+06	1.59242e+06	2.86588e+06	3736708	1.76565e+06	2.0278e+06	1.75398e+06	1211535	1.36917e+06	1.24127e+06	1441528	1.84758e+06	2.13219e+06	2067521	2.29329e+06	1.64456e+06	1.53785e+06	1.25086e+06	2251417	1.39447e+06	2.47566e+06	1.4945e+06	2.18379e+06	2.67716e+06	1.86082e+06	2.8606e+06	2.0585e+06	1.89238e+06	1.78565e+06	1.89807e+06	1.78246e+06	1.93308e+06	2378361
15633640	237	PC(22:2(13Z,16Z)/18:3(9Z,12Z,15Z))	C48H86NO8P	None	None	1.9893e+06	1.6209e+06	1844312	1.66681e+06	2.50135e+06	1.89014e+06	1.84405e+06	2.22558e+06	1.86723e+06	1.71765e+06	1.6185e+06	1.7423e+06	1.59242e+06	2.86588e+06	3736708	1.76565e+06	2.0278e+06	1.75398e+06	1211535	1.36917e+06	1.24127e+06	1441528	1.84758e+06	2.13219e+06	2067521	2.29329e+06	1.64456e+06	1.53785e+06	1.25086e+06	2251417	1.39447e+06	2.47566e+06	1.4945e+06	2.18379e+06	2.67716e+06	1.86082e+06	2.8606e+06	2.0585e+06	1.89238e+06	1.78565e+06	1.89807e+06	1.78246e+06	1.93308e+06	2378361
15633641	237	PC(22:4(7Z,10Z,13Z,16Z)/18:1(9Z))	C48H86NO8P	None	None	1.9893e+06	1.6209e+06	1844312	1.66681e+06	2.50135e+06	1.89014e+06	1.84405e+06	2.22558e+06	1.86723e+06	1.71765e+06	1.6185e+06	1.7423e+06	1.59242e+06	2.86588e+06	3736708	1.76565e+06	2.0278e+06	1.75398e+06	1211535	1.36917e+06	1.24127e+06	1441528	1.84758e+06	2.13219e+06	2067521	2.29329e+06	1.64456e+06	1.53785e+06	1.25086e+06	2251417	1.39447e+06	2.47566e+06	1.4945e+06	2.18379e+06	2.67716e+06	1.86082e+06	2.8606e+06	2.0585e+06	1.89238e+06	1.78565e+06	1.89807e+06	1.78246e+06	1.93308e+06	2378361
15633642	237	PC(22:4(7Z,10Z,13Z,16Z)/18:1(11Z))	C48H86NO8P	None	None	1.9893e+06	1.6209e+06	1844312	1.66681e+06	2.50135e+06	1.89014e+06	1.84405e+06	2.22558e+06	1.86723e+06	1.71765e+06	1.6185e+06	1.7423e+06	1.59242e+06	2.86588e+06	3736708	1.76565e+06	2.0278e+06	1.75398e+06	1211535	1.36917e+06	1.24127e+06	1441528	1.84758e+06	2.13219e+06	2067521	2.29329e+06	1.64456e+06	1.53785e+06	1.25086e+06	2251417	1.39447e+06	2.47566e+06	1.4945e+06	2.18379e+06	2.67716e+06	1.86082e+06	2.8606e+06	2.0585e+06	1.89238e+06	1.78565e+06	1.89807e+06	1.78246e+06	1.93308e+06	2378361
15633643	237	PC(22:1(13Z)/18:4(6Z,9Z,12Z,15Z))	C48H86NO8P	None	None	1.9893e+06	1.6209e+06	1844312	1.66681e+06	2.50135e+06	1.89014e+06	1.84405e+06	2.22558e+06	1.86723e+06	1.71765e+06	1.6185e+06	1.7423e+06	1.59242e+06	2.86588e+06	3736708	1.76565e+06	2.0278e+06	1.75398e+06	1211535	1.36917e+06	1.24127e+06	1441528	1.84758e+06	2.13219e+06	2067521	2.29329e+06	1.64456e+06	1.53785e+06	1.25086e+06	2251417	1.39447e+06	2.47566e+06	1.4945e+06	2.18379e+06	2.67716e+06	1.86082e+06	2.8606e+06	2.0585e+06	1.89238e+06	1.78565e+06	1.89807e+06	1.78246e+06	1.93308e+06	2378361
15633645	237	PC(22:2(13Z,16Z)/18:3(6Z,9Z,12Z))	C48H86NO8P	None	None	1.9893e+06	1.6209e+06	1844312	1.66681e+06	2.50135e+06	1.89014e+06	1.84405e+06	2.22558e+06	1.86723e+06	1.71765e+06	1.6185e+06	1.7423e+06	1.59242e+06	2.86588e+06	3736708	1.76565e+06	2.0278e+06	1.75398e+06	1211535	1.36917e+06	1.24127e+06	1441528	1.84758e+06	2.13219e+06	2067521	2.29329e+06	1.64456e+06	1.53785e+06	1.25086e+06	2251417	1.39447e+06	2.47566e+06	1.4945e+06	2.18379e+06	2.67716e+06	1.86082e+06	2.8606e+06	2.0585e+06	1.89238e+06	1.78565e+06	1.89807e+06	1.78246e+06	1.93308e+06	2378361
15633647	237	PC(22:5(7Z,10Z,13Z,16Z,19Z)/18:0)	C48H86NO8P	None	None	1.9893e+06	1.6209e+06	1844312	1.66681e+06	2.50135e+06	1.89014e+06	1.84405e+06	2.22558e+06	1.86723e+06	1.71765e+06	1.6185e+06	1.7423e+06	1.59242e+06	2.86588e+06	3736708	1.76565e+06	2.0278e+06	1.75398e+06	1211535	1.36917e+06	1.24127e+06	1441528	1.84758e+06	2.13219e+06	2067521	2.29329e+06	1.64456e+06	1.53785e+06	1.25086e+06	2251417	1.39447e+06	2.47566e+06	1.4945e+06	2.18379e+06	2.67716e+06	1.86082e+06	2.8606e+06	2.0585e+06	1.89238e+06	1.78565e+06	1.89807e+06	1.78246e+06	1.93308e+06	2378361
15633648	237	PC(22:5(4Z,7Z,10Z,13Z,16Z)/18:0)	C48H86NO8P	None	None	1.9893e+06	1.6209e+06	1844312	1.66681e+06	2.50135e+06	1.89014e+06	1.84405e+06	2.22558e+06	1.86723e+06	1.71765e+06	1.6185e+06	1.7423e+06	1.59242e+06	2.86588e+06	3736708	1.76565e+06	2.0278e+06	1.75398e+06	1211535	1.36917e+06	1.24127e+06	1441528	1.84758e+06	2.13219e+06	2067521	2.29329e+06	1.64456e+06	1.53785e+06	1.25086e+06	2251417	1.39447e+06	2.47566e+06	1.4945e+06	2.18379e+06	2.67716e+06	1.86082e+06	2.8606e+06	2.0585e+06	1.89238e+06	1.78565e+06	1.89807e+06	1.78246e+06	1.93308e+06	2378361
15633650	237	PC(18:0/22:5(7Z,10Z,13Z,16Z,19Z))	C48H86NO8P	None	None	1.9893e+06	1.6209e+06	1844312	1.66681e+06	2.50135e+06	1.89014e+06	1.84405e+06	2.22558e+06	1.86723e+06	1.71765e+06	1.6185e+06	1.7423e+06	1.59242e+06	2.86588e+06	3736708	1.76565e+06	2.0278e+06	1.75398e+06	1211535	1.36917e+06	1.24127e+06	1441528	1.84758e+06	2.13219e+06	2067521	2.29329e+06	1.64456e+06	1.53785e+06	1.25086e+06	2251417	1.39447e+06	2.47566e+06	1.4945e+06	2.18379e+06	2.67716e+06	1.86082e+06	2.8606e+06	2.0585e+06	1.89238e+06	1.78565e+06	1.89807e+06	1.78246e+06	1.93308e+06	2378361
15633651	237	PC(18:0/22:5(4Z,7Z,10Z,13Z,16Z))	C48H86NO8P	None	None	1.9893e+06	1.6209e+06	1844312	1.66681e+06	2.50135e+06	1.89014e+06	1.84405e+06	2.22558e+06	1.86723e+06	1.71765e+06	1.6185e+06	1.7423e+06	1.59242e+06	2.86588e+06	3736708	1.76565e+06	2.0278e+06	1.75398e+06	1211535	1.36917e+06	1.24127e+06	1441528	1.84758e+06	2.13219e+06	2067521	2.29329e+06	1.64456e+06	1.53785e+06	1.25086e+06	2251417	1.39447e+06	2.47566e+06	1.4945e+06	2.18379e+06	2.67716e+06	1.86082e+06	2.8606e+06	2.0585e+06	1.89238e+06	1.78565e+06	1.89807e+06	1.78246e+06	1.93308e+06	2378361
15633653	237	PC(18:1(11Z)/22:4(7Z,10Z,13Z,16Z))	C48H86NO8P	None	None	1.9893e+06	1.6209e+06	1844312	1.66681e+06	2.50135e+06	1.89014e+06	1.84405e+06	2.22558e+06	1.86723e+06	1.71765e+06	1.6185e+06	1.7423e+06	1.59242e+06	2.86588e+06	3736708	1.76565e+06	2.0278e+06	1.75398e+06	1211535	1.36917e+06	1.24127e+06	1441528	1.84758e+06	2.13219e+06	2067521	2.29329e+06	1.64456e+06	1.53785e+06	1.25086e+06	2251417	1.39447e+06	2.47566e+06	1.4945e+06	2.18379e+06	2.67716e+06	1.86082e+06	2.8606e+06	2.0585e+06	1.89238e+06	1.78565e+06	1.89807e+06	1.78246e+06	1.93308e+06	2378361
15633655	237	PC(18:1(9Z)/22:4(7Z,10Z,13Z,16Z))	C48H86NO8P	None	None	1.9893e+06	1.6209e+06	1844312	1.66681e+06	2.50135e+06	1.89014e+06	1.84405e+06	2.22558e+06	1.86723e+06	1.71765e+06	1.6185e+06	1.7423e+06	1.59242e+06	2.86588e+06	3736708	1.76565e+06	2.0278e+06	1.75398e+06	1211535	1.36917e+06	1.24127e+06	1441528	1.84758e+06	2.13219e+06	2067521	2.29329e+06	1.64456e+06	1.53785e+06	1.25086e+06	2251417	1.39447e+06	2.47566e+06	1.4945e+06	2.18379e+06	2.67716e+06	1.86082e+06	2.8606e+06	2.0585e+06	1.89238e+06	1.78565e+06	1.89807e+06	1.78246e+06	1.93308e+06	2378361
15633658	237	PC(18:3(6Z,9Z,12Z)/22:2(13Z,16Z))	C48H86NO8P	None	None	1.9893e+06	1.6209e+06	1844312	1.66681e+06	2.50135e+06	1.89014e+06	1.84405e+06	2.22558e+06	1.86723e+06	1.71765e+06	1.6185e+06	1.7423e+06	1.59242e+06	2.86588e+06	3736708	1.76565e+06	2.0278e+06	1.75398e+06	1211535	1.36917e+06	1.24127e+06	1441528	1.84758e+06	2.13219e+06	2067521	2.29329e+06	1.64456e+06	1.53785e+06	1.25086e+06	2251417	1.39447e+06	2.47566e+06	1.4945e+06	2.18379e+06	2.67716e+06	1.86082e+06	2.8606e+06	2.0585e+06	1.89238e+06	1.78565e+06	1.89807e+06	1.78246e+06	1.93308e+06	2378361
15633659	237	PC(18:3(9Z,12Z,15Z)/22:2(13Z,16Z))	C48H86NO8P	None	None	1.9893e+06	1.6209e+06	1844312	1.66681e+06	2.50135e+06	1.89014e+06	1.84405e+06	2.22558e+06	1.86723e+06	1.71765e+06	1.6185e+06	1.7423e+06	1.59242e+06	2.86588e+06	3736708	1.76565e+06	2.0278e+06	1.75398e+06	1211535	1.36917e+06	1.24127e+06	1441528	1.84758e+06	2.13219e+06	2067521	2.29329e+06	1.64456e+06	1.53785e+06	1.25086e+06	2251417	1.39447e+06	2.47566e+06	1.4945e+06	2.18379e+06	2.67716e+06	1.86082e+06	2.8606e+06	2.0585e+06	1.89238e+06	1.78565e+06	1.89807e+06	1.78246e+06	1.93308e+06	2378361
15633660	237	PC(18:4(6Z,9Z,12Z,15Z)/22:1(13Z))	C48H86NO8P	None	None	1.9893e+06	1.6209e+06	1844312	1.66681e+06	2.50135e+06	1.89014e+06	1.84405e+06	2.22558e+06	1.86723e+06	1.71765e+06	1.6185e+06	1.7423e+06	1.59242e+06	2.86588e+06	3736708	1.76565e+06	2.0278e+06	1.75398e+06	1211535	1.36917e+06	1.24127e+06	1441528	1.84758e+06	2.13219e+06	2067521	2.29329e+06	1.64456e+06	1.53785e+06	1.25086e+06	2251417	1.39447e+06	2.47566e+06	1.4945e+06	2.18379e+06	2.67716e+06	1.86082e+06	2.8606e+06	2.0585e+06	1.89238e+06	1.78565e+06	1.89807e+06	1.78246e+06	1.93308e+06	2378361
15633661	237	PC(20:0/20:5(5Z,8Z,11Z,14Z,17Z))	C48H86NO8P	None	None	1.9893e+06	1.6209e+06	1844312	1.66681e+06	2.50135e+06	1.89014e+06	1.84405e+06	2.22558e+06	1.86723e+06	1.71765e+06	1.6185e+06	1.7423e+06	1.59242e+06	2.86588e+06	3736708	1.76565e+06	2.0278e+06	1.75398e+06	1211535	1.36917e+06	1.24127e+06	1441528	1.84758e+06	2.13219e+06	2067521	2.29329e+06	1.64456e+06	1.53785e+06	1.25086e+06	2251417	1.39447e+06	2.47566e+06	1.4945e+06	2.18379e+06	2.67716e+06	1.86082e+06	2.8606e+06	2.0585e+06	1.89238e+06	1.78565e+06	1.89807e+06	1.78246e+06	1.93308e+06	2378361
15633670	237	PC(22:1(11Z)/18:4(6Z,9Z,12Z,15Z))	C48H86NO8P	None	None	1.9893e+06	1.6209e+06	1844312	1.66681e+06	2.50135e+06	1.89014e+06	1.84405e+06	2.22558e+06	1.86723e+06	1.71765e+06	1.6185e+06	1.7423e+06	1.59242e+06	2.86588e+06	3736708	1.76565e+06	2.0278e+06	1.75398e+06	1211535	1.36917e+06	1.24127e+06	1441528	1.84758e+06	2.13219e+06	2067521	2.29329e+06	1.64456e+06	1.53785e+06	1.25086e+06	2251417	1.39447e+06	2.47566e+06	1.4945e+06	2.18379e+06	2.67716e+06	1.86082e+06	2.8606e+06	2.0585e+06	1.89238e+06	1.78565e+06	1.89807e+06	1.78246e+06	1.93308e+06	2378361
15633688	237	PC(18:4(6Z,9Z,12Z,15Z)/22:1(11Z))	C48H86NO8P	None	None	1.9893e+06	1.6209e+06	1844312	1.66681e+06	2.50135e+06	1.89014e+06	1.84405e+06	2.22558e+06	1.86723e+06	1.71765e+06	1.6185e+06	1.7423e+06	1.59242e+06	2.86588e+06	3736708	1.76565e+06	2.0278e+06	1.75398e+06	1211535	1.36917e+06	1.24127e+06	1441528	1.84758e+06	2.13219e+06	2067521	2.29329e+06	1.64456e+06	1.53785e+06	1.25086e+06	2251417	1.39447e+06	2.47566e+06	1.4945e+06	2.18379e+06	2.67716e+06	1.86082e+06	2.8606e+06	2.0585e+06	1.89238e+06	1.78565e+06	1.89807e+06	1.78246e+06	1.93308e+06	2378361
15633693	238	L-Tyrosine	C9H11NO3	None	None	6.79643e+06	5.62017e+06	6.60823e+06	8809766	6634812	7.08891e+06	7.73964e+06	2997407	6.71562e+06	7.47328e+06	8222865	5764045	8532863	10207655	5.42195e+06	7.86172e+06	2.9826e+06	7.6675e+06	6633823	7753518	7627493	9023365	4.17377e+06	3.39898e+06	6893961	5.80674e+06	6763892	4578981	5949715	4.54735e+06	7114968	7258249	5760930	4.1116e+06	6.29115e+06	5.85532e+06	7809909	7972567	5048175	5689787	5.20574e+06	5.10138e+06	5687294	5030739
15633694	238	o-Tyrosine	C9H11NO3	None	None	6.79643e+06	5.62017e+06	6.60823e+06	8809766	6634812	7.08891e+06	7.73964e+06	2997407	6.71562e+06	7.47328e+06	8222865	5764045	8532863	10207655	5.42195e+06	7.86172e+06	2.9826e+06	7.6675e+06	6633823	7753518	7627493	9023365	4.17377e+06	3.39898e+06	6893961	5.80674e+06	6763892	4578981	5949715	4.54735e+06	7114968	7258249	5760930	4.1116e+06	6.29115e+06	5.85532e+06	7809909	7972567	5048175	5689787	5.20574e+06	5.10138e+06	5687294	5030739
15633695	238	Meta-Tyrosine	C9H11NO3	None	None	6.79643e+06	5.62017e+06	6.60823e+06	8809766	6634812	7.08891e+06	7.73964e+06	2997407	6.71562e+06	7.47328e+06	8222865	5764045	8532863	10207655	5.42195e+06	7.86172e+06	2.9826e+06	7.6675e+06	6633823	7753518	7627493	9023365	4.17377e+06	3.39898e+06	6893961	5.80674e+06	6763892	4578981	5949715	4.54735e+06	7114968	7258249	5760930	4.1116e+06	6.29115e+06	5.85532e+06	7809909	7972567	5048175	5689787	5.20574e+06	5.10138e+06	5687294	5030739
15633698	238	4,6,7-Trihydroxy-1,2,3,4-tetrahydroisoquinoline	C9H11NO3	None	None	6.79643e+06	5.62017e+06	6.60823e+06	8809766	6634812	7.08891e+06	7.73964e+06	2997407	6.71562e+06	7.47328e+06	8222865	5764045	8532863	10207655	5.42195e+06	7.86172e+06	2.9826e+06	7.6675e+06	6633823	7753518	7627493	9023365	4.17377e+06	3.39898e+06	6893961	5.80674e+06	6763892	4578981	5949715	4.54735e+06	7114968	7258249	5760930	4.1116e+06	6.29115e+06	5.85532e+06	7809909	7972567	5048175	5689787	5.20574e+06	5.10138e+06	5687294	5030739
15633699	238	gamma-Hydroxy-3-pyridinebutanoate	C9H11NO3	Human Diseases; Cancers Metabolism; Xenobiotics biodegradation and metabolism	Chemical carcinogenesis Metabolism of xenobiotics by cytochrome P450	6.79643e+06	5.62017e+06	6.60823e+06	8809766	6634812	7.08891e+06	7.73964e+06	2997407	6.71562e+06	7.47328e+06	8222865	5764045	8532863	10207655	5.42195e+06	7.86172e+06	2.9826e+06	7.6675e+06	6633823	7753518	7627493	9023365	4.17377e+06	3.39898e+06	6893961	5.80674e+06	6763892	4578981	5949715	4.54735e+06	7114968	7258249	5760930	4.1116e+06	6.29115e+06	5.85532e+06	7809909	7972567	5048175	5689787	5.20574e+06	5.10138e+06	5687294	5030739
15633700	238	L-Threo-3-Phenylserine	C9H11NO3	None	None	6.79643e+06	5.62017e+06	6.60823e+06	8809766	6634812	7.08891e+06	7.73964e+06	2997407	6.71562e+06	7.47328e+06	8222865	5764045	8532863	10207655	5.42195e+06	7.86172e+06	2.9826e+06	7.6675e+06	6633823	7753518	7627493	9023365	4.17377e+06	3.39898e+06	6893961	5.80674e+06	6763892	4578981	5949715	4.54735e+06	7114968	7258249	5760930	4.1116e+06	6.29115e+06	5.85532e+06	7809909	7972567	5048175	5689787	5.20574e+06	5.10138e+06	5687294	5030739
15633702	238	3-Amino-3-(4-hydroxyphenyl)propanoate	C9H11NO3	Metabolism; Amino acid metabolism	Tyrosine metabolism	6.79643e+06	5.62017e+06	6.60823e+06	8809766	6634812	7.08891e+06	7.73964e+06	2997407	6.71562e+06	7.47328e+06	8222865	5764045	8532863	10207655	5.42195e+06	7.86172e+06	2.9826e+06	7.6675e+06	6633823	7753518	7627493	9023365	4.17377e+06	3.39898e+06	6893961	5.80674e+06	6763892	4578981	5949715	4.54735e+06	7114968	7258249	5760930	4.1116e+06	6.29115e+06	5.85532e+06	7809909	7972567	5048175	5689787	5.20574e+06	5.10138e+06	5687294	5030739
15633703	238	N-Hydroxy-L-phenylalanine	C9H11NO3	Metabolism; Metabolism of other amino acids	Cyanoamino acid metabolism	6.79643e+06	5.62017e+06	6.60823e+06	8809766	6634812	7.08891e+06	7.73964e+06	2997407	6.71562e+06	7.47328e+06	8222865	5764045	8532863	10207655	5.42195e+06	7.86172e+06	2.9826e+06	7.6675e+06	6633823	7753518	7627493	9023365	4.17377e+06	3.39898e+06	6893961	5.80674e+06	6763892	4578981	5949715	4.54735e+06	7114968	7258249	5760930	4.1116e+06	6.29115e+06	5.85532e+06	7809909	7972567	5048175	5689787	5.20574e+06	5.10138e+06	5687294	5030739
15633704	238	D-Tyrosine	C9H11NO3	None	None	6.79643e+06	5.62017e+06	6.60823e+06	8809766	6634812	7.08891e+06	7.73964e+06	2997407	6.71562e+06	7.47328e+06	8222865	5764045	8532863	10207655	5.42195e+06	7.86172e+06	2.9826e+06	7.6675e+06	6633823	7753518	7627493	9023365	4.17377e+06	3.39898e+06	6893961	5.80674e+06	6763892	4578981	5949715	4.54735e+06	7114968	7258249	5760930	4.1116e+06	6.29115e+06	5.85532e+06	7809909	7972567	5048175	5689787	5.20574e+06	5.10138e+06	5687294	5030739
15633707	238	DL-Tyrosine	C9H11NO3	None	None	6.79643e+06	5.62017e+06	6.60823e+06	8809766	6634812	7.08891e+06	7.73964e+06	2997407	6.71562e+06	7.47328e+06	8222865	5764045	8532863	10207655	5.42195e+06	7.86172e+06	2.9826e+06	7.6675e+06	6633823	7753518	7627493	9023365	4.17377e+06	3.39898e+06	6893961	5.80674e+06	6763892	4578981	5949715	4.54735e+06	7114968	7258249	5760930	4.1116e+06	6.29115e+06	5.85532e+06	7809909	7972567	5048175	5689787	5.20574e+06	5.10138e+06	5687294	5030739
15633711	238	L-threo-3-Phenylserine	C9H11NO3	None	None	6.79643e+06	5.62017e+06	6.60823e+06	8809766	6634812	7.08891e+06	7.73964e+06	2997407	6.71562e+06	7.47328e+06	8222865	5764045	8532863	10207655	5.42195e+06	7.86172e+06	2.9826e+06	7.6675e+06	6633823	7753518	7627493	9023365	4.17377e+06	3.39898e+06	6893961	5.80674e+06	6763892	4578981	5949715	4.54735e+06	7114968	7258249	5760930	4.1116e+06	6.29115e+06	5.85532e+06	7809909	7972567	5048175	5689787	5.20574e+06	5.10138e+06	5687294	5030739
15633712	238	L-Tyrosine	C9H11NO3	Metabolism; Biosynthesis of other secondary metabolites Metabolism; Metabolism of terpenoids and polyketides Metabolism; Metabolism of cofactors and vitamins Metabolism; Metabolism of other amino acids Human Diseases; Substance dependence Metabolism; Metabolism of cofactors and vitamins Metabolism; Amino acid metabolism Metabolism; Amino acid metabolism Metabolism; Biosynthesis of other secondary…	Glucosinolate biosynthesis Biosynthesis of vancomycin group antibiotics Ubiquinone and other terpenoid-quinone biosynthesis Cyanoamino acid metabolism Alcoholism Thiamine metabolism Phenylalanine metabolism Phenylalanine, tyrosine and tryptophan biosynthesis Novobiocin biosynthesis Cocaine addiction Betalain biosynthesis Protein digestion and absorption Aminoacyl-tRNA biosynthesis Melanogenesis T…	6.79643e+06	5.62017e+06	6.60823e+06	8809766	6634812	7.08891e+06	7.73964e+06	2997407	6.71562e+06	7.47328e+06	8222865	5764045	8532863	10207655	5.42195e+06	7.86172e+06	2.9826e+06	7.6675e+06	6633823	7753518	7627493	9023365	4.17377e+06	3.39898e+06	6893961	5.80674e+06	6763892	4578981	5949715	4.54735e+06	7114968	7258249	5760930	4.1116e+06	6.29115e+06	5.85532e+06	7809909	7972567	5048175	5689787	5.20574e+06	5.10138e+06	5687294	5030739
15633714	241	Pyrrolidine	C4H9N	None	None	5661489	6.47203e+06	5.62065e+06	6929159	8564938	4.93291e+06	6.36959e+06	4187269	6.01554e+06	5.27648e+06	7.55692e+06	4419876	7757164	9934334	6.93937e+06	6596363	4.03423e+06	6.76787e+06	5471214	8429035	7030990	7.43744e+06	6779830	7.98549e+06	7.35913e+06	7.13939e+06	7.24926e+06	5100574	7.07185e+06	4841387	5.76396e+06	9169411	5445655	6.53083e+06	7.5103e+06	6147393	6745363	6.67584e+06	4689475	6.65058e+06	5.04499e+06	6493417	4349185	3.65208e+06
15633715	241	3-Buten-1-amine	C4H9N	None	None	5661489	6.47203e+06	5.62065e+06	6929159	8564938	4.93291e+06	6.36959e+06	4187269	6.01554e+06	5.27648e+06	7.55692e+06	4419876	7757164	9934334	6.93937e+06	6596363	4.03423e+06	6.76787e+06	5471214	8429035	7030990	7.43744e+06	6779830	7.98549e+06	7.35913e+06	7.13939e+06	7.24926e+06	5100574	7.07185e+06	4841387	5.76396e+06	9169411	5445655	6.53083e+06	7.5103e+06	6147393	6745363	6.67584e+06	4689475	6.65058e+06	5.04499e+06	6493417	4349185	3.65208e+06
15633731	245	Deoxycytosine	C4H7N3	None	None	4.51967e+06	1.07473e+06	2966156	3.4222e+06	4.10401e+06	5381107	3.09579e+06	1.57818e+06	3.259e+06	2.01818e+06	3.96356e+06	2.04221e+06	4392740	1.85021e+06	4556441	1.62431e+06	1.4598e+06	2.0302e+06	2982657	1.89007e+06	1.66089e+06	5.18212e+06	2.20011e+06	1.37243e+06	6.58442e+06	1.53824e+06	2.04509e+06	1.43164e+06	2.94181e+06	2.90879e+06	3.23173e+06	6.3476e+06	3800756	1.35934e+06	3212452	3.07713e+06	7.02241e+06	1.25461e+06	1.67781e+06	1.76004e+06	3.00592e+06	1.90371e+06	6302725	2.29909e+06
15633732	246	Gyromitrin	C4H8N2O	None	None	1.65262e+06	487416	830443	1.39596e+06	2385847	2.12343e+06	1716893	666715	1.52429e+06	1.00294e+06	556028	876542	1.83438e+06	831846	1.38615e+06	722339	477803	854194	2.09152e+06	738599	794146	2488358	655423	581463	1.10877e+06	639387	766372	740336	609593	1.16823e+06	1.74091e+06	1.8766e+06	1.42111e+06	612477	1813211	1.29467e+06	3343403	478798	785022	805863	1.60902e+06	650783	2454091	1.08087e+06
15633735	246	N-Nitrosopyrrolidine	C4H8N2O	None	None	1.65262e+06	487416	830443	1.39596e+06	2385847	2.12343e+06	1716893	666715	1.52429e+06	1.00294e+06	556028	876542	1.83438e+06	831846	1.38615e+06	722339	477803	854194	2.09152e+06	738599	794146	2488358	655423	581463	1.10877e+06	639387	766372	740336	609593	1.16823e+06	1.74091e+06	1.8766e+06	1.42111e+06	612477	1813211	1.29467e+06	3343403	478798	785022	805863	1.60902e+06	650783	2454091	1.08087e+06
15633738	246	Gyromitrin	C4H8N2O	None	None	1.65262e+06	487416	830443	1.39596e+06	2385847	2.12343e+06	1716893	666715	1.52429e+06	1.00294e+06	556028	876542	1.83438e+06	831846	1.38615e+06	722339	477803	854194	2.09152e+06	738599	794146	2488358	655423	581463	1.10877e+06	639387	766372	740336	609593	1.16823e+06	1.74091e+06	1.8766e+06	1.42111e+06	612477	1813211	1.29467e+06	3343403	478798	785022	805863	1.60902e+06	650783	2454091	1.08087e+06
15633739	247	4-(beta-Acetylaminoethyl)imidazole	C7H11N3O	Metabolism; Amino acid metabolism	Histidine metabolism	451639	93790.9	268412	196262	173537	479471	263002	130266	229632	196251	243497	158588	282410	133263	389447	137590	108667	177420	108218	593559	105935	311100	243978	114412	453064	119660	181819	108694	242704	261260	203954	639609	280694	114057	141058	223329	1.33104e+06	160668	134091	111258	257619	195289	739239	189783
15633740	247	2,4-Diamino-6-hydroxylaminotoluene	C7H11N3O	Metabolism; Xenobiotics biodegradation and metabolism	Nitrotoluene degradation	451639	93790.9	268412	196262	173537	479471	263002	130266	229632	196251	243497	158588	282410	133263	389447	137590	108667	177420	108218	593559	105935	311100	243978	114412	453064	119660	181819	108694	242704	261260	203954	639609	280694	114057	141058	223329	1.33104e+06	160668	134091	111258	257619	195289	739239	189783
15633752	252	Dihydrourocanate	C6H8N2O2	Metabolism; Amino acid metabolism	Histidine metabolism	123140	72425.4	104825	94566.9	106266	185162	125098	65452.9	105546	85238.7	94630.9	72820.6	148058	71853.6	91030.8	96719.6	50016.9	88134.7	70118.6	189064	64298.2	136485	81417.1	72299.7	198493	94359.4	87888.3	71203.7	81143.6	95826.5	84376.9	269236	100784	59087.4	81510.8	82943.9	302227	94753.3	95006.1	81078.5	115744	87201.6	189802	121036
15633760	254	1-Pyrroline-5-carboxylic acid	C5H7NO2	None	None	65817.9	40001.8	65049.9	51492.2	52848	54237.6	66195.3	33622.4	53542.8	57342.3	51600.1	94606.1	56989.4	35557.4	70241.2	40415	49150	54294.7	42902.2	93177.8	39670.4	64926.4	48017.6	52102.1	77401.1	35357.4	50059.9	38840.9	43134.9	54015.2	55621.3	90773.4	56600.1	47358.9	43103.6	50687	113176	48357.6	58892.9	40795.4	56080.2	58901.2	98383.4	57817.4
15633763	254	1-Pyrroline-2-carboxylate	C5H7NO2	Metabolism; Amino acid metabolism Metabolism; Metabolism of other amino acids	Arginine and proline metabolism D-Arginine and D-ornithine metabolism	65817.9	40001.8	65049.9	51492.2	52848	54237.6	66195.3	33622.4	53542.8	57342.3	51600.1	94606.1	56989.4	35557.4	70241.2	40415	49150	54294.7	42902.2	93177.8	39670.4	64926.4	48017.6	52102.1	77401.1	35357.4	50059.9	38840.9	43134.9	54015.2	55621.3	90773.4	56600.1	47358.9	43103.6	50687	113176	48357.6	58892.9	40795.4	56080.2	58901.2	98383.4	57817.4
15633766	254	Glutarimide	C5H7NO2	None	None	65817.9	40001.8	65049.9	51492.2	52848	54237.6	66195.3	33622.4	53542.8	57342.3	51600.1	94606.1	56989.4	35557.4	70241.2	40415	49150	54294.7	42902.2	93177.8	39670.4	64926.4	48017.6	52102.1	77401.1	35357.4	50059.9	38840.9	43134.9	54015.2	55621.3	90773.4	56600.1	47358.9	43103.6	50687	113176	48357.6	58892.9	40795.4	56080.2	58901.2	98383.4	57817.4
15633767	254	(S)-1-Pyrroline-5-carboxylate	C5H7NO2	Metabolism; Amino acid metabolism Metabolism; Amino acid metabolism	Arginine and proline metabolism Alanine, aspartate and glutamate metabolism	65817.9	40001.8	65049.9	51492.2	52848	54237.6	66195.3	33622.4	53542.8	57342.3	51600.1	94606.1	56989.4	35557.4	70241.2	40415	49150	54294.7	42902.2	93177.8	39670.4	64926.4	48017.6	52102.1	77401.1	35357.4	50059.9	38840.9	43134.9	54015.2	55621.3	90773.4	56600.1	47358.9	43103.6	50687	113176	48357.6	58892.9	40795.4	56080.2	58901.2	98383.4	57817.4
15633768	254	delta-1-Pyrroline-5-carboxylate	C5H7NO2	None	None	65817.9	40001.8	65049.9	51492.2	52848	54237.6	66195.3	33622.4	53542.8	57342.3	51600.1	94606.1	56989.4	35557.4	70241.2	40415	49150	54294.7	42902.2	93177.8	39670.4	64926.4	48017.6	52102.1	77401.1	35357.4	50059.9	38840.9	43134.9	54015.2	55621.3	90773.4	56600.1	47358.9	43103.6	50687	113176	48357.6	58892.9	40795.4	56080.2	58901.2	98383.4	57817.4
15633784	259	L-Theanine	C7H14N2O3	None	None	4712938	2.89873e+06	2.39505e+06	1.32447e+06	3.50289e+06	1.66393e+06	3.02959e+06	1.19625e+06	2646887	4721053	2.71479e+06	2.10885e+06	1.36424e+06	3.76773e+06	612636	3153238	1.21104e+06	2.41182e+06	3776647	3.09738e+06	1.58843e+06	1.29766e+06	1.95901e+06	3.30256e+06	3.49258e+06	3.21275e+06	3155065	3.93531e+06	2.27041e+06	685739	1.23334e+06	4.45949e+06	3153741	2441639	2.67381e+06	2.55772e+06	3.67336e+06	8785954	2.59478e+06	4305191	2.30231e+06	4384328	2783931	4873732
15633785	259	Glycyl-Valine	C7H14N2O3	None	None	4712938	2.89873e+06	2.39505e+06	1.32447e+06	3.50289e+06	1.66393e+06	3.02959e+06	1.19625e+06	2646887	4721053	2.71479e+06	2.10885e+06	1.36424e+06	3.76773e+06	612636	3153238	1.21104e+06	2.41182e+06	3776647	3.09738e+06	1.58843e+06	1.29766e+06	1.95901e+06	3.30256e+06	3.49258e+06	3.21275e+06	3155065	3.93531e+06	2.27041e+06	685739	1.23334e+06	4.45949e+06	3153741	2441639	2.67381e+06	2.55772e+06	3.67336e+06	8785954	2.59478e+06	4305191	2.30231e+06	4384328	2783931	4873732
15633787	259	Valyl-Glycine	C7H14N2O3	None	None	4712938	2.89873e+06	2.39505e+06	1.32447e+06	3.50289e+06	1.66393e+06	3.02959e+06	1.19625e+06	2646887	4721053	2.71479e+06	2.10885e+06	1.36424e+06	3.76773e+06	612636	3153238	1.21104e+06	2.41182e+06	3776647	3.09738e+06	1.58843e+06	1.29766e+06	1.95901e+06	3.30256e+06	3.49258e+06	3.21275e+06	3155065	3.93531e+06	2.27041e+06	685739	1.23334e+06	4.45949e+06	3153741	2441639	2.67381e+06	2.55772e+06	3.67336e+06	8785954	2.59478e+06	4305191	2.30231e+06	4384328	2783931	4873732
15633790	259	N(5)-ethyl-L-glutamine	C7H14N2O3	None	None	4712938	2.89873e+06	2.39505e+06	1.32447e+06	3.50289e+06	1.66393e+06	3.02959e+06	1.19625e+06	2646887	4721053	2.71479e+06	2.10885e+06	1.36424e+06	3.76773e+06	612636	3153238	1.21104e+06	2.41182e+06	3776647	3.09738e+06	1.58843e+06	1.29766e+06	1.95901e+06	3.30256e+06	3.49258e+06	3.21275e+06	3155065	3.93531e+06	2.27041e+06	685739	1.23334e+06	4.45949e+06	3153741	2441639	2.67381e+06	2.55772e+06	3.67336e+06	8785954	2.59478e+06	4305191	2.30231e+06	4384328	2783931	4873732
15633791	259	N-Acetylornithine	C7H14N2O3	Metabolism; Amino acid metabolism	Arginine and proline metabolism	4712938	2.89873e+06	2.39505e+06	1.32447e+06	3.50289e+06	1.66393e+06	3.02959e+06	1.19625e+06	2646887	4721053	2.71479e+06	2.10885e+06	1.36424e+06	3.76773e+06	612636	3153238	1.21104e+06	2.41182e+06	3776647	3.09738e+06	1.58843e+06	1.29766e+06	1.95901e+06	3.30256e+06	3.49258e+06	3.21275e+06	3155065	3.93531e+06	2.27041e+06	685739	1.23334e+06	4.45949e+06	3153741	2441639	2.67381e+06	2.55772e+06	3.67336e+06	8785954	2.59478e+06	4305191	2.30231e+06	4384328	2783931	4873732
15633794	262	L-Methionine	C5H11NO2S	Organismal Systems; Digestive system Metabolism; Biosynthesis of other secondary metabolites Genetic Information Processing; Translation Metabolism; Amino acid metabolism Organismal Systems; Digestive system	Mineral absorption Glucosinolate biosynthesis Aminoacyl-tRNA biosynthesis Cysteine and methionine metabolism Protein digestion and absorption	4747899	4249264	3.77784e+06	6749162	5.19421e+06	5523863	5.7129e+06	3.12802e+06	4.97106e+06	4.8755e+06	5.91603e+06	3.39499e+06	6779254	8.00072e+06	4.74359e+06	5.88468e+06	3.13132e+06	5.38009e+06	4805340	6423908	4.92662e+06	8257758	3.54297e+06	3.22677e+06	7.03037e+06	4.36121e+06	4.86598e+06	2.95346e+06	4758754	4.23717e+06	5.03945e+06	5135048	3.81443e+06	3765414	4.54286e+06	4390014	4887509	5141110	4.04397e+06	3547560	3.71311e+06	3656816	3.25203e+06	3.12074e+06
15633795	262	Penicillamine	C5H11NO2S	None	None	4747899	4249264	3.77784e+06	6749162	5.19421e+06	5523863	5.7129e+06	3.12802e+06	4.97106e+06	4.8755e+06	5.91603e+06	3.39499e+06	6779254	8.00072e+06	4.74359e+06	5.88468e+06	3.13132e+06	5.38009e+06	4805340	6423908	4.92662e+06	8257758	3.54297e+06	3.22677e+06	7.03037e+06	4.36121e+06	4.86598e+06	2.95346e+06	4758754	4.23717e+06	5.03945e+06	5135048	3.81443e+06	3765414	4.54286e+06	4390014	4887509	5141110	4.04397e+06	3547560	3.71311e+06	3656816	3.25203e+06	3.12074e+06
15633796	262	Racemethionine	C5H11NO2S	None	None	4747899	4249264	3.77784e+06	6749162	5.19421e+06	5523863	5.7129e+06	3.12802e+06	4.97106e+06	4.8755e+06	5.91603e+06	3.39499e+06	6779254	8.00072e+06	4.74359e+06	5.88468e+06	3.13132e+06	5.38009e+06	4805340	6423908	4.92662e+06	8257758	3.54297e+06	3.22677e+06	7.03037e+06	4.36121e+06	4.86598e+06	2.95346e+06	4758754	4.23717e+06	5.03945e+06	5135048	3.81443e+06	3765414	4.54286e+06	4390014	4887509	5141110	4.04397e+06	3547560	3.71311e+06	3656816	3.25203e+06	3.12074e+06
15633797	262	Penicillamine	C5H11NO2S	None	None	4747899	4249264	3.77784e+06	6749162	5.19421e+06	5523863	5.7129e+06	3.12802e+06	4.97106e+06	4.8755e+06	5.91603e+06	3.39499e+06	6779254	8.00072e+06	4.74359e+06	5.88468e+06	3.13132e+06	5.38009e+06	4805340	6423908	4.92662e+06	8257758	3.54297e+06	3.22677e+06	7.03037e+06	4.36121e+06	4.86598e+06	2.95346e+06	4758754	4.23717e+06	5.03945e+06	5135048	3.81443e+06	3765414	4.54286e+06	4390014	4887509	5141110	4.04397e+06	3547560	3.71311e+06	3656816	3.25203e+06	3.12074e+06
15633798	262	D-Methionine	C5H11NO2S	Environmental Information Processing; Membrane transport	ABC transporters	4747899	4249264	3.77784e+06	6749162	5.19421e+06	5523863	5.7129e+06	3.12802e+06	4.97106e+06	4.8755e+06	5.91603e+06	3.39499e+06	6779254	8.00072e+06	4.74359e+06	5.88468e+06	3.13132e+06	5.38009e+06	4805340	6423908	4.92662e+06	8257758	3.54297e+06	3.22677e+06	7.03037e+06	4.36121e+06	4.86598e+06	2.95346e+06	4758754	4.23717e+06	5.03945e+06	5135048	3.81443e+06	3765414	4.54286e+06	4390014	4887509	5141110	4.04397e+06	3547560	3.71311e+06	3656816	3.25203e+06	3.12074e+06
15634003	285	L-Tryptophan	C11H12N2O2	Metabolism; Amino acid metabolism Metabolism; Amino acid metabolism Metabolism; Biosynthesis of other secondary metabolites Organismal Systems; Digestive system Organismal Systems; Nervous system Metabolism; Amino acid metabolism Genetic Information Processing; Translation Organismal Systems; Digestive system Human Diseases; Infectious diseases Metabolism; Biosynthesis of other secondary metaboli…	Phenylalanine, tyrosine and tryptophan biosynthesis Tryptophan metabolism Indole alkaloid biosynthesis Mineral absorption Serotonergic synapse Glycine, serine and threonine metabolism Aminoacyl-tRNA biosynthesis Protein digestion and absorption African trypanosomiasis Glucosinolate biosynthesis	5680752	5712933	7.19642e+06	7.21997e+06	5.20546e+06	5.53446e+06	6197963	3.31543e+06	5.69684e+06	5.25627e+06	6.54795e+06	5391586	6.83568e+06	7.54026e+06	4.7129e+06	6.48481e+06	3.45839e+06	5.9382e+06	4854330	6.24523e+06	4.95534e+06	7633190	2.21144e+06	3.27772e+06	6.78584e+06	5.56074e+06	5258038	3885110	3927448	4.40593e+06	6231630	5839991	5655859	5.60869e+06	5.56081e+06	5.58475e+06	5.14274e+06	6.68561e+06	5117077	4.51611e+06	5247217	5.56483e+06	4.91763e+06	4542317
15634004	285	Ethotoin	C11H12N2O2	None	None	5680752	5712933	7.19642e+06	7.21997e+06	5.20546e+06	5.53446e+06	6197963	3.31543e+06	5.69684e+06	5.25627e+06	6.54795e+06	5391586	6.83568e+06	7.54026e+06	4.7129e+06	6.48481e+06	3.45839e+06	5.9382e+06	4854330	6.24523e+06	4.95534e+06	7633190	2.21144e+06	3.27772e+06	6.78584e+06	5.56074e+06	5258038	3885110	3927448	4.40593e+06	6231630	5839991	5655859	5.60869e+06	5.56081e+06	5.58475e+06	5.14274e+06	6.68561e+06	5117077	4.51611e+06	5247217	5.56483e+06	4.91763e+06	4542317
15634006	285	S-nirvanol	C11H12N2O2	None	None	5680752	5712933	7.19642e+06	7.21997e+06	5.20546e+06	5.53446e+06	6197963	3.31543e+06	5.69684e+06	5.25627e+06	6.54795e+06	5391586	6.83568e+06	7.54026e+06	4.7129e+06	6.48481e+06	3.45839e+06	5.9382e+06	4854330	6.24523e+06	4.95534e+06	7633190	2.21144e+06	3.27772e+06	6.78584e+06	5.56074e+06	5258038	3885110	3927448	4.40593e+06	6231630	5839991	5655859	5.60869e+06	5.56081e+06	5.58475e+06	5.14274e+06	6.68561e+06	5117077	4.51611e+06	5247217	5.56483e+06	4.91763e+06	4542317
15634007	285	Nirvanol	C11H12N2O2	None	Anticonvulsants	5680752	5712933	7.19642e+06	7.21997e+06	5.20546e+06	5.53446e+06	6197963	3.31543e+06	5.69684e+06	5.25627e+06	6.54795e+06	5391586	6.83568e+06	7.54026e+06	4.7129e+06	6.48481e+06	3.45839e+06	5.9382e+06	4854330	6.24523e+06	4.95534e+06	7633190	2.21144e+06	3.27772e+06	6.78584e+06	5.56074e+06	5258038	3885110	3927448	4.40593e+06	6231630	5839991	5655859	5.60869e+06	5.56081e+06	5.58475e+06	5.14274e+06	6.68561e+06	5117077	4.51611e+06	5247217	5.56483e+06	4.91763e+06	4542317
15634008	285	4-Hydroxyantipyrine	C11H12N2O2	None	None	5680752	5712933	7.19642e+06	7.21997e+06	5.20546e+06	5.53446e+06	6197963	3.31543e+06	5.69684e+06	5.25627e+06	6.54795e+06	5391586	6.83568e+06	7.54026e+06	4.7129e+06	6.48481e+06	3.45839e+06	5.9382e+06	4854330	6.24523e+06	4.95534e+06	7633190	2.21144e+06	3.27772e+06	6.78584e+06	5.56074e+06	5258038	3885110	3927448	4.40593e+06	6231630	5839991	5655859	5.60869e+06	5.56081e+06	5.58475e+06	5.14274e+06	6.68561e+06	5117077	4.51611e+06	5247217	5.56483e+06	4.91763e+06	4542317
15634010	285	Tryptophan	C11H12N2O2	None	None	5680752	5712933	7.19642e+06	7.21997e+06	5.20546e+06	5.53446e+06	6197963	3.31543e+06	5.69684e+06	5.25627e+06	6.54795e+06	5391586	6.83568e+06	7.54026e+06	4.7129e+06	6.48481e+06	3.45839e+06	5.9382e+06	4854330	6.24523e+06	4.95534e+06	7633190	2.21144e+06	3.27772e+06	6.78584e+06	5.56074e+06	5258038	3885110	3927448	4.40593e+06	6231630	5839991	5655859	5.60869e+06	5.56081e+06	5.58475e+06	5.14274e+06	6.68561e+06	5117077	4.51611e+06	5247217	5.56483e+06	4.91763e+06	4542317
15634011	285	3-Hydroxymethylantipyrine	C11H12N2O2	None	None	5680752	5712933	7.19642e+06	7.21997e+06	5.20546e+06	5.53446e+06	6197963	3.31543e+06	5.69684e+06	5.25627e+06	6.54795e+06	5391586	6.83568e+06	7.54026e+06	4.7129e+06	6.48481e+06	3.45839e+06	5.9382e+06	4854330	6.24523e+06	4.95534e+06	7633190	2.21144e+06	3.27772e+06	6.78584e+06	5.56074e+06	5258038	3885110	3927448	4.40593e+06	6231630	5839991	5655859	5.60869e+06	5.56081e+06	5.58475e+06	5.14274e+06	6.68561e+06	5117077	4.51611e+06	5247217	5.56483e+06	4.91763e+06	4542317
15634013	285	D-Tryptophan	C11H12N2O2	None	None	5680752	5712933	7.19642e+06	7.21997e+06	5.20546e+06	5.53446e+06	6197963	3.31543e+06	5.69684e+06	5.25627e+06	6.54795e+06	5391586	6.83568e+06	7.54026e+06	4.7129e+06	6.48481e+06	3.45839e+06	5.9382e+06	4854330	6.24523e+06	4.95534e+06	7633190	2.21144e+06	3.27772e+06	6.78584e+06	5.56074e+06	5258038	3885110	3927448	4.40593e+06	6231630	5839991	5655859	5.60869e+06	5.56081e+06	5.58475e+06	5.14274e+06	6.68561e+06	5117077	4.51611e+06	5247217	5.56483e+06	4.91763e+06	4542317
15634014	285	Idazoxan	C11H12N2O2	None	None	5680752	5712933	7.19642e+06	7.21997e+06	5.20546e+06	5.53446e+06	6197963	3.31543e+06	5.69684e+06	5.25627e+06	6.54795e+06	5391586	6.83568e+06	7.54026e+06	4.7129e+06	6.48481e+06	3.45839e+06	5.9382e+06	4854330	6.24523e+06	4.95534e+06	7633190	2.21144e+06	3.27772e+06	6.78584e+06	5.56074e+06	5258038	3885110	3927448	4.40593e+06	6231630	5839991	5655859	5.60869e+06	5.56081e+06	5.58475e+06	5.14274e+06	6.68561e+06	5117077	4.51611e+06	5247217	5.56483e+06	4.91763e+06	4542317
15634015	285	Vasicinol	C11H12N2O2	None	None	5680752	5712933	7.19642e+06	7.21997e+06	5.20546e+06	5.53446e+06	6197963	3.31543e+06	5.69684e+06	5.25627e+06	6.54795e+06	5391586	6.83568e+06	7.54026e+06	4.7129e+06	6.48481e+06	3.45839e+06	5.9382e+06	4854330	6.24523e+06	4.95534e+06	7633190	2.21144e+06	3.27772e+06	6.78584e+06	5.56074e+06	5258038	3885110	3927448	4.40593e+06	6231630	5839991	5655859	5.60869e+06	5.56081e+06	5.58475e+06	5.14274e+06	6.68561e+06	5117077	4.51611e+06	5247217	5.56483e+06	4.91763e+06	4542317
15634020	288	Naltriben	C26H25NO4	None	None	70319.2	84126.7	94886.7	83463.7	85978.6	83238.6	84183.3	58915.7	83795.2	71987	83450.1	62938.1	82522.8	86693.4	80302.9	91520	54160.4	81412.8	59657.5	109112	66391.9	87477.8	37328.3	38726.7	99108	70010.4	68201.1	55727.3	55478.5	83342.7	88754.9	107117	73430.4	72582.2	71143	73006.3	64932.7	89801.4	63693.4	64652.9	72699	68598.2	65330.6	77044.1
15634030	290	L-Lysine	C6H14N2O2	Metabolism; Metabolism of cofactors and vitamins Organismal Systems; Digestive system Metabolism; Amino acid metabolism Metabolism; Biosynthesis of other secondary metabolites Metabolism; Amino acid metabolism Genetic Information Processing; Translation Environmental Information Processing; Membrane transport	Biotin metabolism Protein digestion and absorption Lysine degradation Tropane, piperidine and pyridine alkaloid biosynthesis Lysine biosynthesis Aminoacyl-tRNA biosynthesis ABC transporters	3.46859e+06	3.6443e+06	2.57172e+06	5144669	3.17892e+06	2643596	5.2378e+06	1.83138e+06	3.32376e+06	3.77539e+06	4.10889e+06	2.46507e+06	5.70914e+06	5835960	3.55629e+06	5.36891e+06	1.98827e+06	3.94214e+06	4.65497e+06	5516908	4.1792e+06	7620318	2600149	3303841	5178489	4.83217e+06	4743567	2.6376e+06	3.71089e+06	2.46532e+06	4.01846e+06	4.3188e+06	2.39481e+06	2.23243e+06	4.72164e+06	3.17424e+06	3.22316e+06	4663376	2.9313e+06	3.91252e+06	2.99208e+06	2.91635e+06	2.55496e+06	2.44879e+06
15634032	290	(3S,5S)-3,5-Diaminohexanoate	C6H14N2O2	Metabolism; Amino acid metabolism	Lysine degradation	3.46859e+06	3.6443e+06	2.57172e+06	5144669	3.17892e+06	2643596	5.2378e+06	1.83138e+06	3.32376e+06	3.77539e+06	4.10889e+06	2.46507e+06	5.70914e+06	5835960	3.55629e+06	5.36891e+06	1.98827e+06	3.94214e+06	4.65497e+06	5516908	4.1792e+06	7620318	2600149	3303841	5178489	4.83217e+06	4743567	2.6376e+06	3.71089e+06	2.46532e+06	4.01846e+06	4.3188e+06	2.39481e+06	2.23243e+06	4.72164e+06	3.17424e+06	3.22316e+06	4663376	2.9313e+06	3.91252e+06	2.99208e+06	2.91635e+06	2.55496e+06	2.44879e+06
15634033	290	(3S)-3,6-Diaminohexanoate	C6H14N2O2	Metabolism; Amino acid metabolism	Lysine degradation	3.46859e+06	3.6443e+06	2.57172e+06	5144669	3.17892e+06	2643596	5.2378e+06	1.83138e+06	3.32376e+06	3.77539e+06	4.10889e+06	2.46507e+06	5.70914e+06	5835960	3.55629e+06	5.36891e+06	1.98827e+06	3.94214e+06	4.65497e+06	5516908	4.1792e+06	7620318	2600149	3303841	5178489	4.83217e+06	4743567	2.6376e+06	3.71089e+06	2.46532e+06	4.01846e+06	4.3188e+06	2.39481e+06	2.23243e+06	4.72164e+06	3.17424e+06	3.22316e+06	4663376	2.9313e+06	3.91252e+06	2.99208e+06	2.91635e+06	2.55496e+06	2.44879e+06
15634034	290	2,5-Diaminohexanoate	C6H14N2O2	Metabolism; Amino acid metabolism	Lysine degradation	3.46859e+06	3.6443e+06	2.57172e+06	5144669	3.17892e+06	2643596	5.2378e+06	1.83138e+06	3.32376e+06	3.77539e+06	4.10889e+06	2.46507e+06	5.70914e+06	5835960	3.55629e+06	5.36891e+06	1.98827e+06	3.94214e+06	4.65497e+06	5516908	4.1792e+06	7620318	2600149	3303841	5178489	4.83217e+06	4743567	2.6376e+06	3.71089e+06	2.46532e+06	4.01846e+06	4.3188e+06	2.39481e+06	2.23243e+06	4.72164e+06	3.17424e+06	3.22316e+06	4663376	2.9313e+06	3.91252e+06	2.99208e+06	2.91635e+06	2.55496e+06	2.44879e+06
15634035	290	(2R,3R)-3-Methylornithine	C6H14N2O2	Metabolism; Amino acid metabolism	Lysine biosynthesis	3.46859e+06	3.6443e+06	2.57172e+06	5144669	3.17892e+06	2643596	5.2378e+06	1.83138e+06	3.32376e+06	3.77539e+06	4.10889e+06	2.46507e+06	5.70914e+06	5835960	3.55629e+06	5.36891e+06	1.98827e+06	3.94214e+06	4.65497e+06	5516908	4.1792e+06	7620318	2600149	3303841	5178489	4.83217e+06	4743567	2.6376e+06	3.71089e+06	2.46532e+06	4.01846e+06	4.3188e+06	2.39481e+06	2.23243e+06	4.72164e+06	3.17424e+06	3.22316e+06	4663376	2.9313e+06	3.91252e+06	2.99208e+06	2.91635e+06	2.55496e+06	2.44879e+06
15634036	290	D-Lysine	C6H14N2O2	Metabolism; Amino acid metabolism	Lysine degradation	3.46859e+06	3.6443e+06	2.57172e+06	5144669	3.17892e+06	2643596	5.2378e+06	1.83138e+06	3.32376e+06	3.77539e+06	4.10889e+06	2.46507e+06	5.70914e+06	5835960	3.55629e+06	5.36891e+06	1.98827e+06	3.94214e+06	4.65497e+06	5516908	4.1792e+06	7620318	2600149	3303841	5178489	4.83217e+06	4743567	2.6376e+06	3.71089e+06	2.46532e+06	4.01846e+06	4.3188e+06	2.39481e+06	2.23243e+06	4.72164e+06	3.17424e+06	3.22316e+06	4663376	2.9313e+06	3.91252e+06	2.99208e+06	2.91635e+06	2.55496e+06	2.44879e+06
15634038	290	Lysine	C6H14N2O2	None	None	3.46859e+06	3.6443e+06	2.57172e+06	5144669	3.17892e+06	2643596	5.2378e+06	1.83138e+06	3.32376e+06	3.77539e+06	4.10889e+06	2.46507e+06	5.70914e+06	5835960	3.55629e+06	5.36891e+06	1.98827e+06	3.94214e+06	4.65497e+06	5516908	4.1792e+06	7620318	2600149	3303841	5178489	4.83217e+06	4743567	2.6376e+06	3.71089e+06	2.46532e+06	4.01846e+06	4.3188e+06	2.39481e+06	2.23243e+06	4.72164e+06	3.17424e+06	3.22316e+06	4663376	2.9313e+06	3.91252e+06	2.99208e+06	2.91635e+06	2.55496e+06	2.44879e+06
15634052	303	Cilastatin	C16H26N2O5S	None	None	29646	26091.7	22530.3	50639.6	27195.7	18091.3	44034.6	9323.75	26643.7	28286.7	53457.4	19078.8	55613.3	52252.9	24099.8	47130.8	10751.1	37708.7	40221.3	49918	34704.5	75230.7	23878.5	19670.7	47998.1	43961	42091.2	14153.8	49434.3	19821.8	29602.4	41388.5	15845.2	14719.9	44118.7	24712.1	33772.1	40260.9	20193.2	40090.3	16582.1	27604	17250.1	18588.8
15634054	305	Lipoic acid	C8H14O2S2	None	None	41148.2	37656.9	34813.2	46154.1	40049.3	32819.4	49067	21614.1	38853.1	38294.5	53403.3	24211.1	42683.2	45966.5	38430.6	43968.9	23896.1	40556.9	45635	60570.9	36866.1	61026.6	33458.5	32453.1	44810.8	41785.7	43298.3	23910.3	37776.4	27117.7	46801.7	45649.8	28740.4	21745.5	40148.1	33258.4	33605.6	45698.3	30312.8	35756.3	33604.3	32347.4	25509.6	24149.5
15634055	305	Lipoate	C8H14O2S2	Metabolism; Metabolism of cofactors and vitamins	Lipoic acid metabolism	41148.2	37656.9	34813.2	46154.1	40049.3	32819.4	49067	21614.1	38853.1	38294.5	53403.3	24211.1	42683.2	45966.5	38430.6	43968.9	23896.1	40556.9	45635	60570.9	36866.1	61026.6	33458.5	32453.1	44810.8	41785.7	43298.3	23910.3	37776.4	27117.7	46801.7	45649.8	28740.4	21745.5	40148.1	33258.4	33605.6	45698.3	30312.8	35756.3	33604.3	32347.4	25509.6	24149.5
15634065	310	Metoxuron	C10H13ClN2O2	None	None	24692.6	29048.3	19315.1	28266.7	28351.8	16751.8	31053.7	15336.5	26479.7	22354.7	31646.5	15968.7	27212.8	31517.4	22249.6	29842.2	12217.1	24783.7	24309	37169.4	24296	45464.1	21125.6	19095.9	31447.5	28021.3	26165.2	16421.9	24861.3	13870.8	22093.9	25923.8	14343	15488.7	30767	19257.9	19312.4	25929.3	13915.6	24752.7	17410.5	24114.7	18615.9	16947.4
15634095	312	10-bromo-decanoic acid	C10H19BrO2	None	None	15024.2	28782.6	14848.8	26057.1	20468.2	14955.7	26098.2	17215.9	18842.1	18318.2	27186.6	18774.1	26554	36910.5	18656	22231.4	15153.3	20502.7	24125.4	20786.5	22415.5	29408.7	15420.9	21604.1	20655.8	22181	21892.5	12707.3	18441.4	14990.7	25943.6	22707.3	14211.9	15511.4	28026.3	16976.4	16228.2	19077.3	16084.8	23810.9	17901	16544.9	18646.4	15593
15634096	312	2-bromo-decanoic acid	C10H19BrO2	None	None	15024.2	28782.6	14848.8	26057.1	20468.2	14955.7	26098.2	17215.9	18842.1	18318.2	27186.6	18774.1	26554	36910.5	18656	22231.4	15153.3	20502.7	24125.4	20786.5	22415.5	29408.7	15420.9	21604.1	20655.8	22181	21892.5	12707.3	18441.4	14990.7	25943.6	22707.3	14211.9	15511.4	28026.3	16976.4	16228.2	19077.3	16084.8	23810.9	17901	16544.9	18646.4	15593
15634097	312	9-bromo-decanoic acid	C10H19BrO2	None	None	15024.2	28782.6	14848.8	26057.1	20468.2	14955.7	26098.2	17215.9	18842.1	18318.2	27186.6	18774.1	26554	36910.5	18656	22231.4	15153.3	20502.7	24125.4	20786.5	22415.5	29408.7	15420.9	21604.1	20655.8	22181	21892.5	12707.3	18441.4	14990.7	25943.6	22707.3	14211.9	15511.4	28026.3	16976.4	16228.2	19077.3	16084.8	23810.9	17901	16544.9	18646.4	15593
15634138	316	L-homoserine	C4H9NO3	Metabolism; Energy metabolism Metabolism; Amino acid metabolism Metabolism; Amino acid metabolism Metabolism; Amino acid metabolism	Sulfur metabolism Cysteine and methionine metabolism Lysine biosynthesis Glycine, serine and threonine metabolism	3.52504e+06	4.70546e+06	3.73783e+06	7.16896e+06	5.49573e+06	3.99251e+06	4.78685e+06	2.07598e+06	4.34899e+06	4.44637e+06	6.01866e+06	3438100	6295522	5.78268e+06	7189179	5.18485e+06	2.34347e+06	5483766	3567830	6156051	3693748	6575876	2912036	3.15501e+06	6024480	4.81645e+06	4.2551e+06	3.71429e+06	2.40748e+06	2771464	5249669	4823404	4.1096e+06	6.94195e+06	4.62697e+06	4368285	4871927	5.00498e+06	3.20875e+06	4332109	3.48467e+06	3.64983e+06	3.46003e+06	2.9848e+06
15634139	316	L-Threonine	C4H9NO3	Organismal Systems; Digestive system Metabolism; Amino acid metabolism Metabolism; Metabolism of cofactors and vitamins Metabolism; Amino acid metabolism Organismal Systems; Digestive system Environmental Information Processing; Membrane transport BMA Synthesis Genetic Information Processing; Translation	Protein digestion and absorption Glycine, serine and threonine metabolism Porphyrin and chlorophyll metabolism Valine, leucine and isoleucine biosynthesis Mineral absorption ABC transporters IG-Amino-acid Biosynthesis 2 Aminoacyl-tRNA biosynthesis	3.52504e+06	4.70546e+06	3.73783e+06	7.16896e+06	5.49573e+06	3.99251e+06	4.78685e+06	2.07598e+06	4.34899e+06	4.44637e+06	6.01866e+06	3438100	6295522	5.78268e+06	7189179	5.18485e+06	2.34347e+06	5483766	3567830	6156051	3693748	6575876	2912036	3.15501e+06	6024480	4.81645e+06	4.2551e+06	3.71429e+06	2.40748e+06	2771464	5249669	4823404	4.1096e+06	6.94195e+06	4.62697e+06	4368285	4871927	5.00498e+06	3.20875e+06	4332109	3.48467e+06	3.64983e+06	3.46003e+06	2.9848e+06
15634140	316	L-Allothreonine	C4H9NO3	Metabolism; Amino acid metabolism	Glycine, serine and threonine metabolism	3.52504e+06	4.70546e+06	3.73783e+06	7.16896e+06	5.49573e+06	3.99251e+06	4.78685e+06	2.07598e+06	4.34899e+06	4.44637e+06	6.01866e+06	3438100	6295522	5.78268e+06	7189179	5.18485e+06	2.34347e+06	5483766	3567830	6156051	3693748	6575876	2912036	3.15501e+06	6024480	4.81645e+06	4.2551e+06	3.71429e+06	2.40748e+06	2771464	5249669	4823404	4.1096e+06	6.94195e+06	4.62697e+06	4368285	4871927	5.00498e+06	3.20875e+06	4332109	3.48467e+06	3.64983e+06	3.46003e+06	2.9848e+06
15634141	316	4-Amino-3-hydroxybutanoate	C4H9NO3	None	None	3.52504e+06	4.70546e+06	3.73783e+06	7.16896e+06	5.49573e+06	3.99251e+06	4.78685e+06	2.07598e+06	4.34899e+06	4.44637e+06	6.01866e+06	3438100	6295522	5.78268e+06	7189179	5.18485e+06	2.34347e+06	5483766	3567830	6156051	3693748	6575876	2912036	3.15501e+06	6024480	4.81645e+06	4.2551e+06	3.71429e+06	2.40748e+06	2771464	5249669	4823404	4.1096e+06	6.94195e+06	4.62697e+06	4368285	4871927	5.00498e+06	3.20875e+06	4332109	3.48467e+06	3.64983e+06	3.46003e+06	2.9848e+06
15634142	316	Hydroxyethyl glycine	C4H9NO3	None	None	3.52504e+06	4.70546e+06	3.73783e+06	7.16896e+06	5.49573e+06	3.99251e+06	4.78685e+06	2.07598e+06	4.34899e+06	4.44637e+06	6.01866e+06	3438100	6295522	5.78268e+06	7189179	5.18485e+06	2.34347e+06	5483766	3567830	6156051	3693748	6575876	2912036	3.15501e+06	6024480	4.81645e+06	4.2551e+06	3.71429e+06	2.40748e+06	2771464	5249669	4823404	4.1096e+06	6.94195e+06	4.62697e+06	4368285	4871927	5.00498e+06	3.20875e+06	4332109	3.48467e+06	3.64983e+06	3.46003e+06	2.9848e+06
15634143	316	D-Threonine	C4H9NO3	None	None	3.52504e+06	4.70546e+06	3.73783e+06	7.16896e+06	5.49573e+06	3.99251e+06	4.78685e+06	2.07598e+06	4.34899e+06	4.44637e+06	6.01866e+06	3438100	6295522	5.78268e+06	7189179	5.18485e+06	2.34347e+06	5483766	3567830	6156051	3693748	6575876	2912036	3.15501e+06	6024480	4.81645e+06	4.2551e+06	3.71429e+06	2.40748e+06	2771464	5249669	4823404	4.1096e+06	6.94195e+06	4.62697e+06	4368285	4871927	5.00498e+06	3.20875e+06	4332109	3.48467e+06	3.64983e+06	3.46003e+06	2.9848e+06
15634144	316	(-)-erythro-(2R,3R)-Dihydroxybutylamide	C4H9NO3	None	None	3.52504e+06	4.70546e+06	3.73783e+06	7.16896e+06	5.49573e+06	3.99251e+06	4.78685e+06	2.07598e+06	4.34899e+06	4.44637e+06	6.01866e+06	3438100	6295522	5.78268e+06	7189179	5.18485e+06	2.34347e+06	5483766	3567830	6156051	3693748	6575876	2912036	3.15501e+06	6024480	4.81645e+06	4.2551e+06	3.71429e+06	2.40748e+06	2771464	5249669	4823404	4.1096e+06	6.94195e+06	4.62697e+06	4368285	4871927	5.00498e+06	3.20875e+06	4332109	3.48467e+06	3.64983e+06	3.46003e+06	2.9848e+06
15634145	316	D-Allothreonine	C4H9NO3	None	None	3.52504e+06	4.70546e+06	3.73783e+06	7.16896e+06	5.49573e+06	3.99251e+06	4.78685e+06	2.07598e+06	4.34899e+06	4.44637e+06	6.01866e+06	3438100	6295522	5.78268e+06	7189179	5.18485e+06	2.34347e+06	5483766	3567830	6156051	3693748	6575876	2912036	3.15501e+06	6024480	4.81645e+06	4.2551e+06	3.71429e+06	2.40748e+06	2771464	5249669	4823404	4.1096e+06	6.94195e+06	4.62697e+06	4368285	4871927	5.00498e+06	3.20875e+06	4332109	3.48467e+06	3.64983e+06	3.46003e+06	2.9848e+06
15634146	316	2-Methylserine	C4H9NO3	None	None	3.52504e+06	4.70546e+06	3.73783e+06	7.16896e+06	5.49573e+06	3.99251e+06	4.78685e+06	2.07598e+06	4.34899e+06	4.44637e+06	6.01866e+06	3438100	6295522	5.78268e+06	7189179	5.18485e+06	2.34347e+06	5483766	3567830	6156051	3693748	6575876	2912036	3.15501e+06	6024480	4.81645e+06	4.2551e+06	3.71429e+06	2.40748e+06	2771464	5249669	4823404	4.1096e+06	6.94195e+06	4.62697e+06	4368285	4871927	5.00498e+06	3.20875e+06	4332109	3.48467e+06	3.64983e+06	3.46003e+06	2.9848e+06
15634150	319	Glycerophosphocholine	C8H20NO6P	None	None	2698993	1.47235e+06	1.77201e+06	2.45765e+06	1.80413e+06	1.37326e+06	2.50767e+06	1.37281e+06	1.78807e+06	1.9051e+06	1521769	1.61396e+06	2.45579e+06	3.97056e+06	2.133e+06	2660000	1665582	2.01905e+06	1.66776e+06	2.22963e+06	1.18244e+06	7130549	2.67631e+06	1.39334e+06	4.35722e+06	1.91494e+06	2072287	1.76842e+06	643380	1.1719e+06	1.72182e+06	2659425	1.59348e+06	1360489	2.00016e+06	1.65765e+06	828078	1.24522e+06	2.32118e+06	1.34507e+06	1.47752e+06	1.71736e+06	1892812	890673
15634173	319	sn-glycero-3-Phosphocholine	C8H20NO6P	None	None	2698993	1.47235e+06	1.77201e+06	2.45765e+06	1.80413e+06	1.37326e+06	2.50767e+06	1.37281e+06	1.78807e+06	1.9051e+06	1521769	1.61396e+06	2.45579e+06	3.97056e+06	2.133e+06	2660000	1665582	2.01905e+06	1.66776e+06	2.22963e+06	1.18244e+06	7130549	2.67631e+06	1.39334e+06	4.35722e+06	1.91494e+06	2072287	1.76842e+06	643380	1.1719e+06	1.72182e+06	2659425	1.59348e+06	1360489	2.00016e+06	1.65765e+06	828078	1.24522e+06	2.32118e+06	1.34507e+06	1.47752e+06	1.71736e+06	1892812	890673
15634303	353	Secobarbital	C12H18N2O3	None	None	4.68098e+06	6.12034e+06	4.51802e+06	5.34888e+06	5582959	4.84258e+06	4.15972e+06	4489856	4.76178e+06	5.39347e+06	5.32094e+06	5360852	4.91452e+06	4885025	4.37984e+06	4.65413e+06	4.01667e+06	4.89977e+06	6.09553e+06	5839866	5162858	4.61835e+06	4.15271e+06	4347140	5221654	5377070	5192256	4.94833e+06	4499885	4.10251e+06	4.49631e+06	5.14395e+06	4576132	5239023	5.14648e+06	4.76223e+06	4476725	4863215	4.90644e+06	5165027	3945870	4255034	4.50843e+06	5.33248e+06
15634326	357	Zinnimidine	C15H19NO3	None	None	143913	177777	155903	159993	135793	156454	155099	147797	155501	158884	192651	160353	179143	167156	180357	152270	161883	164520	185778	177572	180939	110949	149612	131821	174631	174654	174642	129213	199150	138461	131026	140812	160104	180075	162783	150458	136542	175803	142338	196426	150019	159281	155053	173124
15634328	357	Cochlearine	C15H19NO3	None	None	143913	177777	155903	159993	135793	156454	155099	147797	155501	158884	192651	160353	179143	167156	180357	152270	161883	164520	185778	177572	180939	110949	149612	131821	174631	174654	174642	129213	199150	138461	131026	140812	160104	180075	162783	150458	136542	175803	142338	196426	150019	159281	155053	173124
15634331	357	cis-1,3,4,6,7,11b-Hexahydro-9-methoxy-2H-benzo[a]quinolizine-3-carboxylic acid	C15H19NO3	None	None	143913	177777	155903	159993	135793	156454	155099	147797	155501	158884	192651	160353	179143	167156	180357	152270	161883	164520	185778	177572	180939	110949	149612	131821	174631	174654	174642	129213	199150	138461	131026	140812	160104	180075	162783	150458	136542	175803	142338	196426	150019	159281	155053	173124
15634334	359	Metalaxyl	C15H21NO4	None	None	41686.8	64488.6	60936	41497.4	51388.1	36827.2	32635.3	36461.1	41592.1	80864.2	71087.1	52246.1	58033.6	61369.3	65291.4	41447.6	41445.9	59701.5	138911	52082.8	45258.1	61500.3	35391.9	37640.2	46137.6	53255.9	49110.2	57052.8	76704.9	48358.8	46580.3	64034.2	42545.1	66376.4	52808.4	54930.6	50201.2	57459.9	61967.1	49427.6	31036.7	56955.3	54004.8	55929.4
15634336	359	Metalaxyl-M	C15H21NO4	None	None	41686.8	64488.6	60936	41497.4	51388.1	36827.2	32635.3	36461.1	41592.1	80864.2	71087.1	52246.1	58033.6	61369.3	65291.4	41447.6	41445.9	59701.5	138911	52082.8	45258.1	61500.3	35391.9	37640.2	46137.6	53255.9	49110.2	57052.8	76704.9	48358.8	46580.3	64034.2	42545.1	66376.4	52808.4	54930.6	50201.2	57459.9	61967.1	49427.6	31036.7	56955.3	54004.8	55929.4
15634338	360	3-Hydroxymelatonin	C13H18N2O3	None	None	65736.4	65750.3	78719.7	68513.5	74985.7	76987.2	53390.1	59351.4	67131.9	65100.8	93986.3	59819.6	93304.7	95087.7	70398.4	64920.2	55270	67749.6	62376.7	99162	81382.6	68151	79722.3	71824.6	103988	87723.1	80552.5	53797	78138.4	60728.8	52187.1	71783.1	71824	69189.8	82313	70486.4	58886.5	67337.8	67133.1	66608.6	65972.8	71783.2	53381.9	70257.2
15634339	360	Paucine	C13H18N2O3	None	None	65736.4	65750.3	78719.7	68513.5	74985.7	76987.2	53390.1	59351.4	67131.9	65100.8	93986.3	59819.6	93304.7	95087.7	70398.4	64920.2	55270	67749.6	62376.7	99162	81382.6	68151	79722.3	71824.6	103988	87723.1	80552.5	53797	78138.4	60728.8	52187.1	71783.1	71824	69189.8	82313	70486.4	58886.5	67337.8	67133.1	66608.6	65972.8	71783.2	53381.9	70257.2
15634340	360	Heptabarbital	C13H18N2O3	None	None	65736.4	65750.3	78719.7	68513.5	74985.7	76987.2	53390.1	59351.4	67131.9	65100.8	93986.3	59819.6	93304.7	95087.7	70398.4	64920.2	55270	67749.6	62376.7	99162	81382.6	68151	79722.3	71824.6	103988	87723.1	80552.5	53797	78138.4	60728.8	52187.1	71783.1	71824	69189.8	82313	70486.4	58886.5	67337.8	67133.1	66608.6	65972.8	71783.2	53381.9	70257.2
15634341	360	4-Coumaroyl-2-hydroxyputrescine	C13H18N2O3	None	None	65736.4	65750.3	78719.7	68513.5	74985.7	76987.2	53390.1	59351.4	67131.9	65100.8	93986.3	59819.6	93304.7	95087.7	70398.4	64920.2	55270	67749.6	62376.7	99162	81382.6	68151	79722.3	71824.6	103988	87723.1	80552.5	53797	78138.4	60728.8	52187.1	71783.1	71824	69189.8	82313	70486.4	58886.5	67337.8	67133.1	66608.6	65972.8	71783.2	53381.9	70257.2
15634346	360	N-Caffeoylputrescine	C13H18N2O3	None	None	65736.4	65750.3	78719.7	68513.5	74985.7	76987.2	53390.1	59351.4	67131.9	65100.8	93986.3	59819.6	93304.7	95087.7	70398.4	64920.2	55270	67749.6	62376.7	99162	81382.6	68151	79722.3	71824.6	103988	87723.1	80552.5	53797	78138.4	60728.8	52187.1	71783.1	71824	69189.8	82313	70486.4	58886.5	67337.8	67133.1	66608.6	65972.8	71783.2	53381.9	70257.2
15634356	361	Anisomycin	C14H19NO4	None	None	17999.8	25250.2	26150.2	16921.2	21653.4	20815.5	16026.8	23937.9	21234.5	18462.8	25278.1	36974.5	24703.5	34405.3	58896.9	18031.7	19004.6	24990.8	35541.4	32568	16266.2	17818.5	17225.9	21810.4	15610.9	20561.6	19190	25619.6	97542.1	20633.4	16899.9	21521.6	18955.6	35681.3	25940.7	23570.6	27647.2	19226.9	12778.6	19402.1	15651	25103.9	15125.1	21872.3
15634357	361	N(alpha)-Benzyloxycarbonyl-L-leucine	C14H19NO4	None	None	17999.8	25250.2	26150.2	16921.2	21653.4	20815.5	16026.8	23937.9	21234.5	18462.8	25278.1	36974.5	24703.5	34405.3	58896.9	18031.7	19004.6	24990.8	35541.4	32568	16266.2	17818.5	17225.9	21810.4	15610.9	20561.6	19190	25619.6	97542.1	20633.4	16899.9	21521.6	18955.6	35681.3	25940.7	23570.6	27647.2	19226.9	12778.6	19402.1	15651	25103.9	15125.1	21872.3
15634378	364	Myristoylglycine	C16H31NO3	None	None	34474.9	42520	42401	47121.2	37698.7	24399.8	33318.4	35119.1	36408.9	56060.8	41810.2	41194.3	44114.3	45305.1	32923.7	46694.3	60878.1	44709.7	38291.6	30546.1	34785.9	50969.6	32844.2	57736.7	44044	52515.3	41167.8	35761.8	45068.7	34036.2	44007	44934.7	69694.6	37682.6	49948.8	44470.9	32070.7	62486.6	30920.8	33187.9	45252.1	52047.9	37114.4	35068.6
15634499	377	2,6-Dibromohydroquinone	C6H4Br2O2	Metabolism; Xenobiotics biodegradation and metabolism	Fluorobenzoate degradation	434155	333843	383611	377935	415783	410832	394439	363002	389025	415687	385247	374993	378626	354555	419365	381457	366671	380042	406939	382852	436055	373588	418077	369112	392505	406656	399580	372442	407695	428562	375679	405788	406346	369052	417274	406067	447032	385392	396504	406689	383425	410274	338195	390215
15634513	463	Irbesartan	C25H28N6O	None	None	46166.6	46081.3	41501.2	38957	42857.3	47590.5	40128.4	39544.5	42179.3	40312.2	40087.3	35810.4	46276.8	45829.5	42818.9	33505.6	36373.2	40199.7	44294.9	42533.3	47140	36296.6	41620.9	40140.3	36733.8	38788.7	40880.6	29558.5	43627.4	52068.7	41856	46703.2	38315	37194.1	46902.2	42741.7	53198.6	46876.4	37294.9	44919.9	42232.2	47344.7	39082.5	39294.9
15634602	516	Phosphocreatinine	C4H8N3O4P	None	None	14412.9	25406.1	14075.1	18396.1	16540.4	15522.1	24803	13777.7	16031.2	13689.9	22649.7	12902.5	22652.9	26304.7	22969.7	23910.6	14722.6	22651.3	21642.9	28847.6	17783.9	27466.3	16194.7	21171.8	23518.6	18855.2	21407.4	15293.9	15945.8	20234	20409.5	18339.4	18683.6	12414.6	21219.6	18511.5	21132.7	23033.4	12077.7	16481.4	18859	16165.2	9588.8	15016.9
15634619	531	PC(20:3(8Z,11Z,14Z)/20:1(11Z))	C48H88NO8P	None	None	2979307	2.74672e+06	2.66239e+06	2.59578e+06	3912666	2.91398e+06	2.94318e+06	2.56156e+06	2.83035e+06	2.57708e+06	2.59746e+06	2.30418e+06	2862855	5342614	2.10575e+06	2.81136e+06	2.46599e+06	2.58727e+06	2.14291e+06	2.4296e+06	1.36362e+06	2.46795e+06	829662	923151	3.22636e+06	4007341	2.28625e+06	1.72167e+06	1.1049e+06	2.33734e+06	2.02397e+06	3.29343e+06	2015373	3.71249e+06	4654788	2.18066e+06	3.95155e+06	2.88202e+06	2.36412e+06	3.49809e+06	3.52031e+06	3.1296e+06	2.65841e+06	3.78365e+06
15634620	531	PC(20:1(11Z)/20:3(8Z,11Z,14Z))	C48H88NO8P	None	None	2979307	2.74672e+06	2.66239e+06	2.59578e+06	3912666	2.91398e+06	2.94318e+06	2.56156e+06	2.83035e+06	2.57708e+06	2.59746e+06	2.30418e+06	2862855	5342614	2.10575e+06	2.81136e+06	2.46599e+06	2.58727e+06	2.14291e+06	2.4296e+06	1.36362e+06	2.46795e+06	829662	923151	3.22636e+06	4007341	2.28625e+06	1.72167e+06	1.1049e+06	2.33734e+06	2.02397e+06	3.29343e+06	2015373	3.71249e+06	4654788	2.18066e+06	3.95155e+06	2.88202e+06	2.36412e+06	3.49809e+06	3.52031e+06	3.1296e+06	2.65841e+06	3.78365e+06
15634621	531	PC(20:1(11Z)/20:3(5Z,8Z,11Z))	C48H88NO8P	None	None	2979307	2.74672e+06	2.66239e+06	2.59578e+06	3912666	2.91398e+06	2.94318e+06	2.56156e+06	2.83035e+06	2.57708e+06	2.59746e+06	2.30418e+06	2862855	5342614	2.10575e+06	2.81136e+06	2.46599e+06	2.58727e+06	2.14291e+06	2.4296e+06	1.36362e+06	2.46795e+06	829662	923151	3.22636e+06	4007341	2.28625e+06	1.72167e+06	1.1049e+06	2.33734e+06	2.02397e+06	3.29343e+06	2015373	3.71249e+06	4654788	2.18066e+06	3.95155e+06	2.88202e+06	2.36412e+06	3.49809e+06	3.52031e+06	3.1296e+06	2.65841e+06	3.78365e+06
15634623	531	PC(20:3(5Z,8Z,11Z)/20:1(11Z))	C48H88NO8P	None	None	2979307	2.74672e+06	2.66239e+06	2.59578e+06	3912666	2.91398e+06	2.94318e+06	2.56156e+06	2.83035e+06	2.57708e+06	2.59746e+06	2.30418e+06	2862855	5342614	2.10575e+06	2.81136e+06	2.46599e+06	2.58727e+06	2.14291e+06	2.4296e+06	1.36362e+06	2.46795e+06	829662	923151	3.22636e+06	4007341	2.28625e+06	1.72167e+06	1.1049e+06	2.33734e+06	2.02397e+06	3.29343e+06	2015373	3.71249e+06	4654788	2.18066e+06	3.95155e+06	2.88202e+06	2.36412e+06	3.49809e+06	3.52031e+06	3.1296e+06	2.65841e+06	3.78365e+06
15634624	531	PC(20:2(11Z,14Z)/20:2(11Z,14Z))	C48H88NO8P	None	None	2979307	2.74672e+06	2.66239e+06	2.59578e+06	3912666	2.91398e+06	2.94318e+06	2.56156e+06	2.83035e+06	2.57708e+06	2.59746e+06	2.30418e+06	2862855	5342614	2.10575e+06	2.81136e+06	2.46599e+06	2.58727e+06	2.14291e+06	2.4296e+06	1.36362e+06	2.46795e+06	829662	923151	3.22636e+06	4007341	2.28625e+06	1.72167e+06	1.1049e+06	2.33734e+06	2.02397e+06	3.29343e+06	2015373	3.71249e+06	4654788	2.18066e+06	3.95155e+06	2.88202e+06	2.36412e+06	3.49809e+06	3.52031e+06	3.1296e+06	2.65841e+06	3.78365e+06
15634625	531	PC(22:0/18:4(6Z,9Z,12Z,15Z))	C48H88NO8P	None	None	2979307	2.74672e+06	2.66239e+06	2.59578e+06	3912666	2.91398e+06	2.94318e+06	2.56156e+06	2.83035e+06	2.57708e+06	2.59746e+06	2.30418e+06	2862855	5342614	2.10575e+06	2.81136e+06	2.46599e+06	2.58727e+06	2.14291e+06	2.4296e+06	1.36362e+06	2.46795e+06	829662	923151	3.22636e+06	4007341	2.28625e+06	1.72167e+06	1.1049e+06	2.33734e+06	2.02397e+06	3.29343e+06	2015373	3.71249e+06	4654788	2.18066e+06	3.95155e+06	2.88202e+06	2.36412e+06	3.49809e+06	3.52031e+06	3.1296e+06	2.65841e+06	3.78365e+06
15634627	531	PC(20:4(5Z,8Z,11Z,14Z)/20:0)	C48H88NO8P	None	None	2979307	2.74672e+06	2.66239e+06	2.59578e+06	3912666	2.91398e+06	2.94318e+06	2.56156e+06	2.83035e+06	2.57708e+06	2.59746e+06	2.30418e+06	2862855	5342614	2.10575e+06	2.81136e+06	2.46599e+06	2.58727e+06	2.14291e+06	2.4296e+06	1.36362e+06	2.46795e+06	829662	923151	3.22636e+06	4007341	2.28625e+06	1.72167e+06	1.1049e+06	2.33734e+06	2.02397e+06	3.29343e+06	2015373	3.71249e+06	4654788	2.18066e+06	3.95155e+06	2.88202e+06	2.36412e+06	3.49809e+06	3.52031e+06	3.1296e+06	2.65841e+06	3.78365e+06
15634628	531	PC(20:4(8Z,11Z,14Z,17Z)/20:0)	C48H88NO8P	None	None	2979307	2.74672e+06	2.66239e+06	2.59578e+06	3912666	2.91398e+06	2.94318e+06	2.56156e+06	2.83035e+06	2.57708e+06	2.59746e+06	2.30418e+06	2862855	5342614	2.10575e+06	2.81136e+06	2.46599e+06	2.58727e+06	2.14291e+06	2.4296e+06	1.36362e+06	2.46795e+06	829662	923151	3.22636e+06	4007341	2.28625e+06	1.72167e+06	1.1049e+06	2.33734e+06	2.02397e+06	3.29343e+06	2015373	3.71249e+06	4654788	2.18066e+06	3.95155e+06	2.88202e+06	2.36412e+06	3.49809e+06	3.52031e+06	3.1296e+06	2.65841e+06	3.78365e+06
15634629	531	PC(22:4(7Z,10Z,13Z,16Z)/18:0)	C48H88NO8P	None	None	2979307	2.74672e+06	2.66239e+06	2.59578e+06	3912666	2.91398e+06	2.94318e+06	2.56156e+06	2.83035e+06	2.57708e+06	2.59746e+06	2.30418e+06	2862855	5342614	2.10575e+06	2.81136e+06	2.46599e+06	2.58727e+06	2.14291e+06	2.4296e+06	1.36362e+06	2.46795e+06	829662	923151	3.22636e+06	4007341	2.28625e+06	1.72167e+06	1.1049e+06	2.33734e+06	2.02397e+06	3.29343e+06	2015373	3.71249e+06	4654788	2.18066e+06	3.95155e+06	2.88202e+06	2.36412e+06	3.49809e+06	3.52031e+06	3.1296e+06	2.65841e+06	3.78365e+06
15634630	531	PC(22:1(13Z)/18:3(9Z,12Z,15Z))	C48H88NO8P	None	None	2979307	2.74672e+06	2.66239e+06	2.59578e+06	3912666	2.91398e+06	2.94318e+06	2.56156e+06	2.83035e+06	2.57708e+06	2.59746e+06	2.30418e+06	2862855	5342614	2.10575e+06	2.81136e+06	2.46599e+06	2.58727e+06	2.14291e+06	2.4296e+06	1.36362e+06	2.46795e+06	829662	923151	3.22636e+06	4007341	2.28625e+06	1.72167e+06	1.1049e+06	2.33734e+06	2.02397e+06	3.29343e+06	2015373	3.71249e+06	4654788	2.18066e+06	3.95155e+06	2.88202e+06	2.36412e+06	3.49809e+06	3.52031e+06	3.1296e+06	2.65841e+06	3.78365e+06
15634631	531	PC(22:1(13Z)/18:3(6Z,9Z,12Z))	C48H88NO8P	None	None	2979307	2.74672e+06	2.66239e+06	2.59578e+06	3912666	2.91398e+06	2.94318e+06	2.56156e+06	2.83035e+06	2.57708e+06	2.59746e+06	2.30418e+06	2862855	5342614	2.10575e+06	2.81136e+06	2.46599e+06	2.58727e+06	2.14291e+06	2.4296e+06	1.36362e+06	2.46795e+06	829662	923151	3.22636e+06	4007341	2.28625e+06	1.72167e+06	1.1049e+06	2.33734e+06	2.02397e+06	3.29343e+06	2015373	3.71249e+06	4654788	2.18066e+06	3.95155e+06	2.88202e+06	2.36412e+06	3.49809e+06	3.52031e+06	3.1296e+06	2.65841e+06	3.78365e+06
15634633	531	PC(22:2(13Z,16Z)/18:2(9Z,12Z))	C48H88NO8P	None	None	2979307	2.74672e+06	2.66239e+06	2.59578e+06	3912666	2.91398e+06	2.94318e+06	2.56156e+06	2.83035e+06	2.57708e+06	2.59746e+06	2.30418e+06	2862855	5342614	2.10575e+06	2.81136e+06	2.46599e+06	2.58727e+06	2.14291e+06	2.4296e+06	1.36362e+06	2.46795e+06	829662	923151	3.22636e+06	4007341	2.28625e+06	1.72167e+06	1.1049e+06	2.33734e+06	2.02397e+06	3.29343e+06	2015373	3.71249e+06	4654788	2.18066e+06	3.95155e+06	2.88202e+06	2.36412e+06	3.49809e+06	3.52031e+06	3.1296e+06	2.65841e+06	3.78365e+06
15634636	531	PC(18:0/22:4(7Z,10Z,13Z,16Z))	C48H88NO8P	None	None	2979307	2.74672e+06	2.66239e+06	2.59578e+06	3912666	2.91398e+06	2.94318e+06	2.56156e+06	2.83035e+06	2.57708e+06	2.59746e+06	2.30418e+06	2862855	5342614	2.10575e+06	2.81136e+06	2.46599e+06	2.58727e+06	2.14291e+06	2.4296e+06	1.36362e+06	2.46795e+06	829662	923151	3.22636e+06	4007341	2.28625e+06	1.72167e+06	1.1049e+06	2.33734e+06	2.02397e+06	3.29343e+06	2015373	3.71249e+06	4654788	2.18066e+06	3.95155e+06	2.88202e+06	2.36412e+06	3.49809e+06	3.52031e+06	3.1296e+06	2.65841e+06	3.78365e+06
15634640	531	PC(18:2(9Z,12Z)/22:2(13Z,16Z))	C48H88NO8P	None	None	2979307	2.74672e+06	2.66239e+06	2.59578e+06	3912666	2.91398e+06	2.94318e+06	2.56156e+06	2.83035e+06	2.57708e+06	2.59746e+06	2.30418e+06	2862855	5342614	2.10575e+06	2.81136e+06	2.46599e+06	2.58727e+06	2.14291e+06	2.4296e+06	1.36362e+06	2.46795e+06	829662	923151	3.22636e+06	4007341	2.28625e+06	1.72167e+06	1.1049e+06	2.33734e+06	2.02397e+06	3.29343e+06	2015373	3.71249e+06	4654788	2.18066e+06	3.95155e+06	2.88202e+06	2.36412e+06	3.49809e+06	3.52031e+06	3.1296e+06	2.65841e+06	3.78365e+06
15634641	531	PC(18:3(6Z,9Z,12Z)/22:1(13Z))	C48H88NO8P	None	None	2979307	2.74672e+06	2.66239e+06	2.59578e+06	3912666	2.91398e+06	2.94318e+06	2.56156e+06	2.83035e+06	2.57708e+06	2.59746e+06	2.30418e+06	2862855	5342614	2.10575e+06	2.81136e+06	2.46599e+06	2.58727e+06	2.14291e+06	2.4296e+06	1.36362e+06	2.46795e+06	829662	923151	3.22636e+06	4007341	2.28625e+06	1.72167e+06	1.1049e+06	2.33734e+06	2.02397e+06	3.29343e+06	2015373	3.71249e+06	4654788	2.18066e+06	3.95155e+06	2.88202e+06	2.36412e+06	3.49809e+06	3.52031e+06	3.1296e+06	2.65841e+06	3.78365e+06
15634642	531	PC(18:3(9Z,12Z,15Z)/22:1(13Z))	C48H88NO8P	None	None	2979307	2.74672e+06	2.66239e+06	2.59578e+06	3912666	2.91398e+06	2.94318e+06	2.56156e+06	2.83035e+06	2.57708e+06	2.59746e+06	2.30418e+06	2862855	5342614	2.10575e+06	2.81136e+06	2.46599e+06	2.58727e+06	2.14291e+06	2.4296e+06	1.36362e+06	2.46795e+06	829662	923151	3.22636e+06	4007341	2.28625e+06	1.72167e+06	1.1049e+06	2.33734e+06	2.02397e+06	3.29343e+06	2015373	3.71249e+06	4654788	2.18066e+06	3.95155e+06	2.88202e+06	2.36412e+06	3.49809e+06	3.52031e+06	3.1296e+06	2.65841e+06	3.78365e+06
15634643	531	PC(18:4(6Z,9Z,12Z,15Z)/22:0)	C48H88NO8P	None	None	2979307	2.74672e+06	2.66239e+06	2.59578e+06	3912666	2.91398e+06	2.94318e+06	2.56156e+06	2.83035e+06	2.57708e+06	2.59746e+06	2.30418e+06	2862855	5342614	2.10575e+06	2.81136e+06	2.46599e+06	2.58727e+06	2.14291e+06	2.4296e+06	1.36362e+06	2.46795e+06	829662	923151	3.22636e+06	4007341	2.28625e+06	1.72167e+06	1.1049e+06	2.33734e+06	2.02397e+06	3.29343e+06	2015373	3.71249e+06	4654788	2.18066e+06	3.95155e+06	2.88202e+06	2.36412e+06	3.49809e+06	3.52031e+06	3.1296e+06	2.65841e+06	3.78365e+06
15634644	531	PC(20:0/20:4(8Z,11Z,14Z,17Z))	C48H88NO8P	None	None	2979307	2.74672e+06	2.66239e+06	2.59578e+06	3912666	2.91398e+06	2.94318e+06	2.56156e+06	2.83035e+06	2.57708e+06	2.59746e+06	2.30418e+06	2862855	5342614	2.10575e+06	2.81136e+06	2.46599e+06	2.58727e+06	2.14291e+06	2.4296e+06	1.36362e+06	2.46795e+06	829662	923151	3.22636e+06	4007341	2.28625e+06	1.72167e+06	1.1049e+06	2.33734e+06	2.02397e+06	3.29343e+06	2015373	3.71249e+06	4654788	2.18066e+06	3.95155e+06	2.88202e+06	2.36412e+06	3.49809e+06	3.52031e+06	3.1296e+06	2.65841e+06	3.78365e+06
15634645	531	PC(20:0/20:4(5Z,8Z,11Z,14Z))	C48H88NO8P	None	None	2979307	2.74672e+06	2.66239e+06	2.59578e+06	3912666	2.91398e+06	2.94318e+06	2.56156e+06	2.83035e+06	2.57708e+06	2.59746e+06	2.30418e+06	2862855	5342614	2.10575e+06	2.81136e+06	2.46599e+06	2.58727e+06	2.14291e+06	2.4296e+06	1.36362e+06	2.46795e+06	829662	923151	3.22636e+06	4007341	2.28625e+06	1.72167e+06	1.1049e+06	2.33734e+06	2.02397e+06	3.29343e+06	2015373	3.71249e+06	4654788	2.18066e+06	3.95155e+06	2.88202e+06	2.36412e+06	3.49809e+06	3.52031e+06	3.1296e+06	2.65841e+06	3.78365e+06
15634655	531	PC(22:1(11Z)/18:3(6Z,9Z,12Z))	C48H88NO8P	None	None	2979307	2.74672e+06	2.66239e+06	2.59578e+06	3912666	2.91398e+06	2.94318e+06	2.56156e+06	2.83035e+06	2.57708e+06	2.59746e+06	2.30418e+06	2862855	5342614	2.10575e+06	2.81136e+06	2.46599e+06	2.58727e+06	2.14291e+06	2.4296e+06	1.36362e+06	2.46795e+06	829662	923151	3.22636e+06	4007341	2.28625e+06	1.72167e+06	1.1049e+06	2.33734e+06	2.02397e+06	3.29343e+06	2015373	3.71249e+06	4654788	2.18066e+06	3.95155e+06	2.88202e+06	2.36412e+06	3.49809e+06	3.52031e+06	3.1296e+06	2.65841e+06	3.78365e+06
15634656	531	PC(22:1(11Z)/18:3(9Z,12Z,15Z))	C48H88NO8P	None	None	2979307	2.74672e+06	2.66239e+06	2.59578e+06	3912666	2.91398e+06	2.94318e+06	2.56156e+06	2.83035e+06	2.57708e+06	2.59746e+06	2.30418e+06	2862855	5342614	2.10575e+06	2.81136e+06	2.46599e+06	2.58727e+06	2.14291e+06	2.4296e+06	1.36362e+06	2.46795e+06	829662	923151	3.22636e+06	4007341	2.28625e+06	1.72167e+06	1.1049e+06	2.33734e+06	2.02397e+06	3.29343e+06	2015373	3.71249e+06	4654788	2.18066e+06	3.95155e+06	2.88202e+06	2.36412e+06	3.49809e+06	3.52031e+06	3.1296e+06	2.65841e+06	3.78365e+06
15634658	531	PE(22:4(7Z,10Z,13Z,16Z)/21:0)	C48H88NO8P	None	None	2979307	2.74672e+06	2.66239e+06	2.59578e+06	3912666	2.91398e+06	2.94318e+06	2.56156e+06	2.83035e+06	2.57708e+06	2.59746e+06	2.30418e+06	2862855	5342614	2.10575e+06	2.81136e+06	2.46599e+06	2.58727e+06	2.14291e+06	2.4296e+06	1.36362e+06	2.46795e+06	829662	923151	3.22636e+06	4007341	2.28625e+06	1.72167e+06	1.1049e+06	2.33734e+06	2.02397e+06	3.29343e+06	2015373	3.71249e+06	4654788	2.18066e+06	3.95155e+06	2.88202e+06	2.36412e+06	3.49809e+06	3.52031e+06	3.1296e+06	2.65841e+06	3.78365e+06
15634660	531	PE(21:0/22:4(7Z,10Z,13Z,16Z))	C48H88NO8P	None	None	2979307	2.74672e+06	2.66239e+06	2.59578e+06	3912666	2.91398e+06	2.94318e+06	2.56156e+06	2.83035e+06	2.57708e+06	2.59746e+06	2.30418e+06	2862855	5342614	2.10575e+06	2.81136e+06	2.46599e+06	2.58727e+06	2.14291e+06	2.4296e+06	1.36362e+06	2.46795e+06	829662	923151	3.22636e+06	4007341	2.28625e+06	1.72167e+06	1.1049e+06	2.33734e+06	2.02397e+06	3.29343e+06	2015373	3.71249e+06	4654788	2.18066e+06	3.95155e+06	2.88202e+06	2.36412e+06	3.49809e+06	3.52031e+06	3.1296e+06	2.65841e+06	3.78365e+06
15634672	531	PC(20:2(11E,14E)/20:2(11E,14E))	C48H88NO8P	None	None	2979307	2.74672e+06	2.66239e+06	2.59578e+06	3912666	2.91398e+06	2.94318e+06	2.56156e+06	2.83035e+06	2.57708e+06	2.59746e+06	2.30418e+06	2862855	5342614	2.10575e+06	2.81136e+06	2.46599e+06	2.58727e+06	2.14291e+06	2.4296e+06	1.36362e+06	2.46795e+06	829662	923151	3.22636e+06	4007341	2.28625e+06	1.72167e+06	1.1049e+06	2.33734e+06	2.02397e+06	3.29343e+06	2015373	3.71249e+06	4654788	2.18066e+06	3.95155e+06	2.88202e+06	2.36412e+06	3.49809e+06	3.52031e+06	3.1296e+06	2.65841e+06	3.78365e+06
15634676	531	PC(18:3(9Z,12Z,15Z)/22:1(11Z))	C48H88NO8P	None	None	2979307	2.74672e+06	2.66239e+06	2.59578e+06	3912666	2.91398e+06	2.94318e+06	2.56156e+06	2.83035e+06	2.57708e+06	2.59746e+06	2.30418e+06	2862855	5342614	2.10575e+06	2.81136e+06	2.46599e+06	2.58727e+06	2.14291e+06	2.4296e+06	1.36362e+06	2.46795e+06	829662	923151	3.22636e+06	4007341	2.28625e+06	1.72167e+06	1.1049e+06	2.33734e+06	2.02397e+06	3.29343e+06	2015373	3.71249e+06	4654788	2.18066e+06	3.95155e+06	2.88202e+06	2.36412e+06	3.49809e+06	3.52031e+06	3.1296e+06	2.65841e+06	3.78365e+06
15634677	531	PC(18:3(6Z,9Z,12Z)/22:1(11Z))	C48H88NO8P	None	None	2979307	2.74672e+06	2.66239e+06	2.59578e+06	3912666	2.91398e+06	2.94318e+06	2.56156e+06	2.83035e+06	2.57708e+06	2.59746e+06	2.30418e+06	2862855	5342614	2.10575e+06	2.81136e+06	2.46599e+06	2.58727e+06	2.14291e+06	2.4296e+06	1.36362e+06	2.46795e+06	829662	923151	3.22636e+06	4007341	2.28625e+06	1.72167e+06	1.1049e+06	2.33734e+06	2.02397e+06	3.29343e+06	2015373	3.71249e+06	4654788	2.18066e+06	3.95155e+06	2.88202e+06	2.36412e+06	3.49809e+06	3.52031e+06	3.1296e+06	2.65841e+06	3.78365e+06
15634724	534	Guanidinoacetate	C3H7N3O2	Metabolism; Amino acid metabolism Metabolism; Amino acid metabolism	Glycine, serine and threonine metabolism Arginine and proline metabolism	3067563	3014652	3.09176e+06	3.25233e+06	3.10034e+06	2.93671e+06	3.55835e+06	3.42288e+06	3.09605e+06	3.03043e+06	3.33904e+06	2.20002e+06	3.76389e+06	2.98211e+06	3.36176e+06	3.59425e+06	3146977	3.24301e+06	1.91154e+06	3674505	3.67794e+06	4830913	3.44841e+06	2.29453e+06	4.76313e+06	2.83787e+06	3.56146e+06	2.39474e+06	3347530	2861045	3.06155e+06	3.4825e+06	1.78764e+06	2.91327e+06	2.88699e+06	2.90013e+06	2268764	1.89452e+06	2.76838e+06	3.01378e+06	1.93638e+06	1.70231e+06	3640728	1856008
15634726	534	N-Nitroso-N-ethylurea	C3H7N3O2	None	None	3067563	3014652	3.09176e+06	3.25233e+06	3.10034e+06	2.93671e+06	3.55835e+06	3.42288e+06	3.09605e+06	3.03043e+06	3.33904e+06	2.20002e+06	3.76389e+06	2.98211e+06	3.36176e+06	3.59425e+06	3146977	3.24301e+06	1.91154e+06	3674505	3.67794e+06	4830913	3.44841e+06	2.29453e+06	4.76313e+06	2.83787e+06	3.56146e+06	2.39474e+06	3347530	2861045	3.06155e+06	3.4825e+06	1.78764e+06	2.91327e+06	2.88699e+06	2.90013e+06	2268764	1.89452e+06	2.76838e+06	3.01378e+06	1.93638e+06	1.70231e+06	3640728	1856008
15634765	537	Lysyl-Valine	C11H23N3O3	None	None	21879.2	15890.5	22112.4	17561.6	18797.7	20946.2	17452	17709.8	18253.7	24656.6	19371.7	19470.6	17958.2	20111.8	22124	15284.8	20010.4	19740.5	20897.6	19571.9	15571.5	28804	36756.2	37933.5	17465.6	29674	24850.8	19501.7	25733.3	17173	21327.7	24566.7	15138.2	16251.9	28018	20414.7	26156.9	25425.9	21563.7	18600.2	26640.5	19326.9	21389.3	23170.3
15634766	537	Valyl-Lysine	C11H23N3O3	None	None	21879.2	15890.5	22112.4	17561.6	18797.7	20946.2	17452	17709.8	18253.7	24656.6	19371.7	19470.6	17958.2	20111.8	22124	15284.8	20010.4	19740.5	20897.6	19571.9	15571.5	28804	36756.2	37933.5	17465.6	29674	24850.8	19501.7	25733.3	17173	21327.7	24566.7	15138.2	16251.9	28018	20414.7	26156.9	25425.9	21563.7	18600.2	26640.5	19326.9	21389.3	23170.3
15634805	542	Hexaethylene glycol	C12H26O7	None	None	26187	14276.8	65487.5	50298.2	45894.7	50628.9	20673.6	25589.2	36040.8	25597.7	48172.9	14901.2	31769.6	17353.5	24250.8	28273.1	28332.3	26935.4	54976.3	29183.4	21925.8	13293.5	26432.3	53979.6	25865.6	39549.1	27807.8	33191.4	56724.7	79785.9	24479.3	166150	24174.3	6014.19	31932.2	32561.8	67606.4	15636.9	54227.4	51153	41808.5	224661	122245	14927.8
15634806	543	L-Ornithine	C5H12N2O2	Environmental Information Processing; Membrane transport Metabolism; Metabolism of other amino acids Metabolism; Amino acid metabolism Metabolism; Metabolism of other amino acids	ABC transporters Glutathione metabolism Arginine and proline metabolism D-Arginine and D-ornithine metabolism	2.65069e+06	3.02273e+06	2.26656e+06	3.73723e+06	3.36867e+06	2187921	3.15855e+06	2297625	2.83671e+06	2.98034e+06	2.6257e+06	2.12422e+06	4.01213e+06	3667581	3051866	3504902	2.39026e+06	3.0161e+06	3.17783e+06	3314303	2.50091e+06	4702146	1.49046e+06	1.9127e+06	3.3548e+06	2.40524e+06	2.83937e+06	2045229	2468055	2.36651e+06	2.76408e+06	3.83785e+06	1.92412e+06	2570675	2.46188e+06	2.46497e+06	2.85808e+06	4080669	2.53318e+06	3.19013e+06	2.77347e+06	1.95069e+06	2.07279e+06	1.68176e+06
15634807	543	D-Ornithine	C5H12N2O2	Metabolism; Metabolism of other amino acids	D-Arginine and D-ornithine metabolism	2.65069e+06	3.02273e+06	2.26656e+06	3.73723e+06	3.36867e+06	2187921	3.15855e+06	2297625	2.83671e+06	2.98034e+06	2.6257e+06	2.12422e+06	4.01213e+06	3667581	3051866	3504902	2.39026e+06	3.0161e+06	3.17783e+06	3314303	2.50091e+06	4702146	1.49046e+06	1.9127e+06	3.3548e+06	2.40524e+06	2.83937e+06	2045229	2468055	2.36651e+06	2.76408e+06	3.83785e+06	1.92412e+06	2570675	2.46188e+06	2.46497e+06	2.85808e+06	4080669	2.53318e+06	3.19013e+06	2.77347e+06	1.95069e+06	2.07279e+06	1.68176e+06
15634808	543	L-Ornithine monochlorohydrate/ornithine	C5H12N2O2	None	None	2.65069e+06	3.02273e+06	2.26656e+06	3.73723e+06	3.36867e+06	2187921	3.15855e+06	2297625	2.83671e+06	2.98034e+06	2.6257e+06	2.12422e+06	4.01213e+06	3667581	3051866	3504902	2.39026e+06	3.0161e+06	3.17783e+06	3314303	2.50091e+06	4702146	1.49046e+06	1.9127e+06	3.3548e+06	2.40524e+06	2.83937e+06	2045229	2468055	2.36651e+06	2.76408e+06	3.83785e+06	1.92412e+06	2570675	2.46188e+06	2.46497e+06	2.85808e+06	4080669	2.53318e+06	3.19013e+06	2.77347e+06	1.95069e+06	2.07279e+06	1.68176e+06
15634810	543	(2R,4S)-2,4-Diaminopentanoate	C5H12N2O2	Metabolism; Metabolism of other amino acids	D-Arginine and D-ornithine metabolism	2.65069e+06	3.02273e+06	2.26656e+06	3.73723e+06	3.36867e+06	2187921	3.15855e+06	2297625	2.83671e+06	2.98034e+06	2.6257e+06	2.12422e+06	4.01213e+06	3667581	3051866	3504902	2.39026e+06	3.0161e+06	3.17783e+06	3314303	2.50091e+06	4702146	1.49046e+06	1.9127e+06	3.3548e+06	2.40524e+06	2.83937e+06	2045229	2468055	2.36651e+06	2.76408e+06	3.83785e+06	1.92412e+06	2570675	2.46188e+06	2.46497e+06	2.85808e+06	4080669	2.53318e+06	3.19013e+06	2.77347e+06	1.95069e+06	2.07279e+06	1.68176e+06
15634820	551	Chrycolide	C12H8O3S	None	None	37676	37954.4	32452.5	42608.5	50276.9	27590.2	40553.7	25086.3	37815.2	46698.9	49131.5	25022.3	47464.7	46601	41749.4	44708.9	27219	45655	41752.2	46139	40025.9	55616.9	25406.4	24165.8	52721.9	33197.4	40889.1	23486.3	37926.8	34449.5	37968.1	56956.1	21959.9	29895.1	34935.9	34692.7	39574.6	61367.3	25891.5	39142	34602.3	26717.6	20871.4	25259.7
15634863	559	N-Undecanoylglycine	C13H25NO3	None	None	839997	722669	2.02863e+06	1.15913e+06	1267813	2.06022e+06	3.98708e+06	4.29636e+06	1.64822e+06	1.73307e+06	2.8278e+06	974451	2.68631e+06	1.62965e+06	3.39456e+06	3.53139e+06	2.53762e+06	2.61197e+06	1.68697e+06	2.05228e+06	868864	1.43368e+06	1.5914e+06	1.53722e+06	4.67044e+06	2.34149e+06	1.63918e+06	1.45226e+06	2299181	2362997	1.76359e+06	1.5318e+06	1.47792e+06	838059	925577	1.50486e+06	2.62637e+06	629756	974318	1.08759e+06	985782	1.54431e+06	1.09317e+06	485351
15634880	560	PC(20:2(11Z,14Z)/14:1(9Z))	C42H78NO8P	None	None	2.47514e+06	2.54681e+06	3003003	2.44109e+06	1.57812e+06	1645079	1.7881e+06	959677	2.11459e+06	2.56624e+06	3.32044e+06	2.79648e+06	2.42241e+06	3.01843e+06	1.28566e+06	1892953	904199	2.49433e+06	1.03953e+06	1.36732e+06	1.23429e+06	1.73106e+06	1.1542e+06	1.63655e+06	2.27911e+06	3.48349e+06	1.50194e+06	2.06981e+06	759636	1.65418e+06	1.72619e+06	2.88679e+06	1.789e+06	2.08979e+06	2.8643e+06	1929409	3.40442e+06	3297942	3.10132e+06	2.55636e+06	3.12724e+06	2.75434e+06	3.52987e+06	3908393
15634881	560	PC(20:3(5Z,8Z,11Z)/14:0)	C42H78NO8P	None	None	2.47514e+06	2.54681e+06	3003003	2.44109e+06	1.57812e+06	1645079	1.7881e+06	959677	2.11459e+06	2.56624e+06	3.32044e+06	2.79648e+06	2.42241e+06	3.01843e+06	1.28566e+06	1892953	904199	2.49433e+06	1.03953e+06	1.36732e+06	1.23429e+06	1.73106e+06	1.1542e+06	1.63655e+06	2.27911e+06	3.48349e+06	1.50194e+06	2.06981e+06	759636	1.65418e+06	1.72619e+06	2.88679e+06	1.789e+06	2.08979e+06	2.8643e+06	1929409	3.40442e+06	3297942	3.10132e+06	2.55636e+06	3.12724e+06	2.75434e+06	3.52987e+06	3908393
15634882	560	PC(20:3(8Z,11Z,14Z)/14:0)	C42H78NO8P	None	None	2.47514e+06	2.54681e+06	3003003	2.44109e+06	1.57812e+06	1645079	1.7881e+06	959677	2.11459e+06	2.56624e+06	3.32044e+06	2.79648e+06	2.42241e+06	3.01843e+06	1.28566e+06	1892953	904199	2.49433e+06	1.03953e+06	1.36732e+06	1.23429e+06	1.73106e+06	1.1542e+06	1.63655e+06	2.27911e+06	3.48349e+06	1.50194e+06	2.06981e+06	759636	1.65418e+06	1.72619e+06	2.88679e+06	1.789e+06	2.08979e+06	2.8643e+06	1929409	3.40442e+06	3297942	3.10132e+06	2.55636e+06	3.12724e+06	2.75434e+06	3.52987e+06	3908393
15634883	560	PC(16:1(9Z)/18:2(9Z,12Z))	C42H78NO8P	None	None	2.47514e+06	2.54681e+06	3003003	2.44109e+06	1.57812e+06	1645079	1.7881e+06	959677	2.11459e+06	2.56624e+06	3.32044e+06	2.79648e+06	2.42241e+06	3.01843e+06	1.28566e+06	1892953	904199	2.49433e+06	1.03953e+06	1.36732e+06	1.23429e+06	1.73106e+06	1.1542e+06	1.63655e+06	2.27911e+06	3.48349e+06	1.50194e+06	2.06981e+06	759636	1.65418e+06	1.72619e+06	2.88679e+06	1.789e+06	2.08979e+06	2.8643e+06	1929409	3.40442e+06	3297942	3.10132e+06	2.55636e+06	3.12724e+06	2.75434e+06	3.52987e+06	3908393
15634885	560	PC(18:2(9Z,12Z)/16:1(9Z))	C42H78NO8P	None	None	2.47514e+06	2.54681e+06	3003003	2.44109e+06	1.57812e+06	1645079	1.7881e+06	959677	2.11459e+06	2.56624e+06	3.32044e+06	2.79648e+06	2.42241e+06	3.01843e+06	1.28566e+06	1892953	904199	2.49433e+06	1.03953e+06	1.36732e+06	1.23429e+06	1.73106e+06	1.1542e+06	1.63655e+06	2.27911e+06	3.48349e+06	1.50194e+06	2.06981e+06	759636	1.65418e+06	1.72619e+06	2.88679e+06	1.789e+06	2.08979e+06	2.8643e+06	1929409	3.40442e+06	3297942	3.10132e+06	2.55636e+06	3.12724e+06	2.75434e+06	3.52987e+06	3908393
15634886	560	PC(18:3(6Z,9Z,12Z)/16:0)	C42H78NO8P	None	None	2.47514e+06	2.54681e+06	3003003	2.44109e+06	1.57812e+06	1645079	1.7881e+06	959677	2.11459e+06	2.56624e+06	3.32044e+06	2.79648e+06	2.42241e+06	3.01843e+06	1.28566e+06	1892953	904199	2.49433e+06	1.03953e+06	1.36732e+06	1.23429e+06	1.73106e+06	1.1542e+06	1.63655e+06	2.27911e+06	3.48349e+06	1.50194e+06	2.06981e+06	759636	1.65418e+06	1.72619e+06	2.88679e+06	1.789e+06	2.08979e+06	2.8643e+06	1929409	3.40442e+06	3297942	3.10132e+06	2.55636e+06	3.12724e+06	2.75434e+06	3.52987e+06	3908393
15634887	560	PC(18:3(9Z,12Z,15Z)/16:0)	C42H78NO8P	None	None	2.47514e+06	2.54681e+06	3003003	2.44109e+06	1.57812e+06	1645079	1.7881e+06	959677	2.11459e+06	2.56624e+06	3.32044e+06	2.79648e+06	2.42241e+06	3.01843e+06	1.28566e+06	1892953	904199	2.49433e+06	1.03953e+06	1.36732e+06	1.23429e+06	1.73106e+06	1.1542e+06	1.63655e+06	2.27911e+06	3.48349e+06	1.50194e+06	2.06981e+06	759636	1.65418e+06	1.72619e+06	2.88679e+06	1.789e+06	2.08979e+06	2.8643e+06	1929409	3.40442e+06	3297942	3.10132e+06	2.55636e+06	3.12724e+06	2.75434e+06	3.52987e+06	3908393
15634888	560	PC(14:1(9Z)/20:2(11Z,14Z))	C42H78NO8P	None	None	2.47514e+06	2.54681e+06	3003003	2.44109e+06	1.57812e+06	1645079	1.7881e+06	959677	2.11459e+06	2.56624e+06	3.32044e+06	2.79648e+06	2.42241e+06	3.01843e+06	1.28566e+06	1892953	904199	2.49433e+06	1.03953e+06	1.36732e+06	1.23429e+06	1.73106e+06	1.1542e+06	1.63655e+06	2.27911e+06	3.48349e+06	1.50194e+06	2.06981e+06	759636	1.65418e+06	1.72619e+06	2.88679e+06	1.789e+06	2.08979e+06	2.8643e+06	1929409	3.40442e+06	3297942	3.10132e+06	2.55636e+06	3.12724e+06	2.75434e+06	3.52987e+06	3908393
15634889	560	PC(16:0/18:3(9Z,12Z,15Z))	C42H78NO8P	None	None	2.47514e+06	2.54681e+06	3003003	2.44109e+06	1.57812e+06	1645079	1.7881e+06	959677	2.11459e+06	2.56624e+06	3.32044e+06	2.79648e+06	2.42241e+06	3.01843e+06	1.28566e+06	1892953	904199	2.49433e+06	1.03953e+06	1.36732e+06	1.23429e+06	1.73106e+06	1.1542e+06	1.63655e+06	2.27911e+06	3.48349e+06	1.50194e+06	2.06981e+06	759636	1.65418e+06	1.72619e+06	2.88679e+06	1.789e+06	2.08979e+06	2.8643e+06	1929409	3.40442e+06	3297942	3.10132e+06	2.55636e+06	3.12724e+06	2.75434e+06	3.52987e+06	3908393
15634890	560	PC(16:0/18:3(6Z,9Z,12Z))	C42H78NO8P	None	None	2.47514e+06	2.54681e+06	3003003	2.44109e+06	1.57812e+06	1645079	1.7881e+06	959677	2.11459e+06	2.56624e+06	3.32044e+06	2.79648e+06	2.42241e+06	3.01843e+06	1.28566e+06	1892953	904199	2.49433e+06	1.03953e+06	1.36732e+06	1.23429e+06	1.73106e+06	1.1542e+06	1.63655e+06	2.27911e+06	3.48349e+06	1.50194e+06	2.06981e+06	759636	1.65418e+06	1.72619e+06	2.88679e+06	1.789e+06	2.08979e+06	2.8643e+06	1929409	3.40442e+06	3297942	3.10132e+06	2.55636e+06	3.12724e+06	2.75434e+06	3.52987e+06	3908393
15634904	560	PC(14:0/20:3(8Z,11Z,14Z))	C42H78NO8P	None	None	2.47514e+06	2.54681e+06	3003003	2.44109e+06	1.57812e+06	1645079	1.7881e+06	959677	2.11459e+06	2.56624e+06	3.32044e+06	2.79648e+06	2.42241e+06	3.01843e+06	1.28566e+06	1892953	904199	2.49433e+06	1.03953e+06	1.36732e+06	1.23429e+06	1.73106e+06	1.1542e+06	1.63655e+06	2.27911e+06	3.48349e+06	1.50194e+06	2.06981e+06	759636	1.65418e+06	1.72619e+06	2.88679e+06	1.789e+06	2.08979e+06	2.8643e+06	1929409	3.40442e+06	3297942	3.10132e+06	2.55636e+06	3.12724e+06	2.75434e+06	3.52987e+06	3908393
15634905	560	PC(14:0/20:3(5Z,8Z,11Z))	C42H78NO8P	None	None	2.47514e+06	2.54681e+06	3003003	2.44109e+06	1.57812e+06	1645079	1.7881e+06	959677	2.11459e+06	2.56624e+06	3.32044e+06	2.79648e+06	2.42241e+06	3.01843e+06	1.28566e+06	1892953	904199	2.49433e+06	1.03953e+06	1.36732e+06	1.23429e+06	1.73106e+06	1.1542e+06	1.63655e+06	2.27911e+06	3.48349e+06	1.50194e+06	2.06981e+06	759636	1.65418e+06	1.72619e+06	2.88679e+06	1.789e+06	2.08979e+06	2.8643e+06	1929409	3.40442e+06	3297942	3.10132e+06	2.55636e+06	3.12724e+06	2.75434e+06	3.52987e+06	3908393
15634925	560	PE(22:2(13Z,16Z)/15:1(9Z))	C42H78NO8P	None	None	2.47514e+06	2.54681e+06	3003003	2.44109e+06	1.57812e+06	1645079	1.7881e+06	959677	2.11459e+06	2.56624e+06	3.32044e+06	2.79648e+06	2.42241e+06	3.01843e+06	1.28566e+06	1892953	904199	2.49433e+06	1.03953e+06	1.36732e+06	1.23429e+06	1.73106e+06	1.1542e+06	1.63655e+06	2.27911e+06	3.48349e+06	1.50194e+06	2.06981e+06	759636	1.65418e+06	1.72619e+06	2.88679e+06	1.789e+06	2.08979e+06	2.8643e+06	1929409	3.40442e+06	3297942	3.10132e+06	2.55636e+06	3.12724e+06	2.75434e+06	3.52987e+06	3908393
15634935	560	PC(17:1(9Z)/17:2(9Z,12Z))	C42H78NO8P	None	None	2.47514e+06	2.54681e+06	3003003	2.44109e+06	1.57812e+06	1645079	1.7881e+06	959677	2.11459e+06	2.56624e+06	3.32044e+06	2.79648e+06	2.42241e+06	3.01843e+06	1.28566e+06	1892953	904199	2.49433e+06	1.03953e+06	1.36732e+06	1.23429e+06	1.73106e+06	1.1542e+06	1.63655e+06	2.27911e+06	3.48349e+06	1.50194e+06	2.06981e+06	759636	1.65418e+06	1.72619e+06	2.88679e+06	1.789e+06	2.08979e+06	2.8643e+06	1929409	3.40442e+06	3297942	3.10132e+06	2.55636e+06	3.12724e+06	2.75434e+06	3.52987e+06	3908393
15634936	560	PC(17:2(9Z,12Z)/17:1(9Z))	C42H78NO8P	None	None	2.47514e+06	2.54681e+06	3003003	2.44109e+06	1.57812e+06	1645079	1.7881e+06	959677	2.11459e+06	2.56624e+06	3.32044e+06	2.79648e+06	2.42241e+06	3.01843e+06	1.28566e+06	1892953	904199	2.49433e+06	1.03953e+06	1.36732e+06	1.23429e+06	1.73106e+06	1.1542e+06	1.63655e+06	2.27911e+06	3.48349e+06	1.50194e+06	2.06981e+06	759636	1.65418e+06	1.72619e+06	2.88679e+06	1.789e+06	2.08979e+06	2.8643e+06	1929409	3.40442e+06	3297942	3.10132e+06	2.55636e+06	3.12724e+06	2.75434e+06	3.52987e+06	3908393
15634942	560	PE(18:2(9Z,12Z)/19:1(9Z))	C42H78NO8P	None	None	2.47514e+06	2.54681e+06	3003003	2.44109e+06	1.57812e+06	1645079	1.7881e+06	959677	2.11459e+06	2.56624e+06	3.32044e+06	2.79648e+06	2.42241e+06	3.01843e+06	1.28566e+06	1892953	904199	2.49433e+06	1.03953e+06	1.36732e+06	1.23429e+06	1.73106e+06	1.1542e+06	1.63655e+06	2.27911e+06	3.48349e+06	1.50194e+06	2.06981e+06	759636	1.65418e+06	1.72619e+06	2.88679e+06	1.789e+06	2.08979e+06	2.8643e+06	1929409	3.40442e+06	3297942	3.10132e+06	2.55636e+06	3.12724e+06	2.75434e+06	3.52987e+06	3908393
15634943	560	PE(18:3(6Z,9Z,12Z)/19:0)	C42H78NO8P	None	None	2.47514e+06	2.54681e+06	3003003	2.44109e+06	1.57812e+06	1645079	1.7881e+06	959677	2.11459e+06	2.56624e+06	3.32044e+06	2.79648e+06	2.42241e+06	3.01843e+06	1.28566e+06	1892953	904199	2.49433e+06	1.03953e+06	1.36732e+06	1.23429e+06	1.73106e+06	1.1542e+06	1.63655e+06	2.27911e+06	3.48349e+06	1.50194e+06	2.06981e+06	759636	1.65418e+06	1.72619e+06	2.88679e+06	1.789e+06	2.08979e+06	2.8643e+06	1929409	3.40442e+06	3297942	3.10132e+06	2.55636e+06	3.12724e+06	2.75434e+06	3.52987e+06	3908393
15634945	560	PE(17:2(9Z,12Z)/20:1(11Z))	C42H78NO8P	None	None	2.47514e+06	2.54681e+06	3003003	2.44109e+06	1.57812e+06	1645079	1.7881e+06	959677	2.11459e+06	2.56624e+06	3.32044e+06	2.79648e+06	2.42241e+06	3.01843e+06	1.28566e+06	1892953	904199	2.49433e+06	1.03953e+06	1.36732e+06	1.23429e+06	1.73106e+06	1.1542e+06	1.63655e+06	2.27911e+06	3.48349e+06	1.50194e+06	2.06981e+06	759636	1.65418e+06	1.72619e+06	2.88679e+06	1.789e+06	2.08979e+06	2.8643e+06	1929409	3.40442e+06	3297942	3.10132e+06	2.55636e+06	3.12724e+06	2.75434e+06	3.52987e+06	3908393
15634946	560	PE(19:0/18:3(9Z,12Z,15Z))	C42H78NO8P	None	None	2.47514e+06	2.54681e+06	3003003	2.44109e+06	1.57812e+06	1645079	1.7881e+06	959677	2.11459e+06	2.56624e+06	3.32044e+06	2.79648e+06	2.42241e+06	3.01843e+06	1.28566e+06	1892953	904199	2.49433e+06	1.03953e+06	1.36732e+06	1.23429e+06	1.73106e+06	1.1542e+06	1.63655e+06	2.27911e+06	3.48349e+06	1.50194e+06	2.06981e+06	759636	1.65418e+06	1.72619e+06	2.88679e+06	1.789e+06	2.08979e+06	2.8643e+06	1929409	3.40442e+06	3297942	3.10132e+06	2.55636e+06	3.12724e+06	2.75434e+06	3.52987e+06	3908393
15634947	560	PE(19:0/18:3(6Z,9Z,12Z))	C42H78NO8P	None	None	2.47514e+06	2.54681e+06	3003003	2.44109e+06	1.57812e+06	1645079	1.7881e+06	959677	2.11459e+06	2.56624e+06	3.32044e+06	2.79648e+06	2.42241e+06	3.01843e+06	1.28566e+06	1892953	904199	2.49433e+06	1.03953e+06	1.36732e+06	1.23429e+06	1.73106e+06	1.1542e+06	1.63655e+06	2.27911e+06	3.48349e+06	1.50194e+06	2.06981e+06	759636	1.65418e+06	1.72619e+06	2.88679e+06	1.789e+06	2.08979e+06	2.8643e+06	1929409	3.40442e+06	3297942	3.10132e+06	2.55636e+06	3.12724e+06	2.75434e+06	3.52987e+06	3908393
15634948	560	PE(18:3(9Z,12Z,15Z)/19:0)	C42H78NO8P	None	None	2.47514e+06	2.54681e+06	3003003	2.44109e+06	1.57812e+06	1645079	1.7881e+06	959677	2.11459e+06	2.56624e+06	3.32044e+06	2.79648e+06	2.42241e+06	3.01843e+06	1.28566e+06	1892953	904199	2.49433e+06	1.03953e+06	1.36732e+06	1.23429e+06	1.73106e+06	1.1542e+06	1.63655e+06	2.27911e+06	3.48349e+06	1.50194e+06	2.06981e+06	759636	1.65418e+06	1.72619e+06	2.88679e+06	1.789e+06	2.08979e+06	2.8643e+06	1929409	3.40442e+06	3297942	3.10132e+06	2.55636e+06	3.12724e+06	2.75434e+06	3.52987e+06	3908393
15634951	560	PE(17:0/20:3(8Z,11Z,14Z))	C42H78NO8P	None	None	2.47514e+06	2.54681e+06	3003003	2.44109e+06	1.57812e+06	1645079	1.7881e+06	959677	2.11459e+06	2.56624e+06	3.32044e+06	2.79648e+06	2.42241e+06	3.01843e+06	1.28566e+06	1892953	904199	2.49433e+06	1.03953e+06	1.36732e+06	1.23429e+06	1.73106e+06	1.1542e+06	1.63655e+06	2.27911e+06	3.48349e+06	1.50194e+06	2.06981e+06	759636	1.65418e+06	1.72619e+06	2.88679e+06	1.789e+06	2.08979e+06	2.8643e+06	1929409	3.40442e+06	3297942	3.10132e+06	2.55636e+06	3.12724e+06	2.75434e+06	3.52987e+06	3908393
15634952	560	PE(17:1(9Z)/20:2(11Z,14Z))	C42H78NO8P	None	None	2.47514e+06	2.54681e+06	3003003	2.44109e+06	1.57812e+06	1645079	1.7881e+06	959677	2.11459e+06	2.56624e+06	3.32044e+06	2.79648e+06	2.42241e+06	3.01843e+06	1.28566e+06	1892953	904199	2.49433e+06	1.03953e+06	1.36732e+06	1.23429e+06	1.73106e+06	1.1542e+06	1.63655e+06	2.27911e+06	3.48349e+06	1.50194e+06	2.06981e+06	759636	1.65418e+06	1.72619e+06	2.88679e+06	1.789e+06	2.08979e+06	2.8643e+06	1929409	3.40442e+06	3297942	3.10132e+06	2.55636e+06	3.12724e+06	2.75434e+06	3.52987e+06	3908393
15634953	560	PE(15:1(9Z)/22:2(13Z,16Z))	C42H78NO8P	None	None	2.47514e+06	2.54681e+06	3003003	2.44109e+06	1.57812e+06	1645079	1.7881e+06	959677	2.11459e+06	2.56624e+06	3.32044e+06	2.79648e+06	2.42241e+06	3.01843e+06	1.28566e+06	1892953	904199	2.49433e+06	1.03953e+06	1.36732e+06	1.23429e+06	1.73106e+06	1.1542e+06	1.63655e+06	2.27911e+06	3.48349e+06	1.50194e+06	2.06981e+06	759636	1.65418e+06	1.72619e+06	2.88679e+06	1.789e+06	2.08979e+06	2.8643e+06	1929409	3.40442e+06	3297942	3.10132e+06	2.55636e+06	3.12724e+06	2.75434e+06	3.52987e+06	3908393
15634954	560	PE(20:2(11Z,14Z)/17:1(9Z))	C42H78NO8P	None	None	2.47514e+06	2.54681e+06	3003003	2.44109e+06	1.57812e+06	1645079	1.7881e+06	959677	2.11459e+06	2.56624e+06	3.32044e+06	2.79648e+06	2.42241e+06	3.01843e+06	1.28566e+06	1892953	904199	2.49433e+06	1.03953e+06	1.36732e+06	1.23429e+06	1.73106e+06	1.1542e+06	1.63655e+06	2.27911e+06	3.48349e+06	1.50194e+06	2.06981e+06	759636	1.65418e+06	1.72619e+06	2.88679e+06	1.789e+06	2.08979e+06	2.8643e+06	1929409	3.40442e+06	3297942	3.10132e+06	2.55636e+06	3.12724e+06	2.75434e+06	3.52987e+06	3908393
15634956	560	PE(19:1(9Z)/18:2(9Z,12Z))	C42H78NO8P	None	None	2.47514e+06	2.54681e+06	3003003	2.44109e+06	1.57812e+06	1645079	1.7881e+06	959677	2.11459e+06	2.56624e+06	3.32044e+06	2.79648e+06	2.42241e+06	3.01843e+06	1.28566e+06	1892953	904199	2.49433e+06	1.03953e+06	1.36732e+06	1.23429e+06	1.73106e+06	1.1542e+06	1.63655e+06	2.27911e+06	3.48349e+06	1.50194e+06	2.06981e+06	759636	1.65418e+06	1.72619e+06	2.88679e+06	1.789e+06	2.08979e+06	2.8643e+06	1929409	3.40442e+06	3297942	3.10132e+06	2.55636e+06	3.12724e+06	2.75434e+06	3.52987e+06	3908393
15634957	560	PE(20:1(11Z)/17:2(9Z,12Z))	C42H78NO8P	None	None	2.47514e+06	2.54681e+06	3003003	2.44109e+06	1.57812e+06	1645079	1.7881e+06	959677	2.11459e+06	2.56624e+06	3.32044e+06	2.79648e+06	2.42241e+06	3.01843e+06	1.28566e+06	1892953	904199	2.49433e+06	1.03953e+06	1.36732e+06	1.23429e+06	1.73106e+06	1.1542e+06	1.63655e+06	2.27911e+06	3.48349e+06	1.50194e+06	2.06981e+06	759636	1.65418e+06	1.72619e+06	2.88679e+06	1.789e+06	2.08979e+06	2.8643e+06	1929409	3.40442e+06	3297942	3.10132e+06	2.55636e+06	3.12724e+06	2.75434e+06	3.52987e+06	3908393
15634958	560	PE(20:3(8Z,11Z,14Z)/17:0)	C42H78NO8P	None	None	2.47514e+06	2.54681e+06	3003003	2.44109e+06	1.57812e+06	1645079	1.7881e+06	959677	2.11459e+06	2.56624e+06	3.32044e+06	2.79648e+06	2.42241e+06	3.01843e+06	1.28566e+06	1892953	904199	2.49433e+06	1.03953e+06	1.36732e+06	1.23429e+06	1.73106e+06	1.1542e+06	1.63655e+06	2.27911e+06	3.48349e+06	1.50194e+06	2.06981e+06	759636	1.65418e+06	1.72619e+06	2.88679e+06	1.789e+06	2.08979e+06	2.8643e+06	1929409	3.40442e+06	3297942	3.10132e+06	2.55636e+06	3.12724e+06	2.75434e+06	3.52987e+06	3908393
15634967	562	PC(20:4(5Z,8Z,11Z,14Z)/16:1(9Z))	C44H78NO8P	None	None	584459	704531	667824	592126	498663	421717	451011	369307	541561	571895	776582	758064	489118	909377	475407	475404	276108	530507	281841	407284	371465	479263	476592	596666	606909	797803	477927	626099	276790	434778	373829	909031	453628	492341	826731	472985	897623	685136	758415	616120	716094	699093	801495	930267
15634968	562	PC(20:5(5Z,8Z,11Z,14Z,17Z)/16:0)	C44H78NO8P	None	None	584459	704531	667824	592126	498663	421717	451011	369307	541561	571895	776582	758064	489118	909377	475407	475404	276108	530507	281841	407284	371465	479263	476592	596666	606909	797803	477927	626099	276790	434778	373829	909031	453628	492341	826731	472985	897623	685136	758415	616120	716094	699093	801495	930267
15634969	562	PC(20:4(8Z,11Z,14Z,17Z)/16:1(9Z))	C44H78NO8P	None	None	584459	704531	667824	592126	498663	421717	451011	369307	541561	571895	776582	758064	489118	909377	475407	475404	276108	530507	281841	407284	371465	479263	476592	596666	606909	797803	477927	626099	276790	434778	373829	909031	453628	492341	826731	472985	897623	685136	758415	616120	716094	699093	801495	930267
15634970	562	PC(22:5(4Z,7Z,10Z,13Z,16Z)/14:0)	C44H78NO8P	None	None	584459	704531	667824	592126	498663	421717	451011	369307	541561	571895	776582	758064	489118	909377	475407	475404	276108	530507	281841	407284	371465	479263	476592	596666	606909	797803	477927	626099	276790	434778	373829	909031	453628	492341	826731	472985	897623	685136	758415	616120	716094	699093	801495	930267
15634971	562	PC(22:4(7Z,10Z,13Z,16Z)/14:1(9Z))	C44H78NO8P	None	None	584459	704531	667824	592126	498663	421717	451011	369307	541561	571895	776582	758064	489118	909377	475407	475404	276108	530507	281841	407284	371465	479263	476592	596666	606909	797803	477927	626099	276790	434778	373829	909031	453628	492341	826731	472985	897623	685136	758415	616120	716094	699093	801495	930267
15634972	562	PC(22:5(7Z,10Z,13Z,16Z,19Z)/14:0)	C44H78NO8P	None	None	584459	704531	667824	592126	498663	421717	451011	369307	541561	571895	776582	758064	489118	909377	475407	475404	276108	530507	281841	407284	371465	479263	476592	596666	606909	797803	477927	626099	276790	434778	373829	909031	453628	492341	826731	472985	897623	685136	758415	616120	716094	699093	801495	930267
15634973	562	PC(16:1(9Z)/20:4(8Z,11Z,14Z,17Z))	C44H78NO8P	None	None	584459	704531	667824	592126	498663	421717	451011	369307	541561	571895	776582	758064	489118	909377	475407	475404	276108	530507	281841	407284	371465	479263	476592	596666	606909	797803	477927	626099	276790	434778	373829	909031	453628	492341	826731	472985	897623	685136	758415	616120	716094	699093	801495	930267
15634974	562	PC(16:1(9Z)/20:4(5Z,8Z,11Z,14Z))	C44H78NO8P	None	None	584459	704531	667824	592126	498663	421717	451011	369307	541561	571895	776582	758064	489118	909377	475407	475404	276108	530507	281841	407284	371465	479263	476592	596666	606909	797803	477927	626099	276790	434778	373829	909031	453628	492341	826731	472985	897623	685136	758415	616120	716094	699093	801495	930267
15634977	562	PC(18:1(11Z)/18:4(6Z,9Z,12Z,15Z))	C44H78NO8P	None	None	584459	704531	667824	592126	498663	421717	451011	369307	541561	571895	776582	758064	489118	909377	475407	475404	276108	530507	281841	407284	371465	479263	476592	596666	606909	797803	477927	626099	276790	434778	373829	909031	453628	492341	826731	472985	897623	685136	758415	616120	716094	699093	801495	930267
15634980	562	PC(18:1(9Z)/18:4(6Z,9Z,12Z,15Z))	C44H78NO8P	None	None	584459	704531	667824	592126	498663	421717	451011	369307	541561	571895	776582	758064	489118	909377	475407	475404	276108	530507	281841	407284	371465	479263	476592	596666	606909	797803	477927	626099	276790	434778	373829	909031	453628	492341	826731	472985	897623	685136	758415	616120	716094	699093	801495	930267
15634982	562	PC(18:3(6Z,9Z,12Z)/18:2(9Z,12Z))	C44H78NO8P	None	None	584459	704531	667824	592126	498663	421717	451011	369307	541561	571895	776582	758064	489118	909377	475407	475404	276108	530507	281841	407284	371465	479263	476592	596666	606909	797803	477927	626099	276790	434778	373829	909031	453628	492341	826731	472985	897623	685136	758415	616120	716094	699093	801495	930267
15634983	562	PC(18:2(9Z,12Z)/18:3(9Z,12Z,15Z))	C44H78NO8P	None	None	584459	704531	667824	592126	498663	421717	451011	369307	541561	571895	776582	758064	489118	909377	475407	475404	276108	530507	281841	407284	371465	479263	476592	596666	606909	797803	477927	626099	276790	434778	373829	909031	453628	492341	826731	472985	897623	685136	758415	616120	716094	699093	801495	930267
15634984	562	PC(18:2(9Z,12Z)/18:3(6Z,9Z,12Z))	C44H78NO8P	None	None	584459	704531	667824	592126	498663	421717	451011	369307	541561	571895	776582	758064	489118	909377	475407	475404	276108	530507	281841	407284	371465	479263	476592	596666	606909	797803	477927	626099	276790	434778	373829	909031	453628	492341	826731	472985	897623	685136	758415	616120	716094	699093	801495	930267
15634985	562	PC(18:3(9Z,12Z,15Z)/18:2(9Z,12Z))	C44H78NO8P	None	None	584459	704531	667824	592126	498663	421717	451011	369307	541561	571895	776582	758064	489118	909377	475407	475404	276108	530507	281841	407284	371465	479263	476592	596666	606909	797803	477927	626099	276790	434778	373829	909031	453628	492341	826731	472985	897623	685136	758415	616120	716094	699093	801495	930267
15634986	562	PC(18:4(6Z,9Z,12Z,15Z)/18:1(9Z))	C44H78NO8P	None	None	584459	704531	667824	592126	498663	421717	451011	369307	541561	571895	776582	758064	489118	909377	475407	475404	276108	530507	281841	407284	371465	479263	476592	596666	606909	797803	477927	626099	276790	434778	373829	909031	453628	492341	826731	472985	897623	685136	758415	616120	716094	699093	801495	930267
15634987	562	PC(18:4(6Z,9Z,12Z,15Z)/18:1(11Z))	C44H78NO8P	None	None	584459	704531	667824	592126	498663	421717	451011	369307	541561	571895	776582	758064	489118	909377	475407	475404	276108	530507	281841	407284	371465	479263	476592	596666	606909	797803	477927	626099	276790	434778	373829	909031	453628	492341	826731	472985	897623	685136	758415	616120	716094	699093	801495	930267
15634989	562	PC(14:1(9Z)/22:4(7Z,10Z,13Z,16Z))	C44H78NO8P	None	None	584459	704531	667824	592126	498663	421717	451011	369307	541561	571895	776582	758064	489118	909377	475407	475404	276108	530507	281841	407284	371465	479263	476592	596666	606909	797803	477927	626099	276790	434778	373829	909031	453628	492341	826731	472985	897623	685136	758415	616120	716094	699093	801495	930267
15634991	562	PC(16:0/20:5(5Z,8Z,11Z,14Z,17Z))	C44H78NO8P	None	None	584459	704531	667824	592126	498663	421717	451011	369307	541561	571895	776582	758064	489118	909377	475407	475404	276108	530507	281841	407284	371465	479263	476592	596666	606909	797803	477927	626099	276790	434778	373829	909031	453628	492341	826731	472985	897623	685136	758415	616120	716094	699093	801495	930267
15635000	562	PC(14:0/22:5(7Z,10Z,13Z,16Z,19Z))	C44H78NO8P	None	None	584459	704531	667824	592126	498663	421717	451011	369307	541561	571895	776582	758064	489118	909377	475407	475404	276108	530507	281841	407284	371465	479263	476592	596666	606909	797803	477927	626099	276790	434778	373829	909031	453628	492341	826731	472985	897623	685136	758415	616120	716094	699093	801495	930267
15635001	562	PC(14:0/22:5(4Z,7Z,10Z,13Z,16Z))	C44H78NO8P	None	None	584459	704531	667824	592126	498663	421717	451011	369307	541561	571895	776582	758064	489118	909377	475407	475404	276108	530507	281841	407284	371465	479263	476592	596666	606909	797803	477927	626099	276790	434778	373829	909031	453628	492341	826731	472985	897623	685136	758415	616120	716094	699093	801495	930267
15635026	562	PE(22:4(7Z,10Z,13Z,16Z)/17:1(9Z))	C44H78NO8P	None	None	584459	704531	667824	592126	498663	421717	451011	369307	541561	571895	776582	758064	489118	909377	475407	475404	276108	530507	281841	407284	371465	479263	476592	596666	606909	797803	477927	626099	276790	434778	373829	909031	453628	492341	826731	472985	897623	685136	758415	616120	716094	699093	801495	930267
15635044	562	PC(16:1(7Z)/20:4(5Z,8Z,11Z,14Z))	C44H78NO8P	None	None	584459	704531	667824	592126	498663	421717	451011	369307	541561	571895	776582	758064	489118	909377	475407	475404	276108	530507	281841	407284	371465	479263	476592	596666	606909	797803	477927	626099	276790	434778	373829	909031	453628	492341	826731	472985	897623	685136	758415	616120	716094	699093	801495	930267
15635052	562	PE(19:0/20:5(5Z,8Z,11Z,14Z,17Z))	C44H78NO8P	None	None	584459	704531	667824	592126	498663	421717	451011	369307	541561	571895	776582	758064	489118	909377	475407	475404	276108	530507	281841	407284	371465	479263	476592	596666	606909	797803	477927	626099	276790	434778	373829	909031	453628	492341	826731	472985	897623	685136	758415	616120	716094	699093	801495	930267
15635056	562	PE(17:1(9Z)/22:4(7Z,10Z,13Z,16Z))	C44H78NO8P	None	None	584459	704531	667824	592126	498663	421717	451011	369307	541561	571895	776582	758064	489118	909377	475407	475404	276108	530507	281841	407284	371465	479263	476592	596666	606909	797803	477927	626099	276790	434778	373829	909031	453628	492341	826731	472985	897623	685136	758415	616120	716094	699093	801495	930267
15635061	562	PE(19:1(9Z)/20:4(5Z,8Z,11Z,14Z))	C44H78NO8P	None	None	584459	704531	667824	592126	498663	421717	451011	369307	541561	571895	776582	758064	489118	909377	475407	475404	276108	530507	281841	407284	371465	479263	476592	596666	606909	797803	477927	626099	276790	434778	373829	909031	453628	492341	826731	472985	897623	685136	758415	616120	716094	699093	801495	930267
15635064	562	PE(20:4(5Z,8Z,11Z,14Z)/19:1(9Z))	C44H78NO8P	None	None	584459	704531	667824	592126	498663	421717	451011	369307	541561	571895	776582	758064	489118	909377	475407	475404	276108	530507	281841	407284	371465	479263	476592	596666	606909	797803	477927	626099	276790	434778	373829	909031	453628	492341	826731	472985	897623	685136	758415	616120	716094	699093	801495	930267
15635065	562	PE(20:5(5Z,8Z,11Z,14Z,17Z)/19:0)	C44H78NO8P	None	None	584459	704531	667824	592126	498663	421717	451011	369307	541561	571895	776582	758064	489118	909377	475407	475404	276108	530507	281841	407284	371465	479263	476592	596666	606909	797803	477927	626099	276790	434778	373829	909031	453628	492341	826731	472985	897623	685136	758415	616120	716094	699093	801495	930267
15635068	564	L-Kynurenine	C10H12N2O3	Metabolism; Amino acid metabolism Human Diseases; Infectious diseases	Tryptophan metabolism African trypanosomiasis	1.30851e+06	1.24866e+06	2.40634e+06	1.42172e+06	3.23568e+06	1.18106e+06	2.57557e+06	991714	1.36511e+06	1.19232e+06	811726	1.45567e+06	1.34584e+06	1.29489e+06	544966	2.91015e+06	947481	1.2436e+06	1.22438e+06	866181	805177	1.23179e+06	592090	1.04257e+06	836636	1.84742e+06	954376	1285290	353160	834115	1.21372e+06	2.28432e+06	1.9687e+06	1823102	1.59353e+06	1.43941e+06	2.59641e+06	1.54533e+06	1459346	982346	1.08045e+06	1946394	1.37941e+06	2.47903e+06
15635070	564	4-Aminobenzoyl-(beta)-alanine	C10H12N2O3	None	None	1.30851e+06	1.24866e+06	2.40634e+06	1.42172e+06	3.23568e+06	1.18106e+06	2.57557e+06	991714	1.36511e+06	1.19232e+06	811726	1.45567e+06	1.34584e+06	1.29489e+06	544966	2.91015e+06	947481	1.2436e+06	1.22438e+06	866181	805177	1.23179e+06	592090	1.04257e+06	836636	1.84742e+06	954376	1285290	353160	834115	1.21372e+06	2.28432e+06	1.9687e+06	1823102	1.59353e+06	1.43941e+06	2.59641e+06	1.54533e+06	1459346	982346	1.08045e+06	1946394	1.37941e+06	2.47903e+06
15635073	564	Formyl-5-hydroxykynurenamine	C10H12N2O3	Metabolism; Amino acid metabolism	Tryptophan metabolism	1.30851e+06	1.24866e+06	2.40634e+06	1.42172e+06	3.23568e+06	1.18106e+06	2.57557e+06	991714	1.36511e+06	1.19232e+06	811726	1.45567e+06	1.34584e+06	1.29489e+06	544966	2.91015e+06	947481	1.2436e+06	1.22438e+06	866181	805177	1.23179e+06	592090	1.04257e+06	836636	1.84742e+06	954376	1285290	353160	834115	1.21372e+06	2.28432e+06	1.9687e+06	1823102	1.59353e+06	1.43941e+06	2.59641e+06	1.54533e+06	1459346	982346	1.08045e+06	1946394	1.37941e+06	2.47903e+06
15635074	564	Kynurenine	C10H12N2O3	None	None	1.30851e+06	1.24866e+06	2.40634e+06	1.42172e+06	3.23568e+06	1.18106e+06	2.57557e+06	991714	1.36511e+06	1.19232e+06	811726	1.45567e+06	1.34584e+06	1.29489e+06	544966	2.91015e+06	947481	1.2436e+06	1.22438e+06	866181	805177	1.23179e+06	592090	1.04257e+06	836636	1.84742e+06	954376	1285290	353160	834115	1.21372e+06	2.28432e+06	1.9687e+06	1823102	1.59353e+06	1.43941e+06	2.59641e+06	1.54533e+06	1459346	982346	1.08045e+06	1946394	1.37941e+06	2.47903e+06
15635155	573	Anandamide (20:2, n-6)	C22H41NO2	None	None	1.36468e+06	787966	1.90045e+06	1.20722e+06	1.10452e+06	1.12345e+06	1.62546e+06	1661672	1.28595e+06	1.24089e+06	3.85338e+06	1965953	1863948	1.57518e+06	3.88863e+06	1.1162e+06	692273	1.71957e+06	1.31397e+06	4.25932e+06	527812	1.53361e+06	2.40221e+06	1.6118e+06	1.93709e+06	1.23972e+06	1.5727e+06	1.24407e+06	1.53486e+06	928375	2164074	1.04764e+06	777854	675569	1.50865e+06	1.14586e+06	1.30453e+06	238749	211358	2.25959e+06	607860	501037	415224	670039
15635171	574	Carnosine	C9H14N4O3	Metabolism; Metabolism of other amino acids Metabolism; Amino acid metabolism	beta-Alanine metabolism Histidine metabolism	2.77026e+06	2.35434e+06	2.48577e+06	2.83485e+06	2.16874e+06	1.67452e+06	3.67067e+06	1.35106e+06	2.42006e+06	3.14414e+06	2.17363e+06	1.60377e+06	3176099	3.33638e+06	849380	3.79752e+06	1.47424e+06	2.65889e+06	2.36766e+06	2.65315e+06	1.48737e+06	2.34701e+06	787680	2.97844e+06	1.15865e+06	2.15289e+06	2249950	2.76135e+06	697980	1.20488e+06	3.40538e+06	1.97e+06	3211185	2.43121e+06	1.78727e+06	2.20061e+06	1.67781e+06	4.0679e+06	2.32379e+06	1.93376e+06	3.35927e+06	2.82304e+06	2.14627e+06	2.01523e+06
15635172	574	Histidinyl-Alanine	C9H14N4O3	None	None	2.77026e+06	2.35434e+06	2.48577e+06	2.83485e+06	2.16874e+06	1.67452e+06	3.67067e+06	1.35106e+06	2.42006e+06	3.14414e+06	2.17363e+06	1.60377e+06	3176099	3.33638e+06	849380	3.79752e+06	1.47424e+06	2.65889e+06	2.36766e+06	2.65315e+06	1.48737e+06	2.34701e+06	787680	2.97844e+06	1.15865e+06	2.15289e+06	2249950	2.76135e+06	697980	1.20488e+06	3.40538e+06	1.97e+06	3211185	2.43121e+06	1.78727e+06	2.20061e+06	1.67781e+06	4.0679e+06	2.32379e+06	1.93376e+06	3.35927e+06	2.82304e+06	2.14627e+06	2.01523e+06
15635173	574	Alanyl-Histidine	C9H14N4O3	None	None	2.77026e+06	2.35434e+06	2.48577e+06	2.83485e+06	2.16874e+06	1.67452e+06	3.67067e+06	1.35106e+06	2.42006e+06	3.14414e+06	2.17363e+06	1.60377e+06	3176099	3.33638e+06	849380	3.79752e+06	1.47424e+06	2.65889e+06	2.36766e+06	2.65315e+06	1.48737e+06	2.34701e+06	787680	2.97844e+06	1.15865e+06	2.15289e+06	2249950	2.76135e+06	697980	1.20488e+06	3.40538e+06	1.97e+06	3211185	2.43121e+06	1.78727e+06	2.20061e+06	1.67781e+06	4.0679e+06	2.32379e+06	1.93376e+06	3.35927e+06	2.82304e+06	2.14627e+06	2.01523e+06
15635174	574	(6R)-6-(L-Erythro-1,2-Dihydroxypropyl)-5,6,7,8-tetrahydro-4a-hydroxypterin	C9H14N4O3	None	None	2.77026e+06	2.35434e+06	2.48577e+06	2.83485e+06	2.16874e+06	1.67452e+06	3.67067e+06	1.35106e+06	2.42006e+06	3.14414e+06	2.17363e+06	1.60377e+06	3176099	3.33638e+06	849380	3.79752e+06	1.47424e+06	2.65889e+06	2.36766e+06	2.65315e+06	1.48737e+06	2.34701e+06	787680	2.97844e+06	1.15865e+06	2.15289e+06	2249950	2.76135e+06	697980	1.20488e+06	3.40538e+06	1.97e+06	3211185	2.43121e+06	1.78727e+06	2.20061e+06	1.67781e+06	4.0679e+06	2.32379e+06	1.93376e+06	3.35927e+06	2.82304e+06	2.14627e+06	2.01523e+06
15635176	577	PC(O-16:0/18:2(9Z,12Z))	C42H82NO7P	None	None	3122597	3.14079e+06	2.96951e+06	2.16391e+06	3389812	2.54094e+06	2.42196e+06	2.04817e+06	2.75523e+06	2474702	2977909	2.44319e+06	2.10155e+06	2.70979e+06	2.0319e+06	2.87175e+06	1.86116e+06	2.45895e+06	1839051	1.9954e+06	1599505	1.88972e+06	1.79644e+06	2.27751e+06	2526321	2.90127e+06	1.94256e+06	2.46589e+06	1.20786e+06	2.93144e+06	1.83564e+06	3.8078e+06	2386631	2813343	2.81513e+06	2.63962e+06	1.89519e+06	2.99285e+06	2.12354e+06	2.70476e+06	2.03289e+06	2.95304e+06	3.17471e+06	2.11537e+06
15635177	577	PC(P-18:1(11Z)/16:0)	C42H82NO7P	None	None	3122597	3.14079e+06	2.96951e+06	2.16391e+06	3389812	2.54094e+06	2.42196e+06	2.04817e+06	2.75523e+06	2474702	2977909	2.44319e+06	2.10155e+06	2.70979e+06	2.0319e+06	2.87175e+06	1.86116e+06	2.45895e+06	1839051	1.9954e+06	1599505	1.88972e+06	1.79644e+06	2.27751e+06	2526321	2.90127e+06	1.94256e+06	2.46589e+06	1.20786e+06	2.93144e+06	1.83564e+06	3.8078e+06	2386631	2813343	2.81513e+06	2.63962e+06	1.89519e+06	2.99285e+06	2.12354e+06	2.70476e+06	2.03289e+06	2.95304e+06	3.17471e+06	2.11537e+06
15635178	577	PC(P-18:0/16:1(9Z))	C42H82NO7P	None	None	3122597	3.14079e+06	2.96951e+06	2.16391e+06	3389812	2.54094e+06	2.42196e+06	2.04817e+06	2.75523e+06	2474702	2977909	2.44319e+06	2.10155e+06	2.70979e+06	2.0319e+06	2.87175e+06	1.86116e+06	2.45895e+06	1839051	1.9954e+06	1599505	1.88972e+06	1.79644e+06	2.27751e+06	2526321	2.90127e+06	1.94256e+06	2.46589e+06	1.20786e+06	2.93144e+06	1.83564e+06	3.8078e+06	2386631	2813343	2.81513e+06	2.63962e+06	1.89519e+06	2.99285e+06	2.12354e+06	2.70476e+06	2.03289e+06	2.95304e+06	3.17471e+06	2.11537e+06
15635179	577	PC(P-16:0/18:1(11Z))	C42H82NO7P	None	None	3122597	3.14079e+06	2.96951e+06	2.16391e+06	3389812	2.54094e+06	2.42196e+06	2.04817e+06	2.75523e+06	2474702	2977909	2.44319e+06	2.10155e+06	2.70979e+06	2.0319e+06	2.87175e+06	1.86116e+06	2.45895e+06	1839051	1.9954e+06	1599505	1.88972e+06	1.79644e+06	2.27751e+06	2526321	2.90127e+06	1.94256e+06	2.46589e+06	1.20786e+06	2.93144e+06	1.83564e+06	3.8078e+06	2386631	2813343	2.81513e+06	2.63962e+06	1.89519e+06	2.99285e+06	2.12354e+06	2.70476e+06	2.03289e+06	2.95304e+06	3.17471e+06	2.11537e+06
15635180	577	PC(P-16:0/18:1(9Z))	C42H82NO7P	None	None	3122597	3.14079e+06	2.96951e+06	2.16391e+06	3389812	2.54094e+06	2.42196e+06	2.04817e+06	2.75523e+06	2474702	2977909	2.44319e+06	2.10155e+06	2.70979e+06	2.0319e+06	2.87175e+06	1.86116e+06	2.45895e+06	1839051	1.9954e+06	1599505	1.88972e+06	1.79644e+06	2.27751e+06	2526321	2.90127e+06	1.94256e+06	2.46589e+06	1.20786e+06	2.93144e+06	1.83564e+06	3.8078e+06	2386631	2813343	2.81513e+06	2.63962e+06	1.89519e+06	2.99285e+06	2.12354e+06	2.70476e+06	2.03289e+06	2.95304e+06	3.17471e+06	2.11537e+06
15635181	577	PC(P-18:1(9Z)/16:0)	C42H82NO7P	None	None	3122597	3.14079e+06	2.96951e+06	2.16391e+06	3389812	2.54094e+06	2.42196e+06	2.04817e+06	2.75523e+06	2474702	2977909	2.44319e+06	2.10155e+06	2.70979e+06	2.0319e+06	2.87175e+06	1.86116e+06	2.45895e+06	1839051	1.9954e+06	1599505	1.88972e+06	1.79644e+06	2.27751e+06	2526321	2.90127e+06	1.94256e+06	2.46589e+06	1.20786e+06	2.93144e+06	1.83564e+06	3.8078e+06	2386631	2813343	2.81513e+06	2.63962e+06	1.89519e+06	2.99285e+06	2.12354e+06	2.70476e+06	2.03289e+06	2.95304e+06	3.17471e+06	2.11537e+06
15635182	577	PC(16:1(9Z)/P-18:0)	C42H82NO7P	None	None	3122597	3.14079e+06	2.96951e+06	2.16391e+06	3389812	2.54094e+06	2.42196e+06	2.04817e+06	2.75523e+06	2474702	2977909	2.44319e+06	2.10155e+06	2.70979e+06	2.0319e+06	2.87175e+06	1.86116e+06	2.45895e+06	1839051	1.9954e+06	1599505	1.88972e+06	1.79644e+06	2.27751e+06	2526321	2.90127e+06	1.94256e+06	2.46589e+06	1.20786e+06	2.93144e+06	1.83564e+06	3.8078e+06	2386631	2813343	2.81513e+06	2.63962e+06	1.89519e+06	2.99285e+06	2.12354e+06	2.70476e+06	2.03289e+06	2.95304e+06	3.17471e+06	2.11537e+06
15635183	577	PC(18:1(11Z)/P-16:0)	C42H82NO7P	None	None	3122597	3.14079e+06	2.96951e+06	2.16391e+06	3389812	2.54094e+06	2.42196e+06	2.04817e+06	2.75523e+06	2474702	2977909	2.44319e+06	2.10155e+06	2.70979e+06	2.0319e+06	2.87175e+06	1.86116e+06	2.45895e+06	1839051	1.9954e+06	1599505	1.88972e+06	1.79644e+06	2.27751e+06	2526321	2.90127e+06	1.94256e+06	2.46589e+06	1.20786e+06	2.93144e+06	1.83564e+06	3.8078e+06	2386631	2813343	2.81513e+06	2.63962e+06	1.89519e+06	2.99285e+06	2.12354e+06	2.70476e+06	2.03289e+06	2.95304e+06	3.17471e+06	2.11537e+06
15635184	577	PC(18:1(9Z)/P-16:0)	C42H82NO7P	None	None	3122597	3.14079e+06	2.96951e+06	2.16391e+06	3389812	2.54094e+06	2.42196e+06	2.04817e+06	2.75523e+06	2474702	2977909	2.44319e+06	2.10155e+06	2.70979e+06	2.0319e+06	2.87175e+06	1.86116e+06	2.45895e+06	1839051	1.9954e+06	1599505	1.88972e+06	1.79644e+06	2.27751e+06	2526321	2.90127e+06	1.94256e+06	2.46589e+06	1.20786e+06	2.93144e+06	1.83564e+06	3.8078e+06	2386631	2813343	2.81513e+06	2.63962e+06	1.89519e+06	2.99285e+06	2.12354e+06	2.70476e+06	2.03289e+06	2.95304e+06	3.17471e+06	2.11537e+06
15635185	577	PC(16:0/P-18:1(9Z))	C42H82NO7P	None	None	3122597	3.14079e+06	2.96951e+06	2.16391e+06	3389812	2.54094e+06	2.42196e+06	2.04817e+06	2.75523e+06	2474702	2977909	2.44319e+06	2.10155e+06	2.70979e+06	2.0319e+06	2.87175e+06	1.86116e+06	2.45895e+06	1839051	1.9954e+06	1599505	1.88972e+06	1.79644e+06	2.27751e+06	2526321	2.90127e+06	1.94256e+06	2.46589e+06	1.20786e+06	2.93144e+06	1.83564e+06	3.8078e+06	2386631	2813343	2.81513e+06	2.63962e+06	1.89519e+06	2.99285e+06	2.12354e+06	2.70476e+06	2.03289e+06	2.95304e+06	3.17471e+06	2.11537e+06
15635186	577	PC(16:0/P-18:1(11Z))	C42H82NO7P	None	None	3122597	3.14079e+06	2.96951e+06	2.16391e+06	3389812	2.54094e+06	2.42196e+06	2.04817e+06	2.75523e+06	2474702	2977909	2.44319e+06	2.10155e+06	2.70979e+06	2.0319e+06	2.87175e+06	1.86116e+06	2.45895e+06	1839051	1.9954e+06	1599505	1.88972e+06	1.79644e+06	2.27751e+06	2526321	2.90127e+06	1.94256e+06	2.46589e+06	1.20786e+06	2.93144e+06	1.83564e+06	3.8078e+06	2386631	2813343	2.81513e+06	2.63962e+06	1.89519e+06	2.99285e+06	2.12354e+06	2.70476e+06	2.03289e+06	2.95304e+06	3.17471e+06	2.11537e+06
15635187	577	PC(16:1(9Z)/P-18:0)	C42H82NO7P	None	None	3122597	3.14079e+06	2.96951e+06	2.16391e+06	3389812	2.54094e+06	2.42196e+06	2.04817e+06	2.75523e+06	2474702	2977909	2.44319e+06	2.10155e+06	2.70979e+06	2.0319e+06	2.87175e+06	1.86116e+06	2.45895e+06	1839051	1.9954e+06	1599505	1.88972e+06	1.79644e+06	2.27751e+06	2526321	2.90127e+06	1.94256e+06	2.46589e+06	1.20786e+06	2.93144e+06	1.83564e+06	3.8078e+06	2386631	2813343	2.81513e+06	2.63962e+06	1.89519e+06	2.99285e+06	2.12354e+06	2.70476e+06	2.03289e+06	2.95304e+06	3.17471e+06	2.11537e+06
15635188	577	PC(16:0/P-18:1(11Z))	C42H82NO7P	None	None	3122597	3.14079e+06	2.96951e+06	2.16391e+06	3389812	2.54094e+06	2.42196e+06	2.04817e+06	2.75523e+06	2474702	2977909	2.44319e+06	2.10155e+06	2.70979e+06	2.0319e+06	2.87175e+06	1.86116e+06	2.45895e+06	1839051	1.9954e+06	1599505	1.88972e+06	1.79644e+06	2.27751e+06	2526321	2.90127e+06	1.94256e+06	2.46589e+06	1.20786e+06	2.93144e+06	1.83564e+06	3.8078e+06	2386631	2813343	2.81513e+06	2.63962e+06	1.89519e+06	2.99285e+06	2.12354e+06	2.70476e+06	2.03289e+06	2.95304e+06	3.17471e+06	2.11537e+06
15635189	577	PC(16:0/P-18:1(9Z))	C42H82NO7P	None	None	3122597	3.14079e+06	2.96951e+06	2.16391e+06	3389812	2.54094e+06	2.42196e+06	2.04817e+06	2.75523e+06	2474702	2977909	2.44319e+06	2.10155e+06	2.70979e+06	2.0319e+06	2.87175e+06	1.86116e+06	2.45895e+06	1839051	1.9954e+06	1599505	1.88972e+06	1.79644e+06	2.27751e+06	2526321	2.90127e+06	1.94256e+06	2.46589e+06	1.20786e+06	2.93144e+06	1.83564e+06	3.8078e+06	2386631	2813343	2.81513e+06	2.63962e+06	1.89519e+06	2.99285e+06	2.12354e+06	2.70476e+06	2.03289e+06	2.95304e+06	3.17471e+06	2.11537e+06
15635190	577	PC(18:1(11Z)/P-16:0)	C42H82NO7P	None	None	3122597	3.14079e+06	2.96951e+06	2.16391e+06	3389812	2.54094e+06	2.42196e+06	2.04817e+06	2.75523e+06	2474702	2977909	2.44319e+06	2.10155e+06	2.70979e+06	2.0319e+06	2.87175e+06	1.86116e+06	2.45895e+06	1839051	1.9954e+06	1599505	1.88972e+06	1.79644e+06	2.27751e+06	2526321	2.90127e+06	1.94256e+06	2.46589e+06	1.20786e+06	2.93144e+06	1.83564e+06	3.8078e+06	2386631	2813343	2.81513e+06	2.63962e+06	1.89519e+06	2.99285e+06	2.12354e+06	2.70476e+06	2.03289e+06	2.95304e+06	3.17471e+06	2.11537e+06
15635193	577	PnC(16:0/18:1(9Z))	C42H82NO7P	None	None	3122597	3.14079e+06	2.96951e+06	2.16391e+06	3389812	2.54094e+06	2.42196e+06	2.04817e+06	2.75523e+06	2474702	2977909	2.44319e+06	2.10155e+06	2.70979e+06	2.0319e+06	2.87175e+06	1.86116e+06	2.45895e+06	1839051	1.9954e+06	1599505	1.88972e+06	1.79644e+06	2.27751e+06	2526321	2.90127e+06	1.94256e+06	2.46589e+06	1.20786e+06	2.93144e+06	1.83564e+06	3.8078e+06	2386631	2813343	2.81513e+06	2.63962e+06	1.89519e+06	2.99285e+06	2.12354e+06	2.70476e+06	2.03289e+06	2.95304e+06	3.17471e+06	2.11537e+06
15635197	577	PE(P-20:0/17:1(9Z))	C42H82NO7P	None	None	3122597	3.14079e+06	2.96951e+06	2.16391e+06	3389812	2.54094e+06	2.42196e+06	2.04817e+06	2.75523e+06	2474702	2977909	2.44319e+06	2.10155e+06	2.70979e+06	2.0319e+06	2.87175e+06	1.86116e+06	2.45895e+06	1839051	1.9954e+06	1599505	1.88972e+06	1.79644e+06	2.27751e+06	2526321	2.90127e+06	1.94256e+06	2.46589e+06	1.20786e+06	2.93144e+06	1.83564e+06	3.8078e+06	2386631	2813343	2.81513e+06	2.63962e+06	1.89519e+06	2.99285e+06	2.12354e+06	2.70476e+06	2.03289e+06	2.95304e+06	3.17471e+06	2.11537e+06
15635198	577	PE(P-18:0/19:1(9Z))	C42H82NO7P	None	None	3122597	3.14079e+06	2.96951e+06	2.16391e+06	3389812	2.54094e+06	2.42196e+06	2.04817e+06	2.75523e+06	2474702	2977909	2.44319e+06	2.10155e+06	2.70979e+06	2.0319e+06	2.87175e+06	1.86116e+06	2.45895e+06	1839051	1.9954e+06	1599505	1.88972e+06	1.79644e+06	2.27751e+06	2526321	2.90127e+06	1.94256e+06	2.46589e+06	1.20786e+06	2.93144e+06	1.83564e+06	3.8078e+06	2386631	2813343	2.81513e+06	2.63962e+06	1.89519e+06	2.99285e+06	2.12354e+06	2.70476e+06	2.03289e+06	2.95304e+06	3.17471e+06	2.11537e+06
15635199	577	PC(P-20:0/14:1(9Z))	C42H82NO7P	None	None	3122597	3.14079e+06	2.96951e+06	2.16391e+06	3389812	2.54094e+06	2.42196e+06	2.04817e+06	2.75523e+06	2474702	2977909	2.44319e+06	2.10155e+06	2.70979e+06	2.0319e+06	2.87175e+06	1.86116e+06	2.45895e+06	1839051	1.9954e+06	1599505	1.88972e+06	1.79644e+06	2.27751e+06	2526321	2.90127e+06	1.94256e+06	2.46589e+06	1.20786e+06	2.93144e+06	1.83564e+06	3.8078e+06	2386631	2813343	2.81513e+06	2.63962e+06	1.89519e+06	2.99285e+06	2.12354e+06	2.70476e+06	2.03289e+06	2.95304e+06	3.17471e+06	2.11537e+06
15635200	577	PC(P-18:1(11Z)/16:0)	C42H82NO7P	None	None	3122597	3.14079e+06	2.96951e+06	2.16391e+06	3389812	2.54094e+06	2.42196e+06	2.04817e+06	2.75523e+06	2474702	2977909	2.44319e+06	2.10155e+06	2.70979e+06	2.0319e+06	2.87175e+06	1.86116e+06	2.45895e+06	1839051	1.9954e+06	1599505	1.88972e+06	1.79644e+06	2.27751e+06	2526321	2.90127e+06	1.94256e+06	2.46589e+06	1.20786e+06	2.93144e+06	1.83564e+06	3.8078e+06	2386631	2813343	2.81513e+06	2.63962e+06	1.89519e+06	2.99285e+06	2.12354e+06	2.70476e+06	2.03289e+06	2.95304e+06	3.17471e+06	2.11537e+06
15635201	577	PE(O-20:0/17:2(9Z,12Z))	C42H82NO7P	None	None	3122597	3.14079e+06	2.96951e+06	2.16391e+06	3389812	2.54094e+06	2.42196e+06	2.04817e+06	2.75523e+06	2474702	2977909	2.44319e+06	2.10155e+06	2.70979e+06	2.0319e+06	2.87175e+06	1.86116e+06	2.45895e+06	1839051	1.9954e+06	1599505	1.88972e+06	1.79644e+06	2.27751e+06	2526321	2.90127e+06	1.94256e+06	2.46589e+06	1.20786e+06	2.93144e+06	1.83564e+06	3.8078e+06	2386631	2813343	2.81513e+06	2.63962e+06	1.89519e+06	2.99285e+06	2.12354e+06	2.70476e+06	2.03289e+06	2.95304e+06	3.17471e+06	2.11537e+06
15635202	578	PE(20:1(11Z)/P-18:1(11Z))	C43H82NO7P	None	None	1.49066e+06	1.19685e+06	1267693	814771	1.44025e+06	947265	1.00046e+06	590746	1.09865e+06	1.177e+06	1.24484e+06	894796	836486	1102280	371186	1.03665e+06	632073	965722	835664	992134	509049	767377	396061	526890	1.05769e+06	881916	801521	658446	353441	854345	760322	1.19213e+06	972982	951499	814991	834668	734058	1.18597e+06	716849	1.0628e+06	881530	1.32621e+06	1.00194e+06	735283
15635203	578	PE(20:1(11Z)/P-18:1(9Z))	C43H82NO7P	None	None	1.49066e+06	1.19685e+06	1267693	814771	1.44025e+06	947265	1.00046e+06	590746	1.09865e+06	1.177e+06	1.24484e+06	894796	836486	1102280	371186	1.03665e+06	632073	965722	835664	992134	509049	767377	396061	526890	1.05769e+06	881916	801521	658446	353441	854345	760322	1.19213e+06	972982	951499	814991	834668	734058	1.18597e+06	716849	1.0628e+06	881530	1.32621e+06	1.00194e+06	735283
15635204	578	PE(20:2(11Z,14Z)/P-18:0)	C43H82NO7P	None	None	1.49066e+06	1.19685e+06	1267693	814771	1.44025e+06	947265	1.00046e+06	590746	1.09865e+06	1.177e+06	1.24484e+06	894796	836486	1102280	371186	1.03665e+06	632073	965722	835664	992134	509049	767377	396061	526890	1.05769e+06	881916	801521	658446	353441	854345	760322	1.19213e+06	972982	951499	814991	834668	734058	1.18597e+06	716849	1.0628e+06	881530	1.32621e+06	1.00194e+06	735283
15635205	578	PE(22:2(13Z,16Z)/P-16:0)	C43H82NO7P	None	None	1.49066e+06	1.19685e+06	1267693	814771	1.44025e+06	947265	1.00046e+06	590746	1.09865e+06	1.177e+06	1.24484e+06	894796	836486	1102280	371186	1.03665e+06	632073	965722	835664	992134	509049	767377	396061	526890	1.05769e+06	881916	801521	658446	353441	854345	760322	1.19213e+06	972982	951499	814991	834668	734058	1.18597e+06	716849	1.0628e+06	881530	1.32621e+06	1.00194e+06	735283
15635206	578	PE(P-16:0/22:2(13Z,16Z))	C43H82NO7P	None	None	1.49066e+06	1.19685e+06	1267693	814771	1.44025e+06	947265	1.00046e+06	590746	1.09865e+06	1.177e+06	1.24484e+06	894796	836486	1102280	371186	1.03665e+06	632073	965722	835664	992134	509049	767377	396061	526890	1.05769e+06	881916	801521	658446	353441	854345	760322	1.19213e+06	972982	951499	814991	834668	734058	1.18597e+06	716849	1.0628e+06	881530	1.32621e+06	1.00194e+06	735283
15635207	578	PE(P-18:0/20:2(11Z,14Z))	C43H82NO7P	None	None	1.49066e+06	1.19685e+06	1267693	814771	1.44025e+06	947265	1.00046e+06	590746	1.09865e+06	1.177e+06	1.24484e+06	894796	836486	1102280	371186	1.03665e+06	632073	965722	835664	992134	509049	767377	396061	526890	1.05769e+06	881916	801521	658446	353441	854345	760322	1.19213e+06	972982	951499	814991	834668	734058	1.18597e+06	716849	1.0628e+06	881530	1.32621e+06	1.00194e+06	735283
15635208	578	PE(P-18:1(11Z)/20:1(11Z))	C43H82NO7P	None	None	1.49066e+06	1.19685e+06	1267693	814771	1.44025e+06	947265	1.00046e+06	590746	1.09865e+06	1.177e+06	1.24484e+06	894796	836486	1102280	371186	1.03665e+06	632073	965722	835664	992134	509049	767377	396061	526890	1.05769e+06	881916	801521	658446	353441	854345	760322	1.19213e+06	972982	951499	814991	834668	734058	1.18597e+06	716849	1.0628e+06	881530	1.32621e+06	1.00194e+06	735283
15635209	578	PE(P-18:1(9Z)/20:1(11Z))	C43H82NO7P	None	None	1.49066e+06	1.19685e+06	1267693	814771	1.44025e+06	947265	1.00046e+06	590746	1.09865e+06	1.177e+06	1.24484e+06	894796	836486	1102280	371186	1.03665e+06	632073	965722	835664	992134	509049	767377	396061	526890	1.05769e+06	881916	801521	658446	353441	854345	760322	1.19213e+06	972982	951499	814991	834668	734058	1.18597e+06	716849	1.0628e+06	881530	1.32621e+06	1.00194e+06	735283
15635219	578	PE(P-20:0/18:2(9Z,12Z))	C43H82NO7P	None	None	1.49066e+06	1.19685e+06	1267693	814771	1.44025e+06	947265	1.00046e+06	590746	1.09865e+06	1.177e+06	1.24484e+06	894796	836486	1102280	371186	1.03665e+06	632073	965722	835664	992134	509049	767377	396061	526890	1.05769e+06	881916	801521	658446	353441	854345	760322	1.19213e+06	972982	951499	814991	834668	734058	1.18597e+06	716849	1.0628e+06	881530	1.32621e+06	1.00194e+06	735283
15635220	578	PC(P-18:0/17:2(9Z,12Z))	C43H82NO7P	None	None	1.49066e+06	1.19685e+06	1267693	814771	1.44025e+06	947265	1.00046e+06	590746	1.09865e+06	1.177e+06	1.24484e+06	894796	836486	1102280	371186	1.03665e+06	632073	965722	835664	992134	509049	767377	396061	526890	1.05769e+06	881916	801521	658446	353441	854345	760322	1.19213e+06	972982	951499	814991	834668	734058	1.18597e+06	716849	1.0628e+06	881530	1.32621e+06	1.00194e+06	735283
15635221	578	PE(O-18:0/20:3(8Z,11Z,14Z))	C43H82NO7P	None	None	1.49066e+06	1.19685e+06	1267693	814771	1.44025e+06	947265	1.00046e+06	590746	1.09865e+06	1.177e+06	1.24484e+06	894796	836486	1102280	371186	1.03665e+06	632073	965722	835664	992134	509049	767377	396061	526890	1.05769e+06	881916	801521	658446	353441	854345	760322	1.19213e+06	972982	951499	814991	834668	734058	1.18597e+06	716849	1.0628e+06	881530	1.32621e+06	1.00194e+06	735283
15635222	578	PE(O-20:0/18:3(9Z,12Z,15Z))	C43H82NO7P	None	None	1.49066e+06	1.19685e+06	1267693	814771	1.44025e+06	947265	1.00046e+06	590746	1.09865e+06	1.177e+06	1.24484e+06	894796	836486	1102280	371186	1.03665e+06	632073	965722	835664	992134	509049	767377	396061	526890	1.05769e+06	881916	801521	658446	353441	854345	760322	1.19213e+06	972982	951499	814991	834668	734058	1.18597e+06	716849	1.0628e+06	881530	1.32621e+06	1.00194e+06	735283
15635223	578	PE(O-20:0/18:3(6Z,9Z,12Z))	C43H82NO7P	None	None	1.49066e+06	1.19685e+06	1267693	814771	1.44025e+06	947265	1.00046e+06	590746	1.09865e+06	1.177e+06	1.24484e+06	894796	836486	1102280	371186	1.03665e+06	632073	965722	835664	992134	509049	767377	396061	526890	1.05769e+06	881916	801521	658446	353441	854345	760322	1.19213e+06	972982	951499	814991	834668	734058	1.18597e+06	716849	1.0628e+06	881530	1.32621e+06	1.00194e+06	735283
15635265	580	(E)-Urocanic acid	C6H6N2O2	None	None	332647	289026	573351	448797	919710	787672	3.50477e+06	329177	511074	442150	448098	398340	482614	418410	525194	322598	366001	430280	407011	433859	521524	487689	644829	469506	581961	541426	504606	925805	622877	655541	613712	1.03018e+06	341054	204227	678117	639209	473747	256026	373201	469281	333660	981153	323069	321850
15635266	580	Urocanic acid	C6H6N2O2	Metabolism; Amino acid metabolism	Histidine metabolism	332647	289026	573351	448797	919710	787672	3.50477e+06	329177	511074	442150	448098	398340	482614	418410	525194	322598	366001	430280	407011	433859	521524	487689	644829	469506	581961	541426	504606	925805	622877	655541	613712	1.03018e+06	341054	204227	678117	639209	473747	256026	373201	469281	333660	981153	323069	321850
15635267	580	2-Aminonicotinic acid	C6H6N2O2	None	None	332647	289026	573351	448797	919710	787672	3.50477e+06	329177	511074	442150	448098	398340	482614	418410	525194	322598	366001	430280	407011	433859	521524	487689	644829	469506	581961	541426	504606	925805	622877	655541	613712	1.03018e+06	341054	204227	678117	639209	473747	256026	373201	469281	333660	981153	323069	321850
15635268	580	Nicotinamide N-oxide	C6H6N2O2	None	None	332647	289026	573351	448797	919710	787672	3.50477e+06	329177	511074	442150	448098	398340	482614	418410	525194	322598	366001	430280	407011	433859	521524	487689	644829	469506	581961	541426	504606	925805	622877	655541	613712	1.03018e+06	341054	204227	678117	639209	473747	256026	373201	469281	333660	981153	323069	321850
15635269	580	5-Oxo-2(5H)-isoxazolepropanenitrile	C6H6N2O2	None	None	332647	289026	573351	448797	919710	787672	3.50477e+06	329177	511074	442150	448098	398340	482614	418410	525194	322598	366001	430280	407011	433859	521524	487689	644829	469506	581961	541426	504606	925805	622877	655541	613712	1.03018e+06	341054	204227	678117	639209	473747	256026	373201	469281	333660	981153	323069	321850
15635270	580	para-Benzoquinone dioxime	C6H6N2O2	None	None	332647	289026	573351	448797	919710	787672	3.50477e+06	329177	511074	442150	448098	398340	482614	418410	525194	322598	366001	430280	407011	433859	521524	487689	644829	469506	581961	541426	504606	925805	622877	655541	613712	1.03018e+06	341054	204227	678117	639209	473747	256026	373201	469281	333660	981153	323069	321850
15635272	580	4-Nitroaniline	C6H6N2O2	None	None	332647	289026	573351	448797	919710	787672	3.50477e+06	329177	511074	442150	448098	398340	482614	418410	525194	322598	366001	430280	407011	433859	521524	487689	644829	469506	581961	541426	504606	925805	622877	655541	613712	1.03018e+06	341054	204227	678117	639209	473747	256026	373201	469281	333660	981153	323069	321850
15635378	602	PC(P-18:1(11Z)/16:1(9Z))	C42H80NO7P	None	None	2.80159e+06	2.92676e+06	3.01035e+06	2.21021e+06	1.99808e+06	1.49367e+06	2.43255e+06	717970	2.32138e+06	2851316	3.03409e+06	1.35285e+06	2736405	2.07219e+06	553843	2393780	610847	2.23298e+06	1292138	2.48663e+06	636537	1.89222e+06	627344	905046	2.01005e+06	1.73424e+06	1.51319e+06	1.22156e+06	334652	894188	1398029	1.77587e+06	2.17963e+06	3235893	2.16195e+06	1.58695e+06	1.20206e+06	3.03018e+06	2.00181e+06	2.15948e+06	1.71319e+06	2.75449e+06	2.18437e+06	1.19884e+06
15635379	602	PC(P-16:0/18:2(9Z,12Z))	C42H80NO7P	None	None	2.80159e+06	2.92676e+06	3.01035e+06	2.21021e+06	1.99808e+06	1.49367e+06	2.43255e+06	717970	2.32138e+06	2851316	3.03409e+06	1.35285e+06	2736405	2.07219e+06	553843	2393780	610847	2.23298e+06	1292138	2.48663e+06	636537	1.89222e+06	627344	905046	2.01005e+06	1.73424e+06	1.51319e+06	1.22156e+06	334652	894188	1398029	1.77587e+06	2.17963e+06	3235893	2.16195e+06	1.58695e+06	1.20206e+06	3.03018e+06	2.00181e+06	2.15948e+06	1.71319e+06	2.75449e+06	2.18437e+06	1.19884e+06
15635380	602	PC(P-18:1(9Z)/16:1(9Z))	C42H80NO7P	None	None	2.80159e+06	2.92676e+06	3.01035e+06	2.21021e+06	1.99808e+06	1.49367e+06	2.43255e+06	717970	2.32138e+06	2851316	3.03409e+06	1.35285e+06	2736405	2.07219e+06	553843	2393780	610847	2.23298e+06	1292138	2.48663e+06	636537	1.89222e+06	627344	905046	2.01005e+06	1.73424e+06	1.51319e+06	1.22156e+06	334652	894188	1398029	1.77587e+06	2.17963e+06	3235893	2.16195e+06	1.58695e+06	1.20206e+06	3.03018e+06	2.00181e+06	2.15948e+06	1.71319e+06	2.75449e+06	2.18437e+06	1.19884e+06
15635381	602	PC(16:1(9Z)/P-18:1(9Z))	C42H80NO7P	None	None	2.80159e+06	2.92676e+06	3.01035e+06	2.21021e+06	1.99808e+06	1.49367e+06	2.43255e+06	717970	2.32138e+06	2851316	3.03409e+06	1.35285e+06	2736405	2.07219e+06	553843	2393780	610847	2.23298e+06	1292138	2.48663e+06	636537	1.89222e+06	627344	905046	2.01005e+06	1.73424e+06	1.51319e+06	1.22156e+06	334652	894188	1398029	1.77587e+06	2.17963e+06	3235893	2.16195e+06	1.58695e+06	1.20206e+06	3.03018e+06	2.00181e+06	2.15948e+06	1.71319e+06	2.75449e+06	2.18437e+06	1.19884e+06
15635382	602	PC(16:1(9Z)/P-18:1(11Z))	C42H80NO7P	None	None	2.80159e+06	2.92676e+06	3.01035e+06	2.21021e+06	1.99808e+06	1.49367e+06	2.43255e+06	717970	2.32138e+06	2851316	3.03409e+06	1.35285e+06	2736405	2.07219e+06	553843	2393780	610847	2.23298e+06	1292138	2.48663e+06	636537	1.89222e+06	627344	905046	2.01005e+06	1.73424e+06	1.51319e+06	1.22156e+06	334652	894188	1398029	1.77587e+06	2.17963e+06	3235893	2.16195e+06	1.58695e+06	1.20206e+06	3.03018e+06	2.00181e+06	2.15948e+06	1.71319e+06	2.75449e+06	2.18437e+06	1.19884e+06
15635383	602	PC(18:2(9Z,12Z)/P-16:0)	C42H80NO7P	None	None	2.80159e+06	2.92676e+06	3.01035e+06	2.21021e+06	1.99808e+06	1.49367e+06	2.43255e+06	717970	2.32138e+06	2851316	3.03409e+06	1.35285e+06	2736405	2.07219e+06	553843	2393780	610847	2.23298e+06	1292138	2.48663e+06	636537	1.89222e+06	627344	905046	2.01005e+06	1.73424e+06	1.51319e+06	1.22156e+06	334652	894188	1398029	1.77587e+06	2.17963e+06	3235893	2.16195e+06	1.58695e+06	1.20206e+06	3.03018e+06	2.00181e+06	2.15948e+06	1.71319e+06	2.75449e+06	2.18437e+06	1.19884e+06
15635384	602	PC(O-16:1(9Z)/18:2(9Z,12Z))	C42H80NO7P	None	None	2.80159e+06	2.92676e+06	3.01035e+06	2.21021e+06	1.99808e+06	1.49367e+06	2.43255e+06	717970	2.32138e+06	2851316	3.03409e+06	1.35285e+06	2736405	2.07219e+06	553843	2393780	610847	2.23298e+06	1292138	2.48663e+06	636537	1.89222e+06	627344	905046	2.01005e+06	1.73424e+06	1.51319e+06	1.22156e+06	334652	894188	1398029	1.77587e+06	2.17963e+06	3235893	2.16195e+06	1.58695e+06	1.20206e+06	3.03018e+06	2.00181e+06	2.15948e+06	1.71319e+06	2.75449e+06	2.18437e+06	1.19884e+06
15635385	602	PC(16:1(9Z)/P-18:1(9Z))	C42H80NO7P	None	None	2.80159e+06	2.92676e+06	3.01035e+06	2.21021e+06	1.99808e+06	1.49367e+06	2.43255e+06	717970	2.32138e+06	2851316	3.03409e+06	1.35285e+06	2736405	2.07219e+06	553843	2393780	610847	2.23298e+06	1292138	2.48663e+06	636537	1.89222e+06	627344	905046	2.01005e+06	1.73424e+06	1.51319e+06	1.22156e+06	334652	894188	1398029	1.77587e+06	2.17963e+06	3235893	2.16195e+06	1.58695e+06	1.20206e+06	3.03018e+06	2.00181e+06	2.15948e+06	1.71319e+06	2.75449e+06	2.18437e+06	1.19884e+06
15635386	602	PC(16:1(9Z)/P-18:1(11Z))	C42H80NO7P	None	None	2.80159e+06	2.92676e+06	3.01035e+06	2.21021e+06	1.99808e+06	1.49367e+06	2.43255e+06	717970	2.32138e+06	2851316	3.03409e+06	1.35285e+06	2736405	2.07219e+06	553843	2393780	610847	2.23298e+06	1292138	2.48663e+06	636537	1.89222e+06	627344	905046	2.01005e+06	1.73424e+06	1.51319e+06	1.22156e+06	334652	894188	1398029	1.77587e+06	2.17963e+06	3235893	2.16195e+06	1.58695e+06	1.20206e+06	3.03018e+06	2.00181e+06	2.15948e+06	1.71319e+06	2.75449e+06	2.18437e+06	1.19884e+06
15635392	602	PC(O-16:0/18:3(9Z,12Z,15Z))	C42H80NO7P	None	None	2.80159e+06	2.92676e+06	3.01035e+06	2.21021e+06	1.99808e+06	1.49367e+06	2.43255e+06	717970	2.32138e+06	2851316	3.03409e+06	1.35285e+06	2736405	2.07219e+06	553843	2393780	610847	2.23298e+06	1292138	2.48663e+06	636537	1.89222e+06	627344	905046	2.01005e+06	1.73424e+06	1.51319e+06	1.22156e+06	334652	894188	1398029	1.77587e+06	2.17963e+06	3235893	2.16195e+06	1.58695e+06	1.20206e+06	3.03018e+06	2.00181e+06	2.15948e+06	1.71319e+06	2.75449e+06	2.18437e+06	1.19884e+06
15635393	602	PC(O-16:0/18:3(6Z,9Z,12Z))	C42H80NO7P	None	None	2.80159e+06	2.92676e+06	3.01035e+06	2.21021e+06	1.99808e+06	1.49367e+06	2.43255e+06	717970	2.32138e+06	2851316	3.03409e+06	1.35285e+06	2736405	2.07219e+06	553843	2393780	610847	2.23298e+06	1292138	2.48663e+06	636537	1.89222e+06	627344	905046	2.01005e+06	1.73424e+06	1.51319e+06	1.22156e+06	334652	894188	1398029	1.77587e+06	2.17963e+06	3235893	2.16195e+06	1.58695e+06	1.20206e+06	3.03018e+06	2.00181e+06	2.15948e+06	1.71319e+06	2.75449e+06	2.18437e+06	1.19884e+06
15635396	602	PE(P-20:0/17:2(9Z,12Z))	C42H80NO7P	None	None	2.80159e+06	2.92676e+06	3.01035e+06	2.21021e+06	1.99808e+06	1.49367e+06	2.43255e+06	717970	2.32138e+06	2851316	3.03409e+06	1.35285e+06	2736405	2.07219e+06	553843	2393780	610847	2.23298e+06	1292138	2.48663e+06	636537	1.89222e+06	627344	905046	2.01005e+06	1.73424e+06	1.51319e+06	1.22156e+06	334652	894188	1398029	1.77587e+06	2.17963e+06	3235893	2.16195e+06	1.58695e+06	1.20206e+06	3.03018e+06	2.00181e+06	2.15948e+06	1.71319e+06	2.75449e+06	2.18437e+06	1.19884e+06
15635666	609	2,3-Dihydro-5,5',7,7'-tetrahydroxy-2-(4-hydroxyphenyl)[3,8'-bi-4H-1-benzopyran]-4,4'-dione	C24H16O9	None	None	53499.2	47366.9	28248	32632.3	57713.1	15982.5	62036.9	43402.4	45384.7	54471.6	42324.8	25608.9	43659	54862.5	77699.8	58737	50559.8	52515.7	29013	35097.9	65065.1	34849.4	78432.6	78509	34536.9	33501.1	34973.7	73479	0	16582.1	34561.8	41044.9	28390.6	31730.7	31455.7	31593.2	17671	33166.3	42919.8	24894.8	30800.9	32753.9	46281.6	53672.3
15635674	663	PC(20:3(8Z,11Z,14Z)/18:2(9Z,12Z))	C46H82NO8P	None	None	267847	260275	393747	336116	312850	222248	217440	206845	264061	354374	245541	230077	235594	357322	337598	275191	207022	260366	131355	169809	131107	187298	221917	217946	243504	300543	202622	188024	164060	242910	211634	380500	249883	269415	291745	246396	511028	346366	313611	239162	318964	367570	317045	348699
15635675	663	PC(20:2(11Z,14Z)/18:3(9Z,12Z,15Z))	C46H82NO8P	None	None	267847	260275	393747	336116	312850	222248	217440	206845	264061	354374	245541	230077	235594	357322	337598	275191	207022	260366	131355	169809	131107	187298	221917	217946	243504	300543	202622	188024	164060	242910	211634	380500	249883	269415	291745	246396	511028	346366	313611	239162	318964	367570	317045	348699
15635676	663	PC(20:2(11Z,14Z)/18:3(6Z,9Z,12Z))	C46H82NO8P	None	None	267847	260275	393747	336116	312850	222248	217440	206845	264061	354374	245541	230077	235594	357322	337598	275191	207022	260366	131355	169809	131107	187298	221917	217946	243504	300543	202622	188024	164060	242910	211634	380500	249883	269415	291745	246396	511028	346366	313611	239162	318964	367570	317045	348699
15635678	663	PC(20:1(11Z)/18:4(6Z,9Z,12Z,15Z))	C46H82NO8P	None	None	267847	260275	393747	336116	312850	222248	217440	206845	264061	354374	245541	230077	235594	357322	337598	275191	207022	260366	131355	169809	131107	187298	221917	217946	243504	300543	202622	188024	164060	242910	211634	380500	249883	269415	291745	246396	511028	346366	313611	239162	318964	367570	317045	348699
15635679	663	PC(20:3(5Z,8Z,11Z)/18:2(9Z,12Z))	C46H82NO8P	None	None	267847	260275	393747	336116	312850	222248	217440	206845	264061	354374	245541	230077	235594	357322	337598	275191	207022	260366	131355	169809	131107	187298	221917	217946	243504	300543	202622	188024	164060	242910	211634	380500	249883	269415	291745	246396	511028	346366	313611	239162	318964	367570	317045	348699
15635680	663	PC(20:4(5Z,8Z,11Z,14Z)/18:1(9Z))	C46H82NO8P	None	None	267847	260275	393747	336116	312850	222248	217440	206845	264061	354374	245541	230077	235594	357322	337598	275191	207022	260366	131355	169809	131107	187298	221917	217946	243504	300543	202622	188024	164060	242910	211634	380500	249883	269415	291745	246396	511028	346366	313611	239162	318964	367570	317045	348699
15635681	663	PC(20:4(5Z,8Z,11Z,14Z)/18:1(11Z))	C46H82NO8P	None	None	267847	260275	393747	336116	312850	222248	217440	206845	264061	354374	245541	230077	235594	357322	337598	275191	207022	260366	131355	169809	131107	187298	221917	217946	243504	300543	202622	188024	164060	242910	211634	380500	249883	269415	291745	246396	511028	346366	313611	239162	318964	367570	317045	348699
15635682	663	PC(20:5(5Z,8Z,11Z,14Z,17Z)/18:0)	C46H82NO8P	None	None	267847	260275	393747	336116	312850	222248	217440	206845	264061	354374	245541	230077	235594	357322	337598	275191	207022	260366	131355	169809	131107	187298	221917	217946	243504	300543	202622	188024	164060	242910	211634	380500	249883	269415	291745	246396	511028	346366	313611	239162	318964	367570	317045	348699
15635683	663	PC(20:4(8Z,11Z,14Z,17Z)/18:1(9Z))	C46H82NO8P	None	None	267847	260275	393747	336116	312850	222248	217440	206845	264061	354374	245541	230077	235594	357322	337598	275191	207022	260366	131355	169809	131107	187298	221917	217946	243504	300543	202622	188024	164060	242910	211634	380500	249883	269415	291745	246396	511028	346366	313611	239162	318964	367570	317045	348699
15635684	663	PC(20:4(8Z,11Z,14Z,17Z)/18:1(11Z))	C46H82NO8P	None	None	267847	260275	393747	336116	312850	222248	217440	206845	264061	354374	245541	230077	235594	357322	337598	275191	207022	260366	131355	169809	131107	187298	221917	217946	243504	300543	202622	188024	164060	242910	211634	380500	249883	269415	291745	246396	511028	346366	313611	239162	318964	367570	317045	348699
15635685	663	PC(22:5(4Z,7Z,10Z,13Z,16Z)/16:0)	C46H82NO8P	None	None	267847	260275	393747	336116	312850	222248	217440	206845	264061	354374	245541	230077	235594	357322	337598	275191	207022	260366	131355	169809	131107	187298	221917	217946	243504	300543	202622	188024	164060	242910	211634	380500	249883	269415	291745	246396	511028	346366	313611	239162	318964	367570	317045	348699
15635686	663	PC(22:4(7Z,10Z,13Z,16Z)/16:1(9Z))	C46H82NO8P	None	None	267847	260275	393747	336116	312850	222248	217440	206845	264061	354374	245541	230077	235594	357322	337598	275191	207022	260366	131355	169809	131107	187298	221917	217946	243504	300543	202622	188024	164060	242910	211634	380500	249883	269415	291745	246396	511028	346366	313611	239162	318964	367570	317045	348699
15635689	663	PC(22:5(7Z,10Z,13Z,16Z,19Z)/16:0)	C46H82NO8P	None	None	267847	260275	393747	336116	312850	222248	217440	206845	264061	354374	245541	230077	235594	357322	337598	275191	207022	260366	131355	169809	131107	187298	221917	217946	243504	300543	202622	188024	164060	242910	211634	380500	249883	269415	291745	246396	511028	346366	313611	239162	318964	367570	317045	348699
15635691	663	PC(18:0/20:5(5Z,8Z,11Z,14Z,17Z))	C46H82NO8P	None	None	267847	260275	393747	336116	312850	222248	217440	206845	264061	354374	245541	230077	235594	357322	337598	275191	207022	260366	131355	169809	131107	187298	221917	217946	243504	300543	202622	188024	164060	242910	211634	380500	249883	269415	291745	246396	511028	346366	313611	239162	318964	367570	317045	348699
15635693	663	PC(16:1(9Z)/22:4(7Z,10Z,13Z,16Z))	C46H82NO8P	None	None	267847	260275	393747	336116	312850	222248	217440	206845	264061	354374	245541	230077	235594	357322	337598	275191	207022	260366	131355	169809	131107	187298	221917	217946	243504	300543	202622	188024	164060	242910	211634	380500	249883	269415	291745	246396	511028	346366	313611	239162	318964	367570	317045	348699
15635694	663	PC(18:1(11Z)/20:4(8Z,11Z,14Z,17Z))	C46H82NO8P	None	None	267847	260275	393747	336116	312850	222248	217440	206845	264061	354374	245541	230077	235594	357322	337598	275191	207022	260366	131355	169809	131107	187298	221917	217946	243504	300543	202622	188024	164060	242910	211634	380500	249883	269415	291745	246396	511028	346366	313611	239162	318964	367570	317045	348699
15635695	663	PC(18:1(11Z)/20:4(5Z,8Z,11Z,14Z))	C46H82NO8P	None	None	267847	260275	393747	336116	312850	222248	217440	206845	264061	354374	245541	230077	235594	357322	337598	275191	207022	260366	131355	169809	131107	187298	221917	217946	243504	300543	202622	188024	164060	242910	211634	380500	249883	269415	291745	246396	511028	346366	313611	239162	318964	367570	317045	348699
15635698	663	PC(18:2(9Z,12Z)/20:3(5Z,8Z,11Z))	C46H82NO8P	None	None	267847	260275	393747	336116	312850	222248	217440	206845	264061	354374	245541	230077	235594	357322	337598	275191	207022	260366	131355	169809	131107	187298	221917	217946	243504	300543	202622	188024	164060	242910	211634	380500	249883	269415	291745	246396	511028	346366	313611	239162	318964	367570	317045	348699
15635700	663	PC(18:1(9Z)/20:4(8Z,11Z,14Z,17Z))	C46H82NO8P	None	None	267847	260275	393747	336116	312850	222248	217440	206845	264061	354374	245541	230077	235594	357322	337598	275191	207022	260366	131355	169809	131107	187298	221917	217946	243504	300543	202622	188024	164060	242910	211634	380500	249883	269415	291745	246396	511028	346366	313611	239162	318964	367570	317045	348699
15635701	663	PC(18:1(9Z)/20:4(5Z,8Z,11Z,14Z))	C46H82NO8P	None	None	267847	260275	393747	336116	312850	222248	217440	206845	264061	354374	245541	230077	235594	357322	337598	275191	207022	260366	131355	169809	131107	187298	221917	217946	243504	300543	202622	188024	164060	242910	211634	380500	249883	269415	291745	246396	511028	346366	313611	239162	318964	367570	317045	348699
15635703	663	PC(18:3(6Z,9Z,12Z)/20:2(11Z,14Z))	C46H82NO8P	None	None	267847	260275	393747	336116	312850	222248	217440	206845	264061	354374	245541	230077	235594	357322	337598	275191	207022	260366	131355	169809	131107	187298	221917	217946	243504	300543	202622	188024	164060	242910	211634	380500	249883	269415	291745	246396	511028	346366	313611	239162	318964	367570	317045	348699
15635704	663	PC(18:2(9Z,12Z)/20:3(8Z,11Z,14Z))	C46H82NO8P	None	None	267847	260275	393747	336116	312850	222248	217440	206845	264061	354374	245541	230077	235594	357322	337598	275191	207022	260366	131355	169809	131107	187298	221917	217946	243504	300543	202622	188024	164060	242910	211634	380500	249883	269415	291745	246396	511028	346366	313611	239162	318964	367570	317045	348699
15635705	663	PC(18:3(9Z,12Z,15Z)/20:2(11Z,14Z))	C46H82NO8P	None	None	267847	260275	393747	336116	312850	222248	217440	206845	264061	354374	245541	230077	235594	357322	337598	275191	207022	260366	131355	169809	131107	187298	221917	217946	243504	300543	202622	188024	164060	242910	211634	380500	249883	269415	291745	246396	511028	346366	313611	239162	318964	367570	317045	348699
15635706	663	PC(18:4(6Z,9Z,12Z,15Z)/20:1(11Z))	C46H82NO8P	None	None	267847	260275	393747	336116	312850	222248	217440	206845	264061	354374	245541	230077	235594	357322	337598	275191	207022	260366	131355	169809	131107	187298	221917	217946	243504	300543	202622	188024	164060	242910	211634	380500	249883	269415	291745	246396	511028	346366	313611	239162	318964	367570	317045	348699
15635710	663	PC(16:0/22:5(7Z,10Z,13Z,16Z,19Z))	C46H82NO8P	None	None	267847	260275	393747	336116	312850	222248	217440	206845	264061	354374	245541	230077	235594	357322	337598	275191	207022	260366	131355	169809	131107	187298	221917	217946	243504	300543	202622	188024	164060	242910	211634	380500	249883	269415	291745	246396	511028	346366	313611	239162	318964	367570	317045	348699
15635711	663	PC(16:0/22:5(4Z,7Z,10Z,13Z,16Z))	C46H82NO8P	None	None	267847	260275	393747	336116	312850	222248	217440	206845	264061	354374	245541	230077	235594	357322	337598	275191	207022	260366	131355	169809	131107	187298	221917	217946	243504	300543	202622	188024	164060	242910	211634	380500	249883	269415	291745	246396	511028	346366	313611	239162	318964	367570	317045	348699
15635729	663	PE(22:4(7Z,10Z,13Z,16Z)/19:1(9Z))	C46H82NO8P	None	None	267847	260275	393747	336116	312850	222248	217440	206845	264061	354374	245541	230077	235594	357322	337598	275191	207022	260366	131355	169809	131107	187298	221917	217946	243504	300543	202622	188024	164060	242910	211634	380500	249883	269415	291745	246396	511028	346366	313611	239162	318964	367570	317045	348699
15635732	663	PE(21:0/20:5(5Z,8Z,11Z,14Z,17Z))	C46H82NO8P	None	None	267847	260275	393747	336116	312850	222248	217440	206845	264061	354374	245541	230077	235594	357322	337598	275191	207022	260366	131355	169809	131107	187298	221917	217946	243504	300543	202622	188024	164060	242910	211634	380500	249883	269415	291745	246396	511028	346366	313611	239162	318964	367570	317045	348699
15635735	663	PC(18:0/20:5(9Z,11Z,13Z,15Z,17Z))	C46H82NO8P	None	None	267847	260275	393747	336116	312850	222248	217440	206845	264061	354374	245541	230077	235594	357322	337598	275191	207022	260366	131355	169809	131107	187298	221917	217946	243504	300543	202622	188024	164060	242910	211634	380500	249883	269415	291745	246396	511028	346366	313611	239162	318964	367570	317045	348699
15635767	663	PE(19:1(9Z)/22:4(7Z,10Z,13Z,16Z))	C46H82NO8P	None	None	267847	260275	393747	336116	312850	222248	217440	206845	264061	354374	245541	230077	235594	357322	337598	275191	207022	260366	131355	169809	131107	187298	221917	217946	243504	300543	202622	188024	164060	242910	211634	380500	249883	269415	291745	246396	511028	346366	313611	239162	318964	367570	317045	348699
15635770	663	PE(20:5(5Z,8Z,11Z,14Z,17Z)/21:0)	C46H82NO8P	None	None	267847	260275	393747	336116	312850	222248	217440	206845	264061	354374	245541	230077	235594	357322	337598	275191	207022	260366	131355	169809	131107	187298	221917	217946	243504	300543	202622	188024	164060	242910	211634	380500	249883	269415	291745	246396	511028	346366	313611	239162	318964	367570	317045	348699
15635778	665	7-oxo-8-amino-nonanoic acid	C9H17NO3	Metabolism; Metabolism of cofactors and vitamins	Biotin metabolism	92966.4	71678.1	168745	81548.9	95729	121444	91167.8	81516.1	92067.1	110888	106464	95723.9	97015.3	71609.8	97001.2	131988	73065.7	97008.3	128398	88089.6	88306.8	72198.2	99672	104431	130206	207144	102051	76667.4	142576	76637.6	91819.7	111306	91674.8	83742.1	77450.1	87708.4	72968	65928.5	65721.7	73681	70467.6	89129.7	74570.6	65387.2
15635779	665	N-Heptanoylglycine	C9H17NO3	None	None	92966.4	71678.1	168745	81548.9	95729	121444	91167.8	81516.1	92067.1	110888	106464	95723.9	97015.3	71609.8	97001.2	131988	73065.7	97008.3	128398	88089.6	88306.8	72198.2	99672	104431	130206	207144	102051	76667.4	142576	76637.6	91819.7	111306	91674.8	83742.1	77450.1	87708.4	72968	65928.5	65721.7	73681	70467.6	89129.7	74570.6	65387.2
15635780	665	(E)-2-Butenyl-4-methyl-threonine	C9H17NO3	None	None	92966.4	71678.1	168745	81548.9	95729	121444	91167.8	81516.1	92067.1	110888	106464	95723.9	97015.3	71609.8	97001.2	131988	73065.7	97008.3	128398	88089.6	88306.8	72198.2	99672	104431	130206	207144	102051	76667.4	142576	76637.6	91819.7	111306	91674.8	83742.1	77450.1	87708.4	72968	65928.5	65721.7	73681	70467.6	89129.7	74570.6	65387.2
15635799	668	2E,6E-Octadienal	C8H12O	None	None	66210.1	65928.4	68583.8	74366.1	53394.4	58614.9	62523.1	57157.2	64225.8	92177.1	92841.7	89353	67746.6	52915.6	71072.1	56821.6	41259.8	69409.3	82205.1	82058.4	60324.1	52494.2	66893.9	62278	74237	108083	70565.4	42472.4	59993.6	48520.4	49293.5	85811.3	62400.3	59024.6	52621.7	55823.1	64746.9	45972.4	44257.7	62269.9	47362	77484.9	51489.3	62208.8
15635800	668	3,5,5-Trimethyl-2-cyclopenten-1-one	C8H12O	None	None	66210.1	65928.4	68583.8	74366.1	53394.4	58614.9	62523.1	57157.2	64225.8	92177.1	92841.7	89353	67746.6	52915.6	71072.1	56821.6	41259.8	69409.3	82205.1	82058.4	60324.1	52494.2	66893.9	62278	74237	108083	70565.4	42472.4	59993.6	48520.4	49293.5	85811.3	62400.3	59024.6	52621.7	55823.1	64746.9	45972.4	44257.7	62269.9	47362	77484.9	51489.3	62208.8
15635801	668	2-Butylfuran	C8H12O	None	None	66210.1	65928.4	68583.8	74366.1	53394.4	58614.9	62523.1	57157.2	64225.8	92177.1	92841.7	89353	67746.6	52915.6	71072.1	56821.6	41259.8	69409.3	82205.1	82058.4	60324.1	52494.2	66893.9	62278	74237	108083	70565.4	42472.4	59993.6	48520.4	49293.5	85811.3	62400.3	59024.6	52621.7	55823.1	64746.9	45972.4	44257.7	62269.9	47362	77484.9	51489.3	62208.8
15635802	668	Methyl-1-cyclopenten-1-yl)-ethanone	C8H12O	None	None	66210.1	65928.4	68583.8	74366.1	53394.4	58614.9	62523.1	57157.2	64225.8	92177.1	92841.7	89353	67746.6	52915.6	71072.1	56821.6	41259.8	69409.3	82205.1	82058.4	60324.1	52494.2	66893.9	62278	74237	108083	70565.4	42472.4	59993.6	48520.4	49293.5	85811.3	62400.3	59024.6	52621.7	55823.1	64746.9	45972.4	44257.7	62269.9	47362	77484.9	51489.3	62208.8
15635803	668	6-Methyl-3,5-heptadien-2-one	C8H12O	None	None	66210.1	65928.4	68583.8	74366.1	53394.4	58614.9	62523.1	57157.2	64225.8	92177.1	92841.7	89353	67746.6	52915.6	71072.1	56821.6	41259.8	69409.3	82205.1	82058.4	60324.1	52494.2	66893.9	62278	74237	108083	70565.4	42472.4	59993.6	48520.4	49293.5	85811.3	62400.3	59024.6	52621.7	55823.1	64746.9	45972.4	44257.7	62269.9	47362	77484.9	51489.3	62208.8
15635804	668	2,4-octadienal	C8H12O	None	None	66210.1	65928.4	68583.8	74366.1	53394.4	58614.9	62523.1	57157.2	64225.8	92177.1	92841.7	89353	67746.6	52915.6	71072.1	56821.6	41259.8	69409.3	82205.1	82058.4	60324.1	52494.2	66893.9	62278	74237	108083	70565.4	42472.4	59993.6	48520.4	49293.5	85811.3	62400.3	59024.6	52621.7	55823.1	64746.9	45972.4	44257.7	62269.9	47362	77484.9	51489.3	62208.8
15635805	668	2,3-Dimethyl-2-cyclohexen-1-one	C8H12O	None	None	66210.1	65928.4	68583.8	74366.1	53394.4	58614.9	62523.1	57157.2	64225.8	92177.1	92841.7	89353	67746.6	52915.6	71072.1	56821.6	41259.8	69409.3	82205.1	82058.4	60324.1	52494.2	66893.9	62278	74237	108083	70565.4	42472.4	59993.6	48520.4	49293.5	85811.3	62400.3	59024.6	52621.7	55823.1	64746.9	45972.4	44257.7	62269.9	47362	77484.9	51489.3	62208.8
15635806	668	2-Isopropyl-5-methylfuran	C8H12O	None	None	66210.1	65928.4	68583.8	74366.1	53394.4	58614.9	62523.1	57157.2	64225.8	92177.1	92841.7	89353	67746.6	52915.6	71072.1	56821.6	41259.8	69409.3	82205.1	82058.4	60324.1	52494.2	66893.9	62278	74237	108083	70565.4	42472.4	59993.6	48520.4	49293.5	85811.3	62400.3	59024.6	52621.7	55823.1	64746.9	45972.4	44257.7	62269.9	47362	77484.9	51489.3	62208.8
15635807	668	1,5-Octadien-3-one	C8H12O	None	None	66210.1	65928.4	68583.8	74366.1	53394.4	58614.9	62523.1	57157.2	64225.8	92177.1	92841.7	89353	67746.6	52915.6	71072.1	56821.6	41259.8	69409.3	82205.1	82058.4	60324.1	52494.2	66893.9	62278	74237	108083	70565.4	42472.4	59993.6	48520.4	49293.5	85811.3	62400.3	59024.6	52621.7	55823.1	64746.9	45972.4	44257.7	62269.9	47362	77484.9	51489.3	62208.8
15635808	668	trans, trans-3,5-Octadien-2-one	C8H12O	None	None	66210.1	65928.4	68583.8	74366.1	53394.4	58614.9	62523.1	57157.2	64225.8	92177.1	92841.7	89353	67746.6	52915.6	71072.1	56821.6	41259.8	69409.3	82205.1	82058.4	60324.1	52494.2	66893.9	62278	74237	108083	70565.4	42472.4	59993.6	48520.4	49293.5	85811.3	62400.3	59024.6	52621.7	55823.1	64746.9	45972.4	44257.7	62269.9	47362	77484.9	51489.3	62208.8
15635809	668	2E,4Z-Octadienal	C8H12O	None	None	66210.1	65928.4	68583.8	74366.1	53394.4	58614.9	62523.1	57157.2	64225.8	92177.1	92841.7	89353	67746.6	52915.6	71072.1	56821.6	41259.8	69409.3	82205.1	82058.4	60324.1	52494.2	66893.9	62278	74237	108083	70565.4	42472.4	59993.6	48520.4	49293.5	85811.3	62400.3	59024.6	52621.7	55823.1	64746.9	45972.4	44257.7	62269.9	47362	77484.9	51489.3	62208.8
15635810	668	2E,6Z-Octadienal	C8H12O	None	None	66210.1	65928.4	68583.8	74366.1	53394.4	58614.9	62523.1	57157.2	64225.8	92177.1	92841.7	89353	67746.6	52915.6	71072.1	56821.6	41259.8	69409.3	82205.1	82058.4	60324.1	52494.2	66893.9	62278	74237	108083	70565.4	42472.4	59993.6	48520.4	49293.5	85811.3	62400.3	59024.6	52621.7	55823.1	64746.9	45972.4	44257.7	62269.9	47362	77484.9	51489.3	62208.8
15635811	668	2E,7-Octadienal	C8H12O	None	None	66210.1	65928.4	68583.8	74366.1	53394.4	58614.9	62523.1	57157.2	64225.8	92177.1	92841.7	89353	67746.6	52915.6	71072.1	56821.6	41259.8	69409.3	82205.1	82058.4	60324.1	52494.2	66893.9	62278	74237	108083	70565.4	42472.4	59993.6	48520.4	49293.5	85811.3	62400.3	59024.6	52621.7	55823.1	64746.9	45972.4	44257.7	62269.9	47362	77484.9	51489.3	62208.8
15635812	668	2,4-Dimethyl-2E,4E-hexadienal	C8H12O	None	None	66210.1	65928.4	68583.8	74366.1	53394.4	58614.9	62523.1	57157.2	64225.8	92177.1	92841.7	89353	67746.6	52915.6	71072.1	56821.6	41259.8	69409.3	82205.1	82058.4	60324.1	52494.2	66893.9	62278	74237	108083	70565.4	42472.4	59993.6	48520.4	49293.5	85811.3	62400.3	59024.6	52621.7	55823.1	64746.9	45972.4	44257.7	62269.9	47362	77484.9	51489.3	62208.8
15635813	668	5,7-octadienal	C8H12O	None	None	66210.1	65928.4	68583.8	74366.1	53394.4	58614.9	62523.1	57157.2	64225.8	92177.1	92841.7	89353	67746.6	52915.6	71072.1	56821.6	41259.8	69409.3	82205.1	82058.4	60324.1	52494.2	66893.9	62278	74237	108083	70565.4	42472.4	59993.6	48520.4	49293.5	85811.3	62400.3	59024.6	52621.7	55823.1	64746.9	45972.4	44257.7	62269.9	47362	77484.9	51489.3	62208.8
15635814	668	6-Methyl-3E,5-heptadien-2-one	C8H12O	None	None	66210.1	65928.4	68583.8	74366.1	53394.4	58614.9	62523.1	57157.2	64225.8	92177.1	92841.7	89353	67746.6	52915.6	71072.1	56821.6	41259.8	69409.3	82205.1	82058.4	60324.1	52494.2	66893.9	62278	74237	108083	70565.4	42472.4	59993.6	48520.4	49293.5	85811.3	62400.3	59024.6	52621.7	55823.1	64746.9	45972.4	44257.7	62269.9	47362	77484.9	51489.3	62208.8
15635830	670	Terbutaline	C12H19NO3	None	None	37826.8	25611	57377.8	34592.4	28769.8	51312.3	44484.2	33422.3	36209.6	52285.6	34199.7	43787.3	37949.9	25206	26234.4	51287.4	21789.8	36074.8	40266.3	23769	36925	24902.5	23702	46918	35746.5	101600	36335.8	31046	27794.3	19214.5	38853.2	76681.1	36092.1	25780.2	50981.8	33569	40955.6	19844.1	50356.7	67390.6	64583.1	59304.3	36465.6	33970.8
15635833	670	Prenalterol	C12H19NO3	None	None	37826.8	25611	57377.8	34592.4	28769.8	51312.3	44484.2	33422.3	36209.6	52285.6	34199.7	43787.3	37949.9	25206	26234.4	51287.4	21789.8	36074.8	40266.3	23769	36925	24902.5	23702	46918	35746.5	101600	36335.8	31046	27794.3	19214.5	38853.2	76681.1	36092.1	25780.2	50981.8	33569	40955.6	19844.1	50356.7	67390.6	64583.1	59304.3	36465.6	33970.8
15635838	670	N-Methylmescaline	C12H19NO3	None	None	37826.8	25611	57377.8	34592.4	28769.8	51312.3	44484.2	33422.3	36209.6	52285.6	34199.7	43787.3	37949.9	25206	26234.4	51287.4	21789.8	36074.8	40266.3	23769	36925	24902.5	23702	46918	35746.5	101600	36335.8	31046	27794.3	19214.5	38853.2	76681.1	36092.1	25780.2	50981.8	33569	40955.6	19844.1	50356.7	67390.6	64583.1	59304.3	36465.6	33970.8
15635847	671	Pseudopelletierine	C9H15NO	Metabolism; Biosynthesis of other secondary metabolites	Tropane, piperidine and pyridine alkaloid biosynthesis	43484.5	85823.5	70556.6	62282.7	31695.5	46664.1	46442.7	35796.4	46553.4	82530	55471.1	55631.5	55233.3	41342	50451.1	67956.7	43983.7	55352.2	55302	54043.7	47325.3	35426.1	38532.8	42997.4	54721	79016.4	50684.5	51867.7	38978.3	64358.1	43211.6	39132.1	48669	44666	60231.2	46667.5	66017.8	38661.4	44074.6	47100.6	66071.7	54802.8	45979.9	64573
15635860	671	5-Butyl-2-ethyloxazole	C9H15NO	None	None	43484.5	85823.5	70556.6	62282.7	31695.5	46664.1	46442.7	35796.4	46553.4	82530	55471.1	55631.5	55233.3	41342	50451.1	67956.7	43983.7	55352.2	55302	54043.7	47325.3	35426.1	38532.8	42997.4	54721	79016.4	50684.5	51867.7	38978.3	64358.1	43211.6	39132.1	48669	44666	60231.2	46667.5	66017.8	38661.4	44074.6	47100.6	66071.7	54802.8	45979.9	64573
15635861	671	4-Methyl-2-pentyloxazole	C9H15NO	None	None	43484.5	85823.5	70556.6	62282.7	31695.5	46664.1	46442.7	35796.4	46553.4	82530	55471.1	55631.5	55233.3	41342	50451.1	67956.7	43983.7	55352.2	55302	54043.7	47325.3	35426.1	38532.8	42997.4	54721	79016.4	50684.5	51867.7	38978.3	64358.1	43211.6	39132.1	48669	44666	60231.2	46667.5	66017.8	38661.4	44074.6	47100.6	66071.7	54802.8	45979.9	64573
15635862	671	2-Methyl-4-pentyloxazole	C9H15NO	None	None	43484.5	85823.5	70556.6	62282.7	31695.5	46664.1	46442.7	35796.4	46553.4	82530	55471.1	55631.5	55233.3	41342	50451.1	67956.7	43983.7	55352.2	55302	54043.7	47325.3	35426.1	38532.8	42997.4	54721	79016.4	50684.5	51867.7	38978.3	64358.1	43211.6	39132.1	48669	44666	60231.2	46667.5	66017.8	38661.4	44074.6	47100.6	66071.7	54802.8	45979.9	64573
15635863	671	2-Isobutyl-4,5-dimethyloxazole	C9H15NO	None	None	43484.5	85823.5	70556.6	62282.7	31695.5	46664.1	46442.7	35796.4	46553.4	82530	55471.1	55631.5	55233.3	41342	50451.1	67956.7	43983.7	55352.2	55302	54043.7	47325.3	35426.1	38532.8	42997.4	54721	79016.4	50684.5	51867.7	38978.3	64358.1	43211.6	39132.1	48669	44666	60231.2	46667.5	66017.8	38661.4	44074.6	47100.6	66071.7	54802.8	45979.9	64573
15635864	671	5-Butyl-2,4-dimethyloxazole	C9H15NO	None	None	43484.5	85823.5	70556.6	62282.7	31695.5	46664.1	46442.7	35796.4	46553.4	82530	55471.1	55631.5	55233.3	41342	50451.1	67956.7	43983.7	55352.2	55302	54043.7	47325.3	35426.1	38532.8	42997.4	54721	79016.4	50684.5	51867.7	38978.3	64358.1	43211.6	39132.1	48669	44666	60231.2	46667.5	66017.8	38661.4	44074.6	47100.6	66071.7	54802.8	45979.9	64573
15635865	671	4-Ethyl-5-methyl-2-propyloxazole	C9H15NO	None	None	43484.5	85823.5	70556.6	62282.7	31695.5	46664.1	46442.7	35796.4	46553.4	82530	55471.1	55631.5	55233.3	41342	50451.1	67956.7	43983.7	55352.2	55302	54043.7	47325.3	35426.1	38532.8	42997.4	54721	79016.4	50684.5	51867.7	38978.3	64358.1	43211.6	39132.1	48669	44666	60231.2	46667.5	66017.8	38661.4	44074.6	47100.6	66071.7	54802.8	45979.9	64573
15635866	671	4-Ethyl-2-methyl-5-propyloxazole	C9H15NO	None	None	43484.5	85823.5	70556.6	62282.7	31695.5	46664.1	46442.7	35796.4	46553.4	82530	55471.1	55631.5	55233.3	41342	50451.1	67956.7	43983.7	55352.2	55302	54043.7	47325.3	35426.1	38532.8	42997.4	54721	79016.4	50684.5	51867.7	38978.3	64358.1	43211.6	39132.1	48669	44666	60231.2	46667.5	66017.8	38661.4	44074.6	47100.6	66071.7	54802.8	45979.9	64573
15635867	671	2-Ethyl-4-methyl-5-propyloxazole	C9H15NO	None	None	43484.5	85823.5	70556.6	62282.7	31695.5	46664.1	46442.7	35796.4	46553.4	82530	55471.1	55631.5	55233.3	41342	50451.1	67956.7	43983.7	55352.2	55302	54043.7	47325.3	35426.1	38532.8	42997.4	54721	79016.4	50684.5	51867.7	38978.3	64358.1	43211.6	39132.1	48669	44666	60231.2	46667.5	66017.8	38661.4	44074.6	47100.6	66071.7	54802.8	45979.9	64573
15635868	671	2-Butyl-4,5-dimethyloxazole	C9H15NO	None	None	43484.5	85823.5	70556.6	62282.7	31695.5	46664.1	46442.7	35796.4	46553.4	82530	55471.1	55631.5	55233.3	41342	50451.1	67956.7	43983.7	55352.2	55302	54043.7	47325.3	35426.1	38532.8	42997.4	54721	79016.4	50684.5	51867.7	38978.3	64358.1	43211.6	39132.1	48669	44666	60231.2	46667.5	66017.8	38661.4	44074.6	47100.6	66071.7	54802.8	45979.9	64573
15635869	671	5-Ethyl-4-methyl-2-(1-methylethyl)oxazole	C9H15NO	None	None	43484.5	85823.5	70556.6	62282.7	31695.5	46664.1	46442.7	35796.4	46553.4	82530	55471.1	55631.5	55233.3	41342	50451.1	67956.7	43983.7	55352.2	55302	54043.7	47325.3	35426.1	38532.8	42997.4	54721	79016.4	50684.5	51867.7	38978.3	64358.1	43211.6	39132.1	48669	44666	60231.2	46667.5	66017.8	38661.4	44074.6	47100.6	66071.7	54802.8	45979.9	64573
15635870	671	5-Ethyl-2-methyl-4-propyloxazole	C9H15NO	None	None	43484.5	85823.5	70556.6	62282.7	31695.5	46664.1	46442.7	35796.4	46553.4	82530	55471.1	55631.5	55233.3	41342	50451.1	67956.7	43983.7	55352.2	55302	54043.7	47325.3	35426.1	38532.8	42997.4	54721	79016.4	50684.5	51867.7	38978.3	64358.1	43211.6	39132.1	48669	44666	60231.2	46667.5	66017.8	38661.4	44074.6	47100.6	66071.7	54802.8	45979.9	64573
15635871	671	4-Butyl-2,5-dimethyloxazole	C9H15NO	None	None	43484.5	85823.5	70556.6	62282.7	31695.5	46664.1	46442.7	35796.4	46553.4	82530	55471.1	55631.5	55233.3	41342	50451.1	67956.7	43983.7	55352.2	55302	54043.7	47325.3	35426.1	38532.8	42997.4	54721	79016.4	50684.5	51867.7	38978.3	64358.1	43211.6	39132.1	48669	44666	60231.2	46667.5	66017.8	38661.4	44074.6	47100.6	66071.7	54802.8	45979.9	64573
15635872	671	4-Ethyl-5-methyl-2-(1-methylethyl)oxazole	C9H15NO	None	None	43484.5	85823.5	70556.6	62282.7	31695.5	46664.1	46442.7	35796.4	46553.4	82530	55471.1	55631.5	55233.3	41342	50451.1	67956.7	43983.7	55352.2	55302	54043.7	47325.3	35426.1	38532.8	42997.4	54721	79016.4	50684.5	51867.7	38978.3	64358.1	43211.6	39132.1	48669	44666	60231.2	46667.5	66017.8	38661.4	44074.6	47100.6	66071.7	54802.8	45979.9	64573
15635892	673	N-(3-oxo-octanoyl)-homoserine lactone	C12H19NO4	None	None	40127.3	34184.5	29932.1	38070.8	26026.9	22181.7	29837.9	27403.8	29885	39510	31879.9	27837.2	35453	30047.3	31788.5	28407.5	18955.2	30917.9	37594.6	35431.4	27142.3	29756.8	61103.4	61347.2	44328.4	44661.9	40961.5	85275.5	35283.6	22874.8	25578.6	39441.7	22632.7	32395.2	27111.6	29753.4	28847.2	28729	34151	31772.1	38686.2	47085.3	30229	31425.1
15635902	674	Talbutal	C13H20N2O3	None	None	64463.7	81571.1	67275.6	56058.9	84002.8	73951.9	61932.6	61994.7	65869.7	77144.6	66002.4	62838.9	60170.9	65569.8	67467.8	61363.9	61171.9	64204.3	56349.3	59023.3	57999.6	57425	63844.8	53410.2	68849.5	69986	58511.4	63412.3	59790.5	63892.5	64865.8	80067.8	61220.2	63013	58027.1	63212.6	59726.3	76819.1	55910.2	59255.8	69185.9	63537.8	66309.6	57848.8
15635926	677	Neotussilagine	C10H17NO3	None	None	45460.4	44328.6	40740.5	41500.8	39690.1	37806.1	39590.1	40058.1	40399.3	55793.3	44133.6	46801.3	44381.9	42686.8	41751.6	42322	34628	43410.2	48982.5	39144.5	30481	30761.5	50657.1	49297.2	40971.3	78820	44976.9	36442.1	31207.5	34023.2	41164.2	43505.4	36148.1	38124.8	68287.7	37283.4	50805.3	36047.6	55448.4	50719.6	53020.5	71900.9	58713	44028.4
15635929	677	Ecgonine methyl ester	C10H17NO3	Metabolism; Biosynthesis of other secondary metabolites	Tropane, piperidine and pyridine alkaloid biosynthesis	45460.4	44328.6	40740.5	41500.8	39690.1	37806.1	39590.1	40058.1	40399.3	55793.3	44133.6	46801.3	44381.9	42686.8	41751.6	42322	34628	43410.2	48982.5	39144.5	30481	30761.5	50657.1	49297.2	40971.3	78820	44976.9	36442.1	31207.5	34023.2	41164.2	43505.4	36148.1	38124.8	68287.7	37283.4	50805.3	36047.6	55448.4	50719.6	53020.5	71900.9	58713	44028.4
15635932	677	Tussilagine	C10H17NO3	None	None	45460.4	44328.6	40740.5	41500.8	39690.1	37806.1	39590.1	40058.1	40399.3	55793.3	44133.6	46801.3	44381.9	42686.8	41751.6	42322	34628	43410.2	48982.5	39144.5	30481	30761.5	50657.1	49297.2	40971.3	78820	44976.9	36442.1	31207.5	34023.2	41164.2	43505.4	36148.1	38124.8	68287.7	37283.4	50805.3	36047.6	55448.4	50719.6	53020.5	71900.9	58713	44028.4
15635937	678	1,2,3,4,Tetrahydro-1,5,7-trimethylnapthalene	C13H18	None	None	46793.8	33329.9	49485.7	32480.7	37826.1	38535.9	45955.6	35469.8	38181	55657.7	59686.9	37762.2	39839.8	45990	41810.9	38341.6	23166.3	40825.4	47883.9	51558.1	25026.6	37647.8	37192.7	35476.4	47876.8	55415.5	42762.3	31474.7	28259.4	35382.2	31393.8	52107.7	21798.8	30874.1	55339.9	31434.3	45076.3	53560.8	30981.8	52053.8	52502.9	43056.5	49505.6	55469.4
15635938	678	alpha-Ionene	C13H18	None	None	46793.8	33329.9	49485.7	32480.7	37826.1	38535.9	45955.6	35469.8	38181	55657.7	59686.9	37762.2	39839.8	45990	41810.9	38341.6	23166.3	40825.4	47883.9	51558.1	25026.6	37647.8	37192.7	35476.4	47876.8	55415.5	42762.3	31474.7	28259.4	35382.2	31393.8	52107.7	21798.8	30874.1	55339.9	31434.3	45076.3	53560.8	30981.8	52053.8	52502.9	43056.5	49505.6	55469.4
15635939	678	1-Methyl-4-(1-methyl-2-propenyl)-benzene	C13H18	None	None	46793.8	33329.9	49485.7	32480.7	37826.1	38535.9	45955.6	35469.8	38181	55657.7	59686.9	37762.2	39839.8	45990	41810.9	38341.6	23166.3	40825.4	47883.9	51558.1	25026.6	37647.8	37192.7	35476.4	47876.8	55415.5	42762.3	31474.7	28259.4	35382.2	31393.8	52107.7	21798.8	30874.1	55339.9	31434.3	45076.3	53560.8	30981.8	52053.8	52502.9	43056.5	49505.6	55469.4
15635940	678	5,7alpha-Dihydro-1,4,4,7a-tetramethyl-4H-indene	C13H18	None	None	46793.8	33329.9	49485.7	32480.7	37826.1	38535.9	45955.6	35469.8	38181	55657.7	59686.9	37762.2	39839.8	45990	41810.9	38341.6	23166.3	40825.4	47883.9	51558.1	25026.6	37647.8	37192.7	35476.4	47876.8	55415.5	42762.3	31474.7	28259.4	35382.2	31393.8	52107.7	21798.8	30874.1	55339.9	31434.3	45076.3	53560.8	30981.8	52053.8	52502.9	43056.5	49505.6	55469.4
15635941	679	Methoxamine	C11H17NO3	None	None	60694.8	37288.1	60525.7	55357.7	54580.5	56138.4	54803.3	38704.4	55080.5	74208.6	39389.3	51406.9	58415.9	50659.2	49334.6	52944	37344.3	51033.1	46402.1	56732.5	41331.9	30979.6	53565.7	47456.5	56264.8	62780.1	50511.1	31122.1	42432.4	36666	42053.4	58865.4	37929.3	36785.7	48083.9	39991.3	52929.1	36056	37037.8	48595.7	43361	52071.7	44289.2	33626
15635942	679	Orciprenaline	C11H17NO3	None	None	60694.8	37288.1	60525.7	55357.7	54580.5	56138.4	54803.3	38704.4	55080.5	74208.6	39389.3	51406.9	58415.9	50659.2	49334.6	52944	37344.3	51033.1	46402.1	56732.5	41331.9	30979.6	53565.7	47456.5	56264.8	62780.1	50511.1	31122.1	42432.4	36666	42053.4	58865.4	37929.3	36785.7	48083.9	39991.3	52929.1	36056	37037.8	48595.7	43361	52071.7	44289.2	33626
15635944	679	Isoproterenol	C11H17NO3	Organismal Systems; Circulatory system	Adrenergic signaling in cardiomyocytes	60694.8	37288.1	60525.7	55357.7	54580.5	56138.4	54803.3	38704.4	55080.5	74208.6	39389.3	51406.9	58415.9	50659.2	49334.6	52944	37344.3	51033.1	46402.1	56732.5	41331.9	30979.6	53565.7	47456.5	56264.8	62780.1	50511.1	31122.1	42432.4	36666	42053.4	58865.4	37929.3	36785.7	48083.9	39991.3	52929.1	36056	37037.8	48595.7	43361	52071.7	44289.2	33626
15635946	679	Mescaline	C11H17NO3	None	None	60694.8	37288.1	60525.7	55357.7	54580.5	56138.4	54803.3	38704.4	55080.5	74208.6	39389.3	51406.9	58415.9	50659.2	49334.6	52944	37344.3	51033.1	46402.1	56732.5	41331.9	30979.6	53565.7	47456.5	56264.8	62780.1	50511.1	31122.1	42432.4	36666	42053.4	58865.4	37929.3	36785.7	48083.9	39991.3	52929.1	36056	37037.8	48595.7	43361	52071.7	44289.2	33626
15635947	679	L-Isoprenaline	C11H17NO3	None	None	60694.8	37288.1	60525.7	55357.7	54580.5	56138.4	54803.3	38704.4	55080.5	74208.6	39389.3	51406.9	58415.9	50659.2	49334.6	52944	37344.3	51033.1	46402.1	56732.5	41331.9	30979.6	53565.7	47456.5	56264.8	62780.1	50511.1	31122.1	42432.4	36666	42053.4	58865.4	37929.3	36785.7	48083.9	39991.3	52929.1	36056	37037.8	48595.7	43361	52071.7	44289.2	33626
15635952	681	Heptyl 4-hydroxybenzoate	C14H20O3	None	None	33136.4	36794.5	55495.6	30785.9	23777.3	25404.6	33865.2	24525.2	31961.1	60583.2	58002.3	35186.3	32396.1	19541.5	24934.4	29853.5	16490.1	31124.8	36284	25596.8	21369.3	29012.2	26842.2	33417.1	26828.3	39445	27927.2	26424.5	24282.3	28015.2	23177.4	30725.6	33749.1	31100.5	35458.7	29370.4	27029.6	32961.8	33079.3	35224.9	36333.1	39311.6	29660.8	22511.2
15635953	681	Eremopetasidione	C14H20O3	None	None	33136.4	36794.5	55495.6	30785.9	23777.3	25404.6	33865.2	24525.2	31961.1	60583.2	58002.3	35186.3	32396.1	19541.5	24934.4	29853.5	16490.1	31124.8	36284	25596.8	21369.3	29012.2	26842.2	33417.1	26828.3	39445	27927.2	26424.5	24282.3	28015.2	23177.4	30725.6	33749.1	31100.5	35458.7	29370.4	27029.6	32961.8	33079.3	35224.9	36333.1	39311.6	29660.8	22511.2
15635954	681	4-Heptyloxybenzoic acid	C14H20O3	None	None	33136.4	36794.5	55495.6	30785.9	23777.3	25404.6	33865.2	24525.2	31961.1	60583.2	58002.3	35186.3	32396.1	19541.5	24934.4	29853.5	16490.1	31124.8	36284	25596.8	21369.3	29012.2	26842.2	33417.1	26828.3	39445	27927.2	26424.5	24282.3	28015.2	23177.4	30725.6	33749.1	31100.5	35458.7	29370.4	27029.6	32961.8	33079.3	35224.9	36333.1	39311.6	29660.8	22511.2
15635955	681	12,13-Dimethyl-5,14-dioxabicyclo[9.2.1]-tetradeca-1(13),11-dien-4-one	C14H20O3	None	None	33136.4	36794.5	55495.6	30785.9	23777.3	25404.6	33865.2	24525.2	31961.1	60583.2	58002.3	35186.3	32396.1	19541.5	24934.4	29853.5	16490.1	31124.8	36284	25596.8	21369.3	29012.2	26842.2	33417.1	26828.3	39445	27927.2	26424.5	24282.3	28015.2	23177.4	30725.6	33749.1	31100.5	35458.7	29370.4	27029.6	32961.8	33079.3	35224.9	36333.1	39311.6	29660.8	22511.2
15635956	682	4,4alpha,5,6-Tetrahydro-7-methyl-2(3H)-naphthalenone	C11H14O	None	None	27938.3	31054.8	30201.2	30243.1	17383.7	41349.4	29912.3	21860.5	30056.7	30715.2	31242	26492.4	24971.2	18976.5	36607.2	36323.4	15277.1	28603.8	34334.8	37988.7	19415.1	19321.9	27312.4	23384.2	38720.4	63596.8	30823.6	21011.3	23600.1	26840.2	19209.2	41919.2	22737.4	24895.8	19277.1	23168.8	30331.8	22353.4	27305.5	22029.1	17134.1	28936.2	30080.8	17033.2
15635957	682	(±)-2-Methyl-3-(2-methylphenyl)propanal	C11H14O	None	None	27938.3	31054.8	30201.2	30243.1	17383.7	41349.4	29912.3	21860.5	30056.7	30715.2	31242	26492.4	24971.2	18976.5	36607.2	36323.4	15277.1	28603.8	34334.8	37988.7	19415.1	19321.9	27312.4	23384.2	38720.4	63596.8	30823.6	21011.3	23600.1	26840.2	19209.2	41919.2	22737.4	24895.8	19277.1	23168.8	30331.8	22353.4	27305.5	22029.1	17134.1	28936.2	30080.8	17033.2
15635958	682	4'-Isopropylacetophenone	C11H14O	None	None	27938.3	31054.8	30201.2	30243.1	17383.7	41349.4	29912.3	21860.5	30056.7	30715.2	31242	26492.4	24971.2	18976.5	36607.2	36323.4	15277.1	28603.8	34334.8	37988.7	19415.1	19321.9	27312.4	23384.2	38720.4	63596.8	30823.6	21011.3	23600.1	26840.2	19209.2	41919.2	22737.4	24895.8	19277.1	23168.8	30331.8	22353.4	27305.5	22029.1	17134.1	28936.2	30080.8	17033.2
15635959	682	4-(4-Methylphenyl)-2-butanone	C11H14O	None	None	27938.3	31054.8	30201.2	30243.1	17383.7	41349.4	29912.3	21860.5	30056.7	30715.2	31242	26492.4	24971.2	18976.5	36607.2	36323.4	15277.1	28603.8	34334.8	37988.7	19415.1	19321.9	27312.4	23384.2	38720.4	63596.8	30823.6	21011.3	23600.1	26840.2	19209.2	41919.2	22737.4	24895.8	19277.1	23168.8	30331.8	22353.4	27305.5	22029.1	17134.1	28936.2	30080.8	17033.2
15635960	682	4-Isopropylphenylacetaldehyde	C11H14O	None	None	27938.3	31054.8	30201.2	30243.1	17383.7	41349.4	29912.3	21860.5	30056.7	30715.2	31242	26492.4	24971.2	18976.5	36607.2	36323.4	15277.1	28603.8	34334.8	37988.7	19415.1	19321.9	27312.4	23384.2	38720.4	63596.8	30823.6	21011.3	23600.1	26840.2	19209.2	41919.2	22737.4	24895.8	19277.1	23168.8	30331.8	22353.4	27305.5	22029.1	17134.1	28936.2	30080.8	17033.2
15635961	682	(±)-2-Methyl-3-(4-methylphenyl)propanal	C11H14O	None	None	27938.3	31054.8	30201.2	30243.1	17383.7	41349.4	29912.3	21860.5	30056.7	30715.2	31242	26492.4	24971.2	18976.5	36607.2	36323.4	15277.1	28603.8	34334.8	37988.7	19415.1	19321.9	27312.4	23384.2	38720.4	63596.8	30823.6	21011.3	23600.1	26840.2	19209.2	41919.2	22737.4	24895.8	19277.1	23168.8	30331.8	22353.4	27305.5	22029.1	17134.1	28936.2	30080.8	17033.2
15635962	682	1-Phenyl-1-pentanone	C11H14O	None	None	27938.3	31054.8	30201.2	30243.1	17383.7	41349.4	29912.3	21860.5	30056.7	30715.2	31242	26492.4	24971.2	18976.5	36607.2	36323.4	15277.1	28603.8	34334.8	37988.7	19415.1	19321.9	27312.4	23384.2	38720.4	63596.8	30823.6	21011.3	23600.1	26840.2	19209.2	41919.2	22737.4	24895.8	19277.1	23168.8	30331.8	22353.4	27305.5	22029.1	17134.1	28936.2	30080.8	17033.2
15635963	682	3-Methyl-2-phenylbutanal	C11H14O	None	None	27938.3	31054.8	30201.2	30243.1	17383.7	41349.4	29912.3	21860.5	30056.7	30715.2	31242	26492.4	24971.2	18976.5	36607.2	36323.4	15277.1	28603.8	34334.8	37988.7	19415.1	19321.9	27312.4	23384.2	38720.4	63596.8	30823.6	21011.3	23600.1	26840.2	19209.2	41919.2	22737.4	24895.8	19277.1	23168.8	30331.8	22353.4	27305.5	22029.1	17134.1	28936.2	30080.8	17033.2
15635964	682	2-Methyl-4-phenylbutyraldehyde	C11H14O	None	None	27938.3	31054.8	30201.2	30243.1	17383.7	41349.4	29912.3	21860.5	30056.7	30715.2	31242	26492.4	24971.2	18976.5	36607.2	36323.4	15277.1	28603.8	34334.8	37988.7	19415.1	19321.9	27312.4	23384.2	38720.4	63596.8	30823.6	21011.3	23600.1	26840.2	19209.2	41919.2	22737.4	24895.8	19277.1	23168.8	30331.8	22353.4	27305.5	22029.1	17134.1	28936.2	30080.8	17033.2
15635965	682	4,10-undecadiynal	C11H14O	None	None	27938.3	31054.8	30201.2	30243.1	17383.7	41349.4	29912.3	21860.5	30056.7	30715.2	31242	26492.4	24971.2	18976.5	36607.2	36323.4	15277.1	28603.8	34334.8	37988.7	19415.1	19321.9	27312.4	23384.2	38720.4	63596.8	30823.6	21011.3	23600.1	26840.2	19209.2	41919.2	22737.4	24895.8	19277.1	23168.8	30331.8	22353.4	27305.5	22029.1	17134.1	28936.2	30080.8	17033.2
15635966	683	Nepetalactam	C10H15NO	None	None	37809	41296.7	47364.2	43137.2	32142	33386.4	41941.6	39234.7	40265.7	61931.7	42684.2	41882.3	34312.2	32896.2	46819.6	37055.9	32970.5	39469.1	35522	33790.7	31445.4	32553.4	38686.4	36342.7	42553.4	56439.8	35932.3	32426.5	28940.4	45570	33946.6	38146.1	40786.8	28330	24798.6	33186.6	42463.1	40663.2	25069.9	30139.6	29606.2	37871.6	30287.6	34831.1
15635967	683	Hordenine	C10H15NO	Metabolism; Amino acid metabolism	Tyrosine metabolism	37809	41296.7	47364.2	43137.2	32142	33386.4	41941.6	39234.7	40265.7	61931.7	42684.2	41882.3	34312.2	32896.2	46819.6	37055.9	32970.5	39469.1	35522	33790.7	31445.4	32553.4	38686.4	36342.7	42553.4	56439.8	35932.3	32426.5	28940.4	45570	33946.6	38146.1	40786.8	28330	24798.6	33186.6	42463.1	40663.2	25069.9	30139.6	29606.2	37871.6	30287.6	34831.1
15635968	683	Perilla sugar	C10H15NO	None	None	37809	41296.7	47364.2	43137.2	32142	33386.4	41941.6	39234.7	40265.7	61931.7	42684.2	41882.3	34312.2	32896.2	46819.6	37055.9	32970.5	39469.1	35522	33790.7	31445.4	32553.4	38686.4	36342.7	42553.4	56439.8	35932.3	32426.5	28940.4	45570	33946.6	38146.1	40786.8	28330	24798.6	33186.6	42463.1	40663.2	25069.9	30139.6	29606.2	37871.6	30287.6	34831.1
15635969	683	4-Hydroxymethamphetamine	C10H15NO	None	None	37809	41296.7	47364.2	43137.2	32142	33386.4	41941.6	39234.7	40265.7	61931.7	42684.2	41882.3	34312.2	32896.2	46819.6	37055.9	32970.5	39469.1	35522	33790.7	31445.4	32553.4	38686.4	36342.7	42553.4	56439.8	35932.3	32426.5	28940.4	45570	33946.6	38146.1	40786.8	28330	24798.6	33186.6	42463.1	40663.2	25069.9	30139.6	29606.2	37871.6	30287.6	34831.1
15635970	683	(+)-Pseudoephedrine	C10H15NO	Metabolism; Amino acid metabolism	Phenylalanine metabolism	37809	41296.7	47364.2	43137.2	32142	33386.4	41941.6	39234.7	40265.7	61931.7	42684.2	41882.3	34312.2	32896.2	46819.6	37055.9	32970.5	39469.1	35522	33790.7	31445.4	32553.4	38686.4	36342.7	42553.4	56439.8	35932.3	32426.5	28940.4	45570	33946.6	38146.1	40786.8	28330	24798.6	33186.6	42463.1	40663.2	25069.9	30139.6	29606.2	37871.6	30287.6	34831.1
15635971	683	5-Ethyl-1,2,3,4,5,6-hexahydro-7H-cyclopenta[b]pyridin-7-one	C10H15NO	None	None	37809	41296.7	47364.2	43137.2	32142	33386.4	41941.6	39234.7	40265.7	61931.7	42684.2	41882.3	34312.2	32896.2	46819.6	37055.9	32970.5	39469.1	35522	33790.7	31445.4	32553.4	38686.4	36342.7	42553.4	56439.8	35932.3	32426.5	28940.4	45570	33946.6	38146.1	40786.8	28330	24798.6	33186.6	42463.1	40663.2	25069.9	30139.6	29606.2	37871.6	30287.6	34831.1
15635972	683	6-Ethyl-1,2,3,4,5,6-hexahydro-7H-cyclopenta[b]pyridin-7-one	C10H15NO	None	None	37809	41296.7	47364.2	43137.2	32142	33386.4	41941.6	39234.7	40265.7	61931.7	42684.2	41882.3	34312.2	32896.2	46819.6	37055.9	32970.5	39469.1	35522	33790.7	31445.4	32553.4	38686.4	36342.7	42553.4	56439.8	35932.3	32426.5	28940.4	45570	33946.6	38146.1	40786.8	28330	24798.6	33186.6	42463.1	40663.2	25069.9	30139.6	29606.2	37871.6	30287.6	34831.1
15635973	683	2,3,4,5,6,7-Hexahydro-7-methylcyclopent[b]azepin-8(1H)-one	C10H15NO	None	None	37809	41296.7	47364.2	43137.2	32142	33386.4	41941.6	39234.7	40265.7	61931.7	42684.2	41882.3	34312.2	32896.2	46819.6	37055.9	32970.5	39469.1	35522	33790.7	31445.4	32553.4	38686.4	36342.7	42553.4	56439.8	35932.3	32426.5	28940.4	45570	33946.6	38146.1	40786.8	28330	24798.6	33186.6	42463.1	40663.2	25069.9	30139.6	29606.2	37871.6	30287.6	34831.1
15635974	683	3-Methyl-2-(1-pyrrolidinyl)-2-cyclopenten-1-one	C10H15NO	None	None	37809	41296.7	47364.2	43137.2	32142	33386.4	41941.6	39234.7	40265.7	61931.7	42684.2	41882.3	34312.2	32896.2	46819.6	37055.9	32970.5	39469.1	35522	33790.7	31445.4	32553.4	38686.4	36342.7	42553.4	56439.8	35932.3	32426.5	28940.4	45570	33946.6	38146.1	40786.8	28330	24798.6	33186.6	42463.1	40663.2	25069.9	30139.6	29606.2	37871.6	30287.6	34831.1
15635975	683	5-Methyl-2-(1-pyrrolidinyl)-2-cyclopenten-1-one	C10H15NO	None	None	37809	41296.7	47364.2	43137.2	32142	33386.4	41941.6	39234.7	40265.7	61931.7	42684.2	41882.3	34312.2	32896.2	46819.6	37055.9	32970.5	39469.1	35522	33790.7	31445.4	32553.4	38686.4	36342.7	42553.4	56439.8	35932.3	32426.5	28940.4	45570	33946.6	38146.1	40786.8	28330	24798.6	33186.6	42463.1	40663.2	25069.9	30139.6	29606.2	37871.6	30287.6	34831.1
15635977	683	2-(5-Methyl-2-furanyl)piperidine	C10H15NO	None	None	37809	41296.7	47364.2	43137.2	32142	33386.4	41941.6	39234.7	40265.7	61931.7	42684.2	41882.3	34312.2	32896.2	46819.6	37055.9	32970.5	39469.1	35522	33790.7	31445.4	32553.4	38686.4	36342.7	42553.4	56439.8	35932.3	32426.5	28940.4	45570	33946.6	38146.1	40786.8	28330	24798.6	33186.6	42463.1	40663.2	25069.9	30139.6	29606.2	37871.6	30287.6	34831.1
15635978	683	1-[(5-Methyl-2-furanyl)methyl]pyrrolidine	C10H15NO	None	None	37809	41296.7	47364.2	43137.2	32142	33386.4	41941.6	39234.7	40265.7	61931.7	42684.2	41882.3	34312.2	32896.2	46819.6	37055.9	32970.5	39469.1	35522	33790.7	31445.4	32553.4	38686.4	36342.7	42553.4	56439.8	35932.3	32426.5	28940.4	45570	33946.6	38146.1	40786.8	28330	24798.6	33186.6	42463.1	40663.2	25069.9	30139.6	29606.2	37871.6	30287.6	34831.1
15635981	683	Ephedrine	C10H15NO	Metabolism; Amino acid metabolism	Phenylalanine metabolism	37809	41296.7	47364.2	43137.2	32142	33386.4	41941.6	39234.7	40265.7	61931.7	42684.2	41882.3	34312.2	32896.2	46819.6	37055.9	32970.5	39469.1	35522	33790.7	31445.4	32553.4	38686.4	36342.7	42553.4	56439.8	35932.3	32426.5	28940.4	45570	33946.6	38146.1	40786.8	28330	24798.6	33186.6	42463.1	40663.2	25069.9	30139.6	29606.2	37871.6	30287.6	34831.1
15635989	683	Anatoxin a	C10H15NO	None	None	37809	41296.7	47364.2	43137.2	32142	33386.4	41941.6	39234.7	40265.7	61931.7	42684.2	41882.3	34312.2	32896.2	46819.6	37055.9	32970.5	39469.1	35522	33790.7	31445.4	32553.4	38686.4	36342.7	42553.4	56439.8	35932.3	32426.5	28940.4	45570	33946.6	38146.1	40786.8	28330	24798.6	33186.6	42463.1	40663.2	25069.9	30139.6	29606.2	37871.6	30287.6	34831.1
15636021	685	(2E,4E,6E)-7-Hydroxy-4-methylhepta-2,4,6-trienal	C8H10O2	None	None	32866.6	28332.3	36031.4	31005.7	33645.2	28902.1	32806.5	23610	31906.1	43601.4	42229.3	36000.7	29955.8	29469.5	30165.7	27379	20435.5	30060.7	28355.1	43662.1	22082.7	24367.2	38095.3	39204.9	29822.8	34629.2	32226	30353.2	26629.7	27621.5	31668.1	35735	25059.5	23447.9	29619.5	28620.5	32127.6	30909.1	33930.4	31952.7	29091	58719.8	35369.9	32044
15636030	686	Tocainide	C11H16N2O	None	None	42583.5	45669.2	37463.8	35882.6	45456.9	47089.1	39240.5	36043.7	40912	51445.2	49848.9	36739.6	43225.3	43352.5	40326.9	34085.3	39745.9	41776.1	41253.9	43763	32834.4	44801	41683.7	38299.8	38594.6	43078.5	41468.8	36476.2	40614.8	38903.7	35758.7	40501.9	50561.6	43736	39969.8	40235.9	41379.7	38296.1	47951.4	40632.6	39347.5	43126.7	44164.3	42424.7
15636065	688	beta-O-Methylynephrine	C10H15NO2	None	None	32271.5	39057.6	39051.2	32107.6	26101	31142.4	26753.5	27892.2	31625	31551.3	30963.7	39302.8	27002.3	30993.5	33054.6	29323.4	21200.8	30978.6	29558.3	29362.1	33886.7	30471.1	37233	23829.2	31831.1	41505.6	31151.1	24388.5	24142.1	30130.6	26368.1	28397.5	32105.9	28649.3	33046.1	28523.4	43142.1	37043.6	29493.8	56760.5	34140.7	33252.3	45419.6	27256.6
15636067	688	3-O-Methyl-a-methyldopamine	C10H15NO2	None	None	32271.5	39057.6	39051.2	32107.6	26101	31142.4	26753.5	27892.2	31625	31551.3	30963.7	39302.8	27002.3	30993.5	33054.6	29323.4	21200.8	30978.6	29558.3	29362.1	33886.7	30471.1	37233	23829.2	31831.1	41505.6	31151.1	24388.5	24142.1	30130.6	26368.1	28397.5	32105.9	28649.3	33046.1	28523.4	43142.1	37043.6	29493.8	56760.5	34140.7	33252.3	45419.6	27256.6
15636068	688	cis-6-Nitro-p-mentha-1(7),2-diene	C10H15NO2	None	None	32271.5	39057.6	39051.2	32107.6	26101	31142.4	26753.5	27892.2	31625	31551.3	30963.7	39302.8	27002.3	30993.5	33054.6	29323.4	21200.8	30978.6	29558.3	29362.1	33886.7	30471.1	37233	23829.2	31831.1	41505.6	31151.1	24388.5	24142.1	30130.6	26368.1	28397.5	32105.9	28649.3	33046.1	28523.4	43142.1	37043.6	29493.8	56760.5	34140.7	33252.3	45419.6	27256.6
15636075	688	2,5-Dimethyl-4-(1-pyrrolidinyl)-3(2H)-furanone	C10H15NO2	None	None	32271.5	39057.6	39051.2	32107.6	26101	31142.4	26753.5	27892.2	31625	31551.3	30963.7	39302.8	27002.3	30993.5	33054.6	29323.4	21200.8	30978.6	29558.3	29362.1	33886.7	30471.1	37233	23829.2	31831.1	41505.6	31151.1	24388.5	24142.1	30130.6	26368.1	28397.5	32105.9	28649.3	33046.1	28523.4	43142.1	37043.6	29493.8	56760.5	34140.7	33252.3	45419.6	27256.6
15636076	688	2-(5-Methyl-2-furanyl)-3-piperidinol	C10H15NO2	None	None	32271.5	39057.6	39051.2	32107.6	26101	31142.4	26753.5	27892.2	31625	31551.3	30963.7	39302.8	27002.3	30993.5	33054.6	29323.4	21200.8	30978.6	29558.3	29362.1	33886.7	30471.1	37233	23829.2	31831.1	41505.6	31151.1	24388.5	24142.1	30130.6	26368.1	28397.5	32105.9	28649.3	33046.1	28523.4	43142.1	37043.6	29493.8	56760.5	34140.7	33252.3	45419.6	27256.6
15636077	688	5-(1-Pyrrolidinylmethyl)-2-furanmethanol	C10H15NO2	None	None	32271.5	39057.6	39051.2	32107.6	26101	31142.4	26753.5	27892.2	31625	31551.3	30963.7	39302.8	27002.3	30993.5	33054.6	29323.4	21200.8	30978.6	29558.3	29362.1	33886.7	30471.1	37233	23829.2	31831.1	41505.6	31151.1	24388.5	24142.1	30130.6	26368.1	28397.5	32105.9	28649.3	33046.1	28523.4	43142.1	37043.6	29493.8	56760.5	34140.7	33252.3	45419.6	27256.6
[truncated: 4,836 more rows]
[truncated: 29 more columns]
