# Supplementary material for: Integrated Metabolomics and Proteomics Dynamics of Serum Samples Reveals Dietary Zeolite Clinoptilolite Supplementation Restores Energy Balance in High Yielding Dairy Cows
Source: Metabolites. 2021 Dec 5;11(12):842. doi: 10.3390/metabo11120842 (PMC8705350; doi:10.3390/metabo11120842)
Supplement: Supplementary file 1 [file metabolites-11-00842-s001.zip › supplementary files/Supplementary Table S3.xlsx]

## Sheet: Sheet1
Supplementary Tabls S3. List of all proteins identified by Proteome Dicoverer 2.3
Accession	Description	# Peptides	C30PP1	C30PP2	C30PP3	C30PP4	C30PP5	C30PP6	C30PP7	C30PP8	C10PP1	C10PP2	C10PP3	C10PP4	C10PP5	C10PP6	C10PP7	C10PP8	C5PPOST1	C5PPOST2	C5PPOST3	C5PPOST4	C5PPOST5	C5PPOST6	C5PPOST7	C5PPOST8	C26PPOST1	C26PPOST2	C26PPOST3	C26PPOST4	C26PPOST5	C26PPOST6	C26PPOST7	C26PPOST8	S30PP1	S30PP2	S30PP3	S30PP4	S30PP5	S30PP6	S30PP7	S30PP8	S10PP1	S10PP2	S10PP3	S10PP4	S10PP5	S10PP6	S10PP7
Q2UVX4	Complement C3 OS=Bos taurus OX=9913 GN=C3 PE=1 SV=2	37	1.196	1.346	1.078	1.127	1.339	1.064	1.241	0.999	1.137	1.274	1.117	1.436	0.933	0.9	1.533	0.83	1.184	1.176	0.927	1.32	1.032	1.054	1.132	1.031	1.074	1.306	1.077	1.182	1.094	1.033	1.151	1.047	0.966	0.735	0.819	0.965	0.847	1.007	0.989	0.714	1.109	0.874	0.834	0.96	0.755	0.982	0.973
A0A0F6QNP7	Complement component 3 OS=Bos taurus OX=9913 GN=C3 PE=2 SV=1	37	1.196	1.346	1.078	1.127	1.339	1.064	1.241	0.999	1.137	1.274	1.117	1.436	0.933	0.9	1.533	0.83	1.184	1.176	0.927	1.32	1.032	1.054	1.132	1.031	1.074	1.306	1.077	1.182	1.094	1.033	1.151	1.047	0.966	0.735	0.819	0.965	0.847	1.007	0.989	0.714	1.109	0.874	0.834	0.96	0.755	0.982	0.973
G3X7A5	Complement C3 OS=Bos taurus OX=9913 GN=C3 PE=4 SV=1	36	1.196	1.346	1.077	1.125	1.339	1.064	1.241	1.001	1.134	1.274	1.117	1.436	0.934	0.9	1.533	0.83	1.186	1.177	0.927	1.32	1.032	1.054	1.134	1.03	1.072	1.311	1.078	1.182	1.093	1.033	1.152	1.046	0.966	0.733	0.819	0.965	0.847	1.007	0.991	0.714	1.109	0.866	0.834	0.961	0.755	0.982	0.973
P02769	Serum albumin OS=Bos taurus OX=9913 GN=ALB PE=1 SV=4	34	1.37	0.972	1.255	1.252	1.072	1.007	1.26	0.711	1.387	0.945	1.366	1.489	1.052	0.941	1.522	0.633	1.306	1.109	1.066	1.361	1.069	1.155	1.086	1.08	1.227	0.715	0.958	1.209	1.124	1.139	1.231	1.101	1.141	0.898	1.099	0.774	1.07	1.058	1.015	0.839	1.442	1.064	0.977	0.889	0.861	1.062	0.947
A0A140T897	Serum albumin OS=Bos taurus OX=9913 GN=ALB PE=3 SV=1	34	1.37	0.972	1.255	1.252	1.072	1.007	1.26	0.711	1.387	0.945	1.366	1.489	1.052	0.941	1.522	0.633	1.306	1.109	1.066	1.361	1.069	1.155	1.086	1.08	1.227	0.715	0.958	1.209	1.124	1.139	1.231	1.101	1.141	0.898	1.099	0.774	1.07	1.058	1.015	0.839	1.442	1.064	0.977	0.889	0.861	1.062	0.947
E1BH06	Uncharacterized protein OS=Bos taurus OX=9913 GN=LOC617696 PE=1 SV=2	31	1.214	1.257	1.232	1.123	1.231	1.154	1.047	1.009	1.142	1.179	1.23	1.404	0.865	1.3	1.356	0.815	1.196	1.003	1.026	1.277	1.102	1.044	1.166	1.131	1.093	1.118	1.139	1.163	1.157	1.121	1.233	1.144	0.995	0.739	0.997	0.886	0.91	1.005	1.16	0.745	1.18	0.899	0.96	0.933	0.761	1.05	1.06
B0JYQ0	ALB protein OS=Bos taurus OX=9913 GN=ALB PE=2 SV=1	30	1.574		1.369				1.234			0.889	1.361	1.514	0.991	1.215	1.383				2.598	1.287	1.161	1.287	1.176	1.18	1.214		1.046	1.826		1.06	1.048	1.338	1.138			0.887	1.088	0.726		0.874	1.362		3.328	0.935	0.957
Q7SIH1	Alpha-2-macroglobulin OS=Bos taurus OX=9913 GN=A2M PE=1 SV=2	29	1.273	1.061	1.133	1.154	1.046	0.941	1.21	0.806	1.318	1.093	1.233	1.444	0.931	0.961	1.47	0.661	1.175	1.019	0.919	1.355	1.006	1.017	1.097	0.972	1.052	1.245	0.945	1.203	0.999	1.095	1.218	1.002	1.173	1.068	0.903	0.874	1.059	1.006	1.047	0.819	1.182	1.264	0.868	0.963	0.873	1.053	0.919
B8Y9S9	Embryo-specific fibronectin 1 transcript variant OS=Bos taurus OX=9913 GN=FN1 PE=2 SV=1	29	1.363	1.082	1.158	1.186	1.081	1.1	1.258	1.09	1.359	0.996	1.365	1.363	1.107	0.978	1.59	0.851	1.147	0.879	0.986	1.127	1.056	0.897	1.077	1.088	1.221	1.24	0.968	1.067	1.13	1.029	1.199	1.048	1.086	0.845	0.859	0.909	0.903	1.007	1.163	0.798	0.989	0.948	0.921	0.873	0.835	1	1.028
P07589	Fibronectin OS=Bos taurus OX=9913 GN=FN1 PE=1 SV=4	29	1.363	1.082	1.158	1.186	1.081	1.1	1.258	1.09	1.359	0.996	1.365	1.363	1.107	0.978	1.59	0.851	1.147	0.879	0.986	1.127	1.056	0.897	1.077	1.088	1.221	1.24	0.968	1.067	1.13	1.029	1.199	1.048	1.086	0.845	0.859	0.909	0.903	1.007	1.163	0.798	0.989	0.948	0.921	0.873	0.835	1	1.028
G5E5A9	Fibronectin OS=Bos taurus OX=9913 GN=FN1 PE=4 SV=1	29	1.363	1.082	1.158	1.186	1.081	1.1	1.258	1.09	1.359	0.996	1.365	1.363	1.107	0.978	1.59	0.851	1.147	0.879	0.986	1.127	1.056	0.897	1.077	1.088	1.221	1.24	0.968	1.067	1.13	1.029	1.199	1.048	1.086	0.845	0.859	0.909	0.903	1.007	1.163	0.798	0.989	0.948	0.921	0.873	0.835	1	1.028
B8Y9T0	Cumulus cell-specific fibronectin 1 transcript variant OS=Bos taurus OX=9913 GN=FN1 PE=2 SV=1	28	1.363	1.082	1.158	1.18	1.081	1.1	1.258	1.09	1.359	0.996	1.365	1.363	1.107	0.978	1.59	0.851	1.147	0.888	0.986	1.127	1.056	0.897	1.077	1.088	1.221	1.24	0.968	1.067	1.13	1.029	1.199	1.048	1.086	0.845	0.859	0.909	0.903	1.007	1.165	0.798	0.989	0.948	0.921	0.873	0.835	1.005	1.028
R9QSM8	Alpha-2-macroglobulin OS=Bos taurus OX=9913 GN=A2M PE=2 SV=1	23	1.334	1.053	1.143	1.149	1.069	0.926	1.223	0.808	1.323	1.079	1.241	1.446	0.945	0.937	1.52	0.661	1.203	1.014	0.92	1.352	1.038	1.02	1.094	1	1.069	1.219	0.943	1.228	0.988	1.141	1.232	1.029	1.162	1.084	0.907	0.894	1.062	1.027	1.078	0.808	1.232	1.245	0.87	0.972	0.858	1.091	0.942
Q28085	Complement factor H OS=Bos taurus OX=9913 GN=CFH PE=1 SV=3	22	1.14	1.192	1.037	1.004	1.215	1.236	1.188	1.001	1.091	1.123	1.223	1.285	0.873	1.11	1.468	0.824	1.196	1.093	0.836	1.061	1.067	1.159	1.155	1.131	0.959	1.178	0.952	1.047	1.044	0.927	1.216	1.126	1.193	0.805	0.844	0.887	0.887	0.943	1.084	0.86	1.351	1.032	0.872	0.979	0.907	0.98	1.064
F1MY85	Complement C5a anaphylatoxin OS=Bos taurus OX=9913 GN=C5 PE=1 SV=2	21	1.263	1.428	1.143	1.097	1.275	1.1	1.103	1.073	1.165	1.208	1.289	1.329	0.919	1.187	1.369	0.843	1.292	1.099	0.944	1.182	1.192	1.271	1.154	1.058	1.215	1.507	1.055	1.158	1.098	1.1	1.09	1.11	1.05	0.727	0.834	0.906	0.83	1.067	1.053	0.822	1.25	0.74	0.86	0.903	0.763	0.939	0.97
K4JBR5	Alpha-2-macroglobulin variant 1 OS=Bos taurus OX=9913 GN=A2M PE=2 SV=1	20	1.344	1.031	1.138	1.163	1.053	0.925	1.248	0.777	1.324	1.052	1.241	1.472	0.955	0.947	1.558	0.643	1.2	0.992	0.938	1.362	1.02	0.995	1.091	0.993	1.071	1.166	0.917	1.162	0.998	1.14	1.226	1.024	1.15	1.078	0.902	0.908	1.063	1.052	1.112	0.8	1.259	1.239	0.87	0.985	0.854	1.085	0.938
E1BNR0	Apolipoprotein B OS=Bos taurus OX=9913 GN=APOB PE=1 SV=2	20	1.395	1.215	1.026	1.1	1.261	1.115	1.253	1.016	1.329	1.069	1.204	1.239	1.086	1.616	1.521	0.831	1.01	1.054	0.946	1.289	1.214	1.277	1.413	1.148	1.048	1.74	1.039	1.036	1.125	0.962	1.052	1.24	1.072	0.991	1.104	0.729	1.453	1.065	1.104	0.85	1.067	1.286	1.101	0.952	0.855	1.097	0.948
A0A0F6QMJ3	Complement component 5 OS=Bos taurus OX=9913 GN=C5 PE=2 SV=1	20	1.26	1.437	1.143	1.097	1.28	1.1	1.103	1.073	1.165	1.21	1.289	1.329	0.919	1.187	1.369	0.843	1.292	1.099	0.939	1.182	1.18	1.27	1.154	1.058	1.215	1.507	1.055	1.158	1.098	1.1	1.09	1.11	1.046	0.727	0.834	0.906	0.83	1.067	1.053	0.822	1.241	0.74	0.859	0.903	0.763	0.939	0.968
Q28178	Thrombospondin-1 OS=Bos taurus OX=9913 GN=THBS1 PE=2 SV=2	18	1.19	1.197	1.035	1.092	1.22	1.178	1.145	1.015	1.25	1.245	1.159	1.384	0.766	1.376	1.328	0.995	1.141	1.2	0.77	1.259	1.201	1.138	1.07	1.148	1.094	1.488	1.188	1.12	1.161	1.122	1.117	1.158	0.999	0.939	0.752	0.983	0.979	0.907	1.037	0.79	1.378	1.001	0.774	0.814	0.774	0.994	0.916
F1N3A1	Thrombospondin-1 OS=Bos taurus OX=9913 GN=THBS1 PE=4 SV=1	18	1.19	1.197	1.035	1.092	1.22	1.178	1.145	1.015	1.25	1.245	1.159	1.384	0.766	1.376	1.328	0.995	1.141	1.2	0.77	1.259	1.201	1.138	1.07	1.148	1.094	1.488	1.188	1.12	1.161	1.122	1.117	1.158	0.999	0.939	0.752	0.983	0.979	0.907	1.037	0.79	1.378	1.001	0.774	0.814	0.774	0.994	0.916
Q2KJF1	Alpha-1B-glycoprotein OS=Bos taurus OX=9913 GN=A1BG PE=1 SV=1	17	1.247	1.22	1.093	1.041	1.101	1.013	1.199	0.901	1.168	1.067	1.24	1.208	0.897	1.182	1.436	0.766	1.049	1.038	0.946	1.075	1.027	1.037	1.097	0.978	1.194	1.059	1.066	1.062	1.01	1.016	1.12	1.01	1.097	0.757	0.862	0.818	0.759	0.937	1.095	0.88	1.361	0.864	0.822	0.867	0.819	0.876	0.991
K4JF16	Alpha-2-macroglobulin variant 23 OS=Bos taurus OX=9913 GN=A2M PE=2 SV=1	17	1.36	1.036	1.146	1.169	1.054	0.929	1.261	0.756	1.329	1.056	1.261	1.487	0.972	0.925	1.568	0.624	1.214	1	0.943	1.382	1.011	1.006	1.094	0.996	1.074	1.152	0.919	1.19	0.987	1.161	1.251	1.027	1.15	1.091	0.918	0.905	1.083	1.063	1.118	0.795	1.277	1.253	0.877	0.991	0.851	1.102	0.942
F1MVK1	Uncharacterized protein OS=Bos taurus OX=9913 PE=4 SV=2	17	1.189	1.01	1.117	0.952	1.423		1.064		1.135	1.16	1.287	1.221	0.871	1.154	1.452			0.839	1.224	1.196	1.264	0.792	1.167	1.409	1.089		1.556	1.2	1.12	0.995	1.13	1.187	1.163	0.649		0.863	0.809	0.985	0.909	0.823	1.201		0.974	0.836	1.11	0.932	1.047
K4JDT2	Alpha-2-macroglobulin variant 20 OS=Bos taurus OX=9913 GN=A2M PE=2 SV=1	16	1.367	1.045	1.156	1.172	1.061	0.893	1.265	0.751	1.327	1.079	1.275	1.477	0.979	0.863	1.573	0.617	1.212	1.003	0.931	1.4	1.031	1.003	1.112	0.995	1.103	1.161	0.925	1.193	1.01	1.168	1.267	1	1.147	1.08	0.932	0.903	1.102	1.095	1.148	0.787	1.305	1.252	0.876	1.008	0.84	1.108	0.937
P00735	Prothrombin OS=Bos taurus OX=9913 GN=F2 PE=1 SV=2	16	1.328	1.147	1.169	1.234	1.043	1.03	1.163	1.071	1.188	1.094	1.187	1.322	0.854	1.175	1.39	0.799	1.102	0.972	0.953	1.211	1.185	1.004	1.064	1.099	1.265	1.346	1.008	1.076	1.073	0.996	1.118	1.149	1.09	0.692	0.95	0.899	0.797	0.936	1.083	0.789	1.324	0.89	0.898	0.962	0.797	0.995	0.977
P01030	Complement C4 (Fragments) OS=Bos taurus OX=9913 GN=C4 PE=1 SV=2	15	0.811	1.251	1.066		1.423		1.16	1.032	0.952	1.202	0.761	1.354	0.722	1.5	1.428		1.104			1.57	1.156		1.127	1.215	0.848	1.013	1.378	1.074	1.339	0.834	1.329	1.191	1.042	0.567		0.769	0.872	0.567		0.873	0.957	0.663		0.867	0.865		0.873
F1MC45	Complement factor H precursor OS=Bos taurus OX=9913 PE=4 SV=2	15		1.306	1.6	0.554	1.26			0.781			0.625			2.234	0.544		1.039	1.324	1.519	0.732		2.493		1.437	0.98	1.263	0.41			1.656		1.73				0.721	1.022	1.173	0.992	0.837		1.742	0.977		0.396	1.839	0.947
P81187	Complement factor B OS=Bos taurus OX=9913 GN=CFB PE=1 SV=2	13	1.303	1.089	1.11	1.13	1.043	1.026	1.268	0.93	1.291	1.017	1.188	1.298	0.956	1.013	1.468	0.806	1.105	0.98	0.865	1.266	1.003	1.057	1.028	1.002	1.244	0.995	0.91	1.128	0.937	1.073	1.111	1.24	1.29	0.817	0.904	0.848	0.893	0.879	1.031	0.775	1.119	0.916	0.861	0.888	0.884	0.969	0.977
Q29437	Primary amine oxidase, liver isozyme OS=Bos taurus OX=9913 PE=1 SV=1	13	1.185	1.083	1.234	0.997	1.019	1.058	1.173	0.913	1.24	1.067	1.256	1.245	0.96	1.053	1.48	0.91	1.081	0.975	1.024	1.139	0.935	1.144	1.082	0.99	1.258	0.842	0.984	1.081	0.969	1.121	1.122	1.017	0.997	0.859	0.935	0.922	0.895	1.07	1.138	0.741	1.23	1.06	0.873	0.968	0.788	1.03	1.016
G3X6N3	Serotransferrin OS=Bos taurus OX=9913 GN=TF PE=1 SV=1	13	1.466	1.037	1.246	1.327	0.945	0.938	1.192	0.81	1.414	1.041	1.371	1.56	0.984	0.764	1.498	0.568	1.284	1.016	0.911	1.506	0.856	1.07	1.06	0.958	1.063	0.843	0.899	1.215	0.905	1.031	1.28	0.945	1.015	0.91	1.031	0.809	1.043	0.955	1.03	0.748	1.146	1.021	0.975	0.883	0.794	0.971	0.92
Q29443	Serotransferrin OS=Bos taurus OX=9913 GN=TF PE=2 SV=1	13	1.345	1.026	1.36	1.226	1.168	1.014	1.025	1.098	0.975	0.877	1.211	1.575	0.949	0.846	1.367	0.784	1.021	0.981	0.845	1.275	1.053	1.041	1.076	1.103	1.025	1.333	0.943	1.271	0.903	1.016	1.287	1.113	1.029	0.756	0.871	0.822	0.863	0.928	0.961	0.769	0.926	0.824	0.858	0.912	0.815	0.967	1.037
F1N3Q7	Apolipoprotein A-IV OS=Bos taurus OX=9913 GN=APOA4 PE=3 SV=1	12	1.774	0.94	1.12	1.241	0.913	0.866	1.155	0.611	1.661	0.966	1.308	1.42	1.077	0.945	1.424	0.534	1.175	0.881	0.764	1.232	1.014	1.195	0.965	0.947	1.502	0.705	0.641	1.125	0.954	1.06	1.231	0.926	0.96	1.098	1.258	0.721	0.861	0.928	1.046	0.747	0.876	1.204	1.144	0.787	0.673	0.969	0.954
Q0VCM5	Inter-alpha-trypsin inhibitor heavy chain H1 OS=Bos taurus OX=9913 GN=ITIH1 PE=1 SV=1	12	1.233	1.024	0.937	1.065	0.961	0.888	0.956	0.904	1.207	0.886	1.229	1.251	0.791	0.771	1.197	0.671	1.311	0.806	0.729	1.217	0.743	0.984	0.852	1.208	1.037	0.771	0.87	0.996	0.836	1.065	0.882	1.154	0.867	0.917	0.808	0.65	0.869	1.127	0.965	0.725	0.842	1.136	0.821	0.711	0.71	0.894	0.902
F1MMP5	Inter-alpha-trypsin inhibitor heavy chain H1 OS=Bos taurus OX=9913 GN=ITIH1 PE=4 SV=1	12	1.233	1.024	0.937	1.065	0.961	0.888	0.956	0.904	1.207	0.886	1.229	1.251	0.791	0.771	1.197	0.671	1.311	0.806	0.729	1.217	0.743	0.984	0.852	1.208	1.037	0.771	0.87	0.996	0.836	1.065	0.882	1.154	0.867	0.917	0.808	0.65	0.869	1.127	0.965	0.725	0.842	1.136	0.821	0.711	0.71	0.894	0.902
A6QPP2	SERPIND1 protein OS=Bos taurus OX=9913 GN=SERPIND1 PE=2 SV=1	12	1.397	1.073	1.227	1.21	1.096	1.084	1.188	0.841	1.348	1.029	1.296	1.493	1.04	1.06	1.432	0.655	1.251	1.044	0.987	1.268	0.927	1.031	1.144	1.156	1.269	0.899	1.004	1.193	1.046	1.173	1.297	1.122	1.061	0.848	1.097	0.793	0.907	0.955	1.073	0.797	1.053	1.015	1.563	0.854	0.825	1.039	0.995
Q32PJ2	Apolipoprotein A-IV OS=Bos taurus OX=9913 GN=APOA4 PE=2 SV=1	11	1.77	0.891	1.12	1.215	0.892	0.886	1.155	0.623	1.604	0.955	1.327	1.42	1.077	0.922	1.424	0.539	1.174	0.855	0.758	1.227	1.01	1.174	1.005	0.911	1.502	0.702	0.645	1.14	0.943	1.076	1.246	0.886	0.983	1.102	1.24	0.721	0.861	0.926	1.031	0.761	0.886	1.156	1.153	0.787	0.68	0.971	0.943
Q5EA67	Inter-alpha (Globulin) inhibitor H4 (Plasma Kallikrein-sensitive glycoprotein) OS=Bos taurus OX=9913 GN=ITIH4 PE=2 SV=1	11	1.119	1.242	0.86	0.841	1.187	1.296	1.133	1.505	0.913	1.078	0.911	0.985	0.782	1.611	1.292	1.223	0.977	0.895	0.848	0.98	1.849	1.317	0.882	1.025	0.972	2.272	1.251	0.828	1.004	0.878	0.855	1.013	0.963	0.607	0.667	0.875	0.764	0.777	0.845	0.781	1.961	0.704	0.772	0.817	0.688	0.667	0.923
Q3T052	Inter-alpha-trypsin inhibitor heavy chain H4 OS=Bos taurus OX=9913 GN=ITIH4 PE=1 SV=1	11	1.119	1.242	0.86	0.841	1.187	1.296	1.133	1.505	0.913	1.078	0.911	0.985	0.782	1.611	1.292	1.223	0.977	0.895	0.848	0.98	1.849	1.317	0.882	1.025	0.972	2.272	1.251	0.828	1.004	0.878	0.855	1.013	0.963	0.607	0.667	0.875	0.764	0.777	0.845	0.781	1.961	0.704	0.772	0.817	0.688	0.667	0.923
F1MMD7	Inter-alpha-trypsin inhibitor heavy chain H4 OS=Bos taurus OX=9913 GN=ITIH4 PE=4 SV=2	11	1.119	1.242	0.86	0.841	1.187	1.296	1.133	1.505	0.913	1.078	0.911	0.985	0.782	1.611	1.292	1.223	0.977	0.895	0.848	0.98	1.849	1.317	0.882	1.025	0.972	2.272	1.251	0.828	1.004	0.878	0.855	1.013	0.963	0.607	0.667	0.875	0.764	0.777	0.845	0.781	1.961	0.704	0.772	0.817	0.688	0.667	0.923
A4FUZ0	Keratin, type II cuticular Hb3 OS=Bos taurus OX=9913 GN=KRT83 PE=2 SV=1	11								0.936									1.128						2.522	1.149		3.635	4.64	0.95			0.976	1.174										0.857			0.879
P06868	Plasminogen OS=Bos taurus OX=9913 GN=PLG PE=1 SV=2	11	1.22	1.192	1.034	0.99	1.151	1.117	1.183	1.245	1.178	1.157	1.073	1.192	0.831	1.393	1.45	1.096	1.071	1.012	0.906	1.048	1.194	1.033	1.079	1.352	1.242	1.6	1.004	0.974	1.024	1.051	1.221	1.275	1.084	0.735	0.829	0.923	0.643	0.877	1.036	0.813	1.084	0.835	0.851	0.997	0.783	0.909	0.949
E1B726	Plasminogen OS=Bos taurus OX=9913 GN=PLG PE=3 SV=2	11						0.916		1.23								0.924	0.86		0.943			1.104	0.985			0.852		1.112			1.271				0.878							0.72	0.748
K4JR81	Alpha-2-macroglobulin variant 12 OS=Bos taurus OX=9913 GN=A2M PE=2 SV=1	10	1.169	1.089	1.107	1.193	0.985	0.98	1.14	0.813	1.318	1.164	1.222	1.376	0.853	1.071	1.308	0.679	1.088	1.079	0.921	1.357	0.966	1.052	1.106	0.911	1.039	1.375	0.996	1.126	1.04	0.993	1.209	0.947	1.235	1.003	0.914	0.812	1.037	0.974	0.977	0.885	1.084	1.369	0.9	0.925	0.937	0.957	0.883
K4JR88	Alpha-2-macroglobulin variant 22 OS=Bos taurus OX=9913 GN=A2M PE=2 SV=1	10	1.373	1.051	1.156	1.188	1.046	0.943	1.251	0.763	1.319	1.06	1.237	1.487	0.978	0.998	1.582	0.629	1.192	1.026	0.946	1.362	1.007	1.013	1.089	0.989	1.047	1.217	0.917	1.161	0.973	1.14	1.218	1.045	1.189	1.097	0.89	0.894	1.042	1.017	1.104	0.848	1.237	1.258	0.868	0.942	0.885	1.069	0.952
F1N076	Ceruloplasmin OS=Bos taurus OX=9913 GN=CP PE=1 SV=2	10	1.241	1.499	0.991	0.932	1.19	1.155	1.269	1.087	1.255	1.28	0.951	1.133	0.714	1.358	1.643	0.919	1.096	1.156	0.917	1.045	1.347	1.263	1.112	1.128	1.364	1.734	0.999	0.909	1.096	1.162	1.176	1.162	1.032	0.755	0.72	1.119	0.635	1.066	1.18	0.755	1.209	0.845	0.672	1.067	0.757	1.078	0.975
Q29RU4	Complement component C6 OS=Bos taurus OX=9913 GN=C6 PE=2 SV=1	10	1.153	1.117	0.881	1.178	1.096	0.944	0.934	1.113	1.284	1.136	0.989	1.183	0.721	1.66	1.112	0.653	1.164	1.127	0.841	1.264	1.304	1.054	1.097	1.028	1.322	1.308	0.937	1.07	0.876	0.899	1.069	1.003	0.95	0.853	0.842	0.83	0.816	0.923	1.077	0.708	1.411	0.904	0.791	0.752	0.753	0.93	0.96
F1MM86	Complement component C6 OS=Bos taurus OX=9913 GN=C6 PE=4 SV=1	10	1.153	1.117	0.881	1.178	1.096	0.944	0.934	1.113	1.284	1.136	0.989	1.183	0.721	1.66	1.112	0.653	1.164	1.127	0.841	1.264	1.304	1.054	1.097	1.028	1.322	1.308	0.937	1.07	0.876	0.899	1.069	1.003	0.95	0.853	0.842	0.83	0.816	0.923	1.077	0.708	1.411	0.904	0.791	0.752	0.753	0.93	0.96
F1N1I6	Gelsolin OS=Bos taurus OX=9913 GN=GSN PE=1 SV=1	9	1.267	1.016	1.177	1.161	0.982	1.077	1.278	0.804	1.271	1.074	1.214	1.473	0.939	0.973	1.487	0.741	1.312	1.128	0.987	1.252	1.076	1.104	1.075	1.11	1.098	1.054	1.01	1.184	0.914	1.001	1.157	1.085	1.206	0.769	0.854	1.015	0.934	0.995	1.081	0.86	1.203	0.978	0.705	0.963	0.903	0.934	1.063
Q148I8	Keratin 31 OS=Bos taurus OX=9913 GN=KRT31 PE=2 SV=1	9
Q148H4	Keratin, type II cuticular Hb1 OS=Bos taurus OX=9913 GN=KRT81 PE=2 SV=1	9								0.936									1.128						2.522	1.153		3.635	4.698	0.95			0.976	1.181										0.857			0.879
A5PJJ1	KRT33A protein OS=Bos taurus OX=9913 GN=KRT33A PE=2 SV=1	9								0.634									1.572						3.696	1.198		3.24	4.353	1.563			1.247	1.186										0.881			0.804
A3KN26	KRT33B protein OS=Bos taurus OX=9913 GN=KRT33B PE=2 SV=1	9
A7E350	PLG protein OS=Bos taurus OX=9913 GN=PLG PE=2 SV=1	9						0.916		1.23								0.924	0.86		0.943			1.104	0.985			0.852		1.112			1.271				0.878							0.72	0.748
Q6T182	Sex hormone-binding globulin (Fragment) OS=Bos taurus OX=9913 GN=SHBG PE=2 SV=1	9	1.425	0.945	1.257	1.05	0.84	0.827	1.196	0.759	1.426	0.972	1.372	1.53	1.073	0.986	1.385	0.708	1.256	0.821	0.811	1.295	1.381	1.313	1.171	1.136	1.474	0.884	0.993	1.104	1.069	1.196	1.11	1.082	1.116	0.972	1.046	0.966	1.033	1.018	0.998	0.933	1.341	0.961	0.976	0.859	0.763	1.175	1.064
A5PKC2	SHBG protein OS=Bos taurus OX=9913 GN=SHBG PE=2 SV=1	9	1.425	0.945	1.257	1.05	0.84	0.827	1.196	0.759	1.426	0.972	1.372	1.53	1.073	0.986	1.385	0.708	1.256	0.821	0.811	1.295	1.381	1.313	1.171	1.136	1.474	0.884	0.993	1.104	1.069	1.196	1.11	1.082	1.116	0.972	1.046	0.966	1.033	1.018	0.998	0.933	1.341	0.961	0.976	0.859	0.763	1.175	1.064
Q28194	Thrombospondin-1 (Fragment) OS=Bos taurus OX=9913 PE=2 SV=1	9	1.215	1.174	1.025	1.131	1.214	1.187	1.167	1.086	1.272	1.137	1.14	1.428	0.734	1.561	1.328	0.944	1.156	1.05	0.764	1.275	1.157	1.145	1.135	1.12	1.09	1.671	1.238	1.159	1.163	1.158	1.191	1.104	0.982	1.017	0.764	0.97	1.012	0.934	1.064	0.788	1.457	1.099	0.734	0.787	0.756	0.997	0.912
F1MSA6	Uncharacterized protein OS=Bos taurus OX=9913 GN=KRT34 PE=3 SV=1	9
F1MXG6	Uncharacterized protein OS=Bos taurus OX=9913 GN=LOC618455 PE=3 SV=1	9
G3N0V0	Uncharacterized protein OS=Bos taurus OX=9913 PE=1 SV=1	9	1.823	0.432	1.489	0.601	0.506	0.728	0.598	1.779	1.795	0.359	1.689	0.712	0.803	0.609	0.892	1.419	1.791	0.382	1.756	0.711	0.573	1.085	1.116	0.538	1.765	0.801	2.22	0.527	0.424	1.06	0.466	0.552	1.082	0.674	1.159	0.929	0.641	0.934	1.281	0.754	0.86	0.772	1.157	0.957	0.821	0.905	1.406
F1MJK3	Uncharacterized protein OS=Bos taurus OX=9913 PE=4 SV=2	9	1.384	0.945	1.184	1.208	0.986	1.094	1.335	0.751	1.395	0.898	1.245	1.514	1.079	1.148	1.483	0.62	1.235	1.02	0.933	1.41	0.963	0.914	1.124	1.091	1.07	1.037	1.085	1.35	0.908	1.102	1.214	1.107	1.2	0.972	1.038	0.769	1.006	0.951	0.966	0.852	1.128	1.142	0.878	0.797	0.845	0.955	0.878
F1MI18	Uncharacterized protein OS=Bos taurus OX=9913 PE=4 SV=2	9	1.384	0.945	1.184	1.208	0.986	1.094	1.335	0.751	1.395	0.898	1.245	1.514	1.079	1.148	1.483	0.62	1.235	1.02	0.933	1.41	0.963	0.914	1.124	1.091	1.07	1.037	1.085	1.35	0.908	1.102	1.214	1.107	1.2	0.972	1.038	0.769	1.006	0.951	0.966	0.852	1.128	1.142	0.878	0.797	0.845	0.955	0.878
Q3ZBS7	Vitronectin OS=Bos taurus OX=9913 GN=VTN PE=1 SV=1	9	1.588	0.913	1.32	1.268	1.145	1.129	1.187	0.71	1.587	0.771	1.502	1.496	1.004	0.92	1.436	0.54	1.375	0.893	1.057	1.429	0.9	1.041	0.975	1.085	1.254	0.808	1.002	1.24	0.871	1.113	1.069	1.08	1.064	0.939	1.196	0.874	1.016	0.974	1.069	0.723	1.003	1.062	0.971	0.839	0.879	1	0.947
K4JDS3	Alpha-2-macroglobulin variant 10 OS=Bos taurus OX=9913 GN=A2M PE=2 SV=1	8	0.942	1.075	1.064	1.189	0.933	1.037	1.064	0.833	1.277	1.139	1.202	1.413	0.827	1.113	1.176	0.664	1.007	1.031	0.926	1.371	0.892	1.094	1.088	0.816	0.966	1.341	0.956	1.101	1.108	0.866	1.142	0.869	1.235	0.938	0.923	0.735	1.033	0.908	0.921	0.886	0.906	1.301	0.859	0.897	0.956	0.877	0.826
P15497	Apolipoprotein A-I OS=Bos taurus OX=9913 GN=APOA1 PE=1 SV=3	8	1.534	1.123	1.316	1.341	1.047	1.023	1.202	0.628	1.522	1.051	1.413	1.412	1.041	0.769	1.469	0.602	1.11	0.913	0.701	1.251	0.757	0.963	1.038	1.074	1.117	0.61	0.9	1.1	0.979	1.101	1.142	1.125	1.034	1.01	1.251	0.793	0.997	1.183	1.116	0.808	1.05	1.416	1.148	0.896	0.824	1.231	1.074
Q693V9	Complement component 3d (Fragment) OS=Bos taurus OX=9913 PE=2 SV=1	8	1.154	1.265	1.04	1.143	1.335	1.043	1.304	1.005	1.127	1.273	1.099	1.464	0.963	0.884	1.535	0.809	1.227	1.205	0.906	1.418	1.035	1.067	1.136	1.06	1.024	1.274	1.098	1.244	1.07	1.091	1.167	1.077	0.979	0.736	0.832	0.914	0.906	1.025	0.979	0.73	1.135	0.833	0.855	0.96	0.762	1.009	0.958
Q29RQ1	Complement component C7 OS=Bos taurus OX=9913 GN=C7 PE=2 SV=1	8	1.041	0.984	0.9	1.065	0.964	0.94	1.03	1.162	0.981	0.944	1.204	1.253	0.93	1.245	1.171	0.821	1.166	0.888	0.87	1.305	1.198	1.194	0.924	0.923	0.877	1.233	0.924	0.93	0.916	1.116	0.845	1.198	1.013	0.675	0.631	0.876	0.906	0.775	0.986	0.819	1.122	1.013	0.794	1.027	0.718	0.922	0.944
F1MJH1	Gelsolin OS=Bos taurus OX=9913 GN=GSN PE=4 SV=1	8	1.269	1.024	1.175	1.161	0.976	1.091	1.284	0.805	1.263	1.097	1.209	1.481	0.924	0.971	1.477	0.746	1.304	1.149	0.992	1.253	1.069	1.112	1.052	1.113	1.075	1.065	1.007	1.179	0.9	0.992	1.139	1.085	1.223	0.767	0.859	1.023	0.924	0.984	1.092	0.859	1.195	0.981	0.699	0.97	0.905	0.922	1.077
F1MNW4	Inter-alpha-trypsin inhibitor heavy chain H2 OS=Bos taurus OX=9913 GN=ITIH2 PE=1 SV=2	8	1.371	1.033	1.281	1.268	1.04	1.028	1.293	0.861	1.356	1.024	1.483	1.564	0.985	0.663	1.544	0.701	1.364	1.003	0.934	1.433	0.772	1.059	1.143	1.163	1.19	0.789	0.914	1.21	0.929	1.175	1.204	1.21	1.05	0.852	0.946	0.838	0.943	1.054	1.131	0.814	0.802	1.041	0.918	0.927	0.829	1.09	1.014
A5D7R6	ITIH2 protein OS=Bos taurus OX=9913 GN=ITIH2 PE=2 SV=1	8	1.371	1.033	1.281	1.268	1.04	1.028	1.293	0.861	1.356	1.024	1.483	1.564	0.985	0.663	1.544	0.701	1.364	1.003	0.934	1.433	0.772	1.059	1.143	1.163	1.19	0.789	0.914	1.21	0.929	1.175	1.204	1.21	1.05	0.852	0.946	0.838	0.943	1.054	1.131	0.814	0.802	1.041	0.918	0.927	0.829	1.09	1.014
Q148J0	Keratin 34 OS=Bos taurus OX=9913 GN=KRT34 PE=2 SV=1	8
E1B898	Uncharacterized protein OS=Bos taurus OX=9913 GN=KRT86 PE=3 SV=1	8								0.901									1.12						2.522	1.134		3.544	4.743	0.95			0.976	1.166										0.89			0.879
E1B805	Uncharacterized protein OS=Bos taurus OX=9913 GN=LOC528040 PE=4 SV=2	8	1.369	1.118	1.175	1.286	1.147	1.081	1.374	1.073	1.137	1.2	1.251	1.359	0.983	0.894	1.548	0.79	1.061	1.115	0.929	1.239	1.072	1.15	1.19	1.076	1.094	1.444	0.966	1.167	1.109	1.046	1.157	1.105	1.034	0.778	1.001	0.793	0.864	1.21	1.092	0.805	1.251	0.804	0.858	0.988	0.822	1.045	1.05
Q0VCX1	Complement C1s subcomponent OS=Bos taurus OX=9913 GN=C1S PE=2 SV=2	7	1.334	0.901	1.173	1.167	0.801	1.046	1.055	0.981	1.151	1.158	1.295	1.451	0.922	0.93	1.304	0.776	1.147	1.142	1.044	1.221	1.349	1.22	1.164	0.999	1.094	1.319	1.141	1.139	0.858	1.063	1.052	1.081	1.047	0.791	0.743	0.799	0.997	0.754	1.081	0.772	1.095	1.079	0.903	1.008	0.794	1.023	0.941
F1MJ12	Complement C1s subcomponent OS=Bos taurus OX=9913 GN=C1S PE=3 SV=1	7	1.334	0.901	1.173	1.167	0.801	1.046	1.055	0.981	1.151	1.158	1.295	1.451	0.922	0.93	1.304	0.776	1.147	1.142	1.044	1.221	1.349	1.22	1.164	0.999	1.094	1.319	1.141	1.139	0.858	1.063	1.052	1.081	1.047	0.791	0.743	0.799	0.997	0.754	1.081	0.772	1.095	1.079	0.903	1.008	0.794	1.023	0.941
F1MX87	Complement C8 alpha chain OS=Bos taurus OX=9913 GN=C8A PE=4 SV=1	7	1.362	1.167	1.202	0.966	1.251	1.062	1.272	0.875	1.309	1.07	1.239	1.383	0.919	1.232	1.587	0.831	1.263	0.928	0.962	1.185	1.205	0.962	1.37	1.06	1.214	1.091	1.09	1.107	1.039	1.136	1.094	1.028	1.092	0.804	0.876	0.862	0.848	0.876	1.02	0.8	1.093	0.911	0.856	0.87	0.795	0.977	0.989
F1N045	Complement component C7 OS=Bos taurus OX=9913 GN=C7 PE=4 SV=1	7	1.041	0.967	0.9	1.065	0.925	0.94	1.03	1.339	0.981	0.944	1.204	1.253	0.93	1.245	1.171	0.821	1.226	0.888	0.87	1.305	1.198	1.194	0.924	0.923	0.877	1.245	0.924	0.93	0.916	1.116	0.845	1.198	1.013	0.675	0.631	0.876	0.906	0.775	0.986	0.819	1.122	0.863	0.794	1.027	0.718	0.922	0.839
Q3MHN2	Complement component C9 OS=Bos taurus OX=9913 GN=C9 PE=2 SV=1	7	1.21	1.201	1.032	1.017	1.22	1.065	0.991	1.469	1.102	0.915	1.15	1.147	0.983	1.675	1.447	0.804	0.988	0.912	0.869	1.061	1.628	1.162	0.995	1.059	1.06	2.071	1.354	0.954	1.076	0.917	0.996	1.004	1.119	0.752	0.886	0.834	0.74	0.807	0.848	0.746	1.563	0.738	0.809	0.762	0.725	0.833	0.999
F1N4M7	Complement factor I OS=Bos taurus OX=9913 GN=CFI PE=1 SV=2	7	1.267	1.276	1.139	1.019	1.36	1.061	1.212	1.197	1.217	1.053	1.169	1.375	0.972	1.177	1.469	0.878	1.082	0.94	0.958	1.145	1.307	1.126	1.081	1.172	0.973	1.291	1.041	1.088	1.09	1.067	1.154	1.126	1.094	0.763	0.777	0.871	0.898	0.893	0.983	0.847	1.062	0.82	0.87	0.963	0.859	1.019	0.924
Q32PI4	Complement factor I OS=Bos taurus OX=9913 GN=CFI PE=2 SV=1	7	1.267	1.276	1.139	1.019	1.36	1.061	1.212	1.197	1.217	1.053	1.169	1.375	0.972	1.177	1.469	0.878	1.082	0.94	0.958	1.145	1.307	1.126	1.081	1.172	0.973	1.291	1.041	1.088	1.09	1.067	1.154	1.126	1.094	0.763	0.777	0.871	0.898	0.893	0.983	0.847	1.062	0.82	0.87	0.963	0.859	1.019	0.924
Q3SX14	Gelsolin OS=Bos taurus OX=9913 GN=GSN PE=2 SV=1	7	1.269	1.024	1.175	1.161	0.976	1.091	1.284	0.805	1.265	1.097	1.209	1.481	0.924	0.971	1.477	0.746	1.304	1.149	0.992	1.257	1.069	1.112	1.052	1.113	1.075	1.065	1.007	1.179	0.901	0.988	1.139	1.085	1.223	0.769	0.859	1.023	0.926	0.984	1.092	0.855	1.195	0.981	0.699	0.97	0.905	0.922	1.077
Q3SZV7	Hemopexin OS=Bos taurus OX=9913 GN=HPX PE=2 SV=1	7	1.095	1.128	1.018	1.116	1.166	1.023	1.163	1.012	1.037	1.04	1.098	1.243	0.935	1.387	1.272	0.878	1.124	0.992	1.037	1.191	1.356	1.258	0.889	0.964	1.046	1.112	1.189	1.191	0.962	0.927	0.856	0.986	1.054	0.735	0.927	0.844	0.756	0.891	1.078	0.73	1.878	0.832	0.868	0.89	0.812	0.868	0.98
Q9BGU1	Histidine-rich glycoprotein OS=Bos taurus OX=9913 GN=BTHRG PE=2 SV=1	7	1.457	0.955	1.231	0.775	0.812	1.067	1.301	1.023	1.315	0.914	1.472	1.174	1.056	1.042	1.529	0.959	1.106	0.737	0.852	1.049	0.925	1.081	1.037	1.065	1.308	0.801	0.91	0.923	0.949	1.038	1.245	1.017	1.208	1.121	1.422	0.746	1.048	0.885	0.775	0.875	1.107	1.242	1.279	0.774	0.86	0.786	0.745
F1MKS5	Histidine-rich glycoprotein OS=Bos taurus OX=9913 GN=HRG PE=4 SV=2	7	1.457	0.955	1.231	0.775	0.812	1.067	1.301	1.023	1.315	0.914	1.472	1.174	1.056	1.042	1.529	0.959	1.106	0.737	0.852	1.049	0.925	1.081	1.037	1.065	1.308	0.801	0.91	0.923	0.949	1.038	1.245	1.017	1.208	1.121	1.422	0.746	1.048	0.885	0.775	0.875	1.107	1.242	1.279	0.774	0.86	0.786	0.745
Q1RMN8	Immunoglobulin light chain, lambda gene cluster OS=Bos taurus OX=9913 GN=IGL@ PE=2 SV=1	7	1.151	0.934	1.076	1.133	1.156	1.202	0.788	1.111	1.321	0.863	1.151	0.949	0.702	1.067	1.39	0.93	1.311	1.045	0.9	1.299	1.329	0.855	1.122	0.912	1.132	1.327	1.237	1.135	0.997	1.004	0.933	0.961	1.354	0.868	0.771	0.855	0.755	0.89	1.064	0.919	1.176	1.079	0.734	0.638	0.936	0.923	0.977
A6QNZ7	Keratin 10 (Epidermolytic hyperkeratosis; keratosis palmaris et plantaris) OS=Bos taurus OX=9913 GN=KRT10 PE=2 SV=1	7	1.798	2.174	1.063	1.834	1.291	0.963	1.006	0.97	1.38	1.027	1.11	1.287	2.815	1.884	2.303	0.557	1.062	0.779	0.727	1.589	1.515	0.915	0.865	1.699	0.997	1.28	0.915	1.627	1.447	1.623	0.977	1.049	1.242	1.974	1.04	0.793	1.54	0.67	1.099	1.21	1.754	0.893	0.993	1.019	0.908	0.684	1.539
Q0VD04	Keratin 85 OS=Bos taurus OX=9913 GN=KRT85 PE=2 SV=1	7
P06394	Keratin, type I cytoskeletal 10 OS=Bos taurus OX=9913 GN=KRT10 PE=3 SV=1	7	1.798	2.174	1.063	1.834	1.291	0.963	1.006	0.97	1.38	1.027	1.11	1.287	2.815	1.884	2.303	0.557	1.062	0.779	0.727	1.589	1.515	0.915	0.865	1.699	0.997	1.28	0.915	1.627	1.447	1.623	0.977	1.049	1.242	1.974	1.04	0.793	1.54	0.67	1.099	1.21	1.754	0.893	0.993	1.019	0.908	0.684	1.539
O46406	Primary amine oxidase, lung isozyme OS=Bos taurus OX=9913 PE=2 SV=1	7
Q2HJF0	Serotransferrin-like OS=Bos taurus OX=9913 GN=LOC525947 PE=2 SV=1	7	1.579	1.203	1.487	0.979	1.207	1.264	0.941	1.103	1.28	1.087	1.173	1.332	0.834	0.712	1.426	1.196	1.23	0.906	1.202	1.048	1.097	0.964	1.267	1.061	1.147	1.128	0.943	0.956	1.301	0.99	1.025	1.017	1.121	0.876	0.97	1.005	0.834	1	1.224	0.838	0.954	0.829	0.996	0.991	0.871	0.967	1.239
A5PJ69	SERPINA10 protein OS=Bos taurus OX=9913 GN=SERPINA10 PE=2 SV=1	7	1.392	1.162	1.248	1.159	1.321	1.11	1.093	0.9	1.259	1.148	1.774	1.413	1.094	1.204	1.313	0.862	1.217	0.893	0.917	1.197	0.939	1.233	0.955	1.21	1.373	0.991	1.179	1.252	1.117	1	1.18	1.144	1.033	0.851	1.013	0.905	0.839	0.922	1.223	0.765	1.473	1.011	1.042	0.92	0.828	0.937	1.121
F1MLW7	Uncharacterized protein OS=Bos taurus OX=9913 GN=LOC100297192 PE=1 SV=2	7
G5E5T5	Uncharacterized protein OS=Bos taurus OX=9913 PE=1 SV=1	7	1.326	0.734	1.191	1.166	0.891	1.373	1.139	0.708	1.331	0.727	1.343	1.55	0.864	0.876	1.358	0.542	1.566	0.802	1.167	1.37	0.94	1.228	0.936	1.22	0.873	0.643	1.084	1.032	0.772	0.967	0.985	1.167	1.281	0.778	0.668	0.874	0.871	0.948	1.007	0.894	1.311	0.934	0.652	0.93	0.95	0.959	0.917
G5E513	Uncharacterized protein OS=Bos taurus OX=9913 PE=1 SV=1	7	1.332	0.861	1.244	1.265	0.906	1.348	1.128	0.771	1.366	0.75	1.219	1.563	0.947	0.932	1.487	0.62	1.314	0.886	1.246	1.426	0.958	1.183	1.02	1.303	0.918	0.765	1.2	1.119	0.915	0.881	1.167	1.299	1.407	0.886	0.766	0.929	0.915	0.845	1.1	0.959	1.217	0.884	0.757	0.986	1.017	0.972	0.946
E1BFN5	Uncharacterized protein OS=Bos taurus OX=9913 PE=4 SV=2	7	1.039	1.261	1.059	1.007	1.404	1.171	1.093	1.045	0.894	1.161	1.255	1.216	0.867	0.957	1.419	0.874	1.122	1.239	0.868	1.058	1.091	1.192	1.159	1.092	0.858	1.37	0.937	0.997	1.048	0.917	1.272	1.118	1.165	0.791	0.809	0.907	0.853	0.956	1.096	0.826	1.304	1.102	0.838	1.037	0.898	0.933	1.049
I7CT57	Vitamin D binding protein OS=Bos taurus OX=9913 PE=2 SV=1	7	1.418	1.122	1.093	0.957	1.109	0.934	1.36	0.881	1.352	1.097	1.276	1.285	1.019	1.035	1.633	0.775	1.278	1.059	0.857	1.253	1.079	1.257	1.127	1.342	1.412	0.96	0.941	1.045	1.169	1.337	1.337	1.081	1.076	1.03	0.903	0.76	0.973	0.97	1.006	0.889	1.16	1.221	0.902	0.773	0.793	0.875	1.012
F1N5M2	Vitamin D-binding protein OS=Bos taurus OX=9913 GN=GC PE=3 SV=2	7	1.418	1.122	1.093	0.957	1.109	0.934	1.36	0.881	1.352	1.097	1.276	1.285	1.019	1.035	1.633	0.775	1.278	1.059	0.857	1.253	1.079	1.257	1.127	1.342	1.412	0.96	0.941	1.045	1.169	1.337	1.337	1.081	1.076	1.03	0.903	0.76	0.973	0.97	1.006	0.889	1.16	1.221	0.902	0.773	0.793	0.875	1.012
P28800	Alpha-2-antiplasmin OS=Bos taurus OX=9913 GN=SERPINF2 PE=1 SV=2	6	1.271	1.009	1.058	1.026	0.952	1	1.219	1.081	1.233	1.115	1.189	1.272	0.912	1.173	1.511	0.829	1.031	0.774	0.809	1.125	1.085	1.036	1.04	1.191	1.156	1.226	1.043	0.951	0.957	1.154	1.11	1.234	1.05	0.722	0.845	0.846	0.762	0.926	0.966	0.841	1.197	0.708	0.877	0.942	0.83	0.901	0.896
K4JF13	Alpha-2-macroglobulin variant 18 OS=Bos taurus OX=9913 GN=A2M PE=2 SV=1	6	0.901	1.117	1.086	1.189	0.893	1.009	1.133	0.81	1.237	1.142	1.197	1.435	0.914	1.093	1.227	0.659	1.02	1.053	0.92	1.373	0.839	0.984	1.095	0.794	0.914	1.465	0.957	1.091	1.019	0.856	1.148	0.841	1.203	0.942	0.84	0.741	1.019	0.891	0.994	0.893	0.869	1.313	0.834	0.921	0.974	0.889	0.788
K4JB97	Alpha-2-macroglobulin variant 4 OS=Bos taurus OX=9913 GN=A2M PE=2 SV=1	6	1.627	0.812	0.938	0.867	1.286	0.423	1.559	0.927	1.673	0.802	1.012	1.248	1.389	0.791	1.959	0.732	1.549	0.779	0.865	1.139	1.172	0.825	0.844	1.297	1.437	0.962	0.898	0.902	1.238	1.384	0.976	1.189	0.95	0.224	0.816	1.142	0.845	1.363	1.284	0.661	1.691	0.216	0.722	1.331	0.704	1.246	1.242
K4JDR8	Alpha-2-macroglobulin variant 5 OS=Bos taurus OX=9913 GN=A2M PE=2 SV=1	6	1.627	0.812	0.938	0.867	1.286	0.423	1.559	0.927	1.673	0.802	1.012	1.248	1.389	0.791	1.959	0.732	1.549	0.779	0.865	1.139	1.172	0.825	0.844	1.297	1.437	0.962	0.898	0.902	1.238	1.384	0.976	1.189	0.95	0.224	0.816	1.142	0.845	1.363	1.284	0.661	1.691	0.216	0.722	1.331	0.704	1.246	1.242
K4JBA2	Alpha-2-macroglobulin variant 9 OS=Bos taurus OX=9913 GN=A2M PE=2 SV=1	6	0.863	1.109	1.069	1.182	0.896	1.039	1.103	0.787	1.274	1.186	1.19	1.425	0.816	1.096	1.155	0.66	0.975	1.048	0.914	1.373	0.788	0.993	1.111	0.772	0.949	1.434	0.963	1.09	1.099	0.822	1.155	0.814	1.243	0.919	0.873	0.746	1.042	0.887	0.895	0.887	0.845	1.4	0.854	0.885	0.977	0.863	0.773
Q28107	Coagulation factor V OS=Bos taurus OX=9913 GN=F5 PE=1 SV=1	6	1.159	1.122	1.098	1.149	1.284	0.885	1.246	0.89	1.153	1.044	1.271	1.447	1.053	1.224	1.411	0.761	1.159	0.912	0.953	1.219	1.246	1.012	1.311	1.188	1.038	1.4	1.078	1.077	1.135	1.256	1.137	1.077	1.216	0.871	0.999	0.87	0.928	0.899	1.006	0.82	1.131	1.236	0.899	0.947	0.853	1.19	0.912
Q2KIH5	Complement component 8, alpha polypeptide OS=Bos taurus OX=9913 GN=C8A PE=2 SV=1	6	1.362	1.167	1.202	0.966	1.251	1.061	1.272	0.912	1.309	1.07	1.239	1.383	0.919	1.232	1.587	0.845	1.317	0.928	0.962	1.185	1.205	0.962	1.37	1.06	1.214	1.164	1.09	1.107	1.039	1.136	1.094	1.028	1.092	0.804	0.882	0.862	0.848	0.876	1.02	0.8	1.093	0.86	0.856	0.87	0.795	0.977	0.989
P23805	Conglutinin OS=Bos taurus OX=9913 GN=CGN1 PE=1 SV=2	6	1.559	0.879	1.408	1.604	0.863	0.965	1.619	0.532	1.469	1.088	1.434	1.93	1.163	0.838	2.354	0.496	2.316	1.43	1.258	2.127	0.546	0.604	1.069	1.151	0.873	0.807	0.81	1.497	0.797	0.766	1.132	1.222	1.427	0.59	0.495	0.75	1.276	0.957	0.925	0.727	0.283	0.748	0.84	0.886	1.077	0.883	0.92
A5PJT7	ECM1 protein OS=Bos taurus OX=9913 GN=ECM1 PE=2 SV=1	6	1.142	1.494	0.968	0.916	1.354	1.394	1.13	1.406	1.033	1.136	1.044	1.028	0.811	1.218	1.334	1.085	0.825	1.018	0.947	1.028	1.31	1.077	0.925	1.031	1.112	2.115	1.114	0.892	1.075	0.873	1.05	1.099	0.959	0.643	0.722	1.079	0.681	0.953	1.014	0.788	1.154	0.681	0.792	1.072	0.648	0.901	0.835
Q3T101	IGL@ protein OS=Bos taurus OX=9913 GN=IGL@ PE=1 SV=1	6	1.105	0.967	1.286	0.956	1.208	1.165	1.203	1.421	1.201	0.813	1.296	1.086	0.794	1.319	1.577	1.154	0.963	0.85	1.214	1.122	1.206	0.93	0.956	1.093	1.143	1.527	1.352	0.767	0.907	0.9	0.979	1.134	1.017	0.568	1.099	1.092	0.624	0.839	1.164	0.697	0.896	0.634	1.011	1.07	0.806	0.965	0.895
A4IFI0	IGLL1 protein OS=Bos taurus OX=9913 GN=IGLL1 PE=2 SV=1	6		1.302	0.946		1.55				1.295						1.046								1.165	0.967	1.449		1.208	0.79	1.361		0.871	1.085		0.645		0.946									0.58		0.863
P01044	Kininogen-1 OS=Bos taurus OX=9913 GN=KNG1 PE=1 SV=1	6	1.553	1.323	1.223	0.973	0.867	0.936	1.248	0.993	1.355	1.194	1.431	1.223	1.036	0.819	1.529	0.81	1.122	1.141	0.829	1.381	0.835	0.967	0.931	1.035	1.469	1.037	0.774	1.103	1.144	1.223	1.188	1.079	1	1.067	1.128	0.749	0.84	0.976	0.881	0.762	1.119	1.172	0.995	0.796	0.767	0.842	0.759
A0A140T8C8	Kininogen-1 OS=Bos taurus OX=9913 GN=KNG1 PE=4 SV=1	6	1.553	1.323	1.223	0.973	0.867	0.936	1.248	0.993	1.355	1.194	1.431	1.223	1.036	0.819	1.529	0.81	1.122	1.141	0.829	1.381	0.835	0.967	0.931	1.035	1.469	1.037	0.774	1.103	1.144	1.223	1.188	1.079	1	1.067	1.128	0.749	0.84	0.976	0.881	0.762	1.119	1.172	0.995	0.796	0.767	0.842	0.759
Q9TTE1	Serpin A3-1 OS=Bos taurus OX=9913 GN=SERPINA3-1 PE=1 SV=3	6	1.075	1.435	1.079	0.974	1.047	1.183	1.063	1.378	1.041	1.304	1.108	1.007	0.678	1.676	1.334	1.023	0.874	0.958	1.11	0.973	1.367	1.365	0.867	1.032	1.329	1.737	1.446	0.865	0.967	1.038	0.868	1.005	1.127	0.64	0.785	0.931	0.655	0.917	1.149	0.817	1.801	0.612	0.86	0.996	0.811	0.854	1.054
E1BI82	Uncharacterized protein OS=Bos taurus OX=9913 GN=LOC525947 PE=1 SV=2	6	1.603	1.263	1.461	0.959	1.174		0.993	1.103	1.212	1.145	1.226	1.338	0.792	0.747	1.413		1.202	0.926	1.464	0.998	1.051	1.055	1.256	0.975	1.16	1.16	0.882	0.944	1.196	0.978	0.971	1.002	1.124	0.789		1.004	0.802	0.988	1.158	0.866	0.989	0.799	0.968	0.931	0.908	0.914	1.204
A6QM09	Uncharacterized protein OS=Bos taurus OX=9913 PE=2 SV=1	6						1.889		0.837								0.96	0.734		0.611	0.878		0.558	2.808			1.294		0.625		0.708	0.958				1.081		2.839			0.759		0.381	0.416
Q3MHN5	Vitamin D-binding protein OS=Bos taurus OX=9913 GN=GC PE=2 SV=1	6	1.399	1.114	1.082	1.015	1.108	0.926	1.387	0.864	1.354	1.091	1.262	1.301	1.035	0.956	1.651	0.764	1.297	1.038	0.836	1.253	1.049	1.28	1.118	1.342	1.423	0.903	0.941	1.013	1.198	1.337	1.354	1.081	1.056	1.059	0.9	0.734	0.973	0.964	0.998	0.889	1.178	1.254	0.923	0.783	0.793	0.907	1.043
Q3MHH8	Alpha-amylase OS=Bos taurus OX=9913 GN=AMY2A PE=2 SV=1	5	1.285	1.071	1.512	1.268	1.109	1.105	0.996	1.093	1.556	0.969	1.363	1.356	1.094	1.234	1.515	0.76	1.375	1.245	1.102	1.317	1.09	1.062	1.242		1.276	1.326		1.141	0.811	1.084	1.519		1.13	2.166	1.015	1.06	0.957	0.895	0.919	0.813	1.255	0.967	1.138	0.93		0.961	0.965
F1MJQ3	Alpha-amylase OS=Bos taurus OX=9913 GN=AMY2B PE=3 SV=1	5	1.285	1.071	1.512	1.268	1.109	1.105	0.996	1.093	1.556	0.969	1.363	1.356	1.094	1.234	1.515	0.76	1.375	1.245	1.102	1.317	1.09	1.062	1.242		1.276	1.326		1.141	0.811	1.084	1.519		1.13	2.166	1.015	1.06	0.957	0.895	0.919	0.813	1.255	0.967	1.138	0.93		0.961	0.965
E1BC10	Amine oxidase OS=Bos taurus OX=9913 GN=AOC3 PE=3 SV=1	5	0.994								1.156	1.037											1.313			0.929			1.018		1.22			0.954	0.906	1.019							0.908				0.73
E1BD43	Amine oxidase OS=Bos taurus OX=9913 GN=AOC3 PE=3 SV=1	5	0.994								1.156	1.037											1.313			0.929			1.018		1.22			0.954	0.906	1.019							0.908				0.73
Q3SZH5	Angiotensinogen OS=Bos taurus OX=9913 GN=AGT PE=1 SV=1	5	1.36	0.934	1.223	1.016	1.309	1.167	1.157	1.025	1.236	0.919	1.115	1.266	0.941	1.5	1.931	0.773	1.209	0.835	0.914	1.011	1.517	1.151	1.087	1.091	1.649	1.116	1.088	1.11	0.852	1.132	1.018	1.038	1.085	0.876	0.994	1.179	0.735	0.728	0.94	0.814	1.188	0.869	1.047	0.746	0.765	0.919	1.325
A5D9E9	Complement C1r subcomponent precursor OS=Bos taurus OX=9913 GN=C1R PE=2 SV=1	5		1.175	1.222	1.14	1.079		1.039	1.024	1.235		0.95	1.313	0.983	1.676	1.353		1.346	0.848	0.985	1.434		1.131	1.157	1.138	1.308	1.205	1.24	1.346	1.139	1.293	1.222	1.15		0.792		0.926	1.01	0.696	0.893	0.878		0.849	0.853	0.793	0.915	0.963	1.252
F1N102	Complement C8 beta chain OS=Bos taurus OX=9913 GN=C8B PE=4 SV=2	5	1.223	1.199	1.037	1.106	1.392	1.089	1.185	1.181	1.269	1.161	1.247	1.306	1.003	1.201	1.301	1.062	1.108	1.223	0.972	1.235	1.395	1.127	1.167	1.143	1.19	1.472	0.996	1.026	1.155	1.088	1.197	1.153	1.093	0.673	0.86	0.919	0.909	0.996	1.072	0.814	1.018	0.719	0.844	0.9	0.799	0.985	0.906
A5D9D2	Complement component 4 binding protein, alpha chain OS=Bos taurus OX=9913 GN=C4BPA PE=2 SV=1	5	1.259	1.264	1.071	1.164	1.296	1.147	1.248	0.867	1.212	1.182	0.975	1.428	1.17	1.482	1.544	0.733	1.285	1.139	0.851	1.16	1.145	1.004	1.253	1.065	1.15	1.201	0.863	1.157	1.192	0.946	1.296	1.18	1.088	0.856	0.963	0.783	0.873	0.785	1.133	0.812	1.139	1.028	0.937	0.923	0.812	0.804	1.028
P50448	Factor XIIa inhibitor OS=Bos taurus OX=9913 PE=1 SV=1	5	1.192	1.252	1.112	1.229	1.235	1.223	1.225	1.062	1.225	1.065	1.226	1.549	0.936	1.6	1.429	0.808	1.102	0.976	0.839	1.343	1.237	0.985	1.197	1.103	0.959	1.315	0.968	1.165	1.037	1.02	1.128	1.13	1.128	0.844	0.87	0.871	0.832	0.91	0.995	0.797	1.344	0.996	0.923	0.954	0.834	0.876	0.918
Q71U44	Fibronectin (Fragment) OS=Bos taurus OX=9913 PE=2 SV=1	5	1.276	1.112	1.161	1.181	0.964	1.096	1.175	1.188	1.414	1.027	1.466	1.428	1.078	0.917	1.505	0.858	1.266	0.847	1.061	1.178	1.267	0.949	1.07	1.087	1.191	1.069	1.042	1.162	1.081	1.028	1.097	1.075	1.136	0.95	0.853	1.064	0.923	0.963	1.104	0.807	1.116	1.163	0.872	1.19	0.729	0.911	1.077
F1MYN5	Fibulin-1 OS=Bos taurus OX=9913 GN=FBLN1 PE=1 SV=2	5	1.606	1.353	0.994		0.991	1.026	1.046	0.906		1.302	0.95	1.33	0.991	1.383	1.467	0.649	1.414		1.006	1.317	1.395	1.239		1.206	0.786	1.55	0.932			0.867		1.246	1.221		0.838	0.932	0.957	0.645		0.973	1.181	0.932	0.796	0.941	0.866		1.031
A5D7S8	Fibulin-1 OS=Bos taurus OX=9913 GN=FBLN1 PE=2 SV=1	5	1.606	1.353	0.994		0.991	1.026	1.046	0.906		1.302	0.95	1.33	0.991	1.383	1.467	0.649	1.414		1.006	1.317	1.395	1.239		1.206	0.786	1.55	0.932			0.867		1.246	1.221		0.838	0.932	0.957	0.645		0.973	1.181	0.932	0.796	0.941	0.866		1.031
A5PK49	IGL@ protein OS=Bos taurus OX=9913 GN=IGL@ PE=2 SV=1	5	0.939	0.748	1.145	1.015	1.162	1.388	0.603	1.316	1.185	0.561	1.346	0.729	0.497	1.105	1.494	1.123	1.135	0.488	1.061	1.388	1.508	0.663	1.021	0.861	0.965	0.608	1.382	1.297	1.063	1.145	1.098	0.897	1.509	0.603	0.833	0.97	0.879	0.951	1.069	0.958	1.019	0.886	0.877	0.543	1.01	0.973	1.005
F1MNV5	Kininogen-1 OS=Bos taurus OX=9913 GN=KNG1 PE=4 SV=2	5	1.553	1.323	1.229	0.968	0.867	0.93	1.249	0.997	1.356	1.194	1.431	1.215	1.024	0.819	1.526	0.801	1.127	1.144	0.835	1.387	0.835	0.959	0.921	1.032	1.487	1.038	0.772	1.099	1.118	1.233	1.188	1.083	1	1.065	1.139	0.745	0.834	0.976	0.878	0.759	1.119	1.177	1.01	0.79	0.769	0.835	0.759
P01045	Kininogen-2 OS=Bos taurus OX=9913 GN=KNG2 PE=1 SV=1	5	1.45	1.159	1.157	1.269	1.146	0.94	1.159	1.01	1.355	1.111	1.285	1.491	0.946	0.773	1.479	0.811	1.099	0.998	0.819	1.381	0.96	0.948	1.074	0.959	1.337	1.067	0.73	1.315	1.144	1.223	1.133	1.01	0.948	1.067	0.916	0.882	0.84	1.079	1.159	0.762	0.881	1.208	0.794	0.956	0.707	1.025	1.021
A4FV94	KRT6A protein OS=Bos taurus OX=9913 GN=KRT6A PE=2 SV=1	5	1.371	2.748			1.232		0.585	0.703	1.661	0.992	0.801	1.236	2.35	1.901			1.166		0.896		0.947	1.137				0.955			2.144				0.943	2.634				0.553			1.104	0.971	1.131	0.941			1.723
A1A4M3	KRT86 protein (Fragment) OS=Bos taurus OX=9913 GN=KRT86 PE=2 SV=1	5								0.901									1.16						1.592	1.161		3.435	4.472	0.83			0.982	1.154										0.895			0.891
Q2KIF2	Leucine-rich alpha-2-glycoprotein 1 OS=Bos taurus OX=9913 GN=LRG1 PE=1 SV=1	5	1.254	1.289	1.132	1.088	1.136	1.024	1.034	1.124	1.399	1.189	1.189	1.318	0.862	1.279	1.265	0.833	1.271	1.302	1.056	1.234	1.425	1.085	1.141	1.239	1.359	1.659	1.061	1.308	1.036	1.088	1.156	1.241	1.083	1.082	0.962	0.822	0.979	0.859	1.003	0.744	1.267	0.892	0.876	0.781	0.733	0.91	0.931
Q2TBI0	Lipopolysaccharide-binding protein OS=Bos taurus OX=9913 GN=LBP PE=2 SV=1	5	1.125	1.123			1.143	1.195		1.287	1.166	1.015						1.144	1.309		1.054		1.574	1.482	0.899	0.942		1.94	1.248	0.95	1.06		0.815	0.674	1.024	0.722	0.625						2.407	0.665	0.81		0.818		1.017
F1MNN7	Lipopolysaccharide-binding protein OS=Bos taurus OX=9913 GN=LBP PE=4 SV=1	5	1.125	1.123			1.143	1.195		1.287	1.166	1.015						1.144	1.309		1.054		1.574	1.482	0.899	0.942		1.94	1.248	0.95	1.06		0.815	0.674	1.024	0.722	0.625						2.407	0.665	0.81		0.818		1.017
Q9TTK6	Membrane primary amine oxidase OS=Bos taurus OX=9913 GN=AOC3 PE=2 SV=3	5	0.994								1.156	1.037											1.313			0.929			1.018		1.22			0.954	0.906	1.019							0.908				0.73
Q58CQ9	Pantetheinase OS=Bos taurus OX=9913 GN=VNN1 PE=1 SV=1	5	1.744	0.772	1.428	1.236	1.245	1.088	1.331	0.612	1.579	0.781	1.709	1.468	1.127	1.237	1.616	0.439	0.933	0.777	0.682	1.398	0.983	0.78	1.282	0.533	1.018	0.75	1.101	1.875	1.141	1.41	2.2	0.582	1.09	1.04	1.121	0.578	1.461	0.944	0.966	0.788	0.945	0.894	1.069	0.769	0.802	1.266	0.748
A0A140T891	Pantetheinase OS=Bos taurus OX=9913 GN=VNN1 PE=4 SV=1	5	1.744	0.772	1.428	1.236	1.245	1.088	1.331	0.612	1.579	0.781	1.709	1.468	1.127	1.237	1.616	0.439	0.933	0.777	0.682	1.398	0.983	0.78	1.282	0.533	1.018	0.75	1.101	1.875	1.141	1.41	2.2	0.582	1.09	1.04	1.121	0.578	1.461	0.944	0.966	0.788	0.945	0.894	1.069	0.769	0.802	1.266	0.748
A2I7M9	Serpin A3-2 OS=Bos taurus OX=9913 GN=SERPINA3-2 PE=3 SV=1	5	1.072	1.435	1.079	0.974	1.047	1.183	1.063	1.378	1.041	1.305	1.108	1.007	0.678	1.676	1.334	1.024	0.874	0.958	1.11	0.973	1.366	1.365	0.867	1.032	1.329	1.737	1.446	0.865	0.967	1.038	0.868	1.005	1.126	0.64	0.784	0.931	0.655	0.917	1.149	0.817	1.805	0.612	0.86	0.996	0.811	0.854	1.054
M0QVY0	Uncharacterized protein OS=Bos taurus OX=9913 GN=KRT6A PE=3 SV=1	5	1.371	2.748			1.232		0.585	0.703	1.661	0.992	0.801	1.236	2.35	1.901			1.166		0.896		0.947	1.137				0.955			2.144				0.943	2.634				0.553			1.104	0.971	1.131	0.941			1.723
F1MCF8	Uncharacterized protein OS=Bos taurus OX=9913 GN=LOC100297192 PE=1 SV=2	5	0.939	0.748	1.145	1.015	1.162	1.388	0.603	1.316	1.185	0.561	1.346	0.729	0.497	1.105	1.494	1.123	1.135	0.488	1.061	1.388	1.508	0.663	1.021	0.861	0.965	0.608	1.382	1.297	1.063	1.145	1.098	0.897	1.509	0.603	0.833	0.97	0.879	0.951	1.069	0.958	1.019	0.886	0.877	0.543	1.01	0.973	1.005
G3X7V4	Uncharacterized protein OS=Bos taurus OX=9913 GN=LOC787600 PE=3 SV=1	5								0.812									1.163						2.964	1.247		2.481	3.695	1.007			0.973	1.237										0.989			0.956
G5E604	Uncharacterized protein OS=Bos taurus OX=9913 PE=1 SV=1	5	1.629	1.031	0.864	1.509	0.912	0.729	1.213	0.933	1.523	0.818	0.708	1.544	0.705	1.269	1.406	0.646	1.624	0.69	0.78	1.517	1.007	0.899	0.897	0.723	1.366	1.539	0.632	1.163	0.748	0.58	0.915	0.726	1.681	1.262	0.525	0.699	0.504	0.441	1.533	1.194	1.66	1.119	0.653	0.641	1.288	0.547	1.183
A5PK72	Uncharacterized protein OS=Bos taurus OX=9913 PE=2 SV=1	5	0.939	0.748	1.145	1.015	1.162	1.388	0.603	1.316	1.185	0.561	1.346	0.729	0.497	1.105	1.494	1.123	1.135	0.488	1.061	1.388	1.508	0.663	1.021	0.861	0.965	0.608	1.382	1.297	1.063	1.145	1.098	0.897	1.509	0.603	0.833	0.97	0.879	0.951	1.069	0.958	1.019	0.886	0.877	0.543	1.01	0.973	1.005
A6H7J7	Uncharacterized protein OS=Bos taurus OX=9913 PE=2 SV=1	5	0.939	0.748	1.145	1.015	1.162	1.388	0.603	1.316	1.185	0.561	1.346	0.729	0.497	1.105	1.494	1.123	1.135	0.488	1.061	1.388	1.508	0.663	1.021	0.861	0.965	0.608	1.382	1.297	1.063	1.145	1.098	0.897	1.509	0.603	0.833	0.97	0.879	0.951	1.069	0.958	1.019	0.886	0.877	0.543	1.01	0.973	1.005
Q3ZCH5	Zinc-alpha-2-glycoprotein OS=Bos taurus OX=9913 GN=AZGP1 PE=2 SV=1	5	1.24	1.017	1.222	1.171	1.084	1.017	1.014	1.206	1.178	0.852	1.283	1.45	0.817	1.22	1.277	0.682	1.107	0.898	0.972	1.345	1.2	1.116	1.133	1.007	1.222	1.238	0.992	1.112	1.146	1.208	1.137	1.111	1.223	0.804	0.937	0.754	1.096	0.913	1.172	0.992	1.355	0.685	1.009	0.888	0.977	0.983	1.022
G3MYZ3	Afamin OS=Bos taurus OX=9913 GN=AFM PE=1 SV=1	4								0.797									1.059		0.947			1.413				1.19																1.501	0.856
Q28921	Alpha 1-antichymotrypsin (Fragment) OS=Bos taurus OX=9913 GN=alpha 1-antichymotrypsin/ ACT PE=2 SV=1	4	1.056	1.421	1.04	0.975	1.012	1.182	1.068	1.386	1.023	1.264	1.092	0.995	0.659	1.66	1.3	1.022	0.873	0.955	1.104	0.987	1.346	1.365	0.834	1.03	1.334	1.751	1.453	0.85	0.943	1.037	0.839	1.003	1.122	0.633	0.772	0.921	0.67	0.897	1.16	0.827	1.824	0.604	0.842	1.008	0.816	0.868	1.055
K4JBR9	Alpha-2-macroglobulin variant 6 OS=Bos taurus OX=9913 GN=A2M PE=2 SV=1	4	1.528	1.174	1.249	1.25	1.098	0.887	1.274	0.751	1.321	1.19	1.235	1.479	1.093	1.027	1.772	0.665	1.228	1.069	0.914	1.352	1.276	1.015	1.202	0.996	1.033	1.245	0.956	1.158	1.035	1.127	1.265	1.034	1.211	1.213	0.771	0.977	1.002	0.972	1.284	0.837	1.215	1.241	0.847	1.001	0.926	1.064	1.002
E1BJN3	Amine oxidase OS=Bos taurus OX=9913 PE=3 SV=1	4	1.181	1.209	1.241	1.05	1.252	1.102	1.241	0.899	1.223	1.015	1.244	1.323	1.048	1.06	1.56	0.808	1.104	0.976	1.003	1.256	0.929	1.162	1.077	1.01	1.263	0.813	1.023	1.024	1.052	1.17	1.141	1.046	1	0.938	0.96	0.95	0.909	1.113	1.193	0.756	1.248	1.089	0.88	0.989	0.863	1.01	1
G3MX04	Amine oxidase OS=Bos taurus OX=9913 PE=3 SV=1	4
F1MSZ6	Antithrombin-III OS=Bos taurus OX=9913 GN=SERPINC1 PE=3 SV=1	4	1.305	1.283	1.076	1.159	1.059	1.063	1.249	0.719	1.531	1.197	1.247	1.356	0.973	0.951	1.445	0.813	1.213	0.883	0.778	1.446	0.885	0.813	1.082	0.998	1.292	0.516	0.863	1.192	0.99	1.22	1.243	1.079	0.921	0.954	0.936	0.783	0.995	1.016	1.133	0.808	1.01	1.379	0.876	0.868	0.762	0.985	0.927
V6F869	Apolipoprotein A-I-like OS=Bos taurus OX=9913 GN=LOC100297695 PE=3 SV=1	4	1.586	1.141	1.378	1.319	1.063	1.109	1.119	0.708	1.652	1.109	1.417	1.322	1.021	0.754	1.431	0.675	1.011	0.863	0.583	1.091	0.679	0.855	1.033	1.047	1.116	0.707	0.938	0.982	1.05	1.035	1.03	1.117	0.986	1.134	1.38	0.881	0.911	1.21	1.148	0.769	0.815	1.494	1.222	0.935	0.776	1.274	1.16
Q28065	C4b-binding protein alpha chain OS=Bos taurus OX=9913 GN=C4BPA PE=2 SV=1	4	1.199	1.253	1.114	1.105	1.304	1.034	1.179	0.912	1.078	1.171	0.996	1.368	1.211	1.409	1.512	0.743	1.23	1.065	0.942	1.16	1.127	1.12	1.118	1.014	1.107	1.284	1.087	1.047	1.15	0.946	1.244	1.041	1.08	0.747	0.938	0.796	0.873	0.857	1.076	0.812	1.251	0.968	0.944	0.858	0.79	0.868	0.895
F1N0I3	Coagulation factor V OS=Bos taurus OX=9913 GN=F5 PE=3 SV=2	4	1.027	1.074	1.098	1.149	1.292	0.885		0.843	1.153	0.905	1.249			1.256	1.411	0.761	1.126	0.912	0.953	1.219	1.189	1.012	1.311	1.145	1.038	1.209	1.105	1.077	1.135	1.256	1.137	1.125	1.284	0.871	0.999	0.87	0.928	0.868	1.006	0.82	1.087	1.226	0.899		0.895	1.19	0.902
Q2TBQ1	Coagulation factor XIII B chain OS=Bos taurus OX=9913 GN=F13B PE=2 SV=1	4		1.187	0.925	1.234	1.294		1.11					1.647	1.226		1.128			1.19		1.352			0.865	1.175	0.859		1.076	0.836		0.872	0.895	1.274				0.724	1.111		0.949	0.745				0.96	1.07	0.905	1.141
Q2KIV9	Complement C1q subcomponent subunit B OS=Bos taurus OX=9913 GN=C1QB PE=1 SV=1	4	1.489	1.178	1.503	1.018	1.212	1.146	0.985		1.28	1.162	1.307	1.196	0.975	1.247	1.796	1.124		0.943	1.396	1.339	1.264	1.043	1.1	1.109	1.244		1.208	1.162	1.164	1.193	1.212	1.119	1.227	0.801	0.656	0.782	0.981	1.021	0.929	0.964	1.327		0.827	0.889	0.952	0.878	1.037
Q3SYW2	Complement C2 OS=Bos taurus OX=9913 GN=C2 PE=2 SV=1	4	1.257	1.095		1.05	1.228		0.92	0.965	1.334	0.984		1.156	0.848				1.257	1.073	0.969		1.835	0.97				1.092			1.58				1.084	0.823					1.168		1.057	0.746	0.957	1.065		1.088	0.945
Q0V7N2	Complement C2 OS=Bos taurus OX=9913 GN=C2 PE=2 SV=1	4	1.257	1.095		1.05	1.228		0.92	0.965	1.334	0.984		1.156	0.848				1.257	1.073	0.969		1.835	0.97				1.092			1.58				1.084	0.823					1.168		1.057	0.746	0.957	1.065		1.088	0.945
A0A0A0MP91	Complement C2 OS=Bos taurus OX=9913 GN=C2 PE=3 SV=1	4	1.257	1.095		1.05	1.228		0.92	0.965	1.334	0.984		1.156	0.848				1.257	1.073	0.969		1.835	0.97				1.092			1.58				1.084	0.823					1.168		1.057	0.746	0.957	1.065		1.088	0.945
O97941	Complement component 3 (Fragment) OS=Bos taurus OX=9913 PE=2 SV=1	4	1.178	1.361	1.052	1.103	1.364	1.031	1.171	0.979	1.089	1.236	1.175	1.389	0.94	0.907	1.502	0.774	1.086	1.144	0.936	1.375	1.045	1.031	1.091	0.997	1.04	1.236	1.036	1.131	1.224	1.026	1.155	1.026	1	0.698	0.872	0.956	0.847	0.977	0.964	0.783	1.105	0.892	0.85	1.093	0.809	0.898	0.977
E1BF81	Corticosteroid-binding globulin OS=Bos taurus OX=9913 GN=SERPINA6 PE=3 SV=1	4		0.902	1.083	1.181	1.473			0.88			0.959			1.106	1.835		1.001	0.9	0.841	0.896		1.032	1.612	1.116	1.031	0.923	1.329	1.306		1.16	1.2	0.976				1.13	0.744	1.005	1.317	0.784		1.147	0.72		0.622	1.01	0.818
A6QP30	CPN2 protein OS=Bos taurus OX=9913 GN=CPN2 PE=2 SV=1	4	1.278	1.015	1.065	1.136	1.088	1.2	1.031	0.976	1.207	1.124	1.103	1.395	0.998	1.365	1.301	0.851	1.144	0.862	0.91	1.264	1.525	1.087	0.834	1.105	1.208	1.24	1.096	1.203	1.023	1.147	1.033	1.13	1.04	1.077	0.845	0.981	0.851	0.965	1.072	0.642	1.478	1.014	0.943	0.959	0.671	1.047	1.032
Q3SZQ8	Endopin 2 OS=Bos taurus OX=9913 GN=SERPINA3-7 PE=2 SV=1	4	1.355	1.005	1.316	1.075	1.196	1.239	1.35	1.493	1.115	1.072	1.159	1.198	0.887	1.265	1.756	0.999	1.188	0.995	1.212	1.059	1.187	1.214	1.027	1.017	1.399	1.306	0.884	0.879	1.264	2.238	1.165	1.078	1.327	0.651	0.951	1.262	1.199	1.118	1.116	1.484	1.742	0.821	0.809	1.084	0.815	0.917	1.036
Q5J801	Endopin 2B OS=Bos taurus OX=9913 PE=2 SV=1	4	1.355	1.005	1.316	1.075	1.196	1.239	1.35	1.493	1.115	1.072	1.159	1.198	0.887	1.265	1.756	0.999	1.188	0.995	1.212	1.059	1.187	1.214	1.027	1.017	1.399	1.306	0.884	0.879	1.264	2.238	1.165	1.078	1.327	0.651	0.951	1.262	1.199	1.118	1.116	1.484	1.742	0.821	0.809	1.084	0.815	0.917	1.036
Q32T06	Endopin 2C OS=Bos taurus OX=9913 PE=2 SV=1	4	0.471	0.636	1.627	1.484	0.683	1.85	0.556	0.605	0.485	0.444	1.609	1.477	0.467	2.211	0.633	0.54	0.474	0.381	1.967	1.379	0.617	0.474	0.368	1.411	0.463	0.567	2.129	1.179	0.549	0.534	0.422	1.346	1.597	0.285	0.433	2.038	0.721	0.504	1.96	1.285	0.649	0.333	0.384	1.957	1.046	0.455	1.929
E1BMJ0	Factor XIIa inhibitor precursor OS=Bos taurus OX=9913 GN=SERPING1 PE=3 SV=2	4	1.192	1.252	1.112	1.229	1.235	1.223	1.225	1.041	1.225	1.065	1.226	1.549	0.936	1.6	1.429	0.808	1.092	0.976	0.839	1.343	1.237	0.985	1.197	1.103	0.959	1.277	0.968	1.165	1.037	1.02	1.128	1.13	1.128	0.844	0.87	0.871	0.832	0.91	0.995	0.797	1.344	1.001	0.923	0.954	0.834	0.876	0.918
P02672	Fibrinogen alpha chain OS=Bos taurus OX=9913 GN=FGA PE=1 SV=5	4	1.134	1.092	0.985	1.041	1.033	1.032	1.099	1.382	1.133	1.129	1.172	1.144	0.689	1.064	1.441	0.924	0.984	0.948		1.227	1.682		1.172	1.039	1.073	2.36	1.206	1.1	1.107	1.046	1.216	1.005	0.943	0.626	0.797	0.905	0.837	0.962	0.961	0.782	1.607	0.766		0.89	0.76	0.94	0.919
A5PJE3	Fibrinogen alpha chain OS=Bos taurus OX=9913 GN=FGA PE=2 SV=1	4	1.134	1.092	0.985	1.041	1.033	1.032	1.099	1.382	1.133	1.129	1.172	1.144	0.689	1.064	1.441	0.924	0.984	0.948		1.227	1.682		1.172	1.039	1.073	2.36	1.206	1.1	1.107	1.046	1.216	1.005	0.943	0.626	0.797	0.905	0.837	0.962	0.961	0.782	1.607	0.766		0.89	0.76	0.94	0.919
Q95KV5	Fibronectin (Fragment) OS=Bos taurus OX=9913 GN=FN PE=2 SV=1	4	1.281	1.013	1.205	1.151	0.979	1.087		1.144	1.407	1.01	1.466			0.917	1.556	0.842	1.239	0.914	1.045	1.147	1.266	0.974	1.078	1.068	1.204	1.063	1.035	1.17	1.041	1.009	1.08	1.038	1.141	0.953	0.851	1.067	0.907	0.963	1.064	0.798	1.119	1.112	0.886		0.7	0.966	1.084
Q95KV4	Fibronectin (Fragment) OS=Bos taurus OX=9913 GN=FN PE=2 SV=1	4	1.208	1.099	1.212	1.151	1.003	1.136		1.015	1.25	1.047					1.587	0.961	1.158	0.914	1.045		1.305	0.974			1.244	1.043			1.186				1.071	0.81	0.724	1.065			1.064		1.094	0.965	0.886			0.966	1.001
D4QBB4	Globin A1 OS=Bos taurus OX=9913 GN=HBB PE=3 SV=1	4	4.271	0.842	2.001	0.363	1.082	0.557	0.879	0.588	1.867	0.877	1.198	1.958	0.82	0.818	0.664	0.38	0.849	0.201	0.774	1.623	0.938	1.167	0.879	0.355	0.353	1.267	0.459	5.1	0.738	0.453	0.684	0.423	0.747	3.208	1.026	0.408	3.098	0.38	0.592	0.64	0.816	0.434	0.941	0.368	1.076	0.338	0.922
Q2TBU0	Haptoglobin OS=Bos taurus OX=9913 GN=HP PE=2 SV=1	4	0.992	0.504	0.102	0.168	1.704	1.517	0.107	2.28	0.687	0.722	0.777	0.121	0.081	3.923	0.115	2.022	0.614	0.125	0.922	0.144	3.819	0.518	0.463	0.41	0.101	2.642	2.628	0.429	0.967	0.094	0.425	0.427	0.764	0.435	0.492	0.097	0.083	0.546	0.158	0.086	3.23	0.393	0.47	0.101	0.269	0.18	0.534
G3X6K8	Haptoglobin OS=Bos taurus OX=9913 GN=HP PE=3 SV=1	4	0.992	0.504	0.102	0.168	1.704	1.517	0.107	2.28	0.687	0.722	0.777	0.121	0.081	3.923	0.115	2.022	0.614	0.125	0.922	0.144	3.819	0.518	0.463	0.41	0.101	2.642	2.628	0.429	0.967	0.094	0.425	0.427	0.764	0.435	0.492	0.097	0.083	0.546	0.158	0.086	3.23	0.393	0.47	0.101	0.269	0.18	0.534
D4QBB3	Hemoglobin beta OS=Bos taurus OX=9913 GN=HBB PE=3 SV=1	4			0.489				0.848					1.059	0.782		0.713				0.776			5.433		0.839	0.536		0.549					0.939				3.254							0.671	2.061	0.367
Q9TS85	Histidine-rich GLYCOPROTEIN=FACTOR XIIIA substrate (Fragments) OS=Bos taurus OX=9913 PE=1 SV=1	4	1.497	1.584	1.365	0.673	1.337		1.251			1.268	1.826	0.975	1.191	1.088	1.588			0.835	0.903	1.324	1.112	1.051	1.09		1.232			1.091		1.091	1.606		1.189			0.717	1.198	1.092	0.778	0.814	1.343		1.507	0.766		0.789	1.008
Q09TE3	Insulin-like growth factor binding protein acid labile subunit OS=Bos taurus OX=9913 PE=2 SV=1	4	1.361	1.101	1.183	1.116	1.126	1.106	1.084	0.882	1.511	1.003	1.242	1.27	0.898	1.036	1.49	0.74	1.371	1.017	0.861	1.268	1.079	0.928	1.026	1.196	1.161	1.261	1.084	1.214	1.09	0.917	1.283	1.11	1.082	0.765	0.859	0.888	0.876	0.82	1.027	0.729	0.858	1.2	0.887	0.734	0.785	0.909	0.937
M5FKF4	Insulin-like growth factor binding protein, acid labile subunit OS=Bos taurus OX=9913 GN=IGFALS PE=4 SV=1	4	1.361	1.101	1.183	1.116	1.126	1.106	1.084	0.882	1.511	1.003	1.242	1.27	0.898	1.036	1.49	0.74	1.371	1.017	0.861	1.268	1.079	0.928	1.026	1.196	1.161	1.261	1.084	1.214	1.09	0.917	1.283	1.11	1.082	0.765	0.859	0.888	0.876	0.82	1.027	0.729	0.858	1.2	0.887	0.734	0.785	0.909	0.937
F1MC11	Keratin, type I cytoskeletal 14 OS=Bos taurus OX=9913 GN=KRT14 PE=1 SV=2	4	1.897	2.029	2.423	2.456	1.426	1.31	1.067	1.096	1.469	1.467	1.488	1.37	3.672	3.457	2.015	0.735	1.2	1.188	0.996	1.522	1.341	2.077	1.022	1.823	1.151	1.035	1.325	1.466	1.225	1.257	1.051	1.279	1.455	1.596	1.421	1.09	1.263	0.932	1.052	1.618	1.624	0.982	1.344	1	1.566	0.856	1.843
Q5XQN5	Keratin, type II cytoskeletal 5 OS=Bos taurus OX=9913 GN=KRT5 PE=1 SV=1	4		1.526		2.024	1.691		1.027				1.274	1.285	2.927	1.931				1.106		1.003										1.879							0.93	0.824	1.371	1.395				0.856		1.379	1.977
M0QVZ6	Keratin, type II cytoskeletal 5 OS=Bos taurus OX=9913 GN=KRT5 PE=3 SV=1	4		1.526		2.024	1.691		1.027				1.274	1.285	2.927	1.931				1.106		1.003										1.879							0.93	0.824	1.371	1.395				0.856		1.379	1.977
A5D7M6	KRT5 protein OS=Bos taurus OX=9913 GN=KRT5 PE=2 SV=1	4		1.526		2.024	1.691		1.027				1.274	1.285	2.927	1.931				1.106		1.003										1.879							0.93	0.824	1.371	1.395				0.856		1.379	1.977
G3MY87	Maltase-glucoamylase OS=Bos taurus OX=9913 GN=MGAM PE=3 SV=1	4	1.442	1.094	1.062		1.207	1.104		0.796	1.593	0.992	1.237			0.907	1.184	0.514	1.307		0.791	1.635	1.06	0.954	0.87	1.124	1.029	1.195	0.943	1.461	1.072	1.09	1.125	1.106	0.8	0.872	0.934	0.841	1.149	1.031		0.572	1.173	1.174	0.908		0.541		0.966
Q95121	Pigment epithelium-derived factor OS=Bos taurus OX=9913 GN=SERPINF1 PE=1 SV=1	4	1.317	1.14	1.053	1.305	0.976		1.14	1.147	1.265	0.961	1.271	1.341	0.989	1.131	1.444		1.413	1.053	1.006	1.219	1.11	1.225	1.625	1.143	1.139	1.223	1.055	1.057	0.991	1.131	1.443	1.082	1.088	0.892		0.823	0.973	0.955	1.333	0.868	1.026	1	0.978	0.899	0.738	1.219	1.222
Q3ZEJ6	Serpin A3-3 OS=Bos taurus OX=9913 GN=SERPINA3-3 PE=1 SV=2	4	0.904	1.576	0.842	0.822	1.302	1.638	1.362	1.719	0.727	1.483	0.807	0.762	0.515	2.293	1.487	1.533	0.801	0.916	1.127	0.738	1.977	1.456	0.913	1.006	1.079	1.93	1.874	0.703	1.292	0.945	0.698	0.902	1.014	0.306	0.454	1.429	0.471	0.825	1.11	0.871	1.976	0.358	0.693	1.322	0.688	0.643	0.954
A2I7N0	Serpin A3-4 OS=Bos taurus OX=9913 GN=SERPINA3-4 PE=3 SV=1	4	0.904	1.576	0.842	0.822	1.302	1.638	1.362	1.719	0.727	1.483	0.807	0.762	0.515	2.293	1.487	1.533	0.801	0.916	1.127	0.738	1.977	1.456	0.913	1.006	1.079	1.93	1.874	0.703	1.292	0.945	0.698	0.902	1.014	0.306	0.454	1.429	0.471	0.825	1.11	0.871	1.976	0.358	0.693	1.322	0.688	0.643	0.954
A2I7N1	Serpin A3-5 OS=Bos taurus OX=9913 GN=SERPINA3-5 PE=3 SV=1	4
A0A0A0MP92	Serpin A3-7 OS=Bos taurus OX=9913 GN=SERPINA3-7 PE=1 SV=1	4	1.355	1.005	1.316	1.075	1.196	1.239	1.35	1.493	1.115	1.072	1.159	1.198	0.887	1.265	1.756	0.999	1.188	0.995	1.212	1.059	1.187	1.214	1.027	1.017	1.399	1.306	0.884	0.879	1.264	2.238	1.165	1.078	1.327	0.651	0.951	1.262	1.199	1.118	1.116	1.484	1.742	0.821	0.809	1.084	0.815	0.917	1.036
A2I7N3	Serpin A3-7 OS=Bos taurus OX=9913 GN=SERPINA3-7 PE=3 SV=1	4	1.355	1.005	1.316	1.075	1.196	1.239	1.35	1.493	1.115	1.072	1.159	1.198	0.887	1.265	1.756	0.999	1.188	0.995	1.212	1.059	1.187	1.214	1.027	1.017	1.399	1.306	0.884	0.879	1.264	2.238	1.165	1.078	1.327	0.651	0.951	1.262	1.199	1.118	1.116	1.484	1.742	0.821	0.809	1.084	0.815	0.917	1.036
F1MJZ4	Uncharacterized protein OS=Bos taurus OX=9913 GN=IGFALS PE=4 SV=2	4	1.361	1.101	1.183	1.116	1.126	1.106	1.084	0.882	1.511	1.003	1.242	1.27	0.898	1.036	1.49	0.74	1.371	1.017	0.861	1.268	1.079	0.928	1.026	1.196	1.161	1.261	1.084	1.214	1.09	0.917	1.283	1.11	1.082	0.765	0.859	0.888	0.876	0.82	1.027	0.729	0.858	1.2	0.887	0.734	0.785	0.909	0.937
F1MUY2	Uncharacterized protein OS=Bos taurus OX=9913 GN=KRT6B PE=1 SV=1	4	1.584	2.748			1.232		0.611	0.703	1.661	1.086	1.399	1.627	3.1	1.734			1.166		0.896		1.227	1.137				0.955			2.144				1.219	2.634				0.844			1.691	0.971	1.131	1.244			1.723
F1MKE7	Uncharacterized protein OS=Bos taurus OX=9913 GN=KRT6C PE=3 SV=2	4	1.584	2.748			1.232		0.611	0.703	1.661	1.086	1.399	1.627	3.1	1.734			1.166		0.896		1.227	1.137				0.955			2.144				1.219	2.634				0.844			1.691	0.971	1.131	1.244			1.723
A0A0A0MPA0	Uncharacterized protein OS=Bos taurus OX=9913 GN=LOC784932 PE=1 SV=1	4	0.471	0.636	1.627	1.484	0.683	1.85	0.556	0.605	0.485	0.444	1.609	1.477	0.467	2.211	0.633	0.54	0.474	0.381	1.967	1.379	0.617	0.474	0.368	1.411	0.463	0.567	2.129	1.179	0.549	0.534	0.422	1.346	1.597	0.285	0.433	2.038	0.721	0.504	1.96	1.285	0.649	0.333	0.384	1.957	1.046	0.455	1.929
F1MLW8	Uncharacterized protein OS=Bos taurus OX=9913 PE=1 SV=2	4	1.066	1.096	1.219	0.916	1.542	1.136	0.863	1.794	0.996	1.187	1.29	1.26	0.767	1.206	0.781	1.239	0.967	0.921	1.722	1.053	1.42	0.805	1.002	0.891	1.069	1.772	0.833	0.866	1.381	1.011	0.935	1.378	1.261	0.388	0.756	1.179	0.652	0.916	0.869	1.123	0.809	0.454	0.67	1.115	0.638	0.944	0.83
P07224	Vitamin K-dependent protein S OS=Bos taurus OX=9913 GN=PROS1 PE=1 SV=1	4	1.174	1.048	1.183	0.998	1.339	1.115	1.135	1.349	1.158	1.112	1.118	1.392	1.008	1.239	1.488	0.824	1.067	1.087	1.094	1.152	1.577	1.23	1.163	1.008	1.225	1.771	1.128	1.313	1.032	0.932	1.135	1.004	1.037	0.915	1.023	0.888	0.814	0.762	0.981	0.76	2.055	1.096	0.838	0.963	0.768	0.879	1.011
Q27983	Alpha1-antichymotrypsin isoform pHHK11 (Fragment) OS=Bos taurus OX=9913 PE=2 SV=1	3	1.053	1.421	1.04	0.975	1.012	1.182	1.068	1.386	1.023	1.265	1.092	0.995	0.659	1.66	1.3	1.023	0.873	0.955	1.104	0.987	1.345	1.365	0.834	1.03	1.334	1.751	1.453	0.85	0.943	1.037	0.839	1.003	1.121	0.633	0.771	0.921	0.67	0.897	1.16	0.827	1.829	0.604	0.842	1.008	0.816	0.868	1.055
Q27984	Alpha1-antichymotrypsin isoform pHHK12 (Fragment) OS=Bos taurus OX=9913 PE=2 SV=1	3	1.355	1.005	1.316	1.075	1.196	1.239	1.35	1.493	1.115	1.072	1.159	1.198	0.887	1.265	1.756	0.999	1.188	0.995	1.212	1.059	1.187	1.214	1.027	1.017	1.399	1.306	0.884	0.879	1.264	2.238	1.165	1.078	1.327	0.651	0.951	1.262	1.199	1.118	1.116	1.484	1.742	0.821	0.809	1.084	0.815	0.917	1.036
P34955	Alpha-1-antiproteinase OS=Bos taurus OX=9913 GN=SERPINA1 PE=1 SV=1	3	1.322	1.067	1.156	1.112	0.923	1.034	1.098	0.94	1.232	1.019	1.293	1.412	0.878	0.976	1.367	0.683	1.168	0.867	0.927	1.36	1.049	0.998	1.111	1.141	1.133	0.997	0.928	1.243	0.887	1.11	1.151	1.029	1.068	0.72	0.866	0.861	0.855	0.826	1.068	0.872	1.101	0.818	0.941	0.809	0.76	0.929	0.991
P12763	Alpha-2-HS-glycoprotein OS=Bos taurus OX=9913 GN=AHSG PE=1 SV=2	3	1.665	0.959	1.31	1.285	0.967	0.824	1.123	0.852	1.506	0.798	1.472	1.448	1.073	0.903	1.344	0.65	1.447	0.852	0.899	1.384	0.741	0.733	1.199	1.021	1.255	0.593	0.793	1.59	0.831	1.115	1.19	1.004	1.025	0.777	1.052	0.801	0.814	0.868	1.277	0.721	0.931	0.849	0.983	0.776	0.728	0.959	1.007
K4JBS4	Alpha-2-macroglobulin variant 11 OS=Bos taurus OX=9913 GN=A2M PE=2 SV=1	3	1.533	1.198	1.253	1.223	1.065	0.871	1.286	0.739	1.323	1.217	1.219	1.493	1.128	1.002	1.778	0.645	1.229	1.06	0.904	1.38	1.269	1.013	1.217	0.956	1.034	1.258	0.925	1.158	1.034	1.142	1.287	1.002	1.218	1.231	0.779	0.977	1.008	0.977	1.295	0.863	1.213	1.246	0.838	1.002	0.941	1.05	1.002
P41361	Antithrombin-III OS=Bos taurus OX=9913 GN=SERPINC1 PE=1 SV=2	3	1.305	1.298	1.076	1.116	1.056	1.063	1.249	0.944	1.531	1.197	1.247	1.356	0.973	0.951	1.445	0.813	1.237	0.863	0.778	1.446	0.885	0.813	1.089	0.988	1.292	0.775	0.868	1.205	0.99	1.22	1.159	1.069	0.921	0.954	0.936	0.783	0.995	1.016	1.143	0.808	1.01	1.288	0.876	0.868	0.757	0.965	0.912
Q17QH1	APOF protein OS=Bos taurus OX=9913 GN=APOF PE=2 SV=2	3	1.804	1.166	1.074		1.171		1.182	0.979	1.732	2.056		1.434	0.877		1.163		1.014		0.814		1.243	1.161	1.069		1.437	0.915		1.369	0.891		1.252		1.215	0.895		0.738					1.159	1.035	0.944	0.802			1.085
Q0ZCB4	Apolipoprotein E (Fragment) OS=Bos taurus OX=9913 PE=3 SV=1	3	1.24	1.091	1.102		1.293			1.203		1.08	1.119			1.301	1.346		1.016				1.401			1.116	1.052	1.425	1.305					1.129	1.248			0.835		0.888			1.184	1.184			0.849		1.021
Q03247	Apolipoprotein E OS=Bos taurus OX=9913 GN=APOE PE=1 SV=1	3	1.24	1.091	1.102		1.293			1.203		1.08	1.119			1.301	1.346		1.016				1.401			1.116	1.052	1.425	1.305					1.129	1.248			0.835		0.888			1.184	1.184			0.849		1.021
A7YWR0	Apolipoprotein E OS=Bos taurus OX=9913 GN=APOE PE=2 SV=1	3	1.24	1.091	1.102		1.293			1.203		1.08	1.119			1.301	1.346		1.016				1.401			1.116	1.052	1.425	1.305					1.129	1.248			0.835		0.888			1.184	1.184			0.849		1.021
A0A140T881	Apolipoprotein E OS=Bos taurus OX=9913 GN=APOE PE=3 SV=1	3	1.24	1.091	1.102		1.293			1.203		1.08	1.119			1.301	1.346		1.016				1.401			1.116	1.052	1.425	1.305					1.129	1.248			0.835		0.888			1.184	1.184			0.849		1.021
A8YXZ2	C8G protein OS=Bos taurus OX=9913 GN=C8G PE=2 SV=1	3	1.268	1.087	1.136	1.145	0.956	0.919	1.251	1.03	1.195	1.074	1.257	1.352	0.947	1.116	1.405	0.607	1.312	0.984	0.908	1.261	1.063	1.008	1.192	1.146	1.259	1.046	0.942	1.05	1.037	1.129	1.133	1.145	1.033	0.71	1.156	0.888	0.91	1.039	1.006	0.808	1.146	1.024	0.952	0.837	0.756	0.997	0.94
P17697	Clusterin OS=Bos taurus OX=9913 GN=CLU PE=1 SV=1	3	1.416	1.219	1.107	1.221	1.659	1.038		1.004	1.352	1.034	1.196			0.858	1.445	0.752	1.293	1.147	0.919		1.004	0.933	1.163	1.599	1.194	1.012	1.178	1.258	1.122		1.294	1.46	1.065	0.92	0.996	0.717		1.035	1.038		1.036	1.167	0.941		1.07	1.07	0.988
P00741	Coagulation factor IX OS=Bos taurus OX=9913 GN=F9 PE=1 SV=2	3	1.088		1.296			1.232	1.248	1.215	1.115	0.993	1.443	1.406	0.803	1.355	1.459	1.189	1.133		0.937	1.135	1.769	0.995	1.214		1.313	1.4		0.906	1.537	1.158	1.365		1.175	0.691	0.935	0.893	0.908	0.914		0.928	1.526	0.874	0.954	0.778
F1MX86	Complement C8 beta chain OS=Bos taurus OX=9913 GN=C8B PE=4 SV=2	3	1.217	1.232	1.103	1.15	1.446	1.08	1.219	1.127	1.295	1.242	1.243	1.336	1.048	1.244	1.364	1.034	1.079	1.432	0.983	1.239	1.471	1.14	1.201	1.154	1.346	1.684	0.972	1.016	1.295	1.063	1.267	1.175	1.139	0.667	0.876	0.913	0.934	1.017	1.089	0.824	0.998	0.711	0.82	0.999	0.813	0.944	0.894
Q2KIK9	Complement component 8, beta polypeptide OS=Bos taurus OX=9913 GN=C8B PE=2 SV=1	3	1.217	1.232	1.103	1.15	1.446	1.08	1.219	1.127	1.295	1.242	1.243	1.336	1.048	1.244	1.364	1.034	1.079	1.432	0.983	1.239	1.471	1.14	1.201	1.154	1.346	1.684	0.972	1.016	1.295	1.063	1.267	1.175	1.139	0.667	0.876	0.913	0.934	1.017	1.089	0.824	0.998	0.711	0.82	0.999	0.813	0.944	0.894
Q58D62	Fetuin-B OS=Bos taurus OX=9913 GN=FETUB PE=1 SV=1	3		0.886	1.423	1.301	1.089	1.01	1.456	1.802	1.433		1.499	1.711	1.186	0.826	1.551	1.22	1.782	1.426	1.533			0.816	1.226	1.607	1.214	1.415	1.258	1.063	1.091		1.155	0.926		0.823	0.88	0.934		0.812	1.441			1.099	1.043	1.177	1.01	1.626	1.072
P37141	Glutathione peroxidase 3 OS=Bos taurus OX=9913 GN=GPX3 PE=2 SV=2	3	1.025	0.997	0.869	1.155	1.003	1.038	0.941	1.287	0.959	1.05	0.971	1.213	0.727	2.237	1.133	0.998	0.984	0.877		1.186	1.908		0.964	0.994	0.821	1.798	1.345	0.974	0.992	0.834	0.992	0.848	0.919	0.669	0.744	0.901	0.715	0.752	0.826	0.706	2.013	0.745		0.848	0.708	0.759	0.778
G3X8D7	Glutathione peroxidase OS=Bos taurus OX=9913 GN=GPX3 PE=3 SV=1	3	1.025	0.997	0.869	1.155	1.003	1.038	0.941	1.287	0.959	1.05	0.971	1.213	0.727	2.237	1.133	0.998	0.984	0.877		1.186	1.908		0.964	0.994	0.821	1.798	1.345	0.974	0.992	0.834	0.992	0.848	0.919	0.669	0.744	0.901	0.715	0.752	0.826	0.706	2.013	0.745		0.848	0.708	0.759	0.778
P02081	Hemoglobin fetal subunit beta OS=Bos taurus OX=9913 PE=1 SV=1	3	4.608	0.853	2.079	0.361	1.133	0.542	0.896	0.583	2.564	0.932	1.249	2.01	0.827	0.893	0.65	0.392	0.85	0.189	0.816	1.731	1.012	1.226	0.914	0.342	0.344	1.292	0.472	5.309	0.645	0.4	0.71	0.438	0.801	4.919	1.047	0.413	3.419	0.405	0.606	0.641	0.827	0.42	1.013	0.376	1.134	0.336	0.928
Q2KII3	Hepatitis A virus cellular receptor 1 N-terminal domain containing protein OS=Bos taurus OX=9913 GN=MGC137099 PE=2 SV=1	3		0.914	1.214	1.205	1.308	0.867	1.152	0.807	1.494		1.411	1.46	1.199	1.036	1.542	0.589	1.096	0.918	1.206	1.287		1.304	1.171	1.073	1.333	0.935	1.359	1.176	1.248	1.2	1.4	1.016		0.902	1.133	0.738	1.143	1.198	1.323	0.869		1.104	0.925	0.749	0.963	1.348	1.124
P33433	Histidine-rich glycoprotein (Fragments) OS=Bos taurus OX=9913 GN=HRG PE=1 SV=1	3
Q3SYR8	Immunoglobulin J chain OS=Bos taurus OX=9913 GN=JCHAIN PE=1 SV=1	3	1.571	0.989	1.21	1.466	0.979	1.214	1.339	0.768	1.328	0.779	1.231	1.75	1.182	1.012	1.67	0.544	1.441	0.778	0.992	1.488	0.914	1.207	1.06	1.368	0.913	0.77	1.043	1.317	0.823	1.252	0.998	1.134	1.267	0.759	0.659	0.807	0.924	0.858	1.069	1.179	1.32	0.901	0.839	0.867	0.929	0.92	1.225
G3N0V2	Keratin 1 OS=Bos taurus OX=9913 GN=KRT1 PE=1 SV=1	3	1.689	1.577	1.043	1.703	1.538		0.789		1.242	1.3	1.13	1.303	2.942	1.329	1.745			1.199		1.22	1.231		1.049	1.324	1.245		1.249	1.031	1.301	1.102	0.795	0.918	1.252	1.61		0.817	0.93	0.839	0.96	1.32	1.52			1.296	1.009	0.599	1.294
G3MZ71	Keratin 2 OS=Bos taurus OX=9913 GN=KRT2 PE=1 SV=1	3
E1B991	Keratin 2 OS=Bos taurus OX=9913 GN=KRT2 PE=1 SV=2	3
G3MXL3	Keratin 3 OS=Bos taurus OX=9913 GN=KRT3 PE=1 SV=1	3
Q0P5J7	Keratin, type I cuticular Ha5 OS=Bos taurus OX=9913 GN=KRT35 PE=2 SV=2	3
A0A140T8B6	Keratin, type I cuticular Ha5 OS=Bos taurus OX=9913 GN=KRT35 PE=3 SV=1	3
E1BPW6	Keratin, type I cuticular Ha5 OS=Bos taurus OX=9913 GN=KRT35 PE=3 SV=2	3
A1L595	Keratin, type I cytoskeletal 17 OS=Bos taurus OX=9913 GN=KRT17 PE=2 SV=1	3	2.37	1.548	2.423	2.456	1.729	1.31	1.11	1.284	1.469	1.936	1.488	1.583	2.452	3.457	2.015	0.735	1.3	1.188	0.996	1.522	1.432	2.077	1.022	1.823	1.151	1.158	1.325	1.466	1.225	1.257	1.051	1.279	1.714	1.596	1.421	1.09	1.263	0.932	1.052	1.618	1.446	1.1	1.344	1.088	1.566	0.856	2.316
A0A140T867	Keratin, type I cytoskeletal 17 OS=Bos taurus OX=9913 GN=KRT17 PE=3 SV=1	3	2.37	1.548	2.423	2.456	1.729	1.31	1.11	1.284	1.469	1.936	1.488	1.583	2.452	3.457	2.015	0.735	1.3	1.188	0.996	1.522	1.432	2.077	1.022	1.823	1.151	1.158	1.325	1.466	1.225	1.257	1.051	1.279	1.714	1.596	1.421	1.09	1.263	0.932	1.052	1.618	1.446	1.1	1.344	1.088	1.566	0.856	2.316
Q29S21	Keratin, type II cytoskeletal 7 OS=Bos taurus OX=9913 GN=KRT7 PE=2 SV=1	3	2.072	2.095	1.269	2.532	2.426	1.218	1.052	0.957	1.302	1.175		1.648	3.955		2.084	0.705	0.759	0.964	0.872	1.585	1.365	1.04	0.768	1.68	0.968	1.286	1.221	1.529	1.315	1.503	0.86	0.954	1.317	2.349	1.386	0.946	1.296		1.08	1.776	1.585	0.806	1.075	1.406	1.07	0.701	1.755
Q08D91	Keratin, type II cytoskeletal 75 OS=Bos taurus OX=9913 GN=KRT75 PE=2 SV=1	3		1.529			1.378		0.886					1.221	3.47																															0.796			1.609
A4IFP2	KRT4 protein OS=Bos taurus OX=9913 GN=KRT4 PE=2 SV=1	3
E1BH94	Peptidoglycan recognition protein 2 OS=Bos taurus OX=9913 GN=PGLYRP2 PE=4 SV=2	3	1.194	2.031	0.857	1.147	1.147		1.164	1.307	1.296	1.59	1.137	1.38	0.825	1.863	1.33		1.004	1.728	0.833	1.042	1.297	1.214	1.095	1.256	1.172	1.399	1.014	1.11	1.553	0.927	1.027	1.294	0.882	0.852		0.729	0.874	0.917	1.118	0.801	0.956	1.083	0.805	1.128	0.732	0.9	1.154
P80109	Phosphatidylinositol-glycan-specific phospholipase D OS=Bos taurus OX=9913 GN=GPLD1 PE=1 SV=1	3		1.289		1.158	1.407	0.878	1.033	1.057				1.252	0.914			0.762	0.955	1.01	0.851			0.894	1.221			1.294		1.222			1.202				0.492				1.05			0.878	0.793	0.874		1.087	1.161
P00978	Protein AMBP OS=Bos taurus OX=9913 GN=AMBP PE=1 SV=2	3	1.492	0.9	1.218	1.287	0.919	1.282	1.129	0.868	1.297	1	1.359	1.574	0.923	1.112	1.54	0.633	1.354	0.936	0.983	1.4	0.955	1.071	1.01	1.235	0.974	0.814	0.952	1.269	1.005	1.105	1.021	1.188	1.059	0.956	0.804	0.797	0.933	0.85	1.193	0.848	1.001	1.009	0.877	0.999	0.787	0.972	1.128
F1MMK9	Protein AMBP OS=Bos taurus OX=9913 GN=AMBP PE=4 SV=2	3	1.492	0.9	1.218	1.287	0.919	1.282	1.129	0.868	1.297	1	1.359	1.574	0.923	1.112	1.54	0.633	1.354	0.936	0.983	1.4	0.955	1.071	1.01	1.235	0.974	0.814	0.952	1.269	1.005	1.105	1.021	1.188	1.059	0.956	0.804	0.797	0.933	0.85	1.193	0.848	1.001	1.009	0.877	0.999	0.787	0.972	1.128
Q2KIT0	Protein HP-20 homolog OS=Bos taurus OX=9913 PE=2 SV=1	3	2.848	1.186	1.248	1.714	0.983	0.947	1.132	0.753	2.007	1.189	1.365	2.066	0.942	1.127	2.286	0.845	1.284	0.797	0.728	1.768	0.698	1.677	1.569	1.515	1.285	0.639	0.795	1.54	0.957	1.123	1.144	1.398	1.104	2.463	1.04	0.637	1.208	0.981	1.171	1.721	0.692	1.192	0.925	0.653	0.835	1.066	1.551
G3N1U4	Serpin A3-3 OS=Bos taurus OX=9913 GN=SERPINA3-3 PE=3 SV=1	3	0.904	1.576	0.842	0.822	1.302	1.638	1.362	1.839	0.727	1.483	0.807	0.762	0.515	2.293	1.487	1.533	0.746	0.916	1.127	0.738	1.977	1.456	0.913	1.006	1.079	2.053	1.874	0.703	1.292	0.945	0.698	0.902	1.014	0.306	0.454	1.429	0.471	0.825	1.11	0.871	1.976	0.261	0.693	1.322	0.688	0.643	0.954
A2I7N2	Serpin A3-6 OS=Bos taurus OX=9913 GN=SERPINA3-6 PE=3 SV=1	3	0.739	1.654	0.842	0.822	1.352	1.593	1.362	1.738	0.727	1.649	0.807	0.762	0.515	2.293	1.487	1.506	0.787	0.916	1.127	0.738	2.233	1.456	0.913	1.006	1.079	1.921	1.874	0.703	1.292	0.945	0.698	0.902	0.957	0.306	0.448	1.429	0.471	0.825	1.11	0.871	2.443	0.328	0.693	1.322	0.688	0.643	0.958
Q6T181	Sex hormone-binding globulin (Fragment) OS=Bos taurus OX=9913 GN=SHBG PE=4 SV=1	3	1	0.715	1.29	1.033	0.676	0.854	1.184	0.572	1.243	1.161	1.33	1.558	1.01	0.716	1.31	0.884	1.328	0.723	0.684	1.07	2.233	1.449	1.179	1.119	1.465	0.516	1.015	1.033	0.872	0.889	0.991	1.063	1.197	0.833	1.28	1.081	0.93	0.862	0.991	0.827	1.331	0.795	0.871	0.786	0.746	1.191	1.11
Q2KIS7	Tetranectin OS=Bos taurus OX=9913 GN=CLEC3B PE=2 SV=1	3	1.253	1.039	1.14	1.174	0.884	1.141	1.498	0.902	1.274	1.184	1.23	1.384	0.85	1.094	1.98	0.823	1.228	0.958	0.968	1.295	1.152	1.457			1.386	0.652			0.91	0.934			1.218	0.903	0.965	0.882	0.847	0.955	1.036	0.761	0.984	1.169	0.916	0.835		1.007	0.979
G3N2D7	Uncharacterized protein OS=Bos taurus OX=9913 GN=LOC100297192 PE=4 SV=1	3	1.54	0.973	1.374	1.096	0.999	1.383	1.415	0.898	1.584	0.928	1.441	1.424	0.815	1.273	1.665	1.077	1.236	0.987	1.144	1.289	0.998	1.15	1.071	0.999	1.379	1.15	1.322	0.953	0.949	1.026	1.152	1.063	1.058	0.803	1.114	1.065	0.933	1.084	0.99	0.73	1.191	0.98	1.072	1.051	0.788	1.093	0.994
G3N0S9	Uncharacterized protein OS=Bos taurus OX=9913 GN=LOC515150 PE=4 SV=1	3	1.212	1.089	0.775	1.06	1.207	1.054	1.278	0.871	1.126	1.416	0.946	1.532	1.186	1.67	1.466	0.77	1.144	1.031	0.952	1.281	1.223	1.096	1.198	1.007	1.085	1.566	1.79	1.116	1.266	0.704	1.178	0.994	1.085	0.864	0.777	0.589	0.759	0.699	0.977	0.847	1.068	1.035	0.881	0.632	0.919	0.816	0.865
G8JKW7	Uncharacterized protein OS=Bos taurus OX=9913 GN=SERPINA3 PE=3 SV=1	3
F1N566	Uncharacterized protein OS=Bos taurus OX=9913 PE=3 SV=1	3								0.812									1.163						2.964	1.079		2.481	4.585	1.007			0.973	1.134										0.989			1.03
F1MP09	Uncharacterized protein OS=Bos taurus OX=9913 PE=4 SV=2	3	1.188	1.155	1.252	1.1	1.208	1.208	0.946	1.044	1.257	1.198	1.095	1.266	0.961	1.6	1.151	0.898	0.915	0.866	0.949	1.157	1.074	1.221	1.074	1.128	1.02	0.986	0.943	0.943	1.085	1.033	1.13	1.193	0.995	0.9	1.022	0.759	0.869	0.758	1.117	0.753	1.125	1.009	0.961	0.792	0.649	0.915	0.926
Q3Y5Z3	Adiponectin OS=Bos taurus OX=9913 GN=ADIPOQ PE=1 SV=1	2	1.686	0.615	1.216	1.066	1.202	0.889	1.209	0.963	1.523	0.68	1.322	1.336	1.03	1.034	1.415	0.656	2.05	0.569			0.952		1.347	1.135	0.967	0.526	1.392	1.025	0.976		1.537	1.178	1.271	0.985	1.321	0.782		0.82	1.026		1.468	0.912		0.785	0.833	0.783	1.026
Q5GN72	Alpha-1-acid glycoprotein OS=Bos taurus OX=9913 GN=agp PE=2 SV=2	2	1.355	1.476	0.905	0.769	1.428	0.984	0.972	1.332	1.347	1.145	1.021	1.014	0.721	2.957	1.127	1.018	1.135	0.796	0.874	0.888	3.386	1.448	0.893	1.268	2.047	2.955	1.19	0.832	1.329	1.002	1.011	1.219	1.001	0.633	0.893	1.186	0.513	0.875	0.895	0.899	2.058	0.801	0.874	1.187	0.718	0.795	0.935
Q3SZR3	Alpha-1-acid glycoprotein OS=Bos taurus OX=9913 GN=ORM1 PE=2 SV=1	2	1.355	1.476	0.905	0.769	1.428	0.984	0.972	1.332	1.347	1.145	1.021	1.014	0.721	2.957	1.127	1.018	1.135	0.796	0.874	0.888	3.386	1.448	0.893	1.268	2.047	2.955	1.19	0.832	1.329	1.002	1.011	1.219	1.001	0.633	0.893	1.186	0.513	0.875	0.895	0.899	2.058	0.801	0.874	1.187	0.718	0.795	0.935
K4JR71	Alpha-2-macroglobulin variant 2 OS=Bos taurus OX=9913 GN=A2M PE=2 SV=1	2	1.533	1.198	1.241	1.223	1.065	0.871	1.286	0.801	1.364	1.217	1.219	1.493	1.128	1.002	1.827	0.645	1.195	1.06	0.904	1.38	1.269	1.013	1.217	0.956	0.965	1.407	0.925	1.158	0.965	1.142	1.287	1.002	1.218	1.254	0.779	0.923	1.008	0.977	1.295	0.863	1.213	1.172	0.838	1.002	0.941	1.05	1.002
F1MP21	Alpha-amylase OS=Bos taurus OX=9913 GN=LOC539383 PE=3 SV=2	2	1.285	1.071	1.237	1.246	1.109				1.556	0.969	1.363			1.234	1.572			1.092		1.296	1.09				1.127				0.811	1.105			1.13	2.166		1.15	1.002	0.895	1.003	0.858	1.255					0.947	0.965
P19035	Apolipoprotein C-III OS=Bos taurus OX=9913 GN=APOC3 PE=1 SV=2	2	1.687	1.013	1.202	1.431	0.893	0.951	1.062	0.531	1.597	0.935	1.356	1.403	1.067	0.873	1.319	0.528	0.803	0.768	0.333	1.237	0.897	0.684	1.187	1.313	1.231	0.489	0.681	1.129	1.169	1.059	1.128	1.231	1.036	1.217	1.294	0.764	1.219	1.243	1.262	0.882	0.883	1.904	1.357	0.871	0.81	1.499	1.174
F1MYX2	Apolipoprotein M OS=Bos taurus OX=9913 GN=APOM PE=4 SV=1	2	1.293	1.161	1.504	1.065	1.039	1.01		1.058	1.333	1.108	1.721			1.434	1.288	1.777	0.901	0.827	0.834		1.149	1.499	0.776	1.255	1.515	0.838	1.203	0.824	1.253		1.302	1.207	1.058	0.888	0.738	0.932		1	1.164		1.157	1.208	0.947		0.891	1.023	1.207
Q3ZBQ9	APOM protein OS=Bos taurus OX=9913 GN=APOM PE=2 SV=1	2	1.293	1.161	1.504	1.065	1.039	1.01		1.058	1.333	1.108	1.721			1.434	1.288	1.777	0.901	0.827	0.834		1.149	1.499	0.776	1.255	1.515	0.838	1.203	0.824	1.253		1.302	1.207	1.058	0.888	0.738	0.932		1	1.164		1.157	1.208	0.947		0.891	1.023	1.207
Q2KIG3	Carboxypeptidase B2 OS=Bos taurus OX=9913 GN=CPB2 PE=1 SV=1	2	1.308	1.043	1.182	1.176	1.055	1.117	1.139	1.061	1.157	1.01	1.273	1.456	0.876	1.173	1.463	0.8	1.081	0.982	0.923	1.278	1.149	1.035		1.069	1.137	1.133	0.971		0.976	0.855		1.042	0.911	0.862	0.902	0.846	1.033	0.903	1.026	0.754	1.053	0.848	0.921	0.92	0.689	0.96	0.887
F1N514	CD5 antigen-like precursor OS=Bos taurus OX=9913 GN=CD5L PE=1 SV=2	2	1.29	0.975	1.182	1.135	1.165	1.293	1.093	0.859	1.277	0.757	1.235	1.447	0.897	1.026	1.485	0.674	1.459	0.925	1.132	1.277	1.163	1.214	0.992	1.158	0.934	0.801	1.006	0.997	0.963	0.9	1.038	1.107	1.301	0.78	0.69	0.902	0.693	0.97	0.98	0.912	1.315	0.951	0.696	0.943	0.929	0.935	0.952
A6QNW7	CD5L protein OS=Bos taurus OX=9913 GN=CD5L PE=2 SV=1	2	1.29	0.975	1.182	1.135	1.165	1.293	1.093	0.859	1.277	0.757	1.235	1.447	0.897	1.026	1.485	0.674	1.459	0.925	1.132	1.277	1.163	1.214	0.992	1.158	0.934	0.801	1.006	0.997	0.963	0.9	1.038	1.107	1.301	0.78	0.69	0.902	0.693	0.97	0.98	0.912	1.315	0.951	0.696	0.943	0.929	0.935	0.952
P00743	Coagulation factor X OS=Bos taurus OX=9913 GN=F10 PE=1 SV=1	2			0.645			1.334		1.038							1.598	0.844	0.784		0.543	1.508		1.523			0.875	1.9				0.453					0.455	0.892	0.702			0.999		0.652	0.512
Q3SYT3	Complement C1r subcomponent precursor OS=Bos taurus OX=9913 GN=C1R PE=2 SV=1	2			1.263				1.023	1.188	1.137		1.145	1.248	1.01	1.777	1.377		1.472		1.072			1.103		1.11	1.122	1.163	1.317		1.148			1.026		0.716		0.831		0.818				0.793	0.882	0.785	0.867
Q1JPD0	Complement component 8, alpha polypeptide (Fragment) OS=Bos taurus OX=9913 GN=C8A PE=2 SV=1	2	1.389	1.152		0.953	1.233	1.003	1.2	0.945	1.328	1.061	1.213	1.342	0.931	1.422		0.901	1.114	0.928	0.935	1.196	1.309	0.956		1.022		1.081	1.152		1.185	1.086		1.073	1.092	0.694	0.866		0.782	0.904	0.959	0.8	1.152	0.768	0.833	0.92	0.788	0.947	0.959
Q3KUS7	Complement factor B (Fragment) OS=Bos taurus OX=9913 GN=BF PE=4 SV=1	2	1.364	1.026	1.297	0.926	1.13	1.063	1.089	1.142	1.277	0.937	1.265	1.173	1.052	1.022	1.444	0.827	1.219	0.913	0.931	1.216	0.905	1.063	1.181	1.05	1.264	1.069	0.998	1.029	0.911	1.081	1.101	1.161	1.038	0.729	0.977	0.803	0.865	0.73	1.3	0.736	1.009	0.777	0.89	0.759	0.719	0.876	0.967
Q3T0A3	Complement factor D OS=Bos taurus OX=9913 GN=CFD PE=2 SV=1	2	1.206							0.886		1.006							0.925		1.024		1.662	2.156				1.165							1.374								0.82	1.008	1
Q3MHW2	F10 protein (Fragment) OS=Bos taurus OX=9913 GN=F10 PE=2 SV=1	2			0.645			1.334		1.038							1.598	0.844	0.784		0.543	1.508		1.523			0.875	1.9				0.453					0.455	0.892	0.702			0.999		0.652	0.512
Q9MZ31	Fibronectin variable region (Fragment) OS=Bos taurus OX=9913 PE=2 SV=1	2	1.494	1.039	1.179	1.317	0.896	1.045		1.188	1.577	0.901	1.466			0.917	1.44	0.74	1.266	0.684		1.147	1.155		1.078	1.068	1.055	1.069	1.035	1.17	0.883	1.009	1.08	1.038	1.341	1.107	0.961	1.075	0.907	0.963	1.13	0.798	1.191	1.163			0.7	0.877	1.155
Q9MYV8	Haptoglobin (Fragment) OS=Bos taurus OX=9913 GN=hp PE=2 SV=1	2	0.869	0.526	0.176		1.641			1.924	0.672	0.611	0.753			3.807	0.212		0.498		0.931		4.022	0.575	0.554	0.439	0.175	2.234	2.522	0.543	0.818		0.513	0.485	0.714	0.407		0.171		0.518			3.471	0.34	0.459		0.367		0.526
P56652	Inter-alpha-trypsin inhibitor heavy chain H3 OS=Bos taurus OX=9913 GN=ITIH3 PE=1 SV=2	2	1.144	1.184	1.337	1.154	1.16	1.284	0.925	1.081	1.187	1.062	1.409	1.475	0.747	1.747	1.192	0.867	1.058	1.119	1.106	1.22	1.22	0.985	1.122		1.166	1.719		1.102	1.022	1	1.096		0.922	0.672	0.925	0.829	0.761	0.792	1.151	0.779	1.187	0.767	0.994	0.782		0.915	1.03
F1MJ66	Keratin 12 OS=Bos taurus OX=9913 GN=KRT12 PE=3 SV=2	2	2.37	1.548	2.423	2.456	1.729	1.31	1.039	1.284	1.469	1.936	1.488	1.703	1.982	3.457	2.015	0.735	1.3	1.188	0.996	1.522	1.432	2.077	1.022	1.823	1.151	1.158	1.325	1.466	1.225	1.257	1.051	1.279	1.714	1.596	1.421	1.09	1.263	0.932	1.052	1.618	1.446	1.1	1.344	1.171	1.566	0.856	2.316
F1MI98	Keratin 36 OS=Bos taurus OX=9913 GN=KRT36 PE=3 SV=2	2
P08728	Keratin, type I cytoskeletal 19 OS=Bos taurus OX=9913 GN=KRT19 PE=2 SV=1	2	2.37	1.548	2.423	2.456	1.729	1.31	1.039	1.284	1.469	1.936	1.488	1.703	1.982	3.457	2.015	0.735	1.3	1.188	0.996	1.522	1.432	2.077	1.022	1.823	1.151	1.158	1.325	1.466	1.225	1.257	1.051	1.279	1.714	1.596	1.421	1.09	1.263	0.932	1.052	1.618	1.446	1.1	1.344	1.171	1.566	0.856	2.316
Q148H6	Keratin, type I cytoskeletal 28 OS=Bos taurus OX=9913 GN=KRT28 PE=2 SV=1	2	1.346	2.274			1.272		1.029	0.855		0.918		1.187	4.715				1.072				1.234					0.876							1.151								1.832	0.832		0.924			1.601
A7YWM2	Keratin, type I cytoskeletal 40 OS=Bos taurus OX=9913 GN=KRT40 PE=2 SV=1	2
A7YWK3	Keratin, type II cytoskeletal 73 OS=Bos taurus OX=9913 GN=KRT73 PE=2 SV=1	2
Q17QL7	KRT15 protein OS=Bos taurus OX=9913 GN=KRT15 PE=1 SV=2	2		2.197	1.205	1.865	1.46		0.943	1.045	1.493			1.288	1.299		2.657		1.095	0.879							1.109	1.465			1.824					2.397		0.896			1.137			0.881		1.363		0.577	1.788
A6QP90	KRT32 protein OS=Bos taurus OX=9913 GN=KRT32 PE=2 SV=1	2
A3KMY1	KRT82 protein OS=Bos taurus OX=9913 GN=KRT82 PE=2 SV=1	2								0.898									0.931						2.964	0.983		4.058	3.752	1.007			0.973	1.07										0.869			0.942
Q1HDH9	LOC507184 (Fragment) OS=Bos taurus OX=9913 PE=3 SV=1	2								0.898									0.931						2.964	0.983		4.058	3.752	1.007			0.973	1.07										0.869			0.942
O02659	Mannose-binding protein C OS=Bos taurus OX=9913 GN=MBL PE=2 SV=1	2						1.233										0.927																			0.7
A6QNL0	Monocyte differentiation antigen CD14 OS=Bos taurus OX=9913 GN=CD14 PE=2 SV=1	2			1.49				1.175		1.46			1.361	1.216		1.311								1.387	1.155	1.341		1.096	1.241	1.203		1.771	1.164		1.02		1.049								0.913	1.374
Q95122	Monocyte differentiation antigen CD14 OS=Bos taurus OX=9913 GN=CD14 PE=2 SV=2	2			1.49				1.175		1.46			1.361	1.216		1.311								1.387	1.155	1.341		1.096	1.241	1.203		1.771	1.164		1.02		1.049								0.913	1.374
A8DBT6	Monocyte differentiation antigen CD14 OS=Bos taurus OX=9913 GN=CD14 PE=4 SV=1	2			1.49				1.175		1.46			1.361	1.216		1.311								1.387	1.155	1.341		1.096	1.241	1.203		1.771	1.164		1.02		1.049								0.913	1.374
F1MNM2	Phosphatidylinositol-glycan-specific phospholipase D OS=Bos taurus OX=9913 GN=GPLD1 PE=4 SV=1	2		1.289		1.158	1.407		1.142	1.057				1.376	1.029				0.955	1.01	0.851			0.894	1.221			1.294		1.222			1.202								1.05			0.878	0.793	0.971		1.087	1.161
Q2KIU3	Protein HP-25 homolog 2 OS=Bos taurus OX=9913 PE=2 SV=1	2	1.568	1.359	1.075	1.125	1.404	0.916	1.506		1.519	1.288		2.896	1.935		2.294	0.845		1.295	0.667	1.276	1.136	1.472	2.488	1.177	0.973		1.077	1.512	1.136	1.076	1.535	1.188	1.182	1.071	0.916	0.725	1.026		0.956	0.906	1.007		0.733	1.675	0.882	0.933	0.868
P18902	Retinol-binding protein 4 OS=Bos taurus OX=9913 GN=RBP4 PE=1 SV=1	2	1.541	1.141	0.965	0.975	1.529	1.205		0.761	1.489	1.109	1.136			1.064	1.815	0.783	1.545	1.301	1.026	1.185	1.32	1.207	1.168	1.444	1.385	0.937	0.672	1.24	1.134	1.189	1.281	1.51	0.919	1.25	1.145	1.107	0.806	1.074	1.007	0.865	0.597	1.394	0.844		0.687	1.39	0.778
G1K122	Retinol-binding protein OS=Bos taurus OX=9913 GN=RBP4 PE=3 SV=1	2	1.541	1.141	0.965	0.975	1.529	1.205		0.761	1.489	1.109	1.136			1.064	1.815	0.783	1.545	1.301	1.026	1.185	1.32	1.207	1.168	1.444	1.385	0.937	0.672	1.24	1.134	1.189	1.281	1.51	0.919	1.25	1.145	1.107	0.806	1.074	1.007	0.865	0.597	1.394	0.844		0.687	1.39	0.778
A6QPQ2	Serpin A3-8 OS=Bos taurus OX=9913 GN=SERPINA3-8 PE=2 SV=1	2	1.313	1.268	1.064	0.838	1.258	1.345	1.142	1.195	0.97	1.063	1.09	1.107	0.711	1.523	1.317	0.969	0.827	0.823	1.091	0.822	1.274	1.235		1.092	1.136	1.448	1.488		1.131	0.933		0.984	1.274	0.683	0.698	1.077	0.619	0.94	0.962	0.789	1.162	0.597	0.78	1.088	0.713	0.801	1.059
A0A0A0MP89	Serpin A3-8 OS=Bos taurus OX=9913 GN=SERPINA3-8 PE=3 SV=1	2	1.313	1.268	1.064	0.838	1.258	1.345	1.142	1.195	0.97	1.063	1.09	1.107	0.711	1.523	1.317	0.969	0.827	0.823	1.091	0.822	1.274	1.235		1.092	1.136	1.448	1.488		1.131	0.933		0.984	1.274	0.683	0.698	1.077	0.619	0.94	0.962	0.789	1.162	0.597	0.78	1.088	0.713	0.801	1.059
Q3SYR0	Serpin peptidase inhibitor, clade A (Alpha-1 antiproteinase, antitrypsin), member 7 OS=Bos taurus OX=9913 GN=SERPINA7 PE=2 SV=1	2	1.308	0.865	1.197		0.997	1.015	1.053	0.895	1.339	0.94	1.145	1.302	0.922	1.101	1.397	0.917	1.364		0.859	1.408	0.85	0.946	1.222	1.18	1.157	0.617	0.981	1.097	0.866	0.967	1.139	1.247	1.265	0.867	1.003	0.731	0.948	0.764		0.834	1.145	0.912	0.918	0.65	0.947		0.899
Q32L76	Serum amyloid A-4 protein OS=Bos taurus OX=9913 GN=SAA4 PE=2 SV=1	2	1.045		0.904			0.991	0.992	1.403	0.93	1.267	0.923	1.264	0.654	1.594	1.094	0.931	0.89			1.048	0.984			1.193	0.741	0.984	1.14		1.038	0.928		1.204	1.383	0.676	0.888	0.803	0.653	0.985		1.005	1.287	0.728		0.876	0.941
Q9TT36	Thyroxine-binding globulin OS=Bos taurus OX=9913 GN=SERPINA7 PE=2 SV=1	2	1.308	0.865	1.197		0.997	1.015	1.053	0.895	1.339	0.94	1.145	1.302	0.922	1.101	1.397	0.917	1.364		0.859	1.408	0.85	0.946	1.222	1.18	1.157	0.617	0.981	1.097	0.866	0.967	1.139	1.247	1.265	0.867	1.003	0.731	0.948	0.764		0.834	1.145	0.912	0.918	0.65	0.947		0.899
F1MZ96	Uncharacterized protein OS=Bos taurus OX=9913 PE=1 SV=2	2	0.823	1.064	1.443	1.104	1.214		0.783	1.142		0.543	1.23	1.32	0.804	1.612	0.764		0.945	0.645	1.491	1.187	1.636	0.727		1.068	0.963	0.679	1.209			1.226		1.09	1.088			1.257	0.712	1.403	1.054	0.908	1.186	0.469	0.868	1.456	0.946	0.961	0.938
A5D7Q2	Uncharacterized protein OS=Bos taurus OX=9913 PE=2 SV=1	2		0.816		1.078	1.391	0.962	1.264		1.414		1.129	1.392	0.934	0.945		0.8		0.834		1.127			1.123	0.923			1.189	1.201	0.828	1.123	1.152	1.124		0.677	0.698		0.836	0.857	1.539	0.881				1.022	0.697	0.994	1.44
G3MZ21	Uncharacterized protein OS=Bos taurus OX=9913 PE=3 SV=1	2	4.195	0.77	1.819	0.289	1.021	0.482	0.799	0.535	2.516	0.844	1.089	1.778	0.724	0.881	0.554	0.352	0.785	0.142	0.685	1.482	0.886	0.878	0.801	0.266	0.299	1.199	0.348	5.156	0.598	0.343	0.64	0.358	0.744	4.916	0.967	0.378	2.872	0.374	0.506	0.537	0.768	0.382	0.775	0.347	0.928	0.266	0.829
G3N1Y3	Uncharacterized protein OS=Bos taurus OX=9913 PE=3 SV=1	2	4.891	0.869	2.117	0.361	1.163	0.536	0.888	0.543	2.623	0.899	1.306	2.086	0.822	0.727	0.649	0.343	0.812	0.189	0.816	1.898	1.033	1.505	0.91	0.342	0.27	1.364	0.472	5.643	0.542	0.367	0.666	0.438	0.64	5.099	1.075	0.356	3.982	0.36	0.606	0.642	0.746	0.362	1.123	0.339	1.134	0.336	0.934
G3N1I8	Uncharacterized protein OS=Bos taurus OX=9913 PE=4 SV=1	2	1.206							0.886		1.006							0.925		1.024		1.662	2.156				1.165							1.374								0.82	1.008	1
G5E5H2	Uncharacterized protein OS=Bos taurus OX=9913 PE=4 SV=1	2			1.23	1.038		1.044									1.647	0.988		1.134							1.204										0.845	1.063			1.153							0.885
G3X7F3	Uncharacterized protein OS=Bos taurus OX=9913 PE=4 SV=1	2	0.968	0.984	1.36	0.92	1.05	1.466	1.351	1.063	1.022	1.127	1.278	1.429	0.98	0.983	1.293	0.772	1.083	0.904	0.852		1.043	1.104	1.301	0.968	0.871	0.967	1.051	1.046	0.898		1.261	0.996	1.224	0.775	0.747	0.987		0.881	1.371		1.326	1.146	0.765	1	0.995	1.219	1.701
P00744	Vitamin K-dependent protein Z OS=Bos taurus OX=9913 GN=PROZ PE=1 SV=1	2	1.293	1.105	1.044	1.216	0.969	0.91	1.109		1.437	1.05	1.17	1.309	1.22	1.257	1.272	0.953		0.934	1.073	1.24	1.252	1.124	1.011	0.971	1.229		0.995	1.135	1.012	1.006	0.957	1.052	1.033	0.636	0.847	0.816	0.798	1.014	1.173	0.771	1.23		0.894	0.933	0.77	0.994	0.991
G1K1X9	Vitamin K-dependent protein Z OS=Bos taurus OX=9913 GN=PROZ PE=3 SV=1	2	1.293	1.105	1.044	1.216	0.969	0.91	1.109		1.437	1.05	1.17	1.309	1.22	1.257	1.272	0.953		0.934	1.073	1.24	1.252	1.124	1.011	0.971	1.229		0.995	1.135	1.012	1.006	0.957	1.052	1.033	0.636	0.847	0.816	0.798	1.014	1.173	0.771	1.23		0.894	0.933	0.77	0.994	0.991
P80012	von Willebrand factor (Fragment) OS=Bos taurus OX=9913 GN=VWF PE=1 SV=2	2	1.298		1.098	1.213				0.888		1.033	1.078			1.487	1.237		1.07	1.148		1.184	1.351				0.996	1.345				0.873			1.113			0.893	0.808	0.803	0.958	0.728	1.064	0.989				0.875
F5XVA9	von Willebrand factor OS=Bos taurus OX=9913 GN=VWF PE=2 SV=1	2	1.298		1.098	1.213				0.888		1.033	1.078			1.487	1.237		1.07	1.148		1.184	1.351				0.996	1.345				0.873			1.113			0.893	0.808	0.803	0.958	0.728	1.064	0.989				0.875
F1N0R5	von Willebrand factor OS=Bos taurus OX=9913 GN=VWF PE=4 SV=2	2	1.298		1.098	1.213				0.888		1.033	1.078			1.487	1.237		1.07	1.148		1.184	1.351				0.996	1.345				0.873			1.113			0.893	0.808	0.803	0.958	0.728	1.064	0.989				0.875
B2BX70	Zn-alpha-2-glycoprotein (Fragment) OS=Bos taurus OX=9913 PE=4 SV=1	2		1.053	1.222	1.183	1.05	0.973	1.029		1.218			1.462	0.896		1.277	0.689		0.945	0.935	1.36		1.044	1.054		1.222			1.127	1.064	1.285	1.094			0.849	0.917	0.754	1.136		1.201	0.992			0.973	0.863		0.965	1.071
B2BX71	Zn-alpha-2-glycoprotein (Fragment) OS=Bos taurus OX=9913 PE=4 SV=1	2		1.053	1.222	1.183	1.05	0.973	1.029		1.218			1.462	0.896		1.277	0.689		0.945	0.935	1.36		1.044	1.054		1.222			1.127	1.064	1.285	1.094			0.849	0.917	0.754	1.136		1.201	0.992			0.973	0.863		0.965	1.071
B2BX69	Zn-alpha-2-glycoprotein (Fragment) OS=Bos taurus OX=9913 PE=4 SV=1	2		1.053	1.222	1.183	1.05	0.973	1.029		1.218			1.462	0.896		1.277	0.689		0.945	0.935	1.36		1.044	1.054		1.222			1.127	1.064	1.285	1.094			0.849	0.917	0.754	1.136		1.201	0.992			0.973	0.863		0.965	1.071
B7FEK7	43kDa collectin OS=Bos taurus OX=9913 GN=CL43 PE=4 SV=1	1	1.622	0.912	1.588	1.675	0.826	1.022	1.418	0.495	1.743	1.143	1.445	1.94	1.296	0.875	2.305	0.652	2.645	1.69	1.336	2.247	0.573	0.634	1.325	1.221	1.29	1.033	0.765	1.969	0.906	0.756	1.273	1.343	1.446	0.51	0.392	0.839	1.299	1.012	0.881	0.72	0.266	0.598	0.767	0.936	1.077	0.892	0.871
Q95M17	Acidic mammalian chitinase OS=Bos taurus OX=9913 GN=CHIA PE=1 SV=1	1																			1.09			1.067																					0.831
P60712	Actin, cytoplasmic 1 OS=Bos taurus OX=9913 GN=ACTB PE=1 SV=1	1
F1MRD0	Actin, cytoplasmic 1 OS=Bos taurus OX=9913 GN=ACTB PE=3 SV=2	1
P63258	Actin, cytoplasmic 2 OS=Bos taurus OX=9913 GN=ACTG1 PE=1 SV=1	1
E1BLG0	Adenylate kinase 8 OS=Bos taurus OX=9913 GN=AK8 PE=3 SV=1	1			1.77			1.03									1.756	0.553									1.422										1.06	1.096
K4JBA5	Alpha-2-macroglobulin variant 14 OS=Bos taurus OX=9913 GN=A2M PE=2 SV=1	1	1.173	1.164	1.161	1.198	1.054	0.827	1.239	0.809	1.201	0.99	1.266	1.486	1.157	1.014	1.494	0.633	1.16	1.05	0.916	1.376	1.178	0.988	1.086	0.937	0.888	1.408	0.94	1.109	0.879	1.113	1.169	1.013	1.059	0.987	0.732	0.754	0.93	0.917	1.317	0.903	1.165	1.049	0.812	0.974	0.955	1.025	0.948
K4JDS8	Alpha-2-macroglobulin variant 15 OS=Bos taurus OX=9913 GN=A2M PE=2 SV=1	1	1.768	1.268	1.309	1.293	1.088	0.967	1.411	0.779	1.525	1.365	1.118	1.511	1.048	0.977	2.109	0.673	1.294	1.088	0.883	1.387	1.327	1.054	1.317	1.005	1.029	1.404	0.888	1.195	1.05	1.189	1.375	0.973	1.322	1.518	0.881	1.066	1.136	1.104	1.233	0.798	1.243	1.516	0.881	1.076	0.903	1.118	1.113
K4JR84	Alpha-2-macroglobulin variant 17 OS=Bos taurus OX=9913 GN=A2M PE=2 SV=1	1	1.173	1.164	1.161	1.198	1.054	0.827	1.239	0.809	1.201	0.99	1.266	1.486	1.157	1.014	1.494	0.633	1.16	1.05	0.916	1.376	1.178	0.988	1.086	0.937	0.888	1.408	0.94	1.109	0.879	1.113	1.169	1.013	1.059	0.987	0.732	0.754	0.93	0.917	1.317	0.903	1.165	1.049	0.812	0.974	0.955	1.025	0.948
K4JBB0	Alpha-2-macroglobulin variant 19 OS=Bos taurus OX=9913 GN=A2M PE=2 SV=1	1	1.173	1.164	1.161	1.198	1.054	0.827	1.239	0.809	1.201	0.99	1.266	1.486	1.157	1.014	1.494	0.633	1.16	1.05	0.916	1.376	1.178	0.988	1.086	0.937	0.888	1.408	0.94	1.109	0.879	1.113	1.169	1.013	1.059	0.987	0.732	0.754	0.93	0.917	1.317	0.903	1.165	1.049	0.812	0.974	0.955	1.025	0.948
K4JBT0	Alpha-2-macroglobulin variant 21 OS=Bos taurus OX=9913 GN=A2M PE=2 SV=1	1	1.173	1.164	1.161	1.198	1.054	0.827	1.239	0.809	1.201	0.99	1.266	1.486	1.157	1.014	1.494	0.633	1.16	1.05	0.916	1.376	1.178	0.988	1.086	0.937	0.888	1.408	0.94	1.109	0.879	1.113	1.169	1.013	1.059	0.987	0.732	0.754	0.93	0.917	1.317	0.903	1.165	1.049	0.812	0.974	0.955	1.025	0.948
Q3SZ57	Alpha-fetoprotein OS=Bos taurus OX=9913 GN=AFP PE=2 SV=1	1	1.417	0.973	1.213	1.211	1.127	0.968	1.321	0.552	1.443	0.933	1.376	1.553	1.037	0.795	1.594	0.503	1.33	1.554	1.556	1.314	0.963	1.266	1.102	1.118	1.243	0.66	0.899	1.264	1.178	1.216	1.217	1.05	1.171	0.944	1.184	0.735	1.067	1.052	0.922	0.856	1.517	1.066	0.965	0.856	0.827	1.093	0.944
E1BC09	Amine oxidase OS=Bos taurus OX=9913 GN=AOC2 PE=3 SV=1	1	1.191	1.191	1.256	1.098	1.044	1.151	1.292	0.869	1.237	1.002	1.491	1.368	0.904	0.957	1.646	0.714	1.1	0.931	0.806	1.149	0.903	1.199	1.066	0.991	1.275	0.793	0.872	1.01	1.065	1.097	1.169	0.936	0.905	0.955	0.937	0.906	0.808	1.233	1.144	0.717	1.131	1.1	0.696	0.896	0.772	0.969	1.082
Q3SYR5	Apolipoprotein C-IV OS=Bos taurus OX=9913 GN=APOC4 PE=2 SV=1	1			1.213	1.466			1.227		1.666			1.416	1.242		1.472			0.876					1.256	1.102	0.913		0.723	0.918	0.877		0.952	1.249		1.607		0.842			1.589					0.872	0.666	1.467
Q2KIH2	ApoN protein OS=Bos taurus OX=9913 GN=ApoN PE=2 SV=1	1	1.53	1.212	1.036	1.34	1.086	1.008		0.675	1.462	1.103	1.167			1.053	1.438	0.616	1.103	0.922	0.72	1.281	1.01	1.174	0.992	1.151	1.438	0.784	0.843	1.052	1.064	1.175	1.039	1.206	1.217	0.97	0.923	0.996	0.917	1.127	0.982	0.975	1.078	1.109	1.01		0.898	1.085	1.04
P17690	Beta-2-glycoprotein 1 OS=Bos taurus OX=9913 GN=APOH PE=1 SV=4	2	1.39	1.037	1.191	1.349	1.077	0.964	1.101	0.765	1.292	1.004	1.298	1.41	1.063	1.009	1.512	0.671	1.607	1.06	1.192	1.365	1.092	1.229	1.08	1.061	1.375	0.875	0.91	1.285	0.993	0.98	1.226	1.174	0.983	0.938	0.918	0.783	0.946	0.933	1.133	0.769	1.299	0.756	0.939	0.857	0.825	0.937	0.985
A0A140T843	Beta-2-glycoprotein 1 OS=Bos taurus OX=9913 GN=APOH PE=4 SV=1	1	1.39	1.037	1.191	1.349	1.077	0.964	1.101	0.765	1.292	1.004	1.298	1.41	1.063	1.009	1.512	0.671	1.607	1.06	1.192	1.365	1.092	1.229	1.08	1.061	1.375	0.875	0.91	1.285	0.993	0.98	1.226	1.174	0.983	0.938	0.918	0.783	0.946	0.933	1.133	0.769	1.299	0.756	0.939	0.857	0.825	0.937	0.985
Q862Q3	Beta-2-microglobulin (Fragment) OS=Bos taurus OX=9913 PE=2 SV=1	1											1.233			1.084																								1.104
P01888	Beta-2-microglobulin OS=Bos taurus OX=9913 GN=B2M PE=1 SV=2	1											1.233			1.084																								1.104
Q2QJG3	Beta-actin (Fragment) OS=Bos taurus OX=9913 PE=2 SV=1	1
P02666	Beta-casein OS=Bos taurus OX=9913 GN=CSN2 PE=1 SV=2	1		1.167			1.234				1.969											1.652			1.02	1.097			1.206	1.152	1.164	1.457	1.51	1.284		2.172			1.774			1.085					0.839		1.117
T1T0C1	Beta-casein OS=Bos taurus OX=9913 GN=csn2 PE=2 SV=1	1		1.167			1.234				1.969											1.652			1.02	1.097			1.206	1.152	1.164	1.457	1.51	1.284		2.172			1.774			1.085					0.839		1.117
Q1RMH5	C1QC protein (Fragment) OS=Bos taurus OX=9913 GN=C1QC PE=2 SV=1	1	1.118							0.892		1.093							1.274				1.3					1.052							1.019								1.165	1.009
Q1RMN9	C4b-binding protein alpha-like OS=Bos taurus OX=9913 GN=LOC510860 PE=2 SV=1	1	1.237		1.296	1.047		1.099	1.057	0.985		1.271		1.403	1.135		1.683	0.817	1.281	0.988	1.045	1.101	1.137	1.09	1.191		1.361	1.661		0.817		0.928	1.345		1.138		1.005	0.807	0.971		1.146	0.831	1.326	1.032	0.953	0.868		0.783
P00732	Carboxypeptidase B OS=Bos taurus OX=9913 GN=CPB1 PE=1 SV=2	1	1.305			1.14		1.117	1.161	1.037	1.095	1.047	1.325	1.389	0.91	1.25		0.8	1.089	0.929	0.924		1.141	1.006		1.159		1.133	1.05		0.982			1.127	0.878	0.786	0.902			0.944	1.005		0.959	0.891	0.907	1.031	0.679	0.91
Q2KJ83	Carboxypeptidase N catalytic chain OS=Bos taurus OX=9913 GN=CPN1 PE=2 SV=1	1						1.078										0.841																			0.992
G5E5V0	Carboxypeptidase N catalytic chain OS=Bos taurus OX=9913 GN=CPN1 PE=4 SV=1	1						1.078										0.841																			0.992
Q1PBC8	CD14 (Fragment) OS=Bos taurus OX=9913 PE=4 SV=1	1			1.49				1.314					1.535	1.461		1.311								1.564	1.155	1.341		1.096	1.528			2.394	1.164				1.049								0.976	1.374
F1N4T3	Cholinergic receptor nicotinic alpha 2 subunit OS=Bos taurus OX=9913 GN=CHRNA2 PE=3 SV=2	1	1.184		1.513							0.869	1.534			0.744	2.436						0.641		1.232		0.843			1.625			1.163		1.54			0.774		0.888			0.604
F1MG35	Class II major histocompatibility complex transactivator OS=Bos taurus OX=9913 GN=CIITA PE=4 SV=2	1				0.931			0.798					1.123	0.786					0.733	1.361			0.818																	0.868				1.134	1.198		0.828
M5FMX0	Class II transactivator-like OS=Bos taurus OX=9913 GN=LOC508720 PE=4 SV=1	1				0.931			0.798					1.123	0.786					0.733	1.361			0.818																	0.868				1.134	1.198		0.828
F1MBC5	Coagulation factor IX OS=Bos taurus OX=9913 GN=F9 PE=3 SV=2	1								1.392									1.155									1.887																0.711
F1MFY6	Collectin-43 precursor OS=Bos taurus OX=9913 PE=4 SV=2	1	1.622	0.912	1.588	1.675	0.826	1.022	1.418	0.495	1.743	1.143	1.445	1.94	1.296	0.875	2.305	0.652	2.645	1.69	1.336	2.247	0.573	0.634	1.325	1.221	1.29	1.033	0.765	1.969	0.906	0.756	1.273	1.343	1.446	0.51	0.392	0.839	1.299	1.012	0.881	0.72	0.266	0.598	0.767	0.936	1.077	0.892	0.871
Q5E9E3	Complement C1q subcomponent subunit A OS=Bos taurus OX=9913 GN=C1QA PE=2 SV=1	1		0.86	1.191	1.317	0.685										1.032			1.05							1.573											1.038			0.89							1.157	1.172
P12082	Complement C5a anaphylatoxin OS=Bos taurus OX=9913 GN=C5 PE=1 SV=1	1		0.959	1.177	1.19	1.22	1.068	1.155	1.042	1.144		1.368	1.409	1.104	1.38	1.385	0.902	1.274	0.991	0.936	1.286		1.264		1.132	1.195	1.17	1.072		1.228	1.128		1.054		0.667	0.86	0.784	0.887	0.935	1.128	0.721		0.749	0.875	0.891	0.723	0.963	0.965
Q1A7A4	Complement component C5a (Fragment) OS=Bos taurus OX=9913 PE=2 SV=1	1		0.959	1.177	1.19	1.22	1.068	1.155	1.042	1.144		1.368	1.409	1.104	1.38	1.385	0.902	1.274	0.991	0.936	1.286		1.264		1.132	1.195	1.17	1.072		1.228	1.128		1.054		0.667	0.86	0.784	0.887	0.935	1.128	0.721		0.749	0.875	0.891	0.723	0.963	0.965
Q17QC8	Complement factor properdin OS=Bos taurus OX=9913 GN=CFP PE=2 SV=1	1	0.977	0.998	1.185	1.036	1.246				1.163	0.932					1.985			0.975	0.825	1.367	1.067	1.332	1.171	0.99	0.873		0.989	1.086	0.972	1.103	1.204	1.11	1.063	0.665		0.944	0.949		0.74	0.853	1.216		1.001		0.871	0.952	0.812
Q32P72	CP protein (Fragment) OS=Bos taurus OX=9913 GN=CP PE=2 SV=1	1	1.16	1.484	0.999		1.104		1.401		1.165	1.381	0.861	1.137	0.663	1.418	1.692				0.841	1.114	1.339	1.449	1.022		1.288			0.872	1.007	1.02	1.079		1.022	0.705		1.09	0.531	0.927		0.758	1.176		0.683	1.188			1.043
A7YWU8	CPB1 protein OS=Bos taurus OX=9913 GN=CPB1 PE=2 SV=1	1	1.305			1.14		1.117	1.161	1.037	1.095	1.047	1.325	1.389	0.91	1.25		0.8	1.089	0.929	0.924		1.141	1.006		1.159		1.133	1.05		0.982			1.127	0.878	0.786	0.902			0.944	1.005		0.959	0.891	0.907	1.031	0.679	0.91
E1BKT9	Desmoplakin OS=Bos taurus OX=9913 GN=DSP PE=1 SV=1	1							0.977					1.487	2.573																															0.985
A2VE41	EGF-containing fibulin-like extracellular matrix protein 1 OS=Bos taurus OX=9913 GN=EFEMP1 PE=1 SV=1	1	1.272					0.914				0.967						0.634			0.863		0.948	1.113											1.032		0.916						1.142		0.894
A6QPZ2	F9 protein OS=Bos taurus OX=9913 GN=F9 PE=2 SV=1	1								1.392									1.155									1.887																0.711
A6QPX7	FGB protein (Fragment) OS=Bos taurus OX=9913 GN=FGB PE=2 SV=1	1	1.117					0.842				0.904						0.888					0.946												0.845		0.718						1.078
P02676	Fibrinogen beta chain OS=Bos taurus OX=9913 GN=FGB PE=1 SV=2	1	1.117					0.842				0.904						0.888					0.946												0.845		0.718						1.078
F1MAV0	Fibrinogen beta chain OS=Bos taurus OX=9913 GN=FGB PE=4 SV=2	1	1.117					0.842				0.904						0.888					0.946												0.845		0.718						1.078
Q865Z7	Fibronectin (Fragment) OS=Bos taurus OX=9913 PE=2 SV=1	1			1.164			1.259		1.025							1.375	0.843	1.082						1.269		1.458	1.507		1.357			1.081				1.118	0.993						0.861
P52556	Flavin reductase (NADPH) OS=Bos taurus OX=9913 GN=BLVRB PE=1 SV=2	1
Q28115	Glial fibrillary acidic protein OS=Bos taurus OX=9913 GN=GFAP PE=1 SV=2	1	2.072	2.095	1.269	2.532	2.426	1.218	1.052	0.957	1.302	1.175		1.648	3.955		2.084	0.705	0.759	0.964	0.872	1.585	1.365	1.04	0.768	1.68	0.968	1.286	1.221	1.529	1.315	1.503	0.86	0.954	1.317	2.349	1.386	0.946	1.296		1.08	1.776	1.585	0.806	1.075	1.406	1.07	0.701	1.755
E1BEL8	Globin B1 OS=Bos taurus OX=9913 GN=HBE1 PE=3 SV=1	1	4.425	0.765	1.803	0.289	1.024	0.458	0.76	0.468	2.589	0.755	1.102	1.797	0.688	0.66	0.531	0.284	0.713	0.142	0.556	1.575	0.859	1.008	0.75	0.266	0.198	1.243	0.348	5.559	0.388	0.26	0.549	0.358	0.477	5.231	0.977	0.301	3.362	0.302	0.506	0.477	0.621	0.299	0.726	0.293	0.928	0.266	0.808
O62659	Hair keratin A1 (Fragment) OS=Bos taurus OX=9913 GN=HKA1 PE=4 SV=1	1																								1.176			3.554					1.205													0.927
P01966	Hemoglobin subunit alpha OS=Bos taurus OX=9913 GN=HBA PE=1 SV=2	1	3.941	0.782	1.705	0.402	1.017	0.492	0.876	0.665	2.059	0.802	1.2	1.5	0.693	0.928	0.79	0.383	0.852	0.285	0.701	1.288	1.177	1.065	0.821	0.492	0.483	1.155	0.631	3.787	0.543	0.432	0.541	0.555	0.584	3.798	0.991	0.394	2.162	0.422	0.657	0.65	0.893	0.517	0.717	0.459	0.944	0.414	0.909
P06643	Hemoglobin subunit epsilon-4 OS=Bos taurus OX=9913 GN=HBE4 PE=2 SV=2	1																			0.949			1.228																					4.786
E1BCW0	Hepatocyte growth factor activator preproprotein OS=Bos taurus OX=9913 PE=3 SV=2	1		1.262			1.351				1.163																				1.34					0.849													1.012
Q24K22	Hepatocyte growth factor-like protein OS=Bos taurus OX=9913 GN=MST1 PE=2 SV=1	1
E1BDW7	Hepatocyte growth factor-like protein OS=Bos taurus OX=9913 GN=MST1 PE=3 SV=2	1
E1BGN3	Histone H3 OS=Bos taurus OX=9913 GN=HIST2H3D PE=3 SV=1	1																								1.08			5.781					1.506													0.773
G3MYD7	Histone H3 OS=Bos taurus OX=9913 GN=LOC100297725 PE=3 SV=1	1																								1.08			5.781					1.506													0.773
P68432	Histone H3.1 OS=Bos taurus OX=9913 PE=1 SV=2	1																								1.08			5.781					1.506													0.773
P84227	Histone H3.2 OS=Bos taurus OX=9913 PE=1 SV=2	1																								1.08			5.781					1.506													0.773
Q5E9F8	Histone H3.3 OS=Bos taurus OX=9913 GN=H3F3A PE=1 SV=3	1																								1.08			5.781					1.506													0.773
A5PK61	Histone H3.3C OS=Bos taurus OX=9913 GN=H3F3C PE=2 SV=1	1																								1.08			5.781					1.506													0.773
Q3SZB8	Histone H3.3C-like OS=Bos taurus OX=9913 PE=2 SV=3	1																								1.08			5.781					1.506													0.773
F1N2P8	Insulin like growth factor binding protein 2 OS=Bos taurus OX=9913 GN=IGFBP2 PE=4 SV=2	1								0.819									1.128									1.009																1.026
I3PGL3	Insulin-like growth factor 2 (Fragment) OS=Bos taurus OX=9913 GN=IGF2 PE=2 SV=1	1						1.063										0.831																			0.836
Q2F6J3	Insulin-like growth factor 2 preproprotein (Fragment) OS=Bos taurus OX=9913 GN=IGF2 PE=2 SV=1	1						1.063										0.831																			0.836
P07456	Insulin-like growth factor II OS=Bos taurus OX=9913 GN=IGF2 PE=1 SV=4	1						1.063										0.831																			0.836
P13384	Insulin-like growth factor-binding protein 2 OS=Bos taurus OX=9913 GN=IGFBP2 PE=1 SV=2	1								0.819									1.128									1.009																1.026
F6S1Q0	Keratin 18 OS=Bos taurus OX=9913 GN=KRT18 PE=1 SV=1	1		2.197	1.205	1.865	1.46			1.068	1.493						2.657		1.195	0.879							1.109	1.702			1.824					2.397		0.896			1.137			0.806				0.577	1.788
F1MFW9	Keratin 24 OS=Bos taurus OX=9913 GN=KRT24 PE=3 SV=2	1		2.197	1.205	1.865	1.46			1.068	1.493						2.657		1.195	0.879							1.109	1.702			1.824					2.397		0.896			1.137			0.806				0.577	1.788
G3MYU2	Keratin 77 OS=Bos taurus OX=9913 GN=KRT77 PE=1 SV=1	1
F1N362	Keratin 84 OS=Bos taurus OX=9913 GN=KRT84 PE=3 SV=2	1	2.072	2.095	1.269	2.532	2.426	1.218	1.052	0.957	1.302	1.175		1.648	3.955		2.084	0.705	0.759	0.964	0.872	1.585	1.365	1.04	0.768	1.68	0.968	1.286	1.221	1.529	1.315	1.503	0.86	0.954	1.317	2.349	1.386	0.946	1.296		1.08	1.776	1.585	0.806	1.075	1.406	1.07	0.701	1.755
Q05B46	Keratin associated protein 11-1 OS=Bos taurus OX=9913 GN=KRTAP11-1 PE=2 SV=1	1																								1.417			19.845					1.667													1.226
A1A4M9	Keratin associated protein 13-1 OS=Bos taurus OX=9913 GN=KRTAP13-1 PE=2 SV=1	1																								1.059			2.135					1.103													0.844
F1MTA9	Keratin associated protein 8-1 OS=Bos taurus OX=9913 GN=KRTAP8-1 PE=4 SV=1	1																								1.012			2.894					1.236													1.185
Q0VC31	Keratin associated protein-like OS=Bos taurus OX=9913 GN=LOC777598 PE=2 SV=1	1																							1.653	0.976			5.574	1.333			0.857	1.086													0.756
Q0P5J4	Keratin, type I cytoskeletal 25 OS=Bos taurus OX=9913 GN=KRT25 PE=2 SV=1	1	1.346	2.274			1.272		1.029	0.855		0.918		1.187	4.715				1.072				1.234					0.876							1.151								1.832	0.832		0.924			1.601
Q0P5J6	Keratin, type I cytoskeletal 27 OS=Bos taurus OX=9913 GN=KRT27 PE=2 SV=1	1	1.346	2.274			1.272		1.029	0.855		0.918		1.187	4.715				1.072				1.234					0.876							1.151								1.832	0.832		0.924			1.601
P04260	Keratin, type II cytoskeletal 59 kDa, component IV (Fragment) OS=Bos taurus OX=9913 PE=2 SV=1	1							0.471					1.676	2.097																															1.326
P04261	Keratin, type II cytoskeletal 60 kDa, component III (Fragment) OS=Bos taurus OX=9913 PE=2 SV=1	1							0.471					1.676	2.097																															1.326
P04263	Keratin, type II cytoskeletal 68 kDa, component IA (Fragment) OS=Bos taurus OX=9913 PE=2 SV=1	1	2.072	2.095	1.269	2.532	2.426	1.218	1.052	0.957	1.302	1.175		1.648	3.955		2.084	0.705	0.759	0.964	0.872	1.585	1.365	1.04	0.768	1.68	0.968	1.286	1.221	1.529	1.315	1.503	0.86	0.954	1.317	2.349	1.386	0.946	1.296		1.08	1.776	1.585	0.806	1.075	1.406	1.07	0.701	1.755
P04262	Keratin, type II cytoskeletal 68 kDa, component IB (Fragment) OS=Bos taurus OX=9913 PE=2 SV=1	1							0.471					1.676	2.097																															1.326
Q148H8	Keratin, type II cytoskeletal 72 OS=Bos taurus OX=9913 GN=KRT72 PE=2 SV=1	1							0.471					1.676	2.097																															1.326
A6QNX5	Keratin, type II cytoskeletal 78 OS=Bos taurus OX=9913 GN=KRT78 PE=2 SV=1	1							0.471					1.676	2.097																															1.326
Q148H7	Keratin, type II cytoskeletal 79 OS=Bos taurus OX=9913 GN=KRT79 PE=2 SV=1	1
P05786	Keratin, type II cytoskeletal 8 OS=Bos taurus OX=9913 GN=KRT8 PE=2 SV=3	1		1.529			1.378		0.886					1.221	3.47																															0.796			1.609
F1MU12	Keratin, type II cytoskeletal 8 OS=Bos taurus OX=9913 GN=KRT8 PE=3 SV=1	1		1.529			1.378		0.886					1.221	3.47																															0.796			1.609
A0JND2	Keratin, type II cytoskeletal 80 OS=Bos taurus OX=9913 GN=KRT80 PE=2 SV=1	1	2.072	2.095	1.269	2.532	2.426	1.218	1.052	0.957	1.302	1.175		1.648	3.955		2.084	0.705	0.759	0.964	0.872	1.585	1.365	1.04	0.768	1.68	0.968	1.286	1.221	1.529	1.315	1.503	0.86	0.954	1.317	2.349	1.386	0.946	1.296		1.08	1.776	1.585	0.806	1.075	1.406	1.07	0.701	1.755
A6H7D3	KRT18 protein (Fragment) OS=Bos taurus OX=9913 GN=KRT18 PE=2 SV=1	1		2.197	1.205	1.865	1.46			1.068	1.493						2.657		1.195	0.879							1.109	1.702			1.824					2.397		0.896			1.137			0.806				0.577	1.788
A6QP32	KRT85 protein OS=Bos taurus OX=9913 GN=KRT89 PE=2 SV=1	1																								1.409			2.942					1.371													0.936
C7FE01	Lactoferrin (Fragment) OS=Bos taurus OX=9913 PE=2 SV=1	1	1.328	1.03	1.271	1.385	0.974	0.907	1.103	0.781	1.417	1.071	1.43	1.415	0.953	0.744	1.467	0.676	1.205	1.168	1.087	1.504	0.833	1.043	0.94	0.871	1.191	0.982	0.847	1.078	0.854	0.96	1.147	0.932	0.913	0.843	1.118	0.769	0.997	1.019	1.039	0.743	1.176	1.065	1.127	0.937	0.739	0.863	0.836
Q6LBN7	Lactoferrin (Fragment) OS=Bos taurus OX=9913 PE=2 SV=1	1	1.328	1.03	1.271	1.385	0.974	0.907	1.103	0.781	1.417	1.071	1.43	1.415	0.953	0.744	1.467	0.676	1.205	1.168	1.087	1.504	0.833	1.043	0.94	0.871	1.191	0.982	0.847	1.078	0.854	0.96	1.147	0.932	0.913	0.843	1.118	0.769	0.997	1.019	1.039	0.743	1.176	1.065	1.127	0.937	0.739	0.863	0.836
B3VTM3	Lactoferrin OS=Bos taurus OX=9913 PE=2 SV=1	1	1.328	1.03	1.271	1.385	0.974	0.907	1.103	0.781	1.417	1.071	1.43	1.415	0.953	0.744	1.467	0.676	1.205	1.168	1.087	1.504	0.833	1.043	0.94	0.871	1.191	0.982	0.847	1.078	0.854	0.96	1.147	0.932	0.913	0.843	1.118	0.769	0.997	1.019	1.039	0.743	1.176	1.065	1.127	0.937	0.739	0.863	0.836
Q8MII0	Lactotransferrin (Fragment) OS=Bos taurus OX=9913 PE=2 SV=1	1	1.328	1.03	1.271	1.385	0.974	0.907	1.103	0.781	1.417	1.071	1.43	1.415	0.953	0.744	1.467	0.676	1.205	1.168	1.087	1.504	0.833	1.043	0.94	0.871	1.191	0.982	0.847	1.078	0.854	0.96	1.147	0.932	0.913	0.843	1.118	0.769	0.997	1.019	1.039	0.743	1.176	1.065	1.127	0.937	0.739	0.863	0.836
P24627	Lactotransferrin OS=Bos taurus OX=9913 GN=LTF PE=1 SV=2	1	1.328	1.03	1.271	1.385	0.974	0.907	1.103	0.781	1.417	1.071	1.43	1.415	0.953	0.744	1.467	0.676	1.205	1.168	1.087	1.504	0.833	1.043	0.94	0.871	1.191	0.982	0.847	1.078	0.854	0.96	1.147	0.932	0.913	0.843	1.118	0.769	0.997	1.019	1.039	0.743	1.176	1.065	1.127	0.937	0.739	0.863	0.836
Q2KIW4	Lecithin-cholesterol acyltransferase OS=Bos taurus OX=9913 GN=LCAT PE=2 SV=1	1			1.189												1.431										0.957											0.812
P19858	L-lactate dehydrogenase A chain OS=Bos taurus OX=9913 GN=LDHA PE=2 SV=2	1						1.405										0.982																			0.704
Q5E9B1	L-lactate dehydrogenase B chain OS=Bos taurus OX=9913 GN=LDHB PE=2 SV=4	1						1.405										0.982																			0.704
B0JYN3	L-lactate dehydrogenase OS=Bos taurus OX=9913 GN=LDHB PE=2 SV=1	1						1.405										0.982																			0.704
Q2KJG0	L-lactate dehydrogenase OS=Bos taurus OX=9913 GN=LDHC PE=2 SV=1	1						1.405										0.982																			0.704
F1MK19	L-lactate dehydrogenase OS=Bos taurus OX=9913 GN=LDHC PE=3 SV=1	1						1.405										0.982																			0.704
E1BNS9	L-lactate dehydrogenase OS=Bos taurus OX=9913 GN=LDHC PE=3 SV=2	1						1.405										0.982																			0.704
A5PJJ0	LOC618938 protein OS=Bos taurus OX=9913 GN=LOC618938 PE=2 SV=1	1																							1.653	0.976			5.574	1.333			0.857	1.086													0.756
A5PJJ4	LOC787225 protein OS=Bos taurus OX=9913 GN=LOC787225 PE=2 SV=1	1																							1.653	0.976			5.574	1.333			0.857	1.086													0.756
A6QPD4	LOC790886 protein OS=Bos taurus OX=9913 GN=LOC790886 PE=2 SV=1	1			1.153												1.385										1.138											0.78
A6H701	LRRTM2 protein OS=Bos taurus OX=9913 GN=LRRTM2 PE=2 SV=1	1
Q05443	Lumican OS=Bos taurus OX=9913 GN=LUM PE=1 SV=1	1
E1BJ49	Mannan binding lectin serine peptidase 2 OS=Bos taurus OX=9913 GN=MASP2 PE=3 SV=2	1		1.438	1.115	1.079	1.52						1.119			1.604	1.456			1.118							1.159											1.282		1.01	0.957							0.789	0.866
Q28146	Neurexin-1 OS=Bos taurus OX=9913 GN=NRXN1 PE=1 SV=1	1				1.03			2.273		1.373		1.23	2.212	1.402	0.478				0.394	0.445			1.378	1.466					2.89	0.535		1.466			1.176				0.664	0.909				0.841	0.348		1.561
F1MSQ6	Neurofilament heavy OS=Bos taurus OX=9913 GN=NEFH PE=3 SV=2	1							0.471					1.676	2.097																															1.326
Q68RU0	Ovarian and testicular apolipoprotein N OS=Bos taurus OX=9913 GN=ApoN PE=2 SV=1	1	1.53	1.212	1.036	1.34	1.086	1.008		0.675	1.462	1.103	1.167			1.053	1.438	0.616	1.103	0.922	0.72	1.281	1.01	1.174	0.992	1.151	1.438	0.784	0.843	1.052	1.064	1.175	1.039	1.206	1.217	0.97	0.923	0.996	0.917	1.127	0.982	0.975	1.078	1.109	1.01		0.898	1.085	1.04
Q2KIW1	Paraoxonase 1 OS=Bos taurus OX=9913 GN=PON1 PE=1 SV=1	1	1.24	0.851		1.158	1.238	1.106		1.183	1.417	0.913	1.399			1.145		0.883	1.123	0.81		1.115	1.082		1.204	1.056		0.774	1.223	1.028	1.352	1.126	1.491	1.048	1.041	0.856	0.777		1.008	1.065	0.971	0.86	1.146	0.847			1.127	0.942	1.006
C4T8B4	Pentaxin OS=Bos taurus OX=9913 GN=CRP PE=2 SV=1	1		1.199	1.2	1.284	1.186		0.976	0.81			1.13	1.192	1.109	1.18	1.43		0.988	0.822	0.882			1.097	1.598	1.341	1.323	0.976	0.994	1.03			1.257	1.321				1.025		0.978	1.121			1.252	1.039	0.845	0.708	1.546	1.061
A1L568	Peptidase D OS=Bos taurus OX=9913 GN=PEPD PE=2 SV=1	1				1.214														0.807																					0.73							0.819
F6Q234	Peptidase D OS=Bos taurus OX=9913 GN=PEPD PE=3 SV=1	1				1.214														0.807																					0.73							0.819
Q9BGI3	Peroxiredoxin-2 OS=Bos taurus OX=9913 GN=PRDX2 PE=2 SV=1	1																				1.304										0.891							1.315			0.704
Q58DL9	Phospholipid transfer protein OS=Bos taurus OX=9913 GN=PLTP PE=2 SV=1	1
Q9N2I2	Plasma serine protease inhibitor OS=Bos taurus OX=9913 GN=SERPINA5 PE=1 SV=1	1		1.072	1.11	1.173	0.974										1.45			0.997		1.295				1.053	1.193		0.937			1.2		1.298				0.854	0.924		1.031	0.895					0.639	0.917	0.921
Q5MAB2	PLTP-like protein (Fragment) OS=Bos taurus OX=9913 PE=4 SV=1	1
E1BC86	Polycystin 1, transient receptor potential channel interacting OS=Bos taurus OX=9913 GN=PKD1 PE=4 SV=1	1		1.011			0.984																			1.071			0.957					1.119													1.154		0.906
A9UIB1	PON1 OS=Bos taurus OX=9913 GN=PON1 PE=2 SV=1	1	1.24	0.851		1.158	1.238	1.106		1.183	1.417	0.913	1.399			1.145		0.883	1.123	0.81		1.115	1.082		1.204	1.056		0.774	1.223	1.028	1.352	1.126	1.491	1.048	1.041	0.856	0.777		1.008	1.065	0.971	0.86	1.146	0.847			1.127	0.942	1.006
G3N0F4	Protease, serine 21 OS=Bos taurus OX=9913 GN=PRSS21 PE=3 SV=1	1
F1MW89	Protease, serine 21 OS=Bos taurus OX=9913 GN=PRSS21 PE=3 SV=2	1
M5FK65	Protease, serine, 21-like OS=Bos taurus OX=9913 GN=PRSS21 PE=3 SV=1	1
F1MDW9	Pyrimidinergic receptor P2Y4 OS=Bos taurus OX=9913 GN=P2RY4 PE=3 SV=2	1	2.129		1.355	1.5		1.037				1.446	1.447			1.061	1.618	0.758		0.827	1.104	1.453	1.119	1.152	0.927		1.182			1.089		1.142	0.943		0.95		1.045	0.709	1.347	0.928	0.817	0.917	1.218		1.16			0.971
Q32L14	Retinol-binding protein OS=Bos taurus OX=9913 GN=RBP4 PE=2 SV=1	1	1.541	1.141	0.965	0.975	1.529	1.205		1.072	1.489	1.109	1.136			1.064	1.815	0.783	1.768	1.301	1.026	1.185	1.32	1.207	1.168	1.444	1.385	1.354	0.672	1.24	1.134	1.189	1.281	1.51	0.919	1.25	1.145	1.107	0.806	1.074	1.007	0.865	0.597	1.158	0.844		0.687	1.39	0.778
F1MBM9	Rho guanine nucleotide exchange factor 7 OS=Bos taurus OX=9913 GN=ARHGEF7 PE=4 SV=2	1			1.159				1.221	0.741				1.289	1.013		1.571		1.143								1.085	0.913										0.94						1.122		0.819
E1BAS3	SAS-6 centriolar assembly protein OS=Bos taurus OX=9913 GN=SASS6 PE=4 SV=1	1			1.004				1.207					1.499	0.858		1.65										0.936											1.016								0.921
Q3T004	Serum amyloid P-component OS=Bos taurus OX=9913 GN=APCS PE=2 SV=1	1			1.12	1.129			1.134		0.65			1.348	0.776		1.349			1.141	1.181	1.371		0.983		0.714	0.741		1.279		1.453	0.674		0.785		0.906		0.926	0.722		1.019	0.781			1.05	0.926	0.828	0.72
E1BHF6	Signal induced proliferation associated 1 like 3 OS=Bos taurus OX=9913 GN=SIPA1L3 PE=4 SV=2	1
Q862P9	Similar to beta actin (Fragment) OS=Bos taurus OX=9913 PE=2 SV=1	1
Q862G1	Similar to insulin-like growth factor II (Fragment) OS=Bos taurus OX=9913 PE=2 SV=1	1						1.063										0.831																			0.836
A3KLR9	Superoxide dismutase [Cu-Zn] OS=Bos taurus OX=9913 GN=SOD3 PE=1 SV=1	1								1.036									1.238									1.198																1.226
F1MSK0	Tetratricopeptide repeat, ankyrin repeat and coiled-coil containing 2 OS=Bos taurus OX=9913 GN=TANC2 PE=4 SV=2	1
F1MW72	Transmembrane channel-like protein OS=Bos taurus OX=9913 GN=TMC1 PE=3 SV=1	1
O46375	Transthyretin OS=Bos taurus OX=9913 GN=TTR PE=1 SV=1	1				1.199		0.947										1.04		1.244	1.073			0.911	0.983	1.065			0.924	0.75			1.059	1.113			0.654				0.906				0.735		0.723	0.853
G3N2P6	Uncharacterized protein OS=Bos taurus OX=9913 GN=KRT42 PE=1 SV=1	1	1.962						1.049			1.898		1.642	3.46								1.128												1.322								1.329			0.876
G3N2P2	Uncharacterized protein OS=Bos taurus OX=9913 GN=LOC613345 PE=3 SV=1	1																								1.08			5.781					1.506													0.773
F1MH40	Uncharacterized protein OS=Bos taurus OX=9913 PE=1 SV=2	1		1.197	1.307	0.894	1.1						1.483			0.975	0.978			1.057		0.954				1.149	1.32		1.215			1.082		1.106				0.954	1.097	0.979	1.488	0.735					0.688	1.115	1.292
G3X8G9	Uncharacterized protein OS=Bos taurus OX=9913 PE=3 SV=1	1		1.529			1.378		0.886					1.221	3.47																															0.796			1.609
E1BIL2	Uncharacterized protein OS=Bos taurus OX=9913 PE=3 SV=2	1	2.072	2.095	1.269	2.532	2.426	1.218	1.052	0.957	1.302	1.175		1.648	3.955		2.084	0.705	0.759	0.964	0.872	1.585	1.365	1.04	0.768	1.68	0.968	1.286	1.221	1.529	1.315	1.503	0.86	0.954	1.317	2.349	1.386	0.946	1.296		1.08	1.776	1.585	0.806	1.075	1.406	1.07	0.701	1.755
E1BFG1	Uncharacterized protein OS=Bos taurus OX=9913 PE=3 SV=2	1		2.197	1.205	1.865	1.46			1.068	1.493						2.657		1.195	0.879							1.109	1.702			1.824					2.397		0.896			1.137			0.806				0.577	1.788
G3MZH0	Uncharacterized protein OS=Bos taurus OX=9913 PE=4 SV=1	1			1.119												1.426					1.173				1.865	0.861		0.751			1.202		2.05				0.983	1.109			0.925					0.777
G3N028	Uncharacterized protein OS=Bos taurus OX=9913 PE=4 SV=1	1
G5E5V1	Uncharacterized protein OS=Bos taurus OX=9913 PE=4 SV=1	1	1.105	0.967	1.286	0.956	1.208	1.165	1.203	1.421	1.201	0.813	1.296	1.086	0.794	1.319	1.577	1.154	0.963	0.85	1.214	1.122	1.206	0.93	0.956	1.093	1.143	1.527	1.352	0.767	0.907	0.9	0.979	1.134	1.017	0.568	1.099	1.092	0.624	0.839	1.164	0.697	0.896	0.634	1.011	1.07	0.806	0.965	0.895
G3X7I5	Uncharacterized protein OS=Bos taurus OX=9913 PE=4 SV=1	1
G3N3Q3	Uncharacterized protein OS=Bos taurus OX=9913 PE=4 SV=1	1	1.473					0.781				0.794						0.547					0.99												1.057		0.561						0.73
G3MXD9	Uncharacterized protein OS=Bos taurus OX=9913 PE=4 SV=1	1			1.119												1.426					1.173				1.865	0.861		0.751			1.202		2.05				0.983	1.109			0.925					0.777
E1B9N2	Uncharacterized protein OS=Bos taurus OX=9913 PE=4 SV=2	1				1.03			2.273		1.373		1.23	2.212	1.402	0.478				0.394	0.445			1.378	1.466					2.89	0.535		1.466			1.176				0.664	0.909				0.841	0.348		1.561
P00745	Vitamin K-dependent protein C (Fragment) OS=Bos taurus OX=9913 GN=PROC PE=1 SV=1	1	1.54							0.89	1.467	0.815							1.215				1.12			0.963		1.043	1.157		0.983			1.163	1.145	0.945							1.248	0.876			0.807
A0A140T851	Vitamin K-dependent protein C OS=Bos taurus OX=9913 GN=PROC PE=3 SV=1	1	1.54							0.89	1.467	0.815							1.215				1.12			0.963		1.043	1.157		0.983			1.163	1.145	0.945							1.248	0.876			0.807
E1BGG4	Yip1 interacting factor homolog B, membrane trafficking protein OS=Bos taurus OX=9913 GN=YIF1B PE=4 SV=2	1											1.305			0.957					0.904			1.129																0.821					0.961
F1MC90	Zinc finger protein 106 OS=Bos taurus OX=9913 GN=ZNF106 PE=4 SV=2	1
[truncated: 17 more columns]
