# Supplementary material for: Integrated Metabolomics and Proteomics Dynamics of Serum Samples Reveals Dietary Zeolite Clinoptilolite Supplementation Restores Energy Balance in High Yielding Dairy Cows
Source: Metabolites. 2021 Dec 5;11(12):842. doi: 10.3390/metabo11120842 (PMC8705350; doi:10.3390/metabo11120842)
Supplement: Supplementary file 1 [file metabolites-11-00842-s001.zip › supplementary files/Supplementary Table S4.xlsx]

## Sheet: 30pre-S vs. 30pre-C
List of significant metabolites based on fc and q values between 30pre-S vs. 30pre-C
Name	Formula	30pre-C1	30pre-C2	30pre-C3	30pre-C4	30pre-C5	30pre-C6	30pre-C7	30pre-C8	30pre-S1	30pre-S2	30pre-S3	30pre-S4	30pre-S5	30pre-S6	30pre-S7	30pre-S8	FC.30PP	LOG.30PP	q
1,2,3-Tris(1-ethoxyethoxy)propane	C15H32O6	954894	1.221e+06	1.22456e+06	1.01754e+06	474237	887834	780612	698448	67807.4	0	139053	325271	130674	298684	69428.6	0	0.108591	-3.20303	0.000191995
Tromethamine	C4H11NO3	450334	497416	668578	491472	306655	396174	533986	596882	199007	165336	195091	204348	88945.9	362265	83696.4	142635	0.364477	-1.4561	0.000388147
(4E,8E,10E-d18:3)sphingosine	C18H33NO2	409093	272514	798104	429712	252595	277952	483893	398361	124125	106615	135329	115659	226385	162099	118466	95091.5	0.300438	-1.73486	0.0161623
Acetyl tributyl citrate	C20H34O8	369748	882842	339387	291387	174704	611141	553035	373181	58093.8	63122.2	47684.5	73163.7	137021	87393	5950.35	119203	0.183444	-2.44659	0.0123678
5S-HETE di-endoperoxide	C20H34O8	369748	882842	339387	291387	174704	611141	553035	373181	58093.8	63122.2	47684.5	73163.7	137021	87393	5950.35	119203	0.183444	-2.44659	0.0123678
Methyprylon	C10H17NO2	214791	165409	537742	306915	225335	292557	264311	246457	129135	67235.7	83890.2	131726	96237.6	131852	64993.7	74911.5	0.352661	-1.50365	0.0135157
Acetyltropine	C10H17NO2	214791	165409	537742	306915	225335	292557	264311	246457	129135	67235.7	83890.2	131726	96237.6	131852	64993.7	74911.5	0.352661	-1.50365	0.0135157
4,5-Dihydrovomifoliol	C13H22O3	222412	227728	195753	200625	155495	156094	174321	194187	113625	65722.5	80269.8	132257	76574.8	127053	63536	55396	0.402228	-1.31392	9.48669e-05
Methyl dihydrojasmonate	C13H22O3	222412	227728	195753	200625	155495	156094	174321	194187	113625	65722.5	80269.8	132257	76574.8	127053	63536	55396	0.402228	-1.31392	9.48669e-05
Riesling acetal	C13H22O3	222412	227728	195753	200625	155495	156094	174321	194187	113625	65722.5	80269.8	132257	76574.8	127053	63536	55396	0.402228	-1.31392	9.48669e-05
Artemether	C16H26O5	290121	236343	317044	288914	319117	324373	302789	401448	50715.4	0	82079.2	49215.9	20860.4	0	0	0	0.0336548	-4.89304	4.0185e-06
Tetranor-PGE1	C16H26O5	290121	236343	317044	288914	319117	324373	302789	401448	50715.4	0	82079.2	49215.9	20860.4	0	0	0	0.0336548	-4.89304	4.0185e-06
Tetranor-PGD1	C16H26O5	290121	236343	317044	288914	319117	324373	302789	401448	50715.4	0	82079.2	49215.9	20860.4	0	0	0	0.0336548	-4.89304	4.0185e-06
Dicyclohexyl disulfide	C12H22S2	48864.6	58296.2	49529.9	39376.9	31042.4	55667.4	41664.7	67284.5	24785.2	16090.5	19433.9	17353.6	15198.6	27807.7	17064	17304.3	0.352235	-1.50539	0.00092501
Butabarbital	C10H16N2O3	154649	219438	156605	136987	128906	140994	187505	131328	98858.4	67604.6	68404	73801.7	76626.6	93153.7	63351.6	60565.4	0.481005	-1.05588	0.000728593
L-prolyl-L-proline	C10H16N2O3	154649	219438	156605	136987	128906	140994	187505	131328	98858.4	67604.6	68404	73801.7	76626.6	93153.7	63351.6	60565.4	0.481005	-1.05588	0.000728593
Butethal	C10H16N2O3	154649	219438	156605	136987	128906	140994	187505	131328	98858.4	67604.6	68404	73801.7	76626.6	93153.7	63351.6	60565.4	0.481005	-1.05588	0.000728593
Hydroxyvalerylcarnitine	C12H25NO5	76122.6	108439	98591.5	83973.6	46175.1	83564.9	49827.7	59081.5	23069.8	22367.2	31767.4	30672.2	21158.1	34514.9	31584.8	28948.6	0.373359	-1.42136	0.00428009
O-glutaroyl-L-carnitine	C12H21NO6	61539.4	84365.9	57276.1	68522.5	58487.3	65085.5	65387.6	51614.3	17040.9	14731.6	21590.2	8021.12	27977	19376.9	21120.1	15039.4	0.287603	-1.79785	5.29411e-06
Glutarylcarnitine	C12H21NO6	61539.4	84365.9	57276.1	68522.5	58487.3	65085.5	65387.6	51614.3	17040.9	14731.6	21590.2	8021.12	27977	19376.9	21120.1	15039.4	0.287603	-1.79785	5.29411e-06
Oleamide	C18H35NO	126904	105916	203795	148259	86432.7	82130.4	204865	146854	73058.5	39612.9	57882.4	60785.5	72792.9	72851.3	46313.7	56030.8	0.433476	-1.20598	0.0132277
Dodemorph	C18H35NO	126904	105916	203795	148259	86432.7	82130.4	204865	146854	73058.5	39612.9	57882.4	60785.5	72792.9	72851.3	46313.7	56030.8	0.433476	-1.20598	0.0132277
Elaidamide	C18H35NO	126904	105916	203795	148259	86432.7	82130.4	204865	146854	73058.5	39612.9	57882.4	60785.5	72792.9	72851.3	46313.7	56030.8	0.433476	-1.20598	0.0132277
Pantothenol	C9H19NO4	47720.7	29625.5	49256.8	50376	23194.7	49717.3	63730.1	87438.3	16950	11462.2	14105.1	25330.5	17447.8	30951.1	35677.9	14719.5	0.347544	-1.52473	0.021625
Pantothenol	C9H19NO4	47720.7	29625.5	49256.8	50376	23194.7	49717.3	63730.1	87438.3	16950	11462.2	14105.1	25330.5	17447.8	30951.1	35677.9	14719.5	0.347544	-1.52473	0.021625
2-Pyrroloylglycine	C7H8N2O3	57474.3	43336.4	46456.9	14407.2	121680	100307	117639	105146	27448	24948.8	25442	18033.4	30416.6	20244.5	21554.5	38123.2	0.319372	-1.64669	0.0486531
2,3-Diaminosalicylic acid	C7H8N2O3	57474.3	43336.4	46456.9	14407.2	121680	100307	117639	105146	27448	24948.8	25442	18033.4	30416.6	20244.5	21554.5	38123.2	0.319372	-1.64669	0.0486531
5-Nitro-ortho-anisidine	C7H8N2O3	57474.3	43336.4	46456.9	14407.2	121680	100307	117639	105146	27448	24948.8	25442	18033.4	30416.6	20244.5	21554.5	38123.2	0.319372	-1.64669	0.0486531
2-Hexenoylcarnitine	C13H23NO4	98852.5	148640	206532	95227.8	67834	67704.7	147116	92031	30985.6	25028.4	30340.2	24083.4	23124.6	47716	22690.7	22592	0.253049	-1.98251	0.00913249
Procurcumadiol	C15H22O3	79405.7	77014.7	64615.2	39276.2	49065.4	71669	52334.1	48857.7	45226.5	30687.1	34369.8	24898.6	24785	43373.5	26671.4	27065.9	0.493829	-1.01792	0.00595117
Piperdial	C15H22O3	79405.7	77014.7	64615.2	39276.2	49065.4	71669	52334.1	48857.7	45226.5	30687.1	34369.8	24898.6	24785	43373.5	26671.4	27065.9	0.493829	-1.01792	0.00595117
3-Hydroxytrichothecene	C15H22O3	79405.7	77014.7	64615.2	39276.2	49065.4	71669	52334.1	48857.7	45226.5	30687.1	34369.8	24898.6	24785	43373.5	26671.4	27065.9	0.493829	-1.01792	0.00595117
(3beta,6beta)-Furanoeremophilane-3,6-diol	C15H22O3	79405.7	77014.7	64615.2	39276.2	49065.4	71669	52334.1	48857.7	45226.5	30687.1	34369.8	24898.6	24785	43373.5	26671.4	27065.9	0.493829	-1.01792	0.00595117
(6beta,8alpha)-6-Hydroxy-7(11)-eremophilen-12,8-olide	C15H22O3	79405.7	77014.7	64615.2	39276.2	49065.4	71669	52334.1	48857.7	45226.5	30687.1	34369.8	24898.6	24785	43373.5	26671.4	27065.9	0.493829	-1.01792	0.00595117
Heliannuol D	C15H22O3	79405.7	77014.7	64615.2	39276.2	49065.4	71669	52334.1	48857.7	45226.5	30687.1	34369.8	24898.6	24785	43373.5	26671.4	27065.9	0.493829	-1.01792	0.00595117
Ketosantalic acid	C15H22O3	79405.7	77014.7	64615.2	39276.2	49065.4	71669	52334.1	48857.7	45226.5	30687.1	34369.8	24898.6	24785	43373.5	26671.4	27065.9	0.493829	-1.01792	0.00595117
Heliannuol A	C15H22O3	79405.7	77014.7	64615.2	39276.2	49065.4	71669	52334.1	48857.7	45226.5	30687.1	34369.8	24898.6	24785	43373.5	26671.4	27065.9	0.493829	-1.01792	0.00595117
Abscisic alcohol	C15H22O3	79405.7	77014.7	64615.2	39276.2	49065.4	71669	52334.1	48857.7	45226.5	30687.1	34369.8	24898.6	24785	43373.5	26671.4	27065.9	0.493829	-1.01792	0.00595117
(3beta,8beta)-3-Hydroxy-7(11)-eremophilen-12,8-olide	C15H22O3	79405.7	77014.7	64615.2	39276.2	49065.4	71669	52334.1	48857.7	45226.5	30687.1	34369.8	24898.6	24785	43373.5	26671.4	27065.9	0.493829	-1.01792	0.00595117
3beta-Hydroxycinnamolide	C15H22O3	79405.7	77014.7	64615.2	39276.2	49065.4	71669	52334.1	48857.7	45226.5	30687.1	34369.8	24898.6	24785	43373.5	26671.4	27065.9	0.493829	-1.01792	0.00595117
1-Hydroxyacorenone	C15H22O3	79405.7	77014.7	64615.2	39276.2	49065.4	71669	52334.1	48857.7	45226.5	30687.1	34369.8	24898.6	24785	43373.5	26671.4	27065.9	0.493829	-1.01792	0.00595117
Gemfibrozil	C15H22O3	79405.7	77014.7	64615.2	39276.2	49065.4	71669	52334.1	48857.7	45226.5	30687.1	34369.8	24898.6	24785	43373.5	26671.4	27065.9	0.493829	-1.01792	0.00595117
Ethylhexyl salicylate	C15H22O3	79405.7	77014.7	64615.2	39276.2	49065.4	71669	52334.1	48857.7	45226.5	30687.1	34369.8	24898.6	24785	43373.5	26671.4	27065.9	0.493829	-1.01792	0.00595117
Valerenolic acid	C15H22O3	79405.7	77014.7	64615.2	39276.2	49065.4	71669	52334.1	48857.7	45226.5	30687.1	34369.8	24898.6	24785	43373.5	26671.4	27065.9	0.493829	-1.01792	0.00595117
3-Ketoapotrichothecene	C15H22O3	79405.7	77014.7	64615.2	39276.2	49065.4	71669	52334.1	48857.7	45226.5	30687.1	34369.8	24898.6	24785	43373.5	26671.4	27065.9	0.493829	-1.01792	0.00595117
Ketopelenolide a	C15H22O3	79405.7	77014.7	64615.2	39276.2	49065.4	71669	52334.1	48857.7	45226.5	30687.1	34369.8	24898.6	24785	43373.5	26671.4	27065.9	0.493829	-1.01792	0.00595117
3beta-Dihydroxymarasmene	C15H22O3	79405.7	77014.7	64615.2	39276.2	49065.4	71669	52334.1	48857.7	45226.5	30687.1	34369.8	24898.6	24785	43373.5	26671.4	27065.9	0.493829	-1.01792	0.00595117
13-Hydroxymarasmene	C15H22O3	79405.7	77014.7	64615.2	39276.2	49065.4	71669	52334.1	48857.7	45226.5	30687.1	34369.8	24898.6	24785	43373.5	26671.4	27065.9	0.493829	-1.01792	0.00595117
Blennin A	C15H22O3	79405.7	77014.7	64615.2	39276.2	49065.4	71669	52334.1	48857.7	45226.5	30687.1	34369.8	24898.6	24785	43373.5	26671.4	27065.9	0.493829	-1.01792	0.00595117
Cadabicilone	C15H22O3	79405.7	77014.7	64615.2	39276.2	49065.4	71669	52334.1	48857.7	45226.5	30687.1	34369.8	24898.6	24785	43373.5	26671.4	27065.9	0.493829	-1.01792	0.00595117
Lactaronecatorin A	C15H22O3	79405.7	77014.7	64615.2	39276.2	49065.4	71669	52334.1	48857.7	45226.5	30687.1	34369.8	24898.6	24785	43373.5	26671.4	27065.9	0.493829	-1.01792	0.00595117
FS4 toxin	C15H22O3	79405.7	77014.7	64615.2	39276.2	49065.4	71669	52334.1	48857.7	45226.5	30687.1	34369.8	24898.6	24785	43373.5	26671.4	27065.9	0.493829	-1.01792	0.00595117
Pentalenate	C15H22O3	79405.7	77014.7	64615.2	39276.2	49065.4	71669	52334.1	48857.7	45226.5	30687.1	34369.8	24898.6	24785	43373.5	26671.4	27065.9	0.493829	-1.01792	0.00595117
1-Deoxy-11beta-hydroxypentalenate	C15H22O3	79405.7	77014.7	64615.2	39276.2	49065.4	71669	52334.1	48857.7	45226.5	30687.1	34369.8	24898.6	24785	43373.5	26671.4	27065.9	0.493829	-1.01792	0.00595117
Ipomeamarone	C15H22O3	79405.7	77014.7	64615.2	39276.2	49065.4	71669	52334.1	48857.7	45226.5	30687.1	34369.8	24898.6	24785	43373.5	26671.4	27065.9	0.493829	-1.01792	0.00595117
Piperdial	C15H22O3	79405.7	77014.7	64615.2	39276.2	49065.4	71669	52334.1	48857.7	45226.5	30687.1	34369.8	24898.6	24785	43373.5	26671.4	27065.9	0.493829	-1.01792	0.00595117
Warburganal	C15H22O3	79405.7	77014.7	64615.2	39276.2	49065.4	71669	52334.1	48857.7	45226.5	30687.1	34369.8	24898.6	24785	43373.5	26671.4	27065.9	0.493829	-1.01792	0.00595117
Arbusculin A	C15H22O3	79405.7	77014.7	64615.2	39276.2	49065.4	71669	52334.1	48857.7	45226.5	30687.1	34369.8	24898.6	24785	43373.5	26671.4	27065.9	0.493829	-1.01792	0.00595117
2-Ethylhexyl-4-hydroxybenzoate	C15H22O3	79405.7	77014.7	64615.2	39276.2	49065.4	71669	52334.1	48857.7	45226.5	30687.1	34369.8	24898.6	24785	43373.5	26671.4	27065.9	0.493829	-1.01792	0.00595117
Abscisic alcohol	C15H22O3	79405.7	77014.7	64615.2	39276.2	49065.4	71669	52334.1	48857.7	45226.5	30687.1	34369.8	24898.6	24785	43373.5	26671.4	27065.9	0.493829	-1.01792	0.00595117
Xanthoxin	C15H22O3	79405.7	77014.7	64615.2	39276.2	49065.4	71669	52334.1	48857.7	45226.5	30687.1	34369.8	24898.6	24785	43373.5	26671.4	27065.9	0.493829	-1.01792	0.00595117
Ngaione (-)	C15H22O3	79405.7	77014.7	64615.2	39276.2	49065.4	71669	52334.1	48857.7	45226.5	30687.1	34369.8	24898.6	24785	43373.5	26671.4	27065.9	0.493829	-1.01792	0.00595117
(+)-Armillarin	C15H22O3	79405.7	77014.7	64615.2	39276.2	49065.4	71669	52334.1	48857.7	45226.5	30687.1	34369.8	24898.6	24785	43373.5	26671.4	27065.9	0.493829	-1.01792	0.00595117
Valyl-Valine	C10H20N2O3	59054.8	52482.6	75079.7	54767	37733.9	51239.6	38450.2	54876.9	24390.2	26019.6	22030.5	23658.1	37628.2	34750	25749.7	29327.3	0.482699	-1.0508	0.00317023
3R-aminononanoic acid	C9H19NO2	35369.1	39603.2	49948.5	37573.9	21148.1	41599.8	38362.7	26459.4	17526.1	11405.3	23745.1	16136	30991.8	27242.7	18658.7	10830.1	0.476512	-1.06941	0.00869868
9-amino-nonanoic acid	C9H19NO2	35369.1	39603.2	49948.5	37573.9	21148.1	41599.8	38362.7	26459.4	17526.1	11405.3	23745.1	16136	30991.8	27242.7	18658.7	10830.1	0.476512	-1.06941	0.00869868
2-decylenic acid	C10H18O2	403094	487353	495635	440662	329030	444513	463203	477301	125509	173980	161805	126286	154237	207961	131391	130946	0.314667	-1.6681	4.0185e-06
3-Methyl-2,4-nonanedione	C10H18O2	403094	487353	495635	440662	329030	444513	463203	477301	125509	173980	161805	126286	154237	207961	131391	130946	0.314667	-1.6681	4.0185e-06
Cyclohexyl butanoate	C10H18O2	403094	487353	495635	440662	329030	444513	463203	477301	125509	173980	161805	126286	154237	207961	131391	130946	0.314667	-1.6681	4.0185e-06
(E)-2-Hexenyl butyrate	C10H18O2	403094	487353	495635	440662	329030	444513	463203	477301	125509	173980	161805	126286	154237	207961	131391	130946	0.314667	-1.6681	4.0185e-06
9-Hydroxygeraniol	C10H18O2	403094	487353	495635	440662	329030	444513	463203	477301	125509	173980	161805	126286	154237	207961	131391	130946	0.314667	-1.6681	4.0185e-06
4Z-decenoic acid	C10H18O2	403094	487353	495635	440662	329030	444513	463203	477301	125509	173980	161805	126286	154237	207961	131391	130946	0.314667	-1.6681	4.0185e-06
9-Decenoic acid	C10H18O2	403094	487353	495635	440662	329030	444513	463203	477301	125509	173980	161805	126286	154237	207961	131391	130946	0.314667	-1.6681	4.0185e-06
3Z-decenoic acid	C10H18O2	403094	487353	495635	440662	329030	444513	463203	477301	125509	173980	161805	126286	154237	207961	131391	130946	0.314667	-1.6681	4.0185e-06
6-endo-hydroxycineole	C10H18O2	403094	487353	495635	440662	329030	444513	463203	477301	125509	173980	161805	126286	154237	207961	131391	130946	0.314667	-1.6681	4.0185e-06
Linalyl oxide	C10H18O2	403094	487353	495635	440662	329030	444513	463203	477301	125509	173980	161805	126286	154237	207961	131391	130946	0.314667	-1.6681	4.0185e-06
(E)-3-(Tetrahydro-5,5-dimethyl-2-furanyl)-2-buten-1-ol	C10H18O2	403094	487353	495635	440662	329030	444513	463203	477301	125509	173980	161805	126286	154237	207961	131391	130946	0.314667	-1.6681	4.0185e-06
Citronellic acid	C10H18O2	403094	487353	495635	440662	329030	444513	463203	477301	125509	173980	161805	126286	154237	207961	131391	130946	0.314667	-1.6681	4.0185e-06
2-exo-Hydroxy-1,8-cineole	C10H18O2	403094	487353	495635	440662	329030	444513	463203	477301	125509	173980	161805	126286	154237	207961	131391	130946	0.314667	-1.6681	4.0185e-06
(S,E)-2,6-Dimethyl-5,7-octadiene-2,3-diol	C10H18O2	403094	487353	495635	440662	329030	444513	463203	477301	125509	173980	161805	126286	154237	207961	131391	130946	0.314667	-1.6681	4.0185e-06
Cnidiol C	C10H18O2	403094	487353	495635	440662	329030	444513	463203	477301	125509	173980	161805	126286	154237	207961	131391	130946	0.314667	-1.6681	4.0185e-06
Isopentyl 3-methyl-2-butenoate	C10H18O2	403094	487353	495635	440662	329030	444513	463203	477301	125509	173980	161805	126286	154237	207961	131391	130946	0.314667	-1.6681	4.0185e-06
5-Decenoic acid	C10H18O2	403094	487353	495635	440662	329030	444513	463203	477301	125509	173980	161805	126286	154237	207961	131391	130946	0.314667	-1.6681	4.0185e-06
(±)-cis-Linalyl oxide	C10H18O2	403094	487353	495635	440662	329030	444513	463203	477301	125509	173980	161805	126286	154237	207961	131391	130946	0.314667	-1.6681	4.0185e-06
(±)-trans-Linalyl oxide	C10H18O2	403094	487353	495635	440662	329030	444513	463203	477301	125509	173980	161805	126286	154237	207961	131391	130946	0.314667	-1.6681	4.0185e-06
Ethyl 4Z-octenoate	C10H18O2	403094	487353	495635	440662	329030	444513	463203	477301	125509	173980	161805	126286	154237	207961	131391	130946	0.314667	-1.6681	4.0185e-06
(+)-6-Hydroxy-2,6-dimethyl-7-octen-4-one	C10H18O2	403094	487353	495635	440662	329030	444513	463203	477301	125509	173980	161805	126286	154237	207961	131391	130946	0.314667	-1.6681	4.0185e-06
Methyl (xi)-3-nonenoate	C10H18O2	403094	487353	495635	440662	329030	444513	463203	477301	125509	173980	161805	126286	154237	207961	131391	130946	0.314667	-1.6681	4.0185e-06
3Z-Hexenyl isobutyrate	C10H18O2	403094	487353	495635	440662	329030	444513	463203	477301	125509	173980	161805	126286	154237	207961	131391	130946	0.314667	-1.6681	4.0185e-06
2-Propenyl heptanoate	C10H18O2	403094	487353	495635	440662	329030	444513	463203	477301	125509	173980	161805	126286	154237	207961	131391	130946	0.314667	-1.6681	4.0185e-06
Methyl 2-nonenoate	C10H18O2	403094	487353	495635	440662	329030	444513	463203	477301	125509	173980	161805	126286	154237	207961	131391	130946	0.314667	-1.6681	4.0185e-06
Menthone lactone	C10H18O2	403094	487353	495635	440662	329030	444513	463203	477301	125509	173980	161805	126286	154237	207961	131391	130946	0.314667	-1.6681	4.0185e-06
5Z-Octenyl acetate	C10H18O2	403094	487353	495635	440662	329030	444513	463203	477301	125509	173980	161805	126286	154237	207961	131391	130946	0.314667	-1.6681	4.0185e-06
(±)-6-Methyl-5-hepten-2-yl acetate	C10H18O2	403094	487353	495635	440662	329030	444513	463203	477301	125509	173980	161805	126286	154237	207961	131391	130946	0.314667	-1.6681	4.0185e-06
4-Hydroxy-2,6-dimethyl-7-octen-3-one	C10H18O2	403094	487353	495635	440662	329030	444513	463203	477301	125509	173980	161805	126286	154237	207961	131391	130946	0.314667	-1.6681	4.0185e-06
ethyl 3E-octenoate	C10H18O2	403094	487353	495635	440662	329030	444513	463203	477301	125509	173980	161805	126286	154237	207961	131391	130946	0.314667	-1.6681	4.0185e-06
2-Methylbutyl 3-methyl-2-butenoate	C10H18O2	403094	487353	495635	440662	329030	444513	463203	477301	125509	173980	161805	126286	154237	207961	131391	130946	0.314667	-1.6681	4.0185e-06
2,6-Dimethyl-3,7-octadiene-2,6-diol	C10H18O2	403094	487353	495635	440662	329030	444513	463203	477301	125509	173980	161805	126286	154237	207961	131391	130946	0.314667	-1.6681	4.0185e-06
1-Cyclopropyl-4-methyl-1,3-cyclohexanediol	C10H18O2	403094	487353	495635	440662	329030	444513	463203	477301	125509	173980	161805	126286	154237	207961	131391	130946	0.314667	-1.6681	4.0185e-06
Lilac alcohol	C10H18O2	403094	487353	495635	440662	329030	444513	463203	477301	125509	173980	161805	126286	154237	207961	131391	130946	0.314667	-1.6681	4.0185e-06
8-Methylnonenoate	C10H18O2	403094	487353	495635	440662	329030	444513	463203	477301	125509	173980	161805	126286	154237	207961	131391	130946	0.314667	-1.6681	4.0185e-06
Hexyl crotonate	C10H18O2	403094	487353	495635	440662	329030	444513	463203	477301	125509	173980	161805	126286	154237	207961	131391	130946	0.314667	-1.6681	4.0185e-06
Linalool oxide III	C10H18O2	403094	487353	495635	440662	329030	444513	463203	477301	125509	173980	161805	126286	154237	207961	131391	130946	0.314667	-1.6681	4.0185e-06
6-Decenoic acid	C10H18O2	403094	487353	495635	440662	329030	444513	463203	477301	125509	173980	161805	126286	154237	207961	131391	130946	0.314667	-1.6681	4.0185e-06
2-Octenyl acetate	C10H18O2	403094	487353	495635	440662	329030	444513	463203	477301	125509	173980	161805	126286	154237	207961	131391	130946	0.314667	-1.6681	4.0185e-06
Cyclohexylethyl acetate	C10H18O2	403094	487353	495635	440662	329030	444513	463203	477301	125509	173980	161805	126286	154237	207961	131391	130946	0.314667	-1.6681	4.0185e-06
Linalool oxide (trans-pyranoid)	C10H18O2	403094	487353	495635	440662	329030	444513	463203	477301	125509	173980	161805	126286	154237	207961	131391	130946	0.314667	-1.6681	4.0185e-06
3Z-Hexenyl butyrate	C10H18O2	403094	487353	495635	440662	329030	444513	463203	477301	125509	173980	161805	126286	154237	207961	131391	130946	0.314667	-1.6681	4.0185e-06
6-Decanolide	C10H18O2	403094	487353	495635	440662	329030	444513	463203	477301	125509	173980	161805	126286	154237	207961	131391	130946	0.314667	-1.6681	4.0185e-06
Ethyl (E)-2-octenoate	C10H18O2	403094	487353	495635	440662	329030	444513	463203	477301	125509	173980	161805	126286	154237	207961	131391	130946	0.314667	-1.6681	4.0185e-06
xi-Tetrahydro-3-pentyl-2H-pyran-2-one	C10H18O2	403094	487353	495635	440662	329030	444513	463203	477301	125509	173980	161805	126286	154237	207961	131391	130946	0.314667	-1.6681	4.0185e-06
trans-p-Menth-2-ene-1,4-diol	C10H18O2	403094	487353	495635	440662	329030	444513	463203	477301	125509	173980	161805	126286	154237	207961	131391	130946	0.314667	-1.6681	4.0185e-06
Delta-decalactone	C10H18O2	403094	487353	495635	440662	329030	444513	463203	477301	125509	173980	161805	126286	154237	207961	131391	130946	0.314667	-1.6681	4.0185e-06
xi-5-Hexyldihydro-2(3H)-furanone	C10H18O2	403094	487353	495635	440662	329030	444513	463203	477301	125509	173980	161805	126286	154237	207961	131391	130946	0.314667	-1.6681	4.0185e-06
1-Octen-3-yl acetate	C10H18O2	403094	487353	495635	440662	329030	444513	463203	477301	125509	173980	161805	126286	154237	207961	131391	130946	0.314667	-1.6681	4.0185e-06
p-Menth-8-ene-1,2-diol	C10H18O2	403094	487353	495635	440662	329030	444513	463203	477301	125509	173980	161805	126286	154237	207961	131391	130946	0.314667	-1.6681	4.0185e-06
(4R,7S)-7-isopropyl-4-methyloxepan-2-one	C10H18O2	403094	487353	495635	440662	329030	444513	463203	477301	125509	173980	161805	126286	154237	207961	131391	130946	0.314667	-1.6681	4.0185e-06
(1R,2R,4S)-Limonene-1,2-diol	C10H18O2	403094	487353	495635	440662	329030	444513	463203	477301	125509	173980	161805	126286	154237	207961	131391	130946	0.314667	-1.6681	4.0185e-06
Limonene-1,2-diol	C10H18O2	403094	487353	495635	440662	329030	444513	463203	477301	125509	173980	161805	126286	154237	207961	131391	130946	0.314667	-1.6681	4.0185e-06
(+)-Neomatatabiol	C10H18O2	403094	487353	495635	440662	329030	444513	463203	477301	125509	173980	161805	126286	154237	207961	131391	130946	0.314667	-1.6681	4.0185e-06
6-endo-Hydroxycineole	C10H18O2	403094	487353	495635	440662	329030	444513	463203	477301	125509	173980	161805	126286	154237	207961	131391	130946	0.314667	-1.6681	4.0185e-06
2,6-dimethyl-2E,7-octadiene-1,6-diol	C10H18O2	403094	487353	495635	440662	329030	444513	463203	477301	125509	173980	161805	126286	154237	207961	131391	130946	0.314667	-1.6681	4.0185e-06
(6E)-8-Hydroxygeraniol	C10H18O2	403094	487353	495635	440662	329030	444513	463203	477301	125509	173980	161805	126286	154237	207961	131391	130946	0.314667	-1.6681	4.0185e-06
2E-Octenyl acetate	C10H18O2	403094	487353	495635	440662	329030	444513	463203	477301	125509	173980	161805	126286	154237	207961	131391	130946	0.314667	-1.6681	4.0185e-06
3Z-Octenyl acetate	C10H18O2	403094	487353	495635	440662	329030	444513	463203	477301	125509	173980	161805	126286	154237	207961	131391	130946	0.314667	-1.6681	4.0185e-06
formyl 6E-nonenoate	C10H18O2	403094	487353	495635	440662	329030	444513	463203	477301	125509	173980	161805	126286	154237	207961	131391	130946	0.314667	-1.6681	4.0185e-06
ethyl 4Z-octenoate	C10H18O2	403094	487353	495635	440662	329030	444513	463203	477301	125509	173980	161805	126286	154237	207961	131391	130946	0.314667	-1.6681	4.0185e-06
1,7-Dioxaspiro[5.6]dodecane	C10H18O2	403094	487353	495635	440662	329030	444513	463203	477301	125509	173980	161805	126286	154237	207961	131391	130946	0.314667	-1.6681	4.0185e-06
2-Methyl-1,7-dioxaspiro[5.5]undecane	C10H18O2	403094	487353	495635	440662	329030	444513	463203	477301	125509	173980	161805	126286	154237	207961	131391	130946	0.314667	-1.6681	4.0185e-06
(4R,7R)-7-isopropyl-4-methyloxepan-2-one	C10H18O2	403094	487353	495635	440662	329030	444513	463203	477301	125509	173980	161805	126286	154237	207961	131391	130946	0.314667	-1.6681	4.0185e-06
10-Methyloxecan-2-one	C10H18O2	403094	487353	495635	440662	329030	444513	463203	477301	125509	173980	161805	126286	154237	207961	131391	130946	0.314667	-1.6681	4.0185e-06
(R)-gamma-Decalactone	C10H18O2	403094	487353	495635	440662	329030	444513	463203	477301	125509	173980	161805	126286	154237	207961	131391	130946	0.314667	-1.6681	4.0185e-06
2,3-Decanedione	C10H18O2	403094	487353	495635	440662	329030	444513	463203	477301	125509	173980	161805	126286	154237	207961	131391	130946	0.314667	-1.6681	4.0185e-06
cis-dec-2-enoic acid	C10H18O2	403094	487353	495635	440662	329030	444513	463203	477301	125509	173980	161805	126286	154237	207961	131391	130946	0.314667	-1.6681	4.0185e-06
Isodecenoic acid	C10H18O2	403094	487353	495635	440662	329030	444513	463203	477301	125509	173980	161805	126286	154237	207961	131391	130946	0.314667	-1.6681	4.0185e-06
Obtusilic acid	C10H18O2	403094	487353	495635	440662	329030	444513	463203	477301	125509	173980	161805	126286	154237	207961	131391	130946	0.314667	-1.6681	4.0185e-06
3-decylenic acid	C10H18O2	403094	487353	495635	440662	329030	444513	463203	477301	125509	173980	161805	126286	154237	207961	131391	130946	0.314667	-1.6681	4.0185e-06
3,7-dimethyl-2-octenoic acid	C10H18O2	403094	487353	495635	440662	329030	444513	463203	477301	125509	173980	161805	126286	154237	207961	131391	130946	0.314667	-1.6681	4.0185e-06
2,7-dimethyl-6-octenoic acid	C10H18O2	403094	487353	495635	440662	329030	444513	463203	477301	125509	173980	161805	126286	154237	207961	131391	130946	0.314667	-1.6681	4.0185e-06
3-methyl-2-nonenoic acid	C10H18O2	403094	487353	495635	440662	329030	444513	463203	477301	125509	173980	161805	126286	154237	207961	131391	130946	0.314667	-1.6681	4.0185e-06
D(-)-beta-hydroxy butyric acid	C4H8O3	954894	1.221e+06	1.22456e+06	1.01754e+06	474237	887834	780612	698448	67807.4	0	139053	325271	130674	298684	69428.6	0	0.108591	-3.20303	0.00665483
4-Methylnonanoic acid	C10H20O2	9949007	11504798	11419062	9327990	7611035	10557322	12258934	11924596	3.51156e+06	5.40678e+06	3.36879e+06	2.54327e+06	3.71239e+06	5.53706e+06	3.01635e+06	2.83467e+06	0.313079	-1.6754	5.81461e-06
Propyl heptanoate	C10H20O2	9949007	11504798	11419062	9327990	7611035	10557322	12258934	11924596	3.51156e+06	5.40678e+06	3.36879e+06	2.54327e+06	3.71239e+06	5.53706e+06	3.01635e+06	2.83467e+06	0.313079	-1.6754	5.81461e-06
Capric acid	C10H20O2	9949007	11504798	11419062	9327990	7611035	10557322	12258934	11924596	3.51156e+06	5.40678e+06	3.36879e+06	2.54327e+06	3.71239e+06	5.53706e+06	3.01635e+06	2.83467e+06	0.313079	-1.6754	5.81461e-06
Octyl acetate	C10H20O2	9949007	11504798	11419062	9327990	7611035	10557322	12258934	11924596	3.51156e+06	5.40678e+06	3.36879e+06	2.54327e+06	3.71239e+06	5.53706e+06	3.01635e+06	2.83467e+06	0.313079	-1.6754	5.81461e-06
(Z)-1-(1-Ethoxyethoxy)-3-hexene	C10H20O2	9949007	11504798	11419062	9327990	7611035	10557322	12258934	11924596	3.51156e+06	5.40678e+06	3.36879e+06	2.54327e+06	3.71239e+06	5.53706e+06	3.01635e+06	2.83467e+06	0.313079	-1.6754	5.81461e-06
2-Methylbutyl 3-methylbutanoate	C10H20O2	9949007	11504798	11419062	9327990	7611035	10557322	12258934	11924596	3.51156e+06	5.40678e+06	3.36879e+06	2.54327e+06	3.71239e+06	5.53706e+06	3.01635e+06	2.83467e+06	0.313079	-1.6754	5.81461e-06
trans-p-Menthane-1,8-diol	C10H20O2	9949007	11504798	11419062	9327990	7611035	10557322	12258934	11924596	3.51156e+06	5.40678e+06	3.36879e+06	2.54327e+06	3.71239e+06	5.53706e+06	3.01635e+06	2.83467e+06	0.313079	-1.6754	5.81461e-06
(1R,2S,3S,4R)-p-Menthane-2,3-diol	C10H20O2	9949007	11504798	11419062	9327990	7611035	10557322	12258934	11924596	3.51156e+06	5.40678e+06	3.36879e+06	2.54327e+06	3.71239e+06	5.53706e+06	3.01635e+06	2.83467e+06	0.313079	-1.6754	5.81461e-06
3-Methylbutyl pentanoate	C10H20O2	9949007	11504798	11419062	9327990	7611035	10557322	12258934	11924596	3.51156e+06	5.40678e+06	3.36879e+06	2.54327e+06	3.71239e+06	5.53706e+06	3.01635e+06	2.83467e+06	0.313079	-1.6754	5.81461e-06
1,1-Diethoxy-2-hexene	C10H20O2	9949007	11504798	11419062	9327990	7611035	10557322	12258934	11924596	3.51156e+06	5.40678e+06	3.36879e+06	2.54327e+06	3.71239e+06	5.53706e+06	3.01635e+06	2.83467e+06	0.313079	-1.6754	5.81461e-06
butyl hexanoate	C10H20O2	9949007	11504798	11419062	9327990	7611035	10557322	12258934	11924596	3.51156e+06	5.40678e+06	3.36879e+06	2.54327e+06	3.71239e+06	5.53706e+06	3.01635e+06	2.83467e+06	0.313079	-1.6754	5.81461e-06
2-Methylbutyl 2-methylbutanoate	C10H20O2	9949007	11504798	11419062	9327990	7611035	10557322	12258934	11924596	3.51156e+06	5.40678e+06	3.36879e+06	2.54327e+06	3.71239e+06	5.53706e+06	3.01635e+06	2.83467e+06	0.313079	-1.6754	5.81461e-06
Ethyl octanoate	C10H20O2	9949007	11504798	11419062	9327990	7611035	10557322	12258934	11924596	3.51156e+06	5.40678e+06	3.36879e+06	2.54327e+06	3.71239e+06	5.53706e+06	3.01635e+06	2.83467e+06	0.313079	-1.6754	5.81461e-06
3-Methylbutyl 2-methylbutanoate	C10H20O2	9949007	11504798	11419062	9327990	7611035	10557322	12258934	11924596	3.51156e+06	5.40678e+06	3.36879e+06	2.54327e+06	3.71239e+06	5.53706e+06	3.01635e+06	2.83467e+06	0.313079	-1.6754	5.81461e-06
(±)-3-Octyl acetate	C10H20O2	9949007	11504798	11419062	9327990	7611035	10557322	12258934	11924596	3.51156e+06	5.40678e+06	3.36879e+06	2.54327e+06	3.71239e+06	5.53706e+06	3.01635e+06	2.83467e+06	0.313079	-1.6754	5.81461e-06
Isoamyl isovalerate	C10H20O2	9949007	11504798	11419062	9327990	7611035	10557322	12258934	11924596	3.51156e+06	5.40678e+06	3.36879e+06	2.54327e+06	3.71239e+06	5.53706e+06	3.01635e+06	2.83467e+06	0.313079	-1.6754	5.81461e-06
Pentyl 3-methylbutanoate	C10H20O2	9949007	11504798	11419062	9327990	7611035	10557322	12258934	11924596	3.51156e+06	5.40678e+06	3.36879e+06	2.54327e+06	3.71239e+06	5.53706e+06	3.01635e+06	2.83467e+06	0.313079	-1.6754	5.81461e-06
Isooctyl acetate	C10H20O2	9949007	11504798	11419062	9327990	7611035	10557322	12258934	11924596	3.51156e+06	5.40678e+06	3.36879e+06	2.54327e+06	3.71239e+06	5.53706e+06	3.01635e+06	2.83467e+06	0.313079	-1.6754	5.81461e-06
Acetaldehyde 1,3-octanediol acetal	C10H20O2	9949007	11504798	11419062	9327990	7611035	10557322	12258934	11924596	3.51156e+06	5.40678e+06	3.36879e+06	2.54327e+06	3.71239e+06	5.53706e+06	3.01635e+06	2.83467e+06	0.313079	-1.6754	5.81461e-06
Ethyl 2-ethylhexanoate	C10H20O2	9949007	11504798	11419062	9327990	7611035	10557322	12258934	11924596	3.51156e+06	5.40678e+06	3.36879e+06	2.54327e+06	3.71239e+06	5.53706e+06	3.01635e+06	2.83467e+06	0.313079	-1.6754	5.81461e-06
Hexanal butane-2,3-diol acetal	C10H20O2	9949007	11504798	11419062	9327990	7611035	10557322	12258934	11924596	3.51156e+06	5.40678e+06	3.36879e+06	2.54327e+06	3.71239e+06	5.53706e+06	3.01635e+06	2.83467e+06	0.313079	-1.6754	5.81461e-06
Heptanal propyleneglycol acetal	C10H20O2	9949007	11504798	11419062	9327990	7611035	10557322	12258934	11924596	3.51156e+06	5.40678e+06	3.36879e+06	2.54327e+06	3.71239e+06	5.53706e+06	3.01635e+06	2.83467e+06	0.313079	-1.6754	5.81461e-06
(2S)-2-Ethylhexyl acetate	C10H20O2	9949007	11504798	11419062	9327990	7611035	10557322	12258934	11924596	3.51156e+06	5.40678e+06	3.36879e+06	2.54327e+06	3.71239e+06	5.53706e+06	3.01635e+06	2.83467e+06	0.313079	-1.6754	5.81461e-06
4-Ethyloctanoic acid	C10H20O2	9949007	11504798	11419062	9327990	7611035	10557322	12258934	11924596	3.51156e+06	5.40678e+06	3.36879e+06	2.54327e+06	3.71239e+06	5.53706e+06	3.01635e+06	2.83467e+06	0.313079	-1.6754	5.81461e-06
p-Menthane-3,8-diol	C10H20O2	9949007	11504798	11419062	9327990	7611035	10557322	12258934	11924596	3.51156e+06	5.40678e+06	3.36879e+06	2.54327e+06	3.71239e+06	5.53706e+06	3.01635e+06	2.83467e+06	0.313079	-1.6754	5.81461e-06
2-Methylpropyl hexanoate	C10H20O2	9949007	11504798	11419062	9327990	7611035	10557322	12258934	11924596	3.51156e+06	5.40678e+06	3.36879e+06	2.54327e+06	3.71239e+06	5.53706e+06	3.01635e+06	2.83467e+06	0.313079	-1.6754	5.81461e-06
7-Hydroxy-3,7-dimethyloctanal	C10H20O2	9949007	11504798	11419062	9327990	7611035	10557322	12258934	11924596	3.51156e+06	5.40678e+06	3.36879e+06	2.54327e+06	3.71239e+06	5.53706e+06	3.01635e+06	2.83467e+06	0.313079	-1.6754	5.81461e-06
2,6-Dimethyl-7-octene-2,6-diol	C10H20O2	9949007	11504798	11419062	9327990	7611035	10557322	12258934	11924596	3.51156e+06	5.40678e+06	3.36879e+06	2.54327e+06	3.71239e+06	5.53706e+06	3.01635e+06	2.83467e+06	0.313079	-1.6754	5.81461e-06
Methyl nonanoate	C10H20O2	9949007	11504798	11419062	9327990	7611035	10557322	12258934	11924596	3.51156e+06	5.40678e+06	3.36879e+06	2.54327e+06	3.71239e+06	5.53706e+06	3.01635e+06	2.83467e+06	0.313079	-1.6754	5.81461e-06
hexyl butyrate	C10H20O2	9949007	11504798	11419062	9327990	7611035	10557322	12258934	11924596	3.51156e+06	5.40678e+06	3.36879e+06	2.54327e+06	3.71239e+06	5.53706e+06	3.01635e+06	2.83467e+06	0.313079	-1.6754	5.81461e-06
Hexyl 2-methylpropanoate	C10H20O2	9949007	11504798	11419062	9327990	7611035	10557322	12258934	11924596	3.51156e+06	5.40678e+06	3.36879e+06	2.54327e+06	3.71239e+06	5.53706e+06	3.01635e+06	2.83467e+06	0.313079	-1.6754	5.81461e-06
(1S,3R,4R)-p-Menthane-1,3-diol	C10H20O2	9949007	11504798	11419062	9327990	7611035	10557322	12258934	11924596	3.51156e+06	5.40678e+06	3.36879e+06	2.54327e+06	3.71239e+06	5.53706e+06	3.01635e+06	2.83467e+06	0.313079	-1.6754	5.81461e-06
1beta,3beta,4alpha-p-menthane-3,8-diol	C10H20O2	9949007	11504798	11419062	9327990	7611035	10557322	12258934	11924596	3.51156e+06	5.40678e+06	3.36879e+06	2.54327e+06	3.71239e+06	5.53706e+06	3.01635e+06	2.83467e+06	0.313079	-1.6754	5.81461e-06
2-methyl nonaoic acid	C10H20O2	9949007	11504798	11419062	9327990	7611035	10557322	12258934	11924596	3.51156e+06	5.40678e+06	3.36879e+06	2.54327e+06	3.71239e+06	5.53706e+06	3.01635e+06	2.83467e+06	0.313079	-1.6754	5.81461e-06
2-Pentyl 3-methylbutanoate	C10H20O2	9949007	11504798	11419062	9327990	7611035	10557322	12258934	11924596	3.51156e+06	5.40678e+06	3.36879e+06	2.54327e+06	3.71239e+06	5.53706e+06	3.01635e+06	2.83467e+06	0.313079	-1.6754	5.81461e-06
formyl 4-methyl-octanoate	C10H20O2	9949007	11504798	11419062	9327990	7611035	10557322	12258934	11924596	3.51156e+06	5.40678e+06	3.36879e+06	2.54327e+06	3.71239e+06	5.53706e+06	3.01635e+06	2.83467e+06	0.313079	-1.6754	5.81461e-06
ethyl 4-methyl-heptanoate	C10H20O2	9949007	11504798	11419062	9327990	7611035	10557322	12258934	11924596	3.51156e+06	5.40678e+06	3.36879e+06	2.54327e+06	3.71239e+06	5.53706e+06	3.01635e+06	2.83467e+06	0.313079	-1.6754	5.81461e-06
1beta,3beta,4beta-p-menthane-3,8-diol	C10H20O2	9949007	11504798	11419062	9327990	7611035	10557322	12258934	11924596	3.51156e+06	5.40678e+06	3.36879e+06	2.54327e+06	3.71239e+06	5.53706e+06	3.01635e+06	2.83467e+06	0.313079	-1.6754	5.81461e-06
1beta,3alpha,4beta-p-menthane-3,8-diol	C10H20O2	9949007	11504798	11419062	9327990	7611035	10557322	12258934	11924596	3.51156e+06	5.40678e+06	3.36879e+06	2.54327e+06	3.71239e+06	5.53706e+06	3.01635e+06	2.83467e+06	0.313079	-1.6754	5.81461e-06
1alpha,3beta,4beta-p-menthane-3,8-diol	C10H20O2	9949007	11504798	11419062	9327990	7611035	10557322	12258934	11924596	3.51156e+06	5.40678e+06	3.36879e+06	2.54327e+06	3.71239e+06	5.53706e+06	3.01635e+06	2.83467e+06	0.313079	-1.6754	5.81461e-06
1beta,3alpha,4alpha-p-menthane-3,8-diol	C10H20O2	9949007	11504798	11419062	9327990	7611035	10557322	12258934	11924596	3.51156e+06	5.40678e+06	3.36879e+06	2.54327e+06	3.71239e+06	5.53706e+06	3.01635e+06	2.83467e+06	0.313079	-1.6754	5.81461e-06
1alpha,3alpha,4beta-p-menthane-3,8-diol	C10H20O2	9949007	11504798	11419062	9327990	7611035	10557322	12258934	11924596	3.51156e+06	5.40678e+06	3.36879e+06	2.54327e+06	3.71239e+06	5.53706e+06	3.01635e+06	2.83467e+06	0.313079	-1.6754	5.81461e-06
2-Hydroxydecan-3-one	C10H20O2	9949007	11504798	11419062	9327990	7611035	10557322	12258934	11924596	3.51156e+06	5.40678e+06	3.36879e+06	2.54327e+06	3.71239e+06	5.53706e+06	3.01635e+06	2.83467e+06	0.313079	-1.6754	5.81461e-06
3-Hydroxydecan-2-one	C10H20O2	9949007	11504798	11419062	9327990	7611035	10557322	12258934	11924596	3.51156e+06	5.40678e+06	3.36879e+06	2.54327e+06	3.71239e+06	5.53706e+06	3.01635e+06	2.83467e+06	0.313079	-1.6754	5.81461e-06
2S-Hydroxydecan-3-one	C10H20O2	9949007	11504798	11419062	9327990	7611035	10557322	12258934	11924596	3.51156e+06	5.40678e+06	3.36879e+06	2.54327e+06	3.71239e+06	5.53706e+06	3.01635e+06	2.83467e+06	0.313079	-1.6754	5.81461e-06
3-methyl-nonanoic acid	C10H20O2	9949007	11504798	11419062	9327990	7611035	10557322	12258934	11924596	3.51156e+06	5.40678e+06	3.36879e+06	2.54327e+06	3.71239e+06	5.53706e+06	3.01635e+06	2.83467e+06	0.313079	-1.6754	5.81461e-06
8-methyl-nonanoic acid	C10H20O2	9949007	11504798	11419062	9327990	7611035	10557322	12258934	11924596	3.51156e+06	5.40678e+06	3.36879e+06	2.54327e+06	3.71239e+06	5.53706e+06	3.01635e+06	2.83467e+06	0.313079	-1.6754	5.81461e-06
7-methyl-nonanoic acid	C10H20O2	9949007	11504798	11419062	9327990	7611035	10557322	12258934	11924596	3.51156e+06	5.40678e+06	3.36879e+06	2.54327e+06	3.71239e+06	5.53706e+06	3.01635e+06	2.83467e+06	0.313079	-1.6754	5.81461e-06
Cyclohexyl 3-methylbutanoate	C11H20O2	309034	320740	293821	269294	217104	283689	311343	362226	74478.3	86984.4	87988.8	61451.4	63170	86007.9	65822.3	57758.6	0.232727	-2.10329	8.01363e-06
Cyclohexyl pentanoate	C11H20O2	309034	320740	293821	269294	217104	283689	311343	362226	74478.3	86984.4	87988.8	61451.4	63170	86007.9	65822.3	57758.6	0.232727	-2.10329	8.01363e-06
5-Octenyl propanoate	C11H20O2	309034	320740	293821	269294	217104	283689	311343	362226	74478.3	86984.4	87988.8	61451.4	63170	86007.9	65822.3	57758.6	0.232727	-2.10329	8.01363e-06
cis-3-Hexenyl 2-methylbutanoate	C11H20O2	309034	320740	293821	269294	217104	283689	311343	362226	74478.3	86984.4	87988.8	61451.4	63170	86007.9	65822.3	57758.6	0.232727	-2.10329	8.01363e-06
(Z)-3-Hexenyl 3-methylbutanoate	C11H20O2	309034	320740	293821	269294	217104	283689	311343	362226	74478.3	86984.4	87988.8	61451.4	63170	86007.9	65822.3	57758.6	0.232727	-2.10329	8.01363e-06
2-Hexenyl valerate	C11H20O2	309034	320740	293821	269294	217104	283689	311343	362226	74478.3	86984.4	87988.8	61451.4	63170	86007.9	65822.3	57758.6	0.232727	-2.10329	8.01363e-06
2-Hexenyl isovalerate	C11H20O2	309034	320740	293821	269294	217104	283689	311343	362226	74478.3	86984.4	87988.8	61451.4	63170	86007.9	65822.3	57758.6	0.232727	-2.10329	8.01363e-06
gamma-undecalactone	C11H20O2	309034	320740	293821	269294	217104	283689	311343	362226	74478.3	86984.4	87988.8	61451.4	63170	86007.9	65822.3	57758.6	0.232727	-2.10329	8.01363e-06
trans-2-Hexyl-1-cyclopropaneacetic acid	C11H20O2	309034	320740	293821	269294	217104	283689	311343	362226	74478.3	86984.4	87988.8	61451.4	63170	86007.9	65822.3	57758.6	0.232727	-2.10329	8.01363e-06
(Z)-3-Methyl-4-decenoic acid	C11H20O2	309034	320740	293821	269294	217104	283689	311343	362226	74478.3	86984.4	87988.8	61451.4	63170	86007.9	65822.3	57758.6	0.232727	-2.10329	8.01363e-06
(Z)-3-Methyl-3-decenoic acid	C11H20O2	309034	320740	293821	269294	217104	283689	311343	362226	74478.3	86984.4	87988.8	61451.4	63170	86007.9	65822.3	57758.6	0.232727	-2.10329	8.01363e-06
2-Propenyl octanoate	C11H20O2	309034	320740	293821	269294	217104	283689	311343	362226	74478.3	86984.4	87988.8	61451.4	63170	86007.9	65822.3	57758.6	0.232727	-2.10329	8.01363e-06
3-Hexenyl 2-methylbutyrate	C11H20O2	309034	320740	293821	269294	217104	283689	311343	362226	74478.3	86984.4	87988.8	61451.4	63170	86007.9	65822.3	57758.6	0.232727	-2.10329	8.01363e-06
(E)-3-Heptenyl 2-methylpropanoate	C11H20O2	309034	320740	293821	269294	217104	283689	311343	362226	74478.3	86984.4	87988.8	61451.4	63170	86007.9	65822.3	57758.6	0.232727	-2.10329	8.01363e-06
Methyl 2-decenoate	C11H20O2	309034	320740	293821	269294	217104	283689	311343	362226	74478.3	86984.4	87988.8	61451.4	63170	86007.9	65822.3	57758.6	0.232727	-2.10329	8.01363e-06
6-Hexyltetrahydro-2H-pyran-2-one	C11H20O2	309034	320740	293821	269294	217104	283689	311343	362226	74478.3	86984.4	87988.8	61451.4	63170	86007.9	65822.3	57758.6	0.232727	-2.10329	8.01363e-06
5-Hexyldihydro-5-methyl-2(3H)-furanone	C11H20O2	309034	320740	293821	269294	217104	283689	311343	362226	74478.3	86984.4	87988.8	61451.4	63170	86007.9	65822.3	57758.6	0.232727	-2.10329	8.01363e-06
cis-3-Hexenyl pentanoate	C11H20O2	309034	320740	293821	269294	217104	283689	311343	362226	74478.3	86984.4	87988.8	61451.4	63170	86007.9	65822.3	57758.6	0.232727	-2.10329	8.01363e-06
2,3-Undecanedione	C11H20O2	309034	320740	293821	269294	217104	283689	311343	362226	74478.3	86984.4	87988.8	61451.4	63170	86007.9	65822.3	57758.6	0.232727	-2.10329	8.01363e-06
Ethyl (E)-2-nonenoate	C11H20O2	309034	320740	293821	269294	217104	283689	311343	362226	74478.3	86984.4	87988.8	61451.4	63170	86007.9	65822.3	57758.6	0.232727	-2.10329	8.01363e-06
Ethyl 3-cyclohexylpropionate	C11H20O2	309034	320740	293821	269294	217104	283689	311343	362226	74478.3	86984.4	87988.8	61451.4	63170	86007.9	65822.3	57758.6	0.232727	-2.10329	8.01363e-06
Citronellyl formate	C11H20O2	309034	320740	293821	269294	217104	283689	311343	362226	74478.3	86984.4	87988.8	61451.4	63170	86007.9	65822.3	57758.6	0.232727	-2.10329	8.01363e-06
10-hendecenoic acid	C11H20O2	309034	320740	293821	269294	217104	283689	311343	362226	74478.3	86984.4	87988.8	61451.4	63170	86007.9	65822.3	57758.6	0.232727	-2.10329	8.01363e-06
5-Hexyldihydro-4-methyl-2(3H)-furanone	C11H20O2	309034	320740	293821	269294	217104	283689	311343	362226	74478.3	86984.4	87988.8	61451.4	63170	86007.9	65822.3	57758.6	0.232727	-2.10329	8.01363e-06
(x)-1-Nonen-3-yl acetate	C11H20O2	309034	320740	293821	269294	217104	283689	311343	362226	74478.3	86984.4	87988.8	61451.4	63170	86007.9	65822.3	57758.6	0.232727	-2.10329	8.01363e-06
Rhodinyl formate	C11H20O2	309034	320740	293821	269294	217104	283689	311343	362226	74478.3	86984.4	87988.8	61451.4	63170	86007.9	65822.3	57758.6	0.232727	-2.10329	8.01363e-06
formyl 3,7-dimethyl-6E-octenoate	C11H20O2	309034	320740	293821	269294	217104	283689	311343	362226	74478.3	86984.4	87988.8	61451.4	63170	86007.9	65822.3	57758.6	0.232727	-2.10329	8.01363e-06
cis-3-Octenyl propionate	C11H20O2	309034	320740	293821	269294	217104	283689	311343	362226	74478.3	86984.4	87988.8	61451.4	63170	86007.9	65822.3	57758.6	0.232727	-2.10329	8.01363e-06
Pent-2-enyl hexanoate	C11H20O2	309034	320740	293821	269294	217104	283689	311343	362226	74478.3	86984.4	87988.8	61451.4	63170	86007.9	65822.3	57758.6	0.232727	-2.10329	8.01363e-06
6-Methyl-5-hepten-2-one propyleneglycol acetal	C11H20O2	309034	320740	293821	269294	217104	283689	311343	362226	74478.3	86984.4	87988.8	61451.4	63170	86007.9	65822.3	57758.6	0.232727	-2.10329	8.01363e-06
Prenyl caproate	C11H20O2	309034	320740	293821	269294	217104	283689	311343	362226	74478.3	86984.4	87988.8	61451.4	63170	86007.9	65822.3	57758.6	0.232727	-2.10329	8.01363e-06
trans-2-Hexenyl 2-methylbutyrate	C11H20O2	309034	320740	293821	269294	217104	283689	311343	362226	74478.3	86984.4	87988.8	61451.4	63170	86007.9	65822.3	57758.6	0.232727	-2.10329	8.01363e-06
2-Ethylhexyl acrylate	C11H20O2	309034	320740	293821	269294	217104	283689	311343	362226	74478.3	86984.4	87988.8	61451.4	63170	86007.9	65822.3	57758.6	0.232727	-2.10329	8.01363e-06
gamma-Undecalactone	C11H20O2	309034	320740	293821	269294	217104	283689	311343	362226	74478.3	86984.4	87988.8	61451.4	63170	86007.9	65822.3	57758.6	0.232727	-2.10329	8.01363e-06
11-undecanolactone	C11H20O2	309034	320740	293821	269294	217104	283689	311343	362226	74478.3	86984.4	87988.8	61451.4	63170	86007.9	65822.3	57758.6	0.232727	-2.10329	8.01363e-06
6E-Nonenyl acetate	C11H20O2	309034	320740	293821	269294	217104	283689	311343	362226	74478.3	86984.4	87988.8	61451.4	63170	86007.9	65822.3	57758.6	0.232727	-2.10329	8.01363e-06
2-Nonenyl acetate	C11H20O2	309034	320740	293821	269294	217104	283689	311343	362226	74478.3	86984.4	87988.8	61451.4	63170	86007.9	65822.3	57758.6	0.232727	-2.10329	8.01363e-06
formyl 4Z-decenoate	C11H20O2	309034	320740	293821	269294	217104	283689	311343	362226	74478.3	86984.4	87988.8	61451.4	63170	86007.9	65822.3	57758.6	0.232727	-2.10329	8.01363e-06
(2S,6R,8S)-2,8-Dimethyl-1,7-dioxaspiro[5.5]undecane	C11H20O2	309034	320740	293821	269294	217104	283689	311343	362226	74478.3	86984.4	87988.8	61451.4	63170	86007.9	65822.3	57758.6	0.232727	-2.10329	8.01363e-06
2-Ethyl-7-methyl-1,6-dioxaspiro[4.5]decane	C11H20O2	309034	320740	293821	269294	217104	283689	311343	362226	74478.3	86984.4	87988.8	61451.4	63170	86007.9	65822.3	57758.6	0.232727	-2.10329	8.01363e-06
2-Methyl-1,7-dioxaspiro[5.6]dodecane	C11H20O2	309034	320740	293821	269294	217104	283689	311343	362226	74478.3	86984.4	87988.8	61451.4	63170	86007.9	65822.3	57758.6	0.232727	-2.10329	8.01363e-06
2,7-Diethyl-1,6-dioxaspiro[4.4]nonane	C11H20O2	309034	320740	293821	269294	217104	283689	311343	362226	74478.3	86984.4	87988.8	61451.4	63170	86007.9	65822.3	57758.6	0.232727	-2.10329	8.01363e-06
7-Ethyl-2R-methyl-1,6-dioxaspiro[4.5]decane	C11H20O2	309034	320740	293821	269294	217104	283689	311343	362226	74478.3	86984.4	87988.8	61451.4	63170	86007.9	65822.3	57758.6	0.232727	-2.10329	8.01363e-06
2-Ethyl-1,7-dioxaspiro[5.5]undecane	C11H20O2	309034	320740	293821	269294	217104	283689	311343	362226	74478.3	86984.4	87988.8	61451.4	63170	86007.9	65822.3	57758.6	0.232727	-2.10329	8.01363e-06
2S-Ethyl-7-methyl-1,6-dioxaspiro[4.5]decane	C11H20O2	309034	320740	293821	269294	217104	283689	311343	362226	74478.3	86984.4	87988.8	61451.4	63170	86007.9	65822.3	57758.6	0.232727	-2.10329	8.01363e-06
(2S,6S,8S)-2,8-Dimethyl-1,7-dioxaspiro[5.5]undecane	C11H20O2	309034	320740	293821	269294	217104	283689	311343	362226	74478.3	86984.4	87988.8	61451.4	63170	86007.9	65822.3	57758.6	0.232727	-2.10329	8.01363e-06
2-Methyl-7-propyl-1,6-dioxaspiro[4.4]nonane	C11H20O2	309034	320740	293821	269294	217104	283689	311343	362226	74478.3	86984.4	87988.8	61451.4	63170	86007.9	65822.3	57758.6	0.232727	-2.10329	8.01363e-06
2,7-Dimethyl-1,6-dioxaspiro[4.6]undecane	C11H20O2	309034	320740	293821	269294	217104	283689	311343	362226	74478.3	86984.4	87988.8	61451.4	63170	86007.9	65822.3	57758.6	0.232727	-2.10329	8.01363e-06
7-undecenoic acid	C11H20O2	309034	320740	293821	269294	217104	283689	311343	362226	74478.3	86984.4	87988.8	61451.4	63170	86007.9	65822.3	57758.6	0.232727	-2.10329	8.01363e-06
6-undecenoic acid	C11H20O2	309034	320740	293821	269294	217104	283689	311343	362226	74478.3	86984.4	87988.8	61451.4	63170	86007.9	65822.3	57758.6	0.232727	-2.10329	8.01363e-06
4-undecenoic acid	C11H20O2	309034	320740	293821	269294	217104	283689	311343	362226	74478.3	86984.4	87988.8	61451.4	63170	86007.9	65822.3	57758.6	0.232727	-2.10329	8.01363e-06
5Z-undecenoic acid	C11H20O2	309034	320740	293821	269294	217104	283689	311343	362226	74478.3	86984.4	87988.8	61451.4	63170	86007.9	65822.3	57758.6	0.232727	-2.10329	8.01363e-06
5E-undecenoic acid	C11H20O2	309034	320740	293821	269294	217104	283689	311343	362226	74478.3	86984.4	87988.8	61451.4	63170	86007.9	65822.3	57758.6	0.232727	-2.10329	8.01363e-06
9-hendecenoic acid	C11H20O2	309034	320740	293821	269294	217104	283689	311343	362226	74478.3	86984.4	87988.8	61451.4	63170	86007.9	65822.3	57758.6	0.232727	-2.10329	8.01363e-06
2-hendecenoic acid	C11H20O2	309034	320740	293821	269294	217104	283689	311343	362226	74478.3	86984.4	87988.8	61451.4	63170	86007.9	65822.3	57758.6	0.232727	-2.10329	8.01363e-06
6Z-undecenoic acid	C11H20O2	309034	320740	293821	269294	217104	283689	311343	362226	74478.3	86984.4	87988.8	61451.4	63170	86007.9	65822.3	57758.6	0.232727	-2.10329	8.01363e-06
3E-undecenoic acid	C11H20O2	309034	320740	293821	269294	217104	283689	311343	362226	74478.3	86984.4	87988.8	61451.4	63170	86007.9	65822.3	57758.6	0.232727	-2.10329	8.01363e-06
2Z-undecenoic acid	C11H20O2	309034	320740	293821	269294	217104	283689	311343	362226	74478.3	86984.4	87988.8	61451.4	63170	86007.9	65822.3	57758.6	0.232727	-2.10329	8.01363e-06
9Z-undecenoic acid	C11H20O2	309034	320740	293821	269294	217104	283689	311343	362226	74478.3	86984.4	87988.8	61451.4	63170	86007.9	65822.3	57758.6	0.232727	-2.10329	8.01363e-06
8Z-undecenoic acid	C11H20O2	309034	320740	293821	269294	217104	283689	311343	362226	74478.3	86984.4	87988.8	61451.4	63170	86007.9	65822.3	57758.6	0.232727	-2.10329	8.01363e-06
2,7-dimethyl-6-nonenoic acid	C11H20O2	309034	320740	293821	269294	217104	283689	311343	362226	74478.3	86984.4	87988.8	61451.4	63170	86007.9	65822.3	57758.6	0.232727	-2.10329	8.01363e-06
4-ethyl-2-methyl-2-octenoic acid	C11H20O2	309034	320740	293821	269294	217104	283689	311343	362226	74478.3	86984.4	87988.8	61451.4	63170	86007.9	65822.3	57758.6	0.232727	-2.10329	8.01363e-06
Undecylic acid	C11H22O2	1.69237e+06	2.03593e+06	1.91863e+06	1.48279e+06	1.27121e+06	1.57707e+06	2.09075e+06	1.89838e+06	420139	511203	302649	268375	350309	670715	291895	289214	0.181845	-2.45922	6.23854e-06
Heptyl butyrate	C11H22O2	1.69237e+06	2.03593e+06	1.91863e+06	1.48279e+06	1.27121e+06	1.57707e+06	2.09075e+06	1.89838e+06	420139	511203	302649	268375	350309	670715	291895	289214	0.181845	-2.45922	6.23854e-06
9-methyl-decanoic acid	C11H22O2	1.69237e+06	2.03593e+06	1.91863e+06	1.48279e+06	1.27121e+06	1.57707e+06	2.09075e+06	1.89838e+06	420139	511203	302649	268375	350309	670715	291895	289214	0.181845	-2.45922	6.23854e-06
Isobutyl enanthate	C11H22O2	1.69237e+06	2.03593e+06	1.91863e+06	1.48279e+06	1.27121e+06	1.57707e+06	2.09075e+06	1.89838e+06	420139	511203	302649	268375	350309	670715	291895	289214	0.181845	-2.45922	6.23854e-06
Octyl propanoate	C11H22O2	1.69237e+06	2.03593e+06	1.91863e+06	1.48279e+06	1.27121e+06	1.57707e+06	2.09075e+06	1.89838e+06	420139	511203	302649	268375	350309	670715	291895	289214	0.181845	-2.45922	6.23854e-06
7,7-Diethoxy-3-heptene	C11H22O2	1.69237e+06	2.03593e+06	1.91863e+06	1.48279e+06	1.27121e+06	1.57707e+06	2.09075e+06	1.89838e+06	420139	511203	302649	268375	350309	670715	291895	289214	0.181845	-2.45922	6.23854e-06
8-methyl-decanoic acid	C11H22O2	1.69237e+06	2.03593e+06	1.91863e+06	1.48279e+06	1.27121e+06	1.57707e+06	2.09075e+06	1.89838e+06	420139	511203	302649	268375	350309	670715	291895	289214	0.181845	-2.45922	6.23854e-06
formyl decanoate	C11H22O2	1.69237e+06	2.03593e+06	1.91863e+06	1.48279e+06	1.27121e+06	1.57707e+06	2.09075e+06	1.89838e+06	420139	511203	302649	268375	350309	670715	291895	289214	0.181845	-2.45922	6.23854e-06
2-Methylbutyl hexanoate	C11H22O2	1.69237e+06	2.03593e+06	1.91863e+06	1.48279e+06	1.27121e+06	1.57707e+06	2.09075e+06	1.89838e+06	420139	511203	302649	268375	350309	670715	291895	289214	0.181845	-2.45922	6.23854e-06
Propyl octanoate	C11H22O2	1.69237e+06	2.03593e+06	1.91863e+06	1.48279e+06	1.27121e+06	1.57707e+06	2.09075e+06	1.89838e+06	420139	511203	302649	268375	350309	670715	291895	289214	0.181845	-2.45922	6.23854e-06
Hexyl 2-methylbutanoate	C11H22O2	1.69237e+06	2.03593e+06	1.91863e+06	1.48279e+06	1.27121e+06	1.57707e+06	2.09075e+06	1.89838e+06	420139	511203	302649	268375	350309	670715	291895	289214	0.181845	-2.45922	6.23854e-06
Ethyl nonanoate	C11H22O2	1.69237e+06	2.03593e+06	1.91863e+06	1.48279e+06	1.27121e+06	1.57707e+06	2.09075e+06	1.89838e+06	420139	511203	302649	268375	350309	670715	291895	289214	0.181845	-2.45922	6.23854e-06
Heptyl 2-methylpropanoate	C11H22O2	1.69237e+06	2.03593e+06	1.91863e+06	1.48279e+06	1.27121e+06	1.57707e+06	2.09075e+06	1.89838e+06	420139	511203	302649	268375	350309	670715	291895	289214	0.181845	-2.45922	6.23854e-06
Nonyl acetate	C11H22O2	1.69237e+06	2.03593e+06	1.91863e+06	1.48279e+06	1.27121e+06	1.57707e+06	2.09075e+06	1.89838e+06	420139	511203	302649	268375	350309	670715	291895	289214	0.181845	-2.45922	6.23854e-06
Hexyl 3-methylbutanoate	C11H22O2	1.69237e+06	2.03593e+06	1.91863e+06	1.48279e+06	1.27121e+06	1.57707e+06	2.09075e+06	1.89838e+06	420139	511203	302649	268375	350309	670715	291895	289214	0.181845	-2.45922	6.23854e-06
2-Hexyl-4,5-dimethyl-1,3-dioxolane	C11H22O2	1.69237e+06	2.03593e+06	1.91863e+06	1.48279e+06	1.27121e+06	1.57707e+06	2.09075e+06	1.89838e+06	420139	511203	302649	268375	350309	670715	291895	289214	0.181845	-2.45922	6.23854e-06
6,6-Dimethoxy-2,5,5-trimethyl-2-hexene	C11H22O2	1.69237e+06	2.03593e+06	1.91863e+06	1.48279e+06	1.27121e+06	1.57707e+06	2.09075e+06	1.89838e+06	420139	511203	302649	268375	350309	670715	291895	289214	0.181845	-2.45922	6.23854e-06
valeryl hexanoate	C11H22O2	1.69237e+06	2.03593e+06	1.91863e+06	1.48279e+06	1.27121e+06	1.57707e+06	2.09075e+06	1.89838e+06	420139	511203	302649	268375	350309	670715	291895	289214	0.181845	-2.45922	6.23854e-06
4,8-dimethyl-nonanoic acid	C11H22O2	1.69237e+06	2.03593e+06	1.91863e+06	1.48279e+06	1.27121e+06	1.57707e+06	2.09075e+06	1.89838e+06	420139	511203	302649	268375	350309	670715	291895	289214	0.181845	-2.45922	6.23854e-06
Butyl heptanoate	C11H22O2	1.69237e+06	2.03593e+06	1.91863e+06	1.48279e+06	1.27121e+06	1.57707e+06	2.09075e+06	1.89838e+06	420139	511203	302649	268375	350309	670715	291895	289214	0.181845	-2.45922	6.23854e-06
3-Methylbutyl hexanoate	C11H22O2	1.69237e+06	2.03593e+06	1.91863e+06	1.48279e+06	1.27121e+06	1.57707e+06	2.09075e+06	1.89838e+06	420139	511203	302649	268375	350309	670715	291895	289214	0.181845	-2.45922	6.23854e-06
Octanal propyleneglycol acetal	C11H22O2	1.69237e+06	2.03593e+06	1.91863e+06	1.48279e+06	1.27121e+06	1.57707e+06	2.09075e+06	1.89838e+06	420139	511203	302649	268375	350309	670715	291895	289214	0.181845	-2.45922	6.23854e-06
2-methyl-decanoic acid	C11H22O2	1.69237e+06	2.03593e+06	1.91863e+06	1.48279e+06	1.27121e+06	1.57707e+06	2.09075e+06	1.89838e+06	420139	511203	302649	268375	350309	670715	291895	289214	0.181845	-2.45922	6.23854e-06
4-Methyloctyl acetate	C11H22O2	1.69237e+06	2.03593e+06	1.91863e+06	1.48279e+06	1.27121e+06	1.57707e+06	2.09075e+06	1.89838e+06	420139	511203	302649	268375	350309	670715	291895	289214	0.181845	-2.45922	6.23854e-06
Isopropyl octanoate	C11H22O2	1.69237e+06	2.03593e+06	1.91863e+06	1.48279e+06	1.27121e+06	1.57707e+06	2.09075e+06	1.89838e+06	420139	511203	302649	268375	350309	670715	291895	289214	0.181845	-2.45922	6.23854e-06
3,7-Dimethyl-6-octenyl formate	C11H22O2	1.69237e+06	2.03593e+06	1.91863e+06	1.48279e+06	1.27121e+06	1.57707e+06	2.09075e+06	1.89838e+06	420139	511203	302649	268375	350309	670715	291895	289214	0.181845	-2.45922	6.23854e-06
Methyl 3,7-dimethyl-6-octenoate	C11H22O2	1.69237e+06	2.03593e+06	1.91863e+06	1.48279e+06	1.27121e+06	1.57707e+06	2.09075e+06	1.89838e+06	420139	511203	302649	268375	350309	670715	291895	289214	0.181845	-2.45922	6.23854e-06
ethyl 4-methyl-octanoate	C11H22O2	1.69237e+06	2.03593e+06	1.91863e+06	1.48279e+06	1.27121e+06	1.57707e+06	2.09075e+06	1.89838e+06	420139	511203	302649	268375	350309	670715	291895	289214	0.181845	-2.45922	6.23854e-06
decyl formate	C11H22O2	1.69237e+06	2.03593e+06	1.91863e+06	1.48279e+06	1.27121e+06	1.57707e+06	2.09075e+06	1.89838e+06	420139	511203	302649	268375	350309	670715	291895	289214	0.181845	-2.45922	6.23854e-06
2-Hydroxyundecan-6-one	C11H22O2	1.69237e+06	2.03593e+06	1.91863e+06	1.48279e+06	1.27121e+06	1.57707e+06	2.09075e+06	1.89838e+06	420139	511203	302649	268375	350309	670715	291895	289214	0.181845	-2.45922	6.23854e-06
3,3-dimethyl-nonanoic acid	C11H22O2	1.69237e+06	2.03593e+06	1.91863e+06	1.48279e+06	1.27121e+06	1.57707e+06	2.09075e+06	1.89838e+06	420139	511203	302649	268375	350309	670715	291895	289214	0.181845	-2.45922	6.23854e-06
6-methyl-decanoic acid	C11H22O2	1.69237e+06	2.03593e+06	1.91863e+06	1.48279e+06	1.27121e+06	1.57707e+06	2.09075e+06	1.89838e+06	420139	511203	302649	268375	350309	670715	291895	289214	0.181845	-2.45922	6.23854e-06
5-methyl-decanoic acid	C11H22O2	1.69237e+06	2.03593e+06	1.91863e+06	1.48279e+06	1.27121e+06	1.57707e+06	2.09075e+06	1.89838e+06	420139	511203	302649	268375	350309	670715	291895	289214	0.181845	-2.45922	6.23854e-06
7-methyl-decanoic acid	C11H22O2	1.69237e+06	2.03593e+06	1.91863e+06	1.48279e+06	1.27121e+06	1.57707e+06	2.09075e+06	1.89838e+06	420139	511203	302649	268375	350309	670715	291895	289214	0.181845	-2.45922	6.23854e-06
4-methyl-decanoic acid	C11H22O2	1.69237e+06	2.03593e+06	1.91863e+06	1.48279e+06	1.27121e+06	1.57707e+06	2.09075e+06	1.89838e+06	420139	511203	302649	268375	350309	670715	291895	289214	0.181845	-2.45922	6.23854e-06
3-methyl-decanoic acid	C11H22O2	1.69237e+06	2.03593e+06	1.91863e+06	1.48279e+06	1.27121e+06	1.57707e+06	2.09075e+06	1.89838e+06	420139	511203	302649	268375	350309	670715	291895	289214	0.181845	-2.45922	6.23854e-06
5R-methyl-decanoic acid	C11H22O2	1.69237e+06	2.03593e+06	1.91863e+06	1.48279e+06	1.27121e+06	1.57707e+06	2.09075e+06	1.89838e+06	420139	511203	302649	268375	350309	670715	291895	289214	0.181845	-2.45922	6.23854e-06
9:0(8Me,8Me)	C11H22O2	1.69237e+06	2.03593e+06	1.91863e+06	1.48279e+06	1.27121e+06	1.57707e+06	2.09075e+06	1.89838e+06	420139	511203	302649	268375	350309	670715	291895	289214	0.181845	-2.45922	6.23854e-06
6-Pentyl-1,4-dioxan-2-one	C9H16O3	1.10711e+06	1.31182e+06	1.11279e+06	1.0609e+06	708269	1.0635e+06	1.11293e+06	948679	398265	415068	533082	456364	548269	788674	363725	311804	0.40147	-1.31664	8.37536e-05
5-Pentyl-1,4-dioxan-2-one	C9H16O3	1.10711e+06	1.31182e+06	1.11279e+06	1.0609e+06	708269	1.0635e+06	1.11293e+06	948679	398265	415068	533082	456364	548269	788674	363725	311804	0.40147	-1.31664	8.37536e-05
4-hydroperoxynonenal	C9H16O3	1.10711e+06	1.31182e+06	1.11279e+06	1.0609e+06	708269	1.0635e+06	1.11293e+06	948679	398265	415068	533082	456364	548269	788674	363725	311804	0.40147	-1.31664	8.37536e-05
Butyl 3-hydroxy-2-methylidenebutanoate	C9H16O3	1.10711e+06	1.31182e+06	1.11279e+06	1.0609e+06	708269	1.0635e+06	1.11293e+06	948679	398265	415068	533082	456364	548269	788674	363725	311804	0.40147	-1.31664	8.37536e-05
2-Methylpropyl 3-hydroxy-2-methylidenebutanoate	C9H16O3	1.10711e+06	1.31182e+06	1.11279e+06	1.0609e+06	708269	1.0635e+06	1.11293e+06	948679	398265	415068	533082	456364	548269	788674	363725	311804	0.40147	-1.31664	8.37536e-05
Butyl levulinate	C9H16O3	1.10711e+06	1.31182e+06	1.11279e+06	1.0609e+06	708269	1.0635e+06	1.11293e+06	948679	398265	415068	533082	456364	548269	788674	363725	311804	0.40147	-1.31664	8.37536e-05
Tetrahydrofurfuryl butyrate	C9H16O3	1.10711e+06	1.31182e+06	1.11279e+06	1.0609e+06	708269	1.0635e+06	1.11293e+06	948679	398265	415068	533082	456364	548269	788674	363725	311804	0.40147	-1.31664	8.37536e-05
cis-3-Hexenyl lactate	C9H16O3	1.10711e+06	1.31182e+06	1.11279e+06	1.0609e+06	708269	1.0635e+06	1.11293e+06	948679	398265	415068	533082	456364	548269	788674	363725	311804	0.40147	-1.31664	8.37536e-05
3-Methylbutyl 3-oxobutanoate	C9H16O3	1.10711e+06	1.31182e+06	1.11279e+06	1.0609e+06	708269	1.0635e+06	1.11293e+06	948679	398265	415068	533082	456364	548269	788674	363725	311804	0.40147	-1.31664	8.37536e-05
9-oxo-nonanoic acid	C9H16O3	1.10711e+06	1.31182e+06	1.11279e+06	1.0609e+06	708269	1.0635e+06	1.11293e+06	948679	398265	415068	533082	456364	548269	788674	363725	311804	0.40147	-1.31664	8.37536e-05
(4S,6S)-4-Hydroxy-1,7-dioxaspiro[5.5]undecane	C9H16O3	1.10711e+06	1.31182e+06	1.11279e+06	1.0609e+06	708269	1.0635e+06	1.11293e+06	948679	398265	415068	533082	456364	548269	788674	363725	311804	0.40147	-1.31664	8.37536e-05
(4R,6S)-4-Hydroxy-1,7-dioxaspiro[5.5]undecane	C9H16O3	1.10711e+06	1.31182e+06	1.11279e+06	1.0609e+06	708269	1.0635e+06	1.11293e+06	948679	398265	415068	533082	456364	548269	788674	363725	311804	0.40147	-1.31664	8.37536e-05
(3S,6S)-3-Hydroxy-1,7-dioxaspiro[5.5]undecane	C9H16O3	1.10711e+06	1.31182e+06	1.11279e+06	1.0609e+06	708269	1.0635e+06	1.11293e+06	948679	398265	415068	533082	456364	548269	788674	363725	311804	0.40147	-1.31664	8.37536e-05
(3R,6S)-3-Hydroxy-1,7-dioxaspiro[5.5]undecane	C9H16O3	1.10711e+06	1.31182e+06	1.11279e+06	1.0609e+06	708269	1.0635e+06	1.11293e+06	948679	398265	415068	533082	456364	548269	788674	363725	311804	0.40147	-1.31664	8.37536e-05
4-n-valeryl butyric acid	C9H16O3	1.10711e+06	1.31182e+06	1.11279e+06	1.0609e+06	708269	1.0635e+06	1.11293e+06	948679	398265	415068	533082	456364	548269	788674	363725	311804	0.40147	-1.31664	8.37536e-05
3-caproyl propionic acid	C9H16O3	1.10711e+06	1.31182e+06	1.11279e+06	1.0609e+06	708269	1.0635e+06	1.11293e+06	948679	398265	415068	533082	456364	548269	788674	363725	311804	0.40147	-1.31664	8.37536e-05
6-propionyl n-caproic acid	C9H16O3	1.10711e+06	1.31182e+06	1.11279e+06	1.0609e+06	708269	1.0635e+06	1.11293e+06	948679	398265	415068	533082	456364	548269	788674	363725	311804	0.40147	-1.31664	8.37536e-05
n-butyrl n-valeric acid	C9H16O3	1.10711e+06	1.31182e+06	1.11279e+06	1.0609e+06	708269	1.0635e+06	1.11293e+06	948679	398265	415068	533082	456364	548269	788674	363725	311804	0.40147	-1.31664	8.37536e-05
n-heptanoyl acetic acid	C9H16O3	1.10711e+06	1.31182e+06	1.11279e+06	1.0609e+06	708269	1.0635e+06	1.11293e+06	948679	398265	415068	533082	456364	548269	788674	363725	311804	0.40147	-1.31664	8.37536e-05
8-oxo-nonanoic acid	C9H16O3	1.10711e+06	1.31182e+06	1.11279e+06	1.0609e+06	708269	1.0635e+06	1.11293e+06	948679	398265	415068	533082	456364	548269	788674	363725	311804	0.40147	-1.31664	8.37536e-05
7-methyl-4-oxo-octanoic acid	C9H16O3	1.10711e+06	1.31182e+06	1.11279e+06	1.0609e+06	708269	1.0635e+06	1.11293e+06	948679	398265	415068	533082	456364	548269	788674	363725	311804	0.40147	-1.31664	8.37536e-05
3-oxo-nonanoic acid	C9H16O3	1.10711e+06	1.31182e+06	1.11279e+06	1.0609e+06	708269	1.0635e+06	1.11293e+06	948679	398265	415068	533082	456364	548269	788674	363725	311804	0.40147	-1.31664	8.37536e-05
7-methyl-6-oxo-octanoic acid	C9H16O3	1.10711e+06	1.31182e+06	1.11279e+06	1.0609e+06	708269	1.0635e+06	1.11293e+06	948679	398265	415068	533082	456364	548269	788674	363725	311804	0.40147	-1.31664	8.37536e-05
7-methyl-3-oxooctanoic acid	C9H16O3	1.10711e+06	1.31182e+06	1.11279e+06	1.0609e+06	708269	1.0635e+06	1.11293e+06	948679	398265	415068	533082	456364	548269	788674	363725	311804	0.40147	-1.31664	8.37536e-05
9-hydroxy-5Z-nonenoic acid	C9H16O3	1.10711e+06	1.31182e+06	1.11279e+06	1.0609e+06	708269	1.0635e+06	1.11293e+06	948679	398265	415068	533082	456364	548269	788674	363725	311804	0.40147	-1.31664	8.37536e-05
Polypropylene glycol (m w 1,200-3,000)	C6H14O3	748194	996957	775953	675766	592306	668627	669395	707210	142033	106899	321610	300288	309514	550193	116758	177014	0.345127	-1.5348	0.000110897
1,2,6-Hexanetriol	C6H14O3	748194	996957	775953	675766	592306	668627	669395	707210	142033	106899	321610	300288	309514	550193	116758	177014	0.345127	-1.5348	0.000110897
Epoxyanethole	C10H12O2	319857	360362	339209	294864	228467	318225	320920	294556	110117	97077.6	225574	51406.6	43058.9	110897	113319	57713.3	0.324715	-1.62275	3.18726e-05
Thymoquinone	C10H12O2	319857	360362	339209	294864	228467	318225	320920	294556	110117	97077.6	225574	51406.6	43058.9	110897	113319	57713.3	0.324715	-1.62275	3.18726e-05
3-Phenylpropyl formate	C10H12O2	319857	360362	339209	294864	228467	318225	320920	294556	110117	97077.6	225574	51406.6	43058.9	110897	113319	57713.3	0.324715	-1.62275	3.18726e-05
Benzenebutanoic acid	C10H12O2	319857	360362	339209	294864	228467	318225	320920	294556	110117	97077.6	225574	51406.6	43058.9	110897	113319	57713.3	0.324715	-1.62275	3.18726e-05
2-Phenylbutyric acid	C10H12O2	319857	360362	339209	294864	228467	318225	320920	294556	110117	97077.6	225574	51406.6	43058.9	110897	113319	57713.3	0.324715	-1.62275	3.18726e-05
Egomaketone	C10H12O2	319857	360362	339209	294864	228467	318225	320920	294556	110117	97077.6	225574	51406.6	43058.9	110897	113319	57713.3	0.324715	-1.62275	3.18726e-05
Phenethyl acetate	C10H12O2	319857	360362	339209	294864	228467	318225	320920	294556	110117	97077.6	225574	51406.6	43058.9	110897	113319	57713.3	0.324715	-1.62275	3.18726e-05
4-Isopropylbenzoic acid	C10H12O2	319857	360362	339209	294864	228467	318225	320920	294556	110117	97077.6	225574	51406.6	43058.9	110897	113319	57713.3	0.324715	-1.62275	3.18726e-05
beta-Thujaplicin	C10H12O2	319857	360362	339209	294864	228467	318225	320920	294556	110117	97077.6	225574	51406.6	43058.9	110897	113319	57713.3	0.324715	-1.62275	3.18726e-05
3-Phenylbutyric acid	C10H12O2	319857	360362	339209	294864	228467	318225	320920	294556	110117	97077.6	225574	51406.6	43058.9	110897	113319	57713.3	0.324715	-1.62275	3.18726e-05
Lepalone	C10H12O2	319857	360362	339209	294864	228467	318225	320920	294556	110117	97077.6	225574	51406.6	43058.9	110897	113319	57713.3	0.324715	-1.62275	3.18726e-05
Eugenol	C10H12O2	319857	360362	339209	294864	228467	318225	320920	294556	110117	97077.6	225574	51406.6	43058.9	110897	113319	57713.3	0.324715	-1.62275	3.18726e-05
Isoeugenol	C10H12O2	319857	360362	339209	294864	228467	318225	320920	294556	110117	97077.6	225574	51406.6	43058.9	110897	113319	57713.3	0.324715	-1.62275	3.18726e-05
1,2-Dimethoxy-4-vinylbenzene	C10H12O2	319857	360362	339209	294864	228467	318225	320920	294556	110117	97077.6	225574	51406.6	43058.9	110897	113319	57713.3	0.324715	-1.62275	3.18726e-05
4-Methylbenzyl alcohol acetate	C10H12O2	319857	360362	339209	294864	228467	318225	320920	294556	110117	97077.6	225574	51406.6	43058.9	110897	113319	57713.3	0.324715	-1.62275	3.18726e-05
Benzyl propionate	C10H12O2	319857	360362	339209	294864	228467	318225	320920	294556	110117	97077.6	225574	51406.6	43058.9	110897	113319	57713.3	0.324715	-1.62275	3.18726e-05
Methyl 3-phenylpropanoate	C10H12O2	319857	360362	339209	294864	228467	318225	320920	294556	110117	97077.6	225574	51406.6	43058.9	110897	113319	57713.3	0.324715	-1.62275	3.18726e-05
Isopropyl benzoate	C10H12O2	319857	360362	339209	294864	228467	318225	320920	294556	110117	97077.6	225574	51406.6	43058.9	110897	113319	57713.3	0.324715	-1.62275	3.18726e-05
3-Hydroxy-4-phenylbutan-2-one	C10H12O2	319857	360362	339209	294864	228467	318225	320920	294556	110117	97077.6	225574	51406.6	43058.9	110897	113319	57713.3	0.324715	-1.62275	3.18726e-05
Isoegomaketone	C10H12O2	319857	360362	339209	294864	228467	318225	320920	294556	110117	97077.6	225574	51406.6	43058.9	110897	113319	57713.3	0.324715	-1.62275	3.18726e-05
(3-Methylphenyl)methyl acetate	C10H12O2	319857	360362	339209	294864	228467	318225	320920	294556	110117	97077.6	225574	51406.6	43058.9	110897	113319	57713.3	0.324715	-1.62275	3.18726e-05
2-Methylbenzyl alcohol acetate	C10H12O2	319857	360362	339209	294864	228467	318225	320920	294556	110117	97077.6	225574	51406.6	43058.9	110897	113319	57713.3	0.324715	-1.62275	3.18726e-05
Phenyl butyrate	C10H12O2	319857	360362	339209	294864	228467	318225	320920	294556	110117	97077.6	225574	51406.6	43058.9	110897	113319	57713.3	0.324715	-1.62275	3.18726e-05
Propyl benzoate	C10H12O2	319857	360362	339209	294864	228467	318225	320920	294556	110117	97077.6	225574	51406.6	43058.9	110897	113319	57713.3	0.324715	-1.62275	3.18726e-05
4-(4-Hydroxyphenyl)-2-butanone	C10H12O2	319857	360362	339209	294864	228467	318225	320920	294556	110117	97077.6	225574	51406.6	43058.9	110897	113319	57713.3	0.324715	-1.62275	3.18726e-05
p-Mentha-2,4(8)-dien-9,3-olide	C10H12O2	319857	360362	339209	294864	228467	318225	320920	294556	110117	97077.6	225574	51406.6	43058.9	110897	113319	57713.3	0.324715	-1.62275	3.18726e-05
4-Methyl-2-phenyl-1,3-dioxolane	C10H12O2	319857	360362	339209	294864	228467	318225	320920	294556	110117	97077.6	225574	51406.6	43058.9	110897	113319	57713.3	0.324715	-1.62275	3.18726e-05
1-(4-Methoxyphenyl)-2-propanone	C10H12O2	319857	360362	339209	294864	228467	318225	320920	294556	110117	97077.6	225574	51406.6	43058.9	110897	113319	57713.3	0.324715	-1.62275	3.18726e-05
Ethyl phenylacetate	C10H12O2	319857	360362	339209	294864	228467	318225	320920	294556	110117	97077.6	225574	51406.6	43058.9	110897	113319	57713.3	0.324715	-1.62275	3.18726e-05
1-Phenylethyl acetate	C10H12O2	319857	360362	339209	294864	228467	318225	320920	294556	110117	97077.6	225574	51406.6	43058.9	110897	113319	57713.3	0.324715	-1.62275	3.18726e-05
3-(4-Methoxyphenyl)-2-propen-1-ol	C10H12O2	319857	360362	339209	294864	228467	318225	320920	294556	110117	97077.6	225574	51406.6	43058.9	110897	113319	57713.3	0.324715	-1.62275	3.18726e-05
(2E,4E,6E)-2,6-Dimethylocta-2,4,6-trienedial	C10H12O2	319857	360362	339209	294864	228467	318225	320920	294556	110117	97077.6	225574	51406.6	43058.9	110897	113319	57713.3	0.324715	-1.62275	3.18726e-05
Dihydrosafrole	C10H12O2	319857	360362	339209	294864	228467	318225	320920	294556	110117	97077.6	225574	51406.6	43058.9	110897	113319	57713.3	0.324715	-1.62275	3.18726e-05
gamma-Thujaplicin	C10H12O2	319857	360362	339209	294864	228467	318225	320920	294556	110117	97077.6	225574	51406.6	43058.9	110897	113319	57713.3	0.324715	-1.62275	3.18726e-05
Evodone	C10H12O2	319857	360362	339209	294864	228467	318225	320920	294556	110117	97077.6	225574	51406.6	43058.9	110897	113319	57713.3	0.324715	-1.62275	3.18726e-05
2,4-decadiynoic acid	C10H12O2	319857	360362	339209	294864	228467	318225	320920	294556	110117	97077.6	225574	51406.6	43058.9	110897	113319	57713.3	0.324715	-1.62275	3.18726e-05
Imiquimod	C14H16N4	207123	220217	258707	188342	205591	213116	188096	168308	39516.4	30883.2	40960.6	33006.9	41368.9	41492.2	29837.2	35163.5	0.180948	-2.46635	6.23854e-06
(3R,3aR,7aS)-3-Butylhexahydro-1(3H)-isobenzofuranone	C12H20O2	76362.4	90894.3	75547.2	68709.6	61595.6	78885	63850.5	79108	20682.8	28552	27393	19356.9	29384.6	34331.1	25908.6	27730.2	0.362868	-1.46248	4.5654e-06
cis-3-Hexenyl cis-3-hexenoate	C12H20O2	76362.4	90894.3	75547.2	68709.6	61595.6	78885	63850.5	79108	20682.8	28552	27393	19356.9	29384.6	34331.1	25908.6	27730.2	0.362868	-1.46248	4.5654e-06
cis-3-Hexenyl trans-2-hexenoate	C12H20O2	76362.4	90894.3	75547.2	68709.6	61595.6	78885	63850.5	79108	20682.8	28552	27393	19356.9	29384.6	34331.1	25908.6	27730.2	0.362868	-1.46248	4.5654e-06
6-Heptyl-5,6-dihydro-2H-pyran-2-one	C12H20O2	76362.4	90894.3	75547.2	68709.6	61595.6	78885	63850.5	79108	20682.8	28552	27393	19356.9	29384.6	34331.1	25908.6	27730.2	0.362868	-1.46248	4.5654e-06
3,7-Dimethyl-2Z,6-octadienyl acetate	C12H20O2	76362.4	90894.3	75547.2	68709.6	61595.6	78885	63850.5	79108	20682.8	28552	27393	19356.9	29384.6	34331.1	25908.6	27730.2	0.362868	-1.46248	4.5654e-06
Linalyl acetate	C12H20O2	76362.4	90894.3	75547.2	68709.6	61595.6	78885	63850.5	79108	20682.8	28552	27393	19356.9	29384.6	34331.1	25908.6	27730.2	0.362868	-1.46248	4.5654e-06
Fenchyl acetate	C12H20O2	76362.4	90894.3	75547.2	68709.6	61595.6	78885	63850.5	79108	20682.8	28552	27393	19356.9	29384.6	34331.1	25908.6	27730.2	0.362868	-1.46248	4.5654e-06
Isopulegol acetate	C12H20O2	76362.4	90894.3	75547.2	68709.6	61595.6	78885	63850.5	79108	20682.8	28552	27393	19356.9	29384.6	34331.1	25908.6	27730.2	0.362868	-1.46248	4.5654e-06
Dihydro-5-(2-octenyl)-2(3H)-furanone	C12H20O2	76362.4	90894.3	75547.2	68709.6	61595.6	78885	63850.5	79108	20682.8	28552	27393	19356.9	29384.6	34331.1	25908.6	27730.2	0.362868	-1.46248	4.5654e-06
Allyl cyclohexylpropionate	C12H20O2	76362.4	90894.3	75547.2	68709.6	61595.6	78885	63850.5	79108	20682.8	28552	27393	19356.9	29384.6	34331.1	25908.6	27730.2	0.362868	-1.46248	4.5654e-06
Methyl 2-undecynoate	C12H20O2	76362.4	90894.3	75547.2	68709.6	61595.6	78885	63850.5	79108	20682.8	28552	27393	19356.9	29384.6	34331.1	25908.6	27730.2	0.362868	-1.46248	4.5654e-06
(-)-Bornyl acetate	C12H20O2	76362.4	90894.3	75547.2	68709.6	61595.6	78885	63850.5	79108	20682.8	28552	27393	19356.9	29384.6	34331.1	25908.6	27730.2	0.362868	-1.46248	4.5654e-06
alpha-Terpinyl acetate	C12H20O2	76362.4	90894.3	75547.2	68709.6	61595.6	78885	63850.5	79108	20682.8	28552	27393	19356.9	29384.6	34331.1	25908.6	27730.2	0.362868	-1.46248	4.5654e-06
alpha-Campholene acetate	C12H20O2	76362.4	90894.3	75547.2	68709.6	61595.6	78885	63850.5	79108	20682.8	28552	27393	19356.9	29384.6	34331.1	25908.6	27730.2	0.362868	-1.46248	4.5654e-06
(Z)-4-Hydroxy-6-dodecenoic acid lactone	C12H20O2	76362.4	90894.3	75547.2	68709.6	61595.6	78885	63850.5	79108	20682.8	28552	27393	19356.9	29384.6	34331.1	25908.6	27730.2	0.362868	-1.46248	4.5654e-06
3,7-Dimethyl-2,6-octadien-1-ylacetate	C12H20O2	76362.4	90894.3	75547.2	68709.6	61595.6	78885	63850.5	79108	20682.8	28552	27393	19356.9	29384.6	34331.1	25908.6	27730.2	0.362868	-1.46248	4.5654e-06
ethyl 2E,4Z-decadienoate	C12H20O2	76362.4	90894.3	75547.2	68709.6	61595.6	78885	63850.5	79108	20682.8	28552	27393	19356.9	29384.6	34331.1	25908.6	27730.2	0.362868	-1.46248	4.5654e-06
Artemisia alcohol acetate	C12H20O2	76362.4	90894.3	75547.2	68709.6	61595.6	78885	63850.5	79108	20682.8	28552	27393	19356.9	29384.6	34331.1	25908.6	27730.2	0.362868	-1.46248	4.5654e-06
Dihydrocarveol acetate	C12H20O2	76362.4	90894.3	75547.2	68709.6	61595.6	78885	63850.5	79108	20682.8	28552	27393	19356.9	29384.6	34331.1	25908.6	27730.2	0.362868	-1.46248	4.5654e-06
(S)-Santolina acetate	C12H20O2	76362.4	90894.3	75547.2	68709.6	61595.6	78885	63850.5	79108	20682.8	28552	27393	19356.9	29384.6	34331.1	25908.6	27730.2	0.362868	-1.46248	4.5654e-06
cis-3-Hexenyl trans-4-hexenoate	C12H20O2	76362.4	90894.3	75547.2	68709.6	61595.6	78885	63850.5	79108	20682.8	28552	27393	19356.9	29384.6	34331.1	25908.6	27730.2	0.362868	-1.46248	4.5654e-06
p-Menth-1-en-9-ol acetate	C12H20O2	76362.4	90894.3	75547.2	68709.6	61595.6	78885	63850.5	79108	20682.8	28552	27393	19356.9	29384.6	34331.1	25908.6	27730.2	0.362868	-1.46248	4.5654e-06
Yuzu lactone	C12H20O2	76362.4	90894.3	75547.2	68709.6	61595.6	78885	63850.5	79108	20682.8	28552	27393	19356.9	29384.6	34331.1	25908.6	27730.2	0.362868	-1.46248	4.5654e-06
(1S,2R,4S)-(-)-Bornyl acetate	C12H20O2	76362.4	90894.3	75547.2	68709.6	61595.6	78885	63850.5	79108	20682.8	28552	27393	19356.9	29384.6	34331.1	25908.6	27730.2	0.362868	-1.46248	4.5654e-06
3,7-Dimethyl-2E,6-octadienyl acetate	C12H20O2	76362.4	90894.3	75547.2	68709.6	61595.6	78885	63850.5	79108	20682.8	28552	27393	19356.9	29384.6	34331.1	25908.6	27730.2	0.362868	-1.46248	4.5654e-06
Linalyl acetate	C12H20O2	76362.4	90894.3	75547.2	68709.6	61595.6	78885	63850.5	79108	20682.8	28552	27393	19356.9	29384.6	34331.1	25908.6	27730.2	0.362868	-1.46248	4.5654e-06
beta-Terpinyl acetate	C12H20O2	76362.4	90894.3	75547.2	68709.6	61595.6	78885	63850.5	79108	20682.8	28552	27393	19356.9	29384.6	34331.1	25908.6	27730.2	0.362868	-1.46248	4.5654e-06
gamma-Terpinyl acetate	C12H20O2	76362.4	90894.3	75547.2	68709.6	61595.6	78885	63850.5	79108	20682.8	28552	27393	19356.9	29384.6	34331.1	25908.6	27730.2	0.362868	-1.46248	4.5654e-06
(1R,2S,4R)-(+)-Bornyl acetate	C12H20O2	76362.4	90894.3	75547.2	68709.6	61595.6	78885	63850.5	79108	20682.8	28552	27393	19356.9	29384.6	34331.1	25908.6	27730.2	0.362868	-1.46248	4.5654e-06
8E-Hydroxy-4,8-dimethyl-4,9-decadienal	C12H20O2	76362.4	90894.3	75547.2	68709.6	61595.6	78885	63850.5	79108	20682.8	28552	27393	19356.9	29384.6	34331.1	25908.6	27730.2	0.362868	-1.46248	4.5654e-06
7Z,9-Decadienyl acetate	C12H20O2	76362.4	90894.3	75547.2	68709.6	61595.6	78885	63850.5	79108	20682.8	28552	27393	19356.9	29384.6	34331.1	25908.6	27730.2	0.362868	-1.46248	4.5654e-06
3E,5E-Decadienyl acetate	C12H20O2	76362.4	90894.3	75547.2	68709.6	61595.6	78885	63850.5	79108	20682.8	28552	27393	19356.9	29384.6	34331.1	25908.6	27730.2	0.362868	-1.46248	4.5654e-06
3Z,5E-Decadienyl acetate	C12H20O2	76362.4	90894.3	75547.2	68709.6	61595.6	78885	63850.5	79108	20682.8	28552	27393	19356.9	29384.6	34331.1	25908.6	27730.2	0.362868	-1.46248	4.5654e-06
Isopropyl 2,4-dimethyl-2E,4E-heptadienoate	C12H20O2	76362.4	90894.3	75547.2	68709.6	61595.6	78885	63850.5	79108	20682.8	28552	27393	19356.9	29384.6	34331.1	25908.6	27730.2	0.362868	-1.46248	4.5654e-06
(E)-2-Hexenyl (E)-2-hexenoate	C12H20O2	76362.4	90894.3	75547.2	68709.6	61595.6	78885	63850.5	79108	20682.8	28552	27393	19356.9	29384.6	34331.1	25908.6	27730.2	0.362868	-1.46248	4.5654e-06
(E)-2-Hexenyl (Z)-3-hexenoate	C12H20O2	76362.4	90894.3	75547.2	68709.6	61595.6	78885	63850.5	79108	20682.8	28552	27393	19356.9	29384.6	34331.1	25908.6	27730.2	0.362868	-1.46248	4.5654e-06
Ethyl (E)-7,9-decadienoate	C12H20O2	76362.4	90894.3	75547.2	68709.6	61595.6	78885	63850.5	79108	20682.8	28552	27393	19356.9	29384.6	34331.1	25908.6	27730.2	0.362868	-1.46248	4.5654e-06
Buibuilactone	C12H20O2	76362.4	90894.3	75547.2	68709.6	61595.6	78885	63850.5	79108	20682.8	28552	27393	19356.9	29384.6	34331.1	25908.6	27730.2	0.362868	-1.46248	4.5654e-06
Cucujolide II	C12H20O2	76362.4	90894.3	75547.2	68709.6	61595.6	78885	63850.5	79108	20682.8	28552	27393	19356.9	29384.6	34331.1	25908.6	27730.2	0.362868	-1.46248	4.5654e-06
Cucujolide VIII	C12H20O2	76362.4	90894.3	75547.2	68709.6	61595.6	78885	63850.5	79108	20682.8	28552	27393	19356.9	29384.6	34331.1	25908.6	27730.2	0.362868	-1.46248	4.5654e-06
S-Cucujolide II	C12H20O2	76362.4	90894.3	75547.2	68709.6	61595.6	78885	63850.5	79108	20682.8	28552	27393	19356.9	29384.6	34331.1	25908.6	27730.2	0.362868	-1.46248	4.5654e-06
5-Dodecen-11-olide	C12H20O2	76362.4	90894.3	75547.2	68709.6	61595.6	78885	63850.5	79108	20682.8	28552	27393	19356.9	29384.6	34331.1	25908.6	27730.2	0.362868	-1.46248	4.5654e-06
9-dodecynoic acid	C12H20O2	76362.4	90894.3	75547.2	68709.6	61595.6	78885	63850.5	79108	20682.8	28552	27393	19356.9	29384.6	34331.1	25908.6	27730.2	0.362868	-1.46248	4.5654e-06
8-dodecynoic acid	C12H20O2	76362.4	90894.3	75547.2	68709.6	61595.6	78885	63850.5	79108	20682.8	28552	27393	19356.9	29384.6	34331.1	25908.6	27730.2	0.362868	-1.46248	4.5654e-06
7-dodecynoic acid	C12H20O2	76362.4	90894.3	75547.2	68709.6	61595.6	78885	63850.5	79108	20682.8	28552	27393	19356.9	29384.6	34331.1	25908.6	27730.2	0.362868	-1.46248	4.5654e-06
6-dodecynoic acid	C12H20O2	76362.4	90894.3	75547.2	68709.6	61595.6	78885	63850.5	79108	20682.8	28552	27393	19356.9	29384.6	34331.1	25908.6	27730.2	0.362868	-1.46248	4.5654e-06
5-dodecynoic acid	C12H20O2	76362.4	90894.3	75547.2	68709.6	61595.6	78885	63850.5	79108	20682.8	28552	27393	19356.9	29384.6	34331.1	25908.6	27730.2	0.362868	-1.46248	4.5654e-06
4-dodecynoic acid	C12H20O2	76362.4	90894.3	75547.2	68709.6	61595.6	78885	63850.5	79108	20682.8	28552	27393	19356.9	29384.6	34331.1	25908.6	27730.2	0.362868	-1.46248	4.5654e-06
3-dodecynoic acid	C12H20O2	76362.4	90894.3	75547.2	68709.6	61595.6	78885	63850.5	79108	20682.8	28552	27393	19356.9	29384.6	34331.1	25908.6	27730.2	0.362868	-1.46248	4.5654e-06
11-dodecynoic acid	C12H20O2	76362.4	90894.3	75547.2	68709.6	61595.6	78885	63850.5	79108	20682.8	28552	27393	19356.9	29384.6	34331.1	25908.6	27730.2	0.362868	-1.46248	4.5654e-06
10-dodecynoic acid	C12H20O2	76362.4	90894.3	75547.2	68709.6	61595.6	78885	63850.5	79108	20682.8	28552	27393	19356.9	29384.6	34331.1	25908.6	27730.2	0.362868	-1.46248	4.5654e-06
cis,cis-dodeca-3,6-dienoic acid	C12H20O2	76362.4	90894.3	75547.2	68709.6	61595.6	78885	63850.5	79108	20682.8	28552	27393	19356.9	29384.6	34331.1	25908.6	27730.2	0.362868	-1.46248	4.5654e-06
2E,4E-dodecadienoic acid	C12H20O2	76362.4	90894.3	75547.2	68709.6	61595.6	78885	63850.5	79108	20682.8	28552	27393	19356.9	29384.6	34331.1	25908.6	27730.2	0.362868	-1.46248	4.5654e-06
2Z,8E-dodecadienoic acid	C12H20O2	76362.4	90894.3	75547.2	68709.6	61595.6	78885	63850.5	79108	20682.8	28552	27393	19356.9	29384.6	34331.1	25908.6	27730.2	0.362868	-1.46248	4.5654e-06
2E,8Z-dodecadienoic acid	C12H20O2	76362.4	90894.3	75547.2	68709.6	61595.6	78885	63850.5	79108	20682.8	28552	27393	19356.9	29384.6	34331.1	25908.6	27730.2	0.362868	-1.46248	4.5654e-06
2E,8E-dodecadienoic acid	C12H20O2	76362.4	90894.3	75547.2	68709.6	61595.6	78885	63850.5	79108	20682.8	28552	27393	19356.9	29384.6	34331.1	25908.6	27730.2	0.362868	-1.46248	4.5654e-06
2E,6Z-dodecadienoic acid	C12H20O2	76362.4	90894.3	75547.2	68709.6	61595.6	78885	63850.5	79108	20682.8	28552	27393	19356.9	29384.6	34331.1	25908.6	27730.2	0.362868	-1.46248	4.5654e-06
8E,10E-dodecadienoic acid	C12H20O2	76362.4	90894.3	75547.2	68709.6	61595.6	78885	63850.5	79108	20682.8	28552	27393	19356.9	29384.6	34331.1	25908.6	27730.2	0.362868	-1.46248	4.5654e-06
7Z,9E-dodecadienoic acid	C12H20O2	76362.4	90894.3	75547.2	68709.6	61595.6	78885	63850.5	79108	20682.8	28552	27393	19356.9	29384.6	34331.1	25908.6	27730.2	0.362868	-1.46248	4.5654e-06
5E,7E-dodecadienoic acid	C12H20O2	76362.4	90894.3	75547.2	68709.6	61595.6	78885	63850.5	79108	20682.8	28552	27393	19356.9	29384.6	34331.1	25908.6	27730.2	0.362868	-1.46248	4.5654e-06
2Z,8Z-dodecadienoic acid	C12H20O2	76362.4	90894.3	75547.2	68709.6	61595.6	78885	63850.5	79108	20682.8	28552	27393	19356.9	29384.6	34331.1	25908.6	27730.2	0.362868	-1.46248	4.5654e-06
8Z,10E-dodecadienoic acid	C12H20O2	76362.4	90894.3	75547.2	68709.6	61595.6	78885	63850.5	79108	20682.8	28552	27393	19356.9	29384.6	34331.1	25908.6	27730.2	0.362868	-1.46248	4.5654e-06
Aleprylic acid	C12H20O2	76362.4	90894.3	75547.2	68709.6	61595.6	78885	63850.5	79108	20682.8	28552	27393	19356.9	29384.6	34331.1	25908.6	27730.2	0.362868	-1.46248	4.5654e-06
cis-3-Hexenyl pyruvate	C9H14O3	302554	354477	262052	268904	170559	246317	335535	450457	116390	139035	121823	127864	93240.2	157852	116102	125438	0.432686	-1.20861	0.00478229
1,4-Ipomeadiol	C9H14O3	302554	354477	262052	268904	170559	246317	335535	450457	116390	139035	121823	127864	93240.2	157852	116102	125438	0.432686	-1.20861	0.00478229
Furfural diethyl acetal	C9H14O3	302554	354477	262052	268904	170559	246317	335535	450457	116390	139035	121823	127864	93240.2	157852	116102	125438	0.432686	-1.20861	0.00478229
Phaseolic acid	C12H22O6	138005	166224	147014	135977	36234	114703	169150	255897	39487.1	23959.1	0	52871.7	15477.6	92044.4	0	24803.1	0.171084	-2.54722	0.0064161
Triethylene glycol diglycidyl ether	C12H22O6	138005	166224	147014	135977	36234	114703	169150	255897	39487.1	23959.1	0	52871.7	15477.6	92044.4	0	24803.1	0.171084	-2.54722	0.0064161
3R-hydroxy-hexanoic acid	C6H12O3	325808	397432	341500	309214	236865	242158	333978	275568	114052	122455	107787	123662	93379.2	107378	98495.5	152286	0.349339	-1.5173	0.000104064
5R-hydroxy-hexanoic acid	C6H12O3	325808	397432	341500	309214	236865	242158	333978	275568	114052	122455	107787	123662	93379.2	107378	98495.5	152286	0.349339	-1.5173	0.000104064
5-hydroxy caproic acid	C6H12O3	325808	397432	341500	309214	236865	242158	333978	275568	114052	122455	107787	123662	93379.2	107378	98495.5	152286	0.349339	-1.5173	0.000104064
D-Leucic acid	C6H12O3	325808	397432	341500	309214	236865	242158	333978	275568	114052	122455	107787	123662	93379.2	107378	98495.5	152286	0.349339	-1.5173	0.000104064
Leucinic acid	C6H12O3	325808	397432	341500	309214	236865	242158	333978	275568	114052	122455	107787	123662	93379.2	107378	98495.5	152286	0.349339	-1.5173	0.000104064
hydroxy-isocaproic acid	C6H12O3	325808	397432	341500	309214	236865	242158	333978	275568	114052	122455	107787	123662	93379.2	107378	98495.5	152286	0.349339	-1.5173	0.000104064
2-hydroxy-3-methyl-pentanoic acid	C6H12O3	325808	397432	341500	309214	236865	242158	333978	275568	114052	122455	107787	123662	93379.2	107378	98495.5	152286	0.349339	-1.5173	0.000104064
4,4-Dimethoxy-2-butanone	C6H12O3	325808	397432	341500	309214	236865	242158	333978	275568	114052	122455	107787	123662	93379.2	107378	98495.5	152286	0.349339	-1.5173	0.000104064
Threo-3-Hydroxy-2-methylbutyric acid	C6H12O3	325808	397432	341500	309214	236865	242158	333978	275568	114052	122455	107787	123662	93379.2	107378	98495.5	152286	0.349339	-1.5173	0.000104064
2-ethyl-2-hydroxy-butyric acid	C6H12O3	325808	397432	341500	309214	236865	242158	333978	275568	114052	122455	107787	123662	93379.2	107378	98495.5	152286	0.349339	-1.5173	0.000104064
DL-2-hydroxy caproic acid	C6H12O3	325808	397432	341500	309214	236865	242158	333978	275568	114052	122455	107787	123662	93379.2	107378	98495.5	152286	0.349339	-1.5173	0.000104064
Ethyl (±)-3-hydroxybutyrate	C6H12O3	325808	397432	341500	309214	236865	242158	333978	275568	114052	122455	107787	123662	93379.2	107378	98495.5	152286	0.349339	-1.5173	0.000104064
2-Methyl-3-hydroxyvaleric acid	C6H12O3	325808	397432	341500	309214	236865	242158	333978	275568	114052	122455	107787	123662	93379.2	107378	98495.5	152286	0.349339	-1.5173	0.000104064
(+/-)-1-Acetoxy-1-ethoxyethane	C6H12O3	325808	397432	341500	309214	236865	242158	333978	275568	114052	122455	107787	123662	93379.2	107378	98495.5	152286	0.349339	-1.5173	0.000104064
6-Hydroxyhexanoic acid	C6H12O3	325808	397432	341500	309214	236865	242158	333978	275568	114052	122455	107787	123662	93379.2	107378	98495.5	152286	0.349339	-1.5173	0.000104064
DL-3-hydroxy caproic acid	C6H12O3	325808	397432	341500	309214	236865	242158	333978	275568	114052	122455	107787	123662	93379.2	107378	98495.5	152286	0.349339	-1.5173	0.000104064
Butoxyacetic acid	C6H12O3	325808	397432	341500	309214	236865	242158	333978	275568	114052	122455	107787	123662	93379.2	107378	98495.5	152286	0.349339	-1.5173	0.000104064
Paraldehyde	C6H12O3	325808	397432	341500	309214	236865	242158	333978	275568	114052	122455	107787	123662	93379.2	107378	98495.5	152286	0.349339	-1.5173	0.000104064
Ethyl (R)-3-hydroxybutanoate	C6H12O3	325808	397432	341500	309214	236865	242158	333978	275568	114052	122455	107787	123662	93379.2	107378	98495.5	152286	0.349339	-1.5173	0.000104064
DL-4-hydroxy caproic acid	C6H12O3	325808	397432	341500	309214	236865	242158	333978	275568	114052	122455	107787	123662	93379.2	107378	98495.5	152286	0.349339	-1.5173	0.000104064
4-Amino-1-piperidinecarboxylic acid	C6H12N2O2	212166	78731.5	121172	122140	89956.4	200060	136945	85040.4	359445	230734	452128	402622	231540	516564	267627	228085	2.57724	1.36583	0.00756751
N,2,3-Trimethyl-2-(1-methylethyl)butanamide	C10H21NO	112883	160964	164917	126684	101852	110730	131545	113529	767771	493739	737478	710858	760653	806022	664825	756974	6.22137	2.63723	6.23854e-06
decanamide	C10H21NO	112883	160964	164917	126684	101852	110730	131545	113529	767771	493739	737478	710858	760653	806022	664825	756974	6.22137	2.63723	6.23854e-06
Diisopropyl phosphate	C6H15O4P	44797.8	32254.5	41859.2	34350.5	28941.3	33188.7	29715	22535.2	116998	72972.3	74303.7	86958.5	76215.2	79303.8	79489.1	135396	2.42642	1.27883	0.00156088
Diethanolamine	C4H11NO2	167242	212379	264066	179269	155232	181469	208585	143263	575462	161468	779569	833817	537524	388195	295359	382833	2.56618	1.35962	0.0396064
2-Amino-2-methyl-1,3-propandiol	C4H11NO2	167242	212379	264066	179269	155232	181469	208585	143263	575462	161468	779569	833817	537524	388195	295359	382833	2.56618	1.35962	0.0396064
Ethosuximide	C7H11NO2	183117	228304	250962	145830	172375	217855	170068	141584	218597	251507	384179	342404	368598	519129	273617	379229	2.00005	1.00004	0.0133162
L-Hypoglycin A	C7H11NO2	183117	228304	250962	145830	172375	217855	170068	141584	218597	251507	384179	342404	368598	519129	273617	379229	2.00005	1.00004	0.0133162
Arecaidine	C7H11NO2	183117	228304	250962	145830	172375	217855	170068	141584	218597	251507	384179	342404	368598	519129	273617	379229	2.00005	1.00004	0.0133162
Hypoglycin	C7H11NO2	183117	228304	250962	145830	172375	217855	170068	141584	218597	251507	384179	342404	368598	519129	273617	379229	2.00005	1.00004	0.0133162
Guvacoline	C7H11NO2	183117	228304	250962	145830	172375	217855	170068	141584	218597	251507	384179	342404	368598	519129	273617	379229	2.00005	1.00004	0.0133162
1,4-beta-D-Glucan	C18H32O18	55874.3	68723.2	43693.7	62725.8	33528.6	32892.6	33613.5	32976.3	87755.9	102981	89391.1	98179	101358	86673.4	80599.5	101848	2.42629	1.27875	9.59712e-05
Metenamine	C6H12N4	6547.01	13013.5	16514.1	8851.02	30451.9	25294.7	22218.6	8968.44	80506.1	16953.9	57912.8	71408.6	82641.3	46070.9	39446.6	122780	4.37968	2.13083	0.0217501
Isohydrosorbic acid	C6H10O2	34268.5	41824.2	35106.6	33477.2	26908.6	25498.6	20700.8	25431.6	51196.1	43480.4	66593.1	114095	57434.8	130957	79610.3	40931.3	2.05392	1.03838	0.0423705
Delta-Hexanolactone	C6H10O2	34268.5	41824.2	35106.6	33477.2	26908.6	25498.6	20700.8	25431.6	51196.1	43480.4	66593.1	114095	57434.8	130957	79610.3	40931.3	2.05392	1.03838	0.0423705
epsilon-Caprolactone	C6H10O2	34268.5	41824.2	35106.6	33477.2	26908.6	25498.6	20700.8	25431.6	51196.1	43480.4	66593.1	114095	57434.8	130957	79610.3	40931.3	2.05392	1.03838	0.0423705
Ethyl crotonate	C6H10O2	34268.5	41824.2	35106.6	33477.2	26908.6	25498.6	20700.8	25431.6	51196.1	43480.4	66593.1	114095	57434.8	130957	79610.3	40931.3	2.05392	1.03838	0.0423705
Methyl 4-pentenoate	C6H10O2	34268.5	41824.2	35106.6	33477.2	26908.6	25498.6	20700.8	25431.6	51196.1	43480.4	66593.1	114095	57434.8	130957	79610.3	40931.3	2.05392	1.03838	0.0423705
Allyl propionate	C6H10O2	34268.5	41824.2	35106.6	33477.2	26908.6	25498.6	20700.8	25431.6	51196.1	43480.4	66593.1	114095	57434.8	130957	79610.3	40931.3	2.05392	1.03838	0.0423705
Dihydro-4,4-dimethyl-2(3H)-furanone	C6H10O2	34268.5	41824.2	35106.6	33477.2	26908.6	25498.6	20700.8	25431.6	51196.1	43480.4	66593.1	114095	57434.8	130957	79610.3	40931.3	2.05392	1.03838	0.0423705
4-Methyl-2-pentenoic acid	C6H10O2	34268.5	41824.2	35106.6	33477.2	26908.6	25498.6	20700.8	25431.6	51196.1	43480.4	66593.1	114095	57434.8	130957	79610.3	40931.3	2.05392	1.03838	0.0423705
2-Methyl-2-pentenoic acid	C6H10O2	34268.5	41824.2	35106.6	33477.2	26908.6	25498.6	20700.8	25431.6	51196.1	43480.4	66593.1	114095	57434.8	130957	79610.3	40931.3	2.05392	1.03838	0.0423705
2-Methyl-3-pentenoic acid	C6H10O2	34268.5	41824.2	35106.6	33477.2	26908.6	25498.6	20700.8	25431.6	51196.1	43480.4	66593.1	114095	57434.8	130957	79610.3	40931.3	2.05392	1.03838	0.0423705
4-Methyl-2,3-pentanedione	C6H10O2	34268.5	41824.2	35106.6	33477.2	26908.6	25498.6	20700.8	25431.6	51196.1	43480.4	66593.1	114095	57434.8	130957	79610.3	40931.3	2.05392	1.03838	0.0423705
2-Methyl-4-pentenoic acid	C6H10O2	34268.5	41824.2	35106.6	33477.2	26908.6	25498.6	20700.8	25431.6	51196.1	43480.4	66593.1	114095	57434.8	130957	79610.3	40931.3	2.05392	1.03838	0.0423705
cis-hex-3-enoic acid	C6H10O2	34268.5	41824.2	35106.6	33477.2	26908.6	25498.6	20700.8	25431.6	51196.1	43480.4	66593.1	114095	57434.8	130957	79610.3	40931.3	2.05392	1.03838	0.0423705
3,4-Hexanedione	C6H10O2	34268.5	41824.2	35106.6	33477.2	26908.6	25498.6	20700.8	25431.6	51196.1	43480.4	66593.1	114095	57434.8	130957	79610.3	40931.3	2.05392	1.03838	0.0423705
Hexane-2,3-dione	C6H10O2	34268.5	41824.2	35106.6	33477.2	26908.6	25498.6	20700.8	25431.6	51196.1	43480.4	66593.1	114095	57434.8	130957	79610.3	40931.3	2.05392	1.03838	0.0423705
5-Oxohexanal	C6H10O2	34268.5	41824.2	35106.6	33477.2	26908.6	25498.6	20700.8	25431.6	51196.1	43480.4	66593.1	114095	57434.8	130957	79610.3	40931.3	2.05392	1.03838	0.0423705
gamma-caprolactone	C6H10O2	34268.5	41824.2	35106.6	33477.2	26908.6	25498.6	20700.8	25431.6	51196.1	43480.4	66593.1	114095	57434.8	130957	79610.3	40931.3	2.05392	1.03838	0.0423705
Prenyl formate	C6H10O2	34268.5	41824.2	35106.6	33477.2	26908.6	25498.6	20700.8	25431.6	51196.1	43480.4	66593.1	114095	57434.8	130957	79610.3	40931.3	2.05392	1.03838	0.0423705
2-Hydroxycyclohexan-1-one	C6H10O2	34268.5	41824.2	35106.6	33477.2	26908.6	25498.6	20700.8	25431.6	51196.1	43480.4	66593.1	114095	57434.8	130957	79610.3	40931.3	2.05392	1.03838	0.0423705
3-Hydroxycyclohexanone	C6H10O2	34268.5	41824.2	35106.6	33477.2	26908.6	25498.6	20700.8	25431.6	51196.1	43480.4	66593.1	114095	57434.8	130957	79610.3	40931.3	2.05392	1.03838	0.0423705
Pyroterebic acid	C6H10O2	34268.5	41824.2	35106.6	33477.2	26908.6	25498.6	20700.8	25431.6	51196.1	43480.4	66593.1	114095	57434.8	130957	79610.3	40931.3	2.05392	1.03838	0.0423705
2,2-dimethyl-3-butenoic acid	C6H10O2	34268.5	41824.2	35106.6	33477.2	26908.6	25498.6	20700.8	25431.6	51196.1	43480.4	66593.1	114095	57434.8	130957	79610.3	40931.3	2.05392	1.03838	0.0423705
4-methyl-4-pentenoic acid	C6H10O2	34268.5	41824.2	35106.6	33477.2	26908.6	25498.6	20700.8	25431.6	51196.1	43480.4	66593.1	114095	57434.8	130957	79610.3	40931.3	2.05392	1.03838	0.0423705
4-hydroxyhexenal	C6H10O2	34268.5	41824.2	35106.6	33477.2	26908.6	25498.6	20700.8	25431.6	51196.1	43480.4	66593.1	114095	57434.8	130957	79610.3	40931.3	2.05392	1.03838	0.0423705
Adipaldehyde	C6H10O2	34268.5	41824.2	35106.6	33477.2	26908.6	25498.6	20700.8	25431.6	51196.1	43480.4	66593.1	114095	57434.8	130957	79610.3	40931.3	2.05392	1.03838	0.0423705
2,5-Hexanedione	C6H10O2	34268.5	41824.2	35106.6	33477.2	26908.6	25498.6	20700.8	25431.6	51196.1	43480.4	66593.1	114095	57434.8	130957	79610.3	40931.3	2.05392	1.03838	0.0423705
2Z-Hexenoic acid	C6H10O2	34268.5	41824.2	35106.6	33477.2	26908.6	25498.6	20700.8	25431.6	51196.1	43480.4	66593.1	114095	57434.8	130957	79610.3	40931.3	2.05392	1.03838	0.0423705
gamma-hexenoic acid	C6H10O2	34268.5	41824.2	35106.6	33477.2	26908.6	25498.6	20700.8	25431.6	51196.1	43480.4	66593.1	114095	57434.8	130957	79610.3	40931.3	2.05392	1.03838	0.0423705
Hydrosorbic acid	C6H10O2	34268.5	41824.2	35106.6	33477.2	26908.6	25498.6	20700.8	25431.6	51196.1	43480.4	66593.1	114095	57434.8	130957	79610.3	40931.3	2.05392	1.03838	0.0423705
delta-hexenoic acid	C6H10O2	34268.5	41824.2	35106.6	33477.2	26908.6	25498.6	20700.8	25431.6	51196.1	43480.4	66593.1	114095	57434.8	130957	79610.3	40931.3	2.05392	1.03838	0.0423705
trimethyl acrylic acid	C6H10O2	34268.5	41824.2	35106.6	33477.2	26908.6	25498.6	20700.8	25431.6	51196.1	43480.4	66593.1	114095	57434.8	130957	79610.3	40931.3	2.05392	1.03838	0.0423705
3-Methyl-3Z-Pentenoic Acid	C6H10O2	34268.5	41824.2	35106.6	33477.2	26908.6	25498.6	20700.8	25431.6	51196.1	43480.4	66593.1	114095	57434.8	130957	79610.3	40931.3	2.05392	1.03838	0.0423705
3-isopropyl acrylic acid	C6H10O2	34268.5	41824.2	35106.6	33477.2	26908.6	25498.6	20700.8	25431.6	51196.1	43480.4	66593.1	114095	57434.8	130957	79610.3	40931.3	2.05392	1.03838	0.0423705
3-methyl-2Z-pentenoic acid	C6H10O2	34268.5	41824.2	35106.6	33477.2	26908.6	25498.6	20700.8	25431.6	51196.1	43480.4	66593.1	114095	57434.8	130957	79610.3	40931.3	2.05392	1.03838	0.0423705
3-methyl-4-pentenoic acid	C6H10O2	34268.5	41824.2	35106.6	33477.2	26908.6	25498.6	20700.8	25431.6	51196.1	43480.4	66593.1	114095	57434.8	130957	79610.3	40931.3	2.05392	1.03838	0.0423705
Caproic acid	C6H12O2	2.28202e+06	2.44802e+06	2.67102e+06	2.37729e+06	1.93155e+06	2.6323e+06	2.47014e+06	2.29271e+06	5.28788e+06	8102586	5.45059e+06	5136677	5261508	5.85648e+06	7194426	4609864	2.22545	1.1541	0.000612838
Isocaproic acid	C6H12O2	2.28202e+06	2.44802e+06	2.67102e+06	2.37729e+06	1.93155e+06	2.6323e+06	2.47014e+06	2.29271e+06	5.28788e+06	8102586	5.45059e+06	5136677	5261508	5.85648e+06	7194426	4609864	2.22545	1.1541	0.000612838
Isoamyl formate	C6H12O2	2.28202e+06	2.44802e+06	2.67102e+06	2.37729e+06	1.93155e+06	2.6323e+06	2.47014e+06	2.29271e+06	5.28788e+06	8102586	5.45059e+06	5136677	5261508	5.85648e+06	7194426	4609864	2.22545	1.1541	0.000612838
3-methyl valeric acid	C6H12O2	2.28202e+06	2.44802e+06	2.67102e+06	2.37729e+06	1.93155e+06	2.6323e+06	2.47014e+06	2.29271e+06	5.28788e+06	8102586	5.45059e+06	5136677	5261508	5.85648e+06	7194426	4609864	2.22545	1.1541	0.000612838
Ethyl butyrate	C6H12O2	2.28202e+06	2.44802e+06	2.67102e+06	2.37729e+06	1.93155e+06	2.6323e+06	2.47014e+06	2.29271e+06	5.28788e+06	8102586	5.45059e+06	5136677	5261508	5.85648e+06	7194426	4609864	2.22545	1.1541	0.000612838
Methyl (S)-2-Methylbutanoate	C6H12O2	2.28202e+06	2.44802e+06	2.67102e+06	2.37729e+06	1.93155e+06	2.6323e+06	2.47014e+06	2.29271e+06	5.28788e+06	8102586	5.45059e+06	5136677	5261508	5.85648e+06	7194426	4609864	2.22545	1.1541	0.000612838
Pentyl formate	C6H12O2	2.28202e+06	2.44802e+06	2.67102e+06	2.37729e+06	1.93155e+06	2.6323e+06	2.47014e+06	2.29271e+06	5.28788e+06	8102586	5.45059e+06	5136677	5261508	5.85648e+06	7194426	4609864	2.22545	1.1541	0.000612838
2,4,5-Trimethyl-1,3-dioxolane	C6H12O2	2.28202e+06	2.44802e+06	2.67102e+06	2.37729e+06	1.93155e+06	2.6323e+06	2.47014e+06	2.29271e+06	5.28788e+06	8102586	5.45059e+06	5136677	5261508	5.85648e+06	7194426	4609864	2.22545	1.1541	0.000612838
Methyl 3-methylbutanoate	C6H12O2	2.28202e+06	2.44802e+06	2.67102e+06	2.37729e+06	1.93155e+06	2.6323e+06	2.47014e+06	2.29271e+06	5.28788e+06	8102586	5.45059e+06	5136677	5261508	5.85648e+06	7194426	4609864	2.22545	1.1541	0.000612838
propyl propionate	C6H12O2	2.28202e+06	2.44802e+06	2.67102e+06	2.37729e+06	1.93155e+06	2.6323e+06	2.47014e+06	2.29271e+06	5.28788e+06	8102586	5.45059e+06	5136677	5261508	5.85648e+06	7194426	4609864	2.22545	1.1541	0.000612838
Isopropyl propionate	C6H12O2	2.28202e+06	2.44802e+06	2.67102e+06	2.37729e+06	1.93155e+06	2.6323e+06	2.47014e+06	2.29271e+06	5.28788e+06	8102586	5.45059e+06	5136677	5261508	5.85648e+06	7194426	4609864	2.22545	1.1541	0.000612838
2-methyl valeric acid	C6H12O2	2.28202e+06	2.44802e+06	2.67102e+06	2.37729e+06	1.93155e+06	2.6323e+06	2.47014e+06	2.29271e+06	5.28788e+06	8102586	5.45059e+06	5136677	5261508	5.85648e+06	7194426	4609864	2.22545	1.1541	0.000612838
ethyl 2-methyl-propionyl	C6H12O2	2.28202e+06	2.44802e+06	2.67102e+06	2.37729e+06	1.93155e+06	2.6323e+06	2.47014e+06	2.29271e+06	5.28788e+06	8102586	5.45059e+06	5136677	5261508	5.85648e+06	7194426	4609864	2.22545	1.1541	0.000612838
2-Methylpropyl acetate	C6H12O2	2.28202e+06	2.44802e+06	2.67102e+06	2.37729e+06	1.93155e+06	2.6323e+06	2.47014e+06	2.29271e+06	5.28788e+06	8102586	5.45059e+06	5136677	5261508	5.85648e+06	7194426	4609864	2.22545	1.1541	0.000612838
Methyl pentanoate	C6H12O2	2.28202e+06	2.44802e+06	2.67102e+06	2.37729e+06	1.93155e+06	2.6323e+06	2.47014e+06	2.29271e+06	5.28788e+06	8102586	5.45059e+06	5136677	5261508	5.85648e+06	7194426	4609864	2.22545	1.1541	0.000612838
diethyl acetic acid	C6H12O2	2.28202e+06	2.44802e+06	2.67102e+06	2.37729e+06	1.93155e+06	2.6323e+06	2.47014e+06	2.29271e+06	5.28788e+06	8102586	5.45059e+06	5136677	5261508	5.85648e+06	7194426	4609864	2.22545	1.1541	0.000612838
n-Butyl acetate	C6H12O2	2.28202e+06	2.44802e+06	2.67102e+06	2.37729e+06	1.93155e+06	2.6323e+06	2.47014e+06	2.29271e+06	5.28788e+06	8102586	5.45059e+06	5136677	5261508	5.85648e+06	7194426	4609864	2.22545	1.1541	0.000612838
4-Hydroxy-4-methylpentan-2-one	C6H12O2	2.28202e+06	2.44802e+06	2.67102e+06	2.37729e+06	1.93155e+06	2.6323e+06	2.47014e+06	2.29271e+06	5.28788e+06	8102586	5.45059e+06	5136677	5261508	5.85648e+06	7194426	4609864	2.22545	1.1541	0.000612838
2,2,4-Trimethyl-1,3-dioxolane	C6H12O2	2.28202e+06	2.44802e+06	2.67102e+06	2.37729e+06	1.93155e+06	2.6323e+06	2.47014e+06	2.29271e+06	5.28788e+06	8102586	5.45059e+06	5136677	5261508	5.85648e+06	7194426	4609864	2.22545	1.1541	0.000612838
cis-1,2-Cyclohexanediol	C6H12O2	2.28202e+06	2.44802e+06	2.67102e+06	2.37729e+06	1.93155e+06	2.6323e+06	2.47014e+06	2.29271e+06	5.28788e+06	8102586	5.45059e+06	5136677	5261508	5.85648e+06	7194426	4609864	2.22545	1.1541	0.000612838
4-Hydroxyhexan-3-one	C6H12O2	2.28202e+06	2.44802e+06	2.67102e+06	2.37729e+06	1.93155e+06	2.6323e+06	2.47014e+06	2.29271e+06	5.28788e+06	8102586	5.45059e+06	5136677	5261508	5.85648e+06	7194426	4609864	2.22545	1.1541	0.000612838
trans-1,2-Cyclohexanediol	C6H12O2	2.28202e+06	2.44802e+06	2.67102e+06	2.37729e+06	1.93155e+06	2.6323e+06	2.47014e+06	2.29271e+06	5.28788e+06	8102586	5.45059e+06	5136677	5261508	5.85648e+06	7194426	4609864	2.22545	1.1541	0.000612838
3-Hydroxyhexanal	C6H12O2	2.28202e+06	2.44802e+06	2.67102e+06	2.37729e+06	1.93155e+06	2.6323e+06	2.47014e+06	2.29271e+06	5.28788e+06	8102586	5.45059e+06	5136677	5261508	5.85648e+06	7194426	4609864	2.22545	1.1541	0.000612838
3,3-dimethyl-butanoic acid	C6H12O2	2.28202e+06	2.44802e+06	2.67102e+06	2.37729e+06	1.93155e+06	2.6323e+06	2.47014e+06	2.29271e+06	5.28788e+06	8102586	5.45059e+06	5136677	5261508	5.85648e+06	7194426	4609864	2.22545	1.1541	0.000612838
dimethyl ethyl acetic acid	C6H12O2	2.28202e+06	2.44802e+06	2.67102e+06	2.37729e+06	1.93155e+06	2.6323e+06	2.47014e+06	2.29271e+06	5.28788e+06	8102586	5.45059e+06	5136677	5261508	5.85648e+06	7194426	4609864	2.22545	1.1541	0.000612838
2-hydroxy caproaldehyde	C6H12O2	2.28202e+06	2.44802e+06	2.67102e+06	2.37729e+06	1.93155e+06	2.6323e+06	2.47014e+06	2.29271e+06	5.28788e+06	8102586	5.45059e+06	5136677	5261508	5.85648e+06	7194426	4609864	2.22545	1.1541	0.000612838
4-hydroxy caproaldehyde	C6H12O2	2.28202e+06	2.44802e+06	2.67102e+06	2.37729e+06	1.93155e+06	2.6323e+06	2.47014e+06	2.29271e+06	5.28788e+06	8102586	5.45059e+06	5136677	5261508	5.85648e+06	7194426	4609864	2.22545	1.1541	0.000612838
5-hydroxy caproaldehyde	C6H12O2	2.28202e+06	2.44802e+06	2.67102e+06	2.37729e+06	1.93155e+06	2.6323e+06	2.47014e+06	2.29271e+06	5.28788e+06	8102586	5.45059e+06	5136677	5261508	5.85648e+06	7194426	4609864	2.22545	1.1541	0.000612838
6-hydroxy caproaldehyde	C6H12O2	2.28202e+06	2.44802e+06	2.67102e+06	2.37729e+06	1.93155e+06	2.6323e+06	2.47014e+06	2.29271e+06	5.28788e+06	8102586	5.45059e+06	5136677	5261508	5.85648e+06	7194426	4609864	2.22545	1.1541	0.000612838
2S-Hydroxyhexan-3-one	C6H12O2	2.28202e+06	2.44802e+06	2.67102e+06	2.37729e+06	1.93155e+06	2.6323e+06	2.47014e+06	2.29271e+06	5.28788e+06	8102586	5.45059e+06	5136677	5261508	5.85648e+06	7194426	4609864	2.22545	1.1541	0.000612838
3R-Hydroxyhexan-2-one	C6H12O2	2.28202e+06	2.44802e+06	2.67102e+06	2.37729e+06	1.93155e+06	2.6323e+06	2.47014e+06	2.29271e+06	5.28788e+06	8102586	5.45059e+06	5136677	5261508	5.85648e+06	7194426	4609864	2.22545	1.1541	0.000612838
3S-Hydroxyhexan-2-one	C6H12O2	2.28202e+06	2.44802e+06	2.67102e+06	2.37729e+06	1.93155e+06	2.6323e+06	2.47014e+06	2.29271e+06	5.28788e+06	8102586	5.45059e+06	5136677	5261508	5.85648e+06	7194426	4609864	2.22545	1.1541	0.000612838
2-Hydroxyhexan-3-one	C6H12O2	2.28202e+06	2.44802e+06	2.67102e+06	2.37729e+06	1.93155e+06	2.6323e+06	2.47014e+06	2.29271e+06	5.28788e+06	8102586	5.45059e+06	5136677	5261508	5.85648e+06	7194426	4609864	2.22545	1.1541	0.000612838
Glycerol	C3H8O3	2.57004e+06	2.52627e+06	2.48584e+06	2.78661e+06	1.5583e+06	2.00842e+06	2.69406e+06	2.83248e+06	6831053	8211576	8817970	6948790	7520004	6.45105e+06	7662816	7.65679e+06	2.978	1.57434	4.0185e-06

## Sheet: 10pre-S vs. 10pre-C
List of significant metabolites based on fc and q values between 10pre-S vs. 10pre-C
Name	Formula	10pre-C1	10pre-C2	10pre-C3	10pre-C4	10pre-C5	10pre-C6	10pre-C7	10pre-C8	10pre-S1	10pre-S2	10pre-S3	10pre-S4	10pre-S5	10pre-S6	10pre-S7	10pre-S8	FC.10PP	LOG.10PP	q
N,2,3-Trimethyl-2-(1-methylethyl)butanamide	C10H21NO	140045	154951	169666	133161	127825	202686	140809	137802	915775	548852	598446	770242	518625	685170	810226	815548	5.18209	2.37354	0.000331829
decanamide	C10H21NO	140045	154951	169666	133161	127825	202686	140809	137802	915775	548852	598446	770242	518625	685170	810226	815548	5.18209	2.37354	0.000331829
Diisopropyl phosphate	C6H15O4P	31810.1	32943	40861.3	38580.8	29965.4	30956.5	77548.9	22871.8	131058	108088	59887.7	98187.3	71255.7	70368.1	75695.3	98931.4	2.68531	1.42509	0.00306296
Diethanolamine	C4H11NO2	174649	211867	237393	150283	186276	191175	218679	238601	691947	324071	822666	261409	217467	662672	639525	631730	3.15415	1.65725	0.0331908
2-Amino-2-methyl-1,3-propandiol	C4H11NO2	174649	211867	237393	150283	186276	191175	218679	238601	691947	324071	822666	261409	217467	662672	639525	631730	3.15415	1.65725	0.0331908
Caproic acid	C6H12O2	2.73045e+06	2.28869e+06	1.81642e+06	2.91286e+06	2123246	2.36444e+06	3.60295e+06	1.21265e+06	5.51374e+06	5.88861e+06	7103756	7120424	10421999	6.05477e+06	5.3355e+06	5.7396e+06	2.56674	1.35994	0.0014674
Isocaproic acid	C6H12O2	2.73045e+06	2.28869e+06	1.81642e+06	2.91286e+06	2123246	2.36444e+06	3.60295e+06	1.21265e+06	5.51374e+06	5.88861e+06	7103756	7120424	10421999	6.05477e+06	5.3355e+06	5.7396e+06	2.56674	1.35994	0.0014674
Isoamyl formate	C6H12O2	2.73045e+06	2.28869e+06	1.81642e+06	2.91286e+06	2123246	2.36444e+06	3.60295e+06	1.21265e+06	5.51374e+06	5.88861e+06	7103756	7120424	10421999	6.05477e+06	5.3355e+06	5.7396e+06	2.56674	1.35994	0.0014674
3-methyl valeric acid	C6H12O2	2.73045e+06	2.28869e+06	1.81642e+06	2.91286e+06	2123246	2.36444e+06	3.60295e+06	1.21265e+06	5.51374e+06	5.88861e+06	7103756	7120424	10421999	6.05477e+06	5.3355e+06	5.7396e+06	2.56674	1.35994	0.0014674
Ethyl butyrate	C6H12O2	2.73045e+06	2.28869e+06	1.81642e+06	2.91286e+06	2123246	2.36444e+06	3.60295e+06	1.21265e+06	5.51374e+06	5.88861e+06	7103756	7120424	10421999	6.05477e+06	5.3355e+06	5.7396e+06	2.56674	1.35994	0.0014674
Methyl (S)-2-Methylbutanoate	C6H12O2	2.73045e+06	2.28869e+06	1.81642e+06	2.91286e+06	2123246	2.36444e+06	3.60295e+06	1.21265e+06	5.51374e+06	5.88861e+06	7103756	7120424	10421999	6.05477e+06	5.3355e+06	5.7396e+06	2.56674	1.35994	0.0014674
Pentyl formate	C6H12O2	2.73045e+06	2.28869e+06	1.81642e+06	2.91286e+06	2123246	2.36444e+06	3.60295e+06	1.21265e+06	5.51374e+06	5.88861e+06	7103756	7120424	10421999	6.05477e+06	5.3355e+06	5.7396e+06	2.56674	1.35994	0.0014674
2,4,5-Trimethyl-1,3-dioxolane	C6H12O2	2.73045e+06	2.28869e+06	1.81642e+06	2.91286e+06	2123246	2.36444e+06	3.60295e+06	1.21265e+06	5.51374e+06	5.88861e+06	7103756	7120424	10421999	6.05477e+06	5.3355e+06	5.7396e+06	2.56674	1.35994	0.0014674
Methyl 3-methylbutanoate	C6H12O2	2.73045e+06	2.28869e+06	1.81642e+06	2.91286e+06	2123246	2.36444e+06	3.60295e+06	1.21265e+06	5.51374e+06	5.88861e+06	7103756	7120424	10421999	6.05477e+06	5.3355e+06	5.7396e+06	2.56674	1.35994	0.0014674
propyl propionate	C6H12O2	2.73045e+06	2.28869e+06	1.81642e+06	2.91286e+06	2123246	2.36444e+06	3.60295e+06	1.21265e+06	5.51374e+06	5.88861e+06	7103756	7120424	10421999	6.05477e+06	5.3355e+06	5.7396e+06	2.56674	1.35994	0.0014674
Isopropyl propionate	C6H12O2	2.73045e+06	2.28869e+06	1.81642e+06	2.91286e+06	2123246	2.36444e+06	3.60295e+06	1.21265e+06	5.51374e+06	5.88861e+06	7103756	7120424	10421999	6.05477e+06	5.3355e+06	5.7396e+06	2.56674	1.35994	0.0014674
2-methyl valeric acid	C6H12O2	2.73045e+06	2.28869e+06	1.81642e+06	2.91286e+06	2123246	2.36444e+06	3.60295e+06	1.21265e+06	5.51374e+06	5.88861e+06	7103756	7120424	10421999	6.05477e+06	5.3355e+06	5.7396e+06	2.56674	1.35994	0.0014674
ethyl 2-methyl-propionyl	C6H12O2	2.73045e+06	2.28869e+06	1.81642e+06	2.91286e+06	2123246	2.36444e+06	3.60295e+06	1.21265e+06	5.51374e+06	5.88861e+06	7103756	7120424	10421999	6.05477e+06	5.3355e+06	5.7396e+06	2.56674	1.35994	0.0014674
2-Methylpropyl acetate	C6H12O2	2.73045e+06	2.28869e+06	1.81642e+06	2.91286e+06	2123246	2.36444e+06	3.60295e+06	1.21265e+06	5.51374e+06	5.88861e+06	7103756	7120424	10421999	6.05477e+06	5.3355e+06	5.7396e+06	2.56674	1.35994	0.0014674
Methyl pentanoate	C6H12O2	2.73045e+06	2.28869e+06	1.81642e+06	2.91286e+06	2123246	2.36444e+06	3.60295e+06	1.21265e+06	5.51374e+06	5.88861e+06	7103756	7120424	10421999	6.05477e+06	5.3355e+06	5.7396e+06	2.56674	1.35994	0.0014674
diethyl acetic acid	C6H12O2	2.73045e+06	2.28869e+06	1.81642e+06	2.91286e+06	2123246	2.36444e+06	3.60295e+06	1.21265e+06	5.51374e+06	5.88861e+06	7103756	7120424	10421999	6.05477e+06	5.3355e+06	5.7396e+06	2.56674	1.35994	0.0014674
n-Butyl acetate	C6H12O2	2.73045e+06	2.28869e+06	1.81642e+06	2.91286e+06	2123246	2.36444e+06	3.60295e+06	1.21265e+06	5.51374e+06	5.88861e+06	7103756	7120424	10421999	6.05477e+06	5.3355e+06	5.7396e+06	2.56674	1.35994	0.0014674
4-Hydroxy-4-methylpentan-2-one	C6H12O2	2.73045e+06	2.28869e+06	1.81642e+06	2.91286e+06	2123246	2.36444e+06	3.60295e+06	1.21265e+06	5.51374e+06	5.88861e+06	7103756	7120424	10421999	6.05477e+06	5.3355e+06	5.7396e+06	2.56674	1.35994	0.0014674
2,2,4-Trimethyl-1,3-dioxolane	C6H12O2	2.73045e+06	2.28869e+06	1.81642e+06	2.91286e+06	2123246	2.36444e+06	3.60295e+06	1.21265e+06	5.51374e+06	5.88861e+06	7103756	7120424	10421999	6.05477e+06	5.3355e+06	5.7396e+06	2.56674	1.35994	0.0014674
cis-1,2-Cyclohexanediol	C6H12O2	2.73045e+06	2.28869e+06	1.81642e+06	2.91286e+06	2123246	2.36444e+06	3.60295e+06	1.21265e+06	5.51374e+06	5.88861e+06	7103756	7120424	10421999	6.05477e+06	5.3355e+06	5.7396e+06	2.56674	1.35994	0.0014674
4-Hydroxyhexan-3-one	C6H12O2	2.73045e+06	2.28869e+06	1.81642e+06	2.91286e+06	2123246	2.36444e+06	3.60295e+06	1.21265e+06	5.51374e+06	5.88861e+06	7103756	7120424	10421999	6.05477e+06	5.3355e+06	5.7396e+06	2.56674	1.35994	0.0014674
trans-1,2-Cyclohexanediol	C6H12O2	2.73045e+06	2.28869e+06	1.81642e+06	2.91286e+06	2123246	2.36444e+06	3.60295e+06	1.21265e+06	5.51374e+06	5.88861e+06	7103756	7120424	10421999	6.05477e+06	5.3355e+06	5.7396e+06	2.56674	1.35994	0.0014674
3-Hydroxyhexanal	C6H12O2	2.73045e+06	2.28869e+06	1.81642e+06	2.91286e+06	2123246	2.36444e+06	3.60295e+06	1.21265e+06	5.51374e+06	5.88861e+06	7103756	7120424	10421999	6.05477e+06	5.3355e+06	5.7396e+06	2.56674	1.35994	0.0014674
3,3-dimethyl-butanoic acid	C6H12O2	2.73045e+06	2.28869e+06	1.81642e+06	2.91286e+06	2123246	2.36444e+06	3.60295e+06	1.21265e+06	5.51374e+06	5.88861e+06	7103756	7120424	10421999	6.05477e+06	5.3355e+06	5.7396e+06	2.56674	1.35994	0.0014674
dimethyl ethyl acetic acid	C6H12O2	2.73045e+06	2.28869e+06	1.81642e+06	2.91286e+06	2123246	2.36444e+06	3.60295e+06	1.21265e+06	5.51374e+06	5.88861e+06	7103756	7120424	10421999	6.05477e+06	5.3355e+06	5.7396e+06	2.56674	1.35994	0.0014674
2-hydroxy caproaldehyde	C6H12O2	2.73045e+06	2.28869e+06	1.81642e+06	2.91286e+06	2123246	2.36444e+06	3.60295e+06	1.21265e+06	5.51374e+06	5.88861e+06	7103756	7120424	10421999	6.05477e+06	5.3355e+06	5.7396e+06	2.56674	1.35994	0.0014674
4-hydroxy caproaldehyde	C6H12O2	2.73045e+06	2.28869e+06	1.81642e+06	2.91286e+06	2123246	2.36444e+06	3.60295e+06	1.21265e+06	5.51374e+06	5.88861e+06	7103756	7120424	10421999	6.05477e+06	5.3355e+06	5.7396e+06	2.56674	1.35994	0.0014674
5-hydroxy caproaldehyde	C6H12O2	2.73045e+06	2.28869e+06	1.81642e+06	2.91286e+06	2123246	2.36444e+06	3.60295e+06	1.21265e+06	5.51374e+06	5.88861e+06	7103756	7120424	10421999	6.05477e+06	5.3355e+06	5.7396e+06	2.56674	1.35994	0.0014674
6-hydroxy caproaldehyde	C6H12O2	2.73045e+06	2.28869e+06	1.81642e+06	2.91286e+06	2123246	2.36444e+06	3.60295e+06	1.21265e+06	5.51374e+06	5.88861e+06	7103756	7120424	10421999	6.05477e+06	5.3355e+06	5.7396e+06	2.56674	1.35994	0.0014674
2S-Hydroxyhexan-3-one	C6H12O2	2.73045e+06	2.28869e+06	1.81642e+06	2.91286e+06	2123246	2.36444e+06	3.60295e+06	1.21265e+06	5.51374e+06	5.88861e+06	7103756	7120424	10421999	6.05477e+06	5.3355e+06	5.7396e+06	2.56674	1.35994	0.0014674
3R-Hydroxyhexan-2-one	C6H12O2	2.73045e+06	2.28869e+06	1.81642e+06	2.91286e+06	2123246	2.36444e+06	3.60295e+06	1.21265e+06	5.51374e+06	5.88861e+06	7103756	7120424	10421999	6.05477e+06	5.3355e+06	5.7396e+06	2.56674	1.35994	0.0014674
3S-Hydroxyhexan-2-one	C6H12O2	2.73045e+06	2.28869e+06	1.81642e+06	2.91286e+06	2123246	2.36444e+06	3.60295e+06	1.21265e+06	5.51374e+06	5.88861e+06	7103756	7120424	10421999	6.05477e+06	5.3355e+06	5.7396e+06	2.56674	1.35994	0.0014674
2-Hydroxyhexan-3-one	C6H12O2	2.73045e+06	2.28869e+06	1.81642e+06	2.91286e+06	2123246	2.36444e+06	3.60295e+06	1.21265e+06	5.51374e+06	5.88861e+06	7103756	7120424	10421999	6.05477e+06	5.3355e+06	5.7396e+06	2.56674	1.35994	0.0014674
Glycerol	C3H8O3	2860493	2116324	2733356	2452617	2.14083e+06	3.01942e+06	3.86756e+06	2.06091e+06	8865016	6.87015e+06	6494824	8950575	8.21372e+06	7.94242e+06	8058356	7.42973e+06	3.0854	1.62546	7.48916e-06
1,2,3-Tris(1-ethoxyethoxy)propane	C15H32O6	1.1793e+06	808538	1.5429e+06	955056	734891	1.23866e+06	1.61551e+06	881384	105242	43804.4	455419	0	93130.2	68948.9	153072	270284	0.0929424	-3.42752	0.000733087
Acetyl tributyl citrate	C20H34O8	442160	684664	842826	438653	269407	662543	462171	417883	18335.1	82063	115786	6012.11	37826.7	58173.7	225209	121465	0.155072	-2.68899	0.00177389
5S-HETE di-endoperoxide	C20H34O8	442160	684664	842826	438653	269407	662543	462171	417883	18335.1	82063	115786	6012.11	37826.7	58173.7	225209	121465	0.155072	-2.68899	0.00177389
Methyprylon	C10H17NO2	282126	225187	265967	273892	161012	194084	425643	170219	131909	81753.1	151907	89117.3	80372.3	70635.1	194948	110864	0.407165	-1.29631	0.0174277
Acetyltropine	C10H17NO2	282126	225187	265967	273892	161012	194084	425643	170219	131909	81753.1	151907	89117.3	80372.3	70635.1	194948	110864	0.407165	-1.29631	0.0174277
Elaeokanine C	C12H21NO2	286833	393720	274649	335871	255686	355275	568432	322966	180397	87293.2	263080	51659.8	138732	76090.9	374878	142132	0.426302	-1.23005	0.0243903
N-Hexadecanoylpyrrolidine	C20H39NO	336942	411299	494802	441787	299656	520340	531811	269162	288304	42200.7	254918	113426	194595	73686.6	203116	287188	0.466203	-1.10097	0.00365106
4,5-Dihydrovomifoliol	C13H22O3	242098	195163	199292	187099	218183	314651	217857	122468	89239.4	82964.2	87086.3	64626.7	69106.2	79399.4	113050	93114.1	0.407649	-1.2946	0.00207374
Methyl dihydrojasmonate	C13H22O3	242098	195163	199292	187099	218183	314651	217857	122468	89239.4	82964.2	87086.3	64626.7	69106.2	79399.4	113050	93114.1	0.407649	-1.2946	0.00207374
Riesling acetal	C13H22O3	242098	195163	199292	187099	218183	314651	217857	122468	89239.4	82964.2	87086.3	64626.7	69106.2	79399.4	113050	93114.1	0.407649	-1.2946	0.00207374
12-amino-dodecanoic acid	C12H25NO2	203103	351062	371852	231806	189690	265750	326379	157376	166154	52967	177625	40453.5	106934	66615.6	176762	139326	0.494939	-1.01468	0.00968227
Hydroxyvalerylcarnitine	C12H25NO5	68590.5	107675	88940.8	71345.8	76464.4	73004.4	84139.6	64713	40497.7	30669.2	32206.4	25942	33364.6	24540.2	31852	25452.9	0.41829	-1.25743	0.000291109
O-glutaroyl-L-carnitine	C12H21NO6	64526.4	105408	40488.7	53210.1	49317.7	91292.4	56845.3	40920.5	29810.9	21883.5	29178.1	18935.7	19790.7	15031.1	17436.2	18728.5	0.351881	-1.50684	0.0130174
Glutarylcarnitine	C12H21NO6	64526.4	105408	40488.7	53210.1	49317.7	91292.4	56845.3	40920.5	29810.9	21883.5	29178.1	18935.7	19790.7	15031.1	17436.2	18728.5	0.351881	-1.50684	0.0130174
Pantothenol	C9H19NO4	67400.4	48250.1	33740.8	60992.9	49114.9	32903.5	67242.9	50923.6	14446.9	14445.6	50051.9	15048	11670.1	20063	16178.6	21506.1	0.312146	-1.67971	0.00305436
Pantothenol	C9H19NO4	67400.4	48250.1	33740.8	60992.9	49114.9	32903.5	67242.9	50923.6	14446.9	14445.6	50051.9	15048	11670.1	20063	16178.6	21506.1	0.312146	-1.67971	0.00305436
2-Hexenoylcarnitine	C13H23NO4	174383	104730	76356.1	176725	84866.1	166585	134965	74936	39421.9	27322.5	53726.5	20714.9	20882.6	24821.8	43639.6	33415.4	0.253396	-1.98053	0.00496913
Cuscohygrine	C13H24N2O	28804.6	25434.7	50197.1	49551.8	48093.9	35572.7	81142	55451.7	19414.4	0	0	0	23076.8	27027.8	47666.8	24400.1	0.435157	-1.20039	0.0343653
L-(+)-Anaferine	C13H24N2O	28804.6	25434.7	50197.1	49551.8	48093.9	35572.7	81142	55451.7	19414.4	0	0	0	23076.8	27027.8	47666.8	24400.1	0.435157	-1.20039	0.0343653
D-(-)-Anaferine	C13H24N2O	28804.6	25434.7	50197.1	49551.8	48093.9	35572.7	81142	55451.7	19414.4	0	0	0	23076.8	27027.8	47666.8	24400.1	0.435157	-1.20039	0.0343653
2-(1-Propenyl)-delta1-piperideine	C8H13N	55838	54257	57509.6	46089.1	43852.5	51130.6	55581.4	44702.8	28437.7	28019.9	36493.8	14722.7	23654.2	23095.9	31309.2	24521.1	0.498551	-1.00419	5.57899e-05
Hydroxyhexanoycarnitine	C13H25NO5	54830.7	53486.3	45484.1	42135.2	66143.6	51958	48043.2	27664.2	34602	21770.3	30633.2	11883.3	15108.8	12510.5	35093	22433	0.442029	-1.17779	0.00231652
Serratamic acid	C13H25NO5	54830.7	53486.3	45484.1	42135.2	66143.6	51958	48043.2	27664.2	34602	21770.3	30633.2	11883.3	15108.8	12510.5	35093	22433	0.442029	-1.17779	0.00231652
Methotrimeprazine	C19H24N2OS	23579.7	12325.6	21777.3	13469.1	13641.4	23997.1	29396.7	14417.2	0	0	0	7156.7	12400	0	15441	5812.73	0.160597	-2.63848	0.00547381
2-decylenic acid	C10H18O2	503970	457144	413035	485976	370373	462660	608536	244537	231210	181746	183962	171513	183627	139208	170995	160469	0.384059	-1.3806	0.00177389
3-Methyl-2,4-nonanedione	C10H18O2	503970	457144	413035	485976	370373	462660	608536	244537	231210	181746	183962	171513	183627	139208	170995	160469	0.384059	-1.3806	0.00177389
Cyclohexyl butanoate	C10H18O2	503970	457144	413035	485976	370373	462660	608536	244537	231210	181746	183962	171513	183627	139208	170995	160469	0.384059	-1.3806	0.00177389
(E)-2-Hexenyl butyrate	C10H18O2	503970	457144	413035	485976	370373	462660	608536	244537	231210	181746	183962	171513	183627	139208	170995	160469	0.384059	-1.3806	0.00177389
9-Hydroxygeraniol	C10H18O2	503970	457144	413035	485976	370373	462660	608536	244537	231210	181746	183962	171513	183627	139208	170995	160469	0.384059	-1.3806	0.00177389
4Z-decenoic acid	C10H18O2	503970	457144	413035	485976	370373	462660	608536	244537	231210	181746	183962	171513	183627	139208	170995	160469	0.384059	-1.3806	0.00177389
9-Decenoic acid	C10H18O2	503970	457144	413035	485976	370373	462660	608536	244537	231210	181746	183962	171513	183627	139208	170995	160469	0.384059	-1.3806	0.00177389
3Z-decenoic acid	C10H18O2	503970	457144	413035	485976	370373	462660	608536	244537	231210	181746	183962	171513	183627	139208	170995	160469	0.384059	-1.3806	0.00177389
6-endo-hydroxycineole	C10H18O2	503970	457144	413035	485976	370373	462660	608536	244537	231210	181746	183962	171513	183627	139208	170995	160469	0.384059	-1.3806	0.00177389
Linalyl oxide	C10H18O2	503970	457144	413035	485976	370373	462660	608536	244537	231210	181746	183962	171513	183627	139208	170995	160469	0.384059	-1.3806	0.00177389
(E)-3-(Tetrahydro-5,5-dimethyl-2-furanyl)-2-buten-1-ol	C10H18O2	503970	457144	413035	485976	370373	462660	608536	244537	231210	181746	183962	171513	183627	139208	170995	160469	0.384059	-1.3806	0.00177389
Citronellic acid	C10H18O2	503970	457144	413035	485976	370373	462660	608536	244537	231210	181746	183962	171513	183627	139208	170995	160469	0.384059	-1.3806	0.00177389
2-exo-Hydroxy-1,8-cineole	C10H18O2	503970	457144	413035	485976	370373	462660	608536	244537	231210	181746	183962	171513	183627	139208	170995	160469	0.384059	-1.3806	0.00177389
(S,E)-2,6-Dimethyl-5,7-octadiene-2,3-diol	C10H18O2	503970	457144	413035	485976	370373	462660	608536	244537	231210	181746	183962	171513	183627	139208	170995	160469	0.384059	-1.3806	0.00177389
Cnidiol C	C10H18O2	503970	457144	413035	485976	370373	462660	608536	244537	231210	181746	183962	171513	183627	139208	170995	160469	0.384059	-1.3806	0.00177389
Isopentyl 3-methyl-2-butenoate	C10H18O2	503970	457144	413035	485976	370373	462660	608536	244537	231210	181746	183962	171513	183627	139208	170995	160469	0.384059	-1.3806	0.00177389
5-Decenoic acid	C10H18O2	503970	457144	413035	485976	370373	462660	608536	244537	231210	181746	183962	171513	183627	139208	170995	160469	0.384059	-1.3806	0.00177389
(±)-cis-Linalyl oxide	C10H18O2	503970	457144	413035	485976	370373	462660	608536	244537	231210	181746	183962	171513	183627	139208	170995	160469	0.384059	-1.3806	0.00177389
(±)-trans-Linalyl oxide	C10H18O2	503970	457144	413035	485976	370373	462660	608536	244537	231210	181746	183962	171513	183627	139208	170995	160469	0.384059	-1.3806	0.00177389
Ethyl 4Z-octenoate	C10H18O2	503970	457144	413035	485976	370373	462660	608536	244537	231210	181746	183962	171513	183627	139208	170995	160469	0.384059	-1.3806	0.00177389
(+)-6-Hydroxy-2,6-dimethyl-7-octen-4-one	C10H18O2	503970	457144	413035	485976	370373	462660	608536	244537	231210	181746	183962	171513	183627	139208	170995	160469	0.384059	-1.3806	0.00177389
Methyl (xi)-3-nonenoate	C10H18O2	503970	457144	413035	485976	370373	462660	608536	244537	231210	181746	183962	171513	183627	139208	170995	160469	0.384059	-1.3806	0.00177389
3Z-Hexenyl isobutyrate	C10H18O2	503970	457144	413035	485976	370373	462660	608536	244537	231210	181746	183962	171513	183627	139208	170995	160469	0.384059	-1.3806	0.00177389
2-Propenyl heptanoate	C10H18O2	503970	457144	413035	485976	370373	462660	608536	244537	231210	181746	183962	171513	183627	139208	170995	160469	0.384059	-1.3806	0.00177389
Methyl 2-nonenoate	C10H18O2	503970	457144	413035	485976	370373	462660	608536	244537	231210	181746	183962	171513	183627	139208	170995	160469	0.384059	-1.3806	0.00177389
Menthone lactone	C10H18O2	503970	457144	413035	485976	370373	462660	608536	244537	231210	181746	183962	171513	183627	139208	170995	160469	0.384059	-1.3806	0.00177389
5Z-Octenyl acetate	C10H18O2	503970	457144	413035	485976	370373	462660	608536	244537	231210	181746	183962	171513	183627	139208	170995	160469	0.384059	-1.3806	0.00177389
(±)-6-Methyl-5-hepten-2-yl acetate	C10H18O2	503970	457144	413035	485976	370373	462660	608536	244537	231210	181746	183962	171513	183627	139208	170995	160469	0.384059	-1.3806	0.00177389
4-Hydroxy-2,6-dimethyl-7-octen-3-one	C10H18O2	503970	457144	413035	485976	370373	462660	608536	244537	231210	181746	183962	171513	183627	139208	170995	160469	0.384059	-1.3806	0.00177389
ethyl 3E-octenoate	C10H18O2	503970	457144	413035	485976	370373	462660	608536	244537	231210	181746	183962	171513	183627	139208	170995	160469	0.384059	-1.3806	0.00177389
2-Methylbutyl 3-methyl-2-butenoate	C10H18O2	503970	457144	413035	485976	370373	462660	608536	244537	231210	181746	183962	171513	183627	139208	170995	160469	0.384059	-1.3806	0.00177389
2,6-Dimethyl-3,7-octadiene-2,6-diol	C10H18O2	503970	457144	413035	485976	370373	462660	608536	244537	231210	181746	183962	171513	183627	139208	170995	160469	0.384059	-1.3806	0.00177389
1-Cyclopropyl-4-methyl-1,3-cyclohexanediol	C10H18O2	503970	457144	413035	485976	370373	462660	608536	244537	231210	181746	183962	171513	183627	139208	170995	160469	0.384059	-1.3806	0.00177389
Lilac alcohol	C10H18O2	503970	457144	413035	485976	370373	462660	608536	244537	231210	181746	183962	171513	183627	139208	170995	160469	0.384059	-1.3806	0.00177389
8-Methylnonenoate	C10H18O2	503970	457144	413035	485976	370373	462660	608536	244537	231210	181746	183962	171513	183627	139208	170995	160469	0.384059	-1.3806	0.00177389
Hexyl crotonate	C10H18O2	503970	457144	413035	485976	370373	462660	608536	244537	231210	181746	183962	171513	183627	139208	170995	160469	0.384059	-1.3806	0.00177389
Linalool oxide III	C10H18O2	503970	457144	413035	485976	370373	462660	608536	244537	231210	181746	183962	171513	183627	139208	170995	160469	0.384059	-1.3806	0.00177389
6-Decenoic acid	C10H18O2	503970	457144	413035	485976	370373	462660	608536	244537	231210	181746	183962	171513	183627	139208	170995	160469	0.384059	-1.3806	0.00177389
2-Octenyl acetate	C10H18O2	503970	457144	413035	485976	370373	462660	608536	244537	231210	181746	183962	171513	183627	139208	170995	160469	0.384059	-1.3806	0.00177389
Cyclohexylethyl acetate	C10H18O2	503970	457144	413035	485976	370373	462660	608536	244537	231210	181746	183962	171513	183627	139208	170995	160469	0.384059	-1.3806	0.00177389
Linalool oxide (trans-pyranoid)	C10H18O2	503970	457144	413035	485976	370373	462660	608536	244537	231210	181746	183962	171513	183627	139208	170995	160469	0.384059	-1.3806	0.00177389
3Z-Hexenyl butyrate	C10H18O2	503970	457144	413035	485976	370373	462660	608536	244537	231210	181746	183962	171513	183627	139208	170995	160469	0.384059	-1.3806	0.00177389
6-Decanolide	C10H18O2	503970	457144	413035	485976	370373	462660	608536	244537	231210	181746	183962	171513	183627	139208	170995	160469	0.384059	-1.3806	0.00177389
Ethyl (E)-2-octenoate	C10H18O2	503970	457144	413035	485976	370373	462660	608536	244537	231210	181746	183962	171513	183627	139208	170995	160469	0.384059	-1.3806	0.00177389
xi-Tetrahydro-3-pentyl-2H-pyran-2-one	C10H18O2	503970	457144	413035	485976	370373	462660	608536	244537	231210	181746	183962	171513	183627	139208	170995	160469	0.384059	-1.3806	0.00177389
trans-p-Menth-2-ene-1,4-diol	C10H18O2	503970	457144	413035	485976	370373	462660	608536	244537	231210	181746	183962	171513	183627	139208	170995	160469	0.384059	-1.3806	0.00177389
Delta-decalactone	C10H18O2	503970	457144	413035	485976	370373	462660	608536	244537	231210	181746	183962	171513	183627	139208	170995	160469	0.384059	-1.3806	0.00177389
xi-5-Hexyldihydro-2(3H)-furanone	C10H18O2	503970	457144	413035	485976	370373	462660	608536	244537	231210	181746	183962	171513	183627	139208	170995	160469	0.384059	-1.3806	0.00177389
1-Octen-3-yl acetate	C10H18O2	503970	457144	413035	485976	370373	462660	608536	244537	231210	181746	183962	171513	183627	139208	170995	160469	0.384059	-1.3806	0.00177389
p-Menth-8-ene-1,2-diol	C10H18O2	503970	457144	413035	485976	370373	462660	608536	244537	231210	181746	183962	171513	183627	139208	170995	160469	0.384059	-1.3806	0.00177389
(4R,7S)-7-isopropyl-4-methyloxepan-2-one	C10H18O2	503970	457144	413035	485976	370373	462660	608536	244537	231210	181746	183962	171513	183627	139208	170995	160469	0.384059	-1.3806	0.00177389
(1R,2R,4S)-Limonene-1,2-diol	C10H18O2	503970	457144	413035	485976	370373	462660	608536	244537	231210	181746	183962	171513	183627	139208	170995	160469	0.384059	-1.3806	0.00177389
Limonene-1,2-diol	C10H18O2	503970	457144	413035	485976	370373	462660	608536	244537	231210	181746	183962	171513	183627	139208	170995	160469	0.384059	-1.3806	0.00177389
(+)-Neomatatabiol	C10H18O2	503970	457144	413035	485976	370373	462660	608536	244537	231210	181746	183962	171513	183627	139208	170995	160469	0.384059	-1.3806	0.00177389
6-endo-Hydroxycineole	C10H18O2	503970	457144	413035	485976	370373	462660	608536	244537	231210	181746	183962	171513	183627	139208	170995	160469	0.384059	-1.3806	0.00177389
2,6-dimethyl-2E,7-octadiene-1,6-diol	C10H18O2	503970	457144	413035	485976	370373	462660	608536	244537	231210	181746	183962	171513	183627	139208	170995	160469	0.384059	-1.3806	0.00177389
(6E)-8-Hydroxygeraniol	C10H18O2	503970	457144	413035	485976	370373	462660	608536	244537	231210	181746	183962	171513	183627	139208	170995	160469	0.384059	-1.3806	0.00177389
2E-Octenyl acetate	C10H18O2	503970	457144	413035	485976	370373	462660	608536	244537	231210	181746	183962	171513	183627	139208	170995	160469	0.384059	-1.3806	0.00177389
3Z-Octenyl acetate	C10H18O2	503970	457144	413035	485976	370373	462660	608536	244537	231210	181746	183962	171513	183627	139208	170995	160469	0.384059	-1.3806	0.00177389
formyl 6E-nonenoate	C10H18O2	503970	457144	413035	485976	370373	462660	608536	244537	231210	181746	183962	171513	183627	139208	170995	160469	0.384059	-1.3806	0.00177389
ethyl 4Z-octenoate	C10H18O2	503970	457144	413035	485976	370373	462660	608536	244537	231210	181746	183962	171513	183627	139208	170995	160469	0.384059	-1.3806	0.00177389
1,7-Dioxaspiro[5.6]dodecane	C10H18O2	503970	457144	413035	485976	370373	462660	608536	244537	231210	181746	183962	171513	183627	139208	170995	160469	0.384059	-1.3806	0.00177389
2-Methyl-1,7-dioxaspiro[5.5]undecane	C10H18O2	503970	457144	413035	485976	370373	462660	608536	244537	231210	181746	183962	171513	183627	139208	170995	160469	0.384059	-1.3806	0.00177389
(4R,7R)-7-isopropyl-4-methyloxepan-2-one	C10H18O2	503970	457144	413035	485976	370373	462660	608536	244537	231210	181746	183962	171513	183627	139208	170995	160469	0.384059	-1.3806	0.00177389
10-Methyloxecan-2-one	C10H18O2	503970	457144	413035	485976	370373	462660	608536	244537	231210	181746	183962	171513	183627	139208	170995	160469	0.384059	-1.3806	0.00177389
(R)-gamma-Decalactone	C10H18O2	503970	457144	413035	485976	370373	462660	608536	244537	231210	181746	183962	171513	183627	139208	170995	160469	0.384059	-1.3806	0.00177389
2,3-Decanedione	C10H18O2	503970	457144	413035	485976	370373	462660	608536	244537	231210	181746	183962	171513	183627	139208	170995	160469	0.384059	-1.3806	0.00177389
cis-dec-2-enoic acid	C10H18O2	503970	457144	413035	485976	370373	462660	608536	244537	231210	181746	183962	171513	183627	139208	170995	160469	0.384059	-1.3806	0.00177389
Isodecenoic acid	C10H18O2	503970	457144	413035	485976	370373	462660	608536	244537	231210	181746	183962	171513	183627	139208	170995	160469	0.384059	-1.3806	0.00177389
Obtusilic acid	C10H18O2	503970	457144	413035	485976	370373	462660	608536	244537	231210	181746	183962	171513	183627	139208	170995	160469	0.384059	-1.3806	0.00177389
3-decylenic acid	C10H18O2	503970	457144	413035	485976	370373	462660	608536	244537	231210	181746	183962	171513	183627	139208	170995	160469	0.384059	-1.3806	0.00177389
3,7-dimethyl-2-octenoic acid	C10H18O2	503970	457144	413035	485976	370373	462660	608536	244537	231210	181746	183962	171513	183627	139208	170995	160469	0.384059	-1.3806	0.00177389
2,7-dimethyl-6-octenoic acid	C10H18O2	503970	457144	413035	485976	370373	462660	608536	244537	231210	181746	183962	171513	183627	139208	170995	160469	0.384059	-1.3806	0.00177389
3-methyl-2-nonenoic acid	C10H18O2	503970	457144	413035	485976	370373	462660	608536	244537	231210	181746	183962	171513	183627	139208	170995	160469	0.384059	-1.3806	0.00177389
D(-)-beta-hydroxy butyric acid	C4H8O3	1.1793e+06	808538	1.5429e+06	955056	734891	1.23866e+06	1.61551e+06	881384	105242	43804.4	455419	0	93130.2	68948.9	153072	270284	0.0929424	-3.42752	0.00862914
4-Methylnonanoic acid	C10H20O2	11121203	10087879	8976714	11839756	8963184	10683619	14898223	6.08635e+06	3.79552e+06	4814188	3.59266e+06	5.48434e+06	6.30423e+06	3009001	3998830	4.19279e+06	0.394368	-1.34238	0.00177389
Propyl heptanoate	C10H20O2	11121203	10087879	8976714	11839756	8963184	10683619	14898223	6.08635e+06	3.79552e+06	4814188	3.59266e+06	5.48434e+06	6.30423e+06	3009001	3998830	4.19279e+06	0.394368	-1.34238	0.00177389
Capric acid	C10H20O2	11121203	10087879	8976714	11839756	8963184	10683619	14898223	6.08635e+06	3.79552e+06	4814188	3.59266e+06	5.48434e+06	6.30423e+06	3009001	3998830	4.19279e+06	0.394368	-1.34238	0.00177389
Octyl acetate	C10H20O2	11121203	10087879	8976714	11839756	8963184	10683619	14898223	6.08635e+06	3.79552e+06	4814188	3.59266e+06	5.48434e+06	6.30423e+06	3009001	3998830	4.19279e+06	0.394368	-1.34238	0.00177389
(Z)-1-(1-Ethoxyethoxy)-3-hexene	C10H20O2	11121203	10087879	8976714	11839756	8963184	10683619	14898223	6.08635e+06	3.79552e+06	4814188	3.59266e+06	5.48434e+06	6.30423e+06	3009001	3998830	4.19279e+06	0.394368	-1.34238	0.00177389
2-Methylbutyl 3-methylbutanoate	C10H20O2	11121203	10087879	8976714	11839756	8963184	10683619	14898223	6.08635e+06	3.79552e+06	4814188	3.59266e+06	5.48434e+06	6.30423e+06	3009001	3998830	4.19279e+06	0.394368	-1.34238	0.00177389
trans-p-Menthane-1,8-diol	C10H20O2	11121203	10087879	8976714	11839756	8963184	10683619	14898223	6.08635e+06	3.79552e+06	4814188	3.59266e+06	5.48434e+06	6.30423e+06	3009001	3998830	4.19279e+06	0.394368	-1.34238	0.00177389
(1R,2S,3S,4R)-p-Menthane-2,3-diol	C10H20O2	11121203	10087879	8976714	11839756	8963184	10683619	14898223	6.08635e+06	3.79552e+06	4814188	3.59266e+06	5.48434e+06	6.30423e+06	3009001	3998830	4.19279e+06	0.394368	-1.34238	0.00177389
3-Methylbutyl pentanoate	C10H20O2	11121203	10087879	8976714	11839756	8963184	10683619	14898223	6.08635e+06	3.79552e+06	4814188	3.59266e+06	5.48434e+06	6.30423e+06	3009001	3998830	4.19279e+06	0.394368	-1.34238	0.00177389
1,1-Diethoxy-2-hexene	C10H20O2	11121203	10087879	8976714	11839756	8963184	10683619	14898223	6.08635e+06	3.79552e+06	4814188	3.59266e+06	5.48434e+06	6.30423e+06	3009001	3998830	4.19279e+06	0.394368	-1.34238	0.00177389
butyl hexanoate	C10H20O2	11121203	10087879	8976714	11839756	8963184	10683619	14898223	6.08635e+06	3.79552e+06	4814188	3.59266e+06	5.48434e+06	6.30423e+06	3009001	3998830	4.19279e+06	0.394368	-1.34238	0.00177389
2-Methylbutyl 2-methylbutanoate	C10H20O2	11121203	10087879	8976714	11839756	8963184	10683619	14898223	6.08635e+06	3.79552e+06	4814188	3.59266e+06	5.48434e+06	6.30423e+06	3009001	3998830	4.19279e+06	0.394368	-1.34238	0.00177389
Ethyl octanoate	C10H20O2	11121203	10087879	8976714	11839756	8963184	10683619	14898223	6.08635e+06	3.79552e+06	4814188	3.59266e+06	5.48434e+06	6.30423e+06	3009001	3998830	4.19279e+06	0.394368	-1.34238	0.00177389
3-Methylbutyl 2-methylbutanoate	C10H20O2	11121203	10087879	8976714	11839756	8963184	10683619	14898223	6.08635e+06	3.79552e+06	4814188	3.59266e+06	5.48434e+06	6.30423e+06	3009001	3998830	4.19279e+06	0.394368	-1.34238	0.00177389
(±)-3-Octyl acetate	C10H20O2	11121203	10087879	8976714	11839756	8963184	10683619	14898223	6.08635e+06	3.79552e+06	4814188	3.59266e+06	5.48434e+06	6.30423e+06	3009001	3998830	4.19279e+06	0.394368	-1.34238	0.00177389
Isoamyl isovalerate	C10H20O2	11121203	10087879	8976714	11839756	8963184	10683619	14898223	6.08635e+06	3.79552e+06	4814188	3.59266e+06	5.48434e+06	6.30423e+06	3009001	3998830	4.19279e+06	0.394368	-1.34238	0.00177389
Pentyl 3-methylbutanoate	C10H20O2	11121203	10087879	8976714	11839756	8963184	10683619	14898223	6.08635e+06	3.79552e+06	4814188	3.59266e+06	5.48434e+06	6.30423e+06	3009001	3998830	4.19279e+06	0.394368	-1.34238	0.00177389
Isooctyl acetate	C10H20O2	11121203	10087879	8976714	11839756	8963184	10683619	14898223	6.08635e+06	3.79552e+06	4814188	3.59266e+06	5.48434e+06	6.30423e+06	3009001	3998830	4.19279e+06	0.394368	-1.34238	0.00177389
Acetaldehyde 1,3-octanediol acetal	C10H20O2	11121203	10087879	8976714	11839756	8963184	10683619	14898223	6.08635e+06	3.79552e+06	4814188	3.59266e+06	5.48434e+06	6.30423e+06	3009001	3998830	4.19279e+06	0.394368	-1.34238	0.00177389
Ethyl 2-ethylhexanoate	C10H20O2	11121203	10087879	8976714	11839756	8963184	10683619	14898223	6.08635e+06	3.79552e+06	4814188	3.59266e+06	5.48434e+06	6.30423e+06	3009001	3998830	4.19279e+06	0.394368	-1.34238	0.00177389
Hexanal butane-2,3-diol acetal	C10H20O2	11121203	10087879	8976714	11839756	8963184	10683619	14898223	6.08635e+06	3.79552e+06	4814188	3.59266e+06	5.48434e+06	6.30423e+06	3009001	3998830	4.19279e+06	0.394368	-1.34238	0.00177389
Heptanal propyleneglycol acetal	C10H20O2	11121203	10087879	8976714	11839756	8963184	10683619	14898223	6.08635e+06	3.79552e+06	4814188	3.59266e+06	5.48434e+06	6.30423e+06	3009001	3998830	4.19279e+06	0.394368	-1.34238	0.00177389
(2S)-2-Ethylhexyl acetate	C10H20O2	11121203	10087879	8976714	11839756	8963184	10683619	14898223	6.08635e+06	3.79552e+06	4814188	3.59266e+06	5.48434e+06	6.30423e+06	3009001	3998830	4.19279e+06	0.394368	-1.34238	0.00177389
4-Ethyloctanoic acid	C10H20O2	11121203	10087879	8976714	11839756	8963184	10683619	14898223	6.08635e+06	3.79552e+06	4814188	3.59266e+06	5.48434e+06	6.30423e+06	3009001	3998830	4.19279e+06	0.394368	-1.34238	0.00177389
p-Menthane-3,8-diol	C10H20O2	11121203	10087879	8976714	11839756	8963184	10683619	14898223	6.08635e+06	3.79552e+06	4814188	3.59266e+06	5.48434e+06	6.30423e+06	3009001	3998830	4.19279e+06	0.394368	-1.34238	0.00177389
2-Methylpropyl hexanoate	C10H20O2	11121203	10087879	8976714	11839756	8963184	10683619	14898223	6.08635e+06	3.79552e+06	4814188	3.59266e+06	5.48434e+06	6.30423e+06	3009001	3998830	4.19279e+06	0.394368	-1.34238	0.00177389
7-Hydroxy-3,7-dimethyloctanal	C10H20O2	11121203	10087879	8976714	11839756	8963184	10683619	14898223	6.08635e+06	3.79552e+06	4814188	3.59266e+06	5.48434e+06	6.30423e+06	3009001	3998830	4.19279e+06	0.394368	-1.34238	0.00177389
2,6-Dimethyl-7-octene-2,6-diol	C10H20O2	11121203	10087879	8976714	11839756	8963184	10683619	14898223	6.08635e+06	3.79552e+06	4814188	3.59266e+06	5.48434e+06	6.30423e+06	3009001	3998830	4.19279e+06	0.394368	-1.34238	0.00177389
Methyl nonanoate	C10H20O2	11121203	10087879	8976714	11839756	8963184	10683619	14898223	6.08635e+06	3.79552e+06	4814188	3.59266e+06	5.48434e+06	6.30423e+06	3009001	3998830	4.19279e+06	0.394368	-1.34238	0.00177389
hexyl butyrate	C10H20O2	11121203	10087879	8976714	11839756	8963184	10683619	14898223	6.08635e+06	3.79552e+06	4814188	3.59266e+06	5.48434e+06	6.30423e+06	3009001	3998830	4.19279e+06	0.394368	-1.34238	0.00177389
Hexyl 2-methylpropanoate	C10H20O2	11121203	10087879	8976714	11839756	8963184	10683619	14898223	6.08635e+06	3.79552e+06	4814188	3.59266e+06	5.48434e+06	6.30423e+06	3009001	3998830	4.19279e+06	0.394368	-1.34238	0.00177389
(1S,3R,4R)-p-Menthane-1,3-diol	C10H20O2	11121203	10087879	8976714	11839756	8963184	10683619	14898223	6.08635e+06	3.79552e+06	4814188	3.59266e+06	5.48434e+06	6.30423e+06	3009001	3998830	4.19279e+06	0.394368	-1.34238	0.00177389
1beta,3beta,4alpha-p-menthane-3,8-diol	C10H20O2	11121203	10087879	8976714	11839756	8963184	10683619	14898223	6.08635e+06	3.79552e+06	4814188	3.59266e+06	5.48434e+06	6.30423e+06	3009001	3998830	4.19279e+06	0.394368	-1.34238	0.00177389
2-methyl nonaoic acid	C10H20O2	11121203	10087879	8976714	11839756	8963184	10683619	14898223	6.08635e+06	3.79552e+06	4814188	3.59266e+06	5.48434e+06	6.30423e+06	3009001	3998830	4.19279e+06	0.394368	-1.34238	0.00177389
2-Pentyl 3-methylbutanoate	C10H20O2	11121203	10087879	8976714	11839756	8963184	10683619	14898223	6.08635e+06	3.79552e+06	4814188	3.59266e+06	5.48434e+06	6.30423e+06	3009001	3998830	4.19279e+06	0.394368	-1.34238	0.00177389
formyl 4-methyl-octanoate	C10H20O2	11121203	10087879	8976714	11839756	8963184	10683619	14898223	6.08635e+06	3.79552e+06	4814188	3.59266e+06	5.48434e+06	6.30423e+06	3009001	3998830	4.19279e+06	0.394368	-1.34238	0.00177389
ethyl 4-methyl-heptanoate	C10H20O2	11121203	10087879	8976714	11839756	8963184	10683619	14898223	6.08635e+06	3.79552e+06	4814188	3.59266e+06	5.48434e+06	6.30423e+06	3009001	3998830	4.19279e+06	0.394368	-1.34238	0.00177389
1beta,3beta,4beta-p-menthane-3,8-diol	C10H20O2	11121203	10087879	8976714	11839756	8963184	10683619	14898223	6.08635e+06	3.79552e+06	4814188	3.59266e+06	5.48434e+06	6.30423e+06	3009001	3998830	4.19279e+06	0.394368	-1.34238	0.00177389
1beta,3alpha,4beta-p-menthane-3,8-diol	C10H20O2	11121203	10087879	8976714	11839756	8963184	10683619	14898223	6.08635e+06	3.79552e+06	4814188	3.59266e+06	5.48434e+06	6.30423e+06	3009001	3998830	4.19279e+06	0.394368	-1.34238	0.00177389
1alpha,3beta,4beta-p-menthane-3,8-diol	C10H20O2	11121203	10087879	8976714	11839756	8963184	10683619	14898223	6.08635e+06	3.79552e+06	4814188	3.59266e+06	5.48434e+06	6.30423e+06	3009001	3998830	4.19279e+06	0.394368	-1.34238	0.00177389
1beta,3alpha,4alpha-p-menthane-3,8-diol	C10H20O2	11121203	10087879	8976714	11839756	8963184	10683619	14898223	6.08635e+06	3.79552e+06	4814188	3.59266e+06	5.48434e+06	6.30423e+06	3009001	3998830	4.19279e+06	0.394368	-1.34238	0.00177389
1alpha,3alpha,4beta-p-menthane-3,8-diol	C10H20O2	11121203	10087879	8976714	11839756	8963184	10683619	14898223	6.08635e+06	3.79552e+06	4814188	3.59266e+06	5.48434e+06	6.30423e+06	3009001	3998830	4.19279e+06	0.394368	-1.34238	0.00177389
2-Hydroxydecan-3-one	C10H20O2	11121203	10087879	8976714	11839756	8963184	10683619	14898223	6.08635e+06	3.79552e+06	4814188	3.59266e+06	5.48434e+06	6.30423e+06	3009001	3998830	4.19279e+06	0.394368	-1.34238	0.00177389
3-Hydroxydecan-2-one	C10H20O2	11121203	10087879	8976714	11839756	8963184	10683619	14898223	6.08635e+06	3.79552e+06	4814188	3.59266e+06	5.48434e+06	6.30423e+06	3009001	3998830	4.19279e+06	0.394368	-1.34238	0.00177389
2S-Hydroxydecan-3-one	C10H20O2	11121203	10087879	8976714	11839756	8963184	10683619	14898223	6.08635e+06	3.79552e+06	4814188	3.59266e+06	5.48434e+06	6.30423e+06	3009001	3998830	4.19279e+06	0.394368	-1.34238	0.00177389
3-methyl-nonanoic acid	C10H20O2	11121203	10087879	8976714	11839756	8963184	10683619	14898223	6.08635e+06	3.79552e+06	4814188	3.59266e+06	5.48434e+06	6.30423e+06	3009001	3998830	4.19279e+06	0.394368	-1.34238	0.00177389
8-methyl-nonanoic acid	C10H20O2	11121203	10087879	8976714	11839756	8963184	10683619	14898223	6.08635e+06	3.79552e+06	4814188	3.59266e+06	5.48434e+06	6.30423e+06	3009001	3998830	4.19279e+06	0.394368	-1.34238	0.00177389
7-methyl-nonanoic acid	C10H20O2	11121203	10087879	8976714	11839756	8963184	10683619	14898223	6.08635e+06	3.79552e+06	4814188	3.59266e+06	5.48434e+06	6.30423e+06	3009001	3998830	4.19279e+06	0.394368	-1.34238	0.00177389
Cyclohexyl 3-methylbutanoate	C11H20O2	288594	268578	271059	298196	265667	311945	376786	205478	138894	79557.3	69502.4	59403.4	69310.7	57392.8	77989.3	73670.3	0.255824	-1.96678	2.78956e-05
Cyclohexyl pentanoate	C11H20O2	288594	268578	271059	298196	265667	311945	376786	205478	138894	79557.3	69502.4	59403.4	69310.7	57392.8	77989.3	73670.3	0.255824	-1.96678	2.78956e-05
5-Octenyl propanoate	C11H20O2	288594	268578	271059	298196	265667	311945	376786	205478	138894	79557.3	69502.4	59403.4	69310.7	57392.8	77989.3	73670.3	0.255824	-1.96678	2.78956e-05
cis-3-Hexenyl 2-methylbutanoate	C11H20O2	288594	268578	271059	298196	265667	311945	376786	205478	138894	79557.3	69502.4	59403.4	69310.7	57392.8	77989.3	73670.3	0.255824	-1.96678	2.78956e-05
(Z)-3-Hexenyl 3-methylbutanoate	C11H20O2	288594	268578	271059	298196	265667	311945	376786	205478	138894	79557.3	69502.4	59403.4	69310.7	57392.8	77989.3	73670.3	0.255824	-1.96678	2.78956e-05
2-Hexenyl valerate	C11H20O2	288594	268578	271059	298196	265667	311945	376786	205478	138894	79557.3	69502.4	59403.4	69310.7	57392.8	77989.3	73670.3	0.255824	-1.96678	2.78956e-05
2-Hexenyl isovalerate	C11H20O2	288594	268578	271059	298196	265667	311945	376786	205478	138894	79557.3	69502.4	59403.4	69310.7	57392.8	77989.3	73670.3	0.255824	-1.96678	2.78956e-05
gamma-undecalactone	C11H20O2	288594	268578	271059	298196	265667	311945	376786	205478	138894	79557.3	69502.4	59403.4	69310.7	57392.8	77989.3	73670.3	0.255824	-1.96678	2.78956e-05
trans-2-Hexyl-1-cyclopropaneacetic acid	C11H20O2	288594	268578	271059	298196	265667	311945	376786	205478	138894	79557.3	69502.4	59403.4	69310.7	57392.8	77989.3	73670.3	0.255824	-1.96678	2.78956e-05
(Z)-3-Methyl-4-decenoic acid	C11H20O2	288594	268578	271059	298196	265667	311945	376786	205478	138894	79557.3	69502.4	59403.4	69310.7	57392.8	77989.3	73670.3	0.255824	-1.96678	2.78956e-05
(Z)-3-Methyl-3-decenoic acid	C11H20O2	288594	268578	271059	298196	265667	311945	376786	205478	138894	79557.3	69502.4	59403.4	69310.7	57392.8	77989.3	73670.3	0.255824	-1.96678	2.78956e-05
2-Propenyl octanoate	C11H20O2	288594	268578	271059	298196	265667	311945	376786	205478	138894	79557.3	69502.4	59403.4	69310.7	57392.8	77989.3	73670.3	0.255824	-1.96678	2.78956e-05
3-Hexenyl 2-methylbutyrate	C11H20O2	288594	268578	271059	298196	265667	311945	376786	205478	138894	79557.3	69502.4	59403.4	69310.7	57392.8	77989.3	73670.3	0.255824	-1.96678	2.78956e-05
(E)-3-Heptenyl 2-methylpropanoate	C11H20O2	288594	268578	271059	298196	265667	311945	376786	205478	138894	79557.3	69502.4	59403.4	69310.7	57392.8	77989.3	73670.3	0.255824	-1.96678	2.78956e-05
Methyl 2-decenoate	C11H20O2	288594	268578	271059	298196	265667	311945	376786	205478	138894	79557.3	69502.4	59403.4	69310.7	57392.8	77989.3	73670.3	0.255824	-1.96678	2.78956e-05
6-Hexyltetrahydro-2H-pyran-2-one	C11H20O2	288594	268578	271059	298196	265667	311945	376786	205478	138894	79557.3	69502.4	59403.4	69310.7	57392.8	77989.3	73670.3	0.255824	-1.96678	2.78956e-05
5-Hexyldihydro-5-methyl-2(3H)-furanone	C11H20O2	288594	268578	271059	298196	265667	311945	376786	205478	138894	79557.3	69502.4	59403.4	69310.7	57392.8	77989.3	73670.3	0.255824	-1.96678	2.78956e-05
cis-3-Hexenyl pentanoate	C11H20O2	288594	268578	271059	298196	265667	311945	376786	205478	138894	79557.3	69502.4	59403.4	69310.7	57392.8	77989.3	73670.3	0.255824	-1.96678	2.78956e-05
2,3-Undecanedione	C11H20O2	288594	268578	271059	298196	265667	311945	376786	205478	138894	79557.3	69502.4	59403.4	69310.7	57392.8	77989.3	73670.3	0.255824	-1.96678	2.78956e-05
Ethyl (E)-2-nonenoate	C11H20O2	288594	268578	271059	298196	265667	311945	376786	205478	138894	79557.3	69502.4	59403.4	69310.7	57392.8	77989.3	73670.3	0.255824	-1.96678	2.78956e-05
Ethyl 3-cyclohexylpropionate	C11H20O2	288594	268578	271059	298196	265667	311945	376786	205478	138894	79557.3	69502.4	59403.4	69310.7	57392.8	77989.3	73670.3	0.255824	-1.96678	2.78956e-05
Citronellyl formate	C11H20O2	288594	268578	271059	298196	265667	311945	376786	205478	138894	79557.3	69502.4	59403.4	69310.7	57392.8	77989.3	73670.3	0.255824	-1.96678	2.78956e-05
10-hendecenoic acid	C11H20O2	288594	268578	271059	298196	265667	311945	376786	205478	138894	79557.3	69502.4	59403.4	69310.7	57392.8	77989.3	73670.3	0.255824	-1.96678	2.78956e-05
5-Hexyldihydro-4-methyl-2(3H)-furanone	C11H20O2	288594	268578	271059	298196	265667	311945	376786	205478	138894	79557.3	69502.4	59403.4	69310.7	57392.8	77989.3	73670.3	0.255824	-1.96678	2.78956e-05
(x)-1-Nonen-3-yl acetate	C11H20O2	288594	268578	271059	298196	265667	311945	376786	205478	138894	79557.3	69502.4	59403.4	69310.7	57392.8	77989.3	73670.3	0.255824	-1.96678	2.78956e-05
Rhodinyl formate	C11H20O2	288594	268578	271059	298196	265667	311945	376786	205478	138894	79557.3	69502.4	59403.4	69310.7	57392.8	77989.3	73670.3	0.255824	-1.96678	2.78956e-05
formyl 3,7-dimethyl-6E-octenoate	C11H20O2	288594	268578	271059	298196	265667	311945	376786	205478	138894	79557.3	69502.4	59403.4	69310.7	57392.8	77989.3	73670.3	0.255824	-1.96678	2.78956e-05
cis-3-Octenyl propionate	C11H20O2	288594	268578	271059	298196	265667	311945	376786	205478	138894	79557.3	69502.4	59403.4	69310.7	57392.8	77989.3	73670.3	0.255824	-1.96678	2.78956e-05
Pent-2-enyl hexanoate	C11H20O2	288594	268578	271059	298196	265667	311945	376786	205478	138894	79557.3	69502.4	59403.4	69310.7	57392.8	77989.3	73670.3	0.255824	-1.96678	2.78956e-05
6-Methyl-5-hepten-2-one propyleneglycol acetal	C11H20O2	288594	268578	271059	298196	265667	311945	376786	205478	138894	79557.3	69502.4	59403.4	69310.7	57392.8	77989.3	73670.3	0.255824	-1.96678	2.78956e-05
Prenyl caproate	C11H20O2	288594	268578	271059	298196	265667	311945	376786	205478	138894	79557.3	69502.4	59403.4	69310.7	57392.8	77989.3	73670.3	0.255824	-1.96678	2.78956e-05
trans-2-Hexenyl 2-methylbutyrate	C11H20O2	288594	268578	271059	298196	265667	311945	376786	205478	138894	79557.3	69502.4	59403.4	69310.7	57392.8	77989.3	73670.3	0.255824	-1.96678	2.78956e-05
2-Ethylhexyl acrylate	C11H20O2	288594	268578	271059	298196	265667	311945	376786	205478	138894	79557.3	69502.4	59403.4	69310.7	57392.8	77989.3	73670.3	0.255824	-1.96678	2.78956e-05
gamma-Undecalactone	C11H20O2	288594	268578	271059	298196	265667	311945	376786	205478	138894	79557.3	69502.4	59403.4	69310.7	57392.8	77989.3	73670.3	0.255824	-1.96678	2.78956e-05
11-undecanolactone	C11H20O2	288594	268578	271059	298196	265667	311945	376786	205478	138894	79557.3	69502.4	59403.4	69310.7	57392.8	77989.3	73670.3	0.255824	-1.96678	2.78956e-05
6E-Nonenyl acetate	C11H20O2	288594	268578	271059	298196	265667	311945	376786	205478	138894	79557.3	69502.4	59403.4	69310.7	57392.8	77989.3	73670.3	0.255824	-1.96678	2.78956e-05
2-Nonenyl acetate	C11H20O2	288594	268578	271059	298196	265667	311945	376786	205478	138894	79557.3	69502.4	59403.4	69310.7	57392.8	77989.3	73670.3	0.255824	-1.96678	2.78956e-05
formyl 4Z-decenoate	C11H20O2	288594	268578	271059	298196	265667	311945	376786	205478	138894	79557.3	69502.4	59403.4	69310.7	57392.8	77989.3	73670.3	0.255824	-1.96678	2.78956e-05
(2S,6R,8S)-2,8-Dimethyl-1,7-dioxaspiro[5.5]undecane	C11H20O2	288594	268578	271059	298196	265667	311945	376786	205478	138894	79557.3	69502.4	59403.4	69310.7	57392.8	77989.3	73670.3	0.255824	-1.96678	2.78956e-05
2-Ethyl-7-methyl-1,6-dioxaspiro[4.5]decane	C11H20O2	288594	268578	271059	298196	265667	311945	376786	205478	138894	79557.3	69502.4	59403.4	69310.7	57392.8	77989.3	73670.3	0.255824	-1.96678	2.78956e-05
2-Methyl-1,7-dioxaspiro[5.6]dodecane	C11H20O2	288594	268578	271059	298196	265667	311945	376786	205478	138894	79557.3	69502.4	59403.4	69310.7	57392.8	77989.3	73670.3	0.255824	-1.96678	2.78956e-05
2,7-Diethyl-1,6-dioxaspiro[4.4]nonane	C11H20O2	288594	268578	271059	298196	265667	311945	376786	205478	138894	79557.3	69502.4	59403.4	69310.7	57392.8	77989.3	73670.3	0.255824	-1.96678	2.78956e-05
7-Ethyl-2R-methyl-1,6-dioxaspiro[4.5]decane	C11H20O2	288594	268578	271059	298196	265667	311945	376786	205478	138894	79557.3	69502.4	59403.4	69310.7	57392.8	77989.3	73670.3	0.255824	-1.96678	2.78956e-05
2-Ethyl-1,7-dioxaspiro[5.5]undecane	C11H20O2	288594	268578	271059	298196	265667	311945	376786	205478	138894	79557.3	69502.4	59403.4	69310.7	57392.8	77989.3	73670.3	0.255824	-1.96678	2.78956e-05
2S-Ethyl-7-methyl-1,6-dioxaspiro[4.5]decane	C11H20O2	288594	268578	271059	298196	265667	311945	376786	205478	138894	79557.3	69502.4	59403.4	69310.7	57392.8	77989.3	73670.3	0.255824	-1.96678	2.78956e-05
(2S,6S,8S)-2,8-Dimethyl-1,7-dioxaspiro[5.5]undecane	C11H20O2	288594	268578	271059	298196	265667	311945	376786	205478	138894	79557.3	69502.4	59403.4	69310.7	57392.8	77989.3	73670.3	0.255824	-1.96678	2.78956e-05
2-Methyl-7-propyl-1,6-dioxaspiro[4.4]nonane	C11H20O2	288594	268578	271059	298196	265667	311945	376786	205478	138894	79557.3	69502.4	59403.4	69310.7	57392.8	77989.3	73670.3	0.255824	-1.96678	2.78956e-05
2,7-Dimethyl-1,6-dioxaspiro[4.6]undecane	C11H20O2	288594	268578	271059	298196	265667	311945	376786	205478	138894	79557.3	69502.4	59403.4	69310.7	57392.8	77989.3	73670.3	0.255824	-1.96678	2.78956e-05
7-undecenoic acid	C11H20O2	288594	268578	271059	298196	265667	311945	376786	205478	138894	79557.3	69502.4	59403.4	69310.7	57392.8	77989.3	73670.3	0.255824	-1.96678	2.78956e-05
6-undecenoic acid	C11H20O2	288594	268578	271059	298196	265667	311945	376786	205478	138894	79557.3	69502.4	59403.4	69310.7	57392.8	77989.3	73670.3	0.255824	-1.96678	2.78956e-05
4-undecenoic acid	C11H20O2	288594	268578	271059	298196	265667	311945	376786	205478	138894	79557.3	69502.4	59403.4	69310.7	57392.8	77989.3	73670.3	0.255824	-1.96678	2.78956e-05
5Z-undecenoic acid	C11H20O2	288594	268578	271059	298196	265667	311945	376786	205478	138894	79557.3	69502.4	59403.4	69310.7	57392.8	77989.3	73670.3	0.255824	-1.96678	2.78956e-05
5E-undecenoic acid	C11H20O2	288594	268578	271059	298196	265667	311945	376786	205478	138894	79557.3	69502.4	59403.4	69310.7	57392.8	77989.3	73670.3	0.255824	-1.96678	2.78956e-05
9-hendecenoic acid	C11H20O2	288594	268578	271059	298196	265667	311945	376786	205478	138894	79557.3	69502.4	59403.4	69310.7	57392.8	77989.3	73670.3	0.255824	-1.96678	2.78956e-05
2-hendecenoic acid	C11H20O2	288594	268578	271059	298196	265667	311945	376786	205478	138894	79557.3	69502.4	59403.4	69310.7	57392.8	77989.3	73670.3	0.255824	-1.96678	2.78956e-05
6Z-undecenoic acid	C11H20O2	288594	268578	271059	298196	265667	311945	376786	205478	138894	79557.3	69502.4	59403.4	69310.7	57392.8	77989.3	73670.3	0.255824	-1.96678	2.78956e-05
3E-undecenoic acid	C11H20O2	288594	268578	271059	298196	265667	311945	376786	205478	138894	79557.3	69502.4	59403.4	69310.7	57392.8	77989.3	73670.3	0.255824	-1.96678	2.78956e-05
2Z-undecenoic acid	C11H20O2	288594	268578	271059	298196	265667	311945	376786	205478	138894	79557.3	69502.4	59403.4	69310.7	57392.8	77989.3	73670.3	0.255824	-1.96678	2.78956e-05
9Z-undecenoic acid	C11H20O2	288594	268578	271059	298196	265667	311945	376786	205478	138894	79557.3	69502.4	59403.4	69310.7	57392.8	77989.3	73670.3	0.255824	-1.96678	2.78956e-05
8Z-undecenoic acid	C11H20O2	288594	268578	271059	298196	265667	311945	376786	205478	138894	79557.3	69502.4	59403.4	69310.7	57392.8	77989.3	73670.3	0.255824	-1.96678	2.78956e-05
2,7-dimethyl-6-nonenoic acid	C11H20O2	288594	268578	271059	298196	265667	311945	376786	205478	138894	79557.3	69502.4	59403.4	69310.7	57392.8	77989.3	73670.3	0.255824	-1.96678	2.78956e-05
4-ethyl-2-methyl-2-octenoic acid	C11H20O2	288594	268578	271059	298196	265667	311945	376786	205478	138894	79557.3	69502.4	59403.4	69310.7	57392.8	77989.3	73670.3	0.255824	-1.96678	2.78956e-05
Undecylic acid	C11H22O2	1.92771e+06	1.75543e+06	1.51771e+06	1.82407e+06	1.44055e+06	1.84583e+06	2.4127e+06	1.11724e+06	395764	515219	399649	605233	634459	299146	377582	443190	0.235463	-2.08643	0.000487558
Heptyl butyrate	C11H22O2	1.92771e+06	1.75543e+06	1.51771e+06	1.82407e+06	1.44055e+06	1.84583e+06	2.4127e+06	1.11724e+06	395764	515219	399649	605233	634459	299146	377582	443190	0.235463	-2.08643	0.000487558
9-methyl-decanoic acid	C11H22O2	1.92771e+06	1.75543e+06	1.51771e+06	1.82407e+06	1.44055e+06	1.84583e+06	2.4127e+06	1.11724e+06	395764	515219	399649	605233	634459	299146	377582	443190	0.235463	-2.08643	0.000487558
Isobutyl enanthate	C11H22O2	1.92771e+06	1.75543e+06	1.51771e+06	1.82407e+06	1.44055e+06	1.84583e+06	2.4127e+06	1.11724e+06	395764	515219	399649	605233	634459	299146	377582	443190	0.235463	-2.08643	0.000487558
Octyl propanoate	C11H22O2	1.92771e+06	1.75543e+06	1.51771e+06	1.82407e+06	1.44055e+06	1.84583e+06	2.4127e+06	1.11724e+06	395764	515219	399649	605233	634459	299146	377582	443190	0.235463	-2.08643	0.000487558
7,7-Diethoxy-3-heptene	C11H22O2	1.92771e+06	1.75543e+06	1.51771e+06	1.82407e+06	1.44055e+06	1.84583e+06	2.4127e+06	1.11724e+06	395764	515219	399649	605233	634459	299146	377582	443190	0.235463	-2.08643	0.000487558
8-methyl-decanoic acid	C11H22O2	1.92771e+06	1.75543e+06	1.51771e+06	1.82407e+06	1.44055e+06	1.84583e+06	2.4127e+06	1.11724e+06	395764	515219	399649	605233	634459	299146	377582	443190	0.235463	-2.08643	0.000487558
formyl decanoate	C11H22O2	1.92771e+06	1.75543e+06	1.51771e+06	1.82407e+06	1.44055e+06	1.84583e+06	2.4127e+06	1.11724e+06	395764	515219	399649	605233	634459	299146	377582	443190	0.235463	-2.08643	0.000487558
2-Methylbutyl hexanoate	C11H22O2	1.92771e+06	1.75543e+06	1.51771e+06	1.82407e+06	1.44055e+06	1.84583e+06	2.4127e+06	1.11724e+06	395764	515219	399649	605233	634459	299146	377582	443190	0.235463	-2.08643	0.000487558
Propyl octanoate	C11H22O2	1.92771e+06	1.75543e+06	1.51771e+06	1.82407e+06	1.44055e+06	1.84583e+06	2.4127e+06	1.11724e+06	395764	515219	399649	605233	634459	299146	377582	443190	0.235463	-2.08643	0.000487558
Hexyl 2-methylbutanoate	C11H22O2	1.92771e+06	1.75543e+06	1.51771e+06	1.82407e+06	1.44055e+06	1.84583e+06	2.4127e+06	1.11724e+06	395764	515219	399649	605233	634459	299146	377582	443190	0.235463	-2.08643	0.000487558
Ethyl nonanoate	C11H22O2	1.92771e+06	1.75543e+06	1.51771e+06	1.82407e+06	1.44055e+06	1.84583e+06	2.4127e+06	1.11724e+06	395764	515219	399649	605233	634459	299146	377582	443190	0.235463	-2.08643	0.000487558
Heptyl 2-methylpropanoate	C11H22O2	1.92771e+06	1.75543e+06	1.51771e+06	1.82407e+06	1.44055e+06	1.84583e+06	2.4127e+06	1.11724e+06	395764	515219	399649	605233	634459	299146	377582	443190	0.235463	-2.08643	0.000487558
Nonyl acetate	C11H22O2	1.92771e+06	1.75543e+06	1.51771e+06	1.82407e+06	1.44055e+06	1.84583e+06	2.4127e+06	1.11724e+06	395764	515219	399649	605233	634459	299146	377582	443190	0.235463	-2.08643	0.000487558
Hexyl 3-methylbutanoate	C11H22O2	1.92771e+06	1.75543e+06	1.51771e+06	1.82407e+06	1.44055e+06	1.84583e+06	2.4127e+06	1.11724e+06	395764	515219	399649	605233	634459	299146	377582	443190	0.235463	-2.08643	0.000487558
2-Hexyl-4,5-dimethyl-1,3-dioxolane	C11H22O2	1.92771e+06	1.75543e+06	1.51771e+06	1.82407e+06	1.44055e+06	1.84583e+06	2.4127e+06	1.11724e+06	395764	515219	399649	605233	634459	299146	377582	443190	0.235463	-2.08643	0.000487558
6,6-Dimethoxy-2,5,5-trimethyl-2-hexene	C11H22O2	1.92771e+06	1.75543e+06	1.51771e+06	1.82407e+06	1.44055e+06	1.84583e+06	2.4127e+06	1.11724e+06	395764	515219	399649	605233	634459	299146	377582	443190	0.235463	-2.08643	0.000487558
valeryl hexanoate	C11H22O2	1.92771e+06	1.75543e+06	1.51771e+06	1.82407e+06	1.44055e+06	1.84583e+06	2.4127e+06	1.11724e+06	395764	515219	399649	605233	634459	299146	377582	443190	0.235463	-2.08643	0.000487558
4,8-dimethyl-nonanoic acid	C11H22O2	1.92771e+06	1.75543e+06	1.51771e+06	1.82407e+06	1.44055e+06	1.84583e+06	2.4127e+06	1.11724e+06	395764	515219	399649	605233	634459	299146	377582	443190	0.235463	-2.08643	0.000487558
Butyl heptanoate	C11H22O2	1.92771e+06	1.75543e+06	1.51771e+06	1.82407e+06	1.44055e+06	1.84583e+06	2.4127e+06	1.11724e+06	395764	515219	399649	605233	634459	299146	377582	443190	0.235463	-2.08643	0.000487558
3-Methylbutyl hexanoate	C11H22O2	1.92771e+06	1.75543e+06	1.51771e+06	1.82407e+06	1.44055e+06	1.84583e+06	2.4127e+06	1.11724e+06	395764	515219	399649	605233	634459	299146	377582	443190	0.235463	-2.08643	0.000487558
Octanal propyleneglycol acetal	C11H22O2	1.92771e+06	1.75543e+06	1.51771e+06	1.82407e+06	1.44055e+06	1.84583e+06	2.4127e+06	1.11724e+06	395764	515219	399649	605233	634459	299146	377582	443190	0.235463	-2.08643	0.000487558
2-methyl-decanoic acid	C11H22O2	1.92771e+06	1.75543e+06	1.51771e+06	1.82407e+06	1.44055e+06	1.84583e+06	2.4127e+06	1.11724e+06	395764	515219	399649	605233	634459	299146	377582	443190	0.235463	-2.08643	0.000487558
4-Methyloctyl acetate	C11H22O2	1.92771e+06	1.75543e+06	1.51771e+06	1.82407e+06	1.44055e+06	1.84583e+06	2.4127e+06	1.11724e+06	395764	515219	399649	605233	634459	299146	377582	443190	0.235463	-2.08643	0.000487558
Isopropyl octanoate	C11H22O2	1.92771e+06	1.75543e+06	1.51771e+06	1.82407e+06	1.44055e+06	1.84583e+06	2.4127e+06	1.11724e+06	395764	515219	399649	605233	634459	299146	377582	443190	0.235463	-2.08643	0.000487558
3,7-Dimethyl-6-octenyl formate	C11H22O2	1.92771e+06	1.75543e+06	1.51771e+06	1.82407e+06	1.44055e+06	1.84583e+06	2.4127e+06	1.11724e+06	395764	515219	399649	605233	634459	299146	377582	443190	0.235463	-2.08643	0.000487558
Methyl 3,7-dimethyl-6-octenoate	C11H22O2	1.92771e+06	1.75543e+06	1.51771e+06	1.82407e+06	1.44055e+06	1.84583e+06	2.4127e+06	1.11724e+06	395764	515219	399649	605233	634459	299146	377582	443190	0.235463	-2.08643	0.000487558
ethyl 4-methyl-octanoate	C11H22O2	1.92771e+06	1.75543e+06	1.51771e+06	1.82407e+06	1.44055e+06	1.84583e+06	2.4127e+06	1.11724e+06	395764	515219	399649	605233	634459	299146	377582	443190	0.235463	-2.08643	0.000487558
decyl formate	C11H22O2	1.92771e+06	1.75543e+06	1.51771e+06	1.82407e+06	1.44055e+06	1.84583e+06	2.4127e+06	1.11724e+06	395764	515219	399649	605233	634459	299146	377582	443190	0.235463	-2.08643	0.000487558
2-Hydroxyundecan-6-one	C11H22O2	1.92771e+06	1.75543e+06	1.51771e+06	1.82407e+06	1.44055e+06	1.84583e+06	2.4127e+06	1.11724e+06	395764	515219	399649	605233	634459	299146	377582	443190	0.235463	-2.08643	0.000487558
3,3-dimethyl-nonanoic acid	C11H22O2	1.92771e+06	1.75543e+06	1.51771e+06	1.82407e+06	1.44055e+06	1.84583e+06	2.4127e+06	1.11724e+06	395764	515219	399649	605233	634459	299146	377582	443190	0.235463	-2.08643	0.000487558
6-methyl-decanoic acid	C11H22O2	1.92771e+06	1.75543e+06	1.51771e+06	1.82407e+06	1.44055e+06	1.84583e+06	2.4127e+06	1.11724e+06	395764	515219	399649	605233	634459	299146	377582	443190	0.235463	-2.08643	0.000487558
5-methyl-decanoic acid	C11H22O2	1.92771e+06	1.75543e+06	1.51771e+06	1.82407e+06	1.44055e+06	1.84583e+06	2.4127e+06	1.11724e+06	395764	515219	399649	605233	634459	299146	377582	443190	0.235463	-2.08643	0.000487558
7-methyl-decanoic acid	C11H22O2	1.92771e+06	1.75543e+06	1.51771e+06	1.82407e+06	1.44055e+06	1.84583e+06	2.4127e+06	1.11724e+06	395764	515219	399649	605233	634459	299146	377582	443190	0.235463	-2.08643	0.000487558
4-methyl-decanoic acid	C11H22O2	1.92771e+06	1.75543e+06	1.51771e+06	1.82407e+06	1.44055e+06	1.84583e+06	2.4127e+06	1.11724e+06	395764	515219	399649	605233	634459	299146	377582	443190	0.235463	-2.08643	0.000487558
3-methyl-decanoic acid	C11H22O2	1.92771e+06	1.75543e+06	1.51771e+06	1.82407e+06	1.44055e+06	1.84583e+06	2.4127e+06	1.11724e+06	395764	515219	399649	605233	634459	299146	377582	443190	0.235463	-2.08643	0.000487558
5R-methyl-decanoic acid	C11H22O2	1.92771e+06	1.75543e+06	1.51771e+06	1.82407e+06	1.44055e+06	1.84583e+06	2.4127e+06	1.11724e+06	395764	515219	399649	605233	634459	299146	377582	443190	0.235463	-2.08643	0.000487558
9:0(8Me,8Me)	C11H22O2	1.92771e+06	1.75543e+06	1.51771e+06	1.82407e+06	1.44055e+06	1.84583e+06	2.4127e+06	1.11724e+06	395764	515219	399649	605233	634459	299146	377582	443190	0.235463	-2.08643	0.000487558
6-Pentyl-1,4-dioxan-2-one	C9H16O3	1.34083e+06	1088378	1344857	1.07417e+06	975406	1193672	1.47277e+06	915421	545263	401831	661026	358165	457649	484513	523679	680422	0.441792	-1.17856	0.000181367
5-Pentyl-1,4-dioxan-2-one	C9H16O3	1.34083e+06	1088378	1344857	1.07417e+06	975406	1193672	1.47277e+06	915421	545263	401831	661026	358165	457649	484513	523679	680422	0.441792	-1.17856	0.000181367
4-hydroperoxynonenal	C9H16O3	1.34083e+06	1088378	1344857	1.07417e+06	975406	1193672	1.47277e+06	915421	545263	401831	661026	358165	457649	484513	523679	680422	0.441792	-1.17856	0.000181367
Butyl 3-hydroxy-2-methylidenebutanoate	C9H16O3	1.34083e+06	1088378	1344857	1.07417e+06	975406	1193672	1.47277e+06	915421	545263	401831	661026	358165	457649	484513	523679	680422	0.441792	-1.17856	0.000181367
2-Methylpropyl 3-hydroxy-2-methylidenebutanoate	C9H16O3	1.34083e+06	1088378	1344857	1.07417e+06	975406	1193672	1.47277e+06	915421	545263	401831	661026	358165	457649	484513	523679	680422	0.441792	-1.17856	0.000181367
Butyl levulinate	C9H16O3	1.34083e+06	1088378	1344857	1.07417e+06	975406	1193672	1.47277e+06	915421	545263	401831	661026	358165	457649	484513	523679	680422	0.441792	-1.17856	0.000181367
Tetrahydrofurfuryl butyrate	C9H16O3	1.34083e+06	1088378	1344857	1.07417e+06	975406	1193672	1.47277e+06	915421	545263	401831	661026	358165	457649	484513	523679	680422	0.441792	-1.17856	0.000181367
cis-3-Hexenyl lactate	C9H16O3	1.34083e+06	1088378	1344857	1.07417e+06	975406	1193672	1.47277e+06	915421	545263	401831	661026	358165	457649	484513	523679	680422	0.441792	-1.17856	0.000181367
3-Methylbutyl 3-oxobutanoate	C9H16O3	1.34083e+06	1088378	1344857	1.07417e+06	975406	1193672	1.47277e+06	915421	545263	401831	661026	358165	457649	484513	523679	680422	0.441792	-1.17856	0.000181367
9-oxo-nonanoic acid	C9H16O3	1.34083e+06	1088378	1344857	1.07417e+06	975406	1193672	1.47277e+06	915421	545263	401831	661026	358165	457649	484513	523679	680422	0.441792	-1.17856	0.000181367
(4S,6S)-4-Hydroxy-1,7-dioxaspiro[5.5]undecane	C9H16O3	1.34083e+06	1088378	1344857	1.07417e+06	975406	1193672	1.47277e+06	915421	545263	401831	661026	358165	457649	484513	523679	680422	0.441792	-1.17856	0.000181367
(4R,6S)-4-Hydroxy-1,7-dioxaspiro[5.5]undecane	C9H16O3	1.34083e+06	1088378	1344857	1.07417e+06	975406	1193672	1.47277e+06	915421	545263	401831	661026	358165	457649	484513	523679	680422	0.441792	-1.17856	0.000181367
(3S,6S)-3-Hydroxy-1,7-dioxaspiro[5.5]undecane	C9H16O3	1.34083e+06	1088378	1344857	1.07417e+06	975406	1193672	1.47277e+06	915421	545263	401831	661026	358165	457649	484513	523679	680422	0.441792	-1.17856	0.000181367
(3R,6S)-3-Hydroxy-1,7-dioxaspiro[5.5]undecane	C9H16O3	1.34083e+06	1088378	1344857	1.07417e+06	975406	1193672	1.47277e+06	915421	545263	401831	661026	358165	457649	484513	523679	680422	0.441792	-1.17856	0.000181367
4-n-valeryl butyric acid	C9H16O3	1.34083e+06	1088378	1344857	1.07417e+06	975406	1193672	1.47277e+06	915421	545263	401831	661026	358165	457649	484513	523679	680422	0.441792	-1.17856	0.000181367
3-caproyl propionic acid	C9H16O3	1.34083e+06	1088378	1344857	1.07417e+06	975406	1193672	1.47277e+06	915421	545263	401831	661026	358165	457649	484513	523679	680422	0.441792	-1.17856	0.000181367
6-propionyl n-caproic acid	C9H16O3	1.34083e+06	1088378	1344857	1.07417e+06	975406	1193672	1.47277e+06	915421	545263	401831	661026	358165	457649	484513	523679	680422	0.441792	-1.17856	0.000181367
n-butyrl n-valeric acid	C9H16O3	1.34083e+06	1088378	1344857	1.07417e+06	975406	1193672	1.47277e+06	915421	545263	401831	661026	358165	457649	484513	523679	680422	0.441792	-1.17856	0.000181367
n-heptanoyl acetic acid	C9H16O3	1.34083e+06	1088378	1344857	1.07417e+06	975406	1193672	1.47277e+06	915421	545263	401831	661026	358165	457649	484513	523679	680422	0.441792	-1.17856	0.000181367
8-oxo-nonanoic acid	C9H16O3	1.34083e+06	1088378	1344857	1.07417e+06	975406	1193672	1.47277e+06	915421	545263	401831	661026	358165	457649	484513	523679	680422	0.441792	-1.17856	0.000181367
7-methyl-4-oxo-octanoic acid	C9H16O3	1.34083e+06	1088378	1344857	1.07417e+06	975406	1193672	1.47277e+06	915421	545263	401831	661026	358165	457649	484513	523679	680422	0.441792	-1.17856	0.000181367
3-oxo-nonanoic acid	C9H16O3	1.34083e+06	1088378	1344857	1.07417e+06	975406	1193672	1.47277e+06	915421	545263	401831	661026	358165	457649	484513	523679	680422	0.441792	-1.17856	0.000181367
7-methyl-6-oxo-octanoic acid	C9H16O3	1.34083e+06	1088378	1344857	1.07417e+06	975406	1193672	1.47277e+06	915421	545263	401831	661026	358165	457649	484513	523679	680422	0.441792	-1.17856	0.000181367
7-methyl-3-oxooctanoic acid	C9H16O3	1.34083e+06	1088378	1344857	1.07417e+06	975406	1193672	1.47277e+06	915421	545263	401831	661026	358165	457649	484513	523679	680422	0.441792	-1.17856	0.000181367
9-hydroxy-5Z-nonenoic acid	C9H16O3	1.34083e+06	1088378	1344857	1.07417e+06	975406	1193672	1.47277e+06	915421	545263	401831	661026	358165	457649	484513	523679	680422	0.441792	-1.17856	0.000181367
Polypropylene glycol (m w 1,200-3,000)	C6H14O3	818971	703309	703852	667333	534933	842655	863610	615974	167189	140347	287230	206984	234254	181737	279036	292988	0.313566	-1.67316	3.11763e-05
1,2,6-Hexanetriol	C6H14O3	818971	703309	703852	667333	534933	842655	863610	615974	167189	140347	287230	206984	234254	181737	279036	292988	0.313566	-1.67316	3.11763e-05
3-(2-Hydroxy-4-methylphenyl)-2-butanone	C11H14O2	293083	246385	265792	243101	191318	275322	389194	171621	72236.2	89143.8	76298.9	106640	149144	41864.3	150569	141195	0.382258	-1.38738	0.00177389
2-Phenylethyl propanoate	C11H14O2	293083	246385	265792	243101	191318	275322	389194	171621	72236.2	89143.8	76298.9	106640	149144	41864.3	150569	141195	0.382258	-1.38738	0.00177389
2-Methylpropyl benzoate	C11H14O2	293083	246385	265792	243101	191318	275322	389194	171621	72236.2	89143.8	76298.9	106640	149144	41864.3	150569	141195	0.382258	-1.38738	0.00177389
2-Ethoxy-5-(1-propenyl)phenol	C11H14O2	293083	246385	265792	243101	191318	275322	389194	171621	72236.2	89143.8	76298.9	106640	149144	41864.3	150569	141195	0.382258	-1.38738	0.00177389
Osmorhizole	C11H14O2	293083	246385	265792	243101	191318	275322	389194	171621	72236.2	89143.8	76298.9	106640	149144	41864.3	150569	141195	0.382258	-1.38738	0.00177389
1-Phenylethyl propanoate	C11H14O2	293083	246385	265792	243101	191318	275322	389194	171621	72236.2	89143.8	76298.9	106640	149144	41864.3	150569	141195	0.382258	-1.38738	0.00177389
Ethyl 3-phenylpropanoate	C11H14O2	293083	246385	265792	243101	191318	275322	389194	171621	72236.2	89143.8	76298.9	106640	149144	41864.3	150569	141195	0.382258	-1.38738	0.00177389
Propyl phenylacetate	C11H14O2	293083	246385	265792	243101	191318	275322	389194	171621	72236.2	89143.8	76298.9	106640	149144	41864.3	150569	141195	0.382258	-1.38738	0.00177389
Isopropyl phenylacetate	C11H14O2	293083	246385	265792	243101	191318	275322	389194	171621	72236.2	89143.8	76298.9	106640	149144	41864.3	150569	141195	0.382258	-1.38738	0.00177389
alpha,alpha-Dimethylphenethyl formate	C11H14O2	293083	246385	265792	243101	191318	275322	389194	171621	72236.2	89143.8	76298.9	106640	149144	41864.3	150569	141195	0.382258	-1.38738	0.00177389
Methyl 4-phenylbutanoate	C11H14O2	293083	246385	265792	243101	191318	275322	389194	171621	72236.2	89143.8	76298.9	106640	149144	41864.3	150569	141195	0.382258	-1.38738	0.00177389
Methylisoeugenol	C11H14O2	293083	246385	265792	243101	191318	275322	389194	171621	72236.2	89143.8	76298.9	106640	149144	41864.3	150569	141195	0.382258	-1.38738	0.00177389
5-Phenylvaleric acid	C11H14O2	293083	246385	265792	243101	191318	275322	389194	171621	72236.2	89143.8	76298.9	106640	149144	41864.3	150569	141195	0.382258	-1.38738	0.00177389
Methyleugenol	C11H14O2	293083	246385	265792	243101	191318	275322	389194	171621	72236.2	89143.8	76298.9	106640	149144	41864.3	150569	141195	0.382258	-1.38738	0.00177389
Phenylmethyl 2-methylpropanoate	C11H14O2	293083	246385	265792	243101	191318	275322	389194	171621	72236.2	89143.8	76298.9	106640	149144	41864.3	150569	141195	0.382258	-1.38738	0.00177389
3-Phenylpropyl acetate	C11H14O2	293083	246385	265792	243101	191318	275322	389194	171621	72236.2	89143.8	76298.9	106640	149144	41864.3	150569	141195	0.382258	-1.38738	0.00177389
Phenylmethyl butanoate	C11H14O2	293083	246385	265792	243101	191318	275322	389194	171621	72236.2	89143.8	76298.9	106640	149144	41864.3	150569	141195	0.382258	-1.38738	0.00177389
4-(4-Methoxyphenyl)-2-butanone	C11H14O2	293083	246385	265792	243101	191318	275322	389194	171621	72236.2	89143.8	76298.9	106640	149144	41864.3	150569	141195	0.382258	-1.38738	0.00177389
p-Tolyl isobutyrate	C11H14O2	293083	246385	265792	243101	191318	275322	389194	171621	72236.2	89143.8	76298.9	106640	149144	41864.3	150569	141195	0.382258	-1.38738	0.00177389
2-Methylphenyl 2-methylpropanoate	C11H14O2	293083	246385	265792	243101	191318	275322	389194	171621	72236.2	89143.8	76298.9	106640	149144	41864.3	150569	141195	0.382258	-1.38738	0.00177389
Methylisoeugenol	C11H14O2	293083	246385	265792	243101	191318	275322	389194	171621	72236.2	89143.8	76298.9	106640	149144	41864.3	150569	141195	0.382258	-1.38738	0.00177389
4-t-Butylbenzoic acid	C11H14O2	293083	246385	265792	243101	191318	275322	389194	171621	72236.2	89143.8	76298.9	106640	149144	41864.3	150569	141195	0.382258	-1.38738	0.00177389
1,1-Dimethylethyl benzoate	C11H14O2	293083	246385	265792	243101	191318	275322	389194	171621	72236.2	89143.8	76298.9	106640	149144	41864.3	150569	141195	0.382258	-1.38738	0.00177389
3,5-Dimethoxyallylbenzene	C11H14O2	293083	246385	265792	243101	191318	275322	389194	171621	72236.2	89143.8	76298.9	106640	149144	41864.3	150569	141195	0.382258	-1.38738	0.00177389
1-Phenylpropyl acetate	C11H14O2	293083	246385	265792	243101	191318	275322	389194	171621	72236.2	89143.8	76298.9	106640	149144	41864.3	150569	141195	0.382258	-1.38738	0.00177389
2-Phenylpropyl acetate	C11H14O2	293083	246385	265792	243101	191318	275322	389194	171621	72236.2	89143.8	76298.9	106640	149144	41864.3	150569	141195	0.382258	-1.38738	0.00177389
Epoxyanethole	C10H12O2	366724	307306	281947	314430	291533	318799	391287	246331	64605.6	159978	94811.4	64758.7	92237.6	92393.3	81695.2	41987.2	0.279754	-1.83777	7.48916e-06
Thymoquinone	C10H12O2	366724	307306	281947	314430	291533	318799	391287	246331	64605.6	159978	94811.4	64758.7	92237.6	92393.3	81695.2	41987.2	0.279754	-1.83777	7.48916e-06
3-Phenylpropyl formate	C10H12O2	366724	307306	281947	314430	291533	318799	391287	246331	64605.6	159978	94811.4	64758.7	92237.6	92393.3	81695.2	41987.2	0.279754	-1.83777	7.48916e-06
Benzenebutanoic acid	C10H12O2	366724	307306	281947	314430	291533	318799	391287	246331	64605.6	159978	94811.4	64758.7	92237.6	92393.3	81695.2	41987.2	0.279754	-1.83777	7.48916e-06
2-Phenylbutyric acid	C10H12O2	366724	307306	281947	314430	291533	318799	391287	246331	64605.6	159978	94811.4	64758.7	92237.6	92393.3	81695.2	41987.2	0.279754	-1.83777	7.48916e-06
Egomaketone	C10H12O2	366724	307306	281947	314430	291533	318799	391287	246331	64605.6	159978	94811.4	64758.7	92237.6	92393.3	81695.2	41987.2	0.279754	-1.83777	7.48916e-06
Phenethyl acetate	C10H12O2	366724	307306	281947	314430	291533	318799	391287	246331	64605.6	159978	94811.4	64758.7	92237.6	92393.3	81695.2	41987.2	0.279754	-1.83777	7.48916e-06
4-Isopropylbenzoic acid	C10H12O2	366724	307306	281947	314430	291533	318799	391287	246331	64605.6	159978	94811.4	64758.7	92237.6	92393.3	81695.2	41987.2	0.279754	-1.83777	7.48916e-06
beta-Thujaplicin	C10H12O2	366724	307306	281947	314430	291533	318799	391287	246331	64605.6	159978	94811.4	64758.7	92237.6	92393.3	81695.2	41987.2	0.279754	-1.83777	7.48916e-06
3-Phenylbutyric acid	C10H12O2	366724	307306	281947	314430	291533	318799	391287	246331	64605.6	159978	94811.4	64758.7	92237.6	92393.3	81695.2	41987.2	0.279754	-1.83777	7.48916e-06
Lepalone	C10H12O2	366724	307306	281947	314430	291533	318799	391287	246331	64605.6	159978	94811.4	64758.7	92237.6	92393.3	81695.2	41987.2	0.279754	-1.83777	7.48916e-06
Eugenol	C10H12O2	366724	307306	281947	314430	291533	318799	391287	246331	64605.6	159978	94811.4	64758.7	92237.6	92393.3	81695.2	41987.2	0.279754	-1.83777	7.48916e-06
Isoeugenol	C10H12O2	366724	307306	281947	314430	291533	318799	391287	246331	64605.6	159978	94811.4	64758.7	92237.6	92393.3	81695.2	41987.2	0.279754	-1.83777	7.48916e-06
1,2-Dimethoxy-4-vinylbenzene	C10H12O2	366724	307306	281947	314430	291533	318799	391287	246331	64605.6	159978	94811.4	64758.7	92237.6	92393.3	81695.2	41987.2	0.279754	-1.83777	7.48916e-06
4-Methylbenzyl alcohol acetate	C10H12O2	366724	307306	281947	314430	291533	318799	391287	246331	64605.6	159978	94811.4	64758.7	92237.6	92393.3	81695.2	41987.2	0.279754	-1.83777	7.48916e-06
Benzyl propionate	C10H12O2	366724	307306	281947	314430	291533	318799	391287	246331	64605.6	159978	94811.4	64758.7	92237.6	92393.3	81695.2	41987.2	0.279754	-1.83777	7.48916e-06
Methyl 3-phenylpropanoate	C10H12O2	366724	307306	281947	314430	291533	318799	391287	246331	64605.6	159978	94811.4	64758.7	92237.6	92393.3	81695.2	41987.2	0.279754	-1.83777	7.48916e-06
Isopropyl benzoate	C10H12O2	366724	307306	281947	314430	291533	318799	391287	246331	64605.6	159978	94811.4	64758.7	92237.6	92393.3	81695.2	41987.2	0.279754	-1.83777	7.48916e-06
3-Hydroxy-4-phenylbutan-2-one	C10H12O2	366724	307306	281947	314430	291533	318799	391287	246331	64605.6	159978	94811.4	64758.7	92237.6	92393.3	81695.2	41987.2	0.279754	-1.83777	7.48916e-06
Isoegomaketone	C10H12O2	366724	307306	281947	314430	291533	318799	391287	246331	64605.6	159978	94811.4	64758.7	92237.6	92393.3	81695.2	41987.2	0.279754	-1.83777	7.48916e-06
(3-Methylphenyl)methyl acetate	C10H12O2	366724	307306	281947	314430	291533	318799	391287	246331	64605.6	159978	94811.4	64758.7	92237.6	92393.3	81695.2	41987.2	0.279754	-1.83777	7.48916e-06
2-Methylbenzyl alcohol acetate	C10H12O2	366724	307306	281947	314430	291533	318799	391287	246331	64605.6	159978	94811.4	64758.7	92237.6	92393.3	81695.2	41987.2	0.279754	-1.83777	7.48916e-06
Phenyl butyrate	C10H12O2	366724	307306	281947	314430	291533	318799	391287	246331	64605.6	159978	94811.4	64758.7	92237.6	92393.3	81695.2	41987.2	0.279754	-1.83777	7.48916e-06
Propyl benzoate	C10H12O2	366724	307306	281947	314430	291533	318799	391287	246331	64605.6	159978	94811.4	64758.7	92237.6	92393.3	81695.2	41987.2	0.279754	-1.83777	7.48916e-06
4-(4-Hydroxyphenyl)-2-butanone	C10H12O2	366724	307306	281947	314430	291533	318799	391287	246331	64605.6	159978	94811.4	64758.7	92237.6	92393.3	81695.2	41987.2	0.279754	-1.83777	7.48916e-06
p-Mentha-2,4(8)-dien-9,3-olide	C10H12O2	366724	307306	281947	314430	291533	318799	391287	246331	64605.6	159978	94811.4	64758.7	92237.6	92393.3	81695.2	41987.2	0.279754	-1.83777	7.48916e-06
4-Methyl-2-phenyl-1,3-dioxolane	C10H12O2	366724	307306	281947	314430	291533	318799	391287	246331	64605.6	159978	94811.4	64758.7	92237.6	92393.3	81695.2	41987.2	0.279754	-1.83777	7.48916e-06
1-(4-Methoxyphenyl)-2-propanone	C10H12O2	366724	307306	281947	314430	291533	318799	391287	246331	64605.6	159978	94811.4	64758.7	92237.6	92393.3	81695.2	41987.2	0.279754	-1.83777	7.48916e-06
Ethyl phenylacetate	C10H12O2	366724	307306	281947	314430	291533	318799	391287	246331	64605.6	159978	94811.4	64758.7	92237.6	92393.3	81695.2	41987.2	0.279754	-1.83777	7.48916e-06
1-Phenylethyl acetate	C10H12O2	366724	307306	281947	314430	291533	318799	391287	246331	64605.6	159978	94811.4	64758.7	92237.6	92393.3	81695.2	41987.2	0.279754	-1.83777	7.48916e-06
3-(4-Methoxyphenyl)-2-propen-1-ol	C10H12O2	366724	307306	281947	314430	291533	318799	391287	246331	64605.6	159978	94811.4	64758.7	92237.6	92393.3	81695.2	41987.2	0.279754	-1.83777	7.48916e-06
(2E,4E,6E)-2,6-Dimethylocta-2,4,6-trienedial	C10H12O2	366724	307306	281947	314430	291533	318799	391287	246331	64605.6	159978	94811.4	64758.7	92237.6	92393.3	81695.2	41987.2	0.279754	-1.83777	7.48916e-06
Dihydrosafrole	C10H12O2	366724	307306	281947	314430	291533	318799	391287	246331	64605.6	159978	94811.4	64758.7	92237.6	92393.3	81695.2	41987.2	0.279754	-1.83777	7.48916e-06
gamma-Thujaplicin	C10H12O2	366724	307306	281947	314430	291533	318799	391287	246331	64605.6	159978	94811.4	64758.7	92237.6	92393.3	81695.2	41987.2	0.279754	-1.83777	7.48916e-06
Evodone	C10H12O2	366724	307306	281947	314430	291533	318799	391287	246331	64605.6	159978	94811.4	64758.7	92237.6	92393.3	81695.2	41987.2	0.279754	-1.83777	7.48916e-06
2,4-decadiynoic acid	C10H12O2	366724	307306	281947	314430	291533	318799	391287	246331	64605.6	159978	94811.4	64758.7	92237.6	92393.3	81695.2	41987.2	0.279754	-1.83777	7.48916e-06
Imiquimod	C14H16N4	226530	198163	193236	179813	175852	219364	282947	122651	30928.7	39577.9	50810.5	29709.8	44853.9	42944.3	34570.5	42928.8	0.2108	-2.24606	0.000608359
(3R,3aR,7aS)-3-Butylhexahydro-1(3H)-isobenzofuranone	C12H20O2	76052.9	78752.7	65333.5	63889.2	66364.3	84609.9	92349.7	44671.4	33053.5	27211.6	33980.7	23951.8	24079.6	28141.2	29982.8	22653.6	0.388666	-1.3634	0.000876835
cis-3-Hexenyl cis-3-hexenoate	C12H20O2	76052.9	78752.7	65333.5	63889.2	66364.3	84609.9	92349.7	44671.4	33053.5	27211.6	33980.7	23951.8	24079.6	28141.2	29982.8	22653.6	0.388666	-1.3634	0.000876835
cis-3-Hexenyl trans-2-hexenoate	C12H20O2	76052.9	78752.7	65333.5	63889.2	66364.3	84609.9	92349.7	44671.4	33053.5	27211.6	33980.7	23951.8	24079.6	28141.2	29982.8	22653.6	0.388666	-1.3634	0.000876835
6-Heptyl-5,6-dihydro-2H-pyran-2-one	C12H20O2	76052.9	78752.7	65333.5	63889.2	66364.3	84609.9	92349.7	44671.4	33053.5	27211.6	33980.7	23951.8	24079.6	28141.2	29982.8	22653.6	0.388666	-1.3634	0.000876835
3,7-Dimethyl-2Z,6-octadienyl acetate	C12H20O2	76052.9	78752.7	65333.5	63889.2	66364.3	84609.9	92349.7	44671.4	33053.5	27211.6	33980.7	23951.8	24079.6	28141.2	29982.8	22653.6	0.388666	-1.3634	0.000876835
Linalyl acetate	C12H20O2	76052.9	78752.7	65333.5	63889.2	66364.3	84609.9	92349.7	44671.4	33053.5	27211.6	33980.7	23951.8	24079.6	28141.2	29982.8	22653.6	0.388666	-1.3634	0.000876835
Fenchyl acetate	C12H20O2	76052.9	78752.7	65333.5	63889.2	66364.3	84609.9	92349.7	44671.4	33053.5	27211.6	33980.7	23951.8	24079.6	28141.2	29982.8	22653.6	0.388666	-1.3634	0.000876835
Isopulegol acetate	C12H20O2	76052.9	78752.7	65333.5	63889.2	66364.3	84609.9	92349.7	44671.4	33053.5	27211.6	33980.7	23951.8	24079.6	28141.2	29982.8	22653.6	0.388666	-1.3634	0.000876835
Dihydro-5-(2-octenyl)-2(3H)-furanone	C12H20O2	76052.9	78752.7	65333.5	63889.2	66364.3	84609.9	92349.7	44671.4	33053.5	27211.6	33980.7	23951.8	24079.6	28141.2	29982.8	22653.6	0.388666	-1.3634	0.000876835
Allyl cyclohexylpropionate	C12H20O2	76052.9	78752.7	65333.5	63889.2	66364.3	84609.9	92349.7	44671.4	33053.5	27211.6	33980.7	23951.8	24079.6	28141.2	29982.8	22653.6	0.388666	-1.3634	0.000876835
Methyl 2-undecynoate	C12H20O2	76052.9	78752.7	65333.5	63889.2	66364.3	84609.9	92349.7	44671.4	33053.5	27211.6	33980.7	23951.8	24079.6	28141.2	29982.8	22653.6	0.388666	-1.3634	0.000876835
(-)-Bornyl acetate	C12H20O2	76052.9	78752.7	65333.5	63889.2	66364.3	84609.9	92349.7	44671.4	33053.5	27211.6	33980.7	23951.8	24079.6	28141.2	29982.8	22653.6	0.388666	-1.3634	0.000876835
alpha-Terpinyl acetate	C12H20O2	76052.9	78752.7	65333.5	63889.2	66364.3	84609.9	92349.7	44671.4	33053.5	27211.6	33980.7	23951.8	24079.6	28141.2	29982.8	22653.6	0.388666	-1.3634	0.000876835
alpha-Campholene acetate	C12H20O2	76052.9	78752.7	65333.5	63889.2	66364.3	84609.9	92349.7	44671.4	33053.5	27211.6	33980.7	23951.8	24079.6	28141.2	29982.8	22653.6	0.388666	-1.3634	0.000876835
(Z)-4-Hydroxy-6-dodecenoic acid lactone	C12H20O2	76052.9	78752.7	65333.5	63889.2	66364.3	84609.9	92349.7	44671.4	33053.5	27211.6	33980.7	23951.8	24079.6	28141.2	29982.8	22653.6	0.388666	-1.3634	0.000876835
3,7-Dimethyl-2,6-octadien-1-ylacetate	C12H20O2	76052.9	78752.7	65333.5	63889.2	66364.3	84609.9	92349.7	44671.4	33053.5	27211.6	33980.7	23951.8	24079.6	28141.2	29982.8	22653.6	0.388666	-1.3634	0.000876835
ethyl 2E,4Z-decadienoate	C12H20O2	76052.9	78752.7	65333.5	63889.2	66364.3	84609.9	92349.7	44671.4	33053.5	27211.6	33980.7	23951.8	24079.6	28141.2	29982.8	22653.6	0.388666	-1.3634	0.000876835
Artemisia alcohol acetate	C12H20O2	76052.9	78752.7	65333.5	63889.2	66364.3	84609.9	92349.7	44671.4	33053.5	27211.6	33980.7	23951.8	24079.6	28141.2	29982.8	22653.6	0.388666	-1.3634	0.000876835
Dihydrocarveol acetate	C12H20O2	76052.9	78752.7	65333.5	63889.2	66364.3	84609.9	92349.7	44671.4	33053.5	27211.6	33980.7	23951.8	24079.6	28141.2	29982.8	22653.6	0.388666	-1.3634	0.000876835
(S)-Santolina acetate	C12H20O2	76052.9	78752.7	65333.5	63889.2	66364.3	84609.9	92349.7	44671.4	33053.5	27211.6	33980.7	23951.8	24079.6	28141.2	29982.8	22653.6	0.388666	-1.3634	0.000876835
cis-3-Hexenyl trans-4-hexenoate	C12H20O2	76052.9	78752.7	65333.5	63889.2	66364.3	84609.9	92349.7	44671.4	33053.5	27211.6	33980.7	23951.8	24079.6	28141.2	29982.8	22653.6	0.388666	-1.3634	0.000876835
p-Menth-1-en-9-ol acetate	C12H20O2	76052.9	78752.7	65333.5	63889.2	66364.3	84609.9	92349.7	44671.4	33053.5	27211.6	33980.7	23951.8	24079.6	28141.2	29982.8	22653.6	0.388666	-1.3634	0.000876835
Yuzu lactone	C12H20O2	76052.9	78752.7	65333.5	63889.2	66364.3	84609.9	92349.7	44671.4	33053.5	27211.6	33980.7	23951.8	24079.6	28141.2	29982.8	22653.6	0.388666	-1.3634	0.000876835
(1S,2R,4S)-(-)-Bornyl acetate	C12H20O2	76052.9	78752.7	65333.5	63889.2	66364.3	84609.9	92349.7	44671.4	33053.5	27211.6	33980.7	23951.8	24079.6	28141.2	29982.8	22653.6	0.388666	-1.3634	0.000876835
3,7-Dimethyl-2E,6-octadienyl acetate	C12H20O2	76052.9	78752.7	65333.5	63889.2	66364.3	84609.9	92349.7	44671.4	33053.5	27211.6	33980.7	23951.8	24079.6	28141.2	29982.8	22653.6	0.388666	-1.3634	0.000876835
Linalyl acetate	C12H20O2	76052.9	78752.7	65333.5	63889.2	66364.3	84609.9	92349.7	44671.4	33053.5	27211.6	33980.7	23951.8	24079.6	28141.2	29982.8	22653.6	0.388666	-1.3634	0.000876835
beta-Terpinyl acetate	C12H20O2	76052.9	78752.7	65333.5	63889.2	66364.3	84609.9	92349.7	44671.4	33053.5	27211.6	33980.7	23951.8	24079.6	28141.2	29982.8	22653.6	0.388666	-1.3634	0.000876835
gamma-Terpinyl acetate	C12H20O2	76052.9	78752.7	65333.5	63889.2	66364.3	84609.9	92349.7	44671.4	33053.5	27211.6	33980.7	23951.8	24079.6	28141.2	29982.8	22653.6	0.388666	-1.3634	0.000876835
(1R,2S,4R)-(+)-Bornyl acetate	C12H20O2	76052.9	78752.7	65333.5	63889.2	66364.3	84609.9	92349.7	44671.4	33053.5	27211.6	33980.7	23951.8	24079.6	28141.2	29982.8	22653.6	0.388666	-1.3634	0.000876835
8E-Hydroxy-4,8-dimethyl-4,9-decadienal	C12H20O2	76052.9	78752.7	65333.5	63889.2	66364.3	84609.9	92349.7	44671.4	33053.5	27211.6	33980.7	23951.8	24079.6	28141.2	29982.8	22653.6	0.388666	-1.3634	0.000876835
7Z,9-Decadienyl acetate	C12H20O2	76052.9	78752.7	65333.5	63889.2	66364.3	84609.9	92349.7	44671.4	33053.5	27211.6	33980.7	23951.8	24079.6	28141.2	29982.8	22653.6	0.388666	-1.3634	0.000876835
3E,5E-Decadienyl acetate	C12H20O2	76052.9	78752.7	65333.5	63889.2	66364.3	84609.9	92349.7	44671.4	33053.5	27211.6	33980.7	23951.8	24079.6	28141.2	29982.8	22653.6	0.388666	-1.3634	0.000876835
3Z,5E-Decadienyl acetate	C12H20O2	76052.9	78752.7	65333.5	63889.2	66364.3	84609.9	92349.7	44671.4	33053.5	27211.6	33980.7	23951.8	24079.6	28141.2	29982.8	22653.6	0.388666	-1.3634	0.000876835
Isopropyl 2,4-dimethyl-2E,4E-heptadienoate	C12H20O2	76052.9	78752.7	65333.5	63889.2	66364.3	84609.9	92349.7	44671.4	33053.5	27211.6	33980.7	23951.8	24079.6	28141.2	29982.8	22653.6	0.388666	-1.3634	0.000876835
(E)-2-Hexenyl (E)-2-hexenoate	C12H20O2	76052.9	78752.7	65333.5	63889.2	66364.3	84609.9	92349.7	44671.4	33053.5	27211.6	33980.7	23951.8	24079.6	28141.2	29982.8	22653.6	0.388666	-1.3634	0.000876835
(E)-2-Hexenyl (Z)-3-hexenoate	C12H20O2	76052.9	78752.7	65333.5	63889.2	66364.3	84609.9	92349.7	44671.4	33053.5	27211.6	33980.7	23951.8	24079.6	28141.2	29982.8	22653.6	0.388666	-1.3634	0.000876835
Ethyl (E)-7,9-decadienoate	C12H20O2	76052.9	78752.7	65333.5	63889.2	66364.3	84609.9	92349.7	44671.4	33053.5	27211.6	33980.7	23951.8	24079.6	28141.2	29982.8	22653.6	0.388666	-1.3634	0.000876835
Buibuilactone	C12H20O2	76052.9	78752.7	65333.5	63889.2	66364.3	84609.9	92349.7	44671.4	33053.5	27211.6	33980.7	23951.8	24079.6	28141.2	29982.8	22653.6	0.388666	-1.3634	0.000876835
Cucujolide II	C12H20O2	76052.9	78752.7	65333.5	63889.2	66364.3	84609.9	92349.7	44671.4	33053.5	27211.6	33980.7	23951.8	24079.6	28141.2	29982.8	22653.6	0.388666	-1.3634	0.000876835
Cucujolide VIII	C12H20O2	76052.9	78752.7	65333.5	63889.2	66364.3	84609.9	92349.7	44671.4	33053.5	27211.6	33980.7	23951.8	24079.6	28141.2	29982.8	22653.6	0.388666	-1.3634	0.000876835
S-Cucujolide II	C12H20O2	76052.9	78752.7	65333.5	63889.2	66364.3	84609.9	92349.7	44671.4	33053.5	27211.6	33980.7	23951.8	24079.6	28141.2	29982.8	22653.6	0.388666	-1.3634	0.000876835
5-Dodecen-11-olide	C12H20O2	76052.9	78752.7	65333.5	63889.2	66364.3	84609.9	92349.7	44671.4	33053.5	27211.6	33980.7	23951.8	24079.6	28141.2	29982.8	22653.6	0.388666	-1.3634	0.000876835
9-dodecynoic acid	C12H20O2	76052.9	78752.7	65333.5	63889.2	66364.3	84609.9	92349.7	44671.4	33053.5	27211.6	33980.7	23951.8	24079.6	28141.2	29982.8	22653.6	0.388666	-1.3634	0.000876835
8-dodecynoic acid	C12H20O2	76052.9	78752.7	65333.5	63889.2	66364.3	84609.9	92349.7	44671.4	33053.5	27211.6	33980.7	23951.8	24079.6	28141.2	29982.8	22653.6	0.388666	-1.3634	0.000876835
7-dodecynoic acid	C12H20O2	76052.9	78752.7	65333.5	63889.2	66364.3	84609.9	92349.7	44671.4	33053.5	27211.6	33980.7	23951.8	24079.6	28141.2	29982.8	22653.6	0.388666	-1.3634	0.000876835
6-dodecynoic acid	C12H20O2	76052.9	78752.7	65333.5	63889.2	66364.3	84609.9	92349.7	44671.4	33053.5	27211.6	33980.7	23951.8	24079.6	28141.2	29982.8	22653.6	0.388666	-1.3634	0.000876835
5-dodecynoic acid	C12H20O2	76052.9	78752.7	65333.5	63889.2	66364.3	84609.9	92349.7	44671.4	33053.5	27211.6	33980.7	23951.8	24079.6	28141.2	29982.8	22653.6	0.388666	-1.3634	0.000876835
4-dodecynoic acid	C12H20O2	76052.9	78752.7	65333.5	63889.2	66364.3	84609.9	92349.7	44671.4	33053.5	27211.6	33980.7	23951.8	24079.6	28141.2	29982.8	22653.6	0.388666	-1.3634	0.000876835
3-dodecynoic acid	C12H20O2	76052.9	78752.7	65333.5	63889.2	66364.3	84609.9	92349.7	44671.4	33053.5	27211.6	33980.7	23951.8	24079.6	28141.2	29982.8	22653.6	0.388666	-1.3634	0.000876835
11-dodecynoic acid	C12H20O2	76052.9	78752.7	65333.5	63889.2	66364.3	84609.9	92349.7	44671.4	33053.5	27211.6	33980.7	23951.8	24079.6	28141.2	29982.8	22653.6	0.388666	-1.3634	0.000876835
10-dodecynoic acid	C12H20O2	76052.9	78752.7	65333.5	63889.2	66364.3	84609.9	92349.7	44671.4	33053.5	27211.6	33980.7	23951.8	24079.6	28141.2	29982.8	22653.6	0.388666	-1.3634	0.000876835
cis,cis-dodeca-3,6-dienoic acid	C12H20O2	76052.9	78752.7	65333.5	63889.2	66364.3	84609.9	92349.7	44671.4	33053.5	27211.6	33980.7	23951.8	24079.6	28141.2	29982.8	22653.6	0.388666	-1.3634	0.000876835
2E,4E-dodecadienoic acid	C12H20O2	76052.9	78752.7	65333.5	63889.2	66364.3	84609.9	92349.7	44671.4	33053.5	27211.6	33980.7	23951.8	24079.6	28141.2	29982.8	22653.6	0.388666	-1.3634	0.000876835
2Z,8E-dodecadienoic acid	C12H20O2	76052.9	78752.7	65333.5	63889.2	66364.3	84609.9	92349.7	44671.4	33053.5	27211.6	33980.7	23951.8	24079.6	28141.2	29982.8	22653.6	0.388666	-1.3634	0.000876835
2E,8Z-dodecadienoic acid	C12H20O2	76052.9	78752.7	65333.5	63889.2	66364.3	84609.9	92349.7	44671.4	33053.5	27211.6	33980.7	23951.8	24079.6	28141.2	29982.8	22653.6	0.388666	-1.3634	0.000876835
2E,8E-dodecadienoic acid	C12H20O2	76052.9	78752.7	65333.5	63889.2	66364.3	84609.9	92349.7	44671.4	33053.5	27211.6	33980.7	23951.8	24079.6	28141.2	29982.8	22653.6	0.388666	-1.3634	0.000876835
2E,6Z-dodecadienoic acid	C12H20O2	76052.9	78752.7	65333.5	63889.2	66364.3	84609.9	92349.7	44671.4	33053.5	27211.6	33980.7	23951.8	24079.6	28141.2	29982.8	22653.6	0.388666	-1.3634	0.000876835
8E,10E-dodecadienoic acid	C12H20O2	76052.9	78752.7	65333.5	63889.2	66364.3	84609.9	92349.7	44671.4	33053.5	27211.6	33980.7	23951.8	24079.6	28141.2	29982.8	22653.6	0.388666	-1.3634	0.000876835
7Z,9E-dodecadienoic acid	C12H20O2	76052.9	78752.7	65333.5	63889.2	66364.3	84609.9	92349.7	44671.4	33053.5	27211.6	33980.7	23951.8	24079.6	28141.2	29982.8	22653.6	0.388666	-1.3634	0.000876835
5E,7E-dodecadienoic acid	C12H20O2	76052.9	78752.7	65333.5	63889.2	66364.3	84609.9	92349.7	44671.4	33053.5	27211.6	33980.7	23951.8	24079.6	28141.2	29982.8	22653.6	0.388666	-1.3634	0.000876835
2Z,8Z-dodecadienoic acid	C12H20O2	76052.9	78752.7	65333.5	63889.2	66364.3	84609.9	92349.7	44671.4	33053.5	27211.6	33980.7	23951.8	24079.6	28141.2	29982.8	22653.6	0.388666	-1.3634	0.000876835
8Z,10E-dodecadienoic acid	C12H20O2	76052.9	78752.7	65333.5	63889.2	66364.3	84609.9	92349.7	44671.4	33053.5	27211.6	33980.7	23951.8	24079.6	28141.2	29982.8	22653.6	0.388666	-1.3634	0.000876835
Aleprylic acid	C12H20O2	76052.9	78752.7	65333.5	63889.2	66364.3	84609.9	92349.7	44671.4	33053.5	27211.6	33980.7	23951.8	24079.6	28141.2	29982.8	22653.6	0.388666	-1.3634	0.000876835
cis-3-Hexenyl pyruvate	C9H14O3	348243	448720	255164	319404	201191	346643	259262	99367.5	161978	149628	173032	114397	137476	120120	117395	141933	0.482851	-1.05035	0.0428587
1,4-Ipomeadiol	C9H14O3	348243	448720	255164	319404	201191	346643	259262	99367.5	161978	149628	173032	114397	137476	120120	117395	141933	0.482851	-1.05035	0.0428587
Furfural diethyl acetal	C9H14O3	348243	448720	255164	319404	201191	346643	259262	99367.5	161978	149628	173032	114397	137476	120120	117395	141933	0.482851	-1.05035	0.0428587
Phaseolic acid	C12H22O6	199936	214855	108925	185931	87553.5	181155	137640	55541.1	45617.8	0	76155.1	0	33375.4	14616.1	61364.8	34480.5	0.212852	-2.23208	0.00527095
Triethylene glycol diglycidyl ether	C12H22O6	199936	214855	108925	185931	87553.5	181155	137640	55541.1	45617.8	0	76155.1	0	33375.4	14616.1	61364.8	34480.5	0.212852	-2.23208	0.00527095
3R-hydroxy-hexanoic acid	C6H12O3	467726	339154	344064	309472	264954	371445	366957	203836	166687	134491	124153	123728	161910	106824	133250	127535	0.381701	-1.38948	0.00177389
5R-hydroxy-hexanoic acid	C6H12O3	467726	339154	344064	309472	264954	371445	366957	203836	166687	134491	124153	123728	161910	106824	133250	127535	0.381701	-1.38948	0.00177389
5-hydroxy caproic acid	C6H12O3	467726	339154	344064	309472	264954	371445	366957	203836	166687	134491	124153	123728	161910	106824	133250	127535	0.381701	-1.38948	0.00177389
D-Leucic acid	C6H12O3	467726	339154	344064	309472	264954	371445	366957	203836	166687	134491	124153	123728	161910	106824	133250	127535	0.381701	-1.38948	0.00177389
Leucinic acid	C6H12O3	467726	339154	344064	309472	264954	371445	366957	203836	166687	134491	124153	123728	161910	106824	133250	127535	0.381701	-1.38948	0.00177389
hydroxy-isocaproic acid	C6H12O3	467726	339154	344064	309472	264954	371445	366957	203836	166687	134491	124153	123728	161910	106824	133250	127535	0.381701	-1.38948	0.00177389
2-hydroxy-3-methyl-pentanoic acid	C6H12O3	467726	339154	344064	309472	264954	371445	366957	203836	166687	134491	124153	123728	161910	106824	133250	127535	0.381701	-1.38948	0.00177389
4,4-Dimethoxy-2-butanone	C6H12O3	467726	339154	344064	309472	264954	371445	366957	203836	166687	134491	124153	123728	161910	106824	133250	127535	0.381701	-1.38948	0.00177389
Threo-3-Hydroxy-2-methylbutyric acid	C6H12O3	467726	339154	344064	309472	264954	371445	366957	203836	166687	134491	124153	123728	161910	106824	133250	127535	0.381701	-1.38948	0.00177389
2-ethyl-2-hydroxy-butyric acid	C6H12O3	467726	339154	344064	309472	264954	371445	366957	203836	166687	134491	124153	123728	161910	106824	133250	127535	0.381701	-1.38948	0.00177389
DL-2-hydroxy caproic acid	C6H12O3	467726	339154	344064	309472	264954	371445	366957	203836	166687	134491	124153	123728	161910	106824	133250	127535	0.381701	-1.38948	0.00177389
Ethyl (±)-3-hydroxybutyrate	C6H12O3	467726	339154	344064	309472	264954	371445	366957	203836	166687	134491	124153	123728	161910	106824	133250	127535	0.381701	-1.38948	0.00177389
2-Methyl-3-hydroxyvaleric acid	C6H12O3	467726	339154	344064	309472	264954	371445	366957	203836	166687	134491	124153	123728	161910	106824	133250	127535	0.381701	-1.38948	0.00177389
(+/-)-1-Acetoxy-1-ethoxyethane	C6H12O3	467726	339154	344064	309472	264954	371445	366957	203836	166687	134491	124153	123728	161910	106824	133250	127535	0.381701	-1.38948	0.00177389
6-Hydroxyhexanoic acid	C6H12O3	467726	339154	344064	309472	264954	371445	366957	203836	166687	134491	124153	123728	161910	106824	133250	127535	0.381701	-1.38948	0.00177389
DL-3-hydroxy caproic acid	C6H12O3	467726	339154	344064	309472	264954	371445	366957	203836	166687	134491	124153	123728	161910	106824	133250	127535	0.381701	-1.38948	0.00177389
Butoxyacetic acid	C6H12O3	467726	339154	344064	309472	264954	371445	366957	203836	166687	134491	124153	123728	161910	106824	133250	127535	0.381701	-1.38948	0.00177389
Paraldehyde	C6H12O3	467726	339154	344064	309472	264954	371445	366957	203836	166687	134491	124153	123728	161910	106824	133250	127535	0.381701	-1.38948	0.00177389
Ethyl (R)-3-hydroxybutanoate	C6H12O3	467726	339154	344064	309472	264954	371445	366957	203836	166687	134491	124153	123728	161910	106824	133250	127535	0.381701	-1.38948	0.00177389
DL-4-hydroxy caproic acid	C6H12O3	467726	339154	344064	309472	264954	371445	366957	203836	166687	134491	124153	123728	161910	106824	133250	127535	0.381701	-1.38948	0.00177389
N-Decanoylglycine	C12H23NO3	85753.5	148495	85632.1	119366	97100.5	117070	179482	110440	53124.9	25069.6	65756	0	36361.8	0	132485	39023.6	0.331349	-1.59357	0.014903
3b-Hydroxy-6b-methoxy-7(11)-eremophilen-12,8a-olide	C16H24O4	61046.3	78017.9	78845.5	64957.7	73787.2	74201.5	80271.7	38739.4	29895.4	38204	39700.8	27877.5	58403.4	25488.2	28184.7	54948.9	0.460166	-1.11977	0.00385679
Prehumulinic acid	C16H24O4	61046.3	78017.9	78845.5	64957.7	73787.2	74201.5	80271.7	38739.4	29895.4	38204	39700.8	27877.5	58403.4	25488.2	28184.7	54948.9	0.460166	-1.11977	0.00385679
6b-Hydroxy-8a-methoxy-7(11)-eremophilen-12,8-olide	C16H24O4	61046.3	78017.9	78845.5	64957.7	73787.2	74201.5	80271.7	38739.4	29895.4	38204	39700.8	27877.5	58403.4	25488.2	28184.7	54948.9	0.460166	-1.11977	0.00385679
Methyl (3b,11x)-3-Hydroxy-8-oxo-6-eremophilen-12-oate	C16H24O4	61046.3	78017.9	78845.5	64957.7	73787.2	74201.5	80271.7	38739.4	29895.4	38204	39700.8	27877.5	58403.4	25488.2	28184.7	54948.9	0.460166	-1.11977	0.00385679
3,4-Epoxy-6-methylcyclohexylmethyl-3,4-epoxy-6-methylcyclo-hexanecarboxylate	C16H24O4	61046.3	78017.9	78845.5	64957.7	73787.2	74201.5	80271.7	38739.4	29895.4	38204	39700.8	27877.5	58403.4	25488.2	28184.7	54948.9	0.460166	-1.11977	0.00385679
1-(3,4-Dihydroxyphenyl)-5-hydroxy-3-decanone	C16H24O4	61046.3	78017.9	78845.5	64957.7	73787.2	74201.5	80271.7	38739.4	29895.4	38204	39700.8	27877.5	58403.4	25488.2	28184.7	54948.9	0.460166	-1.11977	0.00385679

## Sheet: 5post-S vs. 5post-C 
List of significant metabolites based on fc and q values between 5post-S vs. 5post-C
Name	Formula	5post-C1	5post-C2	5post-C3	5post-C4	5post-C5	5post-C6	5post-C7	5post-C8	5post-S1	5post-S2	5post-S3	5post-S4	5post-S5	5post-S6	5post-S7	5post-S8	FC.5.PPOST	LOG.5.PPOST	q
N,2,3-Trimethyl-2-(1-methylethyl)butanamide	C10H21NO	176381	154981	116893	137555	130602	128166	166033	130682	547077	621509	971332	521740	833144	446294	911128	888286	5.42302	2.4391	0.00152359
decanamide	C10H21NO	176381	154981	116893	137555	130602	128166	166033	130682	547077	621509	971332	521740	833144	446294	911128	888286	5.42302	2.4391	0.00152359
Diisopropyl phosphate	C6H15O4P	48445	36710.7	39454	34408.1	35300	17188.4	35929.3	37871.9	75220.9	102608	75787.1	70662.4	136407	68918.2	79162.3	82725	2.13311	1.09296	0.0031295
Caproic acid	C6H12O2	2.30287e+06	2725161	2.07744e+06	2.60667e+06	2.36361e+06	2.30766e+06	2.52162e+06	2.78959e+06	7724876	5.77302e+06	6.29438e+06	9249604	6438952	11467316	6533519	5566687	2.65544	1.40895	0.00307981
Isocaproic acid	C6H12O2	2.30287e+06	2725161	2.07744e+06	2.60667e+06	2.36361e+06	2.30766e+06	2.52162e+06	2.78959e+06	7724876	5.77302e+06	6.29438e+06	9249604	6438952	11467316	6533519	5566687	2.65544	1.40895	0.00307981
Isoamyl formate	C6H12O2	2.30287e+06	2725161	2.07744e+06	2.60667e+06	2.36361e+06	2.30766e+06	2.52162e+06	2.78959e+06	7724876	5.77302e+06	6.29438e+06	9249604	6438952	11467316	6533519	5566687	2.65544	1.40895	0.00307981
3-methyl valeric acid	C6H12O2	2.30287e+06	2725161	2.07744e+06	2.60667e+06	2.36361e+06	2.30766e+06	2.52162e+06	2.78959e+06	7724876	5.77302e+06	6.29438e+06	9249604	6438952	11467316	6533519	5566687	2.65544	1.40895	0.00307981
Ethyl butyrate	C6H12O2	2.30287e+06	2725161	2.07744e+06	2.60667e+06	2.36361e+06	2.30766e+06	2.52162e+06	2.78959e+06	7724876	5.77302e+06	6.29438e+06	9249604	6438952	11467316	6533519	5566687	2.65544	1.40895	0.00307981
Methyl (S)-2-Methylbutanoate	C6H12O2	2.30287e+06	2725161	2.07744e+06	2.60667e+06	2.36361e+06	2.30766e+06	2.52162e+06	2.78959e+06	7724876	5.77302e+06	6.29438e+06	9249604	6438952	11467316	6533519	5566687	2.65544	1.40895	0.00307981
Pentyl formate	C6H12O2	2.30287e+06	2725161	2.07744e+06	2.60667e+06	2.36361e+06	2.30766e+06	2.52162e+06	2.78959e+06	7724876	5.77302e+06	6.29438e+06	9249604	6438952	11467316	6533519	5566687	2.65544	1.40895	0.00307981
2,4,5-Trimethyl-1,3-dioxolane	C6H12O2	2.30287e+06	2725161	2.07744e+06	2.60667e+06	2.36361e+06	2.30766e+06	2.52162e+06	2.78959e+06	7724876	5.77302e+06	6.29438e+06	9249604	6438952	11467316	6533519	5566687	2.65544	1.40895	0.00307981
Methyl 3-methylbutanoate	C6H12O2	2.30287e+06	2725161	2.07744e+06	2.60667e+06	2.36361e+06	2.30766e+06	2.52162e+06	2.78959e+06	7724876	5.77302e+06	6.29438e+06	9249604	6438952	11467316	6533519	5566687	2.65544	1.40895	0.00307981
propyl propionate	C6H12O2	2.30287e+06	2725161	2.07744e+06	2.60667e+06	2.36361e+06	2.30766e+06	2.52162e+06	2.78959e+06	7724876	5.77302e+06	6.29438e+06	9249604	6438952	11467316	6533519	5566687	2.65544	1.40895	0.00307981
Isopropyl propionate	C6H12O2	2.30287e+06	2725161	2.07744e+06	2.60667e+06	2.36361e+06	2.30766e+06	2.52162e+06	2.78959e+06	7724876	5.77302e+06	6.29438e+06	9249604	6438952	11467316	6533519	5566687	2.65544	1.40895	0.00307981
2-methyl valeric acid	C6H12O2	2.30287e+06	2725161	2.07744e+06	2.60667e+06	2.36361e+06	2.30766e+06	2.52162e+06	2.78959e+06	7724876	5.77302e+06	6.29438e+06	9249604	6438952	11467316	6533519	5566687	2.65544	1.40895	0.00307981
ethyl 2-methyl-propionyl	C6H12O2	2.30287e+06	2725161	2.07744e+06	2.60667e+06	2.36361e+06	2.30766e+06	2.52162e+06	2.78959e+06	7724876	5.77302e+06	6.29438e+06	9249604	6438952	11467316	6533519	5566687	2.65544	1.40895	0.00307981
2-Methylpropyl acetate	C6H12O2	2.30287e+06	2725161	2.07744e+06	2.60667e+06	2.36361e+06	2.30766e+06	2.52162e+06	2.78959e+06	7724876	5.77302e+06	6.29438e+06	9249604	6438952	11467316	6533519	5566687	2.65544	1.40895	0.00307981
Methyl pentanoate	C6H12O2	2.30287e+06	2725161	2.07744e+06	2.60667e+06	2.36361e+06	2.30766e+06	2.52162e+06	2.78959e+06	7724876	5.77302e+06	6.29438e+06	9249604	6438952	11467316	6533519	5566687	2.65544	1.40895	0.00307981
diethyl acetic acid	C6H12O2	2.30287e+06	2725161	2.07744e+06	2.60667e+06	2.36361e+06	2.30766e+06	2.52162e+06	2.78959e+06	7724876	5.77302e+06	6.29438e+06	9249604	6438952	11467316	6533519	5566687	2.65544	1.40895	0.00307981
n-Butyl acetate	C6H12O2	2.30287e+06	2725161	2.07744e+06	2.60667e+06	2.36361e+06	2.30766e+06	2.52162e+06	2.78959e+06	7724876	5.77302e+06	6.29438e+06	9249604	6438952	11467316	6533519	5566687	2.65544	1.40895	0.00307981
4-Hydroxy-4-methylpentan-2-one	C6H12O2	2.30287e+06	2725161	2.07744e+06	2.60667e+06	2.36361e+06	2.30766e+06	2.52162e+06	2.78959e+06	7724876	5.77302e+06	6.29438e+06	9249604	6438952	11467316	6533519	5566687	2.65544	1.40895	0.00307981
2,2,4-Trimethyl-1,3-dioxolane	C6H12O2	2.30287e+06	2725161	2.07744e+06	2.60667e+06	2.36361e+06	2.30766e+06	2.52162e+06	2.78959e+06	7724876	5.77302e+06	6.29438e+06	9249604	6438952	11467316	6533519	5566687	2.65544	1.40895	0.00307981
cis-1,2-Cyclohexanediol	C6H12O2	2.30287e+06	2725161	2.07744e+06	2.60667e+06	2.36361e+06	2.30766e+06	2.52162e+06	2.78959e+06	7724876	5.77302e+06	6.29438e+06	9249604	6438952	11467316	6533519	5566687	2.65544	1.40895	0.00307981
4-Hydroxyhexan-3-one	C6H12O2	2.30287e+06	2725161	2.07744e+06	2.60667e+06	2.36361e+06	2.30766e+06	2.52162e+06	2.78959e+06	7724876	5.77302e+06	6.29438e+06	9249604	6438952	11467316	6533519	5566687	2.65544	1.40895	0.00307981
trans-1,2-Cyclohexanediol	C6H12O2	2.30287e+06	2725161	2.07744e+06	2.60667e+06	2.36361e+06	2.30766e+06	2.52162e+06	2.78959e+06	7724876	5.77302e+06	6.29438e+06	9249604	6438952	11467316	6533519	5566687	2.65544	1.40895	0.00307981
3-Hydroxyhexanal	C6H12O2	2.30287e+06	2725161	2.07744e+06	2.60667e+06	2.36361e+06	2.30766e+06	2.52162e+06	2.78959e+06	7724876	5.77302e+06	6.29438e+06	9249604	6438952	11467316	6533519	5566687	2.65544	1.40895	0.00307981
3,3-dimethyl-butanoic acid	C6H12O2	2.30287e+06	2725161	2.07744e+06	2.60667e+06	2.36361e+06	2.30766e+06	2.52162e+06	2.78959e+06	7724876	5.77302e+06	6.29438e+06	9249604	6438952	11467316	6533519	5566687	2.65544	1.40895	0.00307981
dimethyl ethyl acetic acid	C6H12O2	2.30287e+06	2725161	2.07744e+06	2.60667e+06	2.36361e+06	2.30766e+06	2.52162e+06	2.78959e+06	7724876	5.77302e+06	6.29438e+06	9249604	6438952	11467316	6533519	5566687	2.65544	1.40895	0.00307981
2-hydroxy caproaldehyde	C6H12O2	2.30287e+06	2725161	2.07744e+06	2.60667e+06	2.36361e+06	2.30766e+06	2.52162e+06	2.78959e+06	7724876	5.77302e+06	6.29438e+06	9249604	6438952	11467316	6533519	5566687	2.65544	1.40895	0.00307981
4-hydroxy caproaldehyde	C6H12O2	2.30287e+06	2725161	2.07744e+06	2.60667e+06	2.36361e+06	2.30766e+06	2.52162e+06	2.78959e+06	7724876	5.77302e+06	6.29438e+06	9249604	6438952	11467316	6533519	5566687	2.65544	1.40895	0.00307981
5-hydroxy caproaldehyde	C6H12O2	2.30287e+06	2725161	2.07744e+06	2.60667e+06	2.36361e+06	2.30766e+06	2.52162e+06	2.78959e+06	7724876	5.77302e+06	6.29438e+06	9249604	6438952	11467316	6533519	5566687	2.65544	1.40895	0.00307981
6-hydroxy caproaldehyde	C6H12O2	2.30287e+06	2725161	2.07744e+06	2.60667e+06	2.36361e+06	2.30766e+06	2.52162e+06	2.78959e+06	7724876	5.77302e+06	6.29438e+06	9249604	6438952	11467316	6533519	5566687	2.65544	1.40895	0.00307981
2S-Hydroxyhexan-3-one	C6H12O2	2.30287e+06	2725161	2.07744e+06	2.60667e+06	2.36361e+06	2.30766e+06	2.52162e+06	2.78959e+06	7724876	5.77302e+06	6.29438e+06	9249604	6438952	11467316	6533519	5566687	2.65544	1.40895	0.00307981
3R-Hydroxyhexan-2-one	C6H12O2	2.30287e+06	2725161	2.07744e+06	2.60667e+06	2.36361e+06	2.30766e+06	2.52162e+06	2.78959e+06	7724876	5.77302e+06	6.29438e+06	9249604	6438952	11467316	6533519	5566687	2.65544	1.40895	0.00307981
3S-Hydroxyhexan-2-one	C6H12O2	2.30287e+06	2725161	2.07744e+06	2.60667e+06	2.36361e+06	2.30766e+06	2.52162e+06	2.78959e+06	7724876	5.77302e+06	6.29438e+06	9249604	6438952	11467316	6533519	5566687	2.65544	1.40895	0.00307981
2-Hydroxyhexan-3-one	C6H12O2	2.30287e+06	2725161	2.07744e+06	2.60667e+06	2.36361e+06	2.30766e+06	2.52162e+06	2.78959e+06	7724876	5.77302e+06	6.29438e+06	9249604	6438952	11467316	6533519	5566687	2.65544	1.40895	0.00307981
Glycerol	C3H8O3	2.3381e+06	2.71783e+06	2.75241e+06	2.84359e+06	2536608	2517341	3812270	2.95679e+06	7.968e+06	7.84954e+06	8331693	8607980	7.34288e+06	9327622	7.9998e+06	8453260	2.98552	1.57798	1.35551e-07
1,2,3-Tris(1-ethoxyethoxy)propane	C15H32O6	878981	903594	781750	621242	854302	995793	1.23106e+06	1.38992e+06	25763.9	60376.4	151612	194541	75223.6	155285	143440	64453.4	0.122667	-3.02718	0.000263578
N-Hexadecanoylpyrrolidine	C20H39NO	518805	548252	306502	268877	487711	438563	405205	613281	111690	210137	236584	294195	89066.1	336799	107219	156655	0.395987	-1.33648	0.00395427
4,5-Dihydrovomifoliol	C13H22O3	189644	217160	160240	222896	185226	180942	235185	240435	51520.5	99777.2	108779	81235.9	97500.3	67028.6	72678	84199.8	0.406672	-1.29806	1.78414e-05
Methyl dihydrojasmonate	C13H22O3	189644	217160	160240	222896	185226	180942	235185	240435	51520.5	99777.2	108779	81235.9	97500.3	67028.6	72678	84199.8	0.406672	-1.29806	1.78414e-05
Riesling acetal	C13H22O3	189644	217160	160240	222896	185226	180942	235185	240435	51520.5	99777.2	108779	81235.9	97500.3	67028.6	72678	84199.8	0.406672	-1.29806	1.78414e-05
Artemether	C16H26O5	384391	335041	238942	260421	311562	369025	540246	369486	73865.7	131835	126577	64244.8	46973.3	152867	284510	75450.8	0.286944	-1.80116	0.00162908
Tetranor-PGE1	C16H26O5	384391	335041	238942	260421	311562	369025	540246	369486	73865.7	131835	126577	64244.8	46973.3	152867	284510	75450.8	0.286944	-1.80116	0.00162908
Tetranor-PGD1	C16H26O5	384391	335041	238942	260421	311562	369025	540246	369486	73865.7	131835	126577	64244.8	46973.3	152867	284510	75450.8	0.286944	-1.80116	0.00162908
Valdiate	C17H26O5	156459	186728	154629	134024	177965	131500	195479	196752	61347.9	62386.3	91735.6	34273.4	28938	94554.4	178946	40601.4	0.369992	-1.43444	0.00703739
3-Hydroxy-6,8-dimethoxy-7(11)-eremophilen-12,8-olide	C17H26O5	156459	186728	154629	134024	177965	131500	195479	196752	61347.9	62386.3	91735.6	34273.4	28938	94554.4	178946	40601.4	0.369992	-1.43444	0.00703739
Botrydial	C17H26O5	156459	186728	154629	134024	177965	131500	195479	196752	61347.9	62386.3	91735.6	34273.4	28938	94554.4	178946	40601.4	0.369992	-1.43444	0.00703739
methyl 8-[2-(2-formyl-vinyl)-3-hydroxy-5-oxo-cyclopentyl]-octanoate	C17H26O5	156459	186728	154629	134024	177965	131500	195479	196752	61347.9	62386.3	91735.6	34273.4	28938	94554.4	178946	40601.4	0.369992	-1.43444	0.00703739
Dicyclohexyl disulfide	C12H22S2	40945.4	30460.5	28524.9	42542.6	48627	31816.7	52591.8	61616.7	21204	22848.6	18018.1	17684.7	18947	22658.8	21099.5	14527	0.479668	-1.05989	0.00821196
Hydroxyvalerylcarnitine	C12H25NO5	69365.6	114040	60852.2	74430.6	75098.8	58704.4	75627.8	58487.1	26577.7	20975.9	31771	24873.6	33394.5	26542.5	25679.8	24794.8	0.363169	-1.46129	0.00188616
O-glutaroyl-L-carnitine	C12H21NO6	50178.2	58866.3	53596.9	76302.9	61046.4	60727.8	85765.6	60084.7	12392.7	13912.8	23347	19198.5	15139.6	15568.8	7956.42	22010.1	0.254182	-1.97607	3.55087e-05
Glutarylcarnitine	C12H21NO6	50178.2	58866.3	53596.9	76302.9	61046.4	60727.8	85765.6	60084.7	12392.7	13912.8	23347	19198.5	15139.6	15568.8	7956.42	22010.1	0.254182	-1.97607	3.55087e-05
2-Hexenoylcarnitine	C13H23NO4	83816.4	188396	89131.7	81890.4	126074	163846	91390	83020.5	26293.3	36771.1	30486.5	33098.9	29207.5	48348.8	21077	21804.8	0.330675	-1.59651	0.00719988
12-Oxo-2,3-dinor-10,15-phytodienoic acid	C16H24O3	71203.9	50410.1	55515.8	76938.7	93951.9	65290.4	85085.3	81277.2	41992.2	0	42810.9	34616.9	32613.4	33013.6	0	30682	0.442999	-1.17462	0.00108897
3,5-Bis(1,1-dimethylethyl)-4-hydroxy-benzoic acid ethyl ester	C16H24O3	71203.9	50410.1	55515.8	76938.7	93951.9	65290.4	85085.3	81277.2	41992.2	0	42810.9	34616.9	32613.4	33013.6	0	30682	0.442999	-1.17462	0.00108897
Dehydrojuvabione	C16H24O3	71203.9	50410.1	55515.8	76938.7	93951.9	65290.4	85085.3	81277.2	41992.2	0	42810.9	34616.9	32613.4	33013.6	0	30682	0.442999	-1.17462	0.00108897
5-Hydroxy-1-(4-hydroxyphenyl)-3-decanone	C16H24O3	71203.9	50410.1	55515.8	76938.7	93951.9	65290.4	85085.3	81277.2	41992.2	0	42810.9	34616.9	32613.4	33013.6	0	30682	0.442999	-1.17462	0.00108897
2-(1-Propenyl)-delta1-piperideine	C8H13N	57065.3	44891.5	42515.2	48082.2	35254.4	41188.3	63662.9	73547.6	29599.3	18404.1	0	23884.2	21642.8	18894.8	25662.7	19235.1	0.439672	-1.1855	0.00166643
Hydroxyhexanoycarnitine	C13H25NO5	47414.2	41500.8	31862	33606.2	51327.5	46620	67783.9	60625.1	17503.5	43705.8	33796.4	16952	27915.7	17208.4	22142.7	20892.4	0.457654	-1.12767	0.0120041
Serratamic acid	C13H25NO5	47414.2	41500.8	31862	33606.2	51327.5	46620	67783.9	60625.1	17503.5	43705.8	33796.4	16952	27915.7	17208.4	22142.7	20892.4	0.457654	-1.12767	0.0120041
2-decylenic acid	C10H18O2	382065	482415	408085	507728	526754	430094	599832	514565	235044	159845	215312	154477	157457	140525	163489	210008	0.326552	-1.61461	1.78414e-05
3-Methyl-2,4-nonanedione	C10H18O2	382065	482415	408085	507728	526754	430094	599832	514565	235044	159845	215312	154477	157457	140525	163489	210008	0.326552	-1.61461	1.78414e-05
Cyclohexyl butanoate	C10H18O2	382065	482415	408085	507728	526754	430094	599832	514565	235044	159845	215312	154477	157457	140525	163489	210008	0.326552	-1.61461	1.78414e-05
(E)-2-Hexenyl butyrate	C10H18O2	382065	482415	408085	507728	526754	430094	599832	514565	235044	159845	215312	154477	157457	140525	163489	210008	0.326552	-1.61461	1.78414e-05
9-Hydroxygeraniol	C10H18O2	382065	482415	408085	507728	526754	430094	599832	514565	235044	159845	215312	154477	157457	140525	163489	210008	0.326552	-1.61461	1.78414e-05
4Z-decenoic acid	C10H18O2	382065	482415	408085	507728	526754	430094	599832	514565	235044	159845	215312	154477	157457	140525	163489	210008	0.326552	-1.61461	1.78414e-05
9-Decenoic acid	C10H18O2	382065	482415	408085	507728	526754	430094	599832	514565	235044	159845	215312	154477	157457	140525	163489	210008	0.326552	-1.61461	1.78414e-05
3Z-decenoic acid	C10H18O2	382065	482415	408085	507728	526754	430094	599832	514565	235044	159845	215312	154477	157457	140525	163489	210008	0.326552	-1.61461	1.78414e-05
6-endo-hydroxycineole	C10H18O2	382065	482415	408085	507728	526754	430094	599832	514565	235044	159845	215312	154477	157457	140525	163489	210008	0.326552	-1.61461	1.78414e-05
Linalyl oxide	C10H18O2	382065	482415	408085	507728	526754	430094	599832	514565	235044	159845	215312	154477	157457	140525	163489	210008	0.326552	-1.61461	1.78414e-05
(E)-3-(Tetrahydro-5,5-dimethyl-2-furanyl)-2-buten-1-ol	C10H18O2	382065	482415	408085	507728	526754	430094	599832	514565	235044	159845	215312	154477	157457	140525	163489	210008	0.326552	-1.61461	1.78414e-05
Citronellic acid	C10H18O2	382065	482415	408085	507728	526754	430094	599832	514565	235044	159845	215312	154477	157457	140525	163489	210008	0.326552	-1.61461	1.78414e-05
2-exo-Hydroxy-1,8-cineole	C10H18O2	382065	482415	408085	507728	526754	430094	599832	514565	235044	159845	215312	154477	157457	140525	163489	210008	0.326552	-1.61461	1.78414e-05
(S,E)-2,6-Dimethyl-5,7-octadiene-2,3-diol	C10H18O2	382065	482415	408085	507728	526754	430094	599832	514565	235044	159845	215312	154477	157457	140525	163489	210008	0.326552	-1.61461	1.78414e-05
Cnidiol C	C10H18O2	382065	482415	408085	507728	526754	430094	599832	514565	235044	159845	215312	154477	157457	140525	163489	210008	0.326552	-1.61461	1.78414e-05
Isopentyl 3-methyl-2-butenoate	C10H18O2	382065	482415	408085	507728	526754	430094	599832	514565	235044	159845	215312	154477	157457	140525	163489	210008	0.326552	-1.61461	1.78414e-05
5-Decenoic acid	C10H18O2	382065	482415	408085	507728	526754	430094	599832	514565	235044	159845	215312	154477	157457	140525	163489	210008	0.326552	-1.61461	1.78414e-05
(±)-cis-Linalyl oxide	C10H18O2	382065	482415	408085	507728	526754	430094	599832	514565	235044	159845	215312	154477	157457	140525	163489	210008	0.326552	-1.61461	1.78414e-05
(±)-trans-Linalyl oxide	C10H18O2	382065	482415	408085	507728	526754	430094	599832	514565	235044	159845	215312	154477	157457	140525	163489	210008	0.326552	-1.61461	1.78414e-05
Ethyl 4Z-octenoate	C10H18O2	382065	482415	408085	507728	526754	430094	599832	514565	235044	159845	215312	154477	157457	140525	163489	210008	0.326552	-1.61461	1.78414e-05
(+)-6-Hydroxy-2,6-dimethyl-7-octen-4-one	C10H18O2	382065	482415	408085	507728	526754	430094	599832	514565	235044	159845	215312	154477	157457	140525	163489	210008	0.326552	-1.61461	1.78414e-05
Methyl (xi)-3-nonenoate	C10H18O2	382065	482415	408085	507728	526754	430094	599832	514565	235044	159845	215312	154477	157457	140525	163489	210008	0.326552	-1.61461	1.78414e-05
3Z-Hexenyl isobutyrate	C10H18O2	382065	482415	408085	507728	526754	430094	599832	514565	235044	159845	215312	154477	157457	140525	163489	210008	0.326552	-1.61461	1.78414e-05
2-Propenyl heptanoate	C10H18O2	382065	482415	408085	507728	526754	430094	599832	514565	235044	159845	215312	154477	157457	140525	163489	210008	0.326552	-1.61461	1.78414e-05
Methyl 2-nonenoate	C10H18O2	382065	482415	408085	507728	526754	430094	599832	514565	235044	159845	215312	154477	157457	140525	163489	210008	0.326552	-1.61461	1.78414e-05
Menthone lactone	C10H18O2	382065	482415	408085	507728	526754	430094	599832	514565	235044	159845	215312	154477	157457	140525	163489	210008	0.326552	-1.61461	1.78414e-05
5Z-Octenyl acetate	C10H18O2	382065	482415	408085	507728	526754	430094	599832	514565	235044	159845	215312	154477	157457	140525	163489	210008	0.326552	-1.61461	1.78414e-05
(±)-6-Methyl-5-hepten-2-yl acetate	C10H18O2	382065	482415	408085	507728	526754	430094	599832	514565	235044	159845	215312	154477	157457	140525	163489	210008	0.326552	-1.61461	1.78414e-05
4-Hydroxy-2,6-dimethyl-7-octen-3-one	C10H18O2	382065	482415	408085	507728	526754	430094	599832	514565	235044	159845	215312	154477	157457	140525	163489	210008	0.326552	-1.61461	1.78414e-05
ethyl 3E-octenoate	C10H18O2	382065	482415	408085	507728	526754	430094	599832	514565	235044	159845	215312	154477	157457	140525	163489	210008	0.326552	-1.61461	1.78414e-05
2-Methylbutyl 3-methyl-2-butenoate	C10H18O2	382065	482415	408085	507728	526754	430094	599832	514565	235044	159845	215312	154477	157457	140525	163489	210008	0.326552	-1.61461	1.78414e-05
2,6-Dimethyl-3,7-octadiene-2,6-diol	C10H18O2	382065	482415	408085	507728	526754	430094	599832	514565	235044	159845	215312	154477	157457	140525	163489	210008	0.326552	-1.61461	1.78414e-05
1-Cyclopropyl-4-methyl-1,3-cyclohexanediol	C10H18O2	382065	482415	408085	507728	526754	430094	599832	514565	235044	159845	215312	154477	157457	140525	163489	210008	0.326552	-1.61461	1.78414e-05
Lilac alcohol	C10H18O2	382065	482415	408085	507728	526754	430094	599832	514565	235044	159845	215312	154477	157457	140525	163489	210008	0.326552	-1.61461	1.78414e-05
8-Methylnonenoate	C10H18O2	382065	482415	408085	507728	526754	430094	599832	514565	235044	159845	215312	154477	157457	140525	163489	210008	0.326552	-1.61461	1.78414e-05
Hexyl crotonate	C10H18O2	382065	482415	408085	507728	526754	430094	599832	514565	235044	159845	215312	154477	157457	140525	163489	210008	0.326552	-1.61461	1.78414e-05
Linalool oxide III	C10H18O2	382065	482415	408085	507728	526754	430094	599832	514565	235044	159845	215312	154477	157457	140525	163489	210008	0.326552	-1.61461	1.78414e-05
6-Decenoic acid	C10H18O2	382065	482415	408085	507728	526754	430094	599832	514565	235044	159845	215312	154477	157457	140525	163489	210008	0.326552	-1.61461	1.78414e-05
2-Octenyl acetate	C10H18O2	382065	482415	408085	507728	526754	430094	599832	514565	235044	159845	215312	154477	157457	140525	163489	210008	0.326552	-1.61461	1.78414e-05
Cyclohexylethyl acetate	C10H18O2	382065	482415	408085	507728	526754	430094	599832	514565	235044	159845	215312	154477	157457	140525	163489	210008	0.326552	-1.61461	1.78414e-05
Linalool oxide (trans-pyranoid)	C10H18O2	382065	482415	408085	507728	526754	430094	599832	514565	235044	159845	215312	154477	157457	140525	163489	210008	0.326552	-1.61461	1.78414e-05
3Z-Hexenyl butyrate	C10H18O2	382065	482415	408085	507728	526754	430094	599832	514565	235044	159845	215312	154477	157457	140525	163489	210008	0.326552	-1.61461	1.78414e-05
6-Decanolide	C10H18O2	382065	482415	408085	507728	526754	430094	599832	514565	235044	159845	215312	154477	157457	140525	163489	210008	0.326552	-1.61461	1.78414e-05
Ethyl (E)-2-octenoate	C10H18O2	382065	482415	408085	507728	526754	430094	599832	514565	235044	159845	215312	154477	157457	140525	163489	210008	0.326552	-1.61461	1.78414e-05
xi-Tetrahydro-3-pentyl-2H-pyran-2-one	C10H18O2	382065	482415	408085	507728	526754	430094	599832	514565	235044	159845	215312	154477	157457	140525	163489	210008	0.326552	-1.61461	1.78414e-05
trans-p-Menth-2-ene-1,4-diol	C10H18O2	382065	482415	408085	507728	526754	430094	599832	514565	235044	159845	215312	154477	157457	140525	163489	210008	0.326552	-1.61461	1.78414e-05
Delta-decalactone	C10H18O2	382065	482415	408085	507728	526754	430094	599832	514565	235044	159845	215312	154477	157457	140525	163489	210008	0.326552	-1.61461	1.78414e-05
xi-5-Hexyldihydro-2(3H)-furanone	C10H18O2	382065	482415	408085	507728	526754	430094	599832	514565	235044	159845	215312	154477	157457	140525	163489	210008	0.326552	-1.61461	1.78414e-05
1-Octen-3-yl acetate	C10H18O2	382065	482415	408085	507728	526754	430094	599832	514565	235044	159845	215312	154477	157457	140525	163489	210008	0.326552	-1.61461	1.78414e-05
p-Menth-8-ene-1,2-diol	C10H18O2	382065	482415	408085	507728	526754	430094	599832	514565	235044	159845	215312	154477	157457	140525	163489	210008	0.326552	-1.61461	1.78414e-05
(4R,7S)-7-isopropyl-4-methyloxepan-2-one	C10H18O2	382065	482415	408085	507728	526754	430094	599832	514565	235044	159845	215312	154477	157457	140525	163489	210008	0.326552	-1.61461	1.78414e-05
(1R,2R,4S)-Limonene-1,2-diol	C10H18O2	382065	482415	408085	507728	526754	430094	599832	514565	235044	159845	215312	154477	157457	140525	163489	210008	0.326552	-1.61461	1.78414e-05
Limonene-1,2-diol	C10H18O2	382065	482415	408085	507728	526754	430094	599832	514565	235044	159845	215312	154477	157457	140525	163489	210008	0.326552	-1.61461	1.78414e-05
(+)-Neomatatabiol	C10H18O2	382065	482415	408085	507728	526754	430094	599832	514565	235044	159845	215312	154477	157457	140525	163489	210008	0.326552	-1.61461	1.78414e-05
6-endo-Hydroxycineole	C10H18O2	382065	482415	408085	507728	526754	430094	599832	514565	235044	159845	215312	154477	157457	140525	163489	210008	0.326552	-1.61461	1.78414e-05
2,6-dimethyl-2E,7-octadiene-1,6-diol	C10H18O2	382065	482415	408085	507728	526754	430094	599832	514565	235044	159845	215312	154477	157457	140525	163489	210008	0.326552	-1.61461	1.78414e-05
(6E)-8-Hydroxygeraniol	C10H18O2	382065	482415	408085	507728	526754	430094	599832	514565	235044	159845	215312	154477	157457	140525	163489	210008	0.326552	-1.61461	1.78414e-05
2E-Octenyl acetate	C10H18O2	382065	482415	408085	507728	526754	430094	599832	514565	235044	159845	215312	154477	157457	140525	163489	210008	0.326552	-1.61461	1.78414e-05
3Z-Octenyl acetate	C10H18O2	382065	482415	408085	507728	526754	430094	599832	514565	235044	159845	215312	154477	157457	140525	163489	210008	0.326552	-1.61461	1.78414e-05
formyl 6E-nonenoate	C10H18O2	382065	482415	408085	507728	526754	430094	599832	514565	235044	159845	215312	154477	157457	140525	163489	210008	0.326552	-1.61461	1.78414e-05
ethyl 4Z-octenoate	C10H18O2	382065	482415	408085	507728	526754	430094	599832	514565	235044	159845	215312	154477	157457	140525	163489	210008	0.326552	-1.61461	1.78414e-05
1,7-Dioxaspiro[5.6]dodecane	C10H18O2	382065	482415	408085	507728	526754	430094	599832	514565	235044	159845	215312	154477	157457	140525	163489	210008	0.326552	-1.61461	1.78414e-05
2-Methyl-1,7-dioxaspiro[5.5]undecane	C10H18O2	382065	482415	408085	507728	526754	430094	599832	514565	235044	159845	215312	154477	157457	140525	163489	210008	0.326552	-1.61461	1.78414e-05
(4R,7R)-7-isopropyl-4-methyloxepan-2-one	C10H18O2	382065	482415	408085	507728	526754	430094	599832	514565	235044	159845	215312	154477	157457	140525	163489	210008	0.326552	-1.61461	1.78414e-05
10-Methyloxecan-2-one	C10H18O2	382065	482415	408085	507728	526754	430094	599832	514565	235044	159845	215312	154477	157457	140525	163489	210008	0.326552	-1.61461	1.78414e-05
(R)-gamma-Decalactone	C10H18O2	382065	482415	408085	507728	526754	430094	599832	514565	235044	159845	215312	154477	157457	140525	163489	210008	0.326552	-1.61461	1.78414e-05
2,3-Decanedione	C10H18O2	382065	482415	408085	507728	526754	430094	599832	514565	235044	159845	215312	154477	157457	140525	163489	210008	0.326552	-1.61461	1.78414e-05
cis-dec-2-enoic acid	C10H18O2	382065	482415	408085	507728	526754	430094	599832	514565	235044	159845	215312	154477	157457	140525	163489	210008	0.326552	-1.61461	1.78414e-05
Isodecenoic acid	C10H18O2	382065	482415	408085	507728	526754	430094	599832	514565	235044	159845	215312	154477	157457	140525	163489	210008	0.326552	-1.61461	1.78414e-05
Obtusilic acid	C10H18O2	382065	482415	408085	507728	526754	430094	599832	514565	235044	159845	215312	154477	157457	140525	163489	210008	0.326552	-1.61461	1.78414e-05
3-decylenic acid	C10H18O2	382065	482415	408085	507728	526754	430094	599832	514565	235044	159845	215312	154477	157457	140525	163489	210008	0.326552	-1.61461	1.78414e-05
3,7-dimethyl-2-octenoic acid	C10H18O2	382065	482415	408085	507728	526754	430094	599832	514565	235044	159845	215312	154477	157457	140525	163489	210008	0.326552	-1.61461	1.78414e-05
2,7-dimethyl-6-octenoic acid	C10H18O2	382065	482415	408085	507728	526754	430094	599832	514565	235044	159845	215312	154477	157457	140525	163489	210008	0.326552	-1.61461	1.78414e-05
3-methyl-2-nonenoic acid	C10H18O2	382065	482415	408085	507728	526754	430094	599832	514565	235044	159845	215312	154477	157457	140525	163489	210008	0.326552	-1.61461	1.78414e-05
D(-)-beta-hydroxy butyric acid	C4H8O3	878981	903594	781750	621242	854302	995793	1.23106e+06	1.38992e+06	25763.9	60376.4	151612	194541	75223.6	155285	143440	64453.4	0.122667	-3.02718	0.0299118
4-Methylnonanoic acid	C10H20O2	9378611	12510601	10533930	10980307	12879971	9452784	13969028	11505806	4632837	2973397	5217457	7917475	4.77805e+06	3887297	4.47318e+06	3.94352e+06	0.404962	-1.30414	1.78414e-05
Propyl heptanoate	C10H20O2	9378611	12510601	10533930	10980307	12879971	9452784	13969028	11505806	4632837	2973397	5217457	7917475	4.77805e+06	3887297	4.47318e+06	3.94352e+06	0.404962	-1.30414	1.78414e-05
Capric acid	C10H20O2	9378611	12510601	10533930	10980307	12879971	9452784	13969028	11505806	4632837	2973397	5217457	7917475	4.77805e+06	3887297	4.47318e+06	3.94352e+06	0.404962	-1.30414	1.78414e-05
Octyl acetate	C10H20O2	9378611	12510601	10533930	10980307	12879971	9452784	13969028	11505806	4632837	2973397	5217457	7917475	4.77805e+06	3887297	4.47318e+06	3.94352e+06	0.404962	-1.30414	1.78414e-05
(Z)-1-(1-Ethoxyethoxy)-3-hexene	C10H20O2	9378611	12510601	10533930	10980307	12879971	9452784	13969028	11505806	4632837	2973397	5217457	7917475	4.77805e+06	3887297	4.47318e+06	3.94352e+06	0.404962	-1.30414	1.78414e-05
2-Methylbutyl 3-methylbutanoate	C10H20O2	9378611	12510601	10533930	10980307	12879971	9452784	13969028	11505806	4632837	2973397	5217457	7917475	4.77805e+06	3887297	4.47318e+06	3.94352e+06	0.404962	-1.30414	1.78414e-05
trans-p-Menthane-1,8-diol	C10H20O2	9378611	12510601	10533930	10980307	12879971	9452784	13969028	11505806	4632837	2973397	5217457	7917475	4.77805e+06	3887297	4.47318e+06	3.94352e+06	0.404962	-1.30414	1.78414e-05
(1R,2S,3S,4R)-p-Menthane-2,3-diol	C10H20O2	9378611	12510601	10533930	10980307	12879971	9452784	13969028	11505806	4632837	2973397	5217457	7917475	4.77805e+06	3887297	4.47318e+06	3.94352e+06	0.404962	-1.30414	1.78414e-05
3-Methylbutyl pentanoate	C10H20O2	9378611	12510601	10533930	10980307	12879971	9452784	13969028	11505806	4632837	2973397	5217457	7917475	4.77805e+06	3887297	4.47318e+06	3.94352e+06	0.404962	-1.30414	1.78414e-05
1,1-Diethoxy-2-hexene	C10H20O2	9378611	12510601	10533930	10980307	12879971	9452784	13969028	11505806	4632837	2973397	5217457	7917475	4.77805e+06	3887297	4.47318e+06	3.94352e+06	0.404962	-1.30414	1.78414e-05
butyl hexanoate	C10H20O2	9378611	12510601	10533930	10980307	12879971	9452784	13969028	11505806	4632837	2973397	5217457	7917475	4.77805e+06	3887297	4.47318e+06	3.94352e+06	0.404962	-1.30414	1.78414e-05
2-Methylbutyl 2-methylbutanoate	C10H20O2	9378611	12510601	10533930	10980307	12879971	9452784	13969028	11505806	4632837	2973397	5217457	7917475	4.77805e+06	3887297	4.47318e+06	3.94352e+06	0.404962	-1.30414	1.78414e-05
Ethyl octanoate	C10H20O2	9378611	12510601	10533930	10980307	12879971	9452784	13969028	11505806	4632837	2973397	5217457	7917475	4.77805e+06	3887297	4.47318e+06	3.94352e+06	0.404962	-1.30414	1.78414e-05
3-Methylbutyl 2-methylbutanoate	C10H20O2	9378611	12510601	10533930	10980307	12879971	9452784	13969028	11505806	4632837	2973397	5217457	7917475	4.77805e+06	3887297	4.47318e+06	3.94352e+06	0.404962	-1.30414	1.78414e-05
(±)-3-Octyl acetate	C10H20O2	9378611	12510601	10533930	10980307	12879971	9452784	13969028	11505806	4632837	2973397	5217457	7917475	4.77805e+06	3887297	4.47318e+06	3.94352e+06	0.404962	-1.30414	1.78414e-05
Isoamyl isovalerate	C10H20O2	9378611	12510601	10533930	10980307	12879971	9452784	13969028	11505806	4632837	2973397	5217457	7917475	4.77805e+06	3887297	4.47318e+06	3.94352e+06	0.404962	-1.30414	1.78414e-05
Pentyl 3-methylbutanoate	C10H20O2	9378611	12510601	10533930	10980307	12879971	9452784	13969028	11505806	4632837	2973397	5217457	7917475	4.77805e+06	3887297	4.47318e+06	3.94352e+06	0.404962	-1.30414	1.78414e-05
Isooctyl acetate	C10H20O2	9378611	12510601	10533930	10980307	12879971	9452784	13969028	11505806	4632837	2973397	5217457	7917475	4.77805e+06	3887297	4.47318e+06	3.94352e+06	0.404962	-1.30414	1.78414e-05
Acetaldehyde 1,3-octanediol acetal	C10H20O2	9378611	12510601	10533930	10980307	12879971	9452784	13969028	11505806	4632837	2973397	5217457	7917475	4.77805e+06	3887297	4.47318e+06	3.94352e+06	0.404962	-1.30414	1.78414e-05
Ethyl 2-ethylhexanoate	C10H20O2	9378611	12510601	10533930	10980307	12879971	9452784	13969028	11505806	4632837	2973397	5217457	7917475	4.77805e+06	3887297	4.47318e+06	3.94352e+06	0.404962	-1.30414	1.78414e-05
Hexanal butane-2,3-diol acetal	C10H20O2	9378611	12510601	10533930	10980307	12879971	9452784	13969028	11505806	4632837	2973397	5217457	7917475	4.77805e+06	3887297	4.47318e+06	3.94352e+06	0.404962	-1.30414	1.78414e-05
Heptanal propyleneglycol acetal	C10H20O2	9378611	12510601	10533930	10980307	12879971	9452784	13969028	11505806	4632837	2973397	5217457	7917475	4.77805e+06	3887297	4.47318e+06	3.94352e+06	0.404962	-1.30414	1.78414e-05
(2S)-2-Ethylhexyl acetate	C10H20O2	9378611	12510601	10533930	10980307	12879971	9452784	13969028	11505806	4632837	2973397	5217457	7917475	4.77805e+06	3887297	4.47318e+06	3.94352e+06	0.404962	-1.30414	1.78414e-05
4-Ethyloctanoic acid	C10H20O2	9378611	12510601	10533930	10980307	12879971	9452784	13969028	11505806	4632837	2973397	5217457	7917475	4.77805e+06	3887297	4.47318e+06	3.94352e+06	0.404962	-1.30414	1.78414e-05
p-Menthane-3,8-diol	C10H20O2	9378611	12510601	10533930	10980307	12879971	9452784	13969028	11505806	4632837	2973397	5217457	7917475	4.77805e+06	3887297	4.47318e+06	3.94352e+06	0.404962	-1.30414	1.78414e-05
2-Methylpropyl hexanoate	C10H20O2	9378611	12510601	10533930	10980307	12879971	9452784	13969028	11505806	4632837	2973397	5217457	7917475	4.77805e+06	3887297	4.47318e+06	3.94352e+06	0.404962	-1.30414	1.78414e-05
7-Hydroxy-3,7-dimethyloctanal	C10H20O2	9378611	12510601	10533930	10980307	12879971	9452784	13969028	11505806	4632837	2973397	5217457	7917475	4.77805e+06	3887297	4.47318e+06	3.94352e+06	0.404962	-1.30414	1.78414e-05
2,6-Dimethyl-7-octene-2,6-diol	C10H20O2	9378611	12510601	10533930	10980307	12879971	9452784	13969028	11505806	4632837	2973397	5217457	7917475	4.77805e+06	3887297	4.47318e+06	3.94352e+06	0.404962	-1.30414	1.78414e-05
Methyl nonanoate	C10H20O2	9378611	12510601	10533930	10980307	12879971	9452784	13969028	11505806	4632837	2973397	5217457	7917475	4.77805e+06	3887297	4.47318e+06	3.94352e+06	0.404962	-1.30414	1.78414e-05
hexyl butyrate	C10H20O2	9378611	12510601	10533930	10980307	12879971	9452784	13969028	11505806	4632837	2973397	5217457	7917475	4.77805e+06	3887297	4.47318e+06	3.94352e+06	0.404962	-1.30414	1.78414e-05
Hexyl 2-methylpropanoate	C10H20O2	9378611	12510601	10533930	10980307	12879971	9452784	13969028	11505806	4632837	2973397	5217457	7917475	4.77805e+06	3887297	4.47318e+06	3.94352e+06	0.404962	-1.30414	1.78414e-05
(1S,3R,4R)-p-Menthane-1,3-diol	C10H20O2	9378611	12510601	10533930	10980307	12879971	9452784	13969028	11505806	4632837	2973397	5217457	7917475	4.77805e+06	3887297	4.47318e+06	3.94352e+06	0.404962	-1.30414	1.78414e-05
1beta,3beta,4alpha-p-menthane-3,8-diol	C10H20O2	9378611	12510601	10533930	10980307	12879971	9452784	13969028	11505806	4632837	2973397	5217457	7917475	4.77805e+06	3887297	4.47318e+06	3.94352e+06	0.404962	-1.30414	1.78414e-05
2-methyl nonaoic acid	C10H20O2	9378611	12510601	10533930	10980307	12879971	9452784	13969028	11505806	4632837	2973397	5217457	7917475	4.77805e+06	3887297	4.47318e+06	3.94352e+06	0.404962	-1.30414	1.78414e-05
2-Pentyl 3-methylbutanoate	C10H20O2	9378611	12510601	10533930	10980307	12879971	9452784	13969028	11505806	4632837	2973397	5217457	7917475	4.77805e+06	3887297	4.47318e+06	3.94352e+06	0.404962	-1.30414	1.78414e-05
formyl 4-methyl-octanoate	C10H20O2	9378611	12510601	10533930	10980307	12879971	9452784	13969028	11505806	4632837	2973397	5217457	7917475	4.77805e+06	3887297	4.47318e+06	3.94352e+06	0.404962	-1.30414	1.78414e-05
ethyl 4-methyl-heptanoate	C10H20O2	9378611	12510601	10533930	10980307	12879971	9452784	13969028	11505806	4632837	2973397	5217457	7917475	4.77805e+06	3887297	4.47318e+06	3.94352e+06	0.404962	-1.30414	1.78414e-05
1beta,3beta,4beta-p-menthane-3,8-diol	C10H20O2	9378611	12510601	10533930	10980307	12879971	9452784	13969028	11505806	4632837	2973397	5217457	7917475	4.77805e+06	3887297	4.47318e+06	3.94352e+06	0.404962	-1.30414	1.78414e-05
1beta,3alpha,4beta-p-menthane-3,8-diol	C10H20O2	9378611	12510601	10533930	10980307	12879971	9452784	13969028	11505806	4632837	2973397	5217457	7917475	4.77805e+06	3887297	4.47318e+06	3.94352e+06	0.404962	-1.30414	1.78414e-05
1alpha,3beta,4beta-p-menthane-3,8-diol	C10H20O2	9378611	12510601	10533930	10980307	12879971	9452784	13969028	11505806	4632837	2973397	5217457	7917475	4.77805e+06	3887297	4.47318e+06	3.94352e+06	0.404962	-1.30414	1.78414e-05
1beta,3alpha,4alpha-p-menthane-3,8-diol	C10H20O2	9378611	12510601	10533930	10980307	12879971	9452784	13969028	11505806	4632837	2973397	5217457	7917475	4.77805e+06	3887297	4.47318e+06	3.94352e+06	0.404962	-1.30414	1.78414e-05
1alpha,3alpha,4beta-p-menthane-3,8-diol	C10H20O2	9378611	12510601	10533930	10980307	12879971	9452784	13969028	11505806	4632837	2973397	5217457	7917475	4.77805e+06	3887297	4.47318e+06	3.94352e+06	0.404962	-1.30414	1.78414e-05
2-Hydroxydecan-3-one	C10H20O2	9378611	12510601	10533930	10980307	12879971	9452784	13969028	11505806	4632837	2973397	5217457	7917475	4.77805e+06	3887297	4.47318e+06	3.94352e+06	0.404962	-1.30414	1.78414e-05
3-Hydroxydecan-2-one	C10H20O2	9378611	12510601	10533930	10980307	12879971	9452784	13969028	11505806	4632837	2973397	5217457	7917475	4.77805e+06	3887297	4.47318e+06	3.94352e+06	0.404962	-1.30414	1.78414e-05
2S-Hydroxydecan-3-one	C10H20O2	9378611	12510601	10533930	10980307	12879971	9452784	13969028	11505806	4632837	2973397	5217457	7917475	4.77805e+06	3887297	4.47318e+06	3.94352e+06	0.404962	-1.30414	1.78414e-05
3-methyl-nonanoic acid	C10H20O2	9378611	12510601	10533930	10980307	12879971	9452784	13969028	11505806	4632837	2973397	5217457	7917475	4.77805e+06	3887297	4.47318e+06	3.94352e+06	0.404962	-1.30414	1.78414e-05
8-methyl-nonanoic acid	C10H20O2	9378611	12510601	10533930	10980307	12879971	9452784	13969028	11505806	4632837	2973397	5217457	7917475	4.77805e+06	3887297	4.47318e+06	3.94352e+06	0.404962	-1.30414	1.78414e-05
7-methyl-nonanoic acid	C10H20O2	9378611	12510601	10533930	10980307	12879971	9452784	13969028	11505806	4632837	2973397	5217457	7917475	4.77805e+06	3887297	4.47318e+06	3.94352e+06	0.404962	-1.30414	1.78414e-05
Cyclohexyl 3-methylbutanoate	C11H20O2	259773	331045	247427	291458	327829	265874	391031	354682	96378.1	73922.6	87830.4	56723.8	71086.1	59802.6	71008.8	120114	0.234155	-2.09447	1.78414e-05
Cyclohexyl pentanoate	C11H20O2	259773	331045	247427	291458	327829	265874	391031	354682	96378.1	73922.6	87830.4	56723.8	71086.1	59802.6	71008.8	120114	0.234155	-2.09447	1.78414e-05
5-Octenyl propanoate	C11H20O2	259773	331045	247427	291458	327829	265874	391031	354682	96378.1	73922.6	87830.4	56723.8	71086.1	59802.6	71008.8	120114	0.234155	-2.09447	1.78414e-05
cis-3-Hexenyl 2-methylbutanoate	C11H20O2	259773	331045	247427	291458	327829	265874	391031	354682	96378.1	73922.6	87830.4	56723.8	71086.1	59802.6	71008.8	120114	0.234155	-2.09447	1.78414e-05
(Z)-3-Hexenyl 3-methylbutanoate	C11H20O2	259773	331045	247427	291458	327829	265874	391031	354682	96378.1	73922.6	87830.4	56723.8	71086.1	59802.6	71008.8	120114	0.234155	-2.09447	1.78414e-05
2-Hexenyl valerate	C11H20O2	259773	331045	247427	291458	327829	265874	391031	354682	96378.1	73922.6	87830.4	56723.8	71086.1	59802.6	71008.8	120114	0.234155	-2.09447	1.78414e-05
2-Hexenyl isovalerate	C11H20O2	259773	331045	247427	291458	327829	265874	391031	354682	96378.1	73922.6	87830.4	56723.8	71086.1	59802.6	71008.8	120114	0.234155	-2.09447	1.78414e-05
gamma-undecalactone	C11H20O2	259773	331045	247427	291458	327829	265874	391031	354682	96378.1	73922.6	87830.4	56723.8	71086.1	59802.6	71008.8	120114	0.234155	-2.09447	1.78414e-05
trans-2-Hexyl-1-cyclopropaneacetic acid	C11H20O2	259773	331045	247427	291458	327829	265874	391031	354682	96378.1	73922.6	87830.4	56723.8	71086.1	59802.6	71008.8	120114	0.234155	-2.09447	1.78414e-05
(Z)-3-Methyl-4-decenoic acid	C11H20O2	259773	331045	247427	291458	327829	265874	391031	354682	96378.1	73922.6	87830.4	56723.8	71086.1	59802.6	71008.8	120114	0.234155	-2.09447	1.78414e-05
(Z)-3-Methyl-3-decenoic acid	C11H20O2	259773	331045	247427	291458	327829	265874	391031	354682	96378.1	73922.6	87830.4	56723.8	71086.1	59802.6	71008.8	120114	0.234155	-2.09447	1.78414e-05
2-Propenyl octanoate	C11H20O2	259773	331045	247427	291458	327829	265874	391031	354682	96378.1	73922.6	87830.4	56723.8	71086.1	59802.6	71008.8	120114	0.234155	-2.09447	1.78414e-05
3-Hexenyl 2-methylbutyrate	C11H20O2	259773	331045	247427	291458	327829	265874	391031	354682	96378.1	73922.6	87830.4	56723.8	71086.1	59802.6	71008.8	120114	0.234155	-2.09447	1.78414e-05
(E)-3-Heptenyl 2-methylpropanoate	C11H20O2	259773	331045	247427	291458	327829	265874	391031	354682	96378.1	73922.6	87830.4	56723.8	71086.1	59802.6	71008.8	120114	0.234155	-2.09447	1.78414e-05
Methyl 2-decenoate	C11H20O2	259773	331045	247427	291458	327829	265874	391031	354682	96378.1	73922.6	87830.4	56723.8	71086.1	59802.6	71008.8	120114	0.234155	-2.09447	1.78414e-05
6-Hexyltetrahydro-2H-pyran-2-one	C11H20O2	259773	331045	247427	291458	327829	265874	391031	354682	96378.1	73922.6	87830.4	56723.8	71086.1	59802.6	71008.8	120114	0.234155	-2.09447	1.78414e-05
5-Hexyldihydro-5-methyl-2(3H)-furanone	C11H20O2	259773	331045	247427	291458	327829	265874	391031	354682	96378.1	73922.6	87830.4	56723.8	71086.1	59802.6	71008.8	120114	0.234155	-2.09447	1.78414e-05
cis-3-Hexenyl pentanoate	C11H20O2	259773	331045	247427	291458	327829	265874	391031	354682	96378.1	73922.6	87830.4	56723.8	71086.1	59802.6	71008.8	120114	0.234155	-2.09447	1.78414e-05
2,3-Undecanedione	C11H20O2	259773	331045	247427	291458	327829	265874	391031	354682	96378.1	73922.6	87830.4	56723.8	71086.1	59802.6	71008.8	120114	0.234155	-2.09447	1.78414e-05
Ethyl (E)-2-nonenoate	C11H20O2	259773	331045	247427	291458	327829	265874	391031	354682	96378.1	73922.6	87830.4	56723.8	71086.1	59802.6	71008.8	120114	0.234155	-2.09447	1.78414e-05
Ethyl 3-cyclohexylpropionate	C11H20O2	259773	331045	247427	291458	327829	265874	391031	354682	96378.1	73922.6	87830.4	56723.8	71086.1	59802.6	71008.8	120114	0.234155	-2.09447	1.78414e-05
Citronellyl formate	C11H20O2	259773	331045	247427	291458	327829	265874	391031	354682	96378.1	73922.6	87830.4	56723.8	71086.1	59802.6	71008.8	120114	0.234155	-2.09447	1.78414e-05
10-hendecenoic acid	C11H20O2	259773	331045	247427	291458	327829	265874	391031	354682	96378.1	73922.6	87830.4	56723.8	71086.1	59802.6	71008.8	120114	0.234155	-2.09447	1.78414e-05
5-Hexyldihydro-4-methyl-2(3H)-furanone	C11H20O2	259773	331045	247427	291458	327829	265874	391031	354682	96378.1	73922.6	87830.4	56723.8	71086.1	59802.6	71008.8	120114	0.234155	-2.09447	1.78414e-05
(x)-1-Nonen-3-yl acetate	C11H20O2	259773	331045	247427	291458	327829	265874	391031	354682	96378.1	73922.6	87830.4	56723.8	71086.1	59802.6	71008.8	120114	0.234155	-2.09447	1.78414e-05
Rhodinyl formate	C11H20O2	259773	331045	247427	291458	327829	265874	391031	354682	96378.1	73922.6	87830.4	56723.8	71086.1	59802.6	71008.8	120114	0.234155	-2.09447	1.78414e-05
formyl 3,7-dimethyl-6E-octenoate	C11H20O2	259773	331045	247427	291458	327829	265874	391031	354682	96378.1	73922.6	87830.4	56723.8	71086.1	59802.6	71008.8	120114	0.234155	-2.09447	1.78414e-05
cis-3-Octenyl propionate	C11H20O2	259773	331045	247427	291458	327829	265874	391031	354682	96378.1	73922.6	87830.4	56723.8	71086.1	59802.6	71008.8	120114	0.234155	-2.09447	1.78414e-05
Pent-2-enyl hexanoate	C11H20O2	259773	331045	247427	291458	327829	265874	391031	354682	96378.1	73922.6	87830.4	56723.8	71086.1	59802.6	71008.8	120114	0.234155	-2.09447	1.78414e-05
6-Methyl-5-hepten-2-one propyleneglycol acetal	C11H20O2	259773	331045	247427	291458	327829	265874	391031	354682	96378.1	73922.6	87830.4	56723.8	71086.1	59802.6	71008.8	120114	0.234155	-2.09447	1.78414e-05
Prenyl caproate	C11H20O2	259773	331045	247427	291458	327829	265874	391031	354682	96378.1	73922.6	87830.4	56723.8	71086.1	59802.6	71008.8	120114	0.234155	-2.09447	1.78414e-05
trans-2-Hexenyl 2-methylbutyrate	C11H20O2	259773	331045	247427	291458	327829	265874	391031	354682	96378.1	73922.6	87830.4	56723.8	71086.1	59802.6	71008.8	120114	0.234155	-2.09447	1.78414e-05
2-Ethylhexyl acrylate	C11H20O2	259773	331045	247427	291458	327829	265874	391031	354682	96378.1	73922.6	87830.4	56723.8	71086.1	59802.6	71008.8	120114	0.234155	-2.09447	1.78414e-05
gamma-Undecalactone	C11H20O2	259773	331045	247427	291458	327829	265874	391031	354682	96378.1	73922.6	87830.4	56723.8	71086.1	59802.6	71008.8	120114	0.234155	-2.09447	1.78414e-05
11-undecanolactone	C11H20O2	259773	331045	247427	291458	327829	265874	391031	354682	96378.1	73922.6	87830.4	56723.8	71086.1	59802.6	71008.8	120114	0.234155	-2.09447	1.78414e-05
6E-Nonenyl acetate	C11H20O2	259773	331045	247427	291458	327829	265874	391031	354682	96378.1	73922.6	87830.4	56723.8	71086.1	59802.6	71008.8	120114	0.234155	-2.09447	1.78414e-05
2-Nonenyl acetate	C11H20O2	259773	331045	247427	291458	327829	265874	391031	354682	96378.1	73922.6	87830.4	56723.8	71086.1	59802.6	71008.8	120114	0.234155	-2.09447	1.78414e-05
formyl 4Z-decenoate	C11H20O2	259773	331045	247427	291458	327829	265874	391031	354682	96378.1	73922.6	87830.4	56723.8	71086.1	59802.6	71008.8	120114	0.234155	-2.09447	1.78414e-05
(2S,6R,8S)-2,8-Dimethyl-1,7-dioxaspiro[5.5]undecane	C11H20O2	259773	331045	247427	291458	327829	265874	391031	354682	96378.1	73922.6	87830.4	56723.8	71086.1	59802.6	71008.8	120114	0.234155	-2.09447	1.78414e-05
2-Ethyl-7-methyl-1,6-dioxaspiro[4.5]decane	C11H20O2	259773	331045	247427	291458	327829	265874	391031	354682	96378.1	73922.6	87830.4	56723.8	71086.1	59802.6	71008.8	120114	0.234155	-2.09447	1.78414e-05
2-Methyl-1,7-dioxaspiro[5.6]dodecane	C11H20O2	259773	331045	247427	291458	327829	265874	391031	354682	96378.1	73922.6	87830.4	56723.8	71086.1	59802.6	71008.8	120114	0.234155	-2.09447	1.78414e-05
2,7-Diethyl-1,6-dioxaspiro[4.4]nonane	C11H20O2	259773	331045	247427	291458	327829	265874	391031	354682	96378.1	73922.6	87830.4	56723.8	71086.1	59802.6	71008.8	120114	0.234155	-2.09447	1.78414e-05
7-Ethyl-2R-methyl-1,6-dioxaspiro[4.5]decane	C11H20O2	259773	331045	247427	291458	327829	265874	391031	354682	96378.1	73922.6	87830.4	56723.8	71086.1	59802.6	71008.8	120114	0.234155	-2.09447	1.78414e-05
2-Ethyl-1,7-dioxaspiro[5.5]undecane	C11H20O2	259773	331045	247427	291458	327829	265874	391031	354682	96378.1	73922.6	87830.4	56723.8	71086.1	59802.6	71008.8	120114	0.234155	-2.09447	1.78414e-05
2S-Ethyl-7-methyl-1,6-dioxaspiro[4.5]decane	C11H20O2	259773	331045	247427	291458	327829	265874	391031	354682	96378.1	73922.6	87830.4	56723.8	71086.1	59802.6	71008.8	120114	0.234155	-2.09447	1.78414e-05
(2S,6S,8S)-2,8-Dimethyl-1,7-dioxaspiro[5.5]undecane	C11H20O2	259773	331045	247427	291458	327829	265874	391031	354682	96378.1	73922.6	87830.4	56723.8	71086.1	59802.6	71008.8	120114	0.234155	-2.09447	1.78414e-05
2-Methyl-7-propyl-1,6-dioxaspiro[4.4]nonane	C11H20O2	259773	331045	247427	291458	327829	265874	391031	354682	96378.1	73922.6	87830.4	56723.8	71086.1	59802.6	71008.8	120114	0.234155	-2.09447	1.78414e-05
2,7-Dimethyl-1,6-dioxaspiro[4.6]undecane	C11H20O2	259773	331045	247427	291458	327829	265874	391031	354682	96378.1	73922.6	87830.4	56723.8	71086.1	59802.6	71008.8	120114	0.234155	-2.09447	1.78414e-05
7-undecenoic acid	C11H20O2	259773	331045	247427	291458	327829	265874	391031	354682	96378.1	73922.6	87830.4	56723.8	71086.1	59802.6	71008.8	120114	0.234155	-2.09447	1.78414e-05
6-undecenoic acid	C11H20O2	259773	331045	247427	291458	327829	265874	391031	354682	96378.1	73922.6	87830.4	56723.8	71086.1	59802.6	71008.8	120114	0.234155	-2.09447	1.78414e-05
4-undecenoic acid	C11H20O2	259773	331045	247427	291458	327829	265874	391031	354682	96378.1	73922.6	87830.4	56723.8	71086.1	59802.6	71008.8	120114	0.234155	-2.09447	1.78414e-05
5Z-undecenoic acid	C11H20O2	259773	331045	247427	291458	327829	265874	391031	354682	96378.1	73922.6	87830.4	56723.8	71086.1	59802.6	71008.8	120114	0.234155	-2.09447	1.78414e-05
5E-undecenoic acid	C11H20O2	259773	331045	247427	291458	327829	265874	391031	354682	96378.1	73922.6	87830.4	56723.8	71086.1	59802.6	71008.8	120114	0.234155	-2.09447	1.78414e-05
9-hendecenoic acid	C11H20O2	259773	331045	247427	291458	327829	265874	391031	354682	96378.1	73922.6	87830.4	56723.8	71086.1	59802.6	71008.8	120114	0.234155	-2.09447	1.78414e-05
2-hendecenoic acid	C11H20O2	259773	331045	247427	291458	327829	265874	391031	354682	96378.1	73922.6	87830.4	56723.8	71086.1	59802.6	71008.8	120114	0.234155	-2.09447	1.78414e-05
6Z-undecenoic acid	C11H20O2	259773	331045	247427	291458	327829	265874	391031	354682	96378.1	73922.6	87830.4	56723.8	71086.1	59802.6	71008.8	120114	0.234155	-2.09447	1.78414e-05
3E-undecenoic acid	C11H20O2	259773	331045	247427	291458	327829	265874	391031	354682	96378.1	73922.6	87830.4	56723.8	71086.1	59802.6	71008.8	120114	0.234155	-2.09447	1.78414e-05
2Z-undecenoic acid	C11H20O2	259773	331045	247427	291458	327829	265874	391031	354682	96378.1	73922.6	87830.4	56723.8	71086.1	59802.6	71008.8	120114	0.234155	-2.09447	1.78414e-05
9Z-undecenoic acid	C11H20O2	259773	331045	247427	291458	327829	265874	391031	354682	96378.1	73922.6	87830.4	56723.8	71086.1	59802.6	71008.8	120114	0.234155	-2.09447	1.78414e-05
8Z-undecenoic acid	C11H20O2	259773	331045	247427	291458	327829	265874	391031	354682	96378.1	73922.6	87830.4	56723.8	71086.1	59802.6	71008.8	120114	0.234155	-2.09447	1.78414e-05
2,7-dimethyl-6-nonenoic acid	C11H20O2	259773	331045	247427	291458	327829	265874	391031	354682	96378.1	73922.6	87830.4	56723.8	71086.1	59802.6	71008.8	120114	0.234155	-2.09447	1.78414e-05
4-ethyl-2-methyl-2-octenoic acid	C11H20O2	259773	331045	247427	291458	327829	265874	391031	354682	96378.1	73922.6	87830.4	56723.8	71086.1	59802.6	71008.8	120114	0.234155	-2.09447	1.78414e-05
Undecylic acid	C11H22O2	1521156	2.04302e+06	1609977	1.77459e+06	2.2223e+06	1.56491e+06	2.2154e+06	1.98399e+06	495373	252493	460341	826351	491013	344444	437246	413213	0.23881	-2.06606	1.43683e-05
Heptyl butyrate	C11H22O2	1521156	2.04302e+06	1609977	1.77459e+06	2.2223e+06	1.56491e+06	2.2154e+06	1.98399e+06	495373	252493	460341	826351	491013	344444	437246	413213	0.23881	-2.06606	1.43683e-05
9-methyl-decanoic acid	C11H22O2	1521156	2.04302e+06	1609977	1.77459e+06	2.2223e+06	1.56491e+06	2.2154e+06	1.98399e+06	495373	252493	460341	826351	491013	344444	437246	413213	0.23881	-2.06606	1.43683e-05
Isobutyl enanthate	C11H22O2	1521156	2.04302e+06	1609977	1.77459e+06	2.2223e+06	1.56491e+06	2.2154e+06	1.98399e+06	495373	252493	460341	826351	491013	344444	437246	413213	0.23881	-2.06606	1.43683e-05
Octyl propanoate	C11H22O2	1521156	2.04302e+06	1609977	1.77459e+06	2.2223e+06	1.56491e+06	2.2154e+06	1.98399e+06	495373	252493	460341	826351	491013	344444	437246	413213	0.23881	-2.06606	1.43683e-05
7,7-Diethoxy-3-heptene	C11H22O2	1521156	2.04302e+06	1609977	1.77459e+06	2.2223e+06	1.56491e+06	2.2154e+06	1.98399e+06	495373	252493	460341	826351	491013	344444	437246	413213	0.23881	-2.06606	1.43683e-05
8-methyl-decanoic acid	C11H22O2	1521156	2.04302e+06	1609977	1.77459e+06	2.2223e+06	1.56491e+06	2.2154e+06	1.98399e+06	495373	252493	460341	826351	491013	344444	437246	413213	0.23881	-2.06606	1.43683e-05
formyl decanoate	C11H22O2	1521156	2.04302e+06	1609977	1.77459e+06	2.2223e+06	1.56491e+06	2.2154e+06	1.98399e+06	495373	252493	460341	826351	491013	344444	437246	413213	0.23881	-2.06606	1.43683e-05
2-Methylbutyl hexanoate	C11H22O2	1521156	2.04302e+06	1609977	1.77459e+06	2.2223e+06	1.56491e+06	2.2154e+06	1.98399e+06	495373	252493	460341	826351	491013	344444	437246	413213	0.23881	-2.06606	1.43683e-05
Propyl octanoate	C11H22O2	1521156	2.04302e+06	1609977	1.77459e+06	2.2223e+06	1.56491e+06	2.2154e+06	1.98399e+06	495373	252493	460341	826351	491013	344444	437246	413213	0.23881	-2.06606	1.43683e-05
Hexyl 2-methylbutanoate	C11H22O2	1521156	2.04302e+06	1609977	1.77459e+06	2.2223e+06	1.56491e+06	2.2154e+06	1.98399e+06	495373	252493	460341	826351	491013	344444	437246	413213	0.23881	-2.06606	1.43683e-05
Ethyl nonanoate	C11H22O2	1521156	2.04302e+06	1609977	1.77459e+06	2.2223e+06	1.56491e+06	2.2154e+06	1.98399e+06	495373	252493	460341	826351	491013	344444	437246	413213	0.23881	-2.06606	1.43683e-05
Heptyl 2-methylpropanoate	C11H22O2	1521156	2.04302e+06	1609977	1.77459e+06	2.2223e+06	1.56491e+06	2.2154e+06	1.98399e+06	495373	252493	460341	826351	491013	344444	437246	413213	0.23881	-2.06606	1.43683e-05
Nonyl acetate	C11H22O2	1521156	2.04302e+06	1609977	1.77459e+06	2.2223e+06	1.56491e+06	2.2154e+06	1.98399e+06	495373	252493	460341	826351	491013	344444	437246	413213	0.23881	-2.06606	1.43683e-05
Hexyl 3-methylbutanoate	C11H22O2	1521156	2.04302e+06	1609977	1.77459e+06	2.2223e+06	1.56491e+06	2.2154e+06	1.98399e+06	495373	252493	460341	826351	491013	344444	437246	413213	0.23881	-2.06606	1.43683e-05
2-Hexyl-4,5-dimethyl-1,3-dioxolane	C11H22O2	1521156	2.04302e+06	1609977	1.77459e+06	2.2223e+06	1.56491e+06	2.2154e+06	1.98399e+06	495373	252493	460341	826351	491013	344444	437246	413213	0.23881	-2.06606	1.43683e-05
6,6-Dimethoxy-2,5,5-trimethyl-2-hexene	C11H22O2	1521156	2.04302e+06	1609977	1.77459e+06	2.2223e+06	1.56491e+06	2.2154e+06	1.98399e+06	495373	252493	460341	826351	491013	344444	437246	413213	0.23881	-2.06606	1.43683e-05
valeryl hexanoate	C11H22O2	1521156	2.04302e+06	1609977	1.77459e+06	2.2223e+06	1.56491e+06	2.2154e+06	1.98399e+06	495373	252493	460341	826351	491013	344444	437246	413213	0.23881	-2.06606	1.43683e-05
4,8-dimethyl-nonanoic acid	C11H22O2	1521156	2.04302e+06	1609977	1.77459e+06	2.2223e+06	1.56491e+06	2.2154e+06	1.98399e+06	495373	252493	460341	826351	491013	344444	437246	413213	0.23881	-2.06606	1.43683e-05
Butyl heptanoate	C11H22O2	1521156	2.04302e+06	1609977	1.77459e+06	2.2223e+06	1.56491e+06	2.2154e+06	1.98399e+06	495373	252493	460341	826351	491013	344444	437246	413213	0.23881	-2.06606	1.43683e-05
3-Methylbutyl hexanoate	C11H22O2	1521156	2.04302e+06	1609977	1.77459e+06	2.2223e+06	1.56491e+06	2.2154e+06	1.98399e+06	495373	252493	460341	826351	491013	344444	437246	413213	0.23881	-2.06606	1.43683e-05
Octanal propyleneglycol acetal	C11H22O2	1521156	2.04302e+06	1609977	1.77459e+06	2.2223e+06	1.56491e+06	2.2154e+06	1.98399e+06	495373	252493	460341	826351	491013	344444	437246	413213	0.23881	-2.06606	1.43683e-05
2-methyl-decanoic acid	C11H22O2	1521156	2.04302e+06	1609977	1.77459e+06	2.2223e+06	1.56491e+06	2.2154e+06	1.98399e+06	495373	252493	460341	826351	491013	344444	437246	413213	0.23881	-2.06606	1.43683e-05
4-Methyloctyl acetate	C11H22O2	1521156	2.04302e+06	1609977	1.77459e+06	2.2223e+06	1.56491e+06	2.2154e+06	1.98399e+06	495373	252493	460341	826351	491013	344444	437246	413213	0.23881	-2.06606	1.43683e-05
Isopropyl octanoate	C11H22O2	1521156	2.04302e+06	1609977	1.77459e+06	2.2223e+06	1.56491e+06	2.2154e+06	1.98399e+06	495373	252493	460341	826351	491013	344444	437246	413213	0.23881	-2.06606	1.43683e-05
3,7-Dimethyl-6-octenyl formate	C11H22O2	1521156	2.04302e+06	1609977	1.77459e+06	2.2223e+06	1.56491e+06	2.2154e+06	1.98399e+06	495373	252493	460341	826351	491013	344444	437246	413213	0.23881	-2.06606	1.43683e-05
Methyl 3,7-dimethyl-6-octenoate	C11H22O2	1521156	2.04302e+06	1609977	1.77459e+06	2.2223e+06	1.56491e+06	2.2154e+06	1.98399e+06	495373	252493	460341	826351	491013	344444	437246	413213	0.23881	-2.06606	1.43683e-05
ethyl 4-methyl-octanoate	C11H22O2	1521156	2.04302e+06	1609977	1.77459e+06	2.2223e+06	1.56491e+06	2.2154e+06	1.98399e+06	495373	252493	460341	826351	491013	344444	437246	413213	0.23881	-2.06606	1.43683e-05
decyl formate	C11H22O2	1521156	2.04302e+06	1609977	1.77459e+06	2.2223e+06	1.56491e+06	2.2154e+06	1.98399e+06	495373	252493	460341	826351	491013	344444	437246	413213	0.23881	-2.06606	1.43683e-05
2-Hydroxyundecan-6-one	C11H22O2	1521156	2.04302e+06	1609977	1.77459e+06	2.2223e+06	1.56491e+06	2.2154e+06	1.98399e+06	495373	252493	460341	826351	491013	344444	437246	413213	0.23881	-2.06606	1.43683e-05
3,3-dimethyl-nonanoic acid	C11H22O2	1521156	2.04302e+06	1609977	1.77459e+06	2.2223e+06	1.56491e+06	2.2154e+06	1.98399e+06	495373	252493	460341	826351	491013	344444	437246	413213	0.23881	-2.06606	1.43683e-05
6-methyl-decanoic acid	C11H22O2	1521156	2.04302e+06	1609977	1.77459e+06	2.2223e+06	1.56491e+06	2.2154e+06	1.98399e+06	495373	252493	460341	826351	491013	344444	437246	413213	0.23881	-2.06606	1.43683e-05
5-methyl-decanoic acid	C11H22O2	1521156	2.04302e+06	1609977	1.77459e+06	2.2223e+06	1.56491e+06	2.2154e+06	1.98399e+06	495373	252493	460341	826351	491013	344444	437246	413213	0.23881	-2.06606	1.43683e-05
7-methyl-decanoic acid	C11H22O2	1521156	2.04302e+06	1609977	1.77459e+06	2.2223e+06	1.56491e+06	2.2154e+06	1.98399e+06	495373	252493	460341	826351	491013	344444	437246	413213	0.23881	-2.06606	1.43683e-05
4-methyl-decanoic acid	C11H22O2	1521156	2.04302e+06	1609977	1.77459e+06	2.2223e+06	1.56491e+06	2.2154e+06	1.98399e+06	495373	252493	460341	826351	491013	344444	437246	413213	0.23881	-2.06606	1.43683e-05
3-methyl-decanoic acid	C11H22O2	1521156	2.04302e+06	1609977	1.77459e+06	2.2223e+06	1.56491e+06	2.2154e+06	1.98399e+06	495373	252493	460341	826351	491013	344444	437246	413213	0.23881	-2.06606	1.43683e-05
5R-methyl-decanoic acid	C11H22O2	1521156	2.04302e+06	1609977	1.77459e+06	2.2223e+06	1.56491e+06	2.2154e+06	1.98399e+06	495373	252493	460341	826351	491013	344444	437246	413213	0.23881	-2.06606	1.43683e-05
9:0(8Me,8Me)	C11H22O2	1521156	2.04302e+06	1609977	1.77459e+06	2.2223e+06	1.56491e+06	2.2154e+06	1.98399e+06	495373	252493	460341	826351	491013	344444	437246	413213	0.23881	-2.06606	1.43683e-05
6-Pentyl-1,4-dioxan-2-one	C9H16O3	799650	1.07559e+06	1.04515e+06	998577	1.14729e+06	1093040	1683246	1.22389e+06	543900	352374	646096	472857	490587	422198	567244	484995	0.449861	-1.15245	0.00166643
5-Pentyl-1,4-dioxan-2-one	C9H16O3	799650	1.07559e+06	1.04515e+06	998577	1.14729e+06	1093040	1683246	1.22389e+06	543900	352374	646096	472857	490587	422198	567244	484995	0.449861	-1.15245	0.00166643
4-hydroperoxynonenal	C9H16O3	799650	1.07559e+06	1.04515e+06	998577	1.14729e+06	1093040	1683246	1.22389e+06	543900	352374	646096	472857	490587	422198	567244	484995	0.449861	-1.15245	0.00166643
Butyl 3-hydroxy-2-methylidenebutanoate	C9H16O3	799650	1.07559e+06	1.04515e+06	998577	1.14729e+06	1093040	1683246	1.22389e+06	543900	352374	646096	472857	490587	422198	567244	484995	0.449861	-1.15245	0.00166643
2-Methylpropyl 3-hydroxy-2-methylidenebutanoate	C9H16O3	799650	1.07559e+06	1.04515e+06	998577	1.14729e+06	1093040	1683246	1.22389e+06	543900	352374	646096	472857	490587	422198	567244	484995	0.449861	-1.15245	0.00166643
Butyl levulinate	C9H16O3	799650	1.07559e+06	1.04515e+06	998577	1.14729e+06	1093040	1683246	1.22389e+06	543900	352374	646096	472857	490587	422198	567244	484995	0.449861	-1.15245	0.00166643
Tetrahydrofurfuryl butyrate	C9H16O3	799650	1.07559e+06	1.04515e+06	998577	1.14729e+06	1093040	1683246	1.22389e+06	543900	352374	646096	472857	490587	422198	567244	484995	0.449861	-1.15245	0.00166643
cis-3-Hexenyl lactate	C9H16O3	799650	1.07559e+06	1.04515e+06	998577	1.14729e+06	1093040	1683246	1.22389e+06	543900	352374	646096	472857	490587	422198	567244	484995	0.449861	-1.15245	0.00166643
3-Methylbutyl 3-oxobutanoate	C9H16O3	799650	1.07559e+06	1.04515e+06	998577	1.14729e+06	1093040	1683246	1.22389e+06	543900	352374	646096	472857	490587	422198	567244	484995	0.449861	-1.15245	0.00166643
9-oxo-nonanoic acid	C9H16O3	799650	1.07559e+06	1.04515e+06	998577	1.14729e+06	1093040	1683246	1.22389e+06	543900	352374	646096	472857	490587	422198	567244	484995	0.449861	-1.15245	0.00166643
(4S,6S)-4-Hydroxy-1,7-dioxaspiro[5.5]undecane	C9H16O3	799650	1.07559e+06	1.04515e+06	998577	1.14729e+06	1093040	1683246	1.22389e+06	543900	352374	646096	472857	490587	422198	567244	484995	0.449861	-1.15245	0.00166643
(4R,6S)-4-Hydroxy-1,7-dioxaspiro[5.5]undecane	C9H16O3	799650	1.07559e+06	1.04515e+06	998577	1.14729e+06	1093040	1683246	1.22389e+06	543900	352374	646096	472857	490587	422198	567244	484995	0.449861	-1.15245	0.00166643
(3S,6S)-3-Hydroxy-1,7-dioxaspiro[5.5]undecane	C9H16O3	799650	1.07559e+06	1.04515e+06	998577	1.14729e+06	1093040	1683246	1.22389e+06	543900	352374	646096	472857	490587	422198	567244	484995	0.449861	-1.15245	0.00166643
(3R,6S)-3-Hydroxy-1,7-dioxaspiro[5.5]undecane	C9H16O3	799650	1.07559e+06	1.04515e+06	998577	1.14729e+06	1093040	1683246	1.22389e+06	543900	352374	646096	472857	490587	422198	567244	484995	0.449861	-1.15245	0.00166643
4-n-valeryl butyric acid	C9H16O3	799650	1.07559e+06	1.04515e+06	998577	1.14729e+06	1093040	1683246	1.22389e+06	543900	352374	646096	472857	490587	422198	567244	484995	0.449861	-1.15245	0.00166643
3-caproyl propionic acid	C9H16O3	799650	1.07559e+06	1.04515e+06	998577	1.14729e+06	1093040	1683246	1.22389e+06	543900	352374	646096	472857	490587	422198	567244	484995	0.449861	-1.15245	0.00166643
6-propionyl n-caproic acid	C9H16O3	799650	1.07559e+06	1.04515e+06	998577	1.14729e+06	1093040	1683246	1.22389e+06	543900	352374	646096	472857	490587	422198	567244	484995	0.449861	-1.15245	0.00166643
n-butyrl n-valeric acid	C9H16O3	799650	1.07559e+06	1.04515e+06	998577	1.14729e+06	1093040	1683246	1.22389e+06	543900	352374	646096	472857	490587	422198	567244	484995	0.449861	-1.15245	0.00166643
n-heptanoyl acetic acid	C9H16O3	799650	1.07559e+06	1.04515e+06	998577	1.14729e+06	1093040	1683246	1.22389e+06	543900	352374	646096	472857	490587	422198	567244	484995	0.449861	-1.15245	0.00166643
8-oxo-nonanoic acid	C9H16O3	799650	1.07559e+06	1.04515e+06	998577	1.14729e+06	1093040	1683246	1.22389e+06	543900	352374	646096	472857	490587	422198	567244	484995	0.449861	-1.15245	0.00166643
7-methyl-4-oxo-octanoic acid	C9H16O3	799650	1.07559e+06	1.04515e+06	998577	1.14729e+06	1093040	1683246	1.22389e+06	543900	352374	646096	472857	490587	422198	567244	484995	0.449861	-1.15245	0.00166643
3-oxo-nonanoic acid	C9H16O3	799650	1.07559e+06	1.04515e+06	998577	1.14729e+06	1093040	1683246	1.22389e+06	543900	352374	646096	472857	490587	422198	567244	484995	0.449861	-1.15245	0.00166643
7-methyl-6-oxo-octanoic acid	C9H16O3	799650	1.07559e+06	1.04515e+06	998577	1.14729e+06	1093040	1683246	1.22389e+06	543900	352374	646096	472857	490587	422198	567244	484995	0.449861	-1.15245	0.00166643
7-methyl-3-oxooctanoic acid	C9H16O3	799650	1.07559e+06	1.04515e+06	998577	1.14729e+06	1093040	1683246	1.22389e+06	543900	352374	646096	472857	490587	422198	567244	484995	0.449861	-1.15245	0.00166643
9-hydroxy-5Z-nonenoic acid	C9H16O3	799650	1.07559e+06	1.04515e+06	998577	1.14729e+06	1093040	1683246	1.22389e+06	543900	352374	646096	472857	490587	422198	567244	484995	0.449861	-1.15245	0.00166643
Polypropylene glycol (m w 1,200-3,000)	C6H14O3	624262	602984	652014	698812	773127	645105	1056892	816915	124948	125105	292426	148875	334528	169381	391126	240098	0.303132	-1.72198	6.62371e-05
1,2,6-Hexanetriol	C6H14O3	624262	602984	652014	698812	773127	645105	1056892	816915	124948	125105	292426	148875	334528	169381	391126	240098	0.303132	-1.72198	6.62371e-05
3-(2-Hydroxy-4-methylphenyl)-2-butanone	C11H14O2	209319	257550	190757	190533	251260	174309	299341	279620	88021.8	64966.8	180550	183536	121007	41061.3	213243	61189.1	0.453838	-1.13975	0.0136967
2-Phenylethyl propanoate	C11H14O2	209319	257550	190757	190533	251260	174309	299341	279620	88021.8	64966.8	180550	183536	121007	41061.3	213243	61189.1	0.453838	-1.13975	0.0136967
2-Methylpropyl benzoate	C11H14O2	209319	257550	190757	190533	251260	174309	299341	279620	88021.8	64966.8	180550	183536	121007	41061.3	213243	61189.1	0.453838	-1.13975	0.0136967
2-Ethoxy-5-(1-propenyl)phenol	C11H14O2	209319	257550	190757	190533	251260	174309	299341	279620	88021.8	64966.8	180550	183536	121007	41061.3	213243	61189.1	0.453838	-1.13975	0.0136967
Osmorhizole	C11H14O2	209319	257550	190757	190533	251260	174309	299341	279620	88021.8	64966.8	180550	183536	121007	41061.3	213243	61189.1	0.453838	-1.13975	0.0136967
1-Phenylethyl propanoate	C11H14O2	209319	257550	190757	190533	251260	174309	299341	279620	88021.8	64966.8	180550	183536	121007	41061.3	213243	61189.1	0.453838	-1.13975	0.0136967
Ethyl 3-phenylpropanoate	C11H14O2	209319	257550	190757	190533	251260	174309	299341	279620	88021.8	64966.8	180550	183536	121007	41061.3	213243	61189.1	0.453838	-1.13975	0.0136967
Propyl phenylacetate	C11H14O2	209319	257550	190757	190533	251260	174309	299341	279620	88021.8	64966.8	180550	183536	121007	41061.3	213243	61189.1	0.453838	-1.13975	0.0136967
Isopropyl phenylacetate	C11H14O2	209319	257550	190757	190533	251260	174309	299341	279620	88021.8	64966.8	180550	183536	121007	41061.3	213243	61189.1	0.453838	-1.13975	0.0136967
alpha,alpha-Dimethylphenethyl formate	C11H14O2	209319	257550	190757	190533	251260	174309	299341	279620	88021.8	64966.8	180550	183536	121007	41061.3	213243	61189.1	0.453838	-1.13975	0.0136967
Methyl 4-phenylbutanoate	C11H14O2	209319	257550	190757	190533	251260	174309	299341	279620	88021.8	64966.8	180550	183536	121007	41061.3	213243	61189.1	0.453838	-1.13975	0.0136967
Methylisoeugenol	C11H14O2	209319	257550	190757	190533	251260	174309	299341	279620	88021.8	64966.8	180550	183536	121007	41061.3	213243	61189.1	0.453838	-1.13975	0.0136967
5-Phenylvaleric acid	C11H14O2	209319	257550	190757	190533	251260	174309	299341	279620	88021.8	64966.8	180550	183536	121007	41061.3	213243	61189.1	0.453838	-1.13975	0.0136967
Methyleugenol	C11H14O2	209319	257550	190757	190533	251260	174309	299341	279620	88021.8	64966.8	180550	183536	121007	41061.3	213243	61189.1	0.453838	-1.13975	0.0136967
Phenylmethyl 2-methylpropanoate	C11H14O2	209319	257550	190757	190533	251260	174309	299341	279620	88021.8	64966.8	180550	183536	121007	41061.3	213243	61189.1	0.453838	-1.13975	0.0136967
3-Phenylpropyl acetate	C11H14O2	209319	257550	190757	190533	251260	174309	299341	279620	88021.8	64966.8	180550	183536	121007	41061.3	213243	61189.1	0.453838	-1.13975	0.0136967
Phenylmethyl butanoate	C11H14O2	209319	257550	190757	190533	251260	174309	299341	279620	88021.8	64966.8	180550	183536	121007	41061.3	213243	61189.1	0.453838	-1.13975	0.0136967
4-(4-Methoxyphenyl)-2-butanone	C11H14O2	209319	257550	190757	190533	251260	174309	299341	279620	88021.8	64966.8	180550	183536	121007	41061.3	213243	61189.1	0.453838	-1.13975	0.0136967
p-Tolyl isobutyrate	C11H14O2	209319	257550	190757	190533	251260	174309	299341	279620	88021.8	64966.8	180550	183536	121007	41061.3	213243	61189.1	0.453838	-1.13975	0.0136967
2-Methylphenyl 2-methylpropanoate	C11H14O2	209319	257550	190757	190533	251260	174309	299341	279620	88021.8	64966.8	180550	183536	121007	41061.3	213243	61189.1	0.453838	-1.13975	0.0136967
Methylisoeugenol	C11H14O2	209319	257550	190757	190533	251260	174309	299341	279620	88021.8	64966.8	180550	183536	121007	41061.3	213243	61189.1	0.453838	-1.13975	0.0136967
4-t-Butylbenzoic acid	C11H14O2	209319	257550	190757	190533	251260	174309	299341	279620	88021.8	64966.8	180550	183536	121007	41061.3	213243	61189.1	0.453838	-1.13975	0.0136967
1,1-Dimethylethyl benzoate	C11H14O2	209319	257550	190757	190533	251260	174309	299341	279620	88021.8	64966.8	180550	183536	121007	41061.3	213243	61189.1	0.453838	-1.13975	0.0136967
3,5-Dimethoxyallylbenzene	C11H14O2	209319	257550	190757	190533	251260	174309	299341	279620	88021.8	64966.8	180550	183536	121007	41061.3	213243	61189.1	0.453838	-1.13975	0.0136967
1-Phenylpropyl acetate	C11H14O2	209319	257550	190757	190533	251260	174309	299341	279620	88021.8	64966.8	180550	183536	121007	41061.3	213243	61189.1	0.453838	-1.13975	0.0136967
2-Phenylpropyl acetate	C11H14O2	209319	257550	190757	190533	251260	174309	299341	279620	88021.8	64966.8	180550	183536	121007	41061.3	213243	61189.1	0.453838	-1.13975	0.0136967
Imiquimod	C14H16N4	190755	215321	189324	162447	181498	206235	254001	226727	35456.3	29989.5	33824.6	29132.3	34665.5	27261.7	37891.2	34453.5	0.17199	-2.53961	1.78414e-05
(3R,3aR,7aS)-3-Butylhexahydro-1(3H)-isobenzofuranone	C12H20O2	65743.4	80538.1	56871.4	62028.6	70401.1	53480.2	83910.6	71551.6	23924.9	24082.6	31354.4	26067.7	29202.4	18875.6	27707.6	19532.4	0.368361	-1.44081	3.55087e-05
cis-3-Hexenyl cis-3-hexenoate	C12H20O2	65743.4	80538.1	56871.4	62028.6	70401.1	53480.2	83910.6	71551.6	23924.9	24082.6	31354.4	26067.7	29202.4	18875.6	27707.6	19532.4	0.368361	-1.44081	3.55087e-05
cis-3-Hexenyl trans-2-hexenoate	C12H20O2	65743.4	80538.1	56871.4	62028.6	70401.1	53480.2	83910.6	71551.6	23924.9	24082.6	31354.4	26067.7	29202.4	18875.6	27707.6	19532.4	0.368361	-1.44081	3.55087e-05
6-Heptyl-5,6-dihydro-2H-pyran-2-one	C12H20O2	65743.4	80538.1	56871.4	62028.6	70401.1	53480.2	83910.6	71551.6	23924.9	24082.6	31354.4	26067.7	29202.4	18875.6	27707.6	19532.4	0.368361	-1.44081	3.55087e-05
3,7-Dimethyl-2Z,6-octadienyl acetate	C12H20O2	65743.4	80538.1	56871.4	62028.6	70401.1	53480.2	83910.6	71551.6	23924.9	24082.6	31354.4	26067.7	29202.4	18875.6	27707.6	19532.4	0.368361	-1.44081	3.55087e-05
Linalyl acetate	C12H20O2	65743.4	80538.1	56871.4	62028.6	70401.1	53480.2	83910.6	71551.6	23924.9	24082.6	31354.4	26067.7	29202.4	18875.6	27707.6	19532.4	0.368361	-1.44081	3.55087e-05
Fenchyl acetate	C12H20O2	65743.4	80538.1	56871.4	62028.6	70401.1	53480.2	83910.6	71551.6	23924.9	24082.6	31354.4	26067.7	29202.4	18875.6	27707.6	19532.4	0.368361	-1.44081	3.55087e-05
Isopulegol acetate	C12H20O2	65743.4	80538.1	56871.4	62028.6	70401.1	53480.2	83910.6	71551.6	23924.9	24082.6	31354.4	26067.7	29202.4	18875.6	27707.6	19532.4	0.368361	-1.44081	3.55087e-05
Dihydro-5-(2-octenyl)-2(3H)-furanone	C12H20O2	65743.4	80538.1	56871.4	62028.6	70401.1	53480.2	83910.6	71551.6	23924.9	24082.6	31354.4	26067.7	29202.4	18875.6	27707.6	19532.4	0.368361	-1.44081	3.55087e-05
Allyl cyclohexylpropionate	C12H20O2	65743.4	80538.1	56871.4	62028.6	70401.1	53480.2	83910.6	71551.6	23924.9	24082.6	31354.4	26067.7	29202.4	18875.6	27707.6	19532.4	0.368361	-1.44081	3.55087e-05
Methyl 2-undecynoate	C12H20O2	65743.4	80538.1	56871.4	62028.6	70401.1	53480.2	83910.6	71551.6	23924.9	24082.6	31354.4	26067.7	29202.4	18875.6	27707.6	19532.4	0.368361	-1.44081	3.55087e-05
(-)-Bornyl acetate	C12H20O2	65743.4	80538.1	56871.4	62028.6	70401.1	53480.2	83910.6	71551.6	23924.9	24082.6	31354.4	26067.7	29202.4	18875.6	27707.6	19532.4	0.368361	-1.44081	3.55087e-05
alpha-Terpinyl acetate	C12H20O2	65743.4	80538.1	56871.4	62028.6	70401.1	53480.2	83910.6	71551.6	23924.9	24082.6	31354.4	26067.7	29202.4	18875.6	27707.6	19532.4	0.368361	-1.44081	3.55087e-05
alpha-Campholene acetate	C12H20O2	65743.4	80538.1	56871.4	62028.6	70401.1	53480.2	83910.6	71551.6	23924.9	24082.6	31354.4	26067.7	29202.4	18875.6	27707.6	19532.4	0.368361	-1.44081	3.55087e-05
(Z)-4-Hydroxy-6-dodecenoic acid lactone	C12H20O2	65743.4	80538.1	56871.4	62028.6	70401.1	53480.2	83910.6	71551.6	23924.9	24082.6	31354.4	26067.7	29202.4	18875.6	27707.6	19532.4	0.368361	-1.44081	3.55087e-05
3,7-Dimethyl-2,6-octadien-1-ylacetate	C12H20O2	65743.4	80538.1	56871.4	62028.6	70401.1	53480.2	83910.6	71551.6	23924.9	24082.6	31354.4	26067.7	29202.4	18875.6	27707.6	19532.4	0.368361	-1.44081	3.55087e-05
ethyl 2E,4Z-decadienoate	C12H20O2	65743.4	80538.1	56871.4	62028.6	70401.1	53480.2	83910.6	71551.6	23924.9	24082.6	31354.4	26067.7	29202.4	18875.6	27707.6	19532.4	0.368361	-1.44081	3.55087e-05
Artemisia alcohol acetate	C12H20O2	65743.4	80538.1	56871.4	62028.6	70401.1	53480.2	83910.6	71551.6	23924.9	24082.6	31354.4	26067.7	29202.4	18875.6	27707.6	19532.4	0.368361	-1.44081	3.55087e-05
Dihydrocarveol acetate	C12H20O2	65743.4	80538.1	56871.4	62028.6	70401.1	53480.2	83910.6	71551.6	23924.9	24082.6	31354.4	26067.7	29202.4	18875.6	27707.6	19532.4	0.368361	-1.44081	3.55087e-05
(S)-Santolina acetate	C12H20O2	65743.4	80538.1	56871.4	62028.6	70401.1	53480.2	83910.6	71551.6	23924.9	24082.6	31354.4	26067.7	29202.4	18875.6	27707.6	19532.4	0.368361	-1.44081	3.55087e-05
cis-3-Hexenyl trans-4-hexenoate	C12H20O2	65743.4	80538.1	56871.4	62028.6	70401.1	53480.2	83910.6	71551.6	23924.9	24082.6	31354.4	26067.7	29202.4	18875.6	27707.6	19532.4	0.368361	-1.44081	3.55087e-05
p-Menth-1-en-9-ol acetate	C12H20O2	65743.4	80538.1	56871.4	62028.6	70401.1	53480.2	83910.6	71551.6	23924.9	24082.6	31354.4	26067.7	29202.4	18875.6	27707.6	19532.4	0.368361	-1.44081	3.55087e-05
Yuzu lactone	C12H20O2	65743.4	80538.1	56871.4	62028.6	70401.1	53480.2	83910.6	71551.6	23924.9	24082.6	31354.4	26067.7	29202.4	18875.6	27707.6	19532.4	0.368361	-1.44081	3.55087e-05
(1S,2R,4S)-(-)-Bornyl acetate	C12H20O2	65743.4	80538.1	56871.4	62028.6	70401.1	53480.2	83910.6	71551.6	23924.9	24082.6	31354.4	26067.7	29202.4	18875.6	27707.6	19532.4	0.368361	-1.44081	3.55087e-05
3,7-Dimethyl-2E,6-octadienyl acetate	C12H20O2	65743.4	80538.1	56871.4	62028.6	70401.1	53480.2	83910.6	71551.6	23924.9	24082.6	31354.4	26067.7	29202.4	18875.6	27707.6	19532.4	0.368361	-1.44081	3.55087e-05
Linalyl acetate	C12H20O2	65743.4	80538.1	56871.4	62028.6	70401.1	53480.2	83910.6	71551.6	23924.9	24082.6	31354.4	26067.7	29202.4	18875.6	27707.6	19532.4	0.368361	-1.44081	3.55087e-05
beta-Terpinyl acetate	C12H20O2	65743.4	80538.1	56871.4	62028.6	70401.1	53480.2	83910.6	71551.6	23924.9	24082.6	31354.4	26067.7	29202.4	18875.6	27707.6	19532.4	0.368361	-1.44081	3.55087e-05
gamma-Terpinyl acetate	C12H20O2	65743.4	80538.1	56871.4	62028.6	70401.1	53480.2	83910.6	71551.6	23924.9	24082.6	31354.4	26067.7	29202.4	18875.6	27707.6	19532.4	0.368361	-1.44081	3.55087e-05
(1R,2S,4R)-(+)-Bornyl acetate	C12H20O2	65743.4	80538.1	56871.4	62028.6	70401.1	53480.2	83910.6	71551.6	23924.9	24082.6	31354.4	26067.7	29202.4	18875.6	27707.6	19532.4	0.368361	-1.44081	3.55087e-05
8E-Hydroxy-4,8-dimethyl-4,9-decadienal	C12H20O2	65743.4	80538.1	56871.4	62028.6	70401.1	53480.2	83910.6	71551.6	23924.9	24082.6	31354.4	26067.7	29202.4	18875.6	27707.6	19532.4	0.368361	-1.44081	3.55087e-05
7Z,9-Decadienyl acetate	C12H20O2	65743.4	80538.1	56871.4	62028.6	70401.1	53480.2	83910.6	71551.6	23924.9	24082.6	31354.4	26067.7	29202.4	18875.6	27707.6	19532.4	0.368361	-1.44081	3.55087e-05
3E,5E-Decadienyl acetate	C12H20O2	65743.4	80538.1	56871.4	62028.6	70401.1	53480.2	83910.6	71551.6	23924.9	24082.6	31354.4	26067.7	29202.4	18875.6	27707.6	19532.4	0.368361	-1.44081	3.55087e-05
3Z,5E-Decadienyl acetate	C12H20O2	65743.4	80538.1	56871.4	62028.6	70401.1	53480.2	83910.6	71551.6	23924.9	24082.6	31354.4	26067.7	29202.4	18875.6	27707.6	19532.4	0.368361	-1.44081	3.55087e-05
Isopropyl 2,4-dimethyl-2E,4E-heptadienoate	C12H20O2	65743.4	80538.1	56871.4	62028.6	70401.1	53480.2	83910.6	71551.6	23924.9	24082.6	31354.4	26067.7	29202.4	18875.6	27707.6	19532.4	0.368361	-1.44081	3.55087e-05
(E)-2-Hexenyl (E)-2-hexenoate	C12H20O2	65743.4	80538.1	56871.4	62028.6	70401.1	53480.2	83910.6	71551.6	23924.9	24082.6	31354.4	26067.7	29202.4	18875.6	27707.6	19532.4	0.368361	-1.44081	3.55087e-05
(E)-2-Hexenyl (Z)-3-hexenoate	C12H20O2	65743.4	80538.1	56871.4	62028.6	70401.1	53480.2	83910.6	71551.6	23924.9	24082.6	31354.4	26067.7	29202.4	18875.6	27707.6	19532.4	0.368361	-1.44081	3.55087e-05
Ethyl (E)-7,9-decadienoate	C12H20O2	65743.4	80538.1	56871.4	62028.6	70401.1	53480.2	83910.6	71551.6	23924.9	24082.6	31354.4	26067.7	29202.4	18875.6	27707.6	19532.4	0.368361	-1.44081	3.55087e-05
Buibuilactone	C12H20O2	65743.4	80538.1	56871.4	62028.6	70401.1	53480.2	83910.6	71551.6	23924.9	24082.6	31354.4	26067.7	29202.4	18875.6	27707.6	19532.4	0.368361	-1.44081	3.55087e-05
Cucujolide II	C12H20O2	65743.4	80538.1	56871.4	62028.6	70401.1	53480.2	83910.6	71551.6	23924.9	24082.6	31354.4	26067.7	29202.4	18875.6	27707.6	19532.4	0.368361	-1.44081	3.55087e-05
Cucujolide VIII	C12H20O2	65743.4	80538.1	56871.4	62028.6	70401.1	53480.2	83910.6	71551.6	23924.9	24082.6	31354.4	26067.7	29202.4	18875.6	27707.6	19532.4	0.368361	-1.44081	3.55087e-05
S-Cucujolide II	C12H20O2	65743.4	80538.1	56871.4	62028.6	70401.1	53480.2	83910.6	71551.6	23924.9	24082.6	31354.4	26067.7	29202.4	18875.6	27707.6	19532.4	0.368361	-1.44081	3.55087e-05
5-Dodecen-11-olide	C12H20O2	65743.4	80538.1	56871.4	62028.6	70401.1	53480.2	83910.6	71551.6	23924.9	24082.6	31354.4	26067.7	29202.4	18875.6	27707.6	19532.4	0.368361	-1.44081	3.55087e-05
9-dodecynoic acid	C12H20O2	65743.4	80538.1	56871.4	62028.6	70401.1	53480.2	83910.6	71551.6	23924.9	24082.6	31354.4	26067.7	29202.4	18875.6	27707.6	19532.4	0.368361	-1.44081	3.55087e-05
8-dodecynoic acid	C12H20O2	65743.4	80538.1	56871.4	62028.6	70401.1	53480.2	83910.6	71551.6	23924.9	24082.6	31354.4	26067.7	29202.4	18875.6	27707.6	19532.4	0.368361	-1.44081	3.55087e-05
7-dodecynoic acid	C12H20O2	65743.4	80538.1	56871.4	62028.6	70401.1	53480.2	83910.6	71551.6	23924.9	24082.6	31354.4	26067.7	29202.4	18875.6	27707.6	19532.4	0.368361	-1.44081	3.55087e-05
6-dodecynoic acid	C12H20O2	65743.4	80538.1	56871.4	62028.6	70401.1	53480.2	83910.6	71551.6	23924.9	24082.6	31354.4	26067.7	29202.4	18875.6	27707.6	19532.4	0.368361	-1.44081	3.55087e-05
5-dodecynoic acid	C12H20O2	65743.4	80538.1	56871.4	62028.6	70401.1	53480.2	83910.6	71551.6	23924.9	24082.6	31354.4	26067.7	29202.4	18875.6	27707.6	19532.4	0.368361	-1.44081	3.55087e-05
4-dodecynoic acid	C12H20O2	65743.4	80538.1	56871.4	62028.6	70401.1	53480.2	83910.6	71551.6	23924.9	24082.6	31354.4	26067.7	29202.4	18875.6	27707.6	19532.4	0.368361	-1.44081	3.55087e-05
3-dodecynoic acid	C12H20O2	65743.4	80538.1	56871.4	62028.6	70401.1	53480.2	83910.6	71551.6	23924.9	24082.6	31354.4	26067.7	29202.4	18875.6	27707.6	19532.4	0.368361	-1.44081	3.55087e-05
11-dodecynoic acid	C12H20O2	65743.4	80538.1	56871.4	62028.6	70401.1	53480.2	83910.6	71551.6	23924.9	24082.6	31354.4	26067.7	29202.4	18875.6	27707.6	19532.4	0.368361	-1.44081	3.55087e-05
10-dodecynoic acid	C12H20O2	65743.4	80538.1	56871.4	62028.6	70401.1	53480.2	83910.6	71551.6	23924.9	24082.6	31354.4	26067.7	29202.4	18875.6	27707.6	19532.4	0.368361	-1.44081	3.55087e-05
cis,cis-dodeca-3,6-dienoic acid	C12H20O2	65743.4	80538.1	56871.4	62028.6	70401.1	53480.2	83910.6	71551.6	23924.9	24082.6	31354.4	26067.7	29202.4	18875.6	27707.6	19532.4	0.368361	-1.44081	3.55087e-05
2E,4E-dodecadienoic acid	C12H20O2	65743.4	80538.1	56871.4	62028.6	70401.1	53480.2	83910.6	71551.6	23924.9	24082.6	31354.4	26067.7	29202.4	18875.6	27707.6	19532.4	0.368361	-1.44081	3.55087e-05
2Z,8E-dodecadienoic acid	C12H20O2	65743.4	80538.1	56871.4	62028.6	70401.1	53480.2	83910.6	71551.6	23924.9	24082.6	31354.4	26067.7	29202.4	18875.6	27707.6	19532.4	0.368361	-1.44081	3.55087e-05
2E,8Z-dodecadienoic acid	C12H20O2	65743.4	80538.1	56871.4	62028.6	70401.1	53480.2	83910.6	71551.6	23924.9	24082.6	31354.4	26067.7	29202.4	18875.6	27707.6	19532.4	0.368361	-1.44081	3.55087e-05
2E,8E-dodecadienoic acid	C12H20O2	65743.4	80538.1	56871.4	62028.6	70401.1	53480.2	83910.6	71551.6	23924.9	24082.6	31354.4	26067.7	29202.4	18875.6	27707.6	19532.4	0.368361	-1.44081	3.55087e-05
2E,6Z-dodecadienoic acid	C12H20O2	65743.4	80538.1	56871.4	62028.6	70401.1	53480.2	83910.6	71551.6	23924.9	24082.6	31354.4	26067.7	29202.4	18875.6	27707.6	19532.4	0.368361	-1.44081	3.55087e-05
8E,10E-dodecadienoic acid	C12H20O2	65743.4	80538.1	56871.4	62028.6	70401.1	53480.2	83910.6	71551.6	23924.9	24082.6	31354.4	26067.7	29202.4	18875.6	27707.6	19532.4	0.368361	-1.44081	3.55087e-05
7Z,9E-dodecadienoic acid	C12H20O2	65743.4	80538.1	56871.4	62028.6	70401.1	53480.2	83910.6	71551.6	23924.9	24082.6	31354.4	26067.7	29202.4	18875.6	27707.6	19532.4	0.368361	-1.44081	3.55087e-05
5E,7E-dodecadienoic acid	C12H20O2	65743.4	80538.1	56871.4	62028.6	70401.1	53480.2	83910.6	71551.6	23924.9	24082.6	31354.4	26067.7	29202.4	18875.6	27707.6	19532.4	0.368361	-1.44081	3.55087e-05
2Z,8Z-dodecadienoic acid	C12H20O2	65743.4	80538.1	56871.4	62028.6	70401.1	53480.2	83910.6	71551.6	23924.9	24082.6	31354.4	26067.7	29202.4	18875.6	27707.6	19532.4	0.368361	-1.44081	3.55087e-05
8Z,10E-dodecadienoic acid	C12H20O2	65743.4	80538.1	56871.4	62028.6	70401.1	53480.2	83910.6	71551.6	23924.9	24082.6	31354.4	26067.7	29202.4	18875.6	27707.6	19532.4	0.368361	-1.44081	3.55087e-05
Aleprylic acid	C12H20O2	65743.4	80538.1	56871.4	62028.6	70401.1	53480.2	83910.6	71551.6	23924.9	24082.6	31354.4	26067.7	29202.4	18875.6	27707.6	19532.4	0.368361	-1.44081	3.55087e-05
cis-3-Hexenyl pyruvate	C9H14O3	204557	209415	261791	327670	347784	224269	419617	313412	124122	129168	125237	134045	113766	103581	135261	97241.4	0.433514	-1.20585	0.00427366
1,4-Ipomeadiol	C9H14O3	204557	209415	261791	327670	347784	224269	419617	313412	124122	129168	125237	134045	113766	103581	135261	97241.4	0.433514	-1.20585	0.00427366
Furfural diethyl acetal	C9H14O3	204557	209415	261791	327670	347784	224269	419617	313412	124122	129168	125237	134045	113766	103581	135261	97241.4	0.433514	-1.20585	0.00427366
Phaseolic acid	C12H22O6	65091.4	83623.2	120289	182683	171950	122690	244058	140246	34108.9	76307.8	23074.5	25540.6	0	118771	28077.8	0	0.203923	-2.29391	0.0116933
Triethylene glycol diglycidyl ether	C12H22O6	65091.4	83623.2	120289	182683	171950	122690	244058	140246	34108.9	76307.8	23074.5	25540.6	0	118771	28077.8	0	0.203923	-2.29391	0.0116933
3R-hydroxy-hexanoic acid	C6H12O3	334007	327211	252096	272780	307163	293697	376911	401865	102897	133051	119774	109473	144690	113790	108558	89073.9	0.351942	-1.50659	4.43646e-05
5R-hydroxy-hexanoic acid	C6H12O3	334007	327211	252096	272780	307163	293697	376911	401865	102897	133051	119774	109473	144690	113790	108558	89073.9	0.351942	-1.50659	4.43646e-05
5-hydroxy caproic acid	C6H12O3	334007	327211	252096	272780	307163	293697	376911	401865	102897	133051	119774	109473	144690	113790	108558	89073.9	0.351942	-1.50659	4.43646e-05
D-Leucic acid	C6H12O3	334007	327211	252096	272780	307163	293697	376911	401865	102897	133051	119774	109473	144690	113790	108558	89073.9	0.351942	-1.50659	4.43646e-05
Leucinic acid	C6H12O3	334007	327211	252096	272780	307163	293697	376911	401865	102897	133051	119774	109473	144690	113790	108558	89073.9	0.351942	-1.50659	4.43646e-05
hydroxy-isocaproic acid	C6H12O3	334007	327211	252096	272780	307163	293697	376911	401865	102897	133051	119774	109473	144690	113790	108558	89073.9	0.351942	-1.50659	4.43646e-05
2-hydroxy-3-methyl-pentanoic acid	C6H12O3	334007	327211	252096	272780	307163	293697	376911	401865	102897	133051	119774	109473	144690	113790	108558	89073.9	0.351942	-1.50659	4.43646e-05
4,4-Dimethoxy-2-butanone	C6H12O3	334007	327211	252096	272780	307163	293697	376911	401865	102897	133051	119774	109473	144690	113790	108558	89073.9	0.351942	-1.50659	4.43646e-05
Threo-3-Hydroxy-2-methylbutyric acid	C6H12O3	334007	327211	252096	272780	307163	293697	376911	401865	102897	133051	119774	109473	144690	113790	108558	89073.9	0.351942	-1.50659	4.43646e-05
2-ethyl-2-hydroxy-butyric acid	C6H12O3	334007	327211	252096	272780	307163	293697	376911	401865	102897	133051	119774	109473	144690	113790	108558	89073.9	0.351942	-1.50659	4.43646e-05
DL-2-hydroxy caproic acid	C6H12O3	334007	327211	252096	272780	307163	293697	376911	401865	102897	133051	119774	109473	144690	113790	108558	89073.9	0.351942	-1.50659	4.43646e-05
Ethyl (±)-3-hydroxybutyrate	C6H12O3	334007	327211	252096	272780	307163	293697	376911	401865	102897	133051	119774	109473	144690	113790	108558	89073.9	0.351942	-1.50659	4.43646e-05
2-Methyl-3-hydroxyvaleric acid	C6H12O3	334007	327211	252096	272780	307163	293697	376911	401865	102897	133051	119774	109473	144690	113790	108558	89073.9	0.351942	-1.50659	4.43646e-05
(+/-)-1-Acetoxy-1-ethoxyethane	C6H12O3	334007	327211	252096	272780	307163	293697	376911	401865	102897	133051	119774	109473	144690	113790	108558	89073.9	0.351942	-1.50659	4.43646e-05
6-Hydroxyhexanoic acid	C6H12O3	334007	327211	252096	272780	307163	293697	376911	401865	102897	133051	119774	109473	144690	113790	108558	89073.9	0.351942	-1.50659	4.43646e-05
DL-3-hydroxy caproic acid	C6H12O3	334007	327211	252096	272780	307163	293697	376911	401865	102897	133051	119774	109473	144690	113790	108558	89073.9	0.351942	-1.50659	4.43646e-05
Butoxyacetic acid	C6H12O3	334007	327211	252096	272780	307163	293697	376911	401865	102897	133051	119774	109473	144690	113790	108558	89073.9	0.351942	-1.50659	4.43646e-05
Paraldehyde	C6H12O3	334007	327211	252096	272780	307163	293697	376911	401865	102897	133051	119774	109473	144690	113790	108558	89073.9	0.351942	-1.50659	4.43646e-05
Ethyl (R)-3-hydroxybutanoate	C6H12O3	334007	327211	252096	272780	307163	293697	376911	401865	102897	133051	119774	109473	144690	113790	108558	89073.9	0.351942	-1.50659	4.43646e-05
DL-4-hydroxy caproic acid	C6H12O3	334007	327211	252096	272780	307163	293697	376911	401865	102897	133051	119774	109473	144690	113790	108558	89073.9	0.351942	-1.50659	4.43646e-05
N-Decanoylglycine	C12H23NO3	100962	106226	55260.1	56717.5	111105	115403	183824	207930	38042.5	64837.1	42958.5	54672.6	30129.8	58440.3	25890.3	25085.9	0.372708	-1.42388	0.0363875

## Sheet: 26post-S vs. 26post-C 
List of significant metabolite features based on fc and q values between 26post-S vs. 26post-C
Name	Formula	26post-C1	26post-C2	26post-C3	26post-C4	26post-C5	26post-C6	26post-C7	26post-C8	26post-S1	26post-S2	26post-S3	26post-S4	26post-S5	26post-S6	26post-S7	26post-S8	FC.26.PPOST	LOG.26.PPPOST	q
Diisopropyl phosphate	C6H15O4P	37250.7	22076	47294.3	44896.6	31039.1	38327.4	45802	75978	105745	81671.5	94360.9	160489	104550	150064	95158.3	70104.6	2.39964	1.26282	0.00526746
3,4-Methyleneazelaic acid	C11H16O4	26078.9	21989.5	26043.2	33840.5	24576.1	26475.1	28570.6	45176.4	62388.2	52577.1	53506.5	30637.8	33534.8	57406.1	48548.4	75577.2	2.01856	1.01333	0.0245178
1,4-beta-D-Glucan	C18H32O18	49494.5	41609.1	51831.6	43807.9	51622.3	58181.1	34150	109653	137115	69246.1	83996.7	147855	85274.4	119486	114395	100414	2.12436	1.08703	0.012349
Metenamine	C6H12N4	9594.83	12038.2	11903.3	6014.1	0	7463.41	6424.67	49377.9	45705.2	41002	67291.5	52159.8	60489.1	68689.9	65073.2	17478.6	6.60378	2.72329	0.00453486
Synephrine acetonide	C12H17NO2	26431.4	18950.6	21595.4	22393.1	30885.8	23951.7	23900.5	33052.4	62489.7	49663.4	46445.2	30859.1	24436.9	47004.3	51329.8	59168.6	2.02013	1.01445	0.0174293
Ciclopirox	C12H17NO2	26431.4	18950.6	21595.4	22393.1	30885.8	23951.7	23900.5	33052.4	62489.7	49663.4	46445.2	30859.1	24436.9	47004.3	51329.8	59168.6	2.02013	1.01445	0.0174293
O-Methylcorypalline	C12H17NO2	26431.4	18950.6	21595.4	22393.1	30885.8	23951.7	23900.5	33052.4	62489.7	49663.4	46445.2	30859.1	24436.9	47004.3	51329.8	59168.6	2.02013	1.01445	0.0174293
1-(2,3-Dihydro-6,7-dimethyl-1H-pyrrolizin-5-yl)-2-hydroxy-1-propanone	C12H17NO2	26431.4	18950.6	21595.4	22393.1	30885.8	23951.7	23900.5	33052.4	62489.7	49663.4	46445.2	30859.1	24436.9	47004.3	51329.8	59168.6	2.02013	1.01445	0.0174293
Isobutyl N-methylanthranilate	C12H17NO2	26431.4	18950.6	21595.4	22393.1	30885.8	23951.7	23900.5	33052.4	62489.7	49663.4	46445.2	30859.1	24436.9	47004.3	51329.8	59168.6	2.02013	1.01445	0.0174293
3-(Dimethylamino)propyl benzoate	C12H17NO2	26431.4	18950.6	21595.4	22393.1	30885.8	23951.7	23900.5	33052.4	62489.7	49663.4	46445.2	30859.1	24436.9	47004.3	51329.8	59168.6	2.02013	1.01445	0.0174293
Fenobucarb	C12H17NO2	26431.4	18950.6	21595.4	22393.1	30885.8	23951.7	23900.5	33052.4	62489.7	49663.4	46445.2	30859.1	24436.9	47004.3	51329.8	59168.6	2.02013	1.01445	0.0174293
Promecarb	C12H17NO2	26431.4	18950.6	21595.4	22393.1	30885.8	23951.7	23900.5	33052.4	62489.7	49663.4	46445.2	30859.1	24436.9	47004.3	51329.8	59168.6	2.02013	1.01445	0.0174293
Ethyl (±)-3-methylpentanoate	C8H16O2	4.68692e+06	1.93052e+06	3824784	3377617	6.38554e+06	4767635	4082351	9323195	10754048	10261651	10583869	8405435	9389185	9379104	8.3701e+06	13157533	2.24088	1.16406	0.00412013
Heptyl formate	C8H16O2	4.68692e+06	1.93052e+06	3824784	3377617	6.38554e+06	4767635	4082351	9323195	10754048	10261651	10583869	8405435	9389185	9379104	8.3701e+06	13157533	2.24088	1.16406	0.00412013
Caprylic acid	C8H16O2	4.68692e+06	1.93052e+06	3824784	3377617	6.38554e+06	4767635	4082351	9323195	10754048	10261651	10583869	8405435	9389185	9379104	8.3701e+06	13157533	2.24088	1.16406	0.00412013
2-Methylpropyl butanoate	C8H16O2	4.68692e+06	1.93052e+06	3824784	3377617	6.38554e+06	4767635	4082351	9323195	10754048	10261651	10583869	8405435	9389185	9379104	8.3701e+06	13157533	2.24088	1.16406	0.00412013
3-Methylbutyl propanoate	C8H16O2	4.68692e+06	1.93052e+06	3824784	3377617	6.38554e+06	4767635	4082351	9323195	10754048	10261651	10583869	8405435	9389185	9379104	8.3701e+06	13157533	2.24088	1.16406	0.00412013
Valproic acid	C8H16O2	4.68692e+06	1.93052e+06	3824784	3377617	6.38554e+06	4767635	4082351	9323195	10754048	10261651	10583869	8405435	9389185	9379104	8.3701e+06	13157533	2.24088	1.16406	0.00412013
(±)-5-Hydroxy-4-octanone	C8H16O2	4.68692e+06	1.93052e+06	3824784	3377617	6.38554e+06	4767635	4082351	9323195	10754048	10261651	10583869	8405435	9389185	9379104	8.3701e+06	13157533	2.24088	1.16406	0.00412013
butryl butyrate	C8H16O2	4.68692e+06	1.93052e+06	3824784	3377617	6.38554e+06	4767635	4082351	9323195	10754048	10261651	10583869	8405435	9389185	9379104	8.3701e+06	13157533	2.24088	1.16406	0.00412013
2-Methylpropyl 2-methylpropionate	C8H16O2	4.68692e+06	1.93052e+06	3824784	3377617	6.38554e+06	4767635	4082351	9323195	10754048	10261651	10583869	8405435	9389185	9379104	8.3701e+06	13157533	2.24088	1.16406	0.00412013
Butyl isobutyrate	C8H16O2	4.68692e+06	1.93052e+06	3824784	3377617	6.38554e+06	4767635	4082351	9323195	10754048	10261651	10583869	8405435	9389185	9379104	8.3701e+06	13157533	2.24088	1.16406	0.00412013
Isopropyl 2-methylbutanoate	C8H16O2	4.68692e+06	1.93052e+06	3824784	3377617	6.38554e+06	4767635	4082351	9323195	10754048	10261651	10583869	8405435	9389185	9379104	8.3701e+06	13157533	2.24088	1.16406	0.00412013
ethyl hexanoate	C8H16O2	4.68692e+06	1.93052e+06	3824784	3377617	6.38554e+06	4767635	4082351	9323195	10754048	10261651	10583869	8405435	9389185	9379104	8.3701e+06	13157533	2.24088	1.16406	0.00412013
Hexyl acetate	C8H16O2	4.68692e+06	1.93052e+06	3824784	3377617	6.38554e+06	4767635	4082351	9323195	10754048	10261651	10583869	8405435	9389185	9379104	8.3701e+06	13157533	2.24088	1.16406	0.00412013
Propyl pentanoate	C8H16O2	4.68692e+06	1.93052e+06	3824784	3377617	6.38554e+06	4767635	4082351	9323195	10754048	10261651	10583869	8405435	9389185	9379104	8.3701e+06	13157533	2.24088	1.16406	0.00412013
Ethyl 2-ethylbutanoate	C8H16O2	4.68692e+06	1.93052e+06	3824784	3377617	6.38554e+06	4767635	4082351	9323195	10754048	10261651	10583869	8405435	9389185	9379104	8.3701e+06	13157533	2.24088	1.16406	0.00412013
(3R,5Z)-5-Octene-1,3-diol	C8H16O2	4.68692e+06	1.93052e+06	3824784	3377617	6.38554e+06	4767635	4082351	9323195	10754048	10261651	10583869	8405435	9389185	9379104	8.3701e+06	13157533	2.24088	1.16406	0.00412013
Propyl 3-methylbutanoate	C8H16O2	4.68692e+06	1.93052e+06	3824784	3377617	6.38554e+06	4767635	4082351	9323195	10754048	10261651	10583869	8405435	9389185	9379104	8.3701e+06	13157533	2.24088	1.16406	0.00412013
Isopropyl 3-methylbutanoate	C8H16O2	4.68692e+06	1.93052e+06	3824784	3377617	6.38554e+06	4767635	4082351	9323195	10754048	10261651	10583869	8405435	9389185	9379104	8.3701e+06	13157533	2.24088	1.16406	0.00412013
cis- and trans-2-Isobutyl-4-methyl-1,3-dioxolane	C8H16O2	4.68692e+06	1.93052e+06	3824784	3377617	6.38554e+06	4767635	4082351	9323195	10754048	10261651	10583869	8405435	9389185	9379104	8.3701e+06	13157533	2.24088	1.16406	0.00412013
1,1-Dimethoxy-trans-2-hexene	C8H16O2	4.68692e+06	1.93052e+06	3824784	3377617	6.38554e+06	4767635	4082351	9323195	10754048	10261651	10583869	8405435	9389185	9379104	8.3701e+06	13157533	2.24088	1.16406	0.00412013
Ethyl 4-methylpentanoate	C8H16O2	4.68692e+06	1.93052e+06	3824784	3377617	6.38554e+06	4767635	4082351	9323195	10754048	10261651	10583869	8405435	9389185	9379104	8.3701e+06	13157533	2.24088	1.16406	0.00412013
3-Hydroxyoctan-2-one	C8H16O2	4.68692e+06	1.93052e+06	3824784	3377617	6.38554e+06	4767635	4082351	9323195	10754048	10261651	10583869	8405435	9389185	9379104	8.3701e+06	13157533	2.24088	1.16406	0.00412013
Tetrahydro-2,5-dimethyl-2H-pyranmethanol	C8H16O2	4.68692e+06	1.93052e+06	3824784	3377617	6.38554e+06	4767635	4082351	9323195	10754048	10261651	10583869	8405435	9389185	9379104	8.3701e+06	13157533	2.24088	1.16406	0.00412013
3-(Hydroxymethyl)-2-heptanone	C8H16O2	4.68692e+06	1.93052e+06	3824784	3377617	6.38554e+06	4767635	4082351	9323195	10754048	10261651	10583869	8405435	9389185	9379104	8.3701e+06	13157533	2.24088	1.16406	0.00412013
Pentyl propanoate	C8H16O2	4.68692e+06	1.93052e+06	3824784	3377617	6.38554e+06	4767635	4082351	9323195	10754048	10261651	10583869	8405435	9389185	9379104	8.3701e+06	13157533	2.24088	1.16406	0.00412013
Methyl 5-methylhexanoate	C8H16O2	4.68692e+06	1.93052e+06	3824784	3377617	6.38554e+06	4767635	4082351	9323195	10754048	10261651	10583869	8405435	9389185	9379104	8.3701e+06	13157533	2.24088	1.16406	0.00412013
6-methyl-heptanoic acid	C8H16O2	4.68692e+06	1.93052e+06	3824784	3377617	6.38554e+06	4767635	4082351	9323195	10754048	10261651	10583869	8405435	9389185	9379104	8.3701e+06	13157533	2.24088	1.16406	0.00412013
2-Methylheptanoic acid	C8H16O2	4.68692e+06	1.93052e+06	3824784	3377617	6.38554e+06	4767635	4082351	9323195	10754048	10261651	10583869	8405435	9389185	9379104	8.3701e+06	13157533	2.24088	1.16406	0.00412013
Ethyl (±)-2-methylpentanoate	C8H16O2	4.68692e+06	1.93052e+06	3824784	3377617	6.38554e+06	4767635	4082351	9323195	10754048	10261651	10583869	8405435	9389185	9379104	8.3701e+06	13157533	2.24088	1.16406	0.00412013
2-Ethylbutyl acetate	C8H16O2	4.68692e+06	1.93052e+06	3824784	3377617	6.38554e+06	4767635	4082351	9323195	10754048	10261651	10583869	8405435	9389185	9379104	8.3701e+06	13157533	2.24088	1.16406	0.00412013
alpha-ethyl caproic acid	C8H16O2	4.68692e+06	1.93052e+06	3824784	3377617	6.38554e+06	4767635	4082351	9323195	10754048	10261651	10583869	8405435	9389185	9379104	8.3701e+06	13157533	2.24088	1.16406	0.00412013
1-Hydroxy-3-octanone	C8H16O2	4.68692e+06	1.93052e+06	3824784	3377617	6.38554e+06	4767635	4082351	9323195	10754048	10261651	10583869	8405435	9389185	9379104	8.3701e+06	13157533	2.24088	1.16406	0.00412013
Methyl heptanoate	C8H16O2	4.68692e+06	1.93052e+06	3824784	3377617	6.38554e+06	4767635	4082351	9323195	10754048	10261651	10583869	8405435	9389185	9379104	8.3701e+06	13157533	2.24088	1.16406	0.00412013
Valeraldehyde propyleneglycol acetal	C8H16O2	4.68692e+06	1.93052e+06	3824784	3377617	6.38554e+06	4767635	4082351	9323195	10754048	10261651	10583869	8405435	9389185	9379104	8.3701e+06	13157533	2.24088	1.16406	0.00412013
3R-Hydroxyoctan-2-one	C8H16O2	4.68692e+06	1.93052e+06	3824784	3377617	6.38554e+06	4767635	4082351	9323195	10754048	10261651	10583869	8405435	9389185	9379104	8.3701e+06	13157533	2.24088	1.16406	0.00412013
2-Hydroxyoctan-3-one	C8H16O2	4.68692e+06	1.93052e+06	3824784	3377617	6.38554e+06	4767635	4082351	9323195	10754048	10261651	10583869	8405435	9389185	9379104	8.3701e+06	13157533	2.24088	1.16406	0.00412013
2S-Hydroxyoctan-3-one	C8H16O2	4.68692e+06	1.93052e+06	3824784	3377617	6.38554e+06	4767635	4082351	9323195	10754048	10261651	10583869	8405435	9389185	9379104	8.3701e+06	13157533	2.24088	1.16406	0.00412013
5R-Hydroxy-4S-methylheptan-3-one	C8H16O2	4.68692e+06	1.93052e+06	3824784	3377617	6.38554e+06	4767635	4082351	9323195	10754048	10261651	10583869	8405435	9389185	9379104	8.3701e+06	13157533	2.24088	1.16406	0.00412013
2-Hydroxy-2-methylheptan-4-one	C8H16O2	4.68692e+06	1.93052e+06	3824784	3377617	6.38554e+06	4767635	4082351	9323195	10754048	10261651	10583869	8405435	9389185	9379104	8.3701e+06	13157533	2.24088	1.16406	0.00412013
4-ethyl-hexanoic acid	C8H16O2	4.68692e+06	1.93052e+06	3824784	3377617	6.38554e+06	4767635	4082351	9323195	10754048	10261651	10583869	8405435	9389185	9379104	8.3701e+06	13157533	2.24088	1.16406	0.00412013
5-methyl-heptanoic acid	C8H16O2	4.68692e+06	1.93052e+06	3824784	3377617	6.38554e+06	4767635	4082351	9323195	10754048	10261651	10583869	8405435	9389185	9379104	8.3701e+06	13157533	2.24088	1.16406	0.00412013
3-methyl-heptanoic acid	C8H16O2	4.68692e+06	1.93052e+06	3824784	3377617	6.38554e+06	4767635	4082351	9323195	10754048	10261651	10583869	8405435	9389185	9379104	8.3701e+06	13157533	2.24088	1.16406	0.00412013
2-ethyl-2-methyl valeric ccid	C8H16O2	4.68692e+06	1.93052e+06	3824784	3377617	6.38554e+06	4767635	4082351	9323195	10754048	10261651	10583869	8405435	9389185	9379104	8.3701e+06	13157533	2.24088	1.16406	0.00412013
2,2-dimethyl-hexanoic acid	C8H16O2	4.68692e+06	1.93052e+06	3824784	3377617	6.38554e+06	4767635	4082351	9323195	10754048	10261651	10583869	8405435	9389185	9379104	8.3701e+06	13157533	2.24088	1.16406	0.00412013
3R-Methylheptanoic acid	C8H16O2	4.68692e+06	1.93052e+06	3824784	3377617	6.38554e+06	4767635	4082351	9323195	10754048	10261651	10583869	8405435	9389185	9379104	8.3701e+06	13157533	2.24088	1.16406	0.00412013
butylisobutyrate (+ isobutylisobutyrate)	C8H16O2	4.68692e+06	1.93052e+06	3824784	3377617	6.38554e+06	4767635	4082351	9323195	10754048	10261651	10583869	8405435	9389185	9379104	8.3701e+06	13157533	2.24088	1.16406	0.00412013
Caproic acid	C6H12O2	2.28737e+06	1.12185e+06	2.00102e+06	1.85176e+06	2.33975e+06	2.17494e+06	1.74504e+06	5.44662e+06	7.91373e+06	5.87764e+06	7204554	5795842	6.48245e+06	6459593	5745489	10392577	3.09918	1.63189	0.00179582
Isocaproic acid	C6H12O2	2.28737e+06	1.12185e+06	2.00102e+06	1.85176e+06	2.33975e+06	2.17494e+06	1.74504e+06	5.44662e+06	7.91373e+06	5.87764e+06	7204554	5795842	6.48245e+06	6459593	5745489	10392577	3.09918	1.63189	0.00179582
Isoamyl formate	C6H12O2	2.28737e+06	1.12185e+06	2.00102e+06	1.85176e+06	2.33975e+06	2.17494e+06	1.74504e+06	5.44662e+06	7.91373e+06	5.87764e+06	7204554	5795842	6.48245e+06	6459593	5745489	10392577	3.09918	1.63189	0.00179582
3-methyl valeric acid	C6H12O2	2.28737e+06	1.12185e+06	2.00102e+06	1.85176e+06	2.33975e+06	2.17494e+06	1.74504e+06	5.44662e+06	7.91373e+06	5.87764e+06	7204554	5795842	6.48245e+06	6459593	5745489	10392577	3.09918	1.63189	0.00179582
Ethyl butyrate	C6H12O2	2.28737e+06	1.12185e+06	2.00102e+06	1.85176e+06	2.33975e+06	2.17494e+06	1.74504e+06	5.44662e+06	7.91373e+06	5.87764e+06	7204554	5795842	6.48245e+06	6459593	5745489	10392577	3.09918	1.63189	0.00179582
Methyl (S)-2-Methylbutanoate	C6H12O2	2.28737e+06	1.12185e+06	2.00102e+06	1.85176e+06	2.33975e+06	2.17494e+06	1.74504e+06	5.44662e+06	7.91373e+06	5.87764e+06	7204554	5795842	6.48245e+06	6459593	5745489	10392577	3.09918	1.63189	0.00179582
Pentyl formate	C6H12O2	2.28737e+06	1.12185e+06	2.00102e+06	1.85176e+06	2.33975e+06	2.17494e+06	1.74504e+06	5.44662e+06	7.91373e+06	5.87764e+06	7204554	5795842	6.48245e+06	6459593	5745489	10392577	3.09918	1.63189	0.00179582
2,4,5-Trimethyl-1,3-dioxolane	C6H12O2	2.28737e+06	1.12185e+06	2.00102e+06	1.85176e+06	2.33975e+06	2.17494e+06	1.74504e+06	5.44662e+06	7.91373e+06	5.87764e+06	7204554	5795842	6.48245e+06	6459593	5745489	10392577	3.09918	1.63189	0.00179582
Methyl 3-methylbutanoate	C6H12O2	2.28737e+06	1.12185e+06	2.00102e+06	1.85176e+06	2.33975e+06	2.17494e+06	1.74504e+06	5.44662e+06	7.91373e+06	5.87764e+06	7204554	5795842	6.48245e+06	6459593	5745489	10392577	3.09918	1.63189	0.00179582
propyl propionate	C6H12O2	2.28737e+06	1.12185e+06	2.00102e+06	1.85176e+06	2.33975e+06	2.17494e+06	1.74504e+06	5.44662e+06	7.91373e+06	5.87764e+06	7204554	5795842	6.48245e+06	6459593	5745489	10392577	3.09918	1.63189	0.00179582
Isopropyl propionate	C6H12O2	2.28737e+06	1.12185e+06	2.00102e+06	1.85176e+06	2.33975e+06	2.17494e+06	1.74504e+06	5.44662e+06	7.91373e+06	5.87764e+06	7204554	5795842	6.48245e+06	6459593	5745489	10392577	3.09918	1.63189	0.00179582
2-methyl valeric acid	C6H12O2	2.28737e+06	1.12185e+06	2.00102e+06	1.85176e+06	2.33975e+06	2.17494e+06	1.74504e+06	5.44662e+06	7.91373e+06	5.87764e+06	7204554	5795842	6.48245e+06	6459593	5745489	10392577	3.09918	1.63189	0.00179582
ethyl 2-methyl-propionyl	C6H12O2	2.28737e+06	1.12185e+06	2.00102e+06	1.85176e+06	2.33975e+06	2.17494e+06	1.74504e+06	5.44662e+06	7.91373e+06	5.87764e+06	7204554	5795842	6.48245e+06	6459593	5745489	10392577	3.09918	1.63189	0.00179582
2-Methylpropyl acetate	C6H12O2	2.28737e+06	1.12185e+06	2.00102e+06	1.85176e+06	2.33975e+06	2.17494e+06	1.74504e+06	5.44662e+06	7.91373e+06	5.87764e+06	7204554	5795842	6.48245e+06	6459593	5745489	10392577	3.09918	1.63189	0.00179582
Methyl pentanoate	C6H12O2	2.28737e+06	1.12185e+06	2.00102e+06	1.85176e+06	2.33975e+06	2.17494e+06	1.74504e+06	5.44662e+06	7.91373e+06	5.87764e+06	7204554	5795842	6.48245e+06	6459593	5745489	10392577	3.09918	1.63189	0.00179582
diethyl acetic acid	C6H12O2	2.28737e+06	1.12185e+06	2.00102e+06	1.85176e+06	2.33975e+06	2.17494e+06	1.74504e+06	5.44662e+06	7.91373e+06	5.87764e+06	7204554	5795842	6.48245e+06	6459593	5745489	10392577	3.09918	1.63189	0.00179582
n-Butyl acetate	C6H12O2	2.28737e+06	1.12185e+06	2.00102e+06	1.85176e+06	2.33975e+06	2.17494e+06	1.74504e+06	5.44662e+06	7.91373e+06	5.87764e+06	7204554	5795842	6.48245e+06	6459593	5745489	10392577	3.09918	1.63189	0.00179582
4-Hydroxy-4-methylpentan-2-one	C6H12O2	2.28737e+06	1.12185e+06	2.00102e+06	1.85176e+06	2.33975e+06	2.17494e+06	1.74504e+06	5.44662e+06	7.91373e+06	5.87764e+06	7204554	5795842	6.48245e+06	6459593	5745489	10392577	3.09918	1.63189	0.00179582
2,2,4-Trimethyl-1,3-dioxolane	C6H12O2	2.28737e+06	1.12185e+06	2.00102e+06	1.85176e+06	2.33975e+06	2.17494e+06	1.74504e+06	5.44662e+06	7.91373e+06	5.87764e+06	7204554	5795842	6.48245e+06	6459593	5745489	10392577	3.09918	1.63189	0.00179582
cis-1,2-Cyclohexanediol	C6H12O2	2.28737e+06	1.12185e+06	2.00102e+06	1.85176e+06	2.33975e+06	2.17494e+06	1.74504e+06	5.44662e+06	7.91373e+06	5.87764e+06	7204554	5795842	6.48245e+06	6459593	5745489	10392577	3.09918	1.63189	0.00179582
4-Hydroxyhexan-3-one	C6H12O2	2.28737e+06	1.12185e+06	2.00102e+06	1.85176e+06	2.33975e+06	2.17494e+06	1.74504e+06	5.44662e+06	7.91373e+06	5.87764e+06	7204554	5795842	6.48245e+06	6459593	5745489	10392577	3.09918	1.63189	0.00179582
trans-1,2-Cyclohexanediol	C6H12O2	2.28737e+06	1.12185e+06	2.00102e+06	1.85176e+06	2.33975e+06	2.17494e+06	1.74504e+06	5.44662e+06	7.91373e+06	5.87764e+06	7204554	5795842	6.48245e+06	6459593	5745489	10392577	3.09918	1.63189	0.00179582
3-Hydroxyhexanal	C6H12O2	2.28737e+06	1.12185e+06	2.00102e+06	1.85176e+06	2.33975e+06	2.17494e+06	1.74504e+06	5.44662e+06	7.91373e+06	5.87764e+06	7204554	5795842	6.48245e+06	6459593	5745489	10392577	3.09918	1.63189	0.00179582
3,3-dimethyl-butanoic acid	C6H12O2	2.28737e+06	1.12185e+06	2.00102e+06	1.85176e+06	2.33975e+06	2.17494e+06	1.74504e+06	5.44662e+06	7.91373e+06	5.87764e+06	7204554	5795842	6.48245e+06	6459593	5745489	10392577	3.09918	1.63189	0.00179582
dimethyl ethyl acetic acid	C6H12O2	2.28737e+06	1.12185e+06	2.00102e+06	1.85176e+06	2.33975e+06	2.17494e+06	1.74504e+06	5.44662e+06	7.91373e+06	5.87764e+06	7204554	5795842	6.48245e+06	6459593	5745489	10392577	3.09918	1.63189	0.00179582
2-hydroxy caproaldehyde	C6H12O2	2.28737e+06	1.12185e+06	2.00102e+06	1.85176e+06	2.33975e+06	2.17494e+06	1.74504e+06	5.44662e+06	7.91373e+06	5.87764e+06	7204554	5795842	6.48245e+06	6459593	5745489	10392577	3.09918	1.63189	0.00179582
4-hydroxy caproaldehyde	C6H12O2	2.28737e+06	1.12185e+06	2.00102e+06	1.85176e+06	2.33975e+06	2.17494e+06	1.74504e+06	5.44662e+06	7.91373e+06	5.87764e+06	7204554	5795842	6.48245e+06	6459593	5745489	10392577	3.09918	1.63189	0.00179582
5-hydroxy caproaldehyde	C6H12O2	2.28737e+06	1.12185e+06	2.00102e+06	1.85176e+06	2.33975e+06	2.17494e+06	1.74504e+06	5.44662e+06	7.91373e+06	5.87764e+06	7204554	5795842	6.48245e+06	6459593	5745489	10392577	3.09918	1.63189	0.00179582
6-hydroxy caproaldehyde	C6H12O2	2.28737e+06	1.12185e+06	2.00102e+06	1.85176e+06	2.33975e+06	2.17494e+06	1.74504e+06	5.44662e+06	7.91373e+06	5.87764e+06	7204554	5795842	6.48245e+06	6459593	5745489	10392577	3.09918	1.63189	0.00179582
2S-Hydroxyhexan-3-one	C6H12O2	2.28737e+06	1.12185e+06	2.00102e+06	1.85176e+06	2.33975e+06	2.17494e+06	1.74504e+06	5.44662e+06	7.91373e+06	5.87764e+06	7204554	5795842	6.48245e+06	6459593	5745489	10392577	3.09918	1.63189	0.00179582
3R-Hydroxyhexan-2-one	C6H12O2	2.28737e+06	1.12185e+06	2.00102e+06	1.85176e+06	2.33975e+06	2.17494e+06	1.74504e+06	5.44662e+06	7.91373e+06	5.87764e+06	7204554	5795842	6.48245e+06	6459593	5745489	10392577	3.09918	1.63189	0.00179582
3S-Hydroxyhexan-2-one	C6H12O2	2.28737e+06	1.12185e+06	2.00102e+06	1.85176e+06	2.33975e+06	2.17494e+06	1.74504e+06	5.44662e+06	7.91373e+06	5.87764e+06	7204554	5795842	6.48245e+06	6459593	5745489	10392577	3.09918	1.63189	0.00179582
2-Hydroxyhexan-3-one	C6H12O2	2.28737e+06	1.12185e+06	2.00102e+06	1.85176e+06	2.33975e+06	2.17494e+06	1.74504e+06	5.44662e+06	7.91373e+06	5.87764e+06	7204554	5795842	6.48245e+06	6459593	5745489	10392577	3.09918	1.63189	0.00179582
Glycerol	C3H8O3	2.50993e+06	1.75928e+06	2161239	2.15284e+06	2.23709e+06	2.26175e+06	1.72184e+06	7688173	7373391	7.98706e+06	9941447	7.90121e+06	7877794	7.44711e+06	7.75696e+06	8.27432e+06	3.5875	1.84298	0.00412013
2-Methylpropyl propionate	C7H14O2	1.91416e+06	936736	1.58099e+06	1.48376e+06	1.76527e+06	1.55873e+06	1486326	2.97911e+06	3.76638e+06	3.08155e+06	3.47959e+06	2.93806e+06	3246738	3.10163e+06	3.22216e+06	5204512	2.06035	1.04289	0.00412013
Heptanoic acid	C7H14O2	1.91416e+06	936736	1.58099e+06	1.48376e+06	1.76527e+06	1.55873e+06	1486326	2.97911e+06	3.76638e+06	3.08155e+06	3.47959e+06	2.93806e+06	3246738	3.10163e+06	3.22216e+06	5204512	2.06035	1.04289	0.00412013
2-Methylbutyl acetate	C7H14O2	1.91416e+06	936736	1.58099e+06	1.48376e+06	1.76527e+06	1.55873e+06	1486326	2.97911e+06	3.76638e+06	3.08155e+06	3.47959e+06	2.93806e+06	3246738	3.10163e+06	3.22216e+06	5204512	2.06035	1.04289	0.00412013
Isopropyl 2-methylpropanoate	C7H14O2	1.91416e+06	936736	1.58099e+06	1.48376e+06	1.76527e+06	1.55873e+06	1486326	2.97911e+06	3.76638e+06	3.08155e+06	3.47959e+06	2.93806e+06	3246738	3.10163e+06	3.22216e+06	5204512	2.06035	1.04289	0.00412013
ethyl 2-methyl-butanoate	C7H14O2	1.91416e+06	936736	1.58099e+06	1.48376e+06	1.76527e+06	1.55873e+06	1486326	2.97911e+06	3.76638e+06	3.08155e+06	3.47959e+06	2.93806e+06	3246738	3.10163e+06	3.22216e+06	5204512	2.06035	1.04289	0.00412013
Methyl hexanoate	C7H14O2	1.91416e+06	936736	1.58099e+06	1.48376e+06	1.76527e+06	1.55873e+06	1486326	2.97911e+06	3.76638e+06	3.08155e+06	3.47959e+06	2.93806e+06	3246738	3.10163e+06	3.22216e+06	5204512	2.06035	1.04289	0.00412013
propionyl butyrate	C7H14O2	1.91416e+06	936736	1.58099e+06	1.48376e+06	1.76527e+06	1.55873e+06	1486326	2.97911e+06	3.76638e+06	3.08155e+06	3.47959e+06	2.93806e+06	3246738	3.10163e+06	3.22216e+06	5204512	2.06035	1.04289	0.00412013
Isopropyl butyrate	C7H14O2	1.91416e+06	936736	1.58099e+06	1.48376e+06	1.76527e+06	1.55873e+06	1486326	2.97911e+06	3.76638e+06	3.08155e+06	3.47959e+06	2.93806e+06	3246738	3.10163e+06	3.22216e+06	5204512	2.06035	1.04289	0.00412013
Pentyl acetate	C7H14O2	1.91416e+06	936736	1.58099e+06	1.48376e+06	1.76527e+06	1.55873e+06	1486326	2.97911e+06	3.76638e+06	3.08155e+06	3.47959e+06	2.93806e+06	3246738	3.10163e+06	3.22216e+06	5204512	2.06035	1.04289	0.00412013
Ethyl pentanoate	C7H14O2	1.91416e+06	936736	1.58099e+06	1.48376e+06	1.76527e+06	1.55873e+06	1486326	2.97911e+06	3.76638e+06	3.08155e+06	3.47959e+06	2.93806e+06	3246738	3.10163e+06	3.22216e+06	5204512	2.06035	1.04289	0.00412013
ethyl 3-methyl-butanoate	C7H14O2	1.91416e+06	936736	1.58099e+06	1.48376e+06	1.76527e+06	1.55873e+06	1486326	2.97911e+06	3.76638e+06	3.08155e+06	3.47959e+06	2.93806e+06	3246738	3.10163e+06	3.22216e+06	5204512	2.06035	1.04289	0.00412013
Butyl propionate	C7H14O2	1.91416e+06	936736	1.58099e+06	1.48376e+06	1.76527e+06	1.55873e+06	1486326	2.97911e+06	3.76638e+06	3.08155e+06	3.47959e+06	2.93806e+06	3246738	3.10163e+06	3.22216e+06	5204512	2.06035	1.04289	0.00412013
cis- and trans-2-Isopropyl-4-methyl-1,3-dioxolane	C7H14O2	1.91416e+06	936736	1.58099e+06	1.48376e+06	1.76527e+06	1.55873e+06	1486326	2.97911e+06	3.76638e+06	3.08155e+06	3.47959e+06	2.93806e+06	3246738	3.10163e+06	3.22216e+06	5204512	2.06035	1.04289	0.00412013
Propyl 2-methylpropanoate	C7H14O2	1.91416e+06	936736	1.58099e+06	1.48376e+06	1.76527e+06	1.55873e+06	1486326	2.97911e+06	3.76638e+06	3.08155e+06	3.47959e+06	2.93806e+06	3246738	3.10163e+06	3.22216e+06	5204512	2.06035	1.04289	0.00412013
Methyl 4-methylpentanoate	C7H14O2	1.91416e+06	936736	1.58099e+06	1.48376e+06	1.76527e+06	1.55873e+06	1486326	2.97911e+06	3.76638e+06	3.08155e+06	3.47959e+06	2.93806e+06	3246738	3.10163e+06	3.22216e+06	5204512	2.06035	1.04289	0.00412013
Methyl (±)-2-methylpentanoate	C7H14O2	1.91416e+06	936736	1.58099e+06	1.48376e+06	1.76527e+06	1.55873e+06	1486326	2.97911e+06	3.76638e+06	3.08155e+06	3.47959e+06	2.93806e+06	3246738	3.10163e+06	3.22216e+06	5204512	2.06035	1.04289	0.00412013
(±)-2-Pentanol acetate	C7H14O2	1.91416e+06	936736	1.58099e+06	1.48376e+06	1.76527e+06	1.55873e+06	1486326	2.97911e+06	3.76638e+06	3.08155e+06	3.47959e+06	2.93806e+06	3246738	3.10163e+06	3.22216e+06	5204512	2.06035	1.04289	0.00412013
2-Methylhexanoic acid	C7H14O2	1.91416e+06	936736	1.58099e+06	1.48376e+06	1.76527e+06	1.55873e+06	1486326	2.97911e+06	3.76638e+06	3.08155e+06	3.47959e+06	2.93806e+06	3246738	3.10163e+06	3.22216e+06	5204512	2.06035	1.04289	0.00412013
5-methyl-hexanoic acid	C7H14O2	1.91416e+06	936736	1.58099e+06	1.48376e+06	1.76527e+06	1.55873e+06	1486326	2.97911e+06	3.76638e+06	3.08155e+06	3.47959e+06	2.93806e+06	3246738	3.10163e+06	3.22216e+06	5204512	2.06035	1.04289	0.00412013
Isoamyl acetate	C7H14O2	1.91416e+06	936736	1.58099e+06	1.48376e+06	1.76527e+06	1.55873e+06	1486326	2.97911e+06	3.76638e+06	3.08155e+06	3.47959e+06	2.93806e+06	3246738	3.10163e+06	3.22216e+06	5204512	2.06035	1.04289	0.00412013
Hexyl formate	C7H14O2	1.91416e+06	936736	1.58099e+06	1.48376e+06	1.76527e+06	1.55873e+06	1486326	2.97911e+06	3.76638e+06	3.08155e+06	3.47959e+06	2.93806e+06	3246738	3.10163e+06	3.22216e+06	5204512	2.06035	1.04289	0.00412013
beta,beta-dimethyl valeric acid	C7H14O2	1.91416e+06	936736	1.58099e+06	1.48376e+06	1.76527e+06	1.55873e+06	1486326	2.97911e+06	3.76638e+06	3.08155e+06	3.47959e+06	2.93806e+06	3246738	3.10163e+06	3.22216e+06	5204512	2.06035	1.04289	0.00412013
alpha,alpha-dimethyl valeric acid	C7H14O2	1.91416e+06	936736	1.58099e+06	1.48376e+06	1.76527e+06	1.55873e+06	1486326	2.97911e+06	3.76638e+06	3.08155e+06	3.47959e+06	2.93806e+06	3246738	3.10163e+06	3.22216e+06	5204512	2.06035	1.04289	0.00412013
4-methyl-hexanoic acid	C7H14O2	1.91416e+06	936736	1.58099e+06	1.48376e+06	1.76527e+06	1.55873e+06	1486326	2.97911e+06	3.76638e+06	3.08155e+06	3.47959e+06	2.93806e+06	3246738	3.10163e+06	3.22216e+06	5204512	2.06035	1.04289	0.00412013
3-methyl-hexanoic acid	C7H14O2	1.91416e+06	936736	1.58099e+06	1.48376e+06	1.76527e+06	1.55873e+06	1486326	2.97911e+06	3.76638e+06	3.08155e+06	3.47959e+06	2.93806e+06	3246738	3.10163e+06	3.22216e+06	5204512	2.06035	1.04289	0.00412013
alpha-ethyl valeric acid	C7H14O2	1.91416e+06	936736	1.58099e+06	1.48376e+06	1.76527e+06	1.55873e+06	1486326	2.97911e+06	3.76638e+06	3.08155e+06	3.47959e+06	2.93806e+06	3246738	3.10163e+06	3.22216e+06	5204512	2.06035	1.04289	0.00412013
3-Hydroxyheptan-2-one	C7H14O2	1.91416e+06	936736	1.58099e+06	1.48376e+06	1.76527e+06	1.55873e+06	1486326	2.97911e+06	3.76638e+06	3.08155e+06	3.47959e+06	2.93806e+06	3246738	3.10163e+06	3.22216e+06	5204512	2.06035	1.04289	0.00412013
2-hydroxy-Heptan-3-one	C7H14O2	1.91416e+06	936736	1.58099e+06	1.48376e+06	1.76527e+06	1.55873e+06	1486326	2.97911e+06	3.76638e+06	3.08155e+06	3.47959e+06	2.93806e+06	3246738	3.10163e+06	3.22216e+06	5204512	2.06035	1.04289	0.00412013
3,4-dimethyl valeric acid	C7H14O2	1.91416e+06	936736	1.58099e+06	1.48376e+06	1.76527e+06	1.55873e+06	1486326	2.97911e+06	3.76638e+06	3.08155e+06	3.47959e+06	2.93806e+06	3246738	3.10163e+06	3.22216e+06	5204512	2.06035	1.04289	0.00412013
4,4-dimethyl valeric acid	C7H14O2	1.91416e+06	936736	1.58099e+06	1.48376e+06	1.76527e+06	1.55873e+06	1486326	2.97911e+06	3.76638e+06	3.08155e+06	3.47959e+06	2.93806e+06	3246738	3.10163e+06	3.22216e+06	5204512	2.06035	1.04289	0.00412013
2-ethyl-2-methyl-butanoic acid	C7H14O2	1.91416e+06	936736	1.58099e+06	1.48376e+06	1.76527e+06	1.55873e+06	1486326	2.97911e+06	3.76638e+06	3.08155e+06	3.47959e+06	2.93806e+06	3246738	3.10163e+06	3.22216e+06	5204512	2.06035	1.04289	0.00412013
Cis,cis-2-amino-3-(3-oxoprop-1-enyl)but-2-enedioate	C7H5NO5	34406.3	18325.1	31077.6	59590.5	89180.2	18828.8	43075.6	45293.5	109665	92130.9	65813.9	84680.3	62830.9	59935.2	109606	76496.8	2.08019	1.05671	0.0221317
5-Nitrosalicylate	C7H5NO5	34406.3	18325.1	31077.6	59590.5	89180.2	18828.8	43075.6	45293.5	109665	92130.9	65813.9	84680.3	62830.9	59935.2	109606	76496.8	2.08019	1.05671	0.0221317
1,2,3-Tris(1-ethoxyethoxy)propane	C15H32O6	656266	937814	1.07456e+06	912365	1.1872e+06	873493	644047	304453	167849	80754.8	318155	57327.2	28140.4	78053.7	58590.8	212227	0.0889256	-3.49126	0.00412013
Acetyl tributyl citrate	C20H34O8	385347	584660	535100	501750	788428	339755	182420	261269	319863	0	112583	54388.8	28093.4	250047	34504.8	177478	0.188223	-2.40948	0.0170125
5S-HETE di-endoperoxide	C20H34O8	385347	584660	535100	501750	788428	339755	182420	261269	319863	0	112583	54388.8	28093.4	250047	34504.8	177478	0.188223	-2.40948	0.0170125
4,5-Dihydrovomifoliol	C13H22O3	158089	113679	203092	186594	206150	198779	164319	83031.1	106470	75973.7	69045.5	63445.4	75709.4	68482	87996.8	79282.1	0.432253	-1.21005	0.00841906
Methyl dihydrojasmonate	C13H22O3	158089	113679	203092	186594	206150	198779	164319	83031.1	106470	75973.7	69045.5	63445.4	75709.4	68482	87996.8	79282.1	0.432253	-1.21005	0.00841906
Riesling acetal	C13H22O3	158089	113679	203092	186594	206150	198779	164319	83031.1	106470	75973.7	69045.5	63445.4	75709.4	68482	87996.8	79282.1	0.432253	-1.21005	0.00841906
Artemether	C16H26O5	321056	211372	272010	201838	352972	334167	369157	62478.9	70005.2	89397.4	49654.6	43179	35897.9	40094.6	48817.6	104516	0.166039	-2.5904	0.00735225
Tetranor-PGE1	C16H26O5	321056	211372	272010	201838	352972	334167	369157	62478.9	70005.2	89397.4	49654.6	43179	35897.9	40094.6	48817.6	104516	0.166039	-2.5904	0.00735225
Tetranor-PGD1	C16H26O5	321056	211372	272010	201838	352972	334167	369157	62478.9	70005.2	89397.4	49654.6	43179	35897.9	40094.6	48817.6	104516	0.166039	-2.5904	0.00735225
Valdiate	C17H26O5	150802	196452	204972	132813	157488	172216	172284	0	0	40807.8	44760.8	28311.7	26943.2	22484.1	50995.5	50819.5	0.209641	-2.25401	0.0131165
3-Hydroxy-6,8-dimethoxy-7(11)-eremophilen-12,8-olide	C17H26O5	150802	196452	204972	132813	157488	172216	172284	0	0	40807.8	44760.8	28311.7	26943.2	22484.1	50995.5	50819.5	0.209641	-2.25401	0.0131165
Botrydial	C17H26O5	150802	196452	204972	132813	157488	172216	172284	0	0	40807.8	44760.8	28311.7	26943.2	22484.1	50995.5	50819.5	0.209641	-2.25401	0.0131165
methyl 8-[2-(2-formyl-vinyl)-3-hydroxy-5-oxo-cyclopentyl]-octanoate	C17H26O5	150802	196452	204972	132813	157488	172216	172284	0	0	40807.8	44760.8	28311.7	26943.2	22484.1	50995.5	50819.5	0.209641	-2.25401	0.0131165
Hydroxyvalerylcarnitine	C12H25NO5	48135.1	69599.6	55128.2	66379.4	70640.9	77889.9	108769	37440.3	24858.6	26234.7	26342.1	32247.5	36389.8	24489.9	23895.9	31336.6	0.386654	-1.37089	0.0138856
O-glutaroyl-L-carnitine	C12H21NO6	52010.9	75799.9	71936.7	46465.2	50083.7	37181	59813.2	16415.4	13465.3	19821.2	17768.8	20975.5	21264.1	12344.6	24438.9	18288.7	0.37328	-1.42167	0.0161657
Glutarylcarnitine	C12H21NO6	52010.9	75799.9	71936.7	46465.2	50083.7	37181	59813.2	16415.4	13465.3	19821.2	17768.8	20975.5	21264.1	12344.6	24438.9	18288.7	0.37328	-1.42167	0.0161657
2-Hexenoylcarnitine	C13H23NO4	146480	56724.3	113985	78337.7	74557	111053	137049	28462.1	38567	21817.8	30056.3	19832.3	23781.4	34267.7	31211.9	30783.3	0.321239	-1.63828	0.0242254
2-decylenic acid	C10H18O2	407043	323168	416666	333202	431254	339426	338844	164164	164024	125802	159054	118354	165777	133238	112594	182685	0.430938	-1.21445	0.00412013
3-Methyl-2,4-nonanedione	C10H18O2	407043	323168	416666	333202	431254	339426	338844	164164	164024	125802	159054	118354	165777	133238	112594	182685	0.430938	-1.21445	0.00412013
Cyclohexyl butanoate	C10H18O2	407043	323168	416666	333202	431254	339426	338844	164164	164024	125802	159054	118354	165777	133238	112594	182685	0.430938	-1.21445	0.00412013
(E)-2-Hexenyl butyrate	C10H18O2	407043	323168	416666	333202	431254	339426	338844	164164	164024	125802	159054	118354	165777	133238	112594	182685	0.430938	-1.21445	0.00412013
9-Hydroxygeraniol	C10H18O2	407043	323168	416666	333202	431254	339426	338844	164164	164024	125802	159054	118354	165777	133238	112594	182685	0.430938	-1.21445	0.00412013
4Z-decenoic acid	C10H18O2	407043	323168	416666	333202	431254	339426	338844	164164	164024	125802	159054	118354	165777	133238	112594	182685	0.430938	-1.21445	0.00412013
9-Decenoic acid	C10H18O2	407043	323168	416666	333202	431254	339426	338844	164164	164024	125802	159054	118354	165777	133238	112594	182685	0.430938	-1.21445	0.00412013
3Z-decenoic acid	C10H18O2	407043	323168	416666	333202	431254	339426	338844	164164	164024	125802	159054	118354	165777	133238	112594	182685	0.430938	-1.21445	0.00412013
6-endo-hydroxycineole	C10H18O2	407043	323168	416666	333202	431254	339426	338844	164164	164024	125802	159054	118354	165777	133238	112594	182685	0.430938	-1.21445	0.00412013
Linalyl oxide	C10H18O2	407043	323168	416666	333202	431254	339426	338844	164164	164024	125802	159054	118354	165777	133238	112594	182685	0.430938	-1.21445	0.00412013
(E)-3-(Tetrahydro-5,5-dimethyl-2-furanyl)-2-buten-1-ol	C10H18O2	407043	323168	416666	333202	431254	339426	338844	164164	164024	125802	159054	118354	165777	133238	112594	182685	0.430938	-1.21445	0.00412013
Citronellic acid	C10H18O2	407043	323168	416666	333202	431254	339426	338844	164164	164024	125802	159054	118354	165777	133238	112594	182685	0.430938	-1.21445	0.00412013
2-exo-Hydroxy-1,8-cineole	C10H18O2	407043	323168	416666	333202	431254	339426	338844	164164	164024	125802	159054	118354	165777	133238	112594	182685	0.430938	-1.21445	0.00412013
(S,E)-2,6-Dimethyl-5,7-octadiene-2,3-diol	C10H18O2	407043	323168	416666	333202	431254	339426	338844	164164	164024	125802	159054	118354	165777	133238	112594	182685	0.430938	-1.21445	0.00412013
Cnidiol C	C10H18O2	407043	323168	416666	333202	431254	339426	338844	164164	164024	125802	159054	118354	165777	133238	112594	182685	0.430938	-1.21445	0.00412013
Isopentyl 3-methyl-2-butenoate	C10H18O2	407043	323168	416666	333202	431254	339426	338844	164164	164024	125802	159054	118354	165777	133238	112594	182685	0.430938	-1.21445	0.00412013
5-Decenoic acid	C10H18O2	407043	323168	416666	333202	431254	339426	338844	164164	164024	125802	159054	118354	165777	133238	112594	182685	0.430938	-1.21445	0.00412013
(±)-cis-Linalyl oxide	C10H18O2	407043	323168	416666	333202	431254	339426	338844	164164	164024	125802	159054	118354	165777	133238	112594	182685	0.430938	-1.21445	0.00412013
(±)-trans-Linalyl oxide	C10H18O2	407043	323168	416666	333202	431254	339426	338844	164164	164024	125802	159054	118354	165777	133238	112594	182685	0.430938	-1.21445	0.00412013
Ethyl 4Z-octenoate	C10H18O2	407043	323168	416666	333202	431254	339426	338844	164164	164024	125802	159054	118354	165777	133238	112594	182685	0.430938	-1.21445	0.00412013
(+)-6-Hydroxy-2,6-dimethyl-7-octen-4-one	C10H18O2	407043	323168	416666	333202	431254	339426	338844	164164	164024	125802	159054	118354	165777	133238	112594	182685	0.430938	-1.21445	0.00412013
Methyl (xi)-3-nonenoate	C10H18O2	407043	323168	416666	333202	431254	339426	338844	164164	164024	125802	159054	118354	165777	133238	112594	182685	0.430938	-1.21445	0.00412013
3Z-Hexenyl isobutyrate	C10H18O2	407043	323168	416666	333202	431254	339426	338844	164164	164024	125802	159054	118354	165777	133238	112594	182685	0.430938	-1.21445	0.00412013
2-Propenyl heptanoate	C10H18O2	407043	323168	416666	333202	431254	339426	338844	164164	164024	125802	159054	118354	165777	133238	112594	182685	0.430938	-1.21445	0.00412013
Methyl 2-nonenoate	C10H18O2	407043	323168	416666	333202	431254	339426	338844	164164	164024	125802	159054	118354	165777	133238	112594	182685	0.430938	-1.21445	0.00412013
Menthone lactone	C10H18O2	407043	323168	416666	333202	431254	339426	338844	164164	164024	125802	159054	118354	165777	133238	112594	182685	0.430938	-1.21445	0.00412013
5Z-Octenyl acetate	C10H18O2	407043	323168	416666	333202	431254	339426	338844	164164	164024	125802	159054	118354	165777	133238	112594	182685	0.430938	-1.21445	0.00412013
(±)-6-Methyl-5-hepten-2-yl acetate	C10H18O2	407043	323168	416666	333202	431254	339426	338844	164164	164024	125802	159054	118354	165777	133238	112594	182685	0.430938	-1.21445	0.00412013
4-Hydroxy-2,6-dimethyl-7-octen-3-one	C10H18O2	407043	323168	416666	333202	431254	339426	338844	164164	164024	125802	159054	118354	165777	133238	112594	182685	0.430938	-1.21445	0.00412013
ethyl 3E-octenoate	C10H18O2	407043	323168	416666	333202	431254	339426	338844	164164	164024	125802	159054	118354	165777	133238	112594	182685	0.430938	-1.21445	0.00412013
2-Methylbutyl 3-methyl-2-butenoate	C10H18O2	407043	323168	416666	333202	431254	339426	338844	164164	164024	125802	159054	118354	165777	133238	112594	182685	0.430938	-1.21445	0.00412013
2,6-Dimethyl-3,7-octadiene-2,6-diol	C10H18O2	407043	323168	416666	333202	431254	339426	338844	164164	164024	125802	159054	118354	165777	133238	112594	182685	0.430938	-1.21445	0.00412013
1-Cyclopropyl-4-methyl-1,3-cyclohexanediol	C10H18O2	407043	323168	416666	333202	431254	339426	338844	164164	164024	125802	159054	118354	165777	133238	112594	182685	0.430938	-1.21445	0.00412013
Lilac alcohol	C10H18O2	407043	323168	416666	333202	431254	339426	338844	164164	164024	125802	159054	118354	165777	133238	112594	182685	0.430938	-1.21445	0.00412013
8-Methylnonenoate	C10H18O2	407043	323168	416666	333202	431254	339426	338844	164164	164024	125802	159054	118354	165777	133238	112594	182685	0.430938	-1.21445	0.00412013
Hexyl crotonate	C10H18O2	407043	323168	416666	333202	431254	339426	338844	164164	164024	125802	159054	118354	165777	133238	112594	182685	0.430938	-1.21445	0.00412013
Linalool oxide III	C10H18O2	407043	323168	416666	333202	431254	339426	338844	164164	164024	125802	159054	118354	165777	133238	112594	182685	0.430938	-1.21445	0.00412013
6-Decenoic acid	C10H18O2	407043	323168	416666	333202	431254	339426	338844	164164	164024	125802	159054	118354	165777	133238	112594	182685	0.430938	-1.21445	0.00412013
2-Octenyl acetate	C10H18O2	407043	323168	416666	333202	431254	339426	338844	164164	164024	125802	159054	118354	165777	133238	112594	182685	0.430938	-1.21445	0.00412013
Cyclohexylethyl acetate	C10H18O2	407043	323168	416666	333202	431254	339426	338844	164164	164024	125802	159054	118354	165777	133238	112594	182685	0.430938	-1.21445	0.00412013
Linalool oxide (trans-pyranoid)	C10H18O2	407043	323168	416666	333202	431254	339426	338844	164164	164024	125802	159054	118354	165777	133238	112594	182685	0.430938	-1.21445	0.00412013
3Z-Hexenyl butyrate	C10H18O2	407043	323168	416666	333202	431254	339426	338844	164164	164024	125802	159054	118354	165777	133238	112594	182685	0.430938	-1.21445	0.00412013
6-Decanolide	C10H18O2	407043	323168	416666	333202	431254	339426	338844	164164	164024	125802	159054	118354	165777	133238	112594	182685	0.430938	-1.21445	0.00412013
Ethyl (E)-2-octenoate	C10H18O2	407043	323168	416666	333202	431254	339426	338844	164164	164024	125802	159054	118354	165777	133238	112594	182685	0.430938	-1.21445	0.00412013
xi-Tetrahydro-3-pentyl-2H-pyran-2-one	C10H18O2	407043	323168	416666	333202	431254	339426	338844	164164	164024	125802	159054	118354	165777	133238	112594	182685	0.430938	-1.21445	0.00412013
trans-p-Menth-2-ene-1,4-diol	C10H18O2	407043	323168	416666	333202	431254	339426	338844	164164	164024	125802	159054	118354	165777	133238	112594	182685	0.430938	-1.21445	0.00412013
Delta-decalactone	C10H18O2	407043	323168	416666	333202	431254	339426	338844	164164	164024	125802	159054	118354	165777	133238	112594	182685	0.430938	-1.21445	0.00412013
xi-5-Hexyldihydro-2(3H)-furanone	C10H18O2	407043	323168	416666	333202	431254	339426	338844	164164	164024	125802	159054	118354	165777	133238	112594	182685	0.430938	-1.21445	0.00412013
1-Octen-3-yl acetate	C10H18O2	407043	323168	416666	333202	431254	339426	338844	164164	164024	125802	159054	118354	165777	133238	112594	182685	0.430938	-1.21445	0.00412013
p-Menth-8-ene-1,2-diol	C10H18O2	407043	323168	416666	333202	431254	339426	338844	164164	164024	125802	159054	118354	165777	133238	112594	182685	0.430938	-1.21445	0.00412013
(4R,7S)-7-isopropyl-4-methyloxepan-2-one	C10H18O2	407043	323168	416666	333202	431254	339426	338844	164164	164024	125802	159054	118354	165777	133238	112594	182685	0.430938	-1.21445	0.00412013
(1R,2R,4S)-Limonene-1,2-diol	C10H18O2	407043	323168	416666	333202	431254	339426	338844	164164	164024	125802	159054	118354	165777	133238	112594	182685	0.430938	-1.21445	0.00412013
Limonene-1,2-diol	C10H18O2	407043	323168	416666	333202	431254	339426	338844	164164	164024	125802	159054	118354	165777	133238	112594	182685	0.430938	-1.21445	0.00412013
(+)-Neomatatabiol	C10H18O2	407043	323168	416666	333202	431254	339426	338844	164164	164024	125802	159054	118354	165777	133238	112594	182685	0.430938	-1.21445	0.00412013
6-endo-Hydroxycineole	C10H18O2	407043	323168	416666	333202	431254	339426	338844	164164	164024	125802	159054	118354	165777	133238	112594	182685	0.430938	-1.21445	0.00412013
2,6-dimethyl-2E,7-octadiene-1,6-diol	C10H18O2	407043	323168	416666	333202	431254	339426	338844	164164	164024	125802	159054	118354	165777	133238	112594	182685	0.430938	-1.21445	0.00412013
(6E)-8-Hydroxygeraniol	C10H18O2	407043	323168	416666	333202	431254	339426	338844	164164	164024	125802	159054	118354	165777	133238	112594	182685	0.430938	-1.21445	0.00412013
2E-Octenyl acetate	C10H18O2	407043	323168	416666	333202	431254	339426	338844	164164	164024	125802	159054	118354	165777	133238	112594	182685	0.430938	-1.21445	0.00412013
3Z-Octenyl acetate	C10H18O2	407043	323168	416666	333202	431254	339426	338844	164164	164024	125802	159054	118354	165777	133238	112594	182685	0.430938	-1.21445	0.00412013
formyl 6E-nonenoate	C10H18O2	407043	323168	416666	333202	431254	339426	338844	164164	164024	125802	159054	118354	165777	133238	112594	182685	0.430938	-1.21445	0.00412013
ethyl 4Z-octenoate	C10H18O2	407043	323168	416666	333202	431254	339426	338844	164164	164024	125802	159054	118354	165777	133238	112594	182685	0.430938	-1.21445	0.00412013
1,7-Dioxaspiro[5.6]dodecane	C10H18O2	407043	323168	416666	333202	431254	339426	338844	164164	164024	125802	159054	118354	165777	133238	112594	182685	0.430938	-1.21445	0.00412013
2-Methyl-1,7-dioxaspiro[5.5]undecane	C10H18O2	407043	323168	416666	333202	431254	339426	338844	164164	164024	125802	159054	118354	165777	133238	112594	182685	0.430938	-1.21445	0.00412013
(4R,7R)-7-isopropyl-4-methyloxepan-2-one	C10H18O2	407043	323168	416666	333202	431254	339426	338844	164164	164024	125802	159054	118354	165777	133238	112594	182685	0.430938	-1.21445	0.00412013
10-Methyloxecan-2-one	C10H18O2	407043	323168	416666	333202	431254	339426	338844	164164	164024	125802	159054	118354	165777	133238	112594	182685	0.430938	-1.21445	0.00412013
(R)-gamma-Decalactone	C10H18O2	407043	323168	416666	333202	431254	339426	338844	164164	164024	125802	159054	118354	165777	133238	112594	182685	0.430938	-1.21445	0.00412013
2,3-Decanedione	C10H18O2	407043	323168	416666	333202	431254	339426	338844	164164	164024	125802	159054	118354	165777	133238	112594	182685	0.430938	-1.21445	0.00412013
cis-dec-2-enoic acid	C10H18O2	407043	323168	416666	333202	431254	339426	338844	164164	164024	125802	159054	118354	165777	133238	112594	182685	0.430938	-1.21445	0.00412013
Isodecenoic acid	C10H18O2	407043	323168	416666	333202	431254	339426	338844	164164	164024	125802	159054	118354	165777	133238	112594	182685	0.430938	-1.21445	0.00412013
Obtusilic acid	C10H18O2	407043	323168	416666	333202	431254	339426	338844	164164	164024	125802	159054	118354	165777	133238	112594	182685	0.430938	-1.21445	0.00412013
3-decylenic acid	C10H18O2	407043	323168	416666	333202	431254	339426	338844	164164	164024	125802	159054	118354	165777	133238	112594	182685	0.430938	-1.21445	0.00412013
3,7-dimethyl-2-octenoic acid	C10H18O2	407043	323168	416666	333202	431254	339426	338844	164164	164024	125802	159054	118354	165777	133238	112594	182685	0.430938	-1.21445	0.00412013
2,7-dimethyl-6-octenoic acid	C10H18O2	407043	323168	416666	333202	431254	339426	338844	164164	164024	125802	159054	118354	165777	133238	112594	182685	0.430938	-1.21445	0.00412013
3-methyl-2-nonenoic acid	C10H18O2	407043	323168	416666	333202	431254	339426	338844	164164	164024	125802	159054	118354	165777	133238	112594	182685	0.430938	-1.21445	0.00412013
D(-)-beta-hydroxy butyric acid	C4H8O3	656266	937814	1.07456e+06	912365	1.1872e+06	873493	644047	304453	167849	80754.8	318155	57327.2	28140.4	78053.7	58590.8	212227	0.0889256	-3.49126	0.0080379
4-Methylnonanoic acid	C10H20O2	9738459	7.43292e+06	9378756	7251482	9339049	8226159	6.97687e+06	2.77864e+06	4037687	3.03965e+06	3.19229e+06	3.27487e+06	3601758	3037485	3146073	7.02995e+06	0.412997	-1.2758	0.0139524
Propyl heptanoate	C10H20O2	9738459	7.43292e+06	9378756	7251482	9339049	8226159	6.97687e+06	2.77864e+06	4037687	3.03965e+06	3.19229e+06	3.27487e+06	3601758	3037485	3146073	7.02995e+06	0.412997	-1.2758	0.0139524
Capric acid	C10H20O2	9738459	7.43292e+06	9378756	7251482	9339049	8226159	6.97687e+06	2.77864e+06	4037687	3.03965e+06	3.19229e+06	3.27487e+06	3601758	3037485	3146073	7.02995e+06	0.412997	-1.2758	0.0139524
Octyl acetate	C10H20O2	9738459	7.43292e+06	9378756	7251482	9339049	8226159	6.97687e+06	2.77864e+06	4037687	3.03965e+06	3.19229e+06	3.27487e+06	3601758	3037485	3146073	7.02995e+06	0.412997	-1.2758	0.0139524
(Z)-1-(1-Ethoxyethoxy)-3-hexene	C10H20O2	9738459	7.43292e+06	9378756	7251482	9339049	8226159	6.97687e+06	2.77864e+06	4037687	3.03965e+06	3.19229e+06	3.27487e+06	3601758	3037485	3146073	7.02995e+06	0.412997	-1.2758	0.0139524
2-Methylbutyl 3-methylbutanoate	C10H20O2	9738459	7.43292e+06	9378756	7251482	9339049	8226159	6.97687e+06	2.77864e+06	4037687	3.03965e+06	3.19229e+06	3.27487e+06	3601758	3037485	3146073	7.02995e+06	0.412997	-1.2758	0.0139524
trans-p-Menthane-1,8-diol	C10H20O2	9738459	7.43292e+06	9378756	7251482	9339049	8226159	6.97687e+06	2.77864e+06	4037687	3.03965e+06	3.19229e+06	3.27487e+06	3601758	3037485	3146073	7.02995e+06	0.412997	-1.2758	0.0139524
(1R,2S,3S,4R)-p-Menthane-2,3-diol	C10H20O2	9738459	7.43292e+06	9378756	7251482	9339049	8226159	6.97687e+06	2.77864e+06	4037687	3.03965e+06	3.19229e+06	3.27487e+06	3601758	3037485	3146073	7.02995e+06	0.412997	-1.2758	0.0139524
3-Methylbutyl pentanoate	C10H20O2	9738459	7.43292e+06	9378756	7251482	9339049	8226159	6.97687e+06	2.77864e+06	4037687	3.03965e+06	3.19229e+06	3.27487e+06	3601758	3037485	3146073	7.02995e+06	0.412997	-1.2758	0.0139524
1,1-Diethoxy-2-hexene	C10H20O2	9738459	7.43292e+06	9378756	7251482	9339049	8226159	6.97687e+06	2.77864e+06	4037687	3.03965e+06	3.19229e+06	3.27487e+06	3601758	3037485	3146073	7.02995e+06	0.412997	-1.2758	0.0139524
butyl hexanoate	C10H20O2	9738459	7.43292e+06	9378756	7251482	9339049	8226159	6.97687e+06	2.77864e+06	4037687	3.03965e+06	3.19229e+06	3.27487e+06	3601758	3037485	3146073	7.02995e+06	0.412997	-1.2758	0.0139524
2-Methylbutyl 2-methylbutanoate	C10H20O2	9738459	7.43292e+06	9378756	7251482	9339049	8226159	6.97687e+06	2.77864e+06	4037687	3.03965e+06	3.19229e+06	3.27487e+06	3601758	3037485	3146073	7.02995e+06	0.412997	-1.2758	0.0139524
Ethyl octanoate	C10H20O2	9738459	7.43292e+06	9378756	7251482	9339049	8226159	6.97687e+06	2.77864e+06	4037687	3.03965e+06	3.19229e+06	3.27487e+06	3601758	3037485	3146073	7.02995e+06	0.412997	-1.2758	0.0139524
3-Methylbutyl 2-methylbutanoate	C10H20O2	9738459	7.43292e+06	9378756	7251482	9339049	8226159	6.97687e+06	2.77864e+06	4037687	3.03965e+06	3.19229e+06	3.27487e+06	3601758	3037485	3146073	7.02995e+06	0.412997	-1.2758	0.0139524
(±)-3-Octyl acetate	C10H20O2	9738459	7.43292e+06	9378756	7251482	9339049	8226159	6.97687e+06	2.77864e+06	4037687	3.03965e+06	3.19229e+06	3.27487e+06	3601758	3037485	3146073	7.02995e+06	0.412997	-1.2758	0.0139524
Isoamyl isovalerate	C10H20O2	9738459	7.43292e+06	9378756	7251482	9339049	8226159	6.97687e+06	2.77864e+06	4037687	3.03965e+06	3.19229e+06	3.27487e+06	3601758	3037485	3146073	7.02995e+06	0.412997	-1.2758	0.0139524
Pentyl 3-methylbutanoate	C10H20O2	9738459	7.43292e+06	9378756	7251482	9339049	8226159	6.97687e+06	2.77864e+06	4037687	3.03965e+06	3.19229e+06	3.27487e+06	3601758	3037485	3146073	7.02995e+06	0.412997	-1.2758	0.0139524
Isooctyl acetate	C10H20O2	9738459	7.43292e+06	9378756	7251482	9339049	8226159	6.97687e+06	2.77864e+06	4037687	3.03965e+06	3.19229e+06	3.27487e+06	3601758	3037485	3146073	7.02995e+06	0.412997	-1.2758	0.0139524
Acetaldehyde 1,3-octanediol acetal	C10H20O2	9738459	7.43292e+06	9378756	7251482	9339049	8226159	6.97687e+06	2.77864e+06	4037687	3.03965e+06	3.19229e+06	3.27487e+06	3601758	3037485	3146073	7.02995e+06	0.412997	-1.2758	0.0139524
Ethyl 2-ethylhexanoate	C10H20O2	9738459	7.43292e+06	9378756	7251482	9339049	8226159	6.97687e+06	2.77864e+06	4037687	3.03965e+06	3.19229e+06	3.27487e+06	3601758	3037485	3146073	7.02995e+06	0.412997	-1.2758	0.0139524
Hexanal butane-2,3-diol acetal	C10H20O2	9738459	7.43292e+06	9378756	7251482	9339049	8226159	6.97687e+06	2.77864e+06	4037687	3.03965e+06	3.19229e+06	3.27487e+06	3601758	3037485	3146073	7.02995e+06	0.412997	-1.2758	0.0139524
Heptanal propyleneglycol acetal	C10H20O2	9738459	7.43292e+06	9378756	7251482	9339049	8226159	6.97687e+06	2.77864e+06	4037687	3.03965e+06	3.19229e+06	3.27487e+06	3601758	3037485	3146073	7.02995e+06	0.412997	-1.2758	0.0139524
(2S)-2-Ethylhexyl acetate	C10H20O2	9738459	7.43292e+06	9378756	7251482	9339049	8226159	6.97687e+06	2.77864e+06	4037687	3.03965e+06	3.19229e+06	3.27487e+06	3601758	3037485	3146073	7.02995e+06	0.412997	-1.2758	0.0139524
4-Ethyloctanoic acid	C10H20O2	9738459	7.43292e+06	9378756	7251482	9339049	8226159	6.97687e+06	2.77864e+06	4037687	3.03965e+06	3.19229e+06	3.27487e+06	3601758	3037485	3146073	7.02995e+06	0.412997	-1.2758	0.0139524
p-Menthane-3,8-diol	C10H20O2	9738459	7.43292e+06	9378756	7251482	9339049	8226159	6.97687e+06	2.77864e+06	4037687	3.03965e+06	3.19229e+06	3.27487e+06	3601758	3037485	3146073	7.02995e+06	0.412997	-1.2758	0.0139524
2-Methylpropyl hexanoate	C10H20O2	9738459	7.43292e+06	9378756	7251482	9339049	8226159	6.97687e+06	2.77864e+06	4037687	3.03965e+06	3.19229e+06	3.27487e+06	3601758	3037485	3146073	7.02995e+06	0.412997	-1.2758	0.0139524
7-Hydroxy-3,7-dimethyloctanal	C10H20O2	9738459	7.43292e+06	9378756	7251482	9339049	8226159	6.97687e+06	2.77864e+06	4037687	3.03965e+06	3.19229e+06	3.27487e+06	3601758	3037485	3146073	7.02995e+06	0.412997	-1.2758	0.0139524
2,6-Dimethyl-7-octene-2,6-diol	C10H20O2	9738459	7.43292e+06	9378756	7251482	9339049	8226159	6.97687e+06	2.77864e+06	4037687	3.03965e+06	3.19229e+06	3.27487e+06	3601758	3037485	3146073	7.02995e+06	0.412997	-1.2758	0.0139524
Methyl nonanoate	C10H20O2	9738459	7.43292e+06	9378756	7251482	9339049	8226159	6.97687e+06	2.77864e+06	4037687	3.03965e+06	3.19229e+06	3.27487e+06	3601758	3037485	3146073	7.02995e+06	0.412997	-1.2758	0.0139524
hexyl butyrate	C10H20O2	9738459	7.43292e+06	9378756	7251482	9339049	8226159	6.97687e+06	2.77864e+06	4037687	3.03965e+06	3.19229e+06	3.27487e+06	3601758	3037485	3146073	7.02995e+06	0.412997	-1.2758	0.0139524
Hexyl 2-methylpropanoate	C10H20O2	9738459	7.43292e+06	9378756	7251482	9339049	8226159	6.97687e+06	2.77864e+06	4037687	3.03965e+06	3.19229e+06	3.27487e+06	3601758	3037485	3146073	7.02995e+06	0.412997	-1.2758	0.0139524
(1S,3R,4R)-p-Menthane-1,3-diol	C10H20O2	9738459	7.43292e+06	9378756	7251482	9339049	8226159	6.97687e+06	2.77864e+06	4037687	3.03965e+06	3.19229e+06	3.27487e+06	3601758	3037485	3146073	7.02995e+06	0.412997	-1.2758	0.0139524
1beta,3beta,4alpha-p-menthane-3,8-diol	C10H20O2	9738459	7.43292e+06	9378756	7251482	9339049	8226159	6.97687e+06	2.77864e+06	4037687	3.03965e+06	3.19229e+06	3.27487e+06	3601758	3037485	3146073	7.02995e+06	0.412997	-1.2758	0.0139524
2-methyl nonaoic acid	C10H20O2	9738459	7.43292e+06	9378756	7251482	9339049	8226159	6.97687e+06	2.77864e+06	4037687	3.03965e+06	3.19229e+06	3.27487e+06	3601758	3037485	3146073	7.02995e+06	0.412997	-1.2758	0.0139524
2-Pentyl 3-methylbutanoate	C10H20O2	9738459	7.43292e+06	9378756	7251482	9339049	8226159	6.97687e+06	2.77864e+06	4037687	3.03965e+06	3.19229e+06	3.27487e+06	3601758	3037485	3146073	7.02995e+06	0.412997	-1.2758	0.0139524
formyl 4-methyl-octanoate	C10H20O2	9738459	7.43292e+06	9378756	7251482	9339049	8226159	6.97687e+06	2.77864e+06	4037687	3.03965e+06	3.19229e+06	3.27487e+06	3601758	3037485	3146073	7.02995e+06	0.412997	-1.2758	0.0139524
ethyl 4-methyl-heptanoate	C10H20O2	9738459	7.43292e+06	9378756	7251482	9339049	8226159	6.97687e+06	2.77864e+06	4037687	3.03965e+06	3.19229e+06	3.27487e+06	3601758	3037485	3146073	7.02995e+06	0.412997	-1.2758	0.0139524
1beta,3beta,4beta-p-menthane-3,8-diol	C10H20O2	9738459	7.43292e+06	9378756	7251482	9339049	8226159	6.97687e+06	2.77864e+06	4037687	3.03965e+06	3.19229e+06	3.27487e+06	3601758	3037485	3146073	7.02995e+06	0.412997	-1.2758	0.0139524
1beta,3alpha,4beta-p-menthane-3,8-diol	C10H20O2	9738459	7.43292e+06	9378756	7251482	9339049	8226159	6.97687e+06	2.77864e+06	4037687	3.03965e+06	3.19229e+06	3.27487e+06	3601758	3037485	3146073	7.02995e+06	0.412997	-1.2758	0.0139524
1alpha,3beta,4beta-p-menthane-3,8-diol	C10H20O2	9738459	7.43292e+06	9378756	7251482	9339049	8226159	6.97687e+06	2.77864e+06	4037687	3.03965e+06	3.19229e+06	3.27487e+06	3601758	3037485	3146073	7.02995e+06	0.412997	-1.2758	0.0139524
1beta,3alpha,4alpha-p-menthane-3,8-diol	C10H20O2	9738459	7.43292e+06	9378756	7251482	9339049	8226159	6.97687e+06	2.77864e+06	4037687	3.03965e+06	3.19229e+06	3.27487e+06	3601758	3037485	3146073	7.02995e+06	0.412997	-1.2758	0.0139524
1alpha,3alpha,4beta-p-menthane-3,8-diol	C10H20O2	9738459	7.43292e+06	9378756	7251482	9339049	8226159	6.97687e+06	2.77864e+06	4037687	3.03965e+06	3.19229e+06	3.27487e+06	3601758	3037485	3146073	7.02995e+06	0.412997	-1.2758	0.0139524
2-Hydroxydecan-3-one	C10H20O2	9738459	7.43292e+06	9378756	7251482	9339049	8226159	6.97687e+06	2.77864e+06	4037687	3.03965e+06	3.19229e+06	3.27487e+06	3601758	3037485	3146073	7.02995e+06	0.412997	-1.2758	0.0139524
3-Hydroxydecan-2-one	C10H20O2	9738459	7.43292e+06	9378756	7251482	9339049	8226159	6.97687e+06	2.77864e+06	4037687	3.03965e+06	3.19229e+06	3.27487e+06	3601758	3037485	3146073	7.02995e+06	0.412997	-1.2758	0.0139524
2S-Hydroxydecan-3-one	C10H20O2	9738459	7.43292e+06	9378756	7251482	9339049	8226159	6.97687e+06	2.77864e+06	4037687	3.03965e+06	3.19229e+06	3.27487e+06	3601758	3037485	3146073	7.02995e+06	0.412997	-1.2758	0.0139524
3-methyl-nonanoic acid	C10H20O2	9738459	7.43292e+06	9378756	7251482	9339049	8226159	6.97687e+06	2.77864e+06	4037687	3.03965e+06	3.19229e+06	3.27487e+06	3601758	3037485	3146073	7.02995e+06	0.412997	-1.2758	0.0139524
8-methyl-nonanoic acid	C10H20O2	9738459	7.43292e+06	9378756	7251482	9339049	8226159	6.97687e+06	2.77864e+06	4037687	3.03965e+06	3.19229e+06	3.27487e+06	3601758	3037485	3146073	7.02995e+06	0.412997	-1.2758	0.0139524
7-methyl-nonanoic acid	C10H20O2	9738459	7.43292e+06	9378756	7251482	9339049	8226159	6.97687e+06	2.77864e+06	4037687	3.03965e+06	3.19229e+06	3.27487e+06	3601758	3037485	3146073	7.02995e+06	0.412997	-1.2758	0.0139524
Cyclohexyl 3-methylbutanoate	C11H20O2	286991	228648	301005	247328	305922	248143	192236	79297.4	79043	57660.8	57477.7	43210.5	69316	65636.7	49907	84639.9	0.248849	-2.00666	0.00412741
Cyclohexyl pentanoate	C11H20O2	286991	228648	301005	247328	305922	248143	192236	79297.4	79043	57660.8	57477.7	43210.5	69316	65636.7	49907	84639.9	0.248849	-2.00666	0.00412741
5-Octenyl propanoate	C11H20O2	286991	228648	301005	247328	305922	248143	192236	79297.4	79043	57660.8	57477.7	43210.5	69316	65636.7	49907	84639.9	0.248849	-2.00666	0.00412741
cis-3-Hexenyl 2-methylbutanoate	C11H20O2	286991	228648	301005	247328	305922	248143	192236	79297.4	79043	57660.8	57477.7	43210.5	69316	65636.7	49907	84639.9	0.248849	-2.00666	0.00412741
(Z)-3-Hexenyl 3-methylbutanoate	C11H20O2	286991	228648	301005	247328	305922	248143	192236	79297.4	79043	57660.8	57477.7	43210.5	69316	65636.7	49907	84639.9	0.248849	-2.00666	0.00412741
2-Hexenyl valerate	C11H20O2	286991	228648	301005	247328	305922	248143	192236	79297.4	79043	57660.8	57477.7	43210.5	69316	65636.7	49907	84639.9	0.248849	-2.00666	0.00412741
2-Hexenyl isovalerate	C11H20O2	286991	228648	301005	247328	305922	248143	192236	79297.4	79043	57660.8	57477.7	43210.5	69316	65636.7	49907	84639.9	0.248849	-2.00666	0.00412741
gamma-undecalactone	C11H20O2	286991	228648	301005	247328	305922	248143	192236	79297.4	79043	57660.8	57477.7	43210.5	69316	65636.7	49907	84639.9	0.248849	-2.00666	0.00412741
trans-2-Hexyl-1-cyclopropaneacetic acid	C11H20O2	286991	228648	301005	247328	305922	248143	192236	79297.4	79043	57660.8	57477.7	43210.5	69316	65636.7	49907	84639.9	0.248849	-2.00666	0.00412741
(Z)-3-Methyl-4-decenoic acid	C11H20O2	286991	228648	301005	247328	305922	248143	192236	79297.4	79043	57660.8	57477.7	43210.5	69316	65636.7	49907	84639.9	0.248849	-2.00666	0.00412741
(Z)-3-Methyl-3-decenoic acid	C11H20O2	286991	228648	301005	247328	305922	248143	192236	79297.4	79043	57660.8	57477.7	43210.5	69316	65636.7	49907	84639.9	0.248849	-2.00666	0.00412741
2-Propenyl octanoate	C11H20O2	286991	228648	301005	247328	305922	248143	192236	79297.4	79043	57660.8	57477.7	43210.5	69316	65636.7	49907	84639.9	0.248849	-2.00666	0.00412741
3-Hexenyl 2-methylbutyrate	C11H20O2	286991	228648	301005	247328	305922	248143	192236	79297.4	79043	57660.8	57477.7	43210.5	69316	65636.7	49907	84639.9	0.248849	-2.00666	0.00412741
(E)-3-Heptenyl 2-methylpropanoate	C11H20O2	286991	228648	301005	247328	305922	248143	192236	79297.4	79043	57660.8	57477.7	43210.5	69316	65636.7	49907	84639.9	0.248849	-2.00666	0.00412741
Methyl 2-decenoate	C11H20O2	286991	228648	301005	247328	305922	248143	192236	79297.4	79043	57660.8	57477.7	43210.5	69316	65636.7	49907	84639.9	0.248849	-2.00666	0.00412741
6-Hexyltetrahydro-2H-pyran-2-one	C11H20O2	286991	228648	301005	247328	305922	248143	192236	79297.4	79043	57660.8	57477.7	43210.5	69316	65636.7	49907	84639.9	0.248849	-2.00666	0.00412741
5-Hexyldihydro-5-methyl-2(3H)-furanone	C11H20O2	286991	228648	301005	247328	305922	248143	192236	79297.4	79043	57660.8	57477.7	43210.5	69316	65636.7	49907	84639.9	0.248849	-2.00666	0.00412741
cis-3-Hexenyl pentanoate	C11H20O2	286991	228648	301005	247328	305922	248143	192236	79297.4	79043	57660.8	57477.7	43210.5	69316	65636.7	49907	84639.9	0.248849	-2.00666	0.00412741
2,3-Undecanedione	C11H20O2	286991	228648	301005	247328	305922	248143	192236	79297.4	79043	57660.8	57477.7	43210.5	69316	65636.7	49907	84639.9	0.248849	-2.00666	0.00412741
Ethyl (E)-2-nonenoate	C11H20O2	286991	228648	301005	247328	305922	248143	192236	79297.4	79043	57660.8	57477.7	43210.5	69316	65636.7	49907	84639.9	0.248849	-2.00666	0.00412741
Ethyl 3-cyclohexylpropionate	C11H20O2	286991	228648	301005	247328	305922	248143	192236	79297.4	79043	57660.8	57477.7	43210.5	69316	65636.7	49907	84639.9	0.248849	-2.00666	0.00412741
Citronellyl formate	C11H20O2	286991	228648	301005	247328	305922	248143	192236	79297.4	79043	57660.8	57477.7	43210.5	69316	65636.7	49907	84639.9	0.248849	-2.00666	0.00412741
10-hendecenoic acid	C11H20O2	286991	228648	301005	247328	305922	248143	192236	79297.4	79043	57660.8	57477.7	43210.5	69316	65636.7	49907	84639.9	0.248849	-2.00666	0.00412741
5-Hexyldihydro-4-methyl-2(3H)-furanone	C11H20O2	286991	228648	301005	247328	305922	248143	192236	79297.4	79043	57660.8	57477.7	43210.5	69316	65636.7	49907	84639.9	0.248849	-2.00666	0.00412741
(x)-1-Nonen-3-yl acetate	C11H20O2	286991	228648	301005	247328	305922	248143	192236	79297.4	79043	57660.8	57477.7	43210.5	69316	65636.7	49907	84639.9	0.248849	-2.00666	0.00412741
Rhodinyl formate	C11H20O2	286991	228648	301005	247328	305922	248143	192236	79297.4	79043	57660.8	57477.7	43210.5	69316	65636.7	49907	84639.9	0.248849	-2.00666	0.00412741
formyl 3,7-dimethyl-6E-octenoate	C11H20O2	286991	228648	301005	247328	305922	248143	192236	79297.4	79043	57660.8	57477.7	43210.5	69316	65636.7	49907	84639.9	0.248849	-2.00666	0.00412741
cis-3-Octenyl propionate	C11H20O2	286991	228648	301005	247328	305922	248143	192236	79297.4	79043	57660.8	57477.7	43210.5	69316	65636.7	49907	84639.9	0.248849	-2.00666	0.00412741
Pent-2-enyl hexanoate	C11H20O2	286991	228648	301005	247328	305922	248143	192236	79297.4	79043	57660.8	57477.7	43210.5	69316	65636.7	49907	84639.9	0.248849	-2.00666	0.00412741
6-Methyl-5-hepten-2-one propyleneglycol acetal	C11H20O2	286991	228648	301005	247328	305922	248143	192236	79297.4	79043	57660.8	57477.7	43210.5	69316	65636.7	49907	84639.9	0.248849	-2.00666	0.00412741
Prenyl caproate	C11H20O2	286991	228648	301005	247328	305922	248143	192236	79297.4	79043	57660.8	57477.7	43210.5	69316	65636.7	49907	84639.9	0.248849	-2.00666	0.00412741
trans-2-Hexenyl 2-methylbutyrate	C11H20O2	286991	228648	301005	247328	305922	248143	192236	79297.4	79043	57660.8	57477.7	43210.5	69316	65636.7	49907	84639.9	0.248849	-2.00666	0.00412741
2-Ethylhexyl acrylate	C11H20O2	286991	228648	301005	247328	305922	248143	192236	79297.4	79043	57660.8	57477.7	43210.5	69316	65636.7	49907	84639.9	0.248849	-2.00666	0.00412741
gamma-Undecalactone	C11H20O2	286991	228648	301005	247328	305922	248143	192236	79297.4	79043	57660.8	57477.7	43210.5	69316	65636.7	49907	84639.9	0.248849	-2.00666	0.00412741
11-undecanolactone	C11H20O2	286991	228648	301005	247328	305922	248143	192236	79297.4	79043	57660.8	57477.7	43210.5	69316	65636.7	49907	84639.9	0.248849	-2.00666	0.00412741
6E-Nonenyl acetate	C11H20O2	286991	228648	301005	247328	305922	248143	192236	79297.4	79043	57660.8	57477.7	43210.5	69316	65636.7	49907	84639.9	0.248849	-2.00666	0.00412741
2-Nonenyl acetate	C11H20O2	286991	228648	301005	247328	305922	248143	192236	79297.4	79043	57660.8	57477.7	43210.5	69316	65636.7	49907	84639.9	0.248849	-2.00666	0.00412741
formyl 4Z-decenoate	C11H20O2	286991	228648	301005	247328	305922	248143	192236	79297.4	79043	57660.8	57477.7	43210.5	69316	65636.7	49907	84639.9	0.248849	-2.00666	0.00412741
(2S,6R,8S)-2,8-Dimethyl-1,7-dioxaspiro[5.5]undecane	C11H20O2	286991	228648	301005	247328	305922	248143	192236	79297.4	79043	57660.8	57477.7	43210.5	69316	65636.7	49907	84639.9	0.248849	-2.00666	0.00412741
2-Ethyl-7-methyl-1,6-dioxaspiro[4.5]decane	C11H20O2	286991	228648	301005	247328	305922	248143	192236	79297.4	79043	57660.8	57477.7	43210.5	69316	65636.7	49907	84639.9	0.248849	-2.00666	0.00412741
2-Methyl-1,7-dioxaspiro[5.6]dodecane	C11H20O2	286991	228648	301005	247328	305922	248143	192236	79297.4	79043	57660.8	57477.7	43210.5	69316	65636.7	49907	84639.9	0.248849	-2.00666	0.00412741
2,7-Diethyl-1,6-dioxaspiro[4.4]nonane	C11H20O2	286991	228648	301005	247328	305922	248143	192236	79297.4	79043	57660.8	57477.7	43210.5	69316	65636.7	49907	84639.9	0.248849	-2.00666	0.00412741
7-Ethyl-2R-methyl-1,6-dioxaspiro[4.5]decane	C11H20O2	286991	228648	301005	247328	305922	248143	192236	79297.4	79043	57660.8	57477.7	43210.5	69316	65636.7	49907	84639.9	0.248849	-2.00666	0.00412741
2-Ethyl-1,7-dioxaspiro[5.5]undecane	C11H20O2	286991	228648	301005	247328	305922	248143	192236	79297.4	79043	57660.8	57477.7	43210.5	69316	65636.7	49907	84639.9	0.248849	-2.00666	0.00412741
2S-Ethyl-7-methyl-1,6-dioxaspiro[4.5]decane	C11H20O2	286991	228648	301005	247328	305922	248143	192236	79297.4	79043	57660.8	57477.7	43210.5	69316	65636.7	49907	84639.9	0.248849	-2.00666	0.00412741
(2S,6S,8S)-2,8-Dimethyl-1,7-dioxaspiro[5.5]undecane	C11H20O2	286991	228648	301005	247328	305922	248143	192236	79297.4	79043	57660.8	57477.7	43210.5	69316	65636.7	49907	84639.9	0.248849	-2.00666	0.00412741
2-Methyl-7-propyl-1,6-dioxaspiro[4.4]nonane	C11H20O2	286991	228648	301005	247328	305922	248143	192236	79297.4	79043	57660.8	57477.7	43210.5	69316	65636.7	49907	84639.9	0.248849	-2.00666	0.00412741
2,7-Dimethyl-1,6-dioxaspiro[4.6]undecane	C11H20O2	286991	228648	301005	247328	305922	248143	192236	79297.4	79043	57660.8	57477.7	43210.5	69316	65636.7	49907	84639.9	0.248849	-2.00666	0.00412741
7-undecenoic acid	C11H20O2	286991	228648	301005	247328	305922	248143	192236	79297.4	79043	57660.8	57477.7	43210.5	69316	65636.7	49907	84639.9	0.248849	-2.00666	0.00412741
6-undecenoic acid	C11H20O2	286991	228648	301005	247328	305922	248143	192236	79297.4	79043	57660.8	57477.7	43210.5	69316	65636.7	49907	84639.9	0.248849	-2.00666	0.00412741
4-undecenoic acid	C11H20O2	286991	228648	301005	247328	305922	248143	192236	79297.4	79043	57660.8	57477.7	43210.5	69316	65636.7	49907	84639.9	0.248849	-2.00666	0.00412741
5Z-undecenoic acid	C11H20O2	286991	228648	301005	247328	305922	248143	192236	79297.4	79043	57660.8	57477.7	43210.5	69316	65636.7	49907	84639.9	0.248849	-2.00666	0.00412741
5E-undecenoic acid	C11H20O2	286991	228648	301005	247328	305922	248143	192236	79297.4	79043	57660.8	57477.7	43210.5	69316	65636.7	49907	84639.9	0.248849	-2.00666	0.00412741
9-hendecenoic acid	C11H20O2	286991	228648	301005	247328	305922	248143	192236	79297.4	79043	57660.8	57477.7	43210.5	69316	65636.7	49907	84639.9	0.248849	-2.00666	0.00412741
2-hendecenoic acid	C11H20O2	286991	228648	301005	247328	305922	248143	192236	79297.4	79043	57660.8	57477.7	43210.5	69316	65636.7	49907	84639.9	0.248849	-2.00666	0.00412741
6Z-undecenoic acid	C11H20O2	286991	228648	301005	247328	305922	248143	192236	79297.4	79043	57660.8	57477.7	43210.5	69316	65636.7	49907	84639.9	0.248849	-2.00666	0.00412741
3E-undecenoic acid	C11H20O2	286991	228648	301005	247328	305922	248143	192236	79297.4	79043	57660.8	57477.7	43210.5	69316	65636.7	49907	84639.9	0.248849	-2.00666	0.00412741
2Z-undecenoic acid	C11H20O2	286991	228648	301005	247328	305922	248143	192236	79297.4	79043	57660.8	57477.7	43210.5	69316	65636.7	49907	84639.9	0.248849	-2.00666	0.00412741
9Z-undecenoic acid	C11H20O2	286991	228648	301005	247328	305922	248143	192236	79297.4	79043	57660.8	57477.7	43210.5	69316	65636.7	49907	84639.9	0.248849	-2.00666	0.00412741
8Z-undecenoic acid	C11H20O2	286991	228648	301005	247328	305922	248143	192236	79297.4	79043	57660.8	57477.7	43210.5	69316	65636.7	49907	84639.9	0.248849	-2.00666	0.00412741
2,7-dimethyl-6-nonenoic acid	C11H20O2	286991	228648	301005	247328	305922	248143	192236	79297.4	79043	57660.8	57477.7	43210.5	69316	65636.7	49907	84639.9	0.248849	-2.00666	0.00412741
4-ethyl-2-methyl-2-octenoic acid	C11H20O2	286991	228648	301005	247328	305922	248143	192236	79297.4	79043	57660.8	57477.7	43210.5	69316	65636.7	49907	84639.9	0.248849	-2.00666	0.00412741
Undecylic acid	C11H22O2	1.73029e+06	1.23412e+06	1.65599e+06	1.2052e+06	1.69875e+06	1.35488e+06	1.21874e+06	298319	455590	318419	311751	361956	360502	282443	365694	792219	0.279049	-1.84141	0.00735225
Heptyl butyrate	C11H22O2	1.73029e+06	1.23412e+06	1.65599e+06	1.2052e+06	1.69875e+06	1.35488e+06	1.21874e+06	298319	455590	318419	311751	361956	360502	282443	365694	792219	0.279049	-1.84141	0.00735225
9-methyl-decanoic acid	C11H22O2	1.73029e+06	1.23412e+06	1.65599e+06	1.2052e+06	1.69875e+06	1.35488e+06	1.21874e+06	298319	455590	318419	311751	361956	360502	282443	365694	792219	0.279049	-1.84141	0.00735225
Isobutyl enanthate	C11H22O2	1.73029e+06	1.23412e+06	1.65599e+06	1.2052e+06	1.69875e+06	1.35488e+06	1.21874e+06	298319	455590	318419	311751	361956	360502	282443	365694	792219	0.279049	-1.84141	0.00735225
Octyl propanoate	C11H22O2	1.73029e+06	1.23412e+06	1.65599e+06	1.2052e+06	1.69875e+06	1.35488e+06	1.21874e+06	298319	455590	318419	311751	361956	360502	282443	365694	792219	0.279049	-1.84141	0.00735225
7,7-Diethoxy-3-heptene	C11H22O2	1.73029e+06	1.23412e+06	1.65599e+06	1.2052e+06	1.69875e+06	1.35488e+06	1.21874e+06	298319	455590	318419	311751	361956	360502	282443	365694	792219	0.279049	-1.84141	0.00735225
8-methyl-decanoic acid	C11H22O2	1.73029e+06	1.23412e+06	1.65599e+06	1.2052e+06	1.69875e+06	1.35488e+06	1.21874e+06	298319	455590	318419	311751	361956	360502	282443	365694	792219	0.279049	-1.84141	0.00735225
formyl decanoate	C11H22O2	1.73029e+06	1.23412e+06	1.65599e+06	1.2052e+06	1.69875e+06	1.35488e+06	1.21874e+06	298319	455590	318419	311751	361956	360502	282443	365694	792219	0.279049	-1.84141	0.00735225
2-Methylbutyl hexanoate	C11H22O2	1.73029e+06	1.23412e+06	1.65599e+06	1.2052e+06	1.69875e+06	1.35488e+06	1.21874e+06	298319	455590	318419	311751	361956	360502	282443	365694	792219	0.279049	-1.84141	0.00735225
Propyl octanoate	C11H22O2	1.73029e+06	1.23412e+06	1.65599e+06	1.2052e+06	1.69875e+06	1.35488e+06	1.21874e+06	298319	455590	318419	311751	361956	360502	282443	365694	792219	0.279049	-1.84141	0.00735225
Hexyl 2-methylbutanoate	C11H22O2	1.73029e+06	1.23412e+06	1.65599e+06	1.2052e+06	1.69875e+06	1.35488e+06	1.21874e+06	298319	455590	318419	311751	361956	360502	282443	365694	792219	0.279049	-1.84141	0.00735225
Ethyl nonanoate	C11H22O2	1.73029e+06	1.23412e+06	1.65599e+06	1.2052e+06	1.69875e+06	1.35488e+06	1.21874e+06	298319	455590	318419	311751	361956	360502	282443	365694	792219	0.279049	-1.84141	0.00735225
Heptyl 2-methylpropanoate	C11H22O2	1.73029e+06	1.23412e+06	1.65599e+06	1.2052e+06	1.69875e+06	1.35488e+06	1.21874e+06	298319	455590	318419	311751	361956	360502	282443	365694	792219	0.279049	-1.84141	0.00735225
Nonyl acetate	C11H22O2	1.73029e+06	1.23412e+06	1.65599e+06	1.2052e+06	1.69875e+06	1.35488e+06	1.21874e+06	298319	455590	318419	311751	361956	360502	282443	365694	792219	0.279049	-1.84141	0.00735225
Hexyl 3-methylbutanoate	C11H22O2	1.73029e+06	1.23412e+06	1.65599e+06	1.2052e+06	1.69875e+06	1.35488e+06	1.21874e+06	298319	455590	318419	311751	361956	360502	282443	365694	792219	0.279049	-1.84141	0.00735225
2-Hexyl-4,5-dimethyl-1,3-dioxolane	C11H22O2	1.73029e+06	1.23412e+06	1.65599e+06	1.2052e+06	1.69875e+06	1.35488e+06	1.21874e+06	298319	455590	318419	311751	361956	360502	282443	365694	792219	0.279049	-1.84141	0.00735225
6,6-Dimethoxy-2,5,5-trimethyl-2-hexene	C11H22O2	1.73029e+06	1.23412e+06	1.65599e+06	1.2052e+06	1.69875e+06	1.35488e+06	1.21874e+06	298319	455590	318419	311751	361956	360502	282443	365694	792219	0.279049	-1.84141	0.00735225
valeryl hexanoate	C11H22O2	1.73029e+06	1.23412e+06	1.65599e+06	1.2052e+06	1.69875e+06	1.35488e+06	1.21874e+06	298319	455590	318419	311751	361956	360502	282443	365694	792219	0.279049	-1.84141	0.00735225
4,8-dimethyl-nonanoic acid	C11H22O2	1.73029e+06	1.23412e+06	1.65599e+06	1.2052e+06	1.69875e+06	1.35488e+06	1.21874e+06	298319	455590	318419	311751	361956	360502	282443	365694	792219	0.279049	-1.84141	0.00735225
Butyl heptanoate	C11H22O2	1.73029e+06	1.23412e+06	1.65599e+06	1.2052e+06	1.69875e+06	1.35488e+06	1.21874e+06	298319	455590	318419	311751	361956	360502	282443	365694	792219	0.279049	-1.84141	0.00735225
3-Methylbutyl hexanoate	C11H22O2	1.73029e+06	1.23412e+06	1.65599e+06	1.2052e+06	1.69875e+06	1.35488e+06	1.21874e+06	298319	455590	318419	311751	361956	360502	282443	365694	792219	0.279049	-1.84141	0.00735225
Octanal propyleneglycol acetal	C11H22O2	1.73029e+06	1.23412e+06	1.65599e+06	1.2052e+06	1.69875e+06	1.35488e+06	1.21874e+06	298319	455590	318419	311751	361956	360502	282443	365694	792219	0.279049	-1.84141	0.00735225
2-methyl-decanoic acid	C11H22O2	1.73029e+06	1.23412e+06	1.65599e+06	1.2052e+06	1.69875e+06	1.35488e+06	1.21874e+06	298319	455590	318419	311751	361956	360502	282443	365694	792219	0.279049	-1.84141	0.00735225
4-Methyloctyl acetate	C11H22O2	1.73029e+06	1.23412e+06	1.65599e+06	1.2052e+06	1.69875e+06	1.35488e+06	1.21874e+06	298319	455590	318419	311751	361956	360502	282443	365694	792219	0.279049	-1.84141	0.00735225
Isopropyl octanoate	C11H22O2	1.73029e+06	1.23412e+06	1.65599e+06	1.2052e+06	1.69875e+06	1.35488e+06	1.21874e+06	298319	455590	318419	311751	361956	360502	282443	365694	792219	0.279049	-1.84141	0.00735225
3,7-Dimethyl-6-octenyl formate	C11H22O2	1.73029e+06	1.23412e+06	1.65599e+06	1.2052e+06	1.69875e+06	1.35488e+06	1.21874e+06	298319	455590	318419	311751	361956	360502	282443	365694	792219	0.279049	-1.84141	0.00735225
Methyl 3,7-dimethyl-6-octenoate	C11H22O2	1.73029e+06	1.23412e+06	1.65599e+06	1.2052e+06	1.69875e+06	1.35488e+06	1.21874e+06	298319	455590	318419	311751	361956	360502	282443	365694	792219	0.279049	-1.84141	0.00735225
ethyl 4-methyl-octanoate	C11H22O2	1.73029e+06	1.23412e+06	1.65599e+06	1.2052e+06	1.69875e+06	1.35488e+06	1.21874e+06	298319	455590	318419	311751	361956	360502	282443	365694	792219	0.279049	-1.84141	0.00735225
decyl formate	C11H22O2	1.73029e+06	1.23412e+06	1.65599e+06	1.2052e+06	1.69875e+06	1.35488e+06	1.21874e+06	298319	455590	318419	311751	361956	360502	282443	365694	792219	0.279049	-1.84141	0.00735225
2-Hydroxyundecan-6-one	C11H22O2	1.73029e+06	1.23412e+06	1.65599e+06	1.2052e+06	1.69875e+06	1.35488e+06	1.21874e+06	298319	455590	318419	311751	361956	360502	282443	365694	792219	0.279049	-1.84141	0.00735225
3,3-dimethyl-nonanoic acid	C11H22O2	1.73029e+06	1.23412e+06	1.65599e+06	1.2052e+06	1.69875e+06	1.35488e+06	1.21874e+06	298319	455590	318419	311751	361956	360502	282443	365694	792219	0.279049	-1.84141	0.00735225
6-methyl-decanoic acid	C11H22O2	1.73029e+06	1.23412e+06	1.65599e+06	1.2052e+06	1.69875e+06	1.35488e+06	1.21874e+06	298319	455590	318419	311751	361956	360502	282443	365694	792219	0.279049	-1.84141	0.00735225
5-methyl-decanoic acid	C11H22O2	1.73029e+06	1.23412e+06	1.65599e+06	1.2052e+06	1.69875e+06	1.35488e+06	1.21874e+06	298319	455590	318419	311751	361956	360502	282443	365694	792219	0.279049	-1.84141	0.00735225
7-methyl-decanoic acid	C11H22O2	1.73029e+06	1.23412e+06	1.65599e+06	1.2052e+06	1.69875e+06	1.35488e+06	1.21874e+06	298319	455590	318419	311751	361956	360502	282443	365694	792219	0.279049	-1.84141	0.00735225
4-methyl-decanoic acid	C11H22O2	1.73029e+06	1.23412e+06	1.65599e+06	1.2052e+06	1.69875e+06	1.35488e+06	1.21874e+06	298319	455590	318419	311751	361956	360502	282443	365694	792219	0.279049	-1.84141	0.00735225
3-methyl-decanoic acid	C11H22O2	1.73029e+06	1.23412e+06	1.65599e+06	1.2052e+06	1.69875e+06	1.35488e+06	1.21874e+06	298319	455590	318419	311751	361956	360502	282443	365694	792219	0.279049	-1.84141	0.00735225
5R-methyl-decanoic acid	C11H22O2	1.73029e+06	1.23412e+06	1.65599e+06	1.2052e+06	1.69875e+06	1.35488e+06	1.21874e+06	298319	455590	318419	311751	361956	360502	282443	365694	792219	0.279049	-1.84141	0.00735225
9:0(8Me,8Me)	C11H22O2	1.73029e+06	1.23412e+06	1.65599e+06	1.2052e+06	1.69875e+06	1.35488e+06	1.21874e+06	298319	455590	318419	311751	361956	360502	282443	365694	792219	0.279049	-1.84141	0.00735225
6-Pentyl-1,4-dioxan-2-one	C9H16O3	826318	878308	1.16112e+06	990792	1.11744e+06	898486	894253	701173	387395	432492	431069	293820	397697	402982	352894	574682	0.446623	-1.16287	0.000762174
5-Pentyl-1,4-dioxan-2-one	C9H16O3	826318	878308	1.16112e+06	990792	1.11744e+06	898486	894253	701173	387395	432492	431069	293820	397697	402982	352894	574682	0.446623	-1.16287	0.000762174
4-hydroperoxynonenal	C9H16O3	826318	878308	1.16112e+06	990792	1.11744e+06	898486	894253	701173	387395	432492	431069	293820	397697	402982	352894	574682	0.446623	-1.16287	0.000762174
Butyl 3-hydroxy-2-methylidenebutanoate	C9H16O3	826318	878308	1.16112e+06	990792	1.11744e+06	898486	894253	701173	387395	432492	431069	293820	397697	402982	352894	574682	0.446623	-1.16287	0.000762174
2-Methylpropyl 3-hydroxy-2-methylidenebutanoate	C9H16O3	826318	878308	1.16112e+06	990792	1.11744e+06	898486	894253	701173	387395	432492	431069	293820	397697	402982	352894	574682	0.446623	-1.16287	0.000762174
Butyl levulinate	C9H16O3	826318	878308	1.16112e+06	990792	1.11744e+06	898486	894253	701173	387395	432492	431069	293820	397697	402982	352894	574682	0.446623	-1.16287	0.000762174
Tetrahydrofurfuryl butyrate	C9H16O3	826318	878308	1.16112e+06	990792	1.11744e+06	898486	894253	701173	387395	432492	431069	293820	397697	402982	352894	574682	0.446623	-1.16287	0.000762174
cis-3-Hexenyl lactate	C9H16O3	826318	878308	1.16112e+06	990792	1.11744e+06	898486	894253	701173	387395	432492	431069	293820	397697	402982	352894	574682	0.446623	-1.16287	0.000762174
3-Methylbutyl 3-oxobutanoate	C9H16O3	826318	878308	1.16112e+06	990792	1.11744e+06	898486	894253	701173	387395	432492	431069	293820	397697	402982	352894	574682	0.446623	-1.16287	0.000762174
9-oxo-nonanoic acid	C9H16O3	826318	878308	1.16112e+06	990792	1.11744e+06	898486	894253	701173	387395	432492	431069	293820	397697	402982	352894	574682	0.446623	-1.16287	0.000762174
(4S,6S)-4-Hydroxy-1,7-dioxaspiro[5.5]undecane	C9H16O3	826318	878308	1.16112e+06	990792	1.11744e+06	898486	894253	701173	387395	432492	431069	293820	397697	402982	352894	574682	0.446623	-1.16287	0.000762174
(4R,6S)-4-Hydroxy-1,7-dioxaspiro[5.5]undecane	C9H16O3	826318	878308	1.16112e+06	990792	1.11744e+06	898486	894253	701173	387395	432492	431069	293820	397697	402982	352894	574682	0.446623	-1.16287	0.000762174
(3S,6S)-3-Hydroxy-1,7-dioxaspiro[5.5]undecane	C9H16O3	826318	878308	1.16112e+06	990792	1.11744e+06	898486	894253	701173	387395	432492	431069	293820	397697	402982	352894	574682	0.446623	-1.16287	0.000762174
(3R,6S)-3-Hydroxy-1,7-dioxaspiro[5.5]undecane	C9H16O3	826318	878308	1.16112e+06	990792	1.11744e+06	898486	894253	701173	387395	432492	431069	293820	397697	402982	352894	574682	0.446623	-1.16287	0.000762174
4-n-valeryl butyric acid	C9H16O3	826318	878308	1.16112e+06	990792	1.11744e+06	898486	894253	701173	387395	432492	431069	293820	397697	402982	352894	574682	0.446623	-1.16287	0.000762174
3-caproyl propionic acid	C9H16O3	826318	878308	1.16112e+06	990792	1.11744e+06	898486	894253	701173	387395	432492	431069	293820	397697	402982	352894	574682	0.446623	-1.16287	0.000762174
6-propionyl n-caproic acid	C9H16O3	826318	878308	1.16112e+06	990792	1.11744e+06	898486	894253	701173	387395	432492	431069	293820	397697	402982	352894	574682	0.446623	-1.16287	0.000762174
n-butyrl n-valeric acid	C9H16O3	826318	878308	1.16112e+06	990792	1.11744e+06	898486	894253	701173	387395	432492	431069	293820	397697	402982	352894	574682	0.446623	-1.16287	0.000762174
n-heptanoyl acetic acid	C9H16O3	826318	878308	1.16112e+06	990792	1.11744e+06	898486	894253	701173	387395	432492	431069	293820	397697	402982	352894	574682	0.446623	-1.16287	0.000762174
8-oxo-nonanoic acid	C9H16O3	826318	878308	1.16112e+06	990792	1.11744e+06	898486	894253	701173	387395	432492	431069	293820	397697	402982	352894	574682	0.446623	-1.16287	0.000762174
7-methyl-4-oxo-octanoic acid	C9H16O3	826318	878308	1.16112e+06	990792	1.11744e+06	898486	894253	701173	387395	432492	431069	293820	397697	402982	352894	574682	0.446623	-1.16287	0.000762174
3-oxo-nonanoic acid	C9H16O3	826318	878308	1.16112e+06	990792	1.11744e+06	898486	894253	701173	387395	432492	431069	293820	397697	402982	352894	574682	0.446623	-1.16287	0.000762174
7-methyl-6-oxo-octanoic acid	C9H16O3	826318	878308	1.16112e+06	990792	1.11744e+06	898486	894253	701173	387395	432492	431069	293820	397697	402982	352894	574682	0.446623	-1.16287	0.000762174
7-methyl-3-oxooctanoic acid	C9H16O3	826318	878308	1.16112e+06	990792	1.11744e+06	898486	894253	701173	387395	432492	431069	293820	397697	402982	352894	574682	0.446623	-1.16287	0.000762174
9-hydroxy-5Z-nonenoic acid	C9H16O3	826318	878308	1.16112e+06	990792	1.11744e+06	898486	894253	701173	387395	432492	431069	293820	397697	402982	352894	574682	0.446623	-1.16287	0.000762174
Polypropylene glycol (m w 1,200-3,000)	C6H14O3	603732	495105	681634	722025	569496	622129	533990	801732	114024	203876	153606	144041	238635	63601.7	136212	192393	0.242807	-2.04212	0.00038745
1,2,6-Hexanetriol	C6H14O3	603732	495105	681634	722025	569496	622129	533990	801732	114024	203876	153606	144041	238635	63601.7	136212	192393	0.242807	-2.04212	0.00038745
3-(2-Hydroxy-4-methylphenyl)-2-butanone	C11H14O2	210485	251588	246389	162463	208134	214621	175367	31167.1	74480.9	45569.7	56983.8	83820.8	40320.3	45205.7	87925.9	147802	0.314044	-1.67096	0.0174293
2-Phenylethyl propanoate	C11H14O2	210485	251588	246389	162463	208134	214621	175367	31167.1	74480.9	45569.7	56983.8	83820.8	40320.3	45205.7	87925.9	147802	0.314044	-1.67096	0.0174293
2-Methylpropyl benzoate	C11H14O2	210485	251588	246389	162463	208134	214621	175367	31167.1	74480.9	45569.7	56983.8	83820.8	40320.3	45205.7	87925.9	147802	0.314044	-1.67096	0.0174293
2-Ethoxy-5-(1-propenyl)phenol	C11H14O2	210485	251588	246389	162463	208134	214621	175367	31167.1	74480.9	45569.7	56983.8	83820.8	40320.3	45205.7	87925.9	147802	0.314044	-1.67096	0.0174293
Osmorhizole	C11H14O2	210485	251588	246389	162463	208134	214621	175367	31167.1	74480.9	45569.7	56983.8	83820.8	40320.3	45205.7	87925.9	147802	0.314044	-1.67096	0.0174293
1-Phenylethyl propanoate	C11H14O2	210485	251588	246389	162463	208134	214621	175367	31167.1	74480.9	45569.7	56983.8	83820.8	40320.3	45205.7	87925.9	147802	0.314044	-1.67096	0.0174293
Ethyl 3-phenylpropanoate	C11H14O2	210485	251588	246389	162463	208134	214621	175367	31167.1	74480.9	45569.7	56983.8	83820.8	40320.3	45205.7	87925.9	147802	0.314044	-1.67096	0.0174293
Propyl phenylacetate	C11H14O2	210485	251588	246389	162463	208134	214621	175367	31167.1	74480.9	45569.7	56983.8	83820.8	40320.3	45205.7	87925.9	147802	0.314044	-1.67096	0.0174293
Isopropyl phenylacetate	C11H14O2	210485	251588	246389	162463	208134	214621	175367	31167.1	74480.9	45569.7	56983.8	83820.8	40320.3	45205.7	87925.9	147802	0.314044	-1.67096	0.0174293
alpha,alpha-Dimethylphenethyl formate	C11H14O2	210485	251588	246389	162463	208134	214621	175367	31167.1	74480.9	45569.7	56983.8	83820.8	40320.3	45205.7	87925.9	147802	0.314044	-1.67096	0.0174293
Methyl 4-phenylbutanoate	C11H14O2	210485	251588	246389	162463	208134	214621	175367	31167.1	74480.9	45569.7	56983.8	83820.8	40320.3	45205.7	87925.9	147802	0.314044	-1.67096	0.0174293
Methylisoeugenol	C11H14O2	210485	251588	246389	162463	208134	214621	175367	31167.1	74480.9	45569.7	56983.8	83820.8	40320.3	45205.7	87925.9	147802	0.314044	-1.67096	0.0174293
5-Phenylvaleric acid	C11H14O2	210485	251588	246389	162463	208134	214621	175367	31167.1	74480.9	45569.7	56983.8	83820.8	40320.3	45205.7	87925.9	147802	0.314044	-1.67096	0.0174293
Methyleugenol	C11H14O2	210485	251588	246389	162463	208134	214621	175367	31167.1	74480.9	45569.7	56983.8	83820.8	40320.3	45205.7	87925.9	147802	0.314044	-1.67096	0.0174293
Phenylmethyl 2-methylpropanoate	C11H14O2	210485	251588	246389	162463	208134	214621	175367	31167.1	74480.9	45569.7	56983.8	83820.8	40320.3	45205.7	87925.9	147802	0.314044	-1.67096	0.0174293
3-Phenylpropyl acetate	C11H14O2	210485	251588	246389	162463	208134	214621	175367	31167.1	74480.9	45569.7	56983.8	83820.8	40320.3	45205.7	87925.9	147802	0.314044	-1.67096	0.0174293
Phenylmethyl butanoate	C11H14O2	210485	251588	246389	162463	208134	214621	175367	31167.1	74480.9	45569.7	56983.8	83820.8	40320.3	45205.7	87925.9	147802	0.314044	-1.67096	0.0174293
4-(4-Methoxyphenyl)-2-butanone	C11H14O2	210485	251588	246389	162463	208134	214621	175367	31167.1	74480.9	45569.7	56983.8	83820.8	40320.3	45205.7	87925.9	147802	0.314044	-1.67096	0.0174293
p-Tolyl isobutyrate	C11H14O2	210485	251588	246389	162463	208134	214621	175367	31167.1	74480.9	45569.7	56983.8	83820.8	40320.3	45205.7	87925.9	147802	0.314044	-1.67096	0.0174293
2-Methylphenyl 2-methylpropanoate	C11H14O2	210485	251588	246389	162463	208134	214621	175367	31167.1	74480.9	45569.7	56983.8	83820.8	40320.3	45205.7	87925.9	147802	0.314044	-1.67096	0.0174293
Methylisoeugenol	C11H14O2	210485	251588	246389	162463	208134	214621	175367	31167.1	74480.9	45569.7	56983.8	83820.8	40320.3	45205.7	87925.9	147802	0.314044	-1.67096	0.0174293
4-t-Butylbenzoic acid	C11H14O2	210485	251588	246389	162463	208134	214621	175367	31167.1	74480.9	45569.7	56983.8	83820.8	40320.3	45205.7	87925.9	147802	0.314044	-1.67096	0.0174293
1,1-Dimethylethyl benzoate	C11H14O2	210485	251588	246389	162463	208134	214621	175367	31167.1	74480.9	45569.7	56983.8	83820.8	40320.3	45205.7	87925.9	147802	0.314044	-1.67096	0.0174293
3,5-Dimethoxyallylbenzene	C11H14O2	210485	251588	246389	162463	208134	214621	175367	31167.1	74480.9	45569.7	56983.8	83820.8	40320.3	45205.7	87925.9	147802	0.314044	-1.67096	0.0174293
1-Phenylpropyl acetate	C11H14O2	210485	251588	246389	162463	208134	214621	175367	31167.1	74480.9	45569.7	56983.8	83820.8	40320.3	45205.7	87925.9	147802	0.314044	-1.67096	0.0174293
2-Phenylpropyl acetate	C11H14O2	210485	251588	246389	162463	208134	214621	175367	31167.1	74480.9	45569.7	56983.8	83820.8	40320.3	45205.7	87925.9	147802	0.314044	-1.67096	0.0174293
Imiquimod	C14H16N4	183440	128448	199967	191285	211889	182694	156252	41211	42928.5	29349.7	33812.8	27155.5	35723.9	23282.4	28977.4	41487.9	0.172512	-2.53523	0.00448934
(3R,3aR,7aS)-3-Butylhexahydro-1(3H)-isobenzofuranone	C12H20O2	58390.6	36650.1	65737.9	57321.8	69636.9	59518	58123.4	29197.2	27940.5	21738.1	24724.3	20043	24863.5	22426.3	26799.7	21772.4	0.404677	-1.30516	0.00526746
cis-3-Hexenyl cis-3-hexenoate	C12H20O2	58390.6	36650.1	65737.9	57321.8	69636.9	59518	58123.4	29197.2	27940.5	21738.1	24724.3	20043	24863.5	22426.3	26799.7	21772.4	0.404677	-1.30516	0.00526746
cis-3-Hexenyl trans-2-hexenoate	C12H20O2	58390.6	36650.1	65737.9	57321.8	69636.9	59518	58123.4	29197.2	27940.5	21738.1	24724.3	20043	24863.5	22426.3	26799.7	21772.4	0.404677	-1.30516	0.00526746
6-Heptyl-5,6-dihydro-2H-pyran-2-one	C12H20O2	58390.6	36650.1	65737.9	57321.8	69636.9	59518	58123.4	29197.2	27940.5	21738.1	24724.3	20043	24863.5	22426.3	26799.7	21772.4	0.404677	-1.30516	0.00526746
3,7-Dimethyl-2Z,6-octadienyl acetate	C12H20O2	58390.6	36650.1	65737.9	57321.8	69636.9	59518	58123.4	29197.2	27940.5	21738.1	24724.3	20043	24863.5	22426.3	26799.7	21772.4	0.404677	-1.30516	0.00526746
Linalyl acetate	C12H20O2	58390.6	36650.1	65737.9	57321.8	69636.9	59518	58123.4	29197.2	27940.5	21738.1	24724.3	20043	24863.5	22426.3	26799.7	21772.4	0.404677	-1.30516	0.00526746
Fenchyl acetate	C12H20O2	58390.6	36650.1	65737.9	57321.8	69636.9	59518	58123.4	29197.2	27940.5	21738.1	24724.3	20043	24863.5	22426.3	26799.7	21772.4	0.404677	-1.30516	0.00526746
Isopulegol acetate	C12H20O2	58390.6	36650.1	65737.9	57321.8	69636.9	59518	58123.4	29197.2	27940.5	21738.1	24724.3	20043	24863.5	22426.3	26799.7	21772.4	0.404677	-1.30516	0.00526746
Dihydro-5-(2-octenyl)-2(3H)-furanone	C12H20O2	58390.6	36650.1	65737.9	57321.8	69636.9	59518	58123.4	29197.2	27940.5	21738.1	24724.3	20043	24863.5	22426.3	26799.7	21772.4	0.404677	-1.30516	0.00526746
Allyl cyclohexylpropionate	C12H20O2	58390.6	36650.1	65737.9	57321.8	69636.9	59518	58123.4	29197.2	27940.5	21738.1	24724.3	20043	24863.5	22426.3	26799.7	21772.4	0.404677	-1.30516	0.00526746
Methyl 2-undecynoate	C12H20O2	58390.6	36650.1	65737.9	57321.8	69636.9	59518	58123.4	29197.2	27940.5	21738.1	24724.3	20043	24863.5	22426.3	26799.7	21772.4	0.404677	-1.30516	0.00526746
(-)-Bornyl acetate	C12H20O2	58390.6	36650.1	65737.9	57321.8	69636.9	59518	58123.4	29197.2	27940.5	21738.1	24724.3	20043	24863.5	22426.3	26799.7	21772.4	0.404677	-1.30516	0.00526746
alpha-Terpinyl acetate	C12H20O2	58390.6	36650.1	65737.9	57321.8	69636.9	59518	58123.4	29197.2	27940.5	21738.1	24724.3	20043	24863.5	22426.3	26799.7	21772.4	0.404677	-1.30516	0.00526746
alpha-Campholene acetate	C12H20O2	58390.6	36650.1	65737.9	57321.8	69636.9	59518	58123.4	29197.2	27940.5	21738.1	24724.3	20043	24863.5	22426.3	26799.7	21772.4	0.404677	-1.30516	0.00526746
(Z)-4-Hydroxy-6-dodecenoic acid lactone	C12H20O2	58390.6	36650.1	65737.9	57321.8	69636.9	59518	58123.4	29197.2	27940.5	21738.1	24724.3	20043	24863.5	22426.3	26799.7	21772.4	0.404677	-1.30516	0.00526746
3,7-Dimethyl-2,6-octadien-1-ylacetate	C12H20O2	58390.6	36650.1	65737.9	57321.8	69636.9	59518	58123.4	29197.2	27940.5	21738.1	24724.3	20043	24863.5	22426.3	26799.7	21772.4	0.404677	-1.30516	0.00526746
ethyl 2E,4Z-decadienoate	C12H20O2	58390.6	36650.1	65737.9	57321.8	69636.9	59518	58123.4	29197.2	27940.5	21738.1	24724.3	20043	24863.5	22426.3	26799.7	21772.4	0.404677	-1.30516	0.00526746
Artemisia alcohol acetate	C12H20O2	58390.6	36650.1	65737.9	57321.8	69636.9	59518	58123.4	29197.2	27940.5	21738.1	24724.3	20043	24863.5	22426.3	26799.7	21772.4	0.404677	-1.30516	0.00526746
Dihydrocarveol acetate	C12H20O2	58390.6	36650.1	65737.9	57321.8	69636.9	59518	58123.4	29197.2	27940.5	21738.1	24724.3	20043	24863.5	22426.3	26799.7	21772.4	0.404677	-1.30516	0.00526746
(S)-Santolina acetate	C12H20O2	58390.6	36650.1	65737.9	57321.8	69636.9	59518	58123.4	29197.2	27940.5	21738.1	24724.3	20043	24863.5	22426.3	26799.7	21772.4	0.404677	-1.30516	0.00526746
cis-3-Hexenyl trans-4-hexenoate	C12H20O2	58390.6	36650.1	65737.9	57321.8	69636.9	59518	58123.4	29197.2	27940.5	21738.1	24724.3	20043	24863.5	22426.3	26799.7	21772.4	0.404677	-1.30516	0.00526746
p-Menth-1-en-9-ol acetate	C12H20O2	58390.6	36650.1	65737.9	57321.8	69636.9	59518	58123.4	29197.2	27940.5	21738.1	24724.3	20043	24863.5	22426.3	26799.7	21772.4	0.404677	-1.30516	0.00526746
Yuzu lactone	C12H20O2	58390.6	36650.1	65737.9	57321.8	69636.9	59518	58123.4	29197.2	27940.5	21738.1	24724.3	20043	24863.5	22426.3	26799.7	21772.4	0.404677	-1.30516	0.00526746
(1S,2R,4S)-(-)-Bornyl acetate	C12H20O2	58390.6	36650.1	65737.9	57321.8	69636.9	59518	58123.4	29197.2	27940.5	21738.1	24724.3	20043	24863.5	22426.3	26799.7	21772.4	0.404677	-1.30516	0.00526746
3,7-Dimethyl-2E,6-octadienyl acetate	C12H20O2	58390.6	36650.1	65737.9	57321.8	69636.9	59518	58123.4	29197.2	27940.5	21738.1	24724.3	20043	24863.5	22426.3	26799.7	21772.4	0.404677	-1.30516	0.00526746
Linalyl acetate	C12H20O2	58390.6	36650.1	65737.9	57321.8	69636.9	59518	58123.4	29197.2	27940.5	21738.1	24724.3	20043	24863.5	22426.3	26799.7	21772.4	0.404677	-1.30516	0.00526746
beta-Terpinyl acetate	C12H20O2	58390.6	36650.1	65737.9	57321.8	69636.9	59518	58123.4	29197.2	27940.5	21738.1	24724.3	20043	24863.5	22426.3	26799.7	21772.4	0.404677	-1.30516	0.00526746
gamma-Terpinyl acetate	C12H20O2	58390.6	36650.1	65737.9	57321.8	69636.9	59518	58123.4	29197.2	27940.5	21738.1	24724.3	20043	24863.5	22426.3	26799.7	21772.4	0.404677	-1.30516	0.00526746
(1R,2S,4R)-(+)-Bornyl acetate	C12H20O2	58390.6	36650.1	65737.9	57321.8	69636.9	59518	58123.4	29197.2	27940.5	21738.1	24724.3	20043	24863.5	22426.3	26799.7	21772.4	0.404677	-1.30516	0.00526746
8E-Hydroxy-4,8-dimethyl-4,9-decadienal	C12H20O2	58390.6	36650.1	65737.9	57321.8	69636.9	59518	58123.4	29197.2	27940.5	21738.1	24724.3	20043	24863.5	22426.3	26799.7	21772.4	0.404677	-1.30516	0.00526746
7Z,9-Decadienyl acetate	C12H20O2	58390.6	36650.1	65737.9	57321.8	69636.9	59518	58123.4	29197.2	27940.5	21738.1	24724.3	20043	24863.5	22426.3	26799.7	21772.4	0.404677	-1.30516	0.00526746
3E,5E-Decadienyl acetate	C12H20O2	58390.6	36650.1	65737.9	57321.8	69636.9	59518	58123.4	29197.2	27940.5	21738.1	24724.3	20043	24863.5	22426.3	26799.7	21772.4	0.404677	-1.30516	0.00526746
3Z,5E-Decadienyl acetate	C12H20O2	58390.6	36650.1	65737.9	57321.8	69636.9	59518	58123.4	29197.2	27940.5	21738.1	24724.3	20043	24863.5	22426.3	26799.7	21772.4	0.404677	-1.30516	0.00526746
Isopropyl 2,4-dimethyl-2E,4E-heptadienoate	C12H20O2	58390.6	36650.1	65737.9	57321.8	69636.9	59518	58123.4	29197.2	27940.5	21738.1	24724.3	20043	24863.5	22426.3	26799.7	21772.4	0.404677	-1.30516	0.00526746
(E)-2-Hexenyl (E)-2-hexenoate	C12H20O2	58390.6	36650.1	65737.9	57321.8	69636.9	59518	58123.4	29197.2	27940.5	21738.1	24724.3	20043	24863.5	22426.3	26799.7	21772.4	0.404677	-1.30516	0.00526746
(E)-2-Hexenyl (Z)-3-hexenoate	C12H20O2	58390.6	36650.1	65737.9	57321.8	69636.9	59518	58123.4	29197.2	27940.5	21738.1	24724.3	20043	24863.5	22426.3	26799.7	21772.4	0.404677	-1.30516	0.00526746
Ethyl (E)-7,9-decadienoate	C12H20O2	58390.6	36650.1	65737.9	57321.8	69636.9	59518	58123.4	29197.2	27940.5	21738.1	24724.3	20043	24863.5	22426.3	26799.7	21772.4	0.404677	-1.30516	0.00526746
Buibuilactone	C12H20O2	58390.6	36650.1	65737.9	57321.8	69636.9	59518	58123.4	29197.2	27940.5	21738.1	24724.3	20043	24863.5	22426.3	26799.7	21772.4	0.404677	-1.30516	0.00526746
Cucujolide II	C12H20O2	58390.6	36650.1	65737.9	57321.8	69636.9	59518	58123.4	29197.2	27940.5	21738.1	24724.3	20043	24863.5	22426.3	26799.7	21772.4	0.404677	-1.30516	0.00526746
Cucujolide VIII	C12H20O2	58390.6	36650.1	65737.9	57321.8	69636.9	59518	58123.4	29197.2	27940.5	21738.1	24724.3	20043	24863.5	22426.3	26799.7	21772.4	0.404677	-1.30516	0.00526746
S-Cucujolide II	C12H20O2	58390.6	36650.1	65737.9	57321.8	69636.9	59518	58123.4	29197.2	27940.5	21738.1	24724.3	20043	24863.5	22426.3	26799.7	21772.4	0.404677	-1.30516	0.00526746
5-Dodecen-11-olide	C12H20O2	58390.6	36650.1	65737.9	57321.8	69636.9	59518	58123.4	29197.2	27940.5	21738.1	24724.3	20043	24863.5	22426.3	26799.7	21772.4	0.404677	-1.30516	0.00526746
9-dodecynoic acid	C12H20O2	58390.6	36650.1	65737.9	57321.8	69636.9	59518	58123.4	29197.2	27940.5	21738.1	24724.3	20043	24863.5	22426.3	26799.7	21772.4	0.404677	-1.30516	0.00526746
8-dodecynoic acid	C12H20O2	58390.6	36650.1	65737.9	57321.8	69636.9	59518	58123.4	29197.2	27940.5	21738.1	24724.3	20043	24863.5	22426.3	26799.7	21772.4	0.404677	-1.30516	0.00526746
7-dodecynoic acid	C12H20O2	58390.6	36650.1	65737.9	57321.8	69636.9	59518	58123.4	29197.2	27940.5	21738.1	24724.3	20043	24863.5	22426.3	26799.7	21772.4	0.404677	-1.30516	0.00526746
6-dodecynoic acid	C12H20O2	58390.6	36650.1	65737.9	57321.8	69636.9	59518	58123.4	29197.2	27940.5	21738.1	24724.3	20043	24863.5	22426.3	26799.7	21772.4	0.404677	-1.30516	0.00526746
5-dodecynoic acid	C12H20O2	58390.6	36650.1	65737.9	57321.8	69636.9	59518	58123.4	29197.2	27940.5	21738.1	24724.3	20043	24863.5	22426.3	26799.7	21772.4	0.404677	-1.30516	0.00526746
4-dodecynoic acid	C12H20O2	58390.6	36650.1	65737.9	57321.8	69636.9	59518	58123.4	29197.2	27940.5	21738.1	24724.3	20043	24863.5	22426.3	26799.7	21772.4	0.404677	-1.30516	0.00526746
3-dodecynoic acid	C12H20O2	58390.6	36650.1	65737.9	57321.8	69636.9	59518	58123.4	29197.2	27940.5	21738.1	24724.3	20043	24863.5	22426.3	26799.7	21772.4	0.404677	-1.30516	0.00526746
11-dodecynoic acid	C12H20O2	58390.6	36650.1	65737.9	57321.8	69636.9	59518	58123.4	29197.2	27940.5	21738.1	24724.3	20043	24863.5	22426.3	26799.7	21772.4	0.404677	-1.30516	0.00526746
10-dodecynoic acid	C12H20O2	58390.6	36650.1	65737.9	57321.8	69636.9	59518	58123.4	29197.2	27940.5	21738.1	24724.3	20043	24863.5	22426.3	26799.7	21772.4	0.404677	-1.30516	0.00526746
cis,cis-dodeca-3,6-dienoic acid	C12H20O2	58390.6	36650.1	65737.9	57321.8	69636.9	59518	58123.4	29197.2	27940.5	21738.1	24724.3	20043	24863.5	22426.3	26799.7	21772.4	0.404677	-1.30516	0.00526746
2E,4E-dodecadienoic acid	C12H20O2	58390.6	36650.1	65737.9	57321.8	69636.9	59518	58123.4	29197.2	27940.5	21738.1	24724.3	20043	24863.5	22426.3	26799.7	21772.4	0.404677	-1.30516	0.00526746
2Z,8E-dodecadienoic acid	C12H20O2	58390.6	36650.1	65737.9	57321.8	69636.9	59518	58123.4	29197.2	27940.5	21738.1	24724.3	20043	24863.5	22426.3	26799.7	21772.4	0.404677	-1.30516	0.00526746
2E,8Z-dodecadienoic acid	C12H20O2	58390.6	36650.1	65737.9	57321.8	69636.9	59518	58123.4	29197.2	27940.5	21738.1	24724.3	20043	24863.5	22426.3	26799.7	21772.4	0.404677	-1.30516	0.00526746
2E,8E-dodecadienoic acid	C12H20O2	58390.6	36650.1	65737.9	57321.8	69636.9	59518	58123.4	29197.2	27940.5	21738.1	24724.3	20043	24863.5	22426.3	26799.7	21772.4	0.404677	-1.30516	0.00526746
2E,6Z-dodecadienoic acid	C12H20O2	58390.6	36650.1	65737.9	57321.8	69636.9	59518	58123.4	29197.2	27940.5	21738.1	24724.3	20043	24863.5	22426.3	26799.7	21772.4	0.404677	-1.30516	0.00526746
8E,10E-dodecadienoic acid	C12H20O2	58390.6	36650.1	65737.9	57321.8	69636.9	59518	58123.4	29197.2	27940.5	21738.1	24724.3	20043	24863.5	22426.3	26799.7	21772.4	0.404677	-1.30516	0.00526746
7Z,9E-dodecadienoic acid	C12H20O2	58390.6	36650.1	65737.9	57321.8	69636.9	59518	58123.4	29197.2	27940.5	21738.1	24724.3	20043	24863.5	22426.3	26799.7	21772.4	0.404677	-1.30516	0.00526746
5E,7E-dodecadienoic acid	C12H20O2	58390.6	36650.1	65737.9	57321.8	69636.9	59518	58123.4	29197.2	27940.5	21738.1	24724.3	20043	24863.5	22426.3	26799.7	21772.4	0.404677	-1.30516	0.00526746
2Z,8Z-dodecadienoic acid	C12H20O2	58390.6	36650.1	65737.9	57321.8	69636.9	59518	58123.4	29197.2	27940.5	21738.1	24724.3	20043	24863.5	22426.3	26799.7	21772.4	0.404677	-1.30516	0.00526746
8Z,10E-dodecadienoic acid	C12H20O2	58390.6	36650.1	65737.9	57321.8	69636.9	59518	58123.4	29197.2	27940.5	21738.1	24724.3	20043	24863.5	22426.3	26799.7	21772.4	0.404677	-1.30516	0.00526746
Aleprylic acid	C12H20O2	58390.6	36650.1	65737.9	57321.8	69636.9	59518	58123.4	29197.2	27940.5	21738.1	24724.3	20043	24863.5	22426.3	26799.7	21772.4	0.404677	-1.30516	0.00526746
3R-hydroxy-hexanoic acid	C6H12O3	202274	237681	257716	213396	309933	338272	241916	120140	157992	93043.1	100576	91796.9	100394	113636	91022.1	112151	0.41904	-1.25484	0.00711298
5R-hydroxy-hexanoic acid	C6H12O3	202274	237681	257716	213396	309933	338272	241916	120140	157992	93043.1	100576	91796.9	100394	113636	91022.1	112151	0.41904	-1.25484	0.00711298
5-hydroxy caproic acid	C6H12O3	202274	237681	257716	213396	309933	338272	241916	120140	157992	93043.1	100576	91796.9	100394	113636	91022.1	112151	0.41904	-1.25484	0.00711298
D-Leucic acid	C6H12O3	202274	237681	257716	213396	309933	338272	241916	120140	157992	93043.1	100576	91796.9	100394	113636	91022.1	112151	0.41904	-1.25484	0.00711298
Leucinic acid	C6H12O3	202274	237681	257716	213396	309933	338272	241916	120140	157992	93043.1	100576	91796.9	100394	113636	91022.1	112151	0.41904	-1.25484	0.00711298
hydroxy-isocaproic acid	C6H12O3	202274	237681	257716	213396	309933	338272	241916	120140	157992	93043.1	100576	91796.9	100394	113636	91022.1	112151	0.41904	-1.25484	0.00711298
2-hydroxy-3-methyl-pentanoic acid	C6H12O3	202274	237681	257716	213396	309933	338272	241916	120140	157992	93043.1	100576	91796.9	100394	113636	91022.1	112151	0.41904	-1.25484	0.00711298
4,4-Dimethoxy-2-butanone	C6H12O3	202274	237681	257716	213396	309933	338272	241916	120140	157992	93043.1	100576	91796.9	100394	113636	91022.1	112151	0.41904	-1.25484	0.00711298
Threo-3-Hydroxy-2-methylbutyric acid	C6H12O3	202274	237681	257716	213396	309933	338272	241916	120140	157992	93043.1	100576	91796.9	100394	113636	91022.1	112151	0.41904	-1.25484	0.00711298
2-ethyl-2-hydroxy-butyric acid	C6H12O3	202274	237681	257716	213396	309933	338272	241916	120140	157992	93043.1	100576	91796.9	100394	113636	91022.1	112151	0.41904	-1.25484	0.00711298
DL-2-hydroxy caproic acid	C6H12O3	202274	237681	257716	213396	309933	338272	241916	120140	157992	93043.1	100576	91796.9	100394	113636	91022.1	112151	0.41904	-1.25484	0.00711298
Ethyl (±)-3-hydroxybutyrate	C6H12O3	202274	237681	257716	213396	309933	338272	241916	120140	157992	93043.1	100576	91796.9	100394	113636	91022.1	112151	0.41904	-1.25484	0.00711298
2-Methyl-3-hydroxyvaleric acid	C6H12O3	202274	237681	257716	213396	309933	338272	241916	120140	157992	93043.1	100576	91796.9	100394	113636	91022.1	112151	0.41904	-1.25484	0.00711298
(+/-)-1-Acetoxy-1-ethoxyethane	C6H12O3	202274	237681	257716	213396	309933	338272	241916	120140	157992	93043.1	100576	91796.9	100394	113636	91022.1	112151	0.41904	-1.25484	0.00711298
6-Hydroxyhexanoic acid	C6H12O3	202274	237681	257716	213396	309933	338272	241916	120140	157992	93043.1	100576	91796.9	100394	113636	91022.1	112151	0.41904	-1.25484	0.00711298
DL-3-hydroxy caproic acid	C6H12O3	202274	237681	257716	213396	309933	338272	241916	120140	157992	93043.1	100576	91796.9	100394	113636	91022.1	112151	0.41904	-1.25484	0.00711298
Butoxyacetic acid	C6H12O3	202274	237681	257716	213396	309933	338272	241916	120140	157992	93043.1	100576	91796.9	100394	113636	91022.1	112151	0.41904	-1.25484	0.00711298
Paraldehyde	C6H12O3	202274	237681	257716	213396	309933	338272	241916	120140	157992	93043.1	100576	91796.9	100394	113636	91022.1	112151	0.41904	-1.25484	0.00711298
Ethyl (R)-3-hydroxybutanoate	C6H12O3	202274	237681	257716	213396	309933	338272	241916	120140	157992	93043.1	100576	91796.9	100394	113636	91022.1	112151	0.41904	-1.25484	0.00711298
DL-4-hydroxy caproic acid	C6H12O3	202274	237681	257716	213396	309933	338272	241916	120140	157992	93043.1	100576	91796.9	100394	113636	91022.1	112151	0.41904	-1.25484	0.00711298
