# Supplementary material for: Integrated Metabolomics and Proteomics Dynamics of Serum Samples Reveals Dietary Zeolite Clinoptilolite Supplementation Restores Energy Balance in High Yielding Dairy Cows
Source: Metabolites. 2021 Dec 5;11(12):842. doi: 10.3390/metabo11120842 (PMC8705350; doi:10.3390/metabo11120842)
Supplement: Supplementary file 1 [file metabolites-11-00842-s001.zip › supplementary files/Supplementary Table S5.xlsx]

## Sheet: 30pre-S vs. 30pre-C
	List of significant proteins based on fc and q values between 30pre-S vs. 30pre-C
Accession	Description	X..Peptides	30pre-C1	30pre-C2	30pre-C3	30pre-C4	30pre-C5	30pre-C6	30pre-C7	30pre-C8	median c	30pre-S1	30pre-S2	30pre-S3	30pre-S4	30pre-S5	30pre-S6	30pre-S7	30pre-S8	median s	fc	log fc	q
Q28921	Alpha 1-antichymotrypsin (Fragment) OS=Bos taurus OX=9913 GN=alpha 1-antichymotrypsin/ ACT PE=2 SV=1	4	1.056	1.421	1.04	0.975	1.012	1.182	1.068	1.386	1.062	1.122	0.633	0.772	0.921	0.67	0.897	1.16	0.827	0.862	0.811676	-0.301024	0.0388057
Q27983	Alpha1-antichymotrypsin isoform pHHK11 (Fragment) OS=Bos taurus OX=9913 PE=2 SV=1	3	1.053	1.421	1.04	0.975	1.012	1.182	1.068	1.386	1.0605	1.121	0.633	0.771	0.921	0.67	0.897	1.16	0.827	0.862	0.812824	-0.298985	0.0388057
P34955	Alpha-1-antiproteinase OS=Bos taurus OX=9913 GN=SERPINA1 PE=1 SV=1	3	1.322	1.067	1.156	1.112	0.923	1.034	1.098	0.94	1.0825	1.068	0.72	0.866	0.861	0.855	0.826	1.068	0.872	0.8635	0.797691	-0.326099	0.0332785
Q2KJF1	Alpha-1B-glycoprotein OS=Bos taurus OX=9913 GN=A1BG PE=1 SV=1	17	1.247	1.22	1.093	1.041	1.101	1.013	1.199	0.901	1.097	1.097	0.757	0.862	0.818	0.759	0.937	1.095	0.88	0.871	0.793984	-0.332819	0.0297119
P28800	Alpha-2-antiplasmin OS=Bos taurus OX=9913 GN=SERPINF2 PE=1 SV=2	6	1.271	1.009	1.058	1.026	0.952	1	1.219	1.081	1.042	1.05	0.722	0.845	0.846	0.762	0.926	0.966	0.841	0.8455	0.81142	-0.301479	0.012553
Q3SZH5	Angiotensinogen OS=Bos taurus OX=9913 GN=AGT PE=1 SV=1	5	1.36	0.934	1.223	1.016	1.309	1.167	1.157	1.025	1.162	1.085	0.876	0.994	1.179	0.735	0.728	0.94	0.814	0.908	0.781411	-0.355846	0.0382853
P41361	Antithrombin-III OS=Bos taurus OX=9913 GN=SERPINC1 PE=1 SV=2	3	1.305	1.298	1.076	1.116	1.056	1.063	1.249	0.944	1.096	0.921	0.954	0.936	0.783	0.995	1.016	1.143	0.808	0.945	0.862226	-0.213862	0.0312901
Q28065	C4b-binding protein alpha chain OS=Bos taurus OX=9913 GN=C4BPA PE=2 SV=1	4	1.199	1.253	1.114	1.105	1.304	1.034	1.179	0.912	1.1465	1.08	0.747	0.938	0.796	0.873	0.857	1.076	0.812	0.865	0.75447	-0.406464	0.012553
Q2KIG3	Carboxypeptidase B2 OS=Bos taurus OX=9913 GN=CPB2 PE=1 SV=1	2	1.308	1.043	1.182	1.176	1.055	1.117	1.139	1.061	1.128	0.911	0.862	0.902	0.846	1.033	0.903	1.026	0.754	0.9025	0.800089	-0.321768	0.00802739
P00741	Coagulation factor IX OS=Bos taurus OX=9913 GN=F9 PE=1 SV=2	3	1.088	NA	1.296	NA	NA	1.232	1.248	1.215	1.232	1.175	0.691	0.935	0.893	0.908	0.914	NA	0.928	0.914	0.741883	-0.430736	0.0102536
Q2KIV9	Complement C1q subcomponent subunit B OS=Bos taurus OX=9913 GN=C1QB PE=1 SV=1	4	1.489	1.178	1.503	1.018	1.212	1.146	0.985	NA	1.178	1.227	0.801	0.656	0.782	0.981	1.021	0.929	0.964	0.9465	0.80348	-0.315665	0.0388057
A5D9E9	Complement C1r subcomponent precursor OS=Bos taurus OX=9913 GN=C1R PE=2 SV=1	5	NA	1.175	1.222	1.14	1.079	NA	1.039	1.024	1.1095	NA	0.792	NA	0.926	1.01	0.696	0.893	0.878	0.8855	0.798107	-0.325345	0.012553
Q2UVX4	Complement C3 OS=Bos taurus OX=9913 GN=C3 PE=1 SV=2	37	1.196	1.346	1.078	1.127	1.339	1.064	1.241	0.999	1.1615	0.966	0.735	0.819	0.965	0.847	1.007	0.989	0.714	0.906	0.780026	-0.358406	0.00843246
G3X7A5	Complement C3 OS=Bos taurus OX=9913 GN=C3 PE=4 SV=1	36	1.196	1.346	1.077	1.125	1.339	1.064	1.241	1.001	1.1605	0.966	0.733	0.819	0.965	0.847	1.007	0.991	0.714	0.906	0.780698	-0.357164	0.00843246
P01030	Complement C4 (Fragments) OS=Bos taurus OX=9913 GN=C4 PE=1 SV=2	15	0.811	1.251	1.066	NA	1.423	NA	1.16	1.032	1.113	1.042	0.567	NA	0.769	0.872	0.567	NA	0.873	0.8205	0.737197	-0.439878	0.0459644
P12082	Complement C5a anaphylatoxin OS=Bos taurus OX=9913 GN=C5 PE=1 SV=1	1	NA	0.959	1.177	1.19	1.22	1.068	1.155	1.042	1.155	NA	0.667	0.86	0.784	0.887	0.935	1.128	0.721	0.86	0.744589	-0.425484	0.0164787
F1MY85	Complement C5a anaphylatoxin OS=Bos taurus OX=9913 GN=C5 PE=1 SV=2	21	1.263	1.428	1.143	1.097	1.275	1.1	1.103	1.073	1.123	1.05	0.727	0.834	0.906	0.83	1.067	1.053	0.822	0.87	0.774711	-0.368271	0.00950243
F1MX87	Complement C8 alpha chain OS=Bos taurus OX=9913 GN=C8A PE=4 SV=1	7	1.362	1.167	1.202	0.966	1.251	1.062	1.272	0.875	1.1845	1.092	0.804	0.876	0.862	0.848	0.876	1.02	0.8	0.869	0.733643	-0.44685	0.018187
F1N102	Complement C8 beta chain OS=Bos taurus OX=9913 GN=C8B PE=4 SV=2	5	1.223	1.199	1.037	1.106	1.392	1.089	1.185	1.181	1.183	1.093	0.673	0.86	0.919	0.909	0.996	1.072	0.814	0.914	0.772612	-0.372184	0.0102536
F1MX86	Complement C8 beta chain OS=Bos taurus OX=9913 GN=C8B PE=4 SV=2	3	1.217	1.232	1.103	1.15	1.446	1.08	1.219	1.127	1.1835	1.139	0.667	0.876	0.913	0.934	1.017	1.089	0.824	0.9235	0.780313	-0.357876	0.012553
O97941	Complement component 3 (Fragment) OS=Bos taurus OX=9913 PE=2 SV=1	4	1.178	1.361	1.052	1.103	1.364	1.031	1.171	0.979	1.137	1	0.698	0.872	0.956	0.847	0.977	0.964	0.783	0.914	0.80387	-0.314966	0.0102536
A0A0F6QNP7	Complement component 3 OS=Bos taurus OX=9913 GN=C3 PE=2 SV=1	37	1.196	1.346	1.078	1.127	1.339	1.064	1.241	0.999	1.1615	0.966	0.735	0.819	0.965	0.847	1.007	0.989	0.714	0.906	0.780026	-0.358406	0.00843246
Q693V9	Complement component 3d (Fragment) OS=Bos taurus OX=9913 PE=2 SV=1	8	1.154	1.265	1.04	1.143	1.335	1.043	1.304	1.005	1.1485	0.979	0.736	0.832	0.914	0.906	1.025	0.979	0.73	0.91	0.792338	-0.335812	0.00843246
A5D9D2	Complement component 4 binding protein, alpha chain OS=Bos taurus OX=9913 GN=C4BPA PE=2 SV=1	5	1.259	1.264	1.071	1.164	1.296	1.147	1.248	0.867	1.206	1.088	0.856	0.963	0.783	0.873	0.785	1.133	0.812	0.8645	0.716833	-0.480292	0.0142442
A0A0F6QMJ3	Complement component 5 OS=Bos taurus OX=9913 GN=C5 PE=2 SV=1	20	1.26	1.437	1.143	1.097	1.28	1.1	1.103	1.073	1.123	1.046	0.727	0.834	0.906	0.83	1.067	1.053	0.822	0.87	0.774711	-0.368271	0.00950243
Q1JPD0	Complement component 8, alpha polypeptide (Fragment) OS=Bos taurus OX=9913 GN=C8A PE=2 SV=1	2	1.389	1.152	NA	0.953	1.233	1.003	1.2	0.945	1.152	1.092	0.694	0.866	NA	0.782	0.904	0.959	0.8	0.866	0.751736	-0.411702	0.0332785
Q2KIH5	Complement component 8, alpha polypeptide OS=Bos taurus OX=9913 GN=C8A PE=2 SV=1	6	1.362	1.167	1.202	0.966	1.251	1.061	1.272	0.912	1.1845	1.092	0.804	0.882	0.862	0.848	0.876	1.02	0.8	0.869	0.733643	-0.44685	0.0141112
Q2KIK9	Complement component 8, beta polypeptide OS=Bos taurus OX=9913 GN=C8B PE=2 SV=1	3	1.217	1.232	1.103	1.15	1.446	1.08	1.219	1.127	1.1835	1.139	0.667	0.876	0.913	0.934	1.017	1.089	0.824	0.9235	0.780313	-0.357876	0.012553
Q1A7A4	Complement component C5a (Fragment) OS=Bos taurus OX=9913 PE=2 SV=1	1	NA	0.959	1.177	1.19	1.22	1.068	1.155	1.042	1.155	NA	0.667	0.86	0.784	0.887	0.935	1.128	0.721	0.86	0.744589	-0.425484	0.0164787
Q29RU4	Complement component C6 OS=Bos taurus OX=9913 GN=C6 PE=2 SV=1	10	1.153	1.117	0.881	1.178	1.096	0.944	0.934	1.113	1.1045	0.95	0.853	0.842	0.83	0.816	0.923	1.077	0.708	0.8475	0.767316	-0.382108	0.0297119
F1MM86	Complement component C6 OS=Bos taurus OX=9913 GN=C6 PE=4 SV=1	10	1.153	1.117	0.881	1.178	1.096	0.944	0.934	1.113	1.1045	0.95	0.853	0.842	0.83	0.816	0.923	1.077	0.708	0.8475	0.767316	-0.382108	0.0297119
Q29RQ1	Complement component C7 OS=Bos taurus OX=9913 GN=C7 PE=2 SV=1	8	1.041	0.984	0.9	1.065	0.964	0.94	1.03	1.162	1.007	1.013	0.675	0.631	0.876	0.906	0.775	0.986	0.819	0.8475	0.841609	-0.248778	0.0371171
Q3MHN2	Complement component C9 OS=Bos taurus OX=9913 GN=C9 PE=2 SV=1	7	1.21	1.201	1.032	1.017	1.22	1.065	0.991	1.469	1.133	1.119	0.752	0.886	0.834	0.74	0.807	0.848	0.746	0.8205	0.724184	-0.465573	0.00950243
Q28085	Complement factor H OS=Bos taurus OX=9913 GN=CFH PE=1 SV=3	22	1.14	1.192	1.037	1.004	1.215	1.236	1.188	1.001	1.164	1.193	0.805	0.844	0.887	0.887	0.943	1.084	0.86	0.887	0.762027	-0.392085	0.0297119
F1N4M7	Complement factor I OS=Bos taurus OX=9913 GN=CFI PE=1 SV=2	7	1.267	1.276	1.139	1.019	1.36	1.061	1.212	1.197	1.2045	1.094	0.763	0.777	0.871	0.898	0.893	0.983	0.847	0.882	0.732254	-0.449584	0.00586218
Q32PI4	Complement factor I OS=Bos taurus OX=9913 GN=CFI PE=2 SV=1	7	1.267	1.276	1.139	1.019	1.36	1.061	1.212	1.197	1.2045	1.094	0.763	0.777	0.871	0.898	0.893	0.983	0.847	0.882	0.732254	-0.449584	0.00586218
Q32P72	CP protein (Fragment) OS=Bos taurus OX=9913 GN=CP PE=2 SV=1	1	1.16	1.484	0.999	NA	1.104	NA	1.401	NA	1.16	1.022	0.705	NA	1.09	0.531	0.927	NA	0.758	0.8425	0.726293	-0.461376	0.0449171
B8Y9T0	Cumulus cell-specific fibronectin 1 transcript variant OS=Bos taurus OX=9913 GN=FN1 PE=2 SV=1	28	1.363	1.082	1.158	1.18	1.081	1.1	1.258	1.09	1.129	1.086	0.845	0.859	0.909	0.903	1.007	1.165	0.798	0.906	0.80248	-0.317463	0.0128935
A5PJT7	ECM1 protein OS=Bos taurus OX=9913 GN=ECM1 PE=2 SV=1	6	1.142	1.494	0.968	0.916	1.354	1.394	1.13	1.406	1.248	0.959	0.643	0.722	1.079	0.681	0.953	1.014	0.788	0.8705	0.697516	-0.519702	0.012553
B8Y9S9	Embryo-specific fibronectin 1 transcript variant OS=Bos taurus OX=9913 GN=FN1 PE=2 SV=1	29	1.363	1.082	1.158	1.186	1.081	1.1	1.258	1.09	1.129	1.086	0.845	0.859	0.909	0.903	1.007	1.163	0.798	0.906	0.80248	-0.317463	0.012553
P50448	Factor XIIa inhibitor OS=Bos taurus OX=9913 PE=1 SV=1	5	1.192	1.252	1.112	1.229	1.235	1.223	1.225	1.062	1.224	1.128	0.844	0.87	0.871	0.832	0.91	0.995	0.797	0.8705	0.711193	-0.491687	0.00559981
E1BMJ0	Factor XIIa inhibitor precursor OS=Bos taurus OX=9913 GN=SERPING1 PE=3 SV=2	4	1.192	1.252	1.112	1.229	1.235	1.223	1.225	1.041	1.224	1.128	0.844	0.87	0.871	0.832	0.91	0.995	0.797	0.8705	0.711193	-0.491687	0.00559981
P02672	Fibrinogen alpha chain OS=Bos taurus OX=9913 GN=FGA PE=1 SV=5	4	1.134	1.092	0.985	1.041	1.033	1.032	1.099	1.382	1.0665	0.943	0.626	0.797	0.905	0.837	0.962	0.961	0.782	0.871	0.81669	-0.292139	0.0102536
A5PJE3	Fibrinogen alpha chain OS=Bos taurus OX=9913 GN=FGA PE=2 SV=1	4	1.134	1.092	0.985	1.041	1.033	1.032	1.099	1.382	1.0665	0.943	0.626	0.797	0.905	0.837	0.962	0.961	0.782	0.871	0.81669	-0.292139	0.0102536
Q71U44	Fibronectin (Fragment) OS=Bos taurus OX=9913 PE=2 SV=1	5	1.276	1.112	1.161	1.181	0.964	1.096	1.175	1.188	1.168	1.136	0.95	0.853	1.064	0.923	0.963	1.104	0.807	0.9565	0.818921	-0.288203	0.0297119
P07589	Fibronectin OS=Bos taurus OX=9913 GN=FN1 PE=1 SV=4	29	1.363	1.082	1.158	1.186	1.081	1.1	1.258	1.09	1.129	1.086	0.845	0.859	0.909	0.903	1.007	1.163	0.798	0.906	0.80248	-0.317463	0.012553
G5E5A9	Fibronectin OS=Bos taurus OX=9913 GN=FN1 PE=4 SV=1	29	1.363	1.082	1.158	1.186	1.081	1.1	1.258	1.09	1.129	1.086	0.845	0.859	0.909	0.903	1.007	1.163	0.798	0.906	0.80248	-0.317463	0.012553
P37141	Glutathione peroxidase 3 OS=Bos taurus OX=9913 GN=GPX3 PE=2 SV=2	3	1.025	0.997	0.869	1.155	1.003	1.038	0.941	1.287	1.014	0.919	0.669	0.744	0.901	0.715	0.752	0.826	0.706	0.748	0.737673	-0.438947	0.00843246
G3X8D7	Glutathione peroxidase OS=Bos taurus OX=9913 GN=GPX3 PE=3 SV=1	3	1.025	0.997	0.869	1.155	1.003	1.038	0.941	1.287	1.014	0.919	0.669	0.744	0.901	0.715	0.752	0.826	0.706	0.748	0.737673	-0.438947	0.00843246
Q3SZV7	Hemopexin OS=Bos taurus OX=9913 GN=HPX PE=2 SV=1	7	1.095	1.128	1.018	1.116	1.166	1.023	1.163	1.012	1.1055	1.054	0.735	0.927	0.844	0.756	0.891	1.078	0.73	0.8675	0.784713	-0.349763	0.0142442
Q09TE3	Insulin-like growth factor binding protein acid labile subunit OS=Bos taurus OX=9913 PE=2 SV=1	4	1.361	1.101	1.183	1.116	1.126	1.106	1.084	0.882	1.111	1.082	0.765	0.859	0.888	0.876	0.82	1.027	0.729	0.8675	0.780828	-0.356923	0.012553
M5FKF4	Insulin-like growth factor binding protein, acid labile subunit OS=Bos taurus OX=9913 GN=IGFALS PE=4 SV=1	4	1.361	1.101	1.183	1.116	1.126	1.106	1.084	0.882	1.111	1.082	0.765	0.859	0.888	0.876	0.82	1.027	0.729	0.8675	0.780828	-0.356923	0.012553
Q5EA67	Inter-alpha (Globulin) inhibitor H4 (Plasma Kallikrein-sensitive glycoprotein) OS=Bos taurus OX=9913 GN=ITIH4 PE=2 SV=1	11	1.119	1.242	0.86	0.841	1.187	1.296	1.133	1.505	1.16	0.963	0.607	0.667	0.875	0.764	0.777	0.845	0.781	0.779	0.671552	-0.57443	0.012553
P56652	Inter-alpha-trypsin inhibitor heavy chain H3 OS=Bos taurus OX=9913 GN=ITIH3 PE=1 SV=2	2	1.144	1.184	1.337	1.154	1.16	1.284	0.925	1.081	1.157	0.922	0.672	0.925	0.829	0.761	0.792	1.151	0.779	0.8105	0.700519	-0.513505	0.00867728
Q3T052	Inter-alpha-trypsin inhibitor heavy chain H4 OS=Bos taurus OX=9913 GN=ITIH4 PE=1 SV=1	11	1.119	1.242	0.86	0.841	1.187	1.296	1.133	1.505	1.16	0.963	0.607	0.667	0.875	0.764	0.777	0.845	0.781	0.779	0.671552	-0.57443	0.012553
F1MMD7	Inter-alpha-trypsin inhibitor heavy chain H4 OS=Bos taurus OX=9913 GN=ITIH4 PE=4 SV=2	11	1.119	1.242	0.86	0.841	1.187	1.296	1.133	1.505	1.16	0.963	0.607	0.667	0.875	0.764	0.777	0.845	0.781	0.779	0.671552	-0.57443	0.012553
P01045	Kininogen-2 OS=Bos taurus OX=9913 GN=KNG2 PE=1 SV=1	5	1.45	1.159	1.157	1.269	1.146	0.94	1.159	1.01	1.158	0.948	1.067	0.916	0.882	0.84	1.079	1.159	0.762	0.932	0.804836	-0.313233	0.0459644
Q2KIF2	Leucine-rich alpha-2-glycoprotein 1 OS=Bos taurus OX=9913 GN=LRG1 PE=1 SV=1	5	1.254	1.289	1.132	1.088	1.136	1.024	1.034	1.124	1.128	1.083	1.082	0.962	0.822	0.979	0.859	1.003	0.744	0.9705	0.860372	-0.216967	0.017811
P06868	Plasminogen OS=Bos taurus OX=9913 GN=PLG PE=1 SV=2	11	1.22	1.192	1.034	0.99	1.151	1.117	1.183	1.245	1.167	1.084	0.735	0.829	0.923	0.643	0.877	1.036	0.813	0.853	0.730934	-0.452187	0.00950243
P00735	Prothrombin OS=Bos taurus OX=9913 GN=F2 PE=1 SV=2	16	1.328	1.147	1.169	1.234	1.043	1.03	1.163	1.071	1.155	1.09	0.692	0.95	0.899	0.797	0.936	1.083	0.789	0.9175	0.794372	-0.332113	0.012553
Q29443	Serotransferrin OS=Bos taurus OX=9913 GN=TF PE=2 SV=1	13	1.345	1.026	1.36	1.226	1.168	1.014	1.025	1.098	1.133	1.029	0.756	0.871	0.822	0.863	0.928	0.961	0.769	0.867	0.765225	-0.386044	0.00843246
Q9TTE1	Serpin A3-1 OS=Bos taurus OX=9913 GN=SERPINA3-1 PE=1 SV=3	6	1.075	1.435	1.079	0.974	1.047	1.183	1.063	1.378	1.077	1.127	0.64	0.785	0.931	0.655	0.917	1.149	0.817	0.867	0.805014	-0.312914	0.0332785
A2I7M9	Serpin A3-2 OS=Bos taurus OX=9913 GN=SERPINA3-2 PE=3 SV=1	5	1.072	1.435	1.079	0.974	1.047	1.183	1.063	1.378	1.0755	1.126	0.64	0.784	0.931	0.655	0.917	1.149	0.817	0.867	0.806137	-0.310904	0.0332785
A6QPQ2	Serpin A3-8 OS=Bos taurus OX=9913 GN=SERPINA3-8 PE=2 SV=1	2	1.313	1.268	1.064	0.838	1.258	1.345	1.142	1.195	1.2265	1.274	0.683	0.698	1.077	0.619	0.94	0.962	0.789	0.8645	0.704851	-0.504609	0.0371171
A0A0A0MP89	Serpin A3-8 OS=Bos taurus OX=9913 GN=SERPINA3-8 PE=3 SV=1	2	1.313	1.268	1.064	0.838	1.258	1.345	1.142	1.195	1.2265	1.274	0.683	0.698	1.077	0.619	0.94	0.962	0.789	0.8645	0.704851	-0.504609	0.0371171
A5PJ69	SERPINA10 protein OS=Bos taurus OX=9913 GN=SERPINA10 PE=2 SV=1	7	1.392	1.162	1.248	1.159	1.321	1.11	1.093	0.9	1.1605	1.033	0.851	1.013	0.905	0.839	0.922	1.223	0.765	0.9135	0.787161	-0.34527	0.0328189
Q28194	Thrombospondin-1 (Fragment) OS=Bos taurus OX=9913 PE=2 SV=1	9	1.215	1.174	1.025	1.131	1.214	1.187	1.167	1.086	1.1705	0.982	1.017	0.764	0.97	1.012	0.934	1.064	0.788	0.976	0.833832	-0.262172	0.00950243
Q28178	Thrombospondin-1 OS=Bos taurus OX=9913 GN=THBS1 PE=2 SV=2	18	1.19	1.197	1.035	1.092	1.22	1.178	1.145	1.015	1.1615	0.999	0.939	0.752	0.983	0.979	0.907	1.037	0.79	0.959	0.825656	-0.276386	0.00843246
F1N3A1	Thrombospondin-1 OS=Bos taurus OX=9913 GN=THBS1 PE=4 SV=1	18	1.19	1.197	1.035	1.092	1.22	1.178	1.145	1.015	1.1615	0.999	0.939	0.752	0.983	0.979	0.907	1.037	0.79	0.959	0.825656	-0.276386	0.00843246
F1MJZ4	Uncharacterized protein OS=Bos taurus OX=9913 GN=IGFALS PE=4 SV=2	4	1.361	1.101	1.183	1.116	1.126	1.106	1.084	0.882	1.111	1.082	0.765	0.859	0.888	0.876	0.82	1.027	0.729	0.8675	0.780828	-0.356923	0.012553
G3N0S9	Uncharacterized protein OS=Bos taurus OX=9913 GN=LOC515150 PE=4 SV=1	3	1.212	1.089	0.775	1.06	1.207	1.054	1.278	0.871	1.0745	1.085	0.864	0.777	0.589	0.759	0.699	0.977	0.847	0.812	0.7557	-0.404114	0.0382853
E1B805	Uncharacterized protein OS=Bos taurus OX=9913 GN=LOC528040 PE=4 SV=2	8	1.369	1.118	1.175	1.286	1.147	1.081	1.374	1.073	1.161	1.034	0.778	1.001	0.793	0.864	1.21	1.092	0.805	0.9325	0.803187	-0.316192	0.0166311
E1BH06	Uncharacterized protein OS=Bos taurus OX=9913 GN=LOC617696 PE=1 SV=2	31	1.214	1.257	1.232	1.123	1.231	1.154	1.047	1.009	1.184	0.995	0.739	0.997	0.886	0.91	1.005	1.16	0.745	0.9525	0.804476	-0.313878	0.013462
F1MP09	Uncharacterized protein OS=Bos taurus OX=9913 PE=4 SV=2	3	1.188	1.155	1.252	1.1	1.208	1.208	0.946	1.044	1.1715	0.995	0.9	1.022	0.759	0.869	0.758	1.117	0.753	0.8845	0.755015	-0.405423	0.012553
E1BFN5	Uncharacterized protein OS=Bos taurus OX=9913 PE=4 SV=2	7	1.039	1.261	1.059	1.007	1.404	1.171	1.093	1.045	1.076	1.165	0.791	0.809	0.907	0.853	0.956	1.096	0.826	0.88	0.817844	-0.290103	0.0342268
P07224	Vitamin K-dependent protein S OS=Bos taurus OX=9913 GN=PROS1 PE=1 SV=1	4	1.174	1.048	1.183	0.998	1.339	1.115	1.135	1.349	1.1545	1.037	0.915	1.023	0.888	0.814	0.762	0.981	0.76	0.9015	0.780858	-0.356869	0.00843246

## Sheet: 10pre-S vs. 10pre-C
	List of significant proteins based on fc and q values between 10pre-S vs. 10pre-C
Accession	Description	X..Peptides	10pre-C1	10pre-C2	10pre-C3	10pre-C4	10pre-C5	10pre-C6	10pre-C7	10pre-C8	median c	10pre-S1	10pre-S2	10pre-S3	10pre-S4	10pre-S5	10pre-S6	10pre-S7	10pre-S8	median s	fc	log fc	q
B7FEK7	43kDa collectin OS=Bos taurus OX=9913 GN=CL43 PE=4 SV=1	1	1.743	1.143	1.445	1.94	1.296	0.875	2.305	0.652	1.3705	0.266	0.598	0.767	0.936	1.077	0.892	0.871	1.223	0.8815	0.643196	-0.63667	0.163245
P28800	Alpha-2-antiplasmin OS=Bos taurus OX=9913 GN=SERPINF2 PE=1 SV=2	6	1.233	1.115	1.189	1.272	0.912	1.173	1.511	0.829	1.181	1.197	0.708	0.877	0.942	0.83	0.901	0.896	0.785	0.8865	0.750635	-0.413816	0.158734
P41361	Antithrombin-III OS=Bos taurus OX=9913 GN=SERPINC1 PE=1 SV=2	3	1.531	1.197	1.247	1.356	0.973	0.951	1.445	0.813	1.222	1.01	1.288	0.876	0.868	0.757	0.965	0.912	0.74	0.894	0.731588	-0.450898	0.177375
F1MYX2	Apolipoprotein M OS=Bos taurus OX=9913 GN=APOM PE=4 SV=1	2	1.333	1.108	1.721	NA	NA	1.434	1.288	1.777	1.3835	1.157	1.208	0.947	NA	0.891	1.023	1.207	0.876	1.023	0.739429	-0.435516	0.158734
Q3ZBQ9	APOM protein OS=Bos taurus OX=9913 GN=APOM PE=2 SV=1	2	1.333	1.108	1.721	NA	NA	1.434	1.288	1.777	1.3835	1.157	1.208	0.947	NA	0.891	1.023	1.207	0.876	1.023	0.739429	-0.435516	0.158734
Q28065	C4b-binding protein alpha chain OS=Bos taurus OX=9913 GN=C4BPA PE=2 SV=1	4	1.078	1.171	0.996	1.368	1.211	1.409	1.512	0.743	1.191	1.251	0.968	0.944	0.858	0.79	0.868	0.895	0.808	0.8815	0.740134	-0.434141	0.171138
P00732	Carboxypeptidase B OS=Bos taurus OX=9913 GN=CPB1 PE=1 SV=2	1	1.095	1.047	1.325	1.389	0.91	1.25	NA	0.8	1.095	0.959	0.891	0.907	1.031	0.679	0.91	NA	0.775	0.907	0.828311	-0.271756	0.173525
Q2KIG3	Carboxypeptidase B2 OS=Bos taurus OX=9913 GN=CPB2 PE=1 SV=1	2	1.157	1.01	1.273	1.456	0.876	1.173	1.463	0.8	1.165	1.053	0.848	0.921	0.92	0.689	0.96	0.887	0.767	0.9035	0.775536	-0.366733	0.158734
F1MFY6	Collectin-43 precursor OS=Bos taurus OX=9913 PE=4 SV=2	1	1.743	1.143	1.445	1.94	1.296	0.875	2.305	0.652	1.3705	0.266	0.598	0.767	0.936	1.077	0.892	0.871	1.223	0.8815	0.643196	-0.63667	0.163245
Q2KIV9	Complement C1q subcomponent subunit B OS=Bos taurus OX=9913 GN=C1QB PE=1 SV=1	4	1.28	1.162	1.307	1.196	0.975	1.247	1.796	1.124	1.2215	1.327	NA	0.827	0.889	0.952	0.878	1.037	0.985	0.952	0.77937	-0.35962	0.164489
A5D9E9	Complement C1r subcomponent precursor OS=Bos taurus OX=9913 GN=C1R PE=2 SV=1	5	1.235	NA	0.95	1.313	0.983	1.676	1.353	NA	1.274	NA	0.849	0.853	0.793	0.915	0.963	1.252	0.906	0.906	0.711146	-0.491782	0.177375
Q3SYT3	Complement C1r subcomponent precursor OS=Bos taurus OX=9913 GN=C1R PE=2 SV=1	2	1.137	NA	1.145	1.248	1.01	1.777	1.377	NA	1.1965	NA	0.793	0.882	0.785	0.867	NA	NA	0.863	0.863	0.72127	-0.471388	0.158734
Q2UVX4	Complement C3 OS=Bos taurus OX=9913 GN=C3 PE=1 SV=2	37	1.137	1.274	1.117	1.436	0.933	0.9	1.533	0.83	1.127	1.109	0.874	0.834	0.96	0.755	0.982	0.973	0.78	0.917	0.813665	-0.297494	0.191273
G3X7A5	Complement C3 OS=Bos taurus OX=9913 GN=C3 PE=4 SV=1	36	1.134	1.274	1.117	1.436	0.934	0.9	1.533	0.83	1.1255	1.109	0.866	0.834	0.961	0.755	0.982	0.973	0.78	0.9135	0.811639	-0.301089	0.191273
P12082	Complement C5a anaphylatoxin OS=Bos taurus OX=9913 GN=C5 PE=1 SV=1	1	1.144	NA	1.368	1.409	1.104	1.38	1.385	0.902	1.368	NA	0.749	0.875	0.891	0.723	0.963	0.965	0.816	0.875	0.63962	-0.644713	0.0609789
F1MY85	Complement C5a anaphylatoxin OS=Bos taurus OX=9913 GN=C5 PE=1 SV=2	21	1.165	1.208	1.289	1.329	0.919	1.187	1.369	0.843	1.1975	1.25	0.74	0.86	0.903	0.763	0.939	0.97	0.867	0.885	0.73904	-0.436276	0.158734
F1MX87	Complement C8 alpha chain OS=Bos taurus OX=9913 GN=C8A PE=4 SV=1	7	1.309	1.07	1.239	1.383	0.919	1.232	1.587	0.831	1.2355	1.093	0.911	0.856	0.87	0.795	0.977	0.989	0.883	0.897	0.726022	-0.461915	0.158734
F1N102	Complement C8 beta chain OS=Bos taurus OX=9913 GN=C8B PE=4 SV=2	5	1.269	1.161	1.247	1.306	1.003	1.201	1.301	1.062	1.224	1.018	0.719	0.844	0.9	0.799	0.985	0.906	0.829	0.872	0.712418	-0.489204	0.00271199
F1MX86	Complement C8 beta chain OS=Bos taurus OX=9913 GN=C8B PE=4 SV=2	3	1.295	1.242	1.243	1.336	1.048	1.244	1.364	1.034	1.2435	0.998	0.711	0.82	0.999	0.813	0.944	0.894	0.87	0.882	0.709288	-0.495556	0.00271199
A0A0F6QNP7	Complement component 3 OS=Bos taurus OX=9913 GN=C3 PE=2 SV=1	37	1.137	1.274	1.117	1.436	0.933	0.9	1.533	0.83	1.127	1.109	0.874	0.834	0.96	0.755	0.982	0.973	0.78	0.917	0.813665	-0.297494	0.191273
Q693V9	Complement component 3d (Fragment) OS=Bos taurus OX=9913 PE=2 SV=1	8	1.127	1.273	1.099	1.464	0.963	0.884	1.535	0.809	1.113	1.135	0.833	0.855	0.96	0.762	1.009	0.958	0.78	0.9065	0.814465	-0.296075	0.197565
A5D9D2	Complement component 4 binding protein, alpha chain OS=Bos taurus OX=9913 GN=C4BPA PE=2 SV=1	5	1.212	1.182	0.975	1.428	1.17	1.482	1.544	0.733	1.197	1.139	1.028	0.937	0.923	0.812	0.804	1.028	0.869	0.93	0.776942	-0.364121	0.173525
A0A0F6QMJ3	Complement component 5 OS=Bos taurus OX=9913 GN=C5 PE=2 SV=1	20	1.165	1.21	1.289	1.329	0.919	1.187	1.369	0.843	1.1985	1.241	0.74	0.859	0.903	0.763	0.939	0.968	0.867	0.885	0.738423	-0.437481	0.158734
Q1JPD0	Complement component 8, alpha polypeptide (Fragment) OS=Bos taurus OX=9913 GN=C8A PE=2 SV=1	2	1.328	1.061	1.213	1.342	0.931	1.422	NA	0.901	1.213	1.152	0.768	0.833	0.92	0.788	0.947	0.959	0.889	0.9045	0.745672	-0.423387	0.158734
Q2KIH5	Complement component 8, alpha polypeptide OS=Bos taurus OX=9913 GN=C8A PE=2 SV=1	6	1.309	1.07	1.239	1.383	0.919	1.232	1.587	0.845	1.2355	1.093	0.86	0.856	0.87	0.795	0.977	0.989	0.883	0.8765	0.709429	-0.495269	0.158734
Q2KIK9	Complement component 8, beta polypeptide OS=Bos taurus OX=9913 GN=C8B PE=2 SV=1	3	1.295	1.242	1.243	1.336	1.048	1.244	1.364	1.034	1.2435	0.998	0.711	0.82	0.999	0.813	0.944	0.894	0.87	0.882	0.709288	-0.495556	0.00271199
Q1A7A4	Complement component C5a (Fragment) OS=Bos taurus OX=9913 PE=2 SV=1	1	1.144	NA	1.368	1.409	1.104	1.38	1.385	0.902	1.368	NA	0.749	0.875	0.891	0.723	0.963	0.965	0.816	0.875	0.63962	-0.644713	0.0609789
F1N045	Complement component C7 OS=Bos taurus OX=9913 GN=C7 PE=4 SV=1	7	0.981	0.944	1.204	1.253	0.93	1.245	1.171	0.821	1.076	1.122	0.863	0.794	1.027	0.718	0.922	0.839	0.741	0.851	0.790892	-0.338447	0.173525
Q3KUS7	Complement factor B (Fragment) OS=Bos taurus OX=9913 GN=BF PE=4 SV=1	2	1.277	0.937	1.265	1.173	1.052	1.022	1.444	0.827	1.1125	1.009	0.777	0.89	0.759	0.719	0.876	0.967	0.773	0.8265	0.742921	-0.428719	0.158734
F1N4M7	Complement factor I OS=Bos taurus OX=9913 GN=CFI PE=1 SV=2	7	1.217	1.053	1.169	1.375	0.972	1.177	1.469	0.878	1.173	1.062	0.82	0.87	0.963	0.859	1.019	0.924	0.863	0.897	0.764706	-0.387023	0.158734
Q32PI4	Complement factor I OS=Bos taurus OX=9913 GN=CFI PE=2 SV=1	7	1.217	1.053	1.169	1.375	0.972	1.177	1.469	0.878	1.173	1.062	0.82	0.87	0.963	0.859	1.019	0.924	0.863	0.897	0.764706	-0.387023	0.158734
A7YWU8	CPB1 protein OS=Bos taurus OX=9913 GN=CPB1 PE=2 SV=1	1	1.095	1.047	1.325	1.389	0.91	1.25	NA	0.8	1.095	0.959	0.891	0.907	1.031	0.679	0.91	NA	0.775	0.907	0.828311	-0.271756	0.173525
B8Y9T0	Cumulus cell-specific fibronectin 1 transcript variant OS=Bos taurus OX=9913 GN=FN1 PE=2 SV=1	28	1.359	0.996	1.365	1.363	1.107	0.978	1.59	0.851	1.233	0.989	0.948	0.921	0.873	0.835	1.005	1.028	0.785	0.9345	0.757908	-0.399906	0.158734
A5PJT7	ECM1 protein OS=Bos taurus OX=9913 GN=ECM1 PE=2 SV=1	6	1.033	1.136	1.044	1.028	0.811	1.218	1.334	1.085	1.0645	1.154	0.681	0.792	1.072	0.648	0.901	0.835	0.758	0.8135	0.764209	-0.387962	0.158734
B8Y9S9	Embryo-specific fibronectin 1 transcript variant OS=Bos taurus OX=9913 GN=FN1 PE=2 SV=1	29	1.359	0.996	1.365	1.363	1.107	0.978	1.59	0.851	1.233	0.989	0.948	0.921	0.873	0.835	1	1.028	0.785	0.9345	0.757908	-0.399906	0.158734
Q32T06	Endopin 2C OS=Bos taurus OX=9913 PE=2 SV=1	4	0.485	0.444	1.609	1.477	0.467	2.211	0.633	0.54	0.5865	0.649	0.333	0.384	1.957	1.046	0.455	1.929	1.238	0.8475	1.44501	0.531082	0.963646
P07589	Fibronectin OS=Bos taurus OX=9913 GN=FN1 PE=1 SV=4	29	1.359	0.996	1.365	1.363	1.107	0.978	1.59	0.851	1.233	0.989	0.948	0.921	0.873	0.835	1	1.028	0.785	0.9345	0.757908	-0.399906	0.158734
G5E5A9	Fibronectin OS=Bos taurus OX=9913 GN=FN1 PE=4 SV=1	29	1.359	0.996	1.365	1.363	1.107	0.978	1.59	0.851	1.233	0.989	0.948	0.921	0.873	0.835	1	1.028	0.785	0.9345	0.757908	-0.399906	0.158734
Q3T101	IGL@ protein OS=Bos taurus OX=9913 GN=IGL@ PE=1 SV=1	6	1.201	0.813	1.296	1.086	0.794	1.319	1.577	1.154	1.1775	0.896	0.634	1.011	1.07	0.806	0.965	0.895	0.775	0.8955	0.76051	-0.394962	0.171138
Q09TE3	Insulin-like growth factor binding protein acid labile subunit OS=Bos taurus OX=9913 PE=2 SV=1	4	1.511	1.003	1.242	1.27	0.898	1.036	1.49	0.74	1.139	0.858	1.2	0.887	0.734	0.785	0.909	0.937	0.859	0.873	0.766462	-0.383714	0.191273
M5FKF4	Insulin-like growth factor binding protein, acid labile subunit OS=Bos taurus OX=9913 GN=IGFALS PE=4 SV=1	4	1.511	1.003	1.242	1.27	0.898	1.036	1.49	0.74	1.139	0.858	1.2	0.887	0.734	0.785	0.909	0.937	0.859	0.873	0.766462	-0.383714	0.191273
P56652	Inter-alpha-trypsin inhibitor heavy chain H3 OS=Bos taurus OX=9913 GN=ITIH3 PE=1 SV=2	2	1.187	1.062	1.409	1.475	0.747	1.747	1.192	0.867	1.1895	1.187	0.767	0.994	0.782	NA	0.915	1.03	0.724	0.915	0.769231	-0.378512	0.196582
P01044	Kininogen-1 OS=Bos taurus OX=9913 GN=KNG1 PE=1 SV=1	6	1.355	1.194	1.431	1.223	1.036	0.819	1.529	0.81	1.2085	1.119	1.172	0.995	0.796	0.767	0.842	0.759	0.708	0.819	0.6777	-0.561282	0.173525
A0A140T8C8	Kininogen-1 OS=Bos taurus OX=9913 GN=KNG1 PE=4 SV=1	6	1.355	1.194	1.431	1.223	1.036	0.819	1.529	0.81	1.2085	1.119	1.172	0.995	0.796	0.767	0.842	0.759	0.708	0.819	0.6777	-0.561282	0.173525
F1MNV5	Kininogen-1 OS=Bos taurus OX=9913 GN=KNG1 PE=4 SV=2	5	1.356	1.194	1.431	1.215	1.024	0.819	1.526	0.801	1.2045	1.119	1.177	1.01	0.79	0.769	0.835	0.759	0.696	0.8125	0.674554	-0.567995	0.177375
Q2KIF2	Leucine-rich alpha-2-glycoprotein 1 OS=Bos taurus OX=9913 GN=LRG1 PE=1 SV=1	5	1.399	1.189	1.189	1.318	0.862	1.279	1.265	0.833	1.227	1.267	0.892	0.876	0.781	0.733	0.91	0.931	0.755	0.884	0.720456	-0.473017	0.158734
E1BH94	Peptidoglycan recognition protein 2 OS=Bos taurus OX=9913 GN=PGLYRP2 PE=4 SV=2	3	1.296	1.59	1.137	1.38	0.825	1.863	1.33	NA	1.33	0.956	1.083	0.805	1.128	0.732	0.9	1.154	0.862	0.928	0.697744	-0.51923	0.158734
Q95121	Pigment epithelium-derived factor OS=Bos taurus OX=9913 GN=SERPINF1 PE=1 SV=1	4	1.265	0.961	1.271	1.341	0.989	1.131	1.444	NA	1.265	1.026	1	0.978	0.899	0.738	1.219	1.222	0.842	0.989	0.781818	-0.355095	0.191273
P06868	Plasminogen OS=Bos taurus OX=9913 GN=PLG PE=1 SV=2	11	1.178	1.157	1.073	1.192	0.831	1.393	1.45	1.096	1.1675	1.084	0.835	0.851	0.997	0.783	0.909	0.949	0.826	0.88	0.753747	-0.407847	0.158734
Q2KIT0	Protein HP-20 homolog OS=Bos taurus OX=9913 PE=2 SV=1	3	2.007	1.189	1.365	2.066	0.942	1.127	2.286	0.845	1.277	0.692	1.192	0.925	0.653	0.835	1.066	1.551	0.859	0.892	0.698512	-0.517643	0.193706
Q2KIU3	Protein HP-25 homolog 2 OS=Bos taurus OX=9913 PE=2 SV=1	2	1.519	1.288	NA	2.896	1.935	NA	2.294	0.845	1.727	1.007	NA	0.733	1.675	0.882	0.933	0.868	0.901	0.901	0.521714	-0.938669	0.193706
Q3SYR0	Serpin peptidase inhibitor, clade A (Alpha-1 antiproteinase, antitrypsin), member 7 OS=Bos taurus OX=9913 GN=SERPINA7 PE=2 SV=1	2	1.339	0.94	1.145	1.302	0.922	1.101	1.397	0.917	1.123	1.145	0.912	0.918	0.65	0.947	NA	0.899	0.771	0.912	0.81211	-0.300252	0.158734
Q28178	Thrombospondin-1 OS=Bos taurus OX=9913 GN=THBS1 PE=2 SV=2	18	1.25	1.245	1.159	1.384	0.766	1.376	1.328	0.995	1.2475	1.378	1.001	0.774	0.814	0.774	0.994	0.916	0.833	0.8745	0.701002	-0.51251	0.173525
F1N3A1	Thrombospondin-1 OS=Bos taurus OX=9913 GN=THBS1 PE=4 SV=1	18	1.25	1.245	1.159	1.384	0.766	1.376	1.328	0.995	1.2475	1.378	1.001	0.774	0.814	0.774	0.994	0.916	0.833	0.8745	0.701002	-0.51251	0.173525
Q9TT36	Thyroxine-binding globulin OS=Bos taurus OX=9913 GN=SERPINA7 PE=2 SV=1	2	1.339	0.94	1.145	1.302	0.922	1.101	1.397	0.917	1.123	1.145	0.912	0.918	0.65	0.947	NA	0.899	0.771	0.912	0.81211	-0.300252	0.158734
F1MJZ4	Uncharacterized protein OS=Bos taurus OX=9913 GN=IGFALS PE=4 SV=2	4	1.511	1.003	1.242	1.27	0.898	1.036	1.49	0.74	1.139	0.858	1.2	0.887	0.734	0.785	0.909	0.937	0.859	0.873	0.766462	-0.383714	0.191273
G3N2D7	Uncharacterized protein OS=Bos taurus OX=9913 GN=LOC100297192 PE=4 SV=1	3	1.584	0.928	1.441	1.424	0.815	1.273	1.665	1.077	1.3485	1.191	0.98	1.072	1.051	0.788	1.093	0.994	0.805	1.0225	0.75825	-0.399255	0.191273
G3N0S9	Uncharacterized protein OS=Bos taurus OX=9913 GN=LOC515150 PE=4 SV=1	3	1.126	1.416	0.946	1.532	1.186	1.67	1.466	0.77	1.301	1.068	1.035	0.881	0.632	0.919	0.816	0.865	0.908	0.8945	0.687548	-0.540468	0.158734
E1BH06	Uncharacterized protein OS=Bos taurus OX=9913 GN=LOC617696 PE=1 SV=2	31	1.142	1.179	1.23	1.404	0.865	1.3	1.356	0.815	1.2045	1.18	0.899	0.96	0.933	0.761	1.05	1.06	0.79	0.9465	0.785803	-0.34776	0.191273
G5E5V1	Uncharacterized protein OS=Bos taurus OX=9913 PE=4 SV=1	1	1.201	0.813	1.296	1.086	0.794	1.319	1.577	1.154	1.1775	0.896	0.634	1.011	1.07	0.806	0.965	0.895	0.775	0.8955	0.76051	-0.394962	0.171138
F1MVK1	Uncharacterized protein OS=Bos taurus OX=9913 PE=4 SV=2	17	1.135	1.16	1.287	1.221	0.871	1.154	1.452	NA	1.16	1.201	NA	0.974	0.836	1.11	0.932	1.047	0.874	0.974	0.839655	-0.252131	0.193706
F1MP09	Uncharacterized protein OS=Bos taurus OX=9913 PE=4 SV=2	3	1.257	1.198	1.095	1.266	0.961	1.6	1.151	0.898	1.1745	1.125	1.009	0.961	0.792	0.649	0.915	0.926	0.838	0.9205	0.783738	-0.351557	0.158734
P00744	Vitamin K-dependent protein Z OS=Bos taurus OX=9913 GN=PROZ PE=1 SV=1	2	1.437	1.05	1.17	1.309	1.22	1.257	1.272	0.953	1.2385	1.23	NA	0.894	0.933	0.77	0.994	0.991	0.818	0.933	0.753331	-0.408645	0.158734
G1K1X9	Vitamin K-dependent protein Z OS=Bos taurus OX=9913 GN=PROZ PE=3 SV=1	2	1.437	1.05	1.17	1.309	1.22	1.257	1.272	0.953	1.2385	1.23	NA	0.894	0.933	0.77	0.994	0.991	0.818	0.933	0.753331	-0.408645	0.158734

## Sheet: 5post-S vs. 5post-C 
		List of significant proteins based on fc and q values between 5post-S vs. 5post-C
Accession	Description	X..Peptides	5post-C1	5post-C2	5post-C3	5post-C4	5post-C5	5post-C6	5post-C7	5post-C8	median c	5post-S1	5post-S2	5post-S3	5post-S4	5post-S5	5post-S6	5post-S7	5post-S8	median s	fc	log fc	q
Q3SZ57	Alpha-fetoprotein OS=Bos taurus OX=9913 GN=AFP PE=2 SV=1	1	1.33	1.554	1.556	1.314	0.963	1.266	1.102	1.118	1.29	1.218	1.223	0.992	0.939	1.079	0.717	0.768	0.893	0.9655	0.74845	-0.418023	0.0104327
P17690	Beta-2-glycoprotein 1 OS=Bos taurus OX=9913 GN=APOH PE=1 SV=4	2	1.607	1.06	1.192	1.365	1.092	1.229	1.08	1.061	1.142	1.044	0.945	0.748	0.989	1.195	0.796	0.976	0.726	0.9605	0.841068	-0.249705	0.00664931
A0A140T843	Beta-2-glycoprotein 1 OS=Bos taurus OX=9913 GN=APOH PE=4 SV=1	1	1.607	1.06	1.192	1.365	1.092	1.229	1.08	1.061	1.142	1.044	0.945	0.748	0.989	1.195	0.796	0.976	0.726	0.9605	0.841068	-0.249705	0.00664931
A8YXZ2	C8G protein OS=Bos taurus OX=9913 GN=C8G PE=2 SV=1	3	1.312	0.984	0.908	1.261	1.063	1.008	1.192	1.146	1.1045	1.033	1.098	0.877	0.881	1.037	0.704	1.053	0.79	0.957	0.866455	-0.206803	0.0271137
Q2KIG3	Carboxypeptidase B2 OS=Bos taurus OX=9913 GN=CPB2 PE=1 SV=1	2	1.081	0.982	0.923	1.278	1.149	1.035	NA	1.069	1.069	1.003	1.014	0.929	1.05	NA	0.716	0.96	0.812	0.96	0.898036	-0.155156	0.0375978
F1N076	Ceruloplasmin OS=Bos taurus OX=9913 GN=CP PE=1 SV=2	10	1.096	1.156	0.917	1.045	1.347	1.263	1.112	1.128	1.12	1.012	1.049	0.623	1.002	0.817	0.882	1.209	1.003	1.0025	0.895089	-0.159896	0.0339515
Q0VCX1	Complement C1s subcomponent OS=Bos taurus OX=9913 GN=C1S PE=2 SV=2	7	1.147	1.142	1.044	1.221	1.349	1.22	1.164	0.999	1.1555	0.941	1.178	0.818	1.209	0.998	0.839	1.181	0.913	0.9695	0.839031	-0.253204	0.0461281
F1MJ12	Complement C1s subcomponent OS=Bos taurus OX=9913 GN=C1S PE=3 SV=1	7	1.147	1.142	1.044	1.221	1.349	1.22	1.164	0.999	1.1555	0.941	1.178	0.818	1.209	0.998	0.839	1.181	0.913	0.9695	0.839031	-0.253204	0.0461281
F1MY85	Complement C5a anaphylatoxin OS=Bos taurus OX=9913 GN=C5 PE=1 SV=2	21	1.292	1.099	0.944	1.182	1.192	1.271	1.154	1.058	1.168	1.109	0.937	0.802	0.933	1.03	0.874	1.043	0.854	0.935	0.800514	-0.321002	0.00256659
F1MX87	Complement C8 alpha chain OS=Bos taurus OX=9913 GN=C8A PE=4 SV=1	7	1.263	0.928	0.962	1.185	1.205	0.962	1.37	1.06	1.1225	1.034	1.076	0.827	0.947	0.872	0.733	1.042	0.892	0.9195	0.819154	-0.287794	0.0200165
F1N102	Complement C8 beta chain OS=Bos taurus OX=9913 GN=C8B PE=4 SV=2	5	1.108	1.223	0.972	1.235	1.395	1.127	1.167	1.143	1.155	1.004	0.914	0.776	1.018	0.92	0.776	0.977	0.922	0.921	0.797403	-0.32662	0.00036234
F1MX86	Complement C8 beta chain OS=Bos taurus OX=9913 GN=C8B PE=4 SV=2	3	1.079	1.432	0.983	1.239	1.471	1.14	1.201	1.154	1.1775	1.023	0.906	0.735	1.025	0.926	0.777	0.954	0.95	0.938	0.796603	-0.328067	0.00106277
Q693V9	Complement component 3d (Fragment) OS=Bos taurus OX=9913 PE=2 SV=1	8	1.227	1.205	0.906	1.418	1.035	1.067	1.136	1.06	1.1015	1.017	1.163	0.853	0.963	1.037	0.733	1.122	0.61	0.99	0.898774	-0.153969	0.0430504
A0A0F6QMJ3	Complement component 5 OS=Bos taurus OX=9913 GN=C5 PE=2 SV=1	20	1.292	1.099	0.939	1.182	1.18	1.27	1.154	1.058	1.167	1.109	0.937	0.802	0.933	1.03	0.874	1.037	0.854	0.935	0.8012	-0.319766	0.00270527
Q2KIH5	Complement component 8, alpha polypeptide OS=Bos taurus OX=9913 GN=C8A PE=2 SV=1	6	1.317	0.928	0.962	1.185	1.205	0.962	1.37	1.06	1.1225	1.034	1.076	0.835	0.947	0.872	0.733	1.042	0.91	0.9285	0.827171	-0.273742	0.0213666
Q2KIK9	Complement component 8, beta polypeptide OS=Bos taurus OX=9913 GN=C8B PE=2 SV=1	3	1.079	1.432	0.983	1.239	1.471	1.14	1.201	1.154	1.1775	1.023	0.906	0.735	1.025	0.926	0.777	0.954	0.95	0.938	0.796603	-0.328067	0.00106277
F1N4M7	Complement factor I OS=Bos taurus OX=9913 GN=CFI PE=1 SV=2	7	1.082	0.94	0.958	1.145	1.307	1.126	1.081	1.172	1.104	0.941	0.992	0.829	0.939	1.004	0.783	1.039	0.886	0.94	0.851449	-0.232008	0.00520109
Q32PI4	Complement factor I OS=Bos taurus OX=9913 GN=CFI PE=2 SV=1	7	1.082	0.94	0.958	1.145	1.307	1.126	1.081	1.172	1.104	0.941	0.992	0.829	0.939	1.004	0.783	1.039	0.886	0.94	0.851449	-0.232008	0.00520109
Q32T06	Endopin 2C OS=Bos taurus OX=9913 PE=2 SV=1	4	0.474	0.381	1.967	1.379	0.617	0.474	0.368	1.411	0.5455	0.608	0.443	0.465	1.523	1.158	0.484	2.394	1.956	0.883	1.6187	0.694834	0.0489672
Q95KV5	Fibronectin (Fragment) OS=Bos taurus OX=9913 GN=FN PE=2 SV=1	4	1.239	0.914	1.045	1.147	1.266	0.974	1.078	1.068	1.073	0.9	1.092	0.904	NA	1.08	0.711	1.01	0.821	0.904	0.842498	-0.247255	0.0361722
F1MYN5	Fibulin-1 OS=Bos taurus OX=9913 GN=FBLN1 PE=1 SV=2	5	1.414	NA	1.006	1.317	1.395	1.239	NA	1.206	1.278	NA	1.176	0.771	1.128	NA	0.683	0.953	0.965	0.959	0.750391	-0.414285	0.0106793
A5D7S8	Fibulin-1 OS=Bos taurus OX=9913 GN=FBLN1 PE=2 SV=1	5	1.414	NA	1.006	1.317	1.395	1.239	NA	1.206	1.278	NA	1.176	0.771	1.128	NA	0.683	0.953	0.965	0.959	0.750391	-0.414285	0.0106793
Q28115	Glial fibrillary acidic protein OS=Bos taurus OX=9913 GN=GFAP PE=1 SV=2	1	0.759	0.964	0.872	1.585	1.365	1.04	0.768	1.68	1.002	1.292	1.638	0.949	2.696	1.476	0.92	1.611	0.977	1.384	1.38124	0.465961	0.0220283
Q2KII3	Hepatitis A virus cellular receptor 1 N-terminal domain containing protein OS=Bos taurus OX=9913 GN=MGC137099 PE=2 SV=1	3	1.096	0.918	1.206	1.287	NA	1.304	1.171	1.073	1.171	1.121	1.041	0.895	0.833	0.953	0.742	0.969	0.692	0.924	0.789069	-0.341776	0.00493209
A6QNZ7	Keratin 10 (Epidermolytic hyperkeratosis; keratosis palmaris et plantaris) OS=Bos taurus OX=9913 GN=KRT10 PE=2 SV=1	7	1.062	0.779	0.727	1.589	1.515	0.915	0.865	1.699	0.9885	1.312	1.409	1.014	1.795	1.385	0.769	1.351	1.082	1.3315	1.34699	0.42974	0.0050705
F1N362	Keratin 84 OS=Bos taurus OX=9913 GN=KRT84 PE=3 SV=2	1	0.759	0.964	0.872	1.585	1.365	1.04	0.768	1.68	1.002	1.292	1.638	0.949	2.696	1.476	0.92	1.611	0.977	1.384	1.38124	0.465961	0.0220283
P06394	Keratin, type I cytoskeletal 10 OS=Bos taurus OX=9913 GN=KRT10 PE=3 SV=1	7	1.062	0.779	0.727	1.589	1.515	0.915	0.865	1.699	0.9885	1.312	1.409	1.014	1.795	1.385	0.769	1.351	1.082	1.3315	1.34699	0.42974	0.0050705
P04263	Keratin, type II cytoskeletal 68 kDa, component IA (Fragment) OS=Bos taurus OX=9913 PE=2 SV=1	1	0.759	0.964	0.872	1.585	1.365	1.04	0.768	1.68	1.002	1.292	1.638	0.949	2.696	1.476	0.92	1.611	0.977	1.384	1.38124	0.465961	0.0220283
Q29S21	Keratin, type II cytoskeletal 7 OS=Bos taurus OX=9913 GN=KRT7 PE=2 SV=1	3	0.759	0.964	0.872	1.585	1.365	1.04	0.768	1.68	1.002	1.292	1.638	0.949	2.696	1.476	0.92	1.611	0.977	1.384	1.38124	0.465961	0.0220283
A0JND2	Keratin, type II cytoskeletal 80 OS=Bos taurus OX=9913 GN=KRT80 PE=2 SV=1	1	0.759	0.964	0.872	1.585	1.365	1.04	0.768	1.68	1.002	1.292	1.638	0.949	2.696	1.476	0.92	1.611	0.977	1.384	1.38124	0.465961	0.0220283
Q2KIF2	Leucine-rich alpha-2-glycoprotein 1 OS=Bos taurus OX=9913 GN=LRG1 PE=1 SV=1	5	1.271	1.302	1.056	1.234	1.425	1.085	1.141	1.239	1.2365	1.163	1.107	0.88	0.844	0.941	0.614	0.993	0.977	0.959	0.775576	-0.36666	0.0023458
E1BH94	Peptidoglycan recognition protein 2 OS=Bos taurus OX=9913 GN=PGLYRP2 PE=4 SV=2	3	1.004	1.728	0.833	1.042	1.297	1.214	1.095	1.256	1.1545	0.87	1.047	NA	0.884	0.966	0.917	0.999	NA	0.9415	0.815505	-0.294235	0.0423141
P18902	Retinol-binding protein 4 OS=Bos taurus OX=9913 GN=RBP4 PE=1 SV=1	2	1.545	1.301	1.026	1.185	1.32	1.207	1.168	1.444	1.254	0.643	1.268	1.081	NA	0.994	0.775	0.902	0.75	0.902	0.719298	-0.475338	0.00424532
Q32L14	Retinol-binding protein OS=Bos taurus OX=9913 GN=RBP4 PE=2 SV=1	1	1.768	1.301	1.026	1.185	1.32	1.207	1.168	1.444	1.254	0.643	1.268	1.081	NA	0.994	0.775	0.902	0.75	0.902	0.719298	-0.475338	0.00490097
G1K122	Retinol-binding protein OS=Bos taurus OX=9913 GN=RBP4 PE=3 SV=1	2	1.545	1.301	1.026	1.185	1.32	1.207	1.168	1.444	1.254	0.643	1.268	1.081	NA	0.994	0.775	0.902	0.75	0.902	0.719298	-0.475338	0.00424532
P02769	Serum albumin OS=Bos taurus OX=9913 GN=ALB PE=1 SV=4	34	1.306	1.109	1.066	1.361	1.069	1.155	1.086	1.08	1.0975	1.181	1.197	0.96	0.998	1.1	0.757	0.913	0.945	0.979	0.892027	-0.16484	0.0437203
A0A140T897	Serum albumin OS=Bos taurus OX=9913 GN=ALB PE=3 SV=1	34	1.306	1.109	1.066	1.361	1.069	1.155	1.086	1.08	1.0975	1.181	1.197	0.96	0.998	1.1	0.757	0.913	0.945	0.979	0.892027	-0.16484	0.0437203
G3N2D7	Uncharacterized protein OS=Bos taurus OX=9913 GN=LOC100297192 PE=4 SV=1	3	1.236	0.987	1.144	1.289	0.998	1.15	1.071	0.999	1.1075	1.021	1.02	0.911	1.188	0.969	0.728	1.065	0.874	0.9945	0.897968	-0.155263	0.0487589
G3N0S9	Uncharacterized protein OS=Bos taurus OX=9913 GN=LOC515150 PE=4 SV=1	3	1.144	1.031	0.952	1.281	1.223	1.096	1.198	1.007	1.12	0.798	1.366	0.736	0.65	1.06	0.644	0.981	0.96	0.879	0.784821	-0.349564	0.0464216
E1BH06	Uncharacterized protein OS=Bos taurus OX=9913 GN=LOC617696 PE=1 SV=2	31	1.196	1.003	1.026	1.277	1.102	1.044	1.166	1.131	1.1165	1.078	1.089	0.881	0.922	1.055	0.732	1.185	0.718	0.9885	0.885356	-0.17567	0.0413867
A0A0A0MPA0	Uncharacterized protein OS=Bos taurus OX=9913 GN=LOC784932 PE=1 SV=1	4	0.474	0.381	1.967	1.379	0.617	0.474	0.368	1.411	0.5455	0.608	0.443	0.465	1.523	1.158	0.484	2.394	1.956	0.883	1.6187	0.694834	0.0489672
G5E604	Uncharacterized protein OS=Bos taurus OX=9913 PE=1 SV=1	5	1.624	0.69	0.78	1.517	1.007	0.899	0.897	0.723	0.898	1.277	1.465	0.528	0.742	1.079	0.431	1.723	1.263	1.171	1.30401	0.382954	0.00825036
F1MZ96	Uncharacterized protein OS=Bos taurus OX=9913 PE=1 SV=2	2	0.945	0.645	1.491	1.187	1.636	0.727	NA	1.068	1.068	NA	0.696	NA	1.463	NA	1.308	1.379	NA	1.3435	1.25796	0.331085	0.0063367
E1BIL2	Uncharacterized protein OS=Bos taurus OX=9913 PE=3 SV=2	1	0.759	0.964	0.872	1.585	1.365	1.04	0.768	1.68	1.002	1.292	1.638	0.949	2.696	1.476	0.92	1.611	0.977	1.384	1.38124	0.465961	0.0220283

## Sheet: 26post-S vs. 26post-C 
List of significant metabolites based on fc and q values between 26post-S vs. 26post-C
Accession	Description	X..Peptides	26post-C1	26post-C2	26post-C3	26post-C4	26post-C5	26post-C6	26post-C7	26post-C8	median c	26post-S1	26post-S2	26post-S3	26post-S4	26post-S5	26post-S6	26post-S7	26post-S8	median s	fc	log fc	q
Q2KJF1	Alpha-1B-glycoprotein OS=Bos taurus OX=9913 GN=A1BG PE=1 SV=1	17	1.194	1.059	1.066	1.062	1.01	1.016	1.12	1.01	1.0605	1.162	0.903	0.711	0.796	0.766	0.923	0.999	0.745	0.8495	0.801037	-0.320059	0.0464347
P28800	Alpha-2-antiplasmin OS=Bos taurus OX=9913 GN=SERPINF2 PE=1 SV=2	6	1.156	1.226	1.043	0.951	0.957	1.154	1.11	1.234	1.132	1.076	0.86	0.71	1.056	0.781	0.878	0.858	0.702	0.859	0.758834	-0.398144	0.0200515
Q28065	C4b-binding protein alpha chain OS=Bos taurus OX=9913 GN=C4BPA PE=2 SV=1	4	1.107	1.284	1.087	1.047	1.15	0.946	1.244	1.041	1.097	1.17	1.097	0.702	0.797	0.788	0.879	0.951	0.837	0.858	0.782133	-0.354514	0.047651
A8YXZ2	C8G protein OS=Bos taurus OX=9913 GN=C8G PE=2 SV=1	3	1.259	1.046	0.942	1.05	1.037	1.129	1.133	1.145	1.0895	0.98	0.965	0.737	0.91	0.779	0.994	1.049	0.724	0.9375	0.860486	-0.216776	0.0241454
Q28107	Coagulation factor V OS=Bos taurus OX=9913 GN=F5 PE=1 SV=1	6	1.038	1.4	1.078	1.077	1.135	1.256	1.137	1.077	1.1065	1.03	0.966	0.694	0.769	0.724	1.141	0.982	0.842	0.904	0.816991	-0.291609	0.0241454
F1N0I3	Coagulation factor V OS=Bos taurus OX=9913 GN=F5 PE=3 SV=2	4	1.038	1.209	1.105	1.077	1.135	1.256	1.137	1.125	1.13	1.042	0.966	0.716	0.893	0.635	1.141	0.982	0.845	0.9295	0.822566	-0.281796	0.0307132
Q2KIV9	Complement C1q subcomponent subunit B OS=Bos taurus OX=9913 GN=C1QB PE=1 SV=1	4	1.244	NA	1.208	1.162	1.164	1.193	1.212	1.119	1.193	NA	0.787	0.761	0.874	0.966	0.934	0.946	0.874	0.874	0.732607	-0.448889	0.00181557
A5D9E9	Complement C1r subcomponent precursor OS=Bos taurus OX=9913 GN=C1R PE=2 SV=1	5	1.308	1.205	1.24	1.346	1.139	1.293	1.222	1.15	1.231	0.937	0.994	0.516	0.954	0.778	0.939	0.978	0.984	0.9465	0.768887	-0.379156	0.00739809
Q2UVX4	Complement C3 OS=Bos taurus OX=9913 GN=C3 PE=1 SV=2	37	1.074	1.306	1.077	1.182	1.094	1.033	1.151	1.047	1.0855	1.017	1.034	0.697	0.955	0.917	0.976	1.029	0.719	0.9655	0.889452	-0.169012	0.0262768
G3X7A5	Complement C3 OS=Bos taurus OX=9913 GN=C3 PE=4 SV=1	36	1.072	1.311	1.078	1.182	1.093	1.033	1.152	1.046	1.0855	1.011	1.034	0.697	0.957	0.917	0.976	1.032	0.719	0.9665	0.890373	-0.167518	0.0262768
P12082	Complement C5a anaphylatoxin OS=Bos taurus OX=9913 GN=C5 PE=1 SV=1	1	1.195	1.17	1.072	NA	1.228	1.128	NA	1.054	1.149	0.929	1.018	0.736	0.853	0.835	1.018	NA	0.925	0.925	0.805048	-0.312854	0.00883135
F1MY85	Complement C5a anaphylatoxin OS=Bos taurus OX=9913 GN=C5 PE=1 SV=2	21	1.215	1.507	1.055	1.158	1.098	1.1	1.09	1.11	1.105	0.934	0.844	0.695	0.893	0.813	0.911	0.965	0.819	0.8685	0.785973	-0.347449	0.00739809
F1MX87	Complement C8 alpha chain OS=Bos taurus OX=9913 GN=C8A PE=4 SV=1	7	1.214	1.091	1.09	1.107	1.039	1.136	1.094	1.028	1.0925	1.078	0.896	0.763	0.84	0.96	0.946	0.979	0.745	0.921	0.843021	-0.24636	0.0146565
F1N102	Complement C8 beta chain OS=Bos taurus OX=9913 GN=C8B PE=4 SV=2	5	1.19	1.472	0.996	1.026	1.155	1.088	1.197	1.153	1.154	1.021	0.897	0.653	0.912	0.771	0.982	1.036	0.796	0.9045	0.783795	-0.351451	0.0172771
F1MX86	Complement C8 beta chain OS=Bos taurus OX=9913 GN=C8B PE=4 SV=2	3	1.346	1.684	0.972	1.016	1.295	1.063	1.267	1.175	1.221	1.036	0.899	0.634	0.927	0.774	0.946	1.025	0.807	0.913	0.747748	-0.419376	0.0241454
O97941	Complement component 3 (Fragment) OS=Bos taurus OX=9913 PE=2 SV=1	4	1.04	1.236	1.036	1.131	1.224	1.026	1.155	1.026	1.0855	1.075	0.941	0.816	1.021	0.894	0.947	1.081	0.692	0.944	0.869645	-0.201501	0.0464347
A0A0F6QNP7	Complement component 3 OS=Bos taurus OX=9913 GN=C3 PE=2 SV=1	37	1.074	1.306	1.077	1.182	1.094	1.033	1.151	1.047	1.0855	1.017	1.034	0.697	0.955	0.917	0.976	1.029	0.719	0.9655	0.889452	-0.169012	0.0262768
Q693V9	Complement component 3d (Fragment) OS=Bos taurus OX=9913 PE=2 SV=1	8	1.024	1.274	1.098	1.244	1.07	1.091	1.167	1.077	1.0945	0.981	1.003	0.724	0.98	0.973	1.002	0.945	0.725	0.9765	0.892188	-0.16458	0.0164801
A0A0F6QMJ3	Complement component 5 OS=Bos taurus OX=9913 GN=C5 PE=2 SV=1	20	1.215	1.507	1.055	1.158	1.098	1.1	1.09	1.11	1.105	0.934	0.842	0.695	0.893	0.813	0.911	0.965	0.818	0.8675	0.785068	-0.349111	0.00739809
Q1JPD0	Complement component 8, alpha polypeptide (Fragment) OS=Bos taurus OX=9913 GN=C8A PE=2 SV=1	2	NA	1.081	1.152	NA	1.185	1.086	NA	1.073	1.086	0.939	0.886	0.701	0.873	0.808	0.919	NA	0.73	0.873	0.803867	-0.314971	0.00739809
Q2KIH5	Complement component 8, alpha polypeptide OS=Bos taurus OX=9913 GN=C8A PE=2 SV=1	6	1.214	1.164	1.09	1.107	1.039	1.136	1.094	1.028	1.1005	1.041	0.896	0.763	0.84	0.96	0.946	0.979	0.745	0.921	0.836892	-0.256886	0.00883135
Q2KIK9	Complement component 8, beta polypeptide OS=Bos taurus OX=9913 GN=C8B PE=2 SV=1	3	1.346	1.684	0.972	1.016	1.295	1.063	1.267	1.175	1.221	1.036	0.899	0.634	0.927	0.774	0.946	1.025	0.807	0.913	0.747748	-0.419376	0.0241454
Q1A7A4	Complement component C5a (Fragment) OS=Bos taurus OX=9913 PE=2 SV=1	1	1.195	1.17	1.072	NA	1.228	1.128	NA	1.054	1.149	0.929	1.018	0.736	0.853	0.835	1.018	NA	0.925	0.925	0.805048	-0.312854	0.00883135
F1N4M7	Complement factor I OS=Bos taurus OX=9913 GN=CFI PE=1 SV=2	7	0.973	1.291	1.041	1.088	1.09	1.067	1.154	1.126	1.089	1.047	0.982	0.729	0.9	0.873	0.96	0.917	0.875	0.9085	0.834252	-0.261446	0.0134707
Q32PI4	Complement factor I OS=Bos taurus OX=9913 GN=CFI PE=2 SV=1	7	0.973	1.291	1.041	1.088	1.09	1.067	1.154	1.126	1.089	1.047	0.982	0.729	0.9	0.873	0.96	0.917	0.875	0.9085	0.834252	-0.261446	0.0134707
A6QP30	CPN2 protein OS=Bos taurus OX=9913 GN=CPN2 PE=2 SV=1	4	1.208	1.24	1.096	1.203	1.023	1.147	1.033	1.13	1.1385	0.992	0.964	0.734	0.769	0.853	1.07	0.916	0.618	0.8845	0.776899	-0.3642	0.0134707
B8Y9T0	Cumulus cell-specific fibronectin 1 transcript variant OS=Bos taurus OX=9913 GN=FN1 PE=2 SV=1	28	1.221	1.24	0.968	1.067	1.13	1.029	1.199	1.048	1.0985	0.99	0.873	0.89	0.876	0.785	0.971	0.898	0.689	0.883	0.803823	-0.31505	0.00739809
B8Y9S9	Embryo-specific fibronectin 1 transcript variant OS=Bos taurus OX=9913 GN=FN1 PE=2 SV=1	29	1.221	1.24	0.968	1.067	1.13	1.029	1.199	1.048	1.0985	0.99	0.873	0.89	0.876	0.785	0.968	0.898	0.689	0.883	0.803823	-0.31505	0.00739809
P50448	Factor XIIa inhibitor OS=Bos taurus OX=9913 PE=1 SV=1	5	0.959	1.315	0.968	1.165	1.037	1.02	1.128	1.13	1.0825	1.03	0.996	0.744	0.962	0.785	0.892	0.927	0.736	0.9095	0.840185	-0.251221	0.0241454
E1BMJ0	Factor XIIa inhibitor precursor OS=Bos taurus OX=9913 GN=SERPING1 PE=3 SV=2	4	0.959	1.277	0.968	1.165	1.037	1.02	1.128	1.13	1.0825	1.044	0.996	0.744	0.962	0.785	0.892	0.927	0.736	0.9095	0.840185	-0.251221	0.0241454
P07589	Fibronectin OS=Bos taurus OX=9913 GN=FN1 PE=1 SV=4	29	1.221	1.24	0.968	1.067	1.13	1.029	1.199	1.048	1.0985	0.99	0.873	0.89	0.876	0.785	0.968	0.898	0.689	0.883	0.803823	-0.31505	0.00739809
G5E5A9	Fibronectin OS=Bos taurus OX=9913 GN=FN1 PE=4 SV=1	29	1.221	1.24	0.968	1.067	1.13	1.029	1.199	1.048	1.0985	0.99	0.873	0.89	0.876	0.785	0.968	0.898	0.689	0.883	0.803823	-0.31505	0.00739809
Q2TBU0	Haptoglobin OS=Bos taurus OX=9913 GN=HP PE=2 SV=1	4	0.101	2.642	2.628	0.429	0.967	0.094	0.425	0.427	0.428	0.494	0.427	0.378	0.273	0.417	0.131	2.484	0.591	0.422	0.985981	-0.0203678	0.00584862
Q09TE3	Insulin-like growth factor binding protein acid labile subunit OS=Bos taurus OX=9913 PE=2 SV=1	4	1.161	1.261	1.084	1.214	1.09	0.917	1.283	1.11	1.1355	1.199	0.918	0.747	0.862	0.808	0.849	0.969	0.708	0.8555	0.753413	-0.408488	0.0200515
M5FKF4	Insulin-like growth factor binding protein, acid labile subunit OS=Bos taurus OX=9913 GN=IGFALS PE=4 SV=1	4	1.161	1.261	1.084	1.214	1.09	0.917	1.283	1.11	1.1355	1.199	0.918	0.747	0.862	0.808	0.849	0.969	0.708	0.8555	0.753413	-0.408488	0.0200515
Q2KIF2	Leucine-rich alpha-2-glycoprotein 1 OS=Bos taurus OX=9913 GN=LRG1 PE=1 SV=1	5	1.359	1.659	1.061	1.308	1.036	1.088	1.156	1.241	1.1985	1.045	0.923	0.8	0.884	0.969	0.98	0.905	0.741	0.914	0.76262	-0.390964	0.0200515
G3MY87	Maltase-glucoamylase OS=Bos taurus OX=9913 GN=MGAM PE=3 SV=1	4	1.029	1.195	0.943	1.461	1.072	1.09	1.125	1.106	1.098	0.881	1.043	0.752	0.881	1.092	NA	0.829	0.736	0.881	0.802368	-0.317664	0.0382149
E1BH94	Peptidoglycan recognition protein 2 OS=Bos taurus OX=9913 GN=PGLYRP2 PE=4 SV=2	3	1.172	1.399	1.014	1.11	1.553	0.927	1.027	1.294	1.141	1.009	0.935	0.746	0.88	0.882	0.967	0.762	0.726	0.881	0.77213	-0.373085	0.0241454
P06868	Plasminogen OS=Bos taurus OX=9913 GN=PLG PE=1 SV=2	11	1.242	1.6	1.004	0.974	1.024	1.051	1.221	1.275	1.136	1.093	0.94	0.726	0.851	0.685	0.975	1.088	0.771	0.8955	0.788292	-0.343197	0.0464347
P00735	Prothrombin OS=Bos taurus OX=9913 GN=F2 PE=1 SV=2	16	1.265	1.346	1.008	1.076	1.073	0.996	1.118	1.149	1.097	1.085	0.874	0.733	0.942	0.753	0.993	0.951	0.78	0.908	0.827712	-0.272799	0.0184435
A6QPQ2	Serpin A3-8 OS=Bos taurus OX=9913 GN=SERPINA3-8 PE=2 SV=1	2	1.136	1.448	1.488	NA	1.131	0.933	NA	0.984	1.1335	0.841	0.872	0.681	0.708	0.768	0.83	NA	1.016	0.83	0.732245	-0.449601	0.0464347
A0A0A0MP89	Serpin A3-8 OS=Bos taurus OX=9913 GN=SERPINA3-8 PE=3 SV=1	2	1.136	1.448	1.488	NA	1.131	0.933	NA	0.984	1.1335	0.841	0.872	0.681	0.708	0.768	0.83	NA	1.016	0.83	0.732245	-0.449601	0.0464347
A5PJ69	SERPINA10 protein OS=Bos taurus OX=9913 GN=SERPINA10 PE=2 SV=1	7	1.373	0.991	1.179	1.252	1.117	1	1.18	1.144	1.1615	0.813	0.983	0.803	0.901	0.837	0.912	0.929	0.826	0.869	0.74817	-0.418561	0.00739809
Q28194	Thrombospondin-1 (Fragment) OS=Bos taurus OX=9913 PE=2 SV=1	9	1.09	1.671	1.238	1.159	1.163	1.158	1.191	1.104	1.161	1.139	0.843	0.693	0.821	0.926	1.093	1.102	0.751	0.8845	0.761843	-0.392434	0.0295752
Q28178	Thrombospondin-1 OS=Bos taurus OX=9913 GN=THBS1 PE=2 SV=2	18	1.094	1.488	1.188	1.12	1.161	1.122	1.117	1.158	1.14	1.067	0.884	0.701	0.869	0.877	1.05	0.994	0.794	0.8805	0.772368	-0.372639	0.0109969
F1N3A1	Thrombospondin-1 OS=Bos taurus OX=9913 GN=THBS1 PE=4 SV=1	18	1.094	1.488	1.188	1.12	1.161	1.122	1.117	1.158	1.14	1.067	0.884	0.701	0.869	0.877	1.05	0.994	0.794	0.8805	0.772368	-0.372639	0.0109969
F1MJZ4	Uncharacterized protein OS=Bos taurus OX=9913 GN=IGFALS PE=4 SV=2	4	1.161	1.261	1.084	1.214	1.09	0.917	1.283	1.11	1.1355	1.199	0.918	0.747	0.862	0.808	0.849	0.969	0.708	0.8555	0.753413	-0.408488	0.0200515
E1B805	Uncharacterized protein OS=Bos taurus OX=9913 GN=LOC528040 PE=4 SV=2	8	1.094	1.444	0.966	1.167	1.109	1.046	1.157	1.105	1.107	1.005	0.994	0.73	0.895	0.858	1.05	1.046	0.802	0.9445	0.853207	-0.229033	0.032454
E1BH06	Uncharacterized protein OS=Bos taurus OX=9913 GN=LOC617696 PE=1 SV=2	31	1.093	1.118	1.139	1.163	1.157	1.121	1.233	1.144	1.1415	1.108	0.962	0.791	0.892	0.875	1.046	0.951	0.749	0.9215	0.807271	-0.308875	0.0134707
F1MLW8	Uncharacterized protein OS=Bos taurus OX=9913 PE=1 SV=2	4	1.069	1.772	0.833	0.866	1.381	1.011	0.935	1.378	1.04	0.556	0.649	0.609	0.652	0.738	0.914	1.057	0.571	0.6505	0.625481	-0.676963	0.0382149
F1MVK1	Uncharacterized protein OS=Bos taurus OX=9913 PE=4 SV=2	17	1.089	NA	1.556	1.2	1.12	0.995	1.13	1.187	1.13	NA	0.904	0.797	0.963	0.91	0.871	0.979	0.829	0.904	0.8	-0.321928	0.0262768
Q3ZCH5	Zinc-alpha-2-glycoprotein OS=Bos taurus OX=9913 GN=AZGP1 PE=2 SV=1	5	1.222	1.238	0.992	1.112	1.146	1.208	1.137	1.111	1.1415	0.975	1.077	0.772	0.886	1.042	1.019	1.041	0.814	0.997	0.873412	-0.195265	0.0200515
