# Supplementary material for: Integrated Metabolomics and Proteomics Dynamics of Serum Samples Reveals Dietary Zeolite Clinoptilolite Supplementation Restores Energy Balance in High Yielding Dairy Cows
Source: Metabolites. 2021 Dec 5;11(12):842. doi: 10.3390/metabo11120842 (PMC8705350; doi:10.3390/metabo11120842)
Supplement: Supplementary file 1 [file metabolites-11-00842-s001.zip › supplementary files/Supplementary Table S6.xlsx]

## Sheet: Sheet1
Supplementary Table S6. List of significant metabolites based on one-way ANOVA
Metabolites	Annotation	HMDB	PubChem	ChEBI	KEGG	30pre-C1	30pre-C2	30pre-C3	30pre-C4	30pre-C5	30pre-C6	30pre-C7	30pre-C8	10pre-C1	10pre-C2	10pre-C3	10pre-C4	10pre-C5	10pre-C6	10pre-C7	10pre-C8	5post-C1	5post-C2	5post-C3	5post-C4	5post-C5	5post-C6	5post-C7	5post-C8	26post-C1	26post-C2	26post-C3	26post-C4	26post-C5	26post-C6	26post-C7	26post-C8	30pre-S1	30pre-S2	30pre-S3	30pre-S4	30pre-S5	30pre-S6	30pre-S7	30pre-S8	10pre-S1	10pre-S2	10pre-S3	10pre-S4
(-)-Bornyl acetate	identified	HMDB0040397	6448	NA	NA	76362.4	90894.3	75547.2	68709.6	61595.6	78885	63850.5	79108	76052.9	78752.7	65333.5	63889.2	66364.3	84609.9	92349.7	44671.4	65743.4	80538.1	56871.4	62028.6	70401.1	53480.2	83910.6	71551.6	58390.6	36650.1	65737.9	57321.8	69636.9	59518	58123.4	29197.2	20682.8	28552	27393	19356.9	29384.6	34331.1	25908.6	27730.2	33053.5	27211.6	33980.7	23951.8
(+)-6-Hydroxy-2,6-dimethyl-7-octen-4-one		HMDB0039149	522417	NA	NA	403094	487353	495635	440662	329030	444513	463203	477301	503970	457144	413035	485976	370373	462660	608536	244537	382065	482415	408085	507728	526754	430094	599832	514565	407043	323168	416666	333202	431254	339426	338844	164164	125509	173980	161805	126286	154237	207961	131391	130946	231210	181746	183962	171513
(+)-Galeon		HMDB0031534	16116346	NA	NA	168293	191242	238324	248194	260242	255421	285170	194106	232787	208401	194614	238684	303154	336253	291686	226406	227152	336308	268883	338464	257795	268245	299406	266150	285317	243513	223190	288560	233458	235176	208015	196312	224927	187930	248024	238104	204304	186267	184343	159675	269333	186109	213827	244912
(+/-)-1-Acetoxy-1-ethoxyethane		HMDB0032158	97895	NA	NA	325808	397432	341500	309214	236865	242158	333978	275568	467726	339154	344064	309472	264954	371445	366957	203836	334007	327211	252096	272780	307163	293697	376911	401865	202274	237681	257716	213396	309933	338272	241916	120140	114052	122455	107787	123662	93379.2	107378	98495.5	152286	166687	134491	124153	123728
(+/-)-Ethyl 2-hydroxy-2-methylbutyrate		HMDB0032269	101536	NA	NA	178947	202640	177959	176880	112816	173479	219725	161563	273277	189127	228650	213593	210229	253332	274963	144766	244540	305105	161519	164374	199030	155352	294460	262924	137640	124669	141467	154233	156235	127113	184856	169043	156628	223479	188211	157163	138707	215150	175326	123081	144756	155229	166353	204260
(+/-)-Ethyl 3-acetoxy-2-methylbutyrate		HMDB0032258	263620	NA	NA	294161	292649	362573	312789	276612	353848	272464	259481	393119	293483	319734	351261	262288	349839	349010	166447	311050	322700	255503	271450	308555	225864	365407	437670	201540	246329	290636	247008	347563	270861	236362	197998	171490	187606	135506	174254	170424	241181	161755	196161	279967	248208	281390	219395
(+/-)-Methyl 5-acetoxyhexanoate		HMDB0032387	526152	NA	NA	294161	292649	362573	312789	276612	353848	272464	259481	393119	293483	319734	351261	262288	349839	349010	166447	311050	322700	255503	271450	308555	225864	365407	437670	201540	246329	290636	247008	347563	270861	236362	197998	171490	187606	135506	174254	170424	241181	161755	196161	279967	248208	281390	219395
(±)-(E)-2-Octen-4-ol		HMDB0031300	5366203	NA	NA	78455.7	65344.3	83608.7	64943.9	79512.6	59021.4	76686.4	92972.8	74609.5	87474	75396.3	67367.8	63850.3	54698.8	79092.8	38729	47039.2	65392.8	44689	66409.2	63031.6	53986.8	98142.6	87254.1	62420.1	47849	83815.5	49708.2	78847.6	48770.1	41515	62052.1	49549.7	69056.4	60690.3	35418	50869.3	53883.8	58666.7	42025.4	53045.4	79185.9	69060.6	54148.4
(±)-2-Pentanol acetate		HMDB0031600	12278	NA	NA	1932490	2.05705e+06	1.87968e+06	1.95561e+06	1428820	2018299	2321765	2.21171e+06	2.18895e+06	1.55261e+06	1.65363e+06	2.01794e+06	1.6277e+06	1.92967e+06	2949656	1.03395e+06	1.80162e+06	2.40727e+06	1.94378e+06	2.37845e+06	1.89925e+06	1.93736e+06	2.65658e+06	2244925	1.91416e+06	936736	1.58099e+06	1.48376e+06	1.76527e+06	1.55873e+06	1486326	2.97911e+06	2547794	4.40414e+06	3.04848e+06	2.59234e+06	2801523	2935630	3807720	2620054	2618856	3.38579e+06	3001957	3.93279e+06
(±)-3-Octyl acetate		HMDB0040167	521238	NA	NA	9949007	11504798	11419062	9327990	7611035	10557322	12258934	11924596	11121203	10087879	8976714	11839756	8963184	10683619	14898223	6.08635e+06	9378611	12510601	10533930	10980307	12879971	9452784	13969028	11505806	9738459	7.43292e+06	9378756	7251482	9339049	8226159	6.97687e+06	2.77864e+06	3.51156e+06	5.40678e+06	3.36879e+06	2.54327e+06	3.71239e+06	5.53706e+06	3.01635e+06	2.83467e+06	3.79552e+06	4814188	3.59266e+06	5.48434e+06
(±)-5-Hydroxy-4-octanone		HMDB0035457	219794	NA	NA	4954824	5.14197e+06	4.41919e+06	4.82049e+06	5765679	5892011	5.07004e+06	5464260	4797286	3.64796e+06	4.84736e+06	6130662	5.12007e+06	6475661	5.90411e+06	3081296	7.21951e+06	9157299	6169049	7.69341e+06	5.73703e+06	7005724	9996086	5.16342e+06	4.68692e+06	1.93052e+06	3824784	3377617	6.38554e+06	4767635	4082351	9323195	7.81657e+06	11156823	10348903	7223643	7.55598e+06	8117199	11308355	7875526	7821792	9446027	7832668	10037557
(±)-6-Methyl-5-hepten-2-yl acetate		HMDB0030031	87947	NA	NA	403094	487353	495635	440662	329030	444513	463203	477301	503970	457144	413035	485976	370373	462660	608536	244537	382065	482415	408085	507728	526754	430094	599832	514565	407043	323168	416666	333202	431254	339426	338844	164164	125509	173980	161805	126286	154237	207961	131391	130946	231210	181746	183962	171513
(±)-cis-Linalyl oxide		HMDB0040726	6428573	132839	NA	403094	487353	495635	440662	329030	444513	463203	477301	503970	457144	413035	485976	370373	462660	608536	244537	382065	482415	408085	507728	526754	430094	599832	514565	407043	323168	416666	333202	431254	339426	338844	164164	125509	173980	161805	126286	154237	207961	131391	130946	231210	181746	183962	171513
(±)-Myrtenyl acetate		HMDB0035126	61262	NA	NA	151667	125457	146408	122789	85130.3	115858	128881	98168.7	137868	129400	123148	102185	100871	126715	165295	93591.6	127904	128741	103532	117243	106050	126700	150913	131959	106466	83258.6	100243	96871.8	137405	128675	94347.1	95805.1	88245.5	50123.4	85965.7	102175	92384.1	103824	63369.8	133098	138871	97121	80252.8	93801.3
(±)-threo-Anethole glycol		HMDB0032607	3016654	NA	NA	115416	144676	117828	104242	72557.4	95585.6	98858.4	106646	173135	127044	115271	98442.7	116451	123768	114062	95435.7	103775	105280	104626	92420.2	115607	107699	125763	130080	103867	97847.6	106182	104907	128308	110472	101730	139555	249063	102972	151890	196520	177543	188691	128255	167549	180954	140185	129642	146301
(±)-trans-Linalyl oxide		HMDB0040727	6432254	NA	NA	403094	487353	495635	440662	329030	444513	463203	477301	503970	457144	413035	485976	370373	462660	608536	244537	382065	482415	408085	507728	526754	430094	599832	514565	407043	323168	416666	333202	431254	339426	338844	164164	125509	173980	161805	126286	154237	207961	131391	130946	231210	181746	183962	171513
(1'R)-Nepetalic acid		HMDB0036117	12313272	NA	NA	236569	258926	223046	204406	154475	230403	176635	169780	248465	204944	211817	186274	177115	219882	274925	109146	167775	176891	192287	180292	244220	175497	237336	260406	152139	122323	227688	165882	199742	166611	158105	112952	120662	131974	123097	110402	111195	158183	134849	119099	254653	150769	147078	103907
(1R,2S,3S,4R)-p-Menthane-2,3-diol		HMDB0035723	107175	NA	NA	9949007	11504798	11419062	9327990	7611035	10557322	12258934	11924596	11121203	10087879	8976714	11839756	8963184	10683619	14898223	6.08635e+06	9378611	12510601	10533930	10980307	12879971	9452784	13969028	11505806	9738459	7.43292e+06	9378756	7251482	9339049	8226159	6.97687e+06	2.77864e+06	3.51156e+06	5.40678e+06	3.36879e+06	2.54327e+06	3.71239e+06	5.53706e+06	3.01635e+06	2.83467e+06	3.79552e+06	4814188	3.59266e+06	5.48434e+06
(1S,3R,4R)-p-Menthane-1,3-diol		HMDB0037387	524005	NA	NA	9949007	11504798	11419062	9327990	7611035	10557322	12258934	11924596	11121203	10087879	8976714	11839756	8963184	10683619	14898223	6.08635e+06	9378611	12510601	10533930	10980307	12879971	9452784	13969028	11505806	9738459	7.43292e+06	9378756	7251482	9339049	8226159	6.97687e+06	2.77864e+06	3.51156e+06	5.40678e+06	3.36879e+06	2.54327e+06	3.71239e+06	5.53706e+06	3.01635e+06	2.83467e+06	3.79552e+06	4814188	3.59266e+06	5.48434e+06
(1xi,4xi,6xi)-Carvone oxide		HMDB0039382	100031	NA	NA	125608	137869	162940	113897	69438.4	111236	117134	113408	198233	166327	113129	95501.3	111009	147315	107696	60184.6	127233	122066	126081	85493.6	102991	85812.9	142585	174777	76043.9	70660.7	81507.4	79837	108682	119309	97758.3	119131	165126	126387	117883	174560	128250	242214	153779	147094	177844	156160	190980	161819
(2,2-Diethoxyethyl)benzene		HMDB0041610	80584	NA	NA	151667	125457	146408	122789	85130.3	115858	128881	98168.7	137868	129400	123148	102185	100871	126715	165295	93591.6	127904	128741	103532	117243	106050	126700	150913	131959	106466	83258.6	100243	96871.8	137405	128675	94347.1	95805.1	88245.5	50123.4	85965.7	102175	92384.1	103824	63369.8	133098	138871	97121	80252.8	93801.3
(2E,4E)-2,4-Octadien-1-ol		HMDB0040151	12180845	NA	NA	69843.6	78615.2	63940	66103.5	62192.9	55711	65202.7	80624	91736.6	102287	50228.8	65130.9	58881.1	62038.8	69958.4	29119.2	39570	55943.8	39152.8	67235.7	53858	44080.1	80048	64278.9	39105.8	43593.3	87947.1	53212.1	54701.4	51159.3	48326.9	56044.6	31629.5	61795.2	44705.4	41984	42903.3	57068.2	53858.8	30655.1	31250.8	62713.1	64284.5	50033.9
(2E,4E)-2,7-Dimethyl-2,4-octadienedioic acid		HMDB0034099	10954516	NA	NA	26771.8	26920.9	36438.9	27563.2	24175.7	26688.8	24814.6	19594.8	40371.3	37100.1	39233.9	39637.4	29362.7	31115.6	38607.5	16412.3	25980.1	26939.5	32274.7	22367.6	28163.7	35621.6	23877.7	38096.1	19653.9	26501.9	29459.1	21171.9	44009.7	33353.9	20259	25953.2	57428.5	33063.5	35804	39932.4	30209.2	74966.6	29082.6	22442.6	32136	55650.3	64242.3	46928
(2'E,4'Z,8E)-Colneleic acid		HMDB0030995	6441681	60956	C19827	109803	68765.2	152432	103728	96054.6	105065	184247	175878	152240	131321	111445	172128	165379	151450	127642	155512	119241	140214	114824	115476	180514	167263	118973	137815	118296	326696	181050	88933.3	171286	156978	63798.6	68099.2	46489.8	85053.5	80878.2	80988	69600.5	78959.3	64104.3	49585	127516	62877.4	111900	89391.9
(2E,6Z)-2,6-Nonadien-1-Yl acetate		HMDB0038079	124355621	NA	NA	62901	81140.9	63751.9	53882.4	39100.1	62278.2	74057.7	60978.1	56959.7	74157.6	67350.2	47522.9	57724.4	60781.4	106842	41259.9	61908	51837.9	39395.9	60619.9	48616.9	50778.8	65848.1	62783.6	39505.9	48705.6	49136.2	63438.6	65372.2	52545.7	48950.1	67099.3	101052	70110.2	69982.7	71691.4	87464.8	90415	71403.1	64993.5	88957	49645.8	96000.2	69621.5
(2R,3S)-2-methyl-3-propyloxirane		HMDB0062792	10931377	84216	NA	68246.8	83025.3	90228.6	82355.9	60371	52449.1	65304.2	57858.9	73487.2	61006.2	63588.6	72858.2	68669.2	66007.4	80947.1	43598.9	51475	60406.7	59755.3	74676.6	64620.4	56799.2	82646.3	83299.2	57985.2	33929.2	55306.2	56844.3	73361	64224.9	68825.9	47325.6	47134.3	59048.8	58439	46417.4	50584.9	58185.1	45011.6	42323.3	47624.8	60008.5	61950.2	49526.8
(2S)-2-Ethylhexyl acetate		HMDB0061805	10654786	88553	NA	9949007	11504798	11419062	9327990	7611035	10557322	12258934	11924596	11121203	10087879	8976714	11839756	8963184	10683619	14898223	6.08635e+06	9378611	12510601	10533930	10980307	12879971	9452784	13969028	11505806	9738459	7.43292e+06	9378756	7251482	9339049	8226159	6.97687e+06	2.77864e+06	3.51156e+06	5.40678e+06	3.36879e+06	2.54327e+06	3.71239e+06	5.53706e+06	3.01635e+06	2.83467e+06	3.79552e+06	4814188	3.59266e+06	5.48434e+06
(2S,4R)-p-Mentha-1(7),5-dien-2-ol acetate		HMDB0035801	101413668	NA	NA	151667	125457	146408	122789	85130.3	115858	128881	98168.7	137868	129400	123148	102185	100871	126715	165295	93591.6	127904	128741	103532	117243	106050	126700	150913	131959	106466	83258.6	100243	96871.8	137405	128675	94347.1	95805.1	88245.5	50123.4	85965.7	102175	92384.1	103824	63369.8	133098	138871	97121	80252.8	93801.3
(3beta,6beta)-Furanoeremophilane-3,6-diol		HMDB0035117	12309961	NA	NA	79405.7	77014.7	64615.2	39276.2	49065.4	71669	52334.1	48857.7	65720.5	61057.7	61368.5	54725.2	46640.6	60385.6	62399.3	32300.1	52296	59950.6	39955.8	50356.4	52315.6	48547.6	48548.1	67934.1	40279.2	36668	51899.8	50269.3	52144.6	43672.2	42031.2	41954.3	45226.5	30687.1	34369.8	24898.6	24785	43373.5	26671.4	27065.9	34819.1	37909.8	39824.1	33989.1
(3beta,8beta)-3-Hydroxy-7(11)-eremophilen-12,8-olide		HMDB0040754	73189506	NA	NA	79405.7	77014.7	64615.2	39276.2	49065.4	71669	52334.1	48857.7	65720.5	61057.7	61368.5	54725.2	46640.6	60385.6	62399.3	32300.1	52296	59950.6	39955.8	50356.4	52315.6	48547.6	48548.1	67934.1	40279.2	36668	51899.8	50269.3	52144.6	43672.2	42031.2	41954.3	45226.5	30687.1	34369.8	24898.6	24785	43373.5	26671.4	27065.9	34819.1	37909.8	39824.1	33989.1
(3E)-2-Propylpent-3-enoic acid		HMDB0013904	6439747	NA	NA	83695.1	81917.4	77648.2	93430.8	73293.4	78218.4	68261.6	59883.3	90296.4	81380.4	70828.3	77336.6	97751.7	61165.1	67996.6	57721.5	53827.8	67794.3	54063.9	75450.4	74457.6	60976.8	80425.2	78154.1	69819.7	69619.7	68942.2	62732.9	85502.3	69160.2	69030.1	82340.9	77460.4	97448.3	74460.6	78421.1	63975.1	80083.7	69837.5	63781.6	79658	96205.2	84787.9	84959.9
(3E,5Z)-3,5-Octadien-1-ol		HMDB0040149	87170471	NA	NA	69843.6	78615.2	63940	66103.5	62192.9	55711	65202.7	80624	91736.6	102287	50228.8	65130.9	58881.1	62038.8	69958.4	29119.2	39570	55943.8	39152.8	67235.7	53858	44080.1	80048	64278.9	39105.8	43593.3	87947.1	53212.1	54701.4	51159.3	48326.9	56044.6	31629.5	61795.2	44705.4	41984	42903.3	57068.2	53858.8	30655.1	31250.8	62713.1	64284.5	50033.9
(3E,6Z)-Nonadien-1-yl acetate		HMDB0038068	71587638	NA	NA	62901	81140.9	63751.9	53882.4	39100.1	62278.2	74057.7	60978.1	56959.7	74157.6	67350.2	47522.9	57724.4	60781.4	106842	41259.9	61908	51837.9	39395.9	60619.9	48616.9	50778.8	65848.1	62783.6	39505.9	48705.6	49136.2	63438.6	65372.2	52545.7	48950.1	67099.3	101052	70110.2	69982.7	71691.4	87464.8	90415	71403.1	64993.5	88957	49645.8	96000.2	69621.5
(3-Methylphenyl)methyl acetate		HMDB0041473	87083	NA	C07216	319857	360362	339209	294864	228467	318225	320920	294556	366724	307306	281947	314430	291533	318799	391287	246331	823553	543953	325456	761641	329494	277535	871394	326916	267529	187581	292959	203942	315391	243716	205839	82776.2	110117	97077.6	225574	51406.6	43058.9	110897	113319	57713.3	64605.6	159978	94811.4	64758.7
(3R,3aR,7aS)-3-Butylhexahydro-1(3H)-isobenzofuranone		HMDB0034903	12367055	NA	NA	76362.4	90894.3	75547.2	68709.6	61595.6	78885	63850.5	79108	76052.9	78752.7	65333.5	63889.2	66364.3	84609.9	92349.7	44671.4	65743.4	80538.1	56871.4	62028.6	70401.1	53480.2	83910.6	71551.6	58390.6	36650.1	65737.9	57321.8	69636.9	59518	58123.4	29197.2	20682.8	28552	27393	19356.9	29384.6	34331.1	25908.6	27730.2	33053.5	27211.6	33980.7	23951.8
(3R,5Z)-5-Octene-1,3-diol		HMDB0030368	21159437	NA	NA	4954824	5.14197e+06	4.41919e+06	4.82049e+06	5765679	5892011	5.07004e+06	5464260	4797286	3.64796e+06	4.84736e+06	6130662	5.12007e+06	6475661	5.90411e+06	3081296	7.21951e+06	9157299	6169049	7.69341e+06	5.73703e+06	7005724	9996086	5.16342e+06	4.68692e+06	1.93052e+06	3824784	3377617	6.38554e+06	4767635	4082351	9323195	7.81657e+06	11156823	10348903	7223643	7.55598e+06	8117199	11308355	7875526	7821792	9446027	7832668	10037557
(3S)-3-Isopropenyl-6-oxoheptanoate		METPA1020	NA	211	C11419	236569	258926	223046	204406	154475	230403	176635	169780	248465	204944	211817	186274	177115	219882	274925	109146	167775	176891	192287	180292	244220	175497	237336	260406	152139	122323	227688	165882	199742	166611	158105	112952	120662	131974	123097	110402	111195	158183	134849	119099	254653	150769	147078	103907
(3S,5R,6R,7E)-3,5,6-Trihydroxy-7-megastigmen-9-one		HMDB0038736	51136538	NA	NA	52517.3	46409.8	37050.9	37809.2	35787	35769.9	40111.4	33464.5	53066.4	45906.7	43847.5	37856.4	38225.2	37606.8	42922.2	26722.2	32825.7	46026.3	25774.5	33734.2	31340	35377.9	48868.9	59243.7	28872.7	33640.5	33846.3	27317.9	42341.6	52820.3	27772	31524.8	29703.6	20414.5	19789.3	24898.2	28462.8	38611.5	24562.9	21288.6	22145.1	27306.4	36625.4	18940.6
(4S)-4,6-Dihydroxy-2,5-dioxohexanoate		METPA0489	NA	15623	C04349	86009.7	53816.3	96898.4	158729	17359.2	22047.2	20894.4	15473	126020	219010	296910	33325.7	21528.4	355547	16976	21381	22904.3	42743.3	39629.5	31104.8	223303	161438	88976.9	116273	25044.4	26441.2	38892	12461.4	130659	17680.8	16443	95101.7	276626	156565	136583	95205.2	242368	68085.4	106681	93256.6	325512	160949	153976	183997
(4S,8R)-8,9-Dihydroxy-p-menth-1(6)-en-2-one		HMDB0039052	73120805	NA	NA	236569	258926	223046	204406	154475	230403	176635	169780	248465	204944	211817	186274	177115	219882	274925	109146	167775	176891	192287	180292	244220	175497	237336	260406	152139	122323	227688	165882	199742	166611	158105	112952	120662	131974	123097	110402	111195	158183	134849	119099	254653	150769	147078	103907
(6beta,8alpha)-6-Hydroxy-7(11)-eremophilen-12,8-olide		HMDB0035148	14866156	NA	NA	79405.7	77014.7	64615.2	39276.2	49065.4	71669	52334.1	48857.7	65720.5	61057.7	61368.5	54725.2	46640.6	60385.6	62399.3	32300.1	52296	59950.6	39955.8	50356.4	52315.6	48547.6	48548.1	67934.1	40279.2	36668	51899.8	50269.3	52144.6	43672.2	42031.2	41954.3	45226.5	30687.1	34369.8	24898.6	24785	43373.5	26671.4	27065.9	34819.1	37909.8	39824.1	33989.1
(7'x,8'x)-4,7'-Epoxy-3,8'-bilign-7-ene-3,5'-dimethoxy-4',9,9'-triol		HMDB0041276	131753094	NA	NA	25088.2	28424.6	31842.8	25097.1	39484.9	31643.6	30465.5	44049.1	30460.6	25144.5	26152.2	26935.1	30084.8	28325	29504.2	43233.8	53112.1	44789.8	39069.8	53137.9	35706.9	35725.4	45762	25718.4	22948.8	37598	29005.2	22511.4	41954.9	25144.6	30681.8	28306.7	31779.5	31078.1	22328.9	39238.7	25044.3	22516.7	32336.8	35382.9	28293.2	29937.1	28883	32239.4
(9S,10E,12Z,15Z)-9-Hydroxy-10,12,15-octadecatrienoic acid		HMDB0031934	13917187	89388	NA	109803	68765.2	152432	103728	96054.6	105065	184247	175878	152240	131321	111445	172128	165379	151450	127642	155512	119241	140214	114824	115476	180514	167263	118973	137815	118296	326696	181050	88933.3	171286	156978	63798.6	68099.2	46489.8	85053.5	80878.2	80988	69600.5	78959.3	64104.3	49585	127516	62877.4	111900	89391.9
(9Z,12Z,14E)-16-Hydroxy-9,12,14-octadecatrienoic acid		HMDB0034586	13917179	NA	NA	109803	68765.2	152432	103728	96054.6	105065	184247	175878	152240	131321	111445	172128	165379	151450	127642	155512	119241	140214	114824	115476	180514	167263	118973	137815	118296	326696	181050	88933.3	171286	156978	63798.6	68099.2	46489.8	85053.5	80878.2	80988	69600.5	78959.3	64104.3	49585	127516	62877.4	111900	89391.9
(E)-10-Oxo-8-decenoic acid		HMDB0040883	12431569	NA	NA	236569	258926	223046	204406	154475	230403	176635	169780	248465	204944	211817	186274	177115	219882	274925	109146	167775	176891	192287	180292	244220	175497	237336	260406	152139	122323	227688	165882	199742	166611	158105	112952	120662	131974	123097	110402	111195	158183	134849	119099	254653	150769	147078	103907
(E)-2-Hexenyl butyrate		HMDB0034581	5352461	NA	NA	403094	487353	495635	440662	329030	444513	463203	477301	503970	457144	413035	485976	370373	462660	608536	244537	382065	482415	408085	507728	526754	430094	599832	514565	407043	323168	416666	333202	431254	339426	338844	164164	125509	173980	161805	126286	154237	207961	131391	130946	231210	181746	183962	171513
(E)-2-octenal		HMDB0013809	16900	61725	C21138	69843.6	78615.2	63940	66103.5	62192.9	55711	65202.7	80624	91736.6	102287	50228.8	65130.9	58881.1	62038.8	69958.4	29119.2	39570	55943.8	39152.8	67235.7	53858	44080.1	80048	64278.9	39105.8	43593.3	87947.1	53212.1	54701.4	51159.3	48326.9	56044.6	31629.5	61795.2	44705.4	41984	42903.3	57068.2	53858.8	30655.1	31250.8	62713.1	64284.5	50033.9
(E)-3-(Tetrahydro-5,5-dimethyl-2-furanyl)-2-buten-1-ol		HMDB0035839	131751871	NA	NA	403094	487353	495635	440662	329030	444513	463203	477301	503970	457144	413035	485976	370373	462660	608536	244537	382065	482415	408085	507728	526754	430094	599832	514565	407043	323168	416666	333202	431254	339426	338844	164164	125509	173980	161805	126286	154237	207961	131391	130946	231210	181746	183962	171513
(E)-3-Heptenyl 2-methylpropanoate		HMDB0032308	6437137	48944	NA	309034	320740	293821	269294	217104	283689	311343	362226	288594	268578	271059	298196	265667	311945	376786	205478	259773	331045	247427	291458	327829	265874	391031	354682	286991	228648	301005	247328	305922	248143	192236	79297.4	74478.3	86984.4	87988.8	61451.4	63170	86007.9	65822.3	57758.6	138894	79557.3	69502.4	59403.4
(E)-3-Octen-1-ol		HMDB0035768	5364475	NA	NA	78455.7	65344.3	83608.7	64943.9	79512.6	59021.4	76686.4	92972.8	74609.5	87474	75396.3	67367.8	63850.3	54698.8	79092.8	38729	47039.2	65392.8	44689	66409.2	63031.6	53986.8	98142.6	87254.1	62420.1	47849	83815.5	49708.2	78847.6	48770.1	41515	62052.1	49549.7	69056.4	60690.3	35418	50869.3	53883.8	58666.7	42025.4	53045.4	79185.9	69060.6	54148.4
(E)-4-Hexen-1-ol		HMDB0031502	5365589	NA	NA	68246.8	83025.3	90228.6	82355.9	60371	52449.1	65304.2	57858.9	73487.2	61006.2	63588.6	72858.2	68669.2	66007.4	80947.1	43598.9	51475	60406.7	59755.3	74676.6	64620.4	56799.2	82646.3	83299.2	57985.2	33929.2	55306.2	56844.3	73361	64224.9	68825.9	47325.6	47134.3	59048.8	58439	46417.4	50584.9	58185.1	45011.6	42323.3	47624.8	60008.5	61950.2	49526.8
(E)-4-Octenoic acid		HMDB0039793	6433715	37316	NA	83695.1	81917.4	77648.2	93430.8	73293.4	78218.4	68261.6	59883.3	90296.4	81380.4	70828.3	77336.6	97751.7	61165.1	67996.6	57721.5	53827.8	67794.3	54063.9	75450.4	74457.6	60976.8	80425.2	78154.1	69819.7	69619.7	68942.2	62732.9	85502.3	69160.2	69030.1	82340.9	77460.4	97448.3	74460.6	78421.1	63975.1	80083.7	69837.5	63781.6	79658	96205.2	84787.9	84959.9
(E,E)-11,13-Octadecadien-9-ynoic acid		HMDB0034382	131751554	NA	NA	68029.5	56685.5	83613	62422.6	54161.3	77995.1	71818.2	67650.1	61443.4	54447.4	63161	79604.1	78711.9	67863.5	72375.7	59657.3	69928.1	75208.9	58670.3	96465.3	70390.8	89965.6	108794	102279	40698.4	115174	82173.8	50248.8	69725.4	74771.1	57119.8	43977.6	53785.6	80043.4	32389.3	50028.1	40109.9	61678.4	42807.7	35329.6	84726.8	39409.2	71865.1	45519.9
(R)-2-Acetoxy-p-mentha-1,8-diene		HMDB0037389	101413597	NA	NA	151667	125457	146408	122789	85130.3	115858	128881	98168.7	137868	129400	123148	102185	100871	126715	165295	93591.6	127904	128741	103532	117243	106050	126700	150913	131959	106466	83258.6	100243	96871.8	137405	128675	94347.1	95805.1	88245.5	50123.4	85965.7	102175	92384.1	103824	63369.8	133098	138871	97121	80252.8	93801.3
(R)-8-Acetoxycarvotanacetone		HMDB0037104	538920	NA	NA	129910	200657	136149	143441	110841	106274	124970	122974	172603	139528	177380	116521	141232	166104	150430	114007	126911	121054	112873	147478	135178	104421	127424	161358	133453	116070	120216	132449	130616	158179	106165	86615.2	128697	53984.3	137265	135435	108067	154684	92932.5	66043.6	87558.5	98998.5	163012	58335.4
(R)-Lactate	identified+fragment	HMDB0000190	107689	422	C00186	34604040	32366062	29686998	28032482	33920504	37309564	37693416	62224104	26912984	29790164	39323216	35144460	36549092	78211616	48374172	64851360	47586364	55510288	47541176	95735264	40326796	34245000	88165760	37155892	33809576	42927720	39803268	31499218	40889440	28879110	28979262	36533772	24347202	30594836	27474300	36138668	28200484	18962858	24667236	19444306	50020192	24658152	19440104	25157594
(R)-Malate		HMDB0031518	92824	30796	C00497	1.1477e+06	814630	1.04021e+06	1.13572e+06	1.39133e+06	1.70645e+06	1.35789e+06	1520693	1.18449e+06	1.01964e+06	1.11704e+06	953884	1.01303e+06	1.90119e+06	1.37121e+06	1.61691e+06	1.10011e+06	1.92322e+06	1.19098e+06	6.7437e+06	2.19677e+06	1.62053e+06	2.97792e+06	1.80551e+06	1.51736e+06	946639	1019497	1.06907e+06	1.90511e+06	1.09838e+06	1.51492e+06	1.28486e+06	912716	1.1859e+06	1.11857e+06	764067	1179725	742611	1.23195e+06	1.16468e+06	1.56927e+06	1.04154e+06	947895	954812
(R)-Pelletierine		HMDB0030324	3034881	NA	NA	52320.8	61739.3	101428	67150.9	60563.1	64199.4	67604.7	60784.1	70883.8	60191.7	93304.4	64410.6	52032.8	59532.5	89100.9	43664.7	75606.8	59970.1	60348.8	53988.4	61945.6	58399.6	77023.5	121753	47671.7	73549.5	58866.2	67264.2	75975.6	64832.2	48545.5	50179.4	55873.4	45179.2	39439.4	46051.3	42504.8	63464.7	45918.3	37959.7	59419.5	47484.8	76015.4	43499.8
(S)-4',5,7-Trihydroxy-6-prenylflavanone		HMDB0037247	3519901	NA	C09832	34603.2	21859.4	32142.9	30793.5	29032.4	30646.3	32753.5	28928.7	26253.6	29156.7	33137.4	30177.1	34340.1	30020	37457.9	37909.2	35543	37206.3	42986.1	62836.8	45690.9	33397.3	46512.1	44434.3	38034.6	40741.5	32746.2	29033.5	37974.5	21926.9	27766.9	42830.6	38999.8	28534.6	22753.4	24995.9	23249.5	32167.5	38518.3	38379	42153.3	30342.7	29325	37245.7
(S)-Acetoin		METPA0219	NA	15687	C01769	1.81681e+06	3.93966e+06	3.59409e+06	2.58079e+06	5230106	3.68656e+06	3.15884e+06	8167922	4.58022e+06	1954573	2.92624e+06	4.00314e+06	3389748	3132904	2582963	9731120	10018303	5151012	6330369	3845188	2.88542e+06	4.81403e+06	6.51737e+06	4.97457e+06	3.19513e+06	1.70177e+06	1.55845e+06	1.46756e+06	3.25844e+06	3548256	4.26544e+06	2.62526e+06	1.84804e+06	2.4178e+06	4.01632e+06	1.97717e+06	1.1697e+06	2.51153e+06	2.17896e+06	2.37436e+06	2.21259e+06	4.11471e+06	3.60204e+06	1.77517e+06
(S)-Homostachydrine	identified	HMDB0033433	441447	NA	C08283	4.5313e+06	3794154	2.56301e+06	7.90164e+06	3.2839e+06	2.90023e+06	2.13176e+06	1.07079e+06	8.21749e+06	7171700	2308041	4805048	5.30401e+06	1.36602e+06	2.2637e+06	954177	4.66533e+06	5.63257e+06	1.72939e+06	4797653	5716705	5707570	5.92995e+06	4976579	2.26501e+06	8696261	2.10192e+06	2666826	2.76841e+06	1.58912e+06	793022	3136434	14031907	5.7046e+06	5361634	5991087	3.23842e+06	5284551	2625961	10034943	3.52254e+06	5.09256e+06	8.28024e+06	10454888
(S)-Malate	identified+fragment	HMDB0000156	222656	30797	C00149	1.1477e+06	814630	1.04021e+06	1.13572e+06	1.39133e+06	1.70645e+06	1.35789e+06	1520693	1.18449e+06	1.01964e+06	1.11704e+06	953884	1.01303e+06	1.90119e+06	1.37121e+06	1.61691e+06	1.10011e+06	1.92322e+06	1.19098e+06	6.7437e+06	2.19677e+06	1.62053e+06	2.97792e+06	1.80551e+06	1.51736e+06	946639	1019497	1.06907e+06	1.90511e+06	1.09838e+06	1.51492e+06	1.28486e+06	912716	1.1859e+06	1.11857e+06	764067	1179725	742611	1.23195e+06	1.16468e+06	1.56927e+06	1.04154e+06	947895	954812
(S)-Neolyratyl acetate		HMDB0041497	101413630	NA	NA	151667	125457	146408	122789	85130.3	115858	128881	98168.7	137868	129400	123148	102185	100871	126715	165295	93591.6	127904	128741	103532	117243	106050	126700	150913	131959	106466	83258.6	100243	96871.8	137405	128675	94347.1	95805.1	88245.5	50123.4	85965.7	102175	92384.1	103824	63369.8	133098	138871	97121	80252.8	93801.3
(S)-Oleuropeic acid		HMDB0036998	12313716	NA	NA	236569	258926	223046	204406	154475	230403	176635	169780	248465	204944	211817	186274	177115	219882	274925	109146	167775	176891	192287	180292	244220	175497	237336	260406	152139	122323	227688	165882	199742	166611	158105	112952	120662	131974	123097	110402	111195	158183	134849	119099	254653	150769	147078	103907
(S)-p-Mentha-1,8-dien-10-yl acetate		HMDB0037018	61781	NA	NA	151667	125457	146408	122789	85130.3	115858	128881	98168.7	137868	129400	123148	102185	100871	126715	165295	93591.6	127904	128741	103532	117243	106050	126700	150913	131959	106466	83258.6	100243	96871.8	137405	128675	94347.1	95805.1	88245.5	50123.4	85965.7	102175	92384.1	103824	63369.8	133098	138871	97121	80252.8	93801.3
(S)-Santolina acetate		HMDB0041494	21630872	NA	NA	76362.4	90894.3	75547.2	68709.6	61595.6	78885	63850.5	79108	76052.9	78752.7	65333.5	63889.2	66364.3	84609.9	92349.7	44671.4	65743.4	80538.1	56871.4	62028.6	70401.1	53480.2	83910.6	71551.6	58390.6	36650.1	65737.9	57321.8	69636.9	59518	58123.4	29197.2	20682.8	28552	27393	19356.9	29384.6	34331.1	25908.6	27730.2	33053.5	27211.6	33980.7	23951.8
(S,E)-2,6-Dimethyl-5,7-octadiene-2,3-diol		HMDB0035122	89802642	NA	NA	403094	487353	495635	440662	329030	444513	463203	477301	503970	457144	413035	485976	370373	462660	608536	244537	382065	482415	408085	507728	526754	430094	599832	514565	407043	323168	416666	333202	431254	339426	338844	164164	125509	173980	161805	126286	154237	207961	131391	130946	231210	181746	183962	171513
(S,E)-Filbertone		HMDB0035242	89357606	NA	NA	69843.6	78615.2	63940	66103.5	62192.9	55711	65202.7	80624	91736.6	102287	50228.8	65130.9	58881.1	62038.8	69958.4	29119.2	39570	55943.8	39152.8	67235.7	53858	44080.1	80048	64278.9	39105.8	43593.3	87947.1	53212.1	54701.4	51159.3	48326.9	56044.6	31629.5	61795.2	44705.4	41984	42903.3	57068.2	53858.8	30655.1	31250.8	62713.1	64284.5	50033.9
(S,Z)-Lyratol acetate		HMDB0031840	6427141	NA	NA	151667	125457	146408	122789	85130.3	115858	128881	98168.7	137868	129400	123148	102185	100871	126715	165295	93591.6	127904	128741	103532	117243	106050	126700	150913	131959	106466	83258.6	100243	96871.8	137405	128675	94347.1	95805.1	88245.5	50123.4	85965.7	102175	92384.1	103824	63369.8	133098	138871	97121	80252.8	93801.3
(x)-1-Nonen-3-yl acetate		HMDB0037106	169364	NA	NA	309034	320740	293821	269294	217104	283689	311343	362226	288594	268578	271059	298196	265667	311945	376786	205478	259773	331045	247427	291458	327829	265874	391031	354682	286991	228648	301005	247328	305922	248143	192236	79297.4	74478.3	86984.4	87988.8	61451.4	63170	86007.9	65822.3	57758.6	138894	79557.3	69502.4	59403.4
(Z)-1-(1-Ethoxyethoxy)-3-hexene		HMDB0038783	5463962	NA	NA	9949007	11504798	11419062	9327990	7611035	10557322	12258934	11924596	11121203	10087879	8976714	11839756	8963184	10683619	14898223	6.08635e+06	9378611	12510601	10533930	10980307	12879971	9452784	13969028	11505806	9738459	7.43292e+06	9378756	7251482	9339049	8226159	6.97687e+06	2.77864e+06	3.51156e+06	5.40678e+06	3.36879e+06	2.54327e+06	3.71239e+06	5.53706e+06	3.01635e+06	2.83467e+06	3.79552e+06	4814188	3.59266e+06	5.48434e+06
(Z)-3-Hexenyl 3-methylbutanoate		HMDB0038278	5367681	NA	NA	309034	320740	293821	269294	217104	283689	311343	362226	288594	268578	271059	298196	265667	311945	376786	205478	259773	331045	247427	291458	327829	265874	391031	354682	286991	228648	301005	247328	305922	248143	192236	79297.4	74478.3	86984.4	87988.8	61451.4	63170	86007.9	65822.3	57758.6	138894	79557.3	69502.4	59403.4
(Z)-3-Methyl-3-decenoic acid		HMDB0031062	129711116	NA	NA	309034	320740	293821	269294	217104	283689	311343	362226	288594	268578	271059	298196	265667	311945	376786	205478	259773	331045	247427	291458	327829	265874	391031	354682	286991	228648	301005	247328	305922	248143	192236	79297.4	74478.3	86984.4	87988.8	61451.4	63170	86007.9	65822.3	57758.6	138894	79557.3	69502.4	59403.4
(Z)-3-Methyl-4-decenoic acid		HMDB0031063	131751127	NA	NA	309034	320740	293821	269294	217104	283689	311343	362226	288594	268578	271059	298196	265667	311945	376786	205478	259773	331045	247427	291458	327829	265874	391031	354682	286991	228648	301005	247328	305922	248143	192236	79297.4	74478.3	86984.4	87988.8	61451.4	63170	86007.9	65822.3	57758.6	138894	79557.3	69502.4	59403.4
(Z)-3-Oxo-2-(2-pentenyl)-1-cyclopenteneacetic acid		HMDB0030197	14262444	NA	NA	45176	45628.5	51174	34194	22415.2	39135.1	26801.2	24636.3	51815.2	50444.6	31284.9	41873.3	35140.4	29461.5	47013	20175.3	37899.1	26876.7	29734.7	20121.4	28143	43389.1	50165.4	39652.5	30522.9	30218.9	27476.8	26820.2	48262.9	25679.8	29160.9	62292.7	47120.5	31420	45543.4	82195.1	40295.9	108252	45469.3	33411.6	79106	53372.2	123836	40799.1
(Z)-4-Hydroxy-6-dodecenoic acid lactone		HMDB0032331	5352428	16165	C03107	76362.4	90894.3	75547.2	68709.6	61595.6	78885	63850.5	79108	76052.9	78752.7	65333.5	63889.2	66364.3	84609.9	92349.7	44671.4	65743.4	80538.1	56871.4	62028.6	70401.1	53480.2	83910.6	71551.6	58390.6	36650.1	65737.9	57321.8	69636.9	59518	58123.4	29197.2	20682.8	28552	27393	19356.9	29384.6	34331.1	25908.6	27730.2	33053.5	27211.6	33980.7	23951.8
(Z)-5-Octen-1-ol		HMDB0031298	5352837	NA	NA	78455.7	65344.3	83608.7	64943.9	79512.6	59021.4	76686.4	92972.8	74609.5	87474	75396.3	67367.8	63850.3	54698.8	79092.8	38729	47039.2	65392.8	44689	66409.2	63031.6	53986.8	98142.6	87254.1	62420.1	47849	83815.5	49708.2	78847.6	48770.1	41515	62052.1	49549.7	69056.4	60690.3	35418	50869.3	53883.8	58666.7	42025.4	53045.4	79185.9	69060.6	54148.4
[2,2-Bis(2-methylpropoxy)ethyl]benzene		HMDB0037712	71544	NA	NA	57686.3	42243	55680.2	64115.4	42503.2	48020.7	54456.1	49915.8	39639.3	60338.1	44077.1	57743.2	72149.4	55273.9	49064	37872.8	46149.4	67021.4	45292.4	49797.5	59586.7	47713.2	75207	67767.6	44484.4	78105.1	53304.5	40708.8	73095.9	47636.5	41799.9	34086.3	42438.1	59635.5	27559.1	40490.9	39147.1	40195.3	33113.7	35500.3	62696.6	44071.9	70802.5	28407.8
1-(1-Pyrrolidinyl)-2-butanone		HMDB0039839	15801221	NA	NA	52320.8	61739.3	101428	67150.9	60563.1	64199.4	67604.7	60784.1	70883.8	60191.7	93304.4	64410.6	52032.8	59532.5	89100.9	43664.7	75606.8	59970.1	60348.8	53988.4	61945.6	58399.6	77023.5	121753	47671.7	73549.5	58866.2	67264.2	75975.6	64832.2	48545.5	50179.4	55873.4	45179.2	39439.4	46051.3	42504.8	63464.7	45918.3	37959.7	59419.5	47484.8	76015.4	43499.8
1-(2,3-Dihydro-6,7-dimethyl-1H-pyrrolizin-5-yl)-2-hydroxy-1-propanone		HMDB0040010	86127015	NA	NA	32420.9	43280.4	26206.3	49080.1	20982.1	22069	26640.2	20776.8	50481.2	56027.7	53665.4	17431.4	28567	23165.1	34205.3	30951.5	25629	26219.5	24845.2	33385.4	20806.8	31960.3	34840.1	31967.8	26431.4	18950.6	21595.4	22393.1	30885.8	23951.7	23900.5	33052.4	40310.4	48553.1	59228.2	57792.9	54889.8	75622.8	46341.9	42194.2	34459.3	42431.4	113727	50714
1-(2-Furanyl)-1-octanone		HMDB0040439	228593	NA	NA	151667	125457	146408	122789	85130.3	115858	128881	98168.7	137868	129400	123148	102185	100871	126715	165295	93591.6	127904	128741	103532	117243	106050	126700	150913	131959	106466	83258.6	100243	96871.8	137405	128675	94347.1	95805.1	88245.5	50123.4	85965.7	102175	92384.1	103824	63369.8	133098	138871	97121	80252.8	93801.3
1-(4-Hydroxy-3-methoxyphenyl)-7-phenyl-3,5-heptanedione		HMDB0033710	13337758	NA	NA	168293	191242	238324	248194	260242	255421	285170	194106	232787	208401	194614	238684	303154	336253	291686	226406	227152	336308	268883	338464	257795	268245	299406	266150	285317	243513	223190	288560	233458	235176	208015	196312	224927	187930	248024	238104	204304	186267	184343	159675	269333	186109	213827	244912
1-(4-Methoxyphenyl)-2-propanone		HMDB0032891	31231	NA	NA	319857	360362	339209	294864	228467	318225	320920	294556	366724	307306	281947	314430	291533	318799	391287	246331	823553	543953	325456	761641	329494	277535	871394	326916	267529	187581	292959	203942	315391	243716	205839	82776.2	110117	97077.6	225574	51406.6	43058.9	110897	113319	57713.3	64605.6	159978	94811.4	64758.7
1,1-Diethoxy-2-hexene		HMDB0029760	5365137	NA	NA	9949007	11504798	11419062	9327990	7611035	10557322	12258934	11924596	11121203	10087879	8976714	11839756	8963184	10683619	14898223	6.08635e+06	9378611	12510601	10533930	10980307	12879971	9452784	13969028	11505806	9738459	7.43292e+06	9378756	7251482	9339049	8226159	6.97687e+06	2.77864e+06	3.51156e+06	5.40678e+06	3.36879e+06	2.54327e+06	3.71239e+06	5.53706e+06	3.01635e+06	2.83467e+06	3.79552e+06	4814188	3.59266e+06	5.48434e+06
1,1-Dimethoxy-2-phenylethane		HMDB0032615	60995	NA	NA	125608	137869	162940	113897	69438.4	111236	117134	113408	198233	166327	113129	95501.3	111009	147315	107696	60184.6	127233	122066	126081	85493.6	102991	85812.9	142585	174777	76043.9	70660.7	81507.4	79837	108682	119309	97758.3	119131	165126	126387	117883	174560	128250	242214	153779	147094	177844	156160	190980	161819
1,1-Dimethoxy-trans-2-hexene		HMDB0032225	6436486	NA	NA	4954824	5.14197e+06	4.41919e+06	4.82049e+06	5765679	5892011	5.07004e+06	5464260	4797286	3.64796e+06	4.84736e+06	6130662	5.12007e+06	6475661	5.90411e+06	3081296	7.21951e+06	9157299	6169049	7.69341e+06	5.73703e+06	7005724	9996086	5.16342e+06	4.68692e+06	1.93052e+06	3824784	3377617	6.38554e+06	4767635	4082351	9323195	7.81657e+06	11156823	10348903	7223643	7.55598e+06	8117199	11308355	7875526	7821792	9446027	7832668	10037557
1,2,3,4-Tetramethoxy-5-(2-propenyl)benzene		HMDB0034046	617233	NA	NA	106897	131868	94182.7	93200.2	79294.4	84049.4	85072	88079.5	136130	100280	100662	165391	96240.7	104615	99710.7	72071.4	108743	96826.8	75823.8	73681.8	87992.8	97552.6	124133	112614	86615	72053	108824	86609.7	111233	89758.6	107850	55587.6	64986.2	57042.8	36103	59146.9	63359.9	63985.5	63955	75003	64763.9	59961.6	81102.9	74335.8
1,2,3-Tris(1-ethoxyethoxy)propane		HMDB0037162	5362567	NA	NA	954894	1.221e+06	1.22456e+06	1.01754e+06	474237	887834	780612	698448	1.1793e+06	808538	1.5429e+06	955056	734891	1.23866e+06	1.61551e+06	881384	878981	903594	781750	621242	854302	995793	1.23106e+06	1.38992e+06	656266	937814	1.07456e+06	912365	1.1872e+06	873493	644047	304453	67807.4	0	139053	325271	130674	298684	69428.6	0	105242	43804.4	455419	0
1,2:3,4-Diepoxy-p-menth-8-ene		HMDB0036879	14414154	NA	NA	125608	137869	162940	113897	69438.4	111236	117134	113408	198233	166327	113129	95501.3	111009	147315	107696	60184.6	127233	122066	126081	85493.6	102991	85812.9	142585	174777	76043.9	70660.7	81507.4	79837	108682	119309	97758.3	119131	165126	126387	117883	174560	128250	242214	153779	147094	177844	156160	190980	161819
1,2-Benzisothiazol-3(2H)-one		HMDB0034413	17520	167099	NA	69146	66406.9	71075.9	57347.4	120612	109491	67646.7	71215.3	65545.6	69199.5	60398.8	101186	91194.6	125028	90425	68901.4	76654.4	101708	117663	83763	87673.9	79120.6	108908	138054	90827.4	105211	79648.9	93056.3	68019.5	73495.9	91165.2	83302.7	79162	75346.1	67191.5	50486.5	62832.5	62312.9	53366.9	67520.8	90846.7	76777.5	61056.8	66258.8
1,2-Dihydrodehydroguaiaretic acid		HMDB0036409	131751985	NA	NA	168293	191242	238324	248194	260242	255421	285170	194106	232787	208401	194614	238684	303154	336253	291686	226406	227152	336308	268883	338464	257795	268245	299406	266150	285317	243513	223190	288560	233458	235176	208015	196312	224927	187930	248024	238104	204304	186267	184343	159675	269333	186109	213827	244912
1,2-Dimethoxy-4-vinylbenzene		HMDB0040359	61400	NA	NA	319857	360362	339209	294864	228467	318225	320920	294556	366724	307306	281947	314430	291533	318799	391287	246331	823553	543953	325456	761641	329494	277535	871394	326916	267529	187581	292959	203942	315391	243716	205839	82776.2	110117	97077.6	225574	51406.6	43058.9	110897	113319	57713.3	64605.6	159978	94811.4	64758.7
1,4-beta-D-Glucan	identified	HMDB0006944	53477911	NA	C00760	55874.3	68723.2	43693.7	62725.8	33528.6	32892.6	33613.5	32976.3	66553.9	66411.9	62863.1	39255.5	81764.9	55813.8	66639.1	57591.8	29922.6	76056.2	40469.4	58420.6	51646.9	61645.8	32549.9	46726.8	49494.5	41609.1	51831.6	43807.9	51622.3	58181.1	34150	109653	87755.9	102981	89391.1	98179	101358	86673.4	80599.5	101848	91497.4	94702	77696.9	110032
1,4-Epidioxy-p-mentha-2,8-diene		HMDB0036878	14414153	NA	NA	125608	137869	162940	113897	69438.4	111236	117134	113408	198233	166327	113129	95501.3	111009	147315	107696	60184.6	127233	122066	126081	85493.6	102991	85812.9	142585	174777	76043.9	70660.7	81507.4	79837	108682	119309	97758.3	119131	165126	126387	117883	174560	128250	242214	153779	147094	177844	156160	190980	161819
1,4-Ipomeadiol		HMDB0030471	13186539	NA	NA	302554	354477	262052	268904	170559	246317	335535	450457	348243	448720	255164	319404	201191	346643	259262	99367.5	204557	209415	261791	327670	347784	224269	419617	313412	217329	207293	494079	234294	247121	210951	207623	113756	116390	139035	121823	127864	93240.2	157852	116102	125438	161978	149628	173032	114397
10,13-epoxy-11-methylhexadeca-10,12-dienoic acid		HMDB0094642	86017621	NA	NA	109803	68765.2	152432	103728	96054.6	105065	184247	175878	152240	131321	111445	172128	165379	151450	127642	155512	119241	140214	114824	115476	180514	167263	118973	137815	118296	326696	181050	88933.3	171286	156978	63798.6	68099.2	46489.8	85053.5	80878.2	80988	69600.5	78959.3	64104.3	49585	127516	62877.4	111900	89391.9
10-hendecenoic acid		HMDB0033724	5634	35045	C13910	309034	320740	293821	269294	217104	283689	311343	362226	288594	268578	271059	298196	265667	311945	376786	205478	259773	331045	247427	291458	327829	265874	391031	354682	286991	228648	301005	247328	305922	248143	192236	79297.4	74478.3	86984.4	87988.8	61451.4	63170	86007.9	65822.3	57758.6	138894	79557.3	69502.4	59403.4
10-Oxo-11-octadecen-13-olide		HMDB0029786	9882599	NA	NA	109803	68765.2	152432	103728	96054.6	105065	184247	175878	152240	131321	111445	172128	165379	151450	127642	155512	119241	140214	114824	115476	180514	167263	118973	137815	118296	326696	181050	88933.3	171286	156978	63798.6	68099.2	46489.8	85053.5	80878.2	80988	69600.5	78959.3	64104.3	49585	127516	62877.4	111900	89391.9
12(13)-epoxy-6Z,9Z-octadecadienoic acid		HMDB0062288	16061065	NA	NA	109803	68765.2	152432	103728	96054.6	105065	184247	175878	152240	131321	111445	172128	165379	151450	127642	155512	119241	140214	114824	115476	180514	167263	118973	137815	118296	326696	181050	88933.3	171286	156978	63798.6	68099.2	46489.8	85053.5	80878.2	80988	69600.5	78959.3	64104.3	49585	127516	62877.4	111900	89391.9
12,13-Epoxy-9,15-octadecadienoic acid		HMDB0031088	131751130	NA	NA	109803	68765.2	152432	103728	96054.6	105065	184247	175878	152240	131321	111445	172128	165379	151450	127642	155512	119241	140214	114824	115476	180514	167263	118973	137815	118296	326696	181050	88933.3	171286	156978	63798.6	68099.2	46489.8	85053.5	80878.2	80988	69600.5	78959.3	64104.3	49585	127516	62877.4	111900	89391.9
12-hydroxy lauric acid		HMDB0002059	79034	39567	C08317	93195.1	70059.2	90351.2	55260.4	39805.1	79059.1	72820.3	71983.4	62780.9	62902.1	61566.8	48850	50245.8	71971.6	69329.9	40435.3	46461.5	49150.6	38708.7	64455.2	89879.1	56378.5	68407.7	77648.5	53062.6	70407.2	96938.9	40269.1	82614.2	63918.4	45182.3	43745.3	38151	43683	40658.5	29759.7	44096.8	56325.2	39756.2	28657.5	75603.7	43732.1	42756.5	32214.2
12-Oxo-2,3-dinor-10,15-phytodienoic acid		HMDB0032090	131751254	NA	NA	74018.4	72595.3	103610	62718.7	50626.1	86227	74400.9	65058.8	99355.5	101946	90604.3	71549.8	64630.7	57262.4	93108.5	46989.9	71203.9	50410.1	55515.8	76938.7	93951.9	65290.4	85085.3	81277.2	57690.7	56928.4	67630.7	63461	101575	87471.4	58538.8	44031.4	50344.6	0	30695.2	55156.9	79439.3	52979	50052.2	45160.1	49688.9	0	62765.2	40675
13-HOTE		HMDB0010203	10469728	72641	NA	109803	68765.2	152432	103728	96054.6	105065	184247	175878	152240	131321	111445	172128	165379	151450	127642	155512	119241	140214	114824	115476	180514	167263	118973	137815	118296	326696	181050	88933.3	171286	156978	63798.6	68099.2	46489.8	85053.5	80878.2	80988	69600.5	78959.3	64104.3	49585	127516	62877.4	111900	89391.9
13-Hydroxymarasmene		HMDB0036037	14433050	NA	NA	79405.7	77014.7	64615.2	39276.2	49065.4	71669	52334.1	48857.7	65720.5	61057.7	61368.5	54725.2	46640.6	60385.6	62399.3	32300.1	52296	59950.6	39955.8	50356.4	52315.6	48547.6	48548.1	67934.1	40279.2	36668	51899.8	50269.3	52144.6	43672.2	42031.2	41954.3	45226.5	30687.1	34369.8	24898.6	24785	43373.5	26671.4	27065.9	34819.1	37909.8	39824.1	33989.1
13-OxoODE		HMDB0004668	6446027	902350	C14765	109803	68765.2	152432	103728	96054.6	105065	184247	175878	152240	131321	111445	172128	165379	151450	127642	155512	119241	140214	114824	115476	180514	167263	118973	137815	118296	326696	181050	88933.3	171286	156978	63798.6	68099.2	46489.8	85053.5	80878.2	80988	69600.5	78959.3	64104.3	49585	127516	62877.4	111900	89391.9
13-Oxo-ODE		HMDB0004668	6446027	902350	C14765	109803	68765.2	152432	103728	96054.6	105065	184247	175878	152240	131321	111445	172128	165379	151450	127642	155512	119241	140214	114824	115476	180514	167263	118973	137815	118296	326696	181050	88933.3	171286	156978	63798.6	68099.2	46489.8	85053.5	80878.2	80988	69600.5	78959.3	64104.3	49585	127516	62877.4	111900	89391.9
13S-HOTrE		HMDB10203	16061072	84441	C16316	109803	68765.2	152432	103728	96054.6	105065	184247	175878	152240	131321	111445	172128	165379	151450	127642	155512	119241	140214	114824	115476	180514	167263	118973	137815	118296	326696	181050	88933.3	171286	156978	63798.6	68099.2	46489.8	85053.5	80878.2	80988	69600.5	78959.3	64104.3	49585	127516	62877.4	111900	89391.9
15(16)-EpODE		HMDB0010206	16061062	88460	NA	109803	68765.2	152432	103728	96054.6	105065	184247	175878	152240	131321	111445	172128	165379	151450	127642	155512	119241	140214	114824	115476	180514	167263	118973	137815	118296	326696	181050	88933.3	171286	156978	63798.6	68099.2	46489.8	85053.5	80878.2	80988	69600.5	78959.3	64104.3	49585	127516	62877.4	111900	89391.9
15,16-Epoxy-9,12-octadecadienoic acid		HMDB0030950	131751107	NA	NA	109803	68765.2	152432	103728	96054.6	105065	184247	175878	152240	131321	111445	172128	165379	151450	127642	155512	119241	140214	114824	115476	180514	167263	118973	137815	118296	326696	181050	88933.3	171286	156978	63798.6	68099.2	46489.8	85053.5	80878.2	80988	69600.5	78959.3	64104.3	49585	127516	62877.4	111900	89391.9
17beta-hydroxy-5beta-estran-3-one		HMDB0062677	21634212	87333	NA	68029.5	56685.5	83613	62422.6	54161.3	77995.1	71818.2	67650.1	61443.4	54447.4	63161	79604.1	78711.9	67863.5	72375.7	59657.3	69928.1	75208.9	58670.3	96465.3	70390.8	89965.6	108794	102279	40698.4	115174	82173.8	50248.8	69725.4	74771.1	57119.8	43977.6	53785.6	80043.4	32389.3	50028.1	40109.9	61678.4	42807.7	35329.6	84726.8	39409.2	71865.1	45519.9
17-Hydroxylinolenic acid		HMDB0011108	10708957	NA	C16346	109803	68765.2	152432	103728	96054.6	105065	184247	175878	152240	131321	111445	172128	165379	151450	127642	155512	119241	140214	114824	115476	180514	167263	118973	137815	118296	326696	181050	88933.3	171286	156978	63798.6	68099.2	46489.8	85053.5	80878.2	80988	69600.5	78959.3	64104.3	49585	127516	62877.4	111900	89391.9
17-hydroxy-linolenic acid		HMDB11108	44256502	NA	NA	109803	68765.2	152432	103728	96054.6	105065	184247	175878	152240	131321	111445	172128	165379	151450	127642	155512	119241	140214	114824	115476	180514	167263	118973	137815	118296	326696	181050	88933.3	171286	156978	63798.6	68099.2	46489.8	85053.5	80878.2	80988	69600.5	78959.3	64104.3	49585	127516	62877.4	111900	89391.9
19-Nor-5-androstenediol		HMDB0004590	9900246	529214	NA	68029.5	56685.5	83613	62422.6	54161.3	77995.1	71818.2	67650.1	61443.4	54447.4	63161	79604.1	78711.9	67863.5	72375.7	59657.3	69928.1	75208.9	58670.3	96465.3	70390.8	89965.6	108794	102279	40698.4	115174	82173.8	50248.8	69725.4	74771.1	57119.8	43977.6	53785.6	80043.4	32389.3	50028.1	40109.9	61678.4	42807.7	35329.6	84726.8	39409.2	71865.1	45519.9
19-Norandrosterone		HMDB0002697	128251	36412	NA	68029.5	56685.5	83613	62422.6	54161.3	77995.1	71818.2	67650.1	61443.4	54447.4	63161	79604.1	78711.9	67863.5	72375.7	59657.3	69928.1	75208.9	58670.3	96465.3	70390.8	89965.6	108794	102279	40698.4	115174	82173.8	50248.8	69725.4	74771.1	57119.8	43977.6	53785.6	80043.4	32389.3	50028.1	40109.9	61678.4	42807.7	35329.6	84726.8	39409.2	71865.1	45519.9
19-Noretiocholanolone		HMDB0005886	9548753	36412	NA	68029.5	56685.5	83613	62422.6	54161.3	77995.1	71818.2	67650.1	61443.4	54447.4	63161	79604.1	78711.9	67863.5	72375.7	59657.3	69928.1	75208.9	58670.3	96465.3	70390.8	89965.6	108794	102279	40698.4	115174	82173.8	50248.8	69725.4	74771.1	57119.8	43977.6	53785.6	80043.4	32389.3	50028.1	40109.9	61678.4	42807.7	35329.6	84726.8	39409.2	71865.1	45519.9
1-Acetylcyclohexyl acetate		HMDB0039710	62017	NA	NA	236569	258926	223046	204406	154475	230403	176635	169780	248465	204944	211817	186274	177115	219882	274925	109146	167775	176891	192287	180292	244220	175497	237336	260406	152139	122323	227688	165882	199742	166611	158105	112952	120662	131974	123097	110402	111195	158183	134849	119099	254653	150769	147078	103907
1-Benzyloxy-1-(2-methoxyethoxy)ethane		HMDB0037135	22235151	NA	NA	129910	200657	136149	143441	110841	106274	124970	122974	172603	139528	177380	116521	141232	166104	150430	114007	126911	121054	112873	147478	135178	104421	127424	161358	133453	116070	120216	132449	130616	158179	106165	86615.2	128697	53984.3	137265	135435	108067	154684	92932.5	66043.6	87558.5	98998.5	163012	58335.4
1-Cyclopropyl-4-methyl-1,3-cyclohexanediol		HMDB0036992	73815131	NA	NA	403094	487353	495635	440662	329030	444513	463203	477301	503970	457144	413035	485976	370373	462660	608536	244537	382065	482415	408085	507728	526754	430094	599832	514565	407043	323168	416666	333202	431254	339426	338844	164164	125509	173980	161805	126286	154237	207961	131391	130946	231210	181746	183962	171513
1-Hexen-3-ol		HMDB0031503	20928	NA	NA	68246.8	83025.3	90228.6	82355.9	60371	52449.1	65304.2	57858.9	73487.2	61006.2	63588.6	72858.2	68669.2	66007.4	80947.1	43598.9	51475	60406.7	59755.3	74676.6	64620.4	56799.2	82646.3	83299.2	57985.2	33929.2	55306.2	56844.3	73361	64224.9	68825.9	47325.6	47134.3	59048.8	58439	46417.4	50584.9	58185.1	45011.6	42323.3	47624.8	60008.5	61950.2	49526.8
1H-Pyrrole-2-carboxaldehyde		HMDB0036057	13854	59978	NA	262161	255156	250638	269405	215844	271785	270564	202922	236821	317497	239239	271855	289303	215264	247199	217090	238269	301968	209316	285869	251203	221560	228193	237011	207291	226169	223329	205188	227842	221008	205888	317819	352672	306103	389072	307813	309376	316673	340215	320050	415610	294412	407975	297922
1-Hydroxy-2-butanone		HMDB0031507	521300	88390	NA	1.81681e+06	3.93966e+06	3.59409e+06	2.58079e+06	5230106	3.68656e+06	3.15884e+06	8167922	4.58022e+06	1954573	2.92624e+06	4.00314e+06	3389748	3132904	2582963	9731120	10018303	5151012	6330369	3845188	2.88542e+06	4.81403e+06	6.51737e+06	4.97457e+06	3.19513e+06	1.70177e+06	1.55845e+06	1.46756e+06	3.25844e+06	3548256	4.26544e+06	2.62526e+06	1.84804e+06	2.4178e+06	4.01632e+06	1.97717e+06	1.1697e+06	2.51153e+06	2.17896e+06	2.37436e+06	2.21259e+06	4.11471e+06	3.60204e+06	1.77517e+06
1-Hydroxy-3,5-dimethoxy-2-prenylxanthone		HMDB0041251	14777482	NA	NA	34603.2	21859.4	32142.9	30793.5	29032.4	30646.3	32753.5	28928.7	26253.6	29156.7	33137.4	30177.1	34340.1	30020	37457.9	37909.2	35543	37206.3	42986.1	62836.8	45690.9	33397.3	46512.1	44434.3	38034.6	40741.5	32746.2	29033.5	37974.5	21926.9	27766.9	42830.6	38999.8	28534.6	22753.4	24995.9	23249.5	32167.5	38518.3	38379	42153.3	30342.7	29325	37245.7
1-Hydroxy-3-nonanone		HMDB0037143	5362570	NA	NA	31059080	36333212	35153816	31346394	26063910	34265028	37671056	37614436	32756472	31222842	25990618	35452616	24216608	31566360	49759612	18183924	29314668	36772668	29634554	34388456	37593128	31483394	42794468	35495564	31823804	20526698	28560828	22274504	30226706	26423828	20904814	21439336	16472399	28092744	17140688	14065325	19779730	23878034	20280954	17347108	17172318	22708688	19138784	27444522
1-Hydroxy-3-octanone		HMDB0031290	13864714	NA	NA	4954824	5.14197e+06	4.41919e+06	4.82049e+06	5765679	5892011	5.07004e+06	5464260	4797286	3.64796e+06	4.84736e+06	6130662	5.12007e+06	6475661	5.90411e+06	3081296	7.21951e+06	9157299	6169049	7.69341e+06	5.73703e+06	7005724	9996086	5.16342e+06	4.68692e+06	1.93052e+06	3824784	3377617	6.38554e+06	4767635	4082351	9323195	7.81657e+06	11156823	10348903	7223643	7.55598e+06	8117199	11308355	7875526	7821792	9446027	7832668	10037557
1-Hydroxyacorenone		HMDB0030917	131751097	NA	NA	79405.7	77014.7	64615.2	39276.2	49065.4	71669	52334.1	48857.7	65720.5	61057.7	61368.5	54725.2	46640.6	60385.6	62399.3	32300.1	52296	59950.6	39955.8	50356.4	52315.6	48547.6	48548.1	67934.1	40279.2	36668	51899.8	50269.3	52144.6	43672.2	42031.2	41954.3	45226.5	30687.1	34369.8	24898.6	24785	43373.5	26671.4	27065.9	34819.1	37909.8	39824.1	33989.1
1-Methyl-2-oxopropyl butyrate		HMDB0036230	529253	NA	NA	725537	909899	730622	661799	538843	590477	709836	769860	872325	735692	576060	751613	629733	809478	873124	356186	678111	785050	609766	585886	755381	538295	714600	879770	470162	443530	632329	476894	687153	645897	543934	629235	455056	444668	450805	589883	435334	799372	417877	411818	597636	414990	858311	421107
1-Methyl-2-pyrrolecarboxaldehyde		HMDB0040582	14504	NA	NA	137024	181917	148481	141960	210147	146211	142312	142233	131669	168935	137892	167933	159226	162502	149453	156901	172888	197995	209576	119640	122754	189671	134492	165691	130888	134714	109557	98458.5	159926	149268	184910	251744	237183	269401	212994	174106	264058	235835	226974	291733	275880	237253	239739	257599
1-Methylbutyl butanoate		HMDB0039219	43263	NA	NA	31059080	36333212	35153816	31346394	26063910	34265028	37671056	37614436	32756472	31222842	25990618	35452616	24216608	31566360	49759612	18183924	29314668	36772668	29634554	34388456	37593128	31483394	42794468	35495564	31823804	20526698	28560828	22274504	30226706	26423828	20904814	21439336	16472399	28092744	17140688	14065325	19779730	23878034	20280954	17347108	17172318	22708688	19138784	27444522
1-Octanal		HMDB0001140	454	17935	C01545	78455.7	65344.3	83608.7	64943.9	79512.6	59021.4	76686.4	92972.8	74609.5	87474	75396.3	67367.8	63850.3	54698.8	79092.8	38729	47039.2	65392.8	44689	66409.2	63031.6	53986.8	98142.6	87254.1	62420.1	47849	83815.5	49708.2	78847.6	48770.1	41515	62052.1	49549.7	69056.4	60690.3	35418	50869.3	53883.8	58666.7	42025.4	53045.4	79185.9	69060.6	54148.4
1-Octen-3-one		HMDB0031309	61346	88900	NA	69843.6	78615.2	63940	66103.5	62192.9	55711	65202.7	80624	91736.6	102287	50228.8	65130.9	58881.1	62038.8	69958.4	29119.2	39570	55943.8	39152.8	67235.7	53858	44080.1	80048	64278.9	39105.8	43593.3	87947.1	53212.1	54701.4	51159.3	48326.9	56044.6	31629.5	61795.2	44705.4	41984	42903.3	57068.2	53858.8	30655.1	31250.8	62713.1	64284.5	50033.9
1-Octen-3-yl acetate		HMDB0032452	17121	NA	NA	403094	487353	495635	440662	329030	444513	463203	477301	503970	457144	413035	485976	370373	462660	608536	244537	382065	482415	408085	507728	526754	430094	599832	514565	407043	323168	416666	333202	431254	339426	338844	164164	125509	173980	161805	126286	154237	207961	131391	130946	231210	181746	183962	171513
1-Penten-3-one		HMDB0031607	15394	89945	NA	75519.4	80879.1	67980.6	87867.8	61007.5	61489.5	61430	56223.3	56604.2	78104.3	68954.1	84552.6	59839.8	86573.8	71819.4	65029.5	58213.9	54010.2	68718.4	39045.8	79992.7	58417.2	128319	51115	76859.9	69534.4	84998.8	61067.6	71433.4	76576.7	70756.6	80120.5	64817.1	60440.7	51578.2	55921.9	74286.1	89296.9	38499.3	46812.9	45178.3	56000.1	72622	54148.8
1-Phenylethyl acetate		HMDB0032620	62341	NA	NA	319857	360362	339209	294864	228467	318225	320920	294556	366724	307306	281947	314430	291533	318799	391287	246331	823553	543953	325456	761641	329494	277535	871394	326916	267529	187581	292959	203942	315391	243716	205839	82776.2	110117	97077.6	225574	51406.6	43058.9	110897	113319	57713.3	64605.6	159978	94811.4	64758.7
1-Pyrroline-4-hydroxy-2-carboxylate		HMDB0002234	440282	16352	C04282	2.70472e+06	2.59688e+06	2963935	2.94483e+06	2.69327e+06	3.41179e+06	3.54092e+06	3.54544e+06	2.92903e+06	2.81881e+06	3.29909e+06	2750800	3.44404e+06	2.90506e+06	3229938	3.60681e+06	3968073	4.00734e+06	4216474	5.67088e+06	4.77157e+06	3611308	4.6253e+06	4.73089e+06	4800854	4568997	3.15983e+06	3.1172e+06	3.60034e+06	2.51572e+06	2.77714e+06	4.18697e+06	3582345	2.55328e+06	2315090	2933072	2.84001e+06	2.70779e+06	3499983	4.15245e+06	4940586	2.33787e+06	2.76964e+06	3.48574e+06
2-(1-Propenyl)-delta1-piperideine		HMDB0033365	56972723	NA	NA	34759.7	32554.6	49364.9	40443.5	31162.7	41155.5	50953.1	53321.3	55838	54257	57509.6	46089.1	43852.5	51130.6	55581.4	44702.8	57065.3	44891.5	42515.2	48082.2	35254.4	41188.3	63662.9	73547.6	38290.7	40431.3	54178.8	59583.1	67973.4	49808.9	54163.7	28859.2	28295.1	18879.1	23221.2	30390.2	32870.7	21680.9	17212.2	24548.8	28437.7	28019.9	36493.8	14722.7
2-(4-methoxyphenyl)propan-2-ol		HMDB0062603	81930	84225	NA	125608	137869	162940	113897	69438.4	111236	117134	113408	198233	166327	113129	95501.3	111009	147315	107696	60184.6	127233	122066	126081	85493.6	102991	85812.9	142585	174777	76043.9	70660.7	81507.4	79837	108682	119309	97758.3	119131	165126	126387	117883	174560	128250	242214	153779	147094	177844	156160	190980	161819
2-(Ethoxymethyl)furan		HMDB0040445	80455	NA	NA	44527.8	38993	49939.9	33315.1	36861	39517.2	29847.9	28948.7	34893.1	51301.7	36034.5	31718.3	32598.4	41186	37746.6	26228.5	30983.7	34968.3	28658.7	34442.3	38471.1	31565.1	37294	39566.7	44184.7	29332.1	37357.3	31230.4	31835.1	30813.1	29212.8	46181.9	49299.9	35719.4	54526.2	68550.1	49160.3	56809.8	51342.4	56083.4	55079.3	65128.9	51810.2	46301.8
2-(Methylthio)ethanol		HMDB0032425	78925	63861	NA	430853	555001	426838	516626	462962	380637	406072	453190	465662	541114	421327	489476	464922	491044	380802	403407	479595	609771	514575	365327	570494	453944	472089	534562	422684	482885	329822	364406	378305	453572	424328	499526	392630	401788	450877	406056	340083	452284	448935	376945	485059	389352	383595	486749
2,2,4,4,-Tetramethyl-6-(1-oxopropyl)-1,3,5-cyclohexanetrione		HMDB0033191	100958560	NA	NA	106897	131868	94182.7	93200.2	79294.4	84049.4	85072	88079.5	136130	100280	100662	165391	96240.7	104615	99710.7	72071.4	108743	96826.8	75823.8	73681.8	87992.8	97552.6	124133	112614	86615	72053	108824	86609.7	111233	89758.6	107850	55587.6	64986.2	57042.8	36103	59146.9	63359.9	63985.5	63955	75003	64763.9	59961.6	81102.9	74335.8
2,2,4-Trimethyl-1,3-dioxolane		HMDB0037266	62384	NA	NA	2.28202e+06	2.44802e+06	2.67102e+06	2.37729e+06	1.93155e+06	2.6323e+06	2.47014e+06	2.29271e+06	2.73045e+06	2.28869e+06	1.81642e+06	2.91286e+06	2123246	2.36444e+06	3.60295e+06	1.21265e+06	2.30287e+06	2725161	2.07744e+06	2.60667e+06	2.36361e+06	2.30766e+06	2.52162e+06	2.78959e+06	2.28737e+06	1.12185e+06	2.00102e+06	1.85176e+06	2.33975e+06	2.17494e+06	1.74504e+06	5.44662e+06	5.28788e+06	8102586	5.45059e+06	5136677	5261508	5.85648e+06	7194426	4609864	5.51374e+06	5.88861e+06	7103756	7120424
2,2,7,7-Tetramethyl-1,6-dioxaspiro[4.4]non-3-ene		HMDB0030006	10899299	NA	NA	62901	81140.9	63751.9	53882.4	39100.1	62278.2	74057.7	60978.1	56959.7	74157.6	67350.2	47522.9	57724.4	60781.4	106842	41259.9	61908	51837.9	39395.9	60619.9	48616.9	50778.8	65848.1	62783.6	39505.9	48705.6	49136.2	63438.6	65372.2	52545.7	48950.1	67099.3	101052	70110.2	69982.7	71691.4	87464.8	90415	71403.1	64993.5	88957	49645.8	96000.2	69621.5
2,2-Dimethyloxirane		HMDB0034431	11208	NA	NA	48236.3	29350.7	33855.1	46118.4	32337.8	28957.8	41997.4	32439.3	37516.7	32582.6	32693	32609.9	43637.7	43428.7	49069.4	35845.1	36444.6	38893.8	29925.8	32008.9	25933.7	43836.3	36810.5	42137.4	28203.8	38745.5	50197.3	31346.9	41080.5	40564.2	41881.7	51791.2	56221.1	64225.4	64085.8	70667.8	52907.6	53664.1	45199.5	55208.6	67477.5	67772.4	53169.3	77638
2,3,5-Trimethylfuran		HMDB0029721	517859	NA	NA	97984.1	124415	119364	98293.8	113318	108631	113201	89487.2	121505	90633.1	109946	81038.3	92123.7	137093	112446	67344.8	102485	124800	124744	93317.6	99796	97648.3	110335	168241	76394.9	71351.9	83395.9	90177.3	93822.7	98361.7	139903	110328	89751.9	45925.4	52817.1	123299	76061.2	70716.6	84523.9	72564	103595	58479.4	68695.9	51274.6
2,3-Diaminosalicylic acid		HMDB0013159	53481699	88769	NA	57474.3	43336.4	46456.9	14407.2	121680	100307	117639	105146	18690.7	19559.3	15666.8	47396.2	132425	79686.6	107293	101281	60007.5	99675.1	56198.9	45173.6	41842.3	29687.3	28179.5	52079.6	103525	286740	113883	78363.7	58127.2	92568.9	91914.8	88008.9	27448	24948.8	25442	18033.4	30416.6	20244.5	21554.5	38123.2	49532.4	19151.5	19830.4	13281.2
2,3-Dihydro-4-methylfuran		HMDB0040584	36744	51678	NA	75519.4	80879.1	67980.6	87867.8	61007.5	61489.5	61430	56223.3	56604.2	78104.3	68954.1	84552.6	59839.8	86573.8	71819.4	65029.5	58213.9	54010.2	68718.4	39045.8	79992.7	58417.2	128319	51115	76859.9	69534.4	84998.8	61067.6	71433.4	76576.7	70756.6	80120.5	64817.1	60440.7	51578.2	55921.9	74286.1	89296.9	38499.3	46812.9	45178.3	56000.1	72622	54148.8
2,3-Methylene suberic acid		HMDB0059779	124202116	89869	NA	26771.8	26920.9	36438.9	27563.2	24175.7	26688.8	24814.6	19594.8	40371.3	37100.1	39233.9	39637.4	29362.7	31115.6	38607.5	16412.3	25980.1	26939.5	32274.7	22367.6	28163.7	35621.6	23877.7	38096.1	19653.9	26501.9	29459.1	21171.9	44009.7	33353.9	20259	25953.2	57428.5	33063.5	35804	39932.4	30209.2	74966.6	29082.6	22442.6	32136	55650.3	64242.3	46928
2,3-Octanedione		HMDB0031293	11449	NA	NA	83695.1	81917.4	77648.2	93430.8	73293.4	78218.4	68261.6	59883.3	90296.4	81380.4	70828.3	77336.6	97751.7	61165.1	67996.6	57721.5	53827.8	67794.3	54063.9	75450.4	74457.6	60976.8	80425.2	78154.1	69819.7	69619.7	68942.2	62732.9	85502.3	69160.2	69030.1	82340.9	77460.4	97448.3	74460.6	78421.1	63975.1	80083.7	69837.5	63781.6	79658	96205.2	84787.9	84959.9
2,3-Undecanedione		HMDB0031843	61404	NA	NA	309034	320740	293821	269294	217104	283689	311343	362226	288594	268578	271059	298196	265667	311945	376786	205478	259773	331045	247427	291458	327829	265874	391031	354682	286991	228648	301005	247328	305922	248143	192236	79297.4	74478.3	86984.4	87988.8	61451.4	63170	86007.9	65822.3	57758.6	138894	79557.3	69502.4	59403.4
2,4,4-Trimethylcyclopentanone		HMDB0031197	107324	NA	NA	69843.6	78615.2	63940	66103.5	62192.9	55711	65202.7	80624	91736.6	102287	50228.8	65130.9	58881.1	62038.8	69958.4	29119.2	39570	55943.8	39152.8	67235.7	53858	44080.1	80048	64278.9	39105.8	43593.3	87947.1	53212.1	54701.4	51159.3	48326.9	56044.6	31629.5	61795.2	44705.4	41984	42903.3	57068.2	53858.8	30655.1	31250.8	62713.1	64284.5	50033.9
2,4,5-Trimethyl-1,3-dioxolane		HMDB0040279	102967	87572	NA	2.28202e+06	2.44802e+06	2.67102e+06	2.37729e+06	1.93155e+06	2.6323e+06	2.47014e+06	2.29271e+06	2.73045e+06	2.28869e+06	1.81642e+06	2.91286e+06	2123246	2.36444e+06	3.60295e+06	1.21265e+06	2.30287e+06	2725161	2.07744e+06	2.60667e+06	2.36361e+06	2.30766e+06	2.52162e+06	2.78959e+06	2.28737e+06	1.12185e+06	2.00102e+06	1.85176e+06	2.33975e+06	2.17494e+06	1.74504e+06	5.44662e+06	5.28788e+06	8102586	5.45059e+06	5136677	5261508	5.85648e+06	7194426	4609864	5.51374e+06	5.88861e+06	7103756	7120424
2,4,6-Triethyl-1,3,5-trioxane		HMDB0034040	95669	NA	NA	317457	326928	452709	420750	251062	472990	521741	658687	448325	469912	846900	307184	314012	498822	710306	315444	318201	335681	178535	289440	240503	477156	524656	595351	259260	512353	490112	363348	638579	397908	218243	332447	254997	310566	262820	226370	283915	423322	259964	261569	286159	332676	297419	354184
2,4,7-Decatrienoic acid		HMDB0035235	18916326	NA	NA	125608	137869	162940	113897	69438.4	111236	117134	113408	198233	166327	113129	95501.3	111009	147315	107696	60184.6	127233	122066	126081	85493.6	102991	85812.9	142585	174777	76043.9	70660.7	81507.4	79837	108682	119309	97758.3	119131	165126	126387	117883	174560	128250	242214	153779	147094	177844	156160	190980	161819
2,4-Diethyl-5-propyloxazole		HMDB0037883	86003227	NA	NA	22173.6	28588.2	36088.1	41721.1	26083	28621.8	35929.6	26325.3	44398.4	28047.7	57709	21199.7	32568.1	47395.6	47178.1	37037.6	39350.5	31557.2	43501.5	30107	29905.2	31201.5	40489.9	59699.5	27541.5	36362.4	20835.3	36348.1	36513.3	41101.9	62423.3	26936.2	28482.5	38131.6	18079.7	19509.9	22518	19080.5	29764.5	22112.7	20566.2	23980.3	32286.2	18213.7
2,4-Dimethylpimelic acid		HMDB0059760	543862	89874	NA	294161	292649	362573	312789	276612	353848	272464	259481	393119	293483	319734	351261	262288	349839	349010	166447	311050	322700	255503	271450	308555	225864	365407	437670	201540	246329	290636	247008	347563	270861	236362	197998	171490	187606	135506	174254	170424	241181	161755	196161	279967	248208	281390	219395
2,5-Diethyltetrahydrofuran		HMDB0029574	62913	NA	NA	78455.7	65344.3	83608.7	64943.9	79512.6	59021.4	76686.4	92972.8	74609.5	87474	75396.3	67367.8	63850.3	54698.8	79092.8	38729	47039.2	65392.8	44689	66409.2	63031.6	53986.8	98142.6	87254.1	62420.1	47849	83815.5	49708.2	78847.6	48770.1	41515	62052.1	49549.7	69056.4	60690.3	35418	50869.3	53883.8	58666.7	42025.4	53045.4	79185.9	69060.6	54148.4
2,5-Dimethyl-4-ethoxy-3(2H)-furanone		HMDB0032232	3017596	NA	NA	90713.6	85550.6	96104.9	96498.1	74596.7	78442.8	75442.9	104027	107031	86219	65845.1	61371.6	93567.2	88334.1	75885.8	49881	85430.3	93453	56853.1	71591.5	83795.8	64176.5	100802	82837.3	64735.7	49117.2	74463.1	62620.1	91867.1	61130.1	62737.9	64536.4	53851.2	80269.2	59658.9	62449.7	55737.9	70239.4	54827.8	56466.8	60658.1	83705	73238.7	71776.7
2,5-Octadien-1-ol		HMDB0040146	92468132	NA	NA	69843.6	78615.2	63940	66103.5	62192.9	55711	65202.7	80624	91736.6	102287	50228.8	65130.9	58881.1	62038.8	69958.4	29119.2	39570	55943.8	39152.8	67235.7	53858	44080.1	80048	64278.9	39105.8	43593.3	87947.1	53212.1	54701.4	51159.3	48326.9	56044.6	31629.5	61795.2	44705.4	41984	42903.3	57068.2	53858.8	30655.1	31250.8	62713.1	64284.5	50033.9
2,6-Dihydroxypseudooxynicotine		METPA1233	NA	28220	C15986	72514.2	70168	66510.8	54339.8	75734	51972.1	36187.1	49545.2	83478.8	64603.5	66491.6	57480.5	64318.9	42272.2	53696.2	56797.6	75178.5	68642.5	58511.3	43345.5	68413.1	65088.6	54733.5	71637.4	53733.2	32960.8	41728	58077.7	66976.4	41466.7	52974	41110.2	45235.1	51364.1	48751.1	52080.2	35432	42462.7	46166.6	41849.9	66516.1	50217.8	47882.2	47795
2,6-Dimethyl-3,7-octadiene-2,6-diol		HMDB0036990	5352451	NA	NA	403094	487353	495635	440662	329030	444513	463203	477301	503970	457144	413035	485976	370373	462660	608536	244537	382065	482415	408085	507728	526754	430094	599832	514565	407043	323168	416666	333202	431254	339426	338844	164164	125509	173980	161805	126286	154237	207961	131391	130946	231210	181746	183962	171513
2,6-Dimethyl-7-octene-2,6-diol		HMDB0041216	120154	NA	NA	9949007	11504798	11419062	9327990	7611035	10557322	12258934	11924596	11121203	10087879	8976714	11839756	8963184	10683619	14898223	6.08635e+06	9378611	12510601	10533930	10980307	12879971	9452784	13969028	11505806	9738459	7.43292e+06	9378756	7251482	9339049	8226159	6.97687e+06	2.77864e+06	3.51156e+06	5.40678e+06	3.36879e+06	2.54327e+06	3.71239e+06	5.53706e+06	3.01635e+06	2.83467e+06	3.79552e+06	4814188	3.59266e+06	5.48434e+06
2-Acetylpyrrole		HMDB0035882	14079	59981	NA	137024	181917	148481	141960	210147	146211	142312	142233	131669	168935	137892	167933	159226	162502	149453	156901	172888	197995	209576	119640	122754	189671	134492	165691	130888	134714	109557	98458.5	159926	149268	184910	251744	237183	269401	212994	174106	264058	235835	226974	291733	275880	237253	239739	257599
2-Aminophenol		METPA0236	NA	18112	C01987	137024	181917	148481	141960	210147	146211	142312	142233	131669	168935	137892	167933	159226	162502	149453	156901	172888	197995	209576	119640	122754	189671	134492	165691	130888	134714	109557	98458.5	159926	149268	184910	251744	237183	269401	212994	174106	264058	235835	226974	291733	275880	237253	239739	257599
2-Buten-1-ol		HMDB0033858	643789	NA	NA	48236.3	29350.7	33855.1	46118.4	32337.8	28957.8	41997.4	32439.3	37516.7	32582.6	32693	32609.9	43637.7	43428.7	49069.4	35845.1	36444.6	38893.8	29925.8	32008.9	25933.7	43836.3	36810.5	42137.4	28203.8	38745.5	50197.3	31346.9	41080.5	40564.2	41881.7	51791.2	56221.1	64225.4	64085.8	70667.8	52907.6	53664.1	45199.5	55208.6	67477.5	67772.4	53169.3	77638
2-Butyl-4,5-diethyloxazole		HMDB0037891	525778	NA	NA	55691.6	50090.5	59847.1	56345.2	32780.5	42912.7	71514.6	63176.4	57799.3	35530.9	118111	57174.5	38775	45702.3	108898	57400.1	53446.2	39112	60662.1	28769.4	34440.9	51182.5	122514	76868.9	35260.8	32087.9	36011.5	60429.4	85942.1	57421	26340.4	37942.1	27758.1	29898.3	32087.2	27690.3	38878.2	41120.3	30023.6	35142.8	46570.8	31356.8	46030.3	28148.6
2-Butyl-4-ethyl-5-methyloxazole		HMDB0037886	580707	NA	NA	22173.6	28588.2	36088.1	41721.1	26083	28621.8	35929.6	26325.3	44398.4	28047.7	57709	21199.7	32568.1	47395.6	47178.1	37037.6	39350.5	31557.2	43501.5	30107	29905.2	31201.5	40489.9	59699.5	27541.5	36362.4	20835.3	36348.1	36513.3	41101.9	62423.3	26936.2	28482.5	38131.6	18079.7	19509.9	22518	19080.5	29764.5	22112.7	20566.2	23980.3	32286.2	18213.7
2-Butyl-5-ethyl-4-methyloxazole		HMDB0037884	580388	NA	NA	22173.6	28588.2	36088.1	41721.1	26083	28621.8	35929.6	26325.3	44398.4	28047.7	57709	21199.7	32568.1	47395.6	47178.1	37037.6	39350.5	31557.2	43501.5	30107	29905.2	31201.5	40489.9	59699.5	27541.5	36362.4	20835.3	36348.1	36513.3	41101.9	62423.3	26936.2	28482.5	38131.6	18079.7	19509.9	22518	19080.5	29764.5	22112.7	20566.2	23980.3	32286.2	18213.7
2-Butyl-5-methyl-4-propyloxazole		HMDB0037894	525779	NA	NA	55691.6	50090.5	59847.1	56345.2	32780.5	42912.7	71514.6	63176.4	57799.3	35530.9	118111	57174.5	38775	45702.3	108898	57400.1	53446.2	39112	60662.1	28769.4	34440.9	51182.5	122514	76868.9	35260.8	32087.9	36011.5	60429.4	85942.1	57421	26340.4	37942.1	27758.1	29898.3	32087.2	27690.3	38878.2	41120.3	30023.6	35142.8	46570.8	31356.8	46030.3	28148.6
2-Carboxy-4-dodecanolide		HMDB0030987	85931447	NA	NA	52517.3	46409.8	37050.9	37809.2	35787	35769.9	40111.4	33464.5	53066.4	45906.7	43847.5	37856.4	38225.2	37606.8	42922.2	26722.2	32825.7	46026.3	25774.5	33734.2	31340	35377.9	48868.9	59243.7	28872.7	33640.5	33846.3	27317.9	42341.6	52820.3	27772	31524.8	29703.6	20414.5	19789.3	24898.2	28462.8	38611.5	24562.9	21288.6	22145.1	27306.4	36625.4	18940.6
2-Carboxy-5,7-dimethyl-4-octanolide		HMDB0030986	131751113	NA	NA	60719.4	38525.9	53797.3	48507.5	50330.1	50617.5	63403.1	47744.4	54002.6	47361.8	48124.3	47101.7	37147.1	43107.2	55953.4	32863.9	33222.7	53820	36715.6	52124.4	50090.9	56088.4	68338.5	57104.9	43013.9	29355.5	56470	39191.8	39084.1	42446.8	43942.7	35391.1	26902.8	33376.4	38208.5	44323	28739.6	53318.6	33775.3	26542.4	33828.2	39253	49728.5	24020.6
2E,4Z-Heptadienal		HMDB0061891	11788274	NA	NA	97984.1	124415	119364	98293.8	113318	108631	113201	89487.2	121505	90633.1	109946	81038.3	92123.7	137093	112446	67344.8	102485	124800	124744	93317.6	99796	97648.3	110335	168241	76394.9	71351.9	83395.9	90177.3	93822.7	98361.7	139903	110328	89751.9	45925.4	52817.1	123299	76061.2	70716.6	84523.9	72564	103595	58479.4	68695.9	51274.6
2-Ethoxy-4-(methoxymethyl)phenol		HMDB0038354	6453284	NA	NA	115416	144676	117828	104242	72557.4	95585.6	98858.4	106646	173135	127044	115271	98442.7	116451	123768	114062	95435.7	103775	105280	104626	92420.2	115607	107699	125763	130080	103867	97847.6	106182	104907	128308	110472	101730	139555	249063	102972	151890	196520	177543	188691	128255	167549	180954	140185	129642	146301
2-Ethyl-2-hexenal		HMDB0061945	5354264	88838	NA	69843.6	78615.2	63940	66103.5	62192.9	55711	65202.7	80624	91736.6	102287	50228.8	65130.9	58881.1	62038.8	69958.4	29119.2	39570	55943.8	39152.8	67235.7	53858	44080.1	80048	64278.9	39105.8	43593.3	87947.1	53212.1	54701.4	51159.3	48326.9	56044.6	31629.5	61795.2	44705.4	41984	42903.3	57068.2	53858.8	30655.1	31250.8	62713.1	64284.5	50033.9
2-Ethyl-4-methyloxazole		HMDB0037837	528405	NA	NA	115103	130366	97723	97635.9	111172	126286	62059.4	79497.4	121732	105891	106295	112470	103019	114550	82833.3	94169.4	121909	87640.8	75014.7	102994	84054.2	106682	83274.2	111011	96818.4	90942.4	81423.1	89552.9	120609	106551	126897	148684	117718	141509	149991	131721	159041	190374	166110	148949	166086	171075	197129	148022
2-Ethyl-5-methylfuran		HMDB0029728	74346	NA	NA	97984.1	124415	119364	98293.8	113318	108631	113201	89487.2	121505	90633.1	109946	81038.3	92123.7	137093	112446	67344.8	102485	124800	124744	93317.6	99796	97648.3	110335	168241	76394.9	71351.9	83395.9	90177.3	93822.7	98361.7	139903	110328	89751.9	45925.4	52817.1	123299	76061.2	70716.6	84523.9	72564	103595	58479.4	68695.9	51274.6
2-Ethyl-5-methyloxazole		HMDB0037858	528403	NA	NA	115103	130366	97723	97635.9	111172	126286	62059.4	79497.4	121732	105891	106295	112470	103019	114550	82833.3	94169.4	121909	87640.8	75014.7	102994	84054.2	106682	83274.2	111011	96818.4	90942.4	81423.1	89552.9	120609	106551	126897	148684	117718	141509	149991	131721	159041	190374	166110	148949	166086	171075	197129	148022
2-Ethylbutanal		HMDB0031220	7359	121474	NA	68246.8	83025.3	90228.6	82355.9	60371	52449.1	65304.2	57858.9	73487.2	61006.2	63588.6	72858.2	68669.2	66007.4	80947.1	43598.9	51475	60406.7	59755.3	74676.6	64620.4	56799.2	82646.3	83299.2	57985.2	33929.2	55306.2	56844.3	73361	64224.9	68825.9	47325.6	47134.3	59048.8	58439	46417.4	50584.9	58185.1	45011.6	42323.3	47624.8	60008.5	61950.2	49526.8
2-Ethylbutyl acetate		HMDB0031703	61448	NA	NA	4954824	5.14197e+06	4.41919e+06	4.82049e+06	5765679	5892011	5.07004e+06	5464260	4797286	3.64796e+06	4.84736e+06	6130662	5.12007e+06	6475661	5.90411e+06	3081296	7.21951e+06	9157299	6169049	7.69341e+06	5.73703e+06	7005724	9996086	5.16342e+06	4.68692e+06	1.93052e+06	3824784	3377617	6.38554e+06	4767635	4082351	9323195	7.81657e+06	11156823	10348903	7223643	7.55598e+06	8117199	11308355	7875526	7821792	9446027	7832668	10037557
2-Ethylhexyl phthalate		HMDB0013248	20393	17243	C03343	140551	150211	181075	155996	119656	135240	263915	117564	126307	137773	104935	121300	118729	138087	112620	98838.2	125480	131372	133774	117190	146438	116105	114124	130025	110114	93357.9	151723	115094	171804	98917.7	121241	113785	162176	204584	122427	124844	140483	297092	199355	212515	200406	259873	149136	183126
2-Ethylhexyl-4-hydroxybenzoate		HMDB0040431	23235	NA	C14716	79405.7	77014.7	64615.2	39276.2	49065.4	71669	52334.1	48857.7	65720.5	61057.7	61368.5	54725.2	46640.6	60385.6	62399.3	32300.1	52296	59950.6	39955.8	50356.4	52315.6	48547.6	48548.1	67934.1	40279.2	36668	51899.8	50269.3	52144.6	43672.2	42031.2	41954.3	45226.5	30687.1	34369.8	24898.6	24785	43373.5	26671.4	27065.9	34819.1	37909.8	39824.1	33989.1
2-Ethylidenehexanal		HMDB0037152	5463946	NA	NA	69843.6	78615.2	63940	66103.5	62192.9	55711	65202.7	80624	91736.6	102287	50228.8	65130.9	58881.1	62038.8	69958.4	29119.2	39570	55943.8	39152.8	67235.7	53858	44080.1	80048	64278.9	39105.8	43593.3	87947.1	53212.1	54701.4	51159.3	48326.9	56044.6	31629.5	61795.2	44705.4	41984	42903.3	57068.2	53858.8	30655.1	31250.8	62713.1	64284.5	50033.9
2-Ethylsuberic acid		HMDB0059708	19872	68453	NA	173498	164447	161661	128535	111052	103185	140700	136218	163703	131437	198614	167383	124118	145176	182277	80296.6	147206	144879	127018	148255	198248	117622	169483	143889	112854	85446.8	141604	129902	143257	136174	109569	131737	165731	228627	154641	144871	136930	213798	170355	193055	207393	257604	170982	249689
2-Hexenoylcarnitine		HMDB0013161	53481638	NA	NA	98852.5	148640	206532	95227.8	67834	67704.7	147116	92031	174383	104730	76356.1	176725	84866.1	166585	134965	74936	83816.4	188396	89131.7	81890.4	126074	163846	91390	83020.5	146480	56724.3	113985	78337.7	74557	111053	137049	28462.1	30985.6	25028.4	30340.2	24083.4	23124.6	47716	22690.7	22592	39421.9	27322.5	53726.5	20714.9
2-Hexenyl acetate		HMDB0040212	2733294	141209	NA	83695.1	81917.4	77648.2	93430.8	73293.4	78218.4	68261.6	59883.3	90296.4	81380.4	70828.3	77336.6	97751.7	61165.1	67996.6	57721.5	53827.8	67794.3	54063.9	75450.4	74457.6	60976.8	80425.2	78154.1	69819.7	69619.7	68942.2	62732.9	85502.3	69160.2	69030.1	82340.9	77460.4	97448.3	74460.6	78421.1	63975.1	80083.7	69837.5	63781.6	79658	96205.2	84787.9	84959.9
2-Hexenyl isovalerate		HMDB0038274	5352460	NA	NA	309034	320740	293821	269294	217104	283689	311343	362226	288594	268578	271059	298196	265667	311945	376786	205478	259773	331045	247427	291458	327829	265874	391031	354682	286991	228648	301005	247328	305922	248143	192236	79297.4	74478.3	86984.4	87988.8	61451.4	63170	86007.9	65822.3	57758.6	138894	79557.3	69502.4	59403.4
2-Hexenyl valerate		HMDB0038273	5352974	NA	NA	309034	320740	293821	269294	217104	283689	311343	362226	288594	268578	271059	298196	265667	311945	376786	205478	259773	331045	247427	291458	327829	265874	391031	354682	286991	228648	301005	247328	305922	248143	192236	79297.4	74478.3	86984.4	87988.8	61451.4	63170	86007.9	65822.3	57758.6	138894	79557.3	69502.4	59403.4
2-Hexyl-4,5-dimethyl-1,3-dioxolane		HMDB0032325	94886	NA	NA	1.69237e+06	2.03593e+06	1.91863e+06	1.48279e+06	1.27121e+06	1.57707e+06	2.09075e+06	1.89838e+06	1.92771e+06	1.75543e+06	1.51771e+06	1.82407e+06	1.44055e+06	1.84583e+06	2.4127e+06	1.11724e+06	1521156	2.04302e+06	1609977	1.77459e+06	2.2223e+06	1.56491e+06	2.2154e+06	1.98399e+06	1.73029e+06	1.23412e+06	1.65599e+06	1.2052e+06	1.69875e+06	1.35488e+06	1.21874e+06	298319	420139	511203	302649	268375	350309	670715	291895	289214	395764	515219	399649	605233
2-Hexyl-4,5-dimethyloxazole		HMDB0037895	525781	NA	NA	55691.6	50090.5	59847.1	56345.2	32780.5	42912.7	71514.6	63176.4	57799.3	35530.9	118111	57174.5	38775	45702.3	108898	57400.1	53446.2	39112	60662.1	28769.4	34440.9	51182.5	122514	76868.9	35260.8	32087.9	36011.5	60429.4	85942.1	57421	26340.4	37942.1	27758.1	29898.3	32087.2	27690.3	38878.2	41120.3	30023.6	35142.8	46570.8	31356.8	46030.3	28148.6
2-hydroxy-2-methyl-butyric acid		HMDB0001987	95433	68454	NA	1.107e+06	1.61645e+06	1.25292e+06	1.20826e+06	974962	1.28529e+06	1.18303e+06	1.32551e+06	1.4004e+06	1.38259e+06	1.54977e+06	1.08015e+06	1.37746e+06	1.63471e+06	1.40794e+06	1.14858e+06	2.27983e+06	1.44593e+06	991529	949075	3.1254e+06	3.34185e+06	1.50857e+06	1644150	1.7157e+06	2.53997e+06	901580	1.2353e+06	1.54439e+06	1.19634e+06	2.19382e+06	1.40347e+06	1.29212e+06	1.29809e+06	860963	985831	831446	1.11999e+06	709748	1.28068e+06	1.98068e+06	1.29784e+06	1.02892e+06	835987
2-Hydroxy-3-methylbutyric acid		HMDB0000407	99823	60645	NA	1.107e+06	1.61645e+06	1.25292e+06	1.20826e+06	974962	1.28529e+06	1.18303e+06	1.32551e+06	1.4004e+06	1.38259e+06	1.54977e+06	1.08015e+06	1.37746e+06	1.63471e+06	1.40794e+06	1.14858e+06	2.27983e+06	1.44593e+06	991529	949075	3.1254e+06	3.34185e+06	1.50857e+06	1644150	1.7157e+06	2.53997e+06	901580	1.2353e+06	1.54439e+06	1.19634e+06	2.19382e+06	1.40347e+06	1.29212e+06	1.29809e+06	860963	985831	831446	1.11999e+06	709748	1.28068e+06	1.98068e+06	1.29784e+06	1.02892e+06	835987
2-hydroxy-3-methyl-butyric acid		HMDB00407	853180	60631	NA	1.107e+06	1.61645e+06	1.25292e+06	1.20826e+06	974962	1.28529e+06	1.18303e+06	1.32551e+06	1.4004e+06	1.38259e+06	1.54977e+06	1.08015e+06	1.37746e+06	1.63471e+06	1.40794e+06	1.14858e+06	2.27983e+06	1.44593e+06	991529	949075	3.1254e+06	3.34185e+06	1.50857e+06	1644150	1.7157e+06	2.53997e+06	901580	1.2353e+06	1.54439e+06	1.19634e+06	2.19382e+06	1.40347e+06	1.29212e+06	1.29809e+06	860963	985831	831446	1.11999e+06	709748	1.28068e+06	1.98068e+06	1.29784e+06	1.02892e+06	835987
2-hydroxy-3-methyl-pentanoic acid		HMDB0000317	10796774	89228	NA	325808	397432	341500	309214	236865	242158	333978	275568	467726	339154	344064	309472	264954	371445	366957	203836	334007	327211	252096	272780	307163	293697	376911	401865	202274	237681	257716	213396	309933	338272	241916	120140	114052	122455	107787	123662	93379.2	107378	98495.5	152286	166687	134491	124153	123728
2-Hydroxy-3-oxoadipate		METPA0375	NA	16278	C03217	86009.7	53816.3	96898.4	158729	17359.2	22047.2	20894.4	15473	126020	219010	296910	33325.7	21528.4	355547	16976	21381	22904.3	42743.3	39629.5	31104.8	223303	161438	88976.9	116273	25044.4	26441.2	38892	12461.4	130659	17680.8	16443	95101.7	276626	156565	136583	95205.2	242368	68085.4	106681	93256.6	325512	160949	153976	183997
2-Hydroxy-4-methylbenzaldehyde		HMDB0032603	61200	NA	NA	68708.7	43528.7	48824.3	60176.8	52616.3	44124.8	56966.1	53439.2	87107.1	48783.8	38835.6	67959.7	41229.5	70931.5	102748	35358.7	59270.8	75816.7	48448.1	51040.8	47556.7	48478.1	70897.2	80392.3	44660.4	42313.2	64034.5	50219.4	82217.8	60804.1	53950.5	44770.6	35554.1	42831.3	32625.2	34227.4	42066.8	40043.4	40433.9	37215.5	34516.2	53182.6	56201.9	46961.7
2'-Hydroxyacetophenone		HMDB0032568	8375	28341	C07189	68708.7	43528.7	48824.3	60176.8	52616.3	44124.8	56966.1	53439.2	87107.1	48783.8	38835.6	67959.7	41229.5	70931.5	102748	35358.7	59270.8	75816.7	48448.1	51040.8	47556.7	48478.1	70897.2	80392.3	44660.4	42313.2	64034.5	50219.4	82217.8	60804.1	53950.5	44770.6	35554.1	42831.3	32625.2	34227.4	42066.8	40043.4	40433.9	37215.5	34516.2	53182.6	56201.9	46961.7
2-Hydroxyacetophenone		HMDB0032568	8375	28341	C07189	68708.7	43528.7	48824.3	60176.8	52616.3	44124.8	56966.1	53439.2	87107.1	48783.8	38835.6	67959.7	41229.5	70931.5	102748	35358.7	59270.8	75816.7	48448.1	51040.8	47556.7	48478.1	70897.2	80392.3	44660.4	42313.2	64034.5	50219.4	82217.8	60804.1	53950.5	44770.6	35554.1	42831.3	32625.2	34227.4	42066.8	40043.4	40433.9	37215.5	34516.2	53182.6	56201.9	46961.7
2-Hydroxylinolenic acid		HMDB0031103	131751135	NA	NA	109803	68765.2	152432	103728	96054.6	105065	184247	175878	152240	131321	111445	172128	165379	151450	127642	155512	119241	140214	114824	115476	180514	167263	118973	137815	118296	326696	181050	88933.3	171286	156978	63798.6	68099.2	46489.8	85053.5	80878.2	80988	69600.5	78959.3	64104.3	49585	127516	62877.4	111900	89391.9
2-Hydroxy-p-mentha-1,8-dien-6-one		HMDB0037012	380816	NA	NA	125608	137869	162940	113897	69438.4	111236	117134	113408	198233	166327	113129	95501.3	111009	147315	107696	60184.6	127233	122066	126081	85493.6	102991	85812.9	142585	174777	76043.9	70660.7	81507.4	79837	108682	119309	97758.3	119131	165126	126387	117883	174560	128250	242214	153779	147094	177844	156160	190980	161819
2-Hydroxypyridine		HMDB0013751	8871	16540	C02502	262161	255156	250638	269405	215844	271785	270564	202922	236821	317497	239239	271855	289303	215264	247199	217090	238269	301968	209316	285869	251203	221560	228193	237011	207291	226169	223329	205188	227842	221008	205888	317819	352672	306103	389072	307813	309376	316673	340215	320050	415610	294412	407975	297922
2-Isopropyl-3-methoxypyrazine		HMDB0040340	33166	NA	NA	40493.7	67701.4	39607.4	33745.3	36636.8	46528.2	44258.7	32195.2	33782.2	52136.5	33089.6	36346.3	38529.2	27447.3	21062.8	32192	30637.1	34238.4	41503.8	34221.9	22428.8	39145.9	31897.2	39988.2	32509.2	50000.3	39289.7	45537.2	37061.4	32568.4	43220.6	25142.2	68073.3	44646.8	26477.5	32863.7	36257.1	19327.3	40085.8	20965.6	40690.1	68312.2	36441	21832.3
2-Isopropyl-5-methoxypyrazine		HMDB0040052	92558	NA	NA	40493.7	67701.4	39607.4	33745.3	36636.8	46528.2	44258.7	32195.2	33782.2	52136.5	33089.6	36346.3	38529.2	27447.3	21062.8	32192	30637.1	34238.4	41503.8	34221.9	22428.8	39145.9	31897.2	39988.2	32509.2	50000.3	39289.7	45537.2	37061.4	32568.4	43220.6	25142.2	68073.3	44646.8	26477.5	32863.7	36257.1	19327.3	40085.8	20965.6	40690.1	68312.2	36441	21832.3
2-Isopropyl-6-methoxypyrazine		HMDB0040053	106441	NA	NA	40493.7	67701.4	39607.4	33745.3	36636.8	46528.2	44258.7	32195.2	33782.2	52136.5	33089.6	36346.3	38529.2	27447.3	21062.8	32192	30637.1	34238.4	41503.8	34221.9	22428.8	39145.9	31897.2	39988.2	32509.2	50000.3	39289.7	45537.2	37061.4	32568.4	43220.6	25142.2	68073.3	44646.8	26477.5	32863.7	36257.1	19327.3	40085.8	20965.6	40690.1	68312.2	36441	21832.3
2-Isopropylfuran		HMDB0040278	12200728	NA	NA	97984.1	124415	119364	98293.8	113318	108631	113201	89487.2	121505	90633.1	109946	81038.3	92123.7	137093	112446	67344.8	102485	124800	124744	93317.6	99796	97648.3	110335	168241	76394.9	71351.9	83395.9	90177.3	93822.7	98361.7	139903	110328	89751.9	45925.4	52817.1	123299	76061.2	70716.6	84523.9	72564	103595	58479.4	68695.9	51274.6
2-Methoxy-(3 or 5 or 6)-isopropylpyrazine		HMDB0032381	13256887	NA	NA	40493.7	67701.4	39607.4	33745.3	36636.8	46528.2	44258.7	32195.2	33782.2	52136.5	33089.6	36346.3	38529.2	27447.3	21062.8	32192	30637.1	34238.4	41503.8	34221.9	22428.8	39145.9	31897.2	39988.2	32509.2	50000.3	39289.7	45537.2	37061.4	32568.4	43220.6	25142.2	68073.3	44646.8	26477.5	32863.7	36257.1	19327.3	40085.8	20965.6	40690.1	68312.2	36441	21832.3
2-Methoxy-4-propylphenol		HMDB0032135	17739	NA	NA	125608	137869	162940	113897	69438.4	111236	117134	113408	198233	166327	113129	95501.3	111009	147315	107696	60184.6	127233	122066	126081	85493.6	102991	85812.9	142585	174777	76043.9	70660.7	81507.4	79837	108682	119309	97758.3	119131	165126	126387	117883	174560	128250	242214	153779	147094	177844	156160	190980	161819
2-Methoxybenzaldehyde		HMDB0033766	8658	NA	NA	68708.7	43528.7	48824.3	60176.8	52616.3	44124.8	56966.1	53439.2	87107.1	48783.8	38835.6	67959.7	41229.5	70931.5	102748	35358.7	59270.8	75816.7	48448.1	51040.8	47556.7	48478.1	70897.2	80392.3	44660.4	42313.2	64034.5	50219.4	82217.8	60804.1	53950.5	44770.6	35554.1	42831.3	32625.2	34227.4	42066.8	40043.4	40433.9	37215.5	34516.2	53182.6	56201.9	46961.7
2-Methyl-2-pentenoic acid		HMDB0031560	6436344	NA	NA	34268.5	41824.2	35106.6	33477.2	26908.6	25498.6	20700.8	25431.6	29058.4	54635.9	36317.1	21701.8	32713	30171.6	25063.2	24736.9	42240.8	34513.8	29363.7	21539.5	41238	27241.5	31996.4	38251.2	27664.1	28445.2	36077.6	29127.1	46560.4	25445.9	30581.6	48619.4	51196.1	43480.4	66593.1	114095	57434.8	130957	79610.3	40931.3	47211.8	52152.9	121125	54604.3
2-Methyl-3-heptanone		HMDB0032402	25611	NA	NA	78455.7	65344.3	83608.7	64943.9	79512.6	59021.4	76686.4	92972.8	74609.5	87474	75396.3	67367.8	63850.3	54698.8	79092.8	38729	47039.2	65392.8	44689	66409.2	63031.6	53986.8	98142.6	87254.1	62420.1	47849	83815.5	49708.2	78847.6	48770.1	41515	62052.1	49549.7	69056.4	60690.3	35418	50869.3	53883.8	58666.7	42025.4	53045.4	79185.9	69060.6	54148.4
2-methyl-3-hydroxybutyric acid		HMDB0000354	160471	37051	NA	1.107e+06	1.61645e+06	1.25292e+06	1.20826e+06	974962	1.28529e+06	1.18303e+06	1.32551e+06	1.4004e+06	1.38259e+06	1.54977e+06	1.08015e+06	1.37746e+06	1.63471e+06	1.40794e+06	1.14858e+06	2.27983e+06	1.44593e+06	991529	949075	3.1254e+06	3.34185e+06	1.50857e+06	1644150	1.7157e+06	2.53997e+06	901580	1.2353e+06	1.54439e+06	1.19634e+06	2.19382e+06	1.40347e+06	1.29212e+06	1.29809e+06	860963	985831	831446	1.11999e+06	709748	1.28068e+06	1.98068e+06	1.29784e+06	1.02892e+06	835987
2-Methyl-3-hydroxyvaleric acid		HMDB0029166	152968	NA	NA	325808	397432	341500	309214	236865	242158	333978	275568	467726	339154	344064	309472	264954	371445	366957	203836	334007	327211	252096	272780	307163	293697	376911	401865	202274	237681	257716	213396	309933	338272	241916	120140	114052	122455	107787	123662	93379.2	107378	98495.5	152286	166687	134491	124153	123728
2-Methyl-3-pentenoic acid		HMDB0031562	71587183	NA	NA	34268.5	41824.2	35106.6	33477.2	26908.6	25498.6	20700.8	25431.6	29058.4	54635.9	36317.1	21701.8	32713	30171.6	25063.2	24736.9	42240.8	34513.8	29363.7	21539.5	41238	27241.5	31996.4	38251.2	27664.1	28445.2	36077.6	29127.1	46560.4	25445.9	30581.6	48619.4	51196.1	43480.4	66593.1	114095	57434.8	130957	79610.3	40931.3	47211.8	52152.9	121125	54604.3
2-Methyl-4-pentenoic acid		HMDB0031158	549519	NA	NA	34268.5	41824.2	35106.6	33477.2	26908.6	25498.6	20700.8	25431.6	29058.4	54635.9	36317.1	21701.8	32713	30171.6	25063.2	24736.9	42240.8	34513.8	29363.7	21539.5	41238	27241.5	31996.4	38251.2	27664.1	28445.2	36077.6	29127.1	46560.4	25445.9	30581.6	48619.4	51196.1	43480.4	66593.1	114095	57434.8	130957	79610.3	40931.3	47211.8	52152.9	121125	54604.3
2-Methylallyl butyrate		HMDB0036236	251530	NA	NA	83695.1	81917.4	77648.2	93430.8	73293.4	78218.4	68261.6	59883.3	90296.4	81380.4	70828.3	77336.6	97751.7	61165.1	67996.6	57721.5	53827.8	67794.3	54063.9	75450.4	74457.6	60976.8	80425.2	78154.1	69819.7	69619.7	68942.2	62732.9	85502.3	69160.2	69030.1	82340.9	77460.4	97448.3	74460.6	78421.1	63975.1	80083.7	69837.5	63781.6	79658	96205.2	84787.9	84959.9
2-Methylbenzyl alcohol acetate		HMDB0041472	87085	NA	C07213	319857	360362	339209	294864	228467	318225	320920	294556	366724	307306	281947	314430	291533	318799	391287	246331	823553	543953	325456	761641	329494	277535	871394	326916	267529	187581	292959	203942	315391	243716	205839	82776.2	110117	97077.6	225574	51406.6	43058.9	110897	113319	57713.3	64605.6	159978	94811.4	64758.7
2-Methylbutyl 2-methylbutanoate		HMDB0039218	17129	NA	NA	9949007	11504798	11419062	9327990	7611035	10557322	12258934	11924596	11121203	10087879	8976714	11839756	8963184	10683619	14898223	6.08635e+06	9378611	12510601	10533930	10980307	12879971	9452784	13969028	11505806	9738459	7.43292e+06	9378756	7251482	9339049	8226159	6.97687e+06	2.77864e+06	3.51156e+06	5.40678e+06	3.36879e+06	2.54327e+06	3.71239e+06	5.53706e+06	3.01635e+06	2.83467e+06	3.79552e+06	4814188	3.59266e+06	5.48434e+06
2-Methylbutyl 3-methyl-2-butenoate		HMDB0032393	113425	NA	NA	403094	487353	495635	440662	329030	444513	463203	477301	503970	457144	413035	485976	370373	462660	608536	244537	382065	482415	408085	507728	526754	430094	599832	514565	407043	323168	416666	333202	431254	339426	338844	164164	125509	173980	161805	126286	154237	207961	131391	130946	231210	181746	183962	171513
2-Methylbutyl 3-methylbutanoate		HMDB0038038	62445	NA	NA	9949007	11504798	11419062	9327990	7611035	10557322	12258934	11924596	11121203	10087879	8976714	11839756	8963184	10683619	14898223	6.08635e+06	9378611	12510601	10533930	10980307	12879971	9452784	13969028	11505806	9738459	7.43292e+06	9378756	7251482	9339049	8226159	6.97687e+06	2.77864e+06	3.51156e+06	5.40678e+06	3.36879e+06	2.54327e+06	3.71239e+06	5.53706e+06	3.01635e+06	2.83467e+06	3.79552e+06	4814188	3.59266e+06	5.48434e+06
2-Methylbutyl acetate		HMDB0034166	12209	50585	NA	1932490	2.05705e+06	1.87968e+06	1.95561e+06	1428820	2018299	2321765	2.21171e+06	2.18895e+06	1.55261e+06	1.65363e+06	2.01794e+06	1.6277e+06	1.92967e+06	2949656	1.03395e+06	1.80162e+06	2.40727e+06	1.94378e+06	2.37845e+06	1.89925e+06	1.93736e+06	2.65658e+06	2244925	1.91416e+06	936736	1.58099e+06	1.48376e+06	1.76527e+06	1.55873e+06	1486326	2.97911e+06	2547794	4.40414e+06	3.04848e+06	2.59234e+06	2801523	2935630	3807720	2620054	2618856	3.38579e+06	3001957	3.93279e+06
2-Methylbutyl hexanoate		HMDB0059860	102855	NA	NA	1.69237e+06	2.03593e+06	1.91863e+06	1.48279e+06	1.27121e+06	1.57707e+06	2.09075e+06	1.89838e+06	1.92771e+06	1.75543e+06	1.51771e+06	1.82407e+06	1.44055e+06	1.84583e+06	2.4127e+06	1.11724e+06	1521156	2.04302e+06	1609977	1.77459e+06	2.2223e+06	1.56491e+06	2.2154e+06	1.98399e+06	1.73029e+06	1.23412e+06	1.65599e+06	1.2052e+06	1.69875e+06	1.35488e+06	1.21874e+06	298319	420139	511203	302649	268375	350309	670715	291895	289214	395764	515219	399649	605233
2-Methylheptanoic acid		HMDB0031587	14475	NA	NA	4954824	5.14197e+06	4.41919e+06	4.82049e+06	5765679	5892011	5.07004e+06	5464260	4797286	3.64796e+06	4.84736e+06	6130662	5.12007e+06	6475661	5.90411e+06	3081296	7.21951e+06	9157299	6169049	7.69341e+06	5.73703e+06	7005724	9996086	5.16342e+06	4.68692e+06	1.93052e+06	3824784	3377617	6.38554e+06	4767635	4082351	9323195	7.81657e+06	11156823	10348903	7223643	7.55598e+06	8117199	11308355	7875526	7821792	9446027	7832668	10037557
2-Methylhexanoic acid		HMDB0031594	20653	NA	NA	1932490	2.05705e+06	1.87968e+06	1.95561e+06	1428820	2018299	2321765	2.21171e+06	2.18895e+06	1.55261e+06	1.65363e+06	2.01794e+06	1.6277e+06	1.92967e+06	2949656	1.03395e+06	1.80162e+06	2.40727e+06	1.94378e+06	2.37845e+06	1.89925e+06	1.93736e+06	2.65658e+06	2244925	1.91416e+06	936736	1.58099e+06	1.48376e+06	1.76527e+06	1.55873e+06	1486326	2.97911e+06	2547794	4.40414e+06	3.04848e+06	2.59234e+06	2801523	2935630	3807720	2620054	2618856	3.38579e+06	3001957	3.93279e+06
2-Methylhippuric acid		HMDB0011723	91637	68455	C01586	6587127	4.16879e+06	6.30587e+06	7792590	4.18358e+06	1.74925e+06	5.40687e+06	3.61735e+06	11999195	11344791	9277816	5.75582e+06	2384798	2.46608e+06	5150483	3.46516e+06	13389025	4.71414e+06	3.93841e+06	4.68055e+06	7.57211e+06	5965610	3.18663e+06	7.46534e+06	2.5519e+06	2.15357e+06	2528101	2.98205e+06	2.38889e+06	5290917	5.17531e+06	4.40393e+06	6.08301e+06	7.02355e+06	4.0611e+06	1.88017e+06	3.30362e+06	2880879	5.28289e+06	3697161	4.27324e+06	8676850	17222070	7.97825e+06
2-Methylpentanal		HMDB0031578	31245	NA	NA	68246.8	83025.3	90228.6	82355.9	60371	52449.1	65304.2	57858.9	73487.2	61006.2	63588.6	72858.2	68669.2	66007.4	80947.1	43598.9	51475	60406.7	59755.3	74676.6	64620.4	56799.2	82646.3	83299.2	57985.2	33929.2	55306.2	56844.3	73361	64224.9	68825.9	47325.6	47134.3	59048.8	58439	46417.4	50584.9	58185.1	45011.6	42323.3	47624.8	60008.5	61950.2	49526.8
2-Methylpropanal		HMDB0031243	6561	48943	C03219	48236.3	29350.7	33855.1	46118.4	32337.8	28957.8	41997.4	32439.3	37516.7	32582.6	32693	32609.9	43637.7	43428.7	49069.4	35845.1	36444.6	38893.8	29925.8	32008.9	25933.7	43836.3	36810.5	42137.4	28203.8	38745.5	50197.3	31346.9	41080.5	40564.2	41881.7	51791.2	56221.1	64225.4	64085.8	70667.8	52907.6	53664.1	45199.5	55208.6	67477.5	67772.4	53169.3	77638
2-Methylpropyl (2E)-butenoate		HMDB0036212	6435824	NA	NA	83695.1	81917.4	77648.2	93430.8	73293.4	78218.4	68261.6	59883.3	90296.4	81380.4	70828.3	77336.6	97751.7	61165.1	67996.6	57721.5	53827.8	67794.3	54063.9	75450.4	74457.6	60976.8	80425.2	78154.1	69819.7	69619.7	68942.2	62732.9	85502.3	69160.2	69030.1	82340.9	77460.4	97448.3	74460.6	78421.1	63975.1	80083.7	69837.5	63781.6	79658	96205.2	84787.9	84959.9
2-Methylpropyl 2-methylpropionate		HMDB0040252	7351	NA	NA	4954824	5.14197e+06	4.41919e+06	4.82049e+06	5765679	5892011	5.07004e+06	5464260	4797286	3.64796e+06	4.84736e+06	6130662	5.12007e+06	6475661	5.90411e+06	3081296	7.21951e+06	9157299	6169049	7.69341e+06	5.73703e+06	7005724	9996086	5.16342e+06	4.68692e+06	1.93052e+06	3824784	3377617	6.38554e+06	4767635	4082351	9323195	7.81657e+06	11156823	10348903	7223643	7.55598e+06	8117199	11308355	7875526	7821792	9446027	7832668	10037557
2-Methylpropyl 3-hydroxy-2-methylidenebutanoate		HMDB0040203	546207	NA	NA	1.10711e+06	1.31182e+06	1.11279e+06	1.0609e+06	708269	1.0635e+06	1.11293e+06	948679	1.34083e+06	1088378	1344857	1.07417e+06	975406	1193672	1.47277e+06	915421	799650	1.07559e+06	1.04515e+06	998577	1.14729e+06	1093040	1683246	1.22389e+06	826318	878308	1.16112e+06	990792	1.11744e+06	898486	894253	701173	398265	415068	533082	456364	548269	788674	363725	311804	545263	401831	661026	358165
2-Methylpropyl 3-methylbutanoate		HMDB0038040	11514	89086	NA	31059080	36333212	35153816	31346394	26063910	34265028	37671056	37614436	32756472	31222842	25990618	35452616	24216608	31566360	49759612	18183924	29314668	36772668	29634554	34388456	37593128	31483394	42794468	35495564	31823804	20526698	28560828	22274504	30226706	26423828	20904814	21439336	16472399	28092744	17140688	14065325	19779730	23878034	20280954	17347108	17172318	22708688	19138784	27444522
2-Methylpropyl 3-oxobutanoate		HMDB0036395	522677	NA	NA	725537	909899	730622	661799	538843	590477	709836	769860	872325	735692	576060	751613	629733	809478	873124	356186	678111	785050	609766	585886	755381	538295	714600	879770	470162	443530	632329	476894	687153	645897	543934	629235	455056	444668	450805	589883	435334	799372	417877	411818	597636	414990	858311	421107
2-Methylpropyl acetate		HMDB0031246	8038	50569	NA	2.28202e+06	2.44802e+06	2.67102e+06	2.37729e+06	1.93155e+06	2.6323e+06	2.47014e+06	2.29271e+06	2.73045e+06	2.28869e+06	1.81642e+06	2.91286e+06	2123246	2.36444e+06	3.60295e+06	1.21265e+06	2.30287e+06	2725161	2.07744e+06	2.60667e+06	2.36361e+06	2.30766e+06	2.52162e+06	2.78959e+06	2.28737e+06	1.12185e+06	2.00102e+06	1.85176e+06	2.33975e+06	2.17494e+06	1.74504e+06	5.44662e+06	5.28788e+06	8102586	5.45059e+06	5136677	5261508	5.85648e+06	7194426	4609864	5.51374e+06	5.88861e+06	7103756	7120424
2-Methylpropyl butanoate		HMDB0034161	10885	87683	NA	4954824	5.14197e+06	4.41919e+06	4.82049e+06	5765679	5892011	5.07004e+06	5464260	4797286	3.64796e+06	4.84736e+06	6130662	5.12007e+06	6475661	5.90411e+06	3081296	7.21951e+06	9157299	6169049	7.69341e+06	5.73703e+06	7005724	9996086	5.16342e+06	4.68692e+06	1.93052e+06	3824784	3377617	6.38554e+06	4767635	4082351	9323195	7.81657e+06	11156823	10348903	7223643	7.55598e+06	8117199	11308355	7875526	7821792	9446027	7832668	10037557
2-Methylpropyl hexanoate		HMDB0036228	7775	87421	NA	9949007	11504798	11419062	9327990	7611035	10557322	12258934	11924596	11121203	10087879	8976714	11839756	8963184	10683619	14898223	6.08635e+06	9378611	12510601	10533930	10980307	12879971	9452784	13969028	11505806	9738459	7.43292e+06	9378756	7251482	9339049	8226159	6.97687e+06	2.77864e+06	3.51156e+06	5.40678e+06	3.36879e+06	2.54327e+06	3.71239e+06	5.53706e+06	3.01635e+06	2.83467e+06	3.79552e+06	4814188	3.59266e+06	5.48434e+06
2-Methylpropyl propionate		HMDB0034239	10895	88813	NA	1932490	2.05705e+06	1.87968e+06	1.95561e+06	1428820	2018299	2321765	2.21171e+06	2.18895e+06	1.55261e+06	1.65363e+06	2.01794e+06	1.6277e+06	1.92967e+06	2949656	1.03395e+06	1.80162e+06	2.40727e+06	1.94378e+06	2.37845e+06	1.89925e+06	1.93736e+06	2.65658e+06	2244925	1.91416e+06	936736	1.58099e+06	1.48376e+06	1.76527e+06	1.55873e+06	1486326	2.97911e+06	2547794	4.40414e+06	3.04848e+06	2.59234e+06	2801523	2935630	3807720	2620054	2618856	3.38579e+06	3001957	3.93279e+06
2-n-Propyl-2-pentenoic acid		HMDB0032459	638122	38366	NA	83695.1	81917.4	77648.2	93430.8	73293.4	78218.4	68261.6	59883.3	90296.4	81380.4	70828.3	77336.6	97751.7	61165.1	67996.6	57721.5	53827.8	67794.3	54063.9	75450.4	74457.6	60976.8	80425.2	78154.1	69819.7	69619.7	68942.2	62732.9	85502.3	69160.2	69030.1	82340.9	77460.4	97448.3	74460.6	78421.1	63975.1	80083.7	69837.5	63781.6	79658	96205.2	84787.9	84959.9
2-n-Propyl-3-pentenoic acid		HMDB0013903	24892812	NA	C16654	83695.1	81917.4	77648.2	93430.8	73293.4	78218.4	68261.6	59883.3	90296.4	81380.4	70828.3	77336.6	97751.7	61165.1	67996.6	57721.5	53827.8	67794.3	54063.9	75450.4	74457.6	60976.8	80425.2	78154.1	69819.7	69619.7	68942.2	62732.9	85502.3	69160.2	69030.1	82340.9	77460.4	97448.3	74460.6	78421.1	63975.1	80083.7	69837.5	63781.6	79658	96205.2	84787.9	84959.9
2-n-Propyl-4-oxopentanoic acid		HMDB0060683	3731686	NA	C16655	725537	909899	730622	661799	538843	590477	709836	769860	872325	735692	576060	751613	629733	809478	873124	356186	678111	785050	609766	585886	755381	538295	714600	879770	470162	443530	632329	476894	687153	645897	543934	629235	455056	444668	450805	589883	435334	799372	417877	411818	597636	414990	858311	421107
2-Octanone		HMDB0031294	8093	87434	NA	78455.7	65344.3	83608.7	64943.9	79512.6	59021.4	76686.4	92972.8	74609.5	87474	75396.3	67367.8	63850.3	54698.8	79092.8	38729	47039.2	65392.8	44689	66409.2	63031.6	53986.8	98142.6	87254.1	62420.1	47849	83815.5	49708.2	78847.6	48770.1	41515	62052.1	49549.7	69056.4	60690.3	35418	50869.3	53883.8	58666.7	42025.4	53045.4	79185.9	69060.6	54148.4
2-Octen-4-one		HMDB0031301	12409825	NA	NA	69843.6	78615.2	63940	66103.5	62192.9	55711	65202.7	80624	91736.6	102287	50228.8	65130.9	58881.1	62038.8	69958.4	29119.2	39570	55943.8	39152.8	67235.7	53858	44080.1	80048	64278.9	39105.8	43593.3	87947.1	53212.1	54701.4	51159.3	48326.9	56044.6	31629.5	61795.2	44705.4	41984	42903.3	57068.2	53858.8	30655.1	31250.8	62713.1	64284.5	50033.9
2-Octenal		HMDB0030961	6427080	NA	NA	69843.6	78615.2	63940	66103.5	62192.9	55711	65202.7	80624	91736.6	102287	50228.8	65130.9	58881.1	62038.8	69958.4	29119.2	39570	55943.8	39152.8	67235.7	53858	44080.1	80048	64278.9	39105.8	43593.3	87947.1	53212.1	54701.4	51159.3	48326.9	56044.6	31629.5	61795.2	44705.4	41984	42903.3	57068.2	53858.8	30655.1	31250.8	62713.1	64284.5	50033.9
2-Octenyl acetate		HMDB0031297	12807117	NA	NA	403094	487353	495635	440662	329030	444513	463203	477301	503970	457144	413035	485976	370373	462660	608536	244537	382065	482415	408085	507728	526754	430094	599832	514565	407043	323168	416666	333202	431254	339426	338844	164164	125509	173980	161805	126286	154237	207961	131391	130946	231210	181746	183962	171513
2-Oxo-4-hydroxy-5-aminovalerate		METPA0720	NA	1241	C05941	5.80809e+06	7.06151e+06	6.62278e+06	5990323	7638704	7.46656e+06	7101270	10406814	7.93689e+06	5.67973e+06	5.66756e+06	6009460	6.16445e+06	5.69839e+06	7310123	11250793	11493082	9309820	8845775	14076279	6796778	6265097	12129724	6.51872e+06	4.82738e+06	7.73812e+06	5.51663e+06	5040238	7986673	5599903	6.00351e+06	5257871	6833903	6684500	6720563	8773508	5.01219e+06	5387662	6.56391e+06	6916141	5.76526e+06	5644493	6105444	8.1353e+06
2-Oxoglutaramate		HMDB0001552	48	30882	C00940	65208.2	74611.3	72839.7	89761.4	59686.5	74341.3	71884.6	64128.7	74983.5	88911.4	81326.9	60609.5	85960.3	66901.2	87312.7	59483.6	93583.5	156239	67761.4	118765	84825.7	105026	100989	90994	68031.6	75463.5	57319.5	62360.3	67965.1	62772.9	79839.1	84172.9	84212.5	103256	75932.1	75549.3	59407.8	77868.7	78535.6	70292.8	102359	110949	84214.4	111024
2-Oxoglutarate		HMDB0000208	51	30915	C00026	565769	769254	724870	466766	872627	891142	717712	1.09402e+06	542823	488448	611947	635900	760856	695620	789646	1.31487e+06	1.36864e+06	1309284	927179	1.62181e+06	1.00036e+06	800706	931377	778597	734617	597023	688524	597968	922982	847934	832112	686481	517598	505763	849670	590742	470937	511805	768763	653276	708175	448122	450988	660151
2-Oxohexane		HMDB0005842	11583	89206	NA	68246.8	83025.3	90228.6	82355.9	60371	52449.1	65304.2	57858.9	73487.2	61006.2	63588.6	72858.2	68669.2	66007.4	80947.1	43598.9	51475	60406.7	59755.3	74676.6	64620.4	56799.2	82646.3	83299.2	57985.2	33929.2	55306.2	56844.3	73361	64224.9	68825.9	47325.6	47134.3	59048.8	58439	46417.4	50584.9	58185.1	45011.6	42323.3	47624.8	60008.5	61950.2	49526.8
2-Pentenal		HMDB0031601	12365893	NA	NA	75519.4	80879.1	67980.6	87867.8	61007.5	61489.5	61430	56223.3	56604.2	78104.3	68954.1	84552.6	59839.8	86573.8	71819.4	65029.5	58213.9	54010.2	68718.4	39045.8	79992.7	58417.2	128319	51115	76859.9	69534.4	84998.8	61067.6	71433.4	76576.7	70756.6	80120.5	64817.1	60440.7	51578.2	55921.9	74286.1	89296.9	38499.3	46812.9	45178.3	56000.1	72622	54148.8
2-Phenoxyethyl isobutyrate		HMDB0040218	61005	NA	NA	45176	45628.5	51174	34194	22415.2	39135.1	26801.2	24636.3	51815.2	50444.6	31284.9	41873.3	35140.4	29461.5	47013	20175.3	37899.1	26876.7	29734.7	20121.4	28143	43389.1	50165.4	39652.5	30522.9	30218.9	27476.8	26820.2	48262.9	25679.8	29160.9	62292.7	47120.5	31420	45543.4	82195.1	40295.9	108252	45469.3	33411.6	79106	53372.2	123836	40799.1
2-Phenylbutyric acid		HMDB0000329	7012	86545	NA	319857	360362	339209	294864	228467	318225	320920	294556	366724	307306	281947	314430	291533	318799	391287	246331	823553	543953	325456	761641	329494	277535	871394	326916	267529	187581	292959	203942	315391	243716	205839	82776.2	110117	97077.6	225574	51406.6	43058.9	110897	113319	57713.3	64605.6	159978	94811.4	64758.7
2-Propenyl heptanoate		HMDB0040208	8878	NA	NA	403094	487353	495635	440662	329030	444513	463203	477301	503970	457144	413035	485976	370373	462660	608536	244537	382065	482415	408085	507728	526754	430094	599832	514565	407043	323168	416666	333202	431254	339426	338844	164164	125509	173980	161805	126286	154237	207961	131391	130946	231210	181746	183962	171513
2-Propenyl octanoate		HMDB0040593	20219	NA	NA	309034	320740	293821	269294	217104	283689	311343	362226	288594	268578	271059	298196	265667	311945	376786	205478	259773	331045	247427	291458	327829	265874	391031	354682	286991	228648	301005	247328	305922	248143	192236	79297.4	74478.3	86984.4	87988.8	61451.4	63170	86007.9	65822.3	57758.6	138894	79557.3	69502.4	59403.4
2-Propylfuran		HMDB0040277	77907	NA	NA	97984.1	124415	119364	98293.8	113318	108631	113201	89487.2	121505	90633.1	109946	81038.3	92123.7	137093	112446	67344.8	102485	124800	124744	93317.6	99796	97648.3	110335	168241	76394.9	71351.9	83395.9	90177.3	93822.7	98361.7	139903	110328	89751.9	45925.4	52817.1	123299	76061.2	70716.6	84523.9	72564	103595	58479.4	68695.9	51274.6
2-Pyrroloylglycine		HMDB0059778	21126202	NA	NA	57474.3	43336.4	46456.9	14407.2	121680	100307	117639	105146	18690.7	19559.3	15666.8	47396.2	132425	79686.6	107293	101281	60007.5	99675.1	56198.9	45173.6	41842.3	29687.3	28179.5	52079.6	103525	286740	113883	78363.7	58127.2	92568.9	91914.8	88008.9	27448	24948.8	25442	18033.4	30416.6	20244.5	21554.5	38123.2	49532.4	19151.5	19830.4	13281.2
2-tert-Butyl-1,4-benzenediol		HMDB0032062	16043	78886	NA	125608	137869	162940	113897	69438.4	111236	117134	113408	198233	166327	113129	95501.3	111009	147315	107696	60184.6	127233	122066	126081	85493.6	102991	85812.9	142585	174777	76043.9	70660.7	81507.4	79837	108682	119309	97758.3	119131	165126	126387	117883	174560	128250	242214	153779	147094	177844	156160	190980	161819
3-(1-Pyrrolidinyl)-2-butanone		HMDB0039840	23388489	NA	NA	52320.8	61739.3	101428	67150.9	60563.1	64199.4	67604.7	60784.1	70883.8	60191.7	93304.4	64410.6	52032.8	59532.5	89100.9	43664.7	75606.8	59970.1	60348.8	53988.4	61945.6	58399.6	77023.5	121753	47671.7	73549.5	58866.2	67264.2	75975.6	64832.2	48545.5	50179.4	55873.4	45179.2	39439.4	46051.3	42504.8	63464.7	45918.3	37959.7	59419.5	47484.8	76015.4	43499.8
3-(3-Ethyloxiranyl)-2-propenal		HMDB0034835	6444055	NA	NA	44527.8	38993	49939.9	33315.1	36861	39517.2	29847.9	28948.7	34893.1	51301.7	36034.5	31718.3	32598.4	41186	37746.6	26228.5	30983.7	34968.3	28658.7	34442.3	38471.1	31565.1	37294	39566.7	44184.7	29332.1	37357.3	31230.4	31835.1	30813.1	29212.8	46181.9	49299.9	35719.4	54526.2	68550.1	49160.3	56809.8	51342.4	56083.4	55079.3	65128.9	51810.2	46301.8
3-(3-Furanyl)-2-methyl-2-propenal		HMDB0040638	131258126	NA	NA	68708.7	43528.7	48824.3	60176.8	52616.3	44124.8	56966.1	53439.2	87107.1	48783.8	38835.6	67959.7	41229.5	70931.5	102748	35358.7	59270.8	75816.7	48448.1	51040.8	47556.7	48478.1	70897.2	80392.3	44660.4	42313.2	64034.5	50219.4	82217.8	60804.1	53950.5	44770.6	35554.1	42831.3	32625.2	34227.4	42066.8	40043.4	40433.9	37215.5	34516.2	53182.6	56201.9	46961.7
3-(4-Hydroxy-3-methoxyphenyl)-1,2-propanediol		HMDB0033093	161566	125366	NA	26771.8	26920.9	36438.9	27563.2	24175.7	26688.8	24814.6	19594.8	40371.3	37100.1	39233.9	39637.4	29362.7	31115.6	38607.5	16412.3	25980.1	26939.5	32274.7	22367.6	28163.7	35621.6	23877.7	38096.1	19653.9	26501.9	29459.1	21171.9	44009.7	33353.9	20259	25953.2	57428.5	33063.5	35804	39932.4	30209.2	74966.6	29082.6	22442.6	32136	55650.3	64242.3	46928
3-(4-Methoxyphenyl)-2-propen-1-ol		HMDB0032586	5314180	NA	NA	319857	360362	339209	294864	228467	318225	320920	294556	366724	307306	281947	314430	291533	318799	391287	246331	823553	543953	325456	761641	329494	277535	871394	326916	267529	187581	292959	203942	315391	243716	205839	82776.2	110117	97077.6	225574	51406.6	43058.9	110897	113319	57713.3	64605.6	159978	94811.4	64758.7
3-(5-Methyl-2-furyl)prop-2-enal		HMDB0032400	11434978	NA	NA	68708.7	43528.7	48824.3	60176.8	52616.3	44124.8	56966.1	53439.2	87107.1	48783.8	38835.6	67959.7	41229.5	70931.5	102748	35358.7	59270.8	75816.7	48448.1	51040.8	47556.7	48478.1	70897.2	80392.3	44660.4	42313.2	64034.5	50219.4	82217.8	60804.1	53950.5	44770.6	35554.1	42831.3	32625.2	34227.4	42066.8	40043.4	40433.9	37215.5	34516.2	53182.6	56201.9	46961.7
3-(Carboxymethylamino)propanoic acid		HMDB0033550	281622	NA	NA	5.80809e+06	7.06151e+06	6.62278e+06	5990323	7638704	7.46656e+06	7101270	10406814	7.93689e+06	5.67973e+06	5.66756e+06	6009460	6.16445e+06	5.69839e+06	7310123	11250793	11493082	9309820	8845775	14076279	6796778	6265097	12129724	6.51872e+06	4.82738e+06	7.73812e+06	5.51663e+06	5040238	7986673	5599903	6.00351e+06	5257871	6833903	6684500	6720563	8773508	5.01219e+06	5387662	6.56391e+06	6916141	5.76526e+06	5644493	6105444	8.1353e+06
3-(Hydroxymethyl)-2-heptanone		HMDB0036165	5362561	NA	NA	4954824	5.14197e+06	4.41919e+06	4.82049e+06	5765679	5892011	5.07004e+06	5464260	4797286	3.64796e+06	4.84736e+06	6130662	5.12007e+06	6475661	5.90411e+06	3081296	7.21951e+06	9157299	6169049	7.69341e+06	5.73703e+06	7005724	9996086	5.16342e+06	4.68692e+06	1.93052e+06	3824784	3377617	6.38554e+06	4767635	4082351	9323195	7.81657e+06	11156823	10348903	7223643	7.55598e+06	8117199	11308355	7875526	7821792	9446027	7832668	10037557
3-(Hydroxymethyl)-2-octanone		HMDB0037164	62148	NA	NA	31059080	36333212	35153816	31346394	26063910	34265028	37671056	37614436	32756472	31222842	25990618	35452616	24216608	31566360	49759612	18183924	29314668	36772668	29634554	34388456	37593128	31483394	42794468	35495564	31823804	20526698	28560828	22274504	30226706	26423828	20904814	21439336	16472399	28092744	17140688	14065325	19779730	23878034	20280954	17347108	17172318	22708688	19138784	27444522
3(S)-hydroxy-all-cis-8,11,14,17-eicosatetraenoyl-CoA		HMDB0062202	NA	NA	NA	1540254	1.67919e+06	1.9796e+06	1825421	1.95816e+06	1.82696e+06	1.61079e+06	1.76032e+06	1.97601e+06	1.662e+06	1.72949e+06	1.70587e+06	1.84115e+06	2.77634e+06	1564488	1714890	1.31061e+06	1.01264e+06	1.48834e+06	1075626	1.55374e+06	1.28646e+06	1.225e+06	1.78276e+06	1.41583e+06	2.08046e+06	2179152	1832286	1.87681e+06	1.84927e+06	1.47229e+06	1.51973e+06	2.01794e+06	1.53132e+06	1.44439e+06	1.92226e+06	1.61617e+06	1810911	1.67998e+06	1.90648e+06	1.66314e+06	1.67312e+06	1.5588e+06	1.882e+06
3,4-Dihydro-6-methoxy-2,2-dimethyl-2H-1-benzopyran-4-ol		HMDB0041411	24252761	NA	NA	45176	45628.5	51174	34194	22415.2	39135.1	26801.2	24636.3	51815.2	50444.6	31284.9	41873.3	35140.4	29461.5	47013	20175.3	37899.1	26876.7	29734.7	20121.4	28143	43389.1	50165.4	39652.5	30522.9	30218.9	27476.8	26820.2	48262.9	25679.8	29160.9	62292.7	47120.5	31420	45543.4	82195.1	40295.9	108252	45469.3	33411.6	79106	53372.2	123836	40799.1
3,4-Dihydro-6-methoxy-3,7-dimethyl-1H-2-benzopyran-8-ol		HMDB0035224	50969	NA	NA	45176	45628.5	51174	34194	22415.2	39135.1	26801.2	24636.3	51815.2	50444.6	31284.9	41873.3	35140.4	29461.5	47013	20175.3	37899.1	26876.7	29734.7	20121.4	28143	43389.1	50165.4	39652.5	30522.9	30218.9	27476.8	26820.2	48262.9	25679.8	29160.9	62292.7	47120.5	31420	45543.4	82195.1	40295.9	108252	45469.3	33411.6	79106	53372.2	123836	40799.1
3,4-Dimethyl-1,2-cyclopentanedione		HMDB0037026	61633	NA	NA	44527.8	38993	49939.9	33315.1	36861	39517.2	29847.9	28948.7	34893.1	51301.7	36034.5	31718.3	32598.4	41186	37746.6	26228.5	30983.7	34968.3	28658.7	34442.3	38471.1	31565.1	37294	39566.7	44184.7	29332.1	37357.3	31230.4	31835.1	30813.1	29212.8	46181.9	49299.9	35719.4	54526.2	68550.1	49160.3	56809.8	51342.4	56083.4	55079.3	65128.9	51810.2	46301.8
3,4-Dimethyl-5-pentyl-2-furanheptanoic acid		HMDB0039603	13963863	NA	NA	109803	68765.2	152432	103728	96054.6	105065	184247	175878	152240	131321	111445	172128	165379	151450	127642	155512	119241	140214	114824	115476	180514	167263	118973	137815	118296	326696	181050	88933.3	171286	156978	63798.6	68099.2	46489.8	85053.5	80878.2	80988	69600.5	78959.3	64104.3	49585	127516	62877.4	111900	89391.9
3,4-Dimethylcyclohexanol		HMDB0061912	97960	88852	NA	78455.7	65344.3	83608.7	64943.9	79512.6	59021.4	76686.4	92972.8	74609.5	87474	75396.3	67367.8	63850.3	54698.8	79092.8	38729	47039.2	65392.8	44689	66409.2	63031.6	53986.8	98142.6	87254.1	62420.1	47849	83815.5	49708.2	78847.6	48770.1	41515	62052.1	49549.7	69056.4	60690.3	35418	50869.3	53883.8	58666.7	42025.4	53045.4	79185.9	69060.6	54148.4
3,4-Hexanedione		HMDB0031492	62539	88652	NA	34268.5	41824.2	35106.6	33477.2	26908.6	25498.6	20700.8	25431.6	29058.4	54635.9	36317.1	21701.8	32713	30171.6	25063.2	24736.9	42240.8	34513.8	29363.7	21539.5	41238	27241.5	31996.4	38251.2	27664.1	28445.2	36077.6	29127.1	46560.4	25445.9	30581.6	48619.4	51196.1	43480.4	66593.1	114095	57434.8	130957	79610.3	40931.3	47211.8	52152.9	121125	54604.3
3,4-Methylene suberic acid		HMDB0059768	124202118	89887	NA	26771.8	26920.9	36438.9	27563.2	24175.7	26688.8	24814.6	19594.8	40371.3	37100.1	39233.9	39637.4	29362.7	31115.6	38607.5	16412.3	25980.1	26939.5	32274.7	22367.6	28163.7	35621.6	23877.7	38096.1	19653.9	26501.9	29459.1	21171.9	44009.7	33353.9	20259	25953.2	57428.5	33063.5	35804	39932.4	30209.2	74966.6	29082.6	22442.6	32136	55650.3	64242.3	46928
3,4-Methyleneazelaic acid		HMDB0059744	122517586	89902	NA	41242.9	31439.8	33136.8	27181.7	34523.9	27040.8	43223.8	31727.7	45305.5	49126.2	33384.6	27871.3	35477.9	43303.3	38967.5	21626.1	35005.8	27801.8	27743.9	23083.3	37925.7	23230.4	50400.3	48609	26078.9	21989.5	26043.2	33840.5	24576.1	26475.1	28570.6	45176.4	56968	34204	55021.7	75168.5	38410.9	85463	36820.2	37332.8	85522.1	28538.3	131835	42105.1
3,4-Methylenesebacic acid		HMDB0059729	124202122	89935	NA	69217.1	70419.5	107646	48752.8	36231.2	98440	62805	60927.6	116517	91033.1	56001.8	59902.5	53902.8	88337.4	74312.3	47243.1	54565.5	64141.9	57168.2	41230.7	62245.6	67450.5	82077.9	92270.6	47377.1	51627.3	44674.5	47997.7	119314	55242.9	48437	146837	117769	74667.4	115521	196595	104639	213329	113231	85827.8	149025	76052.8	321632	74675.2
3,5-Bis(1,1-dimethylethyl)-4-hydroxy-benzoic acid ethyl ester		HMDB0061935	75639	88829	NA	74018.4	72595.3	103610	62718.7	50626.1	86227	74400.9	65058.8	99355.5	101946	90604.3	71549.8	64630.7	57262.4	93108.5	46989.9	71203.9	50410.1	55515.8	76938.7	93951.9	65290.4	85085.3	81277.2	57690.7	56928.4	67630.7	63461	101575	87471.4	58538.8	44031.4	50344.6	0	30695.2	55156.9	79439.3	52979	50052.2	45160.1	49688.9	0	62765.2	40675
3,5-Dimethyl-1,2-cyclopentanedione		HMDB0037027	61634	NA	NA	44527.8	38993	49939.9	33315.1	36861	39517.2	29847.9	28948.7	34893.1	51301.7	36034.5	31718.3	32598.4	41186	37746.6	26228.5	30983.7	34968.3	28658.7	34442.3	38471.1	31565.1	37294	39566.7	44184.7	29332.1	37357.3	31230.4	31835.1	30813.1	29212.8	46181.9	49299.9	35719.4	54526.2	68550.1	49160.3	56809.8	51342.4	56083.4	55079.3	65128.9	51810.2	46301.8
3,5-Dimethylcyclohexanol		HMDB0061913	21584	88850	NA	78455.7	65344.3	83608.7	64943.9	79512.6	59021.4	76686.4	92972.8	74609.5	87474	75396.3	67367.8	63850.3	54698.8	79092.8	38729	47039.2	65392.8	44689	66409.2	63031.6	53986.8	98142.6	87254.1	62420.1	47849	83815.5	49708.2	78847.6	48770.1	41515	62052.1	49549.7	69056.4	60690.3	35418	50869.3	53883.8	58666.7	42025.4	53045.4	79185.9	69060.6	54148.4
3,7-Dimethyl-2,6-octadien-1-ylacetate		HMDB0061816	7780	NA	NA	76362.4	90894.3	75547.2	68709.6	61595.6	78885	63850.5	79108	76052.9	78752.7	65333.5	63889.2	66364.3	84609.9	92349.7	44671.4	65743.4	80538.1	56871.4	62028.6	70401.1	53480.2	83910.6	71551.6	58390.6	36650.1	65737.9	57321.8	69636.9	59518	58123.4	29197.2	20682.8	28552	27393	19356.9	29384.6	34331.1	25908.6	27730.2	33053.5	27211.6	33980.7	23951.8
3beta,6beta-Dihydroxynortropane		HMDB0038949	22297531	NA	NA	3115833	2.81607e+06	1.0026e+06	12684520	1.48024e+06	1.09527e+06	1.02375e+06	556079	24854000	18994994	8490336	4.82888e+06	1.554e+06	1.18179e+06	1.08388e+06	664752	8.18615e+06	6008488	520016	4548878	8370944	5.67613e+06	6.32065e+06	13465241	1.76495e+06	1.74581e+06	616211	1.17657e+06	1.61961e+06	1.22914e+06	635859	1.857e+06	22583746	15147661	3478042	2.48722e+06	1.46778e+06	2492482	1.72437e+06	6991240	1.96918e+06	15946266	18911942	14833124
3beta-Dihydroxymarasmene		HMDB0036036	106766	NA	NA	79405.7	77014.7	64615.2	39276.2	49065.4	71669	52334.1	48857.7	65720.5	61057.7	61368.5	54725.2	46640.6	60385.6	62399.3	32300.1	52296	59950.6	39955.8	50356.4	52315.6	48547.6	48548.1	67934.1	40279.2	36668	51899.8	50269.3	52144.6	43672.2	42031.2	41954.3	45226.5	30687.1	34369.8	24898.6	24785	43373.5	26671.4	27065.9	34819.1	37909.8	39824.1	33989.1
3beta-Hydroxycinnamolide		HMDB0039156	14433053	NA	NA	79405.7	77014.7	64615.2	39276.2	49065.4	71669	52334.1	48857.7	65720.5	61057.7	61368.5	54725.2	46640.6	60385.6	62399.3	32300.1	52296	59950.6	39955.8	50356.4	52315.6	48547.6	48548.1	67934.1	40279.2	36668	51899.8	50269.3	52144.6	43672.2	42031.2	41954.3	45226.5	30687.1	34369.8	24898.6	24785	43373.5	26671.4	27065.9	34819.1	37909.8	39824.1	33989.1
3b-Hydroxy-6b-methoxy-7(11)-eremophilen-12,8a-olide		HMDB0040755	131752927	NA	NA	68552.9	65692.4	81926.3	54333.5	61757.8	83041.9	72982.4	66182.8	61046.3	78017.9	78845.5	64957.7	73787.2	74201.5	80271.7	38739.4	62064.7	77781.7	50401.8	97928.7	64149.8	47747.8	69351.8	73578.3	38842.8	40843.1	80844.6	45661.6	86723.7	46119.9	49557.9	39480.4	45738.6	39495	40828.1	39281.1	49086.9	34851.1	38345.3	51467.8	29895.4	38204	39700.8	27877.5
3-Buten-1-ol		HMDB0031324	69389	NA	NA	48236.3	29350.7	33855.1	46118.4	32337.8	28957.8	41997.4	32439.3	37516.7	32582.6	32693	32609.9	43637.7	43428.7	49069.4	35845.1	36444.6	38893.8	29925.8	32008.9	25933.7	43836.3	36810.5	42137.4	28203.8	38745.5	50197.3	31346.9	41080.5	40564.2	41881.7	51791.2	56221.1	64225.4	64085.8	70667.8	52907.6	53664.1	45199.5	55208.6	67477.5	67772.4	53169.3	77638
3-Carbamoyl-2-phenylpropionaldehyde		HMDB0060366	21350391	80586	C16587	6587127	4.16879e+06	6.30587e+06	7792590	4.18358e+06	1.74925e+06	5.40687e+06	3.61735e+06	11999195	11344791	9277816	5.75582e+06	2384798	2.46608e+06	5150483	3.46516e+06	13389025	4.71414e+06	3.93841e+06	4.68055e+06	7.57211e+06	5965610	3.18663e+06	7.46534e+06	2.5519e+06	2.15357e+06	2528101	2.98205e+06	2.38889e+06	5290917	5.17531e+06	4.40393e+06	6.08301e+06	7.02355e+06	4.0611e+06	1.88017e+06	3.30362e+06	2880879	5.28289e+06	3697161	4.27324e+06	8676850	17222070	7.97825e+06
3-Dehydro-L-threonate		METPA0357	NA	16943	C03064	1.1477e+06	814630	1.04021e+06	1.13572e+06	1.39133e+06	1.70645e+06	1.35789e+06	1520693	1.18449e+06	1.01964e+06	1.11704e+06	953884	1.01303e+06	1.90119e+06	1.37121e+06	1.61691e+06	1.10011e+06	1.92322e+06	1.19098e+06	6.7437e+06	2.19677e+06	1.62053e+06	2.97792e+06	1.80551e+06	1.51736e+06	946639	1019497	1.06907e+06	1.90511e+06	1.09838e+06	1.51492e+06	1.28486e+06	912716	1.1859e+06	1.11857e+06	764067	1179725	742611	1.23195e+06	1.16468e+06	1.56927e+06	1.04154e+06	947895	954812
3-Deoxyarabinohexonic acid		HMDB0000346	152990	45626	NA	1540254	1.67919e+06	1.9796e+06	1825421	1.95816e+06	1.82696e+06	1.61079e+06	1.76032e+06	1.97601e+06	1.662e+06	1.72949e+06	1.70587e+06	1.84115e+06	2.77634e+06	1564488	1714890	1.31061e+06	1.01264e+06	1.48834e+06	1075626	1.55374e+06	1.28646e+06	1.225e+06	1.78276e+06	1.41583e+06	2.08046e+06	2179152	1832286	1.87681e+06	1.84927e+06	1.47229e+06	1.51973e+06	2.01794e+06	1.53132e+06	1.44439e+06	1.92226e+06	1.61617e+06	1810911	1.67998e+06	1.90648e+06	1.66314e+06	1.67312e+06	1.5588e+06	1.882e+06
3E-Hexenyl acetate		HMDB0032533	5352557	NA	NA	83695.1	81917.4	77648.2	93430.8	73293.4	78218.4	68261.6	59883.3	90296.4	81380.4	70828.3	77336.6	97751.7	61165.1	67996.6	57721.5	53827.8	67794.3	54063.9	75450.4	74457.6	60976.8	80425.2	78154.1	69819.7	69619.7	68942.2	62732.9	85502.3	69160.2	69030.1	82340.9	77460.4	97448.3	74460.6	78421.1	63975.1	80083.7	69837.5	63781.6	79658	96205.2	84787.9	84959.9
3-Ethenyl-2,5-dimethyl-4-oxohex-5-en-2-yl acetate		HMDB0041573	21630871	NA	NA	129910	200657	136149	143441	110841	106274	124970	122974	172603	139528	177380	116521	141232	166104	150430	114007	126911	121054	112873	147478	135178	104421	127424	161358	133453	116070	120216	132449	130616	158179	106165	86615.2	128697	53984.3	137265	135435	108067	154684	92932.5	66043.6	87558.5	98998.5	163012	58335.4
3-Ethyl-1,2-cyclopentanedione		HMDB0031222	114535	NA	NA	44527.8	38993	49939.9	33315.1	36861	39517.2	29847.9	28948.7	34893.1	51301.7	36034.5	31718.3	32598.4	41186	37746.6	26228.5	30983.7	34968.3	28658.7	34442.3	38471.1	31565.1	37294	39566.7	44184.7	29332.1	37357.3	31230.4	31835.1	30813.1	29212.8	46181.9	49299.9	35719.4	54526.2	68550.1	49160.3	56809.8	51342.4	56083.4	55079.3	65128.9	51810.2	46301.8
3-Heptyl acetate		HMDB0032309	537615	NA	NA	31059080	36333212	35153816	31346394	26063910	34265028	37671056	37614436	32756472	31222842	25990618	35452616	24216608	31566360	49759612	18183924	29314668	36772668	29634554	34388456	37593128	31483394	42794468	35495564	31823804	20526698	28560828	22274504	30226706	26423828	20904814	21439336	16472399	28092744	17140688	14065325	19779730	23878034	20280954	17347108	17172318	22708688	19138784	27444522
3-Hexenyl 2-methylbutyrate		HMDB0032320	6165108	NA	NA	309034	320740	293821	269294	217104	283689	311343	362226	288594	268578	271059	298196	265667	311945	376786	205478	259773	331045	247427	291458	327829	265874	391031	354682	286991	228648	301005	247328	305922	248143	192236	79297.4	74478.3	86984.4	87988.8	61451.4	63170	86007.9	65822.3	57758.6	138894	79557.3	69502.4	59403.4
3-Hydroxy-2-methyl-[R-(R,S)]-butanoic acid		HMDB0000351	12313370	NA	NA	1.107e+06	1.61645e+06	1.25292e+06	1.20826e+06	974962	1.28529e+06	1.18303e+06	1.32551e+06	1.4004e+06	1.38259e+06	1.54977e+06	1.08015e+06	1.37746e+06	1.63471e+06	1.40794e+06	1.14858e+06	2.27983e+06	1.44593e+06	991529	949075	3.1254e+06	3.34185e+06	1.50857e+06	1644150	1.7157e+06	2.53997e+06	901580	1.2353e+06	1.54439e+06	1.19634e+06	2.19382e+06	1.40347e+06	1.29212e+06	1.29809e+06	860963	985831	831446	1.11999e+06	709748	1.28068e+06	1.98068e+06	1.29784e+06	1.02892e+06	835987
3-Hydroxy-2-methyl-[S-(R,R)]-butanoic acid		HMDB0000410	12313369	NA	NA	1.107e+06	1.61645e+06	1.25292e+06	1.20826e+06	974962	1.28529e+06	1.18303e+06	1.32551e+06	1.4004e+06	1.38259e+06	1.54977e+06	1.08015e+06	1.37746e+06	1.63471e+06	1.40794e+06	1.14858e+06	2.27983e+06	1.44593e+06	991529	949075	3.1254e+06	3.34185e+06	1.50857e+06	1644150	1.7157e+06	2.53997e+06	901580	1.2353e+06	1.54439e+06	1.19634e+06	2.19382e+06	1.40347e+06	1.29212e+06	1.29809e+06	860963	985831	831446	1.11999e+06	709748	1.28068e+06	1.98068e+06	1.29784e+06	1.02892e+06	835987
3-Hydroxy-4-phenylbutan-2-one		HMDB0032336	6428929	NA	NA	319857	360362	339209	294864	228467	318225	320920	294556	366724	307306	281947	314430	291533	318799	391287	246331	823553	543953	325456	761641	329494	277535	871394	326916	267529	187581	292959	203942	315391	243716	205839	82776.2	110117	97077.6	225574	51406.6	43058.9	110897	113319	57713.3	64605.6	159978	94811.4	64758.7
3-Hydroxy-6,8-dimethoxy-7(11)-eremophilen-12,8-olide		HMDB0040756	85094081	143054	NA	176348	205073	161505	131209	125959	139746	134659	175234	135981	159299	158632	143166	139234	188282	242427	134476	156459	186728	154629	134024	177965	131500	195479	196752	150802	196452	204972	132813	157488	172216	172284	0	22033.7	0	30297.7	0	0	0	73554.2	0	36444	60129.9	0	0
3-Hydroxybutan-2-one		HMDB0003243	4068	15688	C00466	1.81681e+06	3.93966e+06	3.59409e+06	2.58079e+06	5230106	3.68656e+06	3.15884e+06	8167922	4.58022e+06	1954573	2.92624e+06	4.00314e+06	3389748	3132904	2582963	9731120	10018303	5151012	6330369	3845188	2.88542e+06	4.81403e+06	6.51737e+06	4.97457e+06	3.19513e+06	1.70177e+06	1.55845e+06	1.46756e+06	3.25844e+06	3548256	4.26544e+06	2.62526e+06	1.84804e+06	2.4178e+06	4.01632e+06	1.97717e+06	1.1697e+06	2.51153e+06	2.17896e+06	2.37436e+06	2.21259e+06	4.11471e+06	3.60204e+06	1.77517e+06
3-Hydroxydodecanoic acid		HMDB0000387	5312805	36210	NA	93195.1	70059.2	90351.2	55260.4	39805.1	79059.1	72820.3	71983.4	62780.9	62902.1	61566.8	48850	50245.8	71971.6	69329.9	40435.3	46461.5	49150.6	38708.7	64455.2	89879.1	56378.5	68407.7	77648.5	53062.6	70407.2	96938.9	40269.1	82614.2	63918.4	45182.3	43745.3	38151	43683	40658.5	29759.7	44096.8	56325.2	39756.2	28657.5	75603.7	43732.1	42756.5	32214.2
3-hydroxyheptanoic acid		HMDB0061653	3083220	132838	NA	178947	202640	177959	176880	112816	173479	219725	161563	273277	189127	228650	213593	210229	253332	274963	144766	244540	305105	161519	164374	199030	155352	294460	262924	137640	124669	141467	154233	156235	127113	184856	169043	156628	223479	188211	157163	138707	215150	175326	123081	144756	155229	166353	204260
3-Hydroxyisoheptanoic acid		HMDB0002207	193804	NA	NA	178947	202640	177959	176880	112816	173479	219725	161563	273277	189127	228650	213593	210229	253332	274963	144766	244540	305105	161519	164374	199030	155352	294460	262924	137640	124669	141467	154233	156235	127113	184856	169043	156628	223479	188211	157163	138707	215150	175326	123081	144756	155229	166353	204260
3-Hydroxyisovaleric acid		HMDB0000754	69362	37084	C20827	1.107e+06	1.61645e+06	1.25292e+06	1.20826e+06	974962	1.28529e+06	1.18303e+06	1.32551e+06	1.4004e+06	1.38259e+06	1.54977e+06	1.08015e+06	1.37746e+06	1.63471e+06	1.40794e+06	1.14858e+06	2.27983e+06	1.44593e+06	991529	949075	3.1254e+06	3.34185e+06	1.50857e+06	1644150	1.7157e+06	2.53997e+06	901580	1.2353e+06	1.54439e+06	1.19634e+06	2.19382e+06	1.40347e+06	1.29212e+06	1.29809e+06	860963	985831	831446	1.11999e+06	709748	1.28068e+06	1.98068e+06	1.29784e+06	1.02892e+06	835987
3-Hydroxyoctan-2-one		HMDB0032335	6428543	NA	NA	4954824	5.14197e+06	4.41919e+06	4.82049e+06	5765679	5892011	5.07004e+06	5464260	4797286	3.64796e+06	4.84736e+06	6130662	5.12007e+06	6475661	5.90411e+06	3081296	7.21951e+06	9157299	6169049	7.69341e+06	5.73703e+06	7005724	9996086	5.16342e+06	4.68692e+06	1.93052e+06	3824784	3377617	6.38554e+06	4767635	4082351	9323195	7.81657e+06	11156823	10348903	7223643	7.55598e+06	8117199	11308355	7875526	7821792	9446027	7832668	10037557
3-Hydroxy-p-mentha-1,8-dien-7-al		HMDB0041584	85247137	NA	NA	125608	137869	162940	113897	69438.4	111236	117134	113408	198233	166327	113129	95501.3	111009	147315	107696	60184.6	127233	122066	126081	85493.6	102991	85812.9	142585	174777	76043.9	70660.7	81507.4	79837	108682	119309	97758.3	119131	165126	126387	117883	174560	128250	242214	153779	147094	177844	156160	190980	161819
3-Hydroxypropanoate		HMDB0000700	68152	33404	C01013	34604040	32366062	29686998	28032482	33920504	37309564	37693416	62224104	26912984	29790164	39323216	35144460	36549092	78211616	48374172	64851360	47586364	55510288	47541176	95735264	40326796	34245000	88165760	37155892	33809576	42927720	39803268	31499218	40889440	28879110	28979262	36533772	24347202	30594836	27474300	36138668	28200484	18962858	24667236	19444306	50020192	24658152	19440104	25157594
3-Hydroxytrichothecene		HMDB0035760	13857027	NA	NA	79405.7	77014.7	64615.2	39276.2	49065.4	71669	52334.1	48857.7	65720.5	61057.7	61368.5	54725.2	46640.6	60385.6	62399.3	32300.1	52296	59950.6	39955.8	50356.4	52315.6	48547.6	48548.1	67934.1	40279.2	36668	51899.8	50269.3	52144.6	43672.2	42031.2	41954.3	45226.5	30687.1	34369.8	24898.6	24785	43373.5	26671.4	27065.9	34819.1	37909.8	39824.1	33989.1
3-Ketoapotrichothecene		HMDB0036550	14408092	143041	NA	79405.7	77014.7	64615.2	39276.2	49065.4	71669	52334.1	48857.7	65720.5	61057.7	61368.5	54725.2	46640.6	60385.6	62399.3	32300.1	52296	59950.6	39955.8	50356.4	52315.6	48547.6	48548.1	67934.1	40279.2	36668	51899.8	50269.3	52144.6	43672.2	42031.2	41954.3	45226.5	30687.1	34369.8	24898.6	24785	43373.5	26671.4	27065.9	34819.1	37909.8	39824.1	33989.1
3-keto-n-caprylic acid		HMDB0010721	128859	44680	NA	725537	909899	730622	661799	538843	590477	709836	769860	872325	735692	576060	751613	629733	809478	873124	356186	678111	785050	609766	585886	755381	538295	714600	879770	470162	443530	632329	476894	687153	645897	543934	629235	455056	444668	450805	589883	435334	799372	417877	411818	597636	414990	858311	421107
3-Methoxybenzaldehyde		HMDB0031459	11569	136805	NA	68708.7	43528.7	48824.3	60176.8	52616.3	44124.8	56966.1	53439.2	87107.1	48783.8	38835.6	67959.7	41229.5	70931.5	102748	35358.7	59270.8	75816.7	48448.1	51040.8	47556.7	48478.1	70897.2	80392.3	44660.4	42313.2	64034.5	50219.4	82217.8	60804.1	53950.5	44770.6	35554.1	42831.3	32625.2	34227.4	42066.8	40043.4	40433.9	37215.5	34516.2	53182.6	56201.9	46961.7
3-Methyl-1,2-cyclohexanedione		HMDB0034080	3321360	NA	NA	44527.8	38993	49939.9	33315.1	36861	39517.2	29847.9	28948.7	34893.1	51301.7	36034.5	31718.3	32598.4	41186	37746.6	26228.5	30983.7	34968.3	28658.7	34442.3	38471.1	31565.1	37294	39566.7	44184.7	29332.1	37357.3	31230.4	31835.1	30813.1	29212.8	46181.9	49299.9	35719.4	54526.2	68550.1	49160.3	56809.8	51342.4	56083.4	55079.3	65128.9	51810.2	46301.8
3-Methyl-1-penten-3-ol		HMDB0061882	13519	88375	NA	68246.8	83025.3	90228.6	82355.9	60371	52449.1	65304.2	57858.9	73487.2	61006.2	63588.6	72858.2	68669.2	66007.4	80947.1	43598.9	51475	60406.7	59755.3	74676.6	64620.4	56799.2	82646.3	83299.2	57985.2	33929.2	55306.2	56844.3	73361	64224.9	68825.9	47325.6	47134.3	59048.8	58439	46417.4	50584.9	58185.1	45011.6	42323.3	47624.8	60008.5	61950.2	49526.8
3-Methyl-2,4-nonanedione		HMDB0034880	529481	NA	NA	403094	487353	495635	440662	329030	444513	463203	477301	503970	457144	413035	485976	370373	462660	608536	244537	382065	482415	408085	507728	526754	430094	599832	514565	407043	323168	416666	333202	431254	339426	338844	164164	125509	173980	161805	126286	154237	207961	131391	130946	231210	181746	183962	171513
3-Methyl-2-cyclohexen-1-one		HMDB0031541	14511	NA	NA	97984.1	124415	119364	98293.8	113318	108631	113201	89487.2	121505	90633.1	109946	81038.3	92123.7	137093	112446	67344.8	102485	124800	124744	93317.6	99796	97648.3	110335	168241	76394.9	71351.9	83395.9	90177.3	93822.7	98361.7	139903	110328	89751.9	45925.4	52817.1	123299	76061.2	70716.6	84523.9	72564	103595	58479.4	68695.9	51274.6
3-Methyl-3-buten-2-one		HMDB0031530	13143	NA	NA	75519.4	80879.1	67980.6	87867.8	61007.5	61489.5	61430	56223.3	56604.2	78104.3	68954.1	84552.6	59839.8	86573.8	71819.4	65029.5	58213.9	54010.2	68718.4	39045.8	79992.7	58417.2	128319	51115	76859.9	69534.4	84998.8	61067.6	71433.4	76576.7	70756.6	80120.5	64817.1	60440.7	51578.2	55921.9	74286.1	89296.9	38499.3	46812.9	45178.3	56000.1	72622	54148.8
3-Methyl-3-hepten-2-one		HMDB0031590	5364798	NA	NA	69843.6	78615.2	63940	66103.5	62192.9	55711	65202.7	80624	91736.6	102287	50228.8	65130.9	58881.1	62038.8	69958.4	29119.2	39570	55943.8	39152.8	67235.7	53858	44080.1	80048	64278.9	39105.8	43593.3	87947.1	53212.1	54701.4	51159.3	48326.9	56044.6	31629.5	61795.2	44705.4	41984	42903.3	57068.2	53858.8	30655.1	31250.8	62713.1	64284.5	50033.9
3-Methyl-alpha-ionyl acetate		HMDB0037631	6437467	138772	NA	57686.3	42243	55680.2	64115.4	42503.2	48020.7	54456.1	49915.8	39639.3	60338.1	44077.1	57743.2	72149.4	55273.9	49064	37872.8	46149.4	67021.4	45292.4	49797.5	59586.7	47713.2	75207	67767.6	44484.4	78105.1	53304.5	40708.8	73095.9	47636.5	41799.9	34086.3	42438.1	59635.5	27559.1	40490.9	39147.1	40195.3	33113.7	35500.3	62696.6	44071.9	70802.5	28407.8
3-Methylazelaic acid		HMDB0059754	22450170	89889	NA	173498	164447	161661	128535	111052	103185	140700	136218	163703	131437	198614	167383	124118	145176	182277	80296.6	147206	144879	127018	148255	198248	117622	169483	143889	112854	85446.8	141604	129902	143257	136174	109569	131737	165731	228627	154641	144871	136930	213798	170355	193055	207393	257604	170982	249689
3-Methylbutyl 2-methylbutanoate		HMDB0040157	520326	NA	NA	9949007	11504798	11419062	9327990	7611035	10557322	12258934	11924596	11121203	10087879	8976714	11839756	8963184	10683619	14898223	6.08635e+06	9378611	12510601	10533930	10980307	12879971	9452784	13969028	11505806	9738459	7.43292e+06	9378756	7251482	9339049	8226159	6.97687e+06	2.77864e+06	3.51156e+06	5.40678e+06	3.36879e+06	2.54327e+06	3.71239e+06	5.53706e+06	3.01635e+06	2.83467e+06	3.79552e+06	4814188	3.59266e+06	5.48434e+06
3-Methylbutyl 2-methylpropionate		HMDB0036234	519786	87537	NA	31059080	36333212	35153816	31346394	26063910	34265028	37671056	37614436	32756472	31222842	25990618	35452616	24216608	31566360	49759612	18183924	29314668	36772668	29634554	34388456	37593128	31483394	42794468	35495564	31823804	20526698	28560828	22274504	30226706	26423828	20904814	21439336	16472399	28092744	17140688	14065325	19779730	23878034	20280954	17347108	17172318	22708688	19138784	27444522
3-Methylbutyl 2-oxopropanoate		HMDB0038305	537682	NA	NA	725537	909899	730622	661799	538843	590477	709836	769860	872325	735692	576060	751613	629733	809478	873124	356186	678111	785050	609766	585886	755381	538295	714600	879770	470162	443530	632329	476894	687153	645897	543934	629235	455056	444668	450805	589883	435334	799372	417877	411818	597636	414990	858311	421107
3-Methylbutyl 3-oxobutanoate		HMDB0036396	61296	NA	NA	1.10711e+06	1.31182e+06	1.11279e+06	1.0609e+06	708269	1.0635e+06	1.11293e+06	948679	1.34083e+06	1088378	1344857	1.07417e+06	975406	1193672	1.47277e+06	915421	799650	1.07559e+06	1.04515e+06	998577	1.14729e+06	1093040	1683246	1.22389e+06	826318	878308	1.16112e+06	990792	1.11744e+06	898486	894253	701173	398265	415068	533082	456364	548269	788674	363725	311804	545263	401831	661026	358165
3-Methylbutyl butyrate		HMDB0040221	7795	87422	NA	31059080	36333212	35153816	31346394	26063910	34265028	37671056	37614436	32756472	31222842	25990618	35452616	24216608	31566360	49759612	18183924	29314668	36772668	29634554	34388456	37593128	31483394	42794468	35495564	31823804	20526698	28560828	22274504	30226706	26423828	20904814	21439336	16472399	28092744	17140688	14065325	19779730	23878034	20280954	17347108	17172318	22708688	19138784	27444522
3-Methylbutyl hexanoate		HMDB0033618	16617	87542	NA	1.69237e+06	2.03593e+06	1.91863e+06	1.48279e+06	1.27121e+06	1.57707e+06	2.09075e+06	1.89838e+06	1.92771e+06	1.75543e+06	1.51771e+06	1.82407e+06	1.44055e+06	1.84583e+06	2.4127e+06	1.11724e+06	1521156	2.04302e+06	1609977	1.77459e+06	2.2223e+06	1.56491e+06	2.2154e+06	1.98399e+06	1.73029e+06	1.23412e+06	1.65599e+06	1.2052e+06	1.69875e+06	1.35488e+06	1.21874e+06	298319	420139	511203	302649	268375	350309	670715	291895	289214	395764	515219	399649	605233
3-Methylbutyl pentanoate		HMDB0040529	74901	NA	NA	9949007	11504798	11419062	9327990	7611035	10557322	12258934	11924596	11121203	10087879	8976714	11839756	8963184	10683619	14898223	6.08635e+06	9378611	12510601	10533930	10980307	12879971	9452784	13969028	11505806	9738459	7.43292e+06	9378756	7251482	9339049	8226159	6.97687e+06	2.77864e+06	3.51156e+06	5.40678e+06	3.36879e+06	2.54327e+06	3.71239e+06	5.53706e+06	3.01635e+06	2.83467e+06	3.79552e+06	4814188	3.59266e+06	5.48434e+06
3-Methylbutyl propanoate		HMDB0034164	7772	87419	NA	4954824	5.14197e+06	4.41919e+06	4.82049e+06	5765679	5892011	5.07004e+06	5464260	4797286	3.64796e+06	4.84736e+06	6130662	5.12007e+06	6475661	5.90411e+06	3081296	7.21951e+06	9157299	6169049	7.69341e+06	5.73703e+06	7005724	9996086	5.16342e+06	4.68692e+06	1.93052e+06	3824784	3377617	6.38554e+06	4767635	4082351	9323195	7.81657e+06	11156823	10348903	7223643	7.55598e+06	8117199	11308355	7875526	7821792	9446027	7832668	10037557
3-methylmalate(2-)		HMDB0062739	558882	25312	NA	565769	769254	724870	466766	872627	891142	717712	1.09402e+06	542823	488448	611947	635900	760856	695620	789646	1.31487e+06	1.36864e+06	1309284	927179	1.62181e+06	1.00036e+06	800706	931377	778597	734617	597023	688524	597968	922982	847934	832112	686481	517598	505763	849670	590742	470937	511805	768763	653276	708175	448122	450988	660151
3-Methylsuberic acid		HMDB0059783	12346696	NA	NA	294161	292649	362573	312789	276612	353848	272464	259481	393119	293483	319734	351261	262288	349839	349010	166447	311050	322700	255503	271450	308555	225864	365407	437670	201540	246329	290636	247008	347563	270861	236362	197998	171490	187606	135506	174254	170424	241181	161755	196161	279967	248208	281390	219395
3-Octen-2-one		HMDB0033547	5363229	NA	NA	69843.6	78615.2	63940	66103.5	62192.9	55711	65202.7	80624	91736.6	102287	50228.8	65130.9	58881.1	62038.8	69958.4	29119.2	39570	55943.8	39152.8	67235.7	53858	44080.1	80048	64278.9	39105.8	43593.3	87947.1	53212.1	54701.4	51159.3	48326.9	56044.6	31629.5	61795.2	44705.4	41984	42903.3	57068.2	53858.8	30655.1	31250.8	62713.1	64284.5	50033.9
3-Octyl formate		HMDB0032454	22757845	NA	NA	31059080	36333212	35153816	31346394	26063910	34265028	37671056	37614436	32756472	31222842	25990618	35452616	24216608	31566360	49759612	18183924	29314668	36772668	29634554	34388456	37593128	31483394	42794468	35495564	31823804	20526698	28560828	22274504	30226706	26423828	20904814	21439336	16472399	28092744	17140688	14065325	19779730	23878034	20280954	17347108	17172318	22708688	19138784	27444522
3-Oxoglutaric acid		HMDB0013701	68328	NA	NA	565769	769254	724870	466766	872627	891142	717712	1.09402e+06	542823	488448	611947	635900	760856	695620	789646	1.31487e+06	1.36864e+06	1309284	927179	1.62181e+06	1.00036e+06	800706	931377	778597	734617	597023	688524	597968	922982	847934	832112	686481	517598	505763	849670	590742	470937	511805	768763	653276	708175	448122	450988	660151
3-Oxovalproic acid		HMDB0060685	173719	80638	C16652	725537	909899	730622	661799	538843	590477	709836	769860	872325	735692	576060	751613	629733	809478	873124	356186	678111	785050	609766	585886	755381	538295	714600	879770	470162	443530	632329	476894	687153	645897	543934	629235	455056	444668	450805	589883	435334	799372	417877	411818	597636	414990	858311	421107
3-Phenylbutyric acid		HMDB0001955	20724	NA	NA	319857	360362	339209	294864	228467	318225	320920	294556	366724	307306	281947	314430	291533	318799	391287	246331	823553	543953	325456	761641	329494	277535	871394	326916	267529	187581	292959	203942	315391	243716	205839	82776.2	110117	97077.6	225574	51406.6	43058.9	110897	113319	57713.3	64605.6	159978	94811.4	64758.7
3-Phenylpropyl formate		HMDB0034471	61010	NA	NA	319857	360362	339209	294864	228467	318225	320920	294556	366724	307306	281947	314430	291533	318799	391287	246331	823553	543953	325456	761641	329494	277535	871394	326916	267529	187581	292959	203942	315391	243716	205839	82776.2	110117	97077.6	225574	51406.6	43058.9	110897	113319	57713.3	64605.6	159978	94811.4	64758.7
3R-hydroxy-dodecanoic acid		HMDB0010728	5312804	43197	NA	93195.1	70059.2	90351.2	55260.4	39805.1	79059.1	72820.3	71983.4	62780.9	62902.1	61566.8	48850	50245.8	71971.6	69329.9	40435.3	46461.5	49150.6	38708.7	64455.2	89879.1	56378.5	68407.7	77648.5	53062.6	70407.2	96938.9	40269.1	82614.2	63918.4	45182.3	43745.3	38151	43683	40658.5	29759.7	44096.8	56325.2	39756.2	28657.5	75603.7	43732.1	42756.5	32214.2
3R-hydroxy-hexanoic acid		HMDB0010718	10197713	NA	NA	325808	397432	341500	309214	236865	242158	333978	275568	467726	339154	344064	309472	264954	371445	366957	203836	334007	327211	252096	272780	307163	293697	376911	401865	202274	237681	257716	213396	309933	338272	241916	120140	114052	122455	107787	123662	93379.2	107378	98495.5	152286	166687	134491	124153	123728
3S-hydroxy-dodecanoic acid		HMDB10728	5312805	36210	NA	93195.1	70059.2	90351.2	55260.4	39805.1	79059.1	72820.3	71983.4	62780.9	62902.1	61566.8	48850	50245.8	71971.6	69329.9	40435.3	46461.5	49150.6	38708.7	64455.2	89879.1	56378.5	68407.7	77648.5	53062.6	70407.2	96938.9	40269.1	82614.2	63918.4	45182.3	43745.3	38151	43683	40658.5	29759.7	44096.8	56325.2	39756.2	28657.5	75603.7	43732.1	42756.5	32214.2
3-Ureidoisobutyrate		HMDB0002031	88558720	1670	C05100	55257060	53648564	53929864	78011128	51703016	72669704	59772820	62329452	55746040	59579548	51811356	69629464	76732384	65521884	60568116	63454836	46855756	54225856	67569288	50618444	45576736	47444200	49263852	78622064	62380264	71422112	67128024	79004896	60695680	47414028	65589332	71586784	62982020	49129308	46691176	44611148	52194284	42311788	56477280	56484144	58263440	46946964	56083036	57669604
3-Vinylcatechol		METPA0896	NA	NA	C07085	68708.7	43528.7	48824.3	60176.8	52616.3	44124.8	56966.1	53439.2	87107.1	48783.8	38835.6	67959.7	41229.5	70931.5	102748	35358.7	59270.8	75816.7	48448.1	51040.8	47556.7	48478.1	70897.2	80392.3	44660.4	42313.2	64034.5	50219.4	82217.8	60804.1	53950.5	44770.6	35554.1	42831.3	32625.2	34227.4	42066.8	40043.4	40433.9	37215.5	34516.2	53182.6	56201.9	46961.7
3Z-Hexenyl acetate		HMDB0040215	5363388	61316	C19757	83695.1	81917.4	77648.2	93430.8	73293.4	78218.4	68261.6	59883.3	90296.4	81380.4	70828.3	77336.6	97751.7	61165.1	67996.6	57721.5	53827.8	67794.3	54063.9	75450.4	74457.6	60976.8	80425.2	78154.1	69819.7	69619.7	68942.2	62732.9	85502.3	69160.2	69030.1	82340.9	77460.4	97448.3	74460.6	78421.1	63975.1	80083.7	69837.5	63781.6	79658	96205.2	84787.9	84959.9
3Z-Hexenyl isobutyrate		HMDB0040213	5352539	NA	NA	403094	487353	495635	440662	329030	444513	463203	477301	503970	457144	413035	485976	370373	462660	608536	244537	382065	482415	408085	507728	526754	430094	599832	514565	407043	323168	416666	333202	431254	339426	338844	164164	125509	173980	161805	126286	154237	207961	131391	130946	231210	181746	183962	171513
4-(2-Furanyl)-3-buten-2-one		HMDB0033128	1549522	NA	NA	68708.7	43528.7	48824.3	60176.8	52616.3	44124.8	56966.1	53439.2	87107.1	48783.8	38835.6	67959.7	41229.5	70931.5	102748	35358.7	59270.8	75816.7	48448.1	51040.8	47556.7	48478.1	70897.2	80392.3	44660.4	42313.2	64034.5	50219.4	82217.8	60804.1	53950.5	44770.6	35554.1	42831.3	32625.2	34227.4	42066.8	40043.4	40433.9	37215.5	34516.2	53182.6	56201.9	46961.7
4-(4-Hydroxyphenyl)-2-butanone		HMDB0033723	21648	68656	NA	319857	360362	339209	294864	228467	318225	320920	294556	366724	307306	281947	314430	291533	318799	391287	246331	823553	543953	325456	761641	329494	277535	871394	326916	267529	187581	292959	203942	315391	243716	205839	82776.2	110117	97077.6	225574	51406.6	43058.9	110897	113319	57713.3	64605.6	159978	94811.4	64758.7
4-(Butoxymethyl)-2-methoxyphenol		HMDB0037642	5084146	NA	NA	129910	200657	136149	143441	110841	106274	124970	122974	172603	139528	177380	116521	141232	166104	150430	114007	126911	121054	112873	147478	135178	104421	127424	161358	133453	116070	120216	132449	130616	158179	106165	86615.2	128697	53984.3	137265	135435	108067	154684	92932.5	66043.6	87558.5	98998.5	163012	58335.4
4-(Ethoxymethyl)-2-methoxyphenol		HMDB0037641	61586	NA	NA	115416	144676	117828	104242	72557.4	95585.6	98858.4	106646	173135	127044	115271	98442.7	116451	123768	114062	95435.7	103775	105280	104626	92420.2	115607	107699	125763	130080	103867	97847.6	106182	104907	128308	110472	101730	139555	249063	102972	151890	196520	177543	188691	128255	167549	180954	140185	129642	146301
4,4-Dimethoxy-2-butanone		HMDB0033851	228548	NA	NA	325808	397432	341500	309214	236865	242158	333978	275568	467726	339154	344064	309472	264954	371445	366957	203836	334007	327211	252096	272780	307163	293697	376911	401865	202274	237681	257716	213396	309933	338272	241916	120140	114052	122455	107787	123662	93379.2	107378	98495.5	152286	166687	134491	124153	123728
4,5-Dihydrovomifoliol		HMDB0040615	23136584	138758	NA	222412	227728	195753	200625	155495	156094	174321	194187	242098	195163	199292	187099	218183	314651	217857	122468	189644	217160	160240	222896	185226	180942	235185	240435	158089	113679	203092	186594	206150	198779	164319	83031.1	113625	65722.5	80269.8	132257	76574.8	127053	63536	55396	89239.4	82964.2	87086.3	64626.7
4,5-Dimethyl-2-pentyloxazole		HMDB0037887	525787	NA	NA	22173.6	28588.2	36088.1	41721.1	26083	28621.8	35929.6	26325.3	44398.4	28047.7	57709	21199.7	32568.1	47395.6	47178.1	37037.6	39350.5	31557.2	43501.5	30107	29905.2	31201.5	40489.9	59699.5	27541.5	36362.4	20835.3	36348.1	36513.3	41101.9	62423.3	26936.2	28482.5	38131.6	18079.7	19509.9	22518	19080.5	29764.5	22112.7	20566.2	23980.3	32286.2	18213.7
4,8,12,15-Octadecatetraenoic acid		HMDB0032672	131751278	NA	NA	68029.5	56685.5	83613	62422.6	54161.3	77995.1	71818.2	67650.1	61443.4	54447.4	63161	79604.1	78711.9	67863.5	72375.7	59657.3	69928.1	75208.9	58670.3	96465.3	70390.8	89965.6	108794	102279	40698.4	115174	82173.8	50248.8	69725.4	74771.1	57119.8	43977.6	53785.6	80043.4	32389.3	50028.1	40109.9	61678.4	42807.7	35329.6	84726.8	39409.2	71865.1	45519.9
4,8-dimethyl-nonanoic acid		HMDB0002373	13628864	63864	NA	1.69237e+06	2.03593e+06	1.91863e+06	1.48279e+06	1.27121e+06	1.57707e+06	2.09075e+06	1.89838e+06	1.92771e+06	1.75543e+06	1.51771e+06	1.82407e+06	1.44055e+06	1.84583e+06	2.4127e+06	1.11724e+06	1521156	2.04302e+06	1609977	1.77459e+06	2.2223e+06	1.56491e+06	2.2154e+06	1.98399e+06	1.73029e+06	1.23412e+06	1.65599e+06	1.2052e+06	1.69875e+06	1.35488e+06	1.21874e+06	298319	420139	511203	302649	268375	350309	670715	291895	289214	395764	515219	399649	605233
4-Amino-1-piperidinecarboxylic acid		HMDB0060385	445262	NA	C16837	212166	78731.5	121172	122140	89956.4	200060	136945	85040.4	91227.1	209154	110480	143643	95818.3	214897	101061	93814.4	88322.9	251171	109156	169501	153881	102456	190274	118730	87526.9	102256	166827	156694	218338	126549	85045.1	117648	359445	230734	452128	402622	231540	516564	267627	228085	519096	512100	268210	451624
4-Anilino-4-oxobutanoic acid		HMDB0060758	7598	NA	NA	6587127	4.16879e+06	6.30587e+06	7792590	4.18358e+06	1.74925e+06	5.40687e+06	3.61735e+06	11999195	11344791	9277816	5.75582e+06	2384798	2.46608e+06	5150483	3.46516e+06	13389025	4.71414e+06	3.93841e+06	4.68055e+06	7.57211e+06	5965610	3.18663e+06	7.46534e+06	2.5519e+06	2.15357e+06	2528101	2.98205e+06	2.38889e+06	5290917	5.17531e+06	4.40393e+06	6.08301e+06	7.02355e+06	4.0611e+06	1.88017e+06	3.30362e+06	2880879	5.28289e+06	3697161	4.27324e+06	8676850	17222070	7.97825e+06
4-Butyl-2-ethyl-5-methyloxazole		HMDB0037888	86113205	NA	NA	22173.6	28588.2	36088.1	41721.1	26083	28621.8	35929.6	26325.3	44398.4	28047.7	57709	21199.7	32568.1	47395.6	47178.1	37037.6	39350.5	31557.2	43501.5	30107	29905.2	31201.5	40489.9	59699.5	27541.5	36362.4	20835.3	36348.1	36513.3	41101.9	62423.3	26936.2	28482.5	38131.6	18079.7	19509.9	22518	19080.5	29764.5	22112.7	20566.2	23980.3	32286.2	18213.7
4-ene-Valproic acid		HMDB0013897	104896	410867	C16648	83695.1	81917.4	77648.2	93430.8	73293.4	78218.4	68261.6	59883.3	90296.4	81380.4	70828.3	77336.6	97751.7	61165.1	67996.6	57721.5	53827.8	67794.3	54063.9	75450.4	74457.6	60976.8	80425.2	78154.1	69819.7	69619.7	68942.2	62732.9	85502.3	69160.2	69030.1	82340.9	77460.4	97448.3	74460.6	78421.1	63975.1	80083.7	69837.5	63781.6	79658	96205.2	84787.9	84959.9
4-Ethyl-1,2-dimethoxybenzene		HMDB0040176	79990	NA	NA	125608	137869	162940	113897	69438.4	111236	117134	113408	198233	166327	113129	95501.3	111009	147315	107696	60184.6	127233	122066	126081	85493.6	102991	85812.9	142585	174777	76043.9	70660.7	81507.4	79837	108682	119309	97758.3	119131	165126	126387	117883	174560	128250	242214	153779	147094	177844	156160	190980	161819
4-Ethyl-2,6-dimethoxyphenol		HMDB0033394	61712	NA	NA	115416	144676	117828	104242	72557.4	95585.6	98858.4	106646	173135	127044	115271	98442.7	116451	123768	114062	95435.7	103775	105280	104626	92420.2	115607	107699	125763	130080	103867	97847.6	106182	104907	128308	110472	101730	139555	249063	102972	151890	196520	177543	188691	128255	167549	180954	140185	129642	146301
4-Ethyl-2-methyloxazole		HMDB0037838	525785	NA	NA	115103	130366	97723	97635.9	111172	126286	62059.4	79497.4	121732	105891	106295	112470	103019	114550	82833.3	94169.4	121909	87640.8	75014.7	102994	84054.2	106682	83274.2	111011	96818.4	90942.4	81423.1	89552.9	120609	106551	126897	148684	117718	141509	149991	131721	159041	190374	166110	148949	166086	171075	197129	148022
4-Ethyl-5-methyl-2-pentyloxazol		HMDB0037897	86025811	NA	NA	55691.6	50090.5	59847.1	56345.2	32780.5	42912.7	71514.6	63176.4	57799.3	35530.9	118111	57174.5	38775	45702.3	108898	57400.1	53446.2	39112	60662.1	28769.4	34440.9	51182.5	122514	76868.9	35260.8	32087.9	36011.5	60429.4	85942.1	57421	26340.4	37942.1	27758.1	29898.3	32087.2	27690.3	38878.2	41120.3	30023.6	35142.8	46570.8	31356.8	46030.3	28148.6
4-Ethyl-5-pentyloxazole		HMDB0037864	54303054	NA	NA	22173.6	28588.2	36088.1	41721.1	26083	28621.8	35929.6	26325.3	44398.4	28047.7	57709	21199.7	32568.1	47395.6	47178.1	37037.6	39350.5	31557.2	43501.5	30107	29905.2	31201.5	40489.9	59699.5	27541.5	36362.4	20835.3	36348.1	36513.3	41101.9	62423.3	26936.2	28482.5	38131.6	18079.7	19509.9	22518	19080.5	29764.5	22112.7	20566.2	23980.3	32286.2	18213.7
4-Ethyloctanoic acid		HMDB0036136	61840	NA	NA	9949007	11504798	11419062	9327990	7611035	10557322	12258934	11924596	11121203	10087879	8976714	11839756	8963184	10683619	14898223	6.08635e+06	9378611	12510601	10533930	10980307	12879971	9452784	13969028	11505806	9738459	7.43292e+06	9378756	7251482	9339049	8226159	6.97687e+06	2.77864e+06	3.51156e+06	5.40678e+06	3.36879e+06	2.54327e+06	3.71239e+06	5.53706e+06	3.01635e+06	2.83467e+06	3.79552e+06	4814188	3.59266e+06	5.48434e+06
4-Hexyl-2,5-dimethyloxazole		HMDB0037890	573845	NA	NA	55691.6	50090.5	59847.1	56345.2	32780.5	42912.7	71514.6	63176.4	57799.3	35530.9	118111	57174.5	38775	45702.3	108898	57400.1	53446.2	39112	60662.1	28769.4	34440.9	51182.5	122514	76868.9	35260.8	32087.9	36011.5	60429.4	85942.1	57421	26340.4	37942.1	27758.1	29898.3	32087.2	27690.3	38878.2	41120.3	30023.6	35142.8	46570.8	31356.8	46030.3	28148.6
4-hydroperoxynonenal		HMDB0060287	6435432	NA	NA	1.10711e+06	1.31182e+06	1.11279e+06	1.0609e+06	708269	1.0635e+06	1.11293e+06	948679	1.34083e+06	1088378	1344857	1.07417e+06	975406	1193672	1.47277e+06	915421	799650	1.07559e+06	1.04515e+06	998577	1.14729e+06	1093040	1683246	1.22389e+06	826318	878308	1.16112e+06	990792	1.11744e+06	898486	894253	701173	398265	415068	533082	456364	548269	788674	363725	311804	545263	401831	661026	358165
4-Hydroxy-2,6-dimethyl-7-octen-3-one		HMDB0032119	15840278	NA	NA	403094	487353	495635	440662	329030	444513	463203	477301	503970	457144	413035	485976	370373	462660	608536	244537	382065	482415	408085	507728	526754	430094	599832	514565	407043	323168	416666	333202	431254	339426	338844	164164	125509	173980	161805	126286	154237	207961	131391	130946	231210	181746	183962	171513
4-Hydroxy-2-oxobutanoic acid		HMDB0031204	11963036	NA	NA	774808	692366	832251	717509	652307	737040	728509	771589	784721	729590	601656	644254	651646	838996	750323	517696	644675	750894	597250	703592	750330	620655	851764	857661	651532	697293	684638	547543	834269	678525	664080	437541	522601	526174	340238	414101	385389	560280	499217	417227	358125	534002	592698	417060
4-Hydroxy-2-oxoglutaric acid	identified	HMDB0002070	599	30923	C01127	90224.3	110289	61834.4	123772	11589.2	12202.8	0	8193.57	152282	143721	86859.8	9591.59	0	93395	4968.92	7965.91	32118.4	21436.8	14920.3	12434.9	77559.7	55105.8	46758.2	72776	14230.9	0	0	0	68321.9	0	6327.29	51453.3	119228	137478	114246	71652.3	73472.2	76688.2	235085	110517	134151	133271	109896	155037
4-Hydroxy-3-methoxy-2,10-bisaboladien-9-one		HMDB0033917	131751504	NA	NA	51364.8	57231.9	67872	56479.6	55632.9	49052.6	68279.1	57300.4	100088	94834.2	74995.6	71310.6	57234.5	57992.4	73714.5	36352.3	41200.8	50841.8	52447.9	67098	73261.4	57033.5	82439.3	71935.4	70799.7	78146.9	61996.7	70441.9	69344.8	62002.6	48545	46047.4	34406.5	54123.7	47467.7	42276.2	34604.6	68573.1	36333.5	59542.4	58769.3	53765.4	56718.2	47867
4-Hydroxy-4-methyl-5-hexenoic acid gamma lactone		HMDB0032333	102550	52939	NA	44527.8	38993	49939.9	33315.1	36861	39517.2	29847.9	28948.7	34893.1	51301.7	36034.5	31718.3	32598.4	41186	37746.6	26228.5	30983.7	34968.3	28658.7	34442.3	38471.1	31565.1	37294	39566.7	44184.7	29332.1	37357.3	31230.4	31835.1	30813.1	29212.8	46181.9	49299.9	35719.4	54526.2	68550.1	49160.3	56809.8	51342.4	56083.4	55079.3	65128.9	51810.2	46301.8
4-Hydroxy-4-methyl-7-decenoic acid gamma-lactone		HMDB0036191	6436439	NA	NA	62901	81140.9	63751.9	53882.4	39100.1	62278.2	74057.7	60978.1	56959.7	74157.6	67350.2	47522.9	57724.4	60781.4	106842	41259.9	61908	51837.9	39395.9	60619.9	48616.9	50778.8	65848.1	62783.6	39505.9	48705.6	49136.2	63438.6	65372.2	52545.7	48950.1	67099.3	101052	70110.2	69982.7	71691.4	87464.8	90415	71403.1	64993.5	88957	49645.8	96000.2	69621.5
4-Hydroxy-4-methylpentan-2-one		HMDB0031511	31256	55381	NA	2.28202e+06	2.44802e+06	2.67102e+06	2.37729e+06	1.93155e+06	2.6323e+06	2.47014e+06	2.29271e+06	2.73045e+06	2.28869e+06	1.81642e+06	2.91286e+06	2123246	2.36444e+06	3.60295e+06	1.21265e+06	2.30287e+06	2725161	2.07744e+06	2.60667e+06	2.36361e+06	2.30766e+06	2.52162e+06	2.78959e+06	2.28737e+06	1.12185e+06	2.00102e+06	1.85176e+06	2.33975e+06	2.17494e+06	1.74504e+06	5.44662e+06	5.28788e+06	8102586	5.45059e+06	5136677	5261508	5.85648e+06	7194426	4609864	5.51374e+06	5.88861e+06	7103756	7120424
4-Hydroxy-5-phenyltetrahydro-1,3-oxazin-2-one		HMDB0060389	21350392	NA	C16595	6587127	4.16879e+06	6.30587e+06	7792590	4.18358e+06	1.74925e+06	5.40687e+06	3.61735e+06	11999195	11344791	9277816	5.75582e+06	2384798	2.46608e+06	5150483	3.46516e+06	13389025	4.71414e+06	3.93841e+06	4.68055e+06	7.57211e+06	5965610	3.18663e+06	7.46534e+06	2.5519e+06	2.15357e+06	2528101	2.98205e+06	2.38889e+06	5290917	5.17531e+06	4.40393e+06	6.08301e+06	7.02355e+06	4.0611e+06	1.88017e+06	3.30362e+06	2880879	5.28289e+06	3697161	4.27324e+06	8676850	17222070	7.97825e+06
4'-Hydroxyacetophenone		METPA0982	NA	28032	C10700	68708.7	43528.7	48824.3	60176.8	52616.3	44124.8	56966.1	53439.2	87107.1	48783.8	38835.6	67959.7	41229.5	70931.5	102748	35358.7	59270.8	75816.7	48448.1	51040.8	47556.7	48478.1	70897.2	80392.3	44660.4	42313.2	64034.5	50219.4	82217.8	60804.1	53950.5	44770.6	35554.1	42831.3	32625.2	34227.4	42066.8	40043.4	40433.9	37215.5	34516.2	53182.6	56201.9	46961.7
4-Hydroxyaniline		HMDB0001169	403	17602	C02372	137024	181917	148481	141960	210147	146211	142312	142233	131669	168935	137892	167933	159226	162502	149453	156901	172888	197995	209576	119640	122754	189671	134492	165691	130888	134714	109557	98458.5	159926	149268	184910	251744	237183	269401	212994	174106	264058	235835	226974	291733	275880	237253	239739	257599
4-Hydroxycyclohexylcarboxylic acid		HMDB0001988	151138	16817	C04404	507023	524647	577936	465538	644696	510851	624104	470573	607443	515979	399720	515329	483170	636778	591673	260767	621082	665849	483434	598172	526419	464794	694870	625573	380769	251253	431089	360144	495646	486602	410461	625458	886744	604284	566491	674107	531917	929207	560714	696493	707494	772478	954141	690575
4-Hydroxyphenylacetaldehyde		HMDB0003767	440113	15621	C03765	68708.7	43528.7	48824.3	60176.8	52616.3	44124.8	56966.1	53439.2	87107.1	48783.8	38835.6	67959.7	41229.5	70931.5	102748	35358.7	59270.8	75816.7	48448.1	51040.8	47556.7	48478.1	70897.2	80392.3	44660.4	42313.2	64034.5	50219.4	82217.8	60804.1	53950.5	44770.6	35554.1	42831.3	32625.2	34227.4	42066.8	40043.4	40433.9	37215.5	34516.2	53182.6	56201.9	46961.7
4-Hydroxypropofol		HMDB0014018	3014064	NA	NA	151667	125457	146408	122789	85130.3	115858	128881	98168.7	137868	129400	123148	102185	100871	126715	165295	93591.6	127904	128741	103532	117243	106050	126700	150913	131959	106466	83258.6	100243	96871.8	137405	128675	94347.1	95805.1	88245.5	50123.4	85965.7	102175	92384.1	103824	63369.8	133098	138871	97121	80252.8	93801.3
4-Isopropylbenzoic acid		HMDB0035268	10820	28122	C06578	319857	360362	339209	294864	228467	318225	320920	294556	366724	307306	281947	314430	291533	318799	391287	246331	823553	543953	325456	761641	329494	277535	871394	326916	267529	187581	292959	203942	315391	243716	205839	82776.2	110117	97077.6	225574	51406.6	43058.9	110897	113319	57713.3	64605.6	159978	94811.4	64758.7
4-Methoxybenzyl butanoate		HMDB0034991	243675	NA	NA	45176	45628.5	51174	34194	22415.2	39135.1	26801.2	24636.3	51815.2	50444.6	31284.9	41873.3	35140.4	29461.5	47013	20175.3	37899.1	26876.7	29734.7	20121.4	28143	43389.1	50165.4	39652.5	30522.9	30218.9	27476.8	26820.2	48262.9	25679.8	29160.9	62292.7	47120.5	31420	45543.4	82195.1	40295.9	108252	45469.3	33411.6	79106	53372.2	123836	40799.1
4-Methyl-2,3-pentanedione		HMDB0031559	24115	NA	NA	34268.5	41824.2	35106.6	33477.2	26908.6	25498.6	20700.8	25431.6	29058.4	54635.9	36317.1	21701.8	32713	30171.6	25063.2	24736.9	42240.8	34513.8	29363.7	21539.5	41238	27241.5	31996.4	38251.2	27664.1	28445.2	36077.6	29127.1	46560.4	25445.9	30581.6	48619.4	51196.1	43480.4	66593.1	114095	57434.8	130957	79610.3	40931.3	47211.8	52152.9	121125	54604.3
4-Methyl-2-pentenoic acid		HMDB0031561	12216200	NA	NA	34268.5	41824.2	35106.6	33477.2	26908.6	25498.6	20700.8	25431.6	29058.4	54635.9	36317.1	21701.8	32713	30171.6	25063.2	24736.9	42240.8	34513.8	29363.7	21539.5	41238	27241.5	31996.4	38251.2	27664.1	28445.2	36077.6	29127.1	46560.4	25445.9	30581.6	48619.4	51196.1	43480.4	66593.1	114095	57434.8	130957	79610.3	40931.3	47211.8	52152.9	121125	54604.3
4-Methyl-2-pentyl-1,3-dioxolane		HMDB0037288	15336	NA	NA	31059080	36333212	35153816	31346394	26063910	34265028	37671056	37614436	32756472	31222842	25990618	35452616	24216608	31566360	49759612	18183924	29314668	36772668	29634554	34388456	37593128	31483394	42794468	35495564	31823804	20526698	28560828	22274504	30226706	26423828	20904814	21439336	16472399	28092744	17140688	14065325	19779730	23878034	20280954	17347108	17172318	22708688	19138784	27444522
4-Methyl-2-phenyl-1,3-dioxolane		HMDB0037160	595928	NA	NA	319857	360362	339209	294864	228467	318225	320920	294556	366724	307306	281947	314430	291533	318799	391287	246331	823553	543953	325456	761641	329494	277535	871394	326916	267529	187581	292959	203942	315391	243716	205839	82776.2	110117	97077.6	225574	51406.6	43058.9	110897	113319	57713.3	64605.6	159978	94811.4	64758.7
4-Methylbenzoic acid		HMDB0029635	7470	36635	C01454	68708.7	43528.7	48824.3	60176.8	52616.3	44124.8	56966.1	53439.2	87107.1	48783.8	38835.6	67959.7	41229.5	70931.5	102748	35358.7	59270.8	75816.7	48448.1	51040.8	47556.7	48478.1	70897.2	80392.3	44660.4	42313.2	64034.5	50219.4	82217.8	60804.1	53950.5	44770.6	35554.1	42831.3	32625.2	34227.4	42066.8	40043.4	40433.9	37215.5	34516.2	53182.6	56201.9	46961.7
4-Methylbenzyl alcohol acetate		HMDB0040460	75187	NA	NA	319857	360362	339209	294864	228467	318225	320920	294556	366724	307306	281947	314430	291533	318799	391287	246331	823553	543953	325456	761641	329494	277535	871394	326916	267529	187581	292959	203942	315391	243716	205839	82776.2	110117	97077.6	225574	51406.6	43058.9	110897	113319	57713.3	64605.6	159978	94811.4	64758.7
4-Methylnonanoic acid		HMDB0034849	62003	NA	NA	9949007	11504798	11419062	9327990	7611035	10557322	12258934	11924596	11121203	10087879	8976714	11839756	8963184	10683619	14898223	6.08635e+06	9378611	12510601	10533930	10980307	12879971	9452784	13969028	11505806	9738459	7.43292e+06	9378756	7251482	9339049	8226159	6.97687e+06	2.77864e+06	3.51156e+06	5.40678e+06	3.36879e+06	2.54327e+06	3.71239e+06	5.53706e+06	3.01635e+06	2.83467e+06	3.79552e+06	4814188	3.59266e+06	5.48434e+06
4-methyl-octanoic acid		HMDB0031557	62089	NA	NA	31059080	36333212	35153816	31346394	26063910	34265028	37671056	37614436	32756472	31222842	25990618	35452616	24216608	31566360	49759612	18183924	29314668	36772668	29634554	34388456	37593128	31483394	42794468	35495564	31823804	20526698	28560828	22274504	30226706	26423828	20904814	21439336	16472399	28092744	17140688	14065325	19779730	23878034	20280954	17347108	17172318	22708688	19138784	27444522
4-Methylpentan-2-one		HMDB0002939	7909	82344	C19263	68246.8	83025.3	90228.6	82355.9	60371	52449.1	65304.2	57858.9	73487.2	61006.2	63588.6	72858.2	68669.2	66007.4	80947.1	43598.9	51475	60406.7	59755.3	74676.6	64620.4	56799.2	82646.3	83299.2	57985.2	33929.2	55306.2	56844.3	73361	64224.9	68825.9	47325.6	47134.3	59048.8	58439	46417.4	50584.9	58185.1	45011.6	42323.3	47624.8	60008.5	61950.2	49526.8
4-Methylpentanal		HMDB0001318	129	17998	C02373	68246.8	83025.3	90228.6	82355.9	60371	52449.1	65304.2	57858.9	73487.2	61006.2	63588.6	72858.2	68669.2	66007.4	80947.1	43598.9	51475	60406.7	59755.3	74676.6	64620.4	56799.2	82646.3	83299.2	57985.2	33929.2	55306.2	56844.3	73361	64224.9	68825.9	47325.6	47134.3	59048.8	58439	46417.4	50584.9	58185.1	45011.6	42323.3	47624.8	60008.5	61950.2	49526.8
4-Octen-3-one		HMDB0032451	5369061	NA	NA	69843.6	78615.2	63940	66103.5	62192.9	55711	65202.7	80624	91736.6	102287	50228.8	65130.9	58881.1	62038.8	69958.4	29119.2	39570	55943.8	39152.8	67235.7	53858	44080.1	80048	64278.9	39105.8	43593.3	87947.1	53212.1	54701.4	51159.3	48326.9	56044.6	31629.5	61795.2	44705.4	41984	42903.3	57068.2	53858.8	30655.1	31250.8	62713.1	64284.5	50033.9
4-Oxoglutaramate		METPA0618	NA	27467	C05572	65208.2	74611.3	72839.7	89761.4	59686.5	74341.3	71884.6	64128.7	74983.5	88911.4	81326.9	60609.5	85960.3	66901.2	87312.7	59483.6	93583.5	156239	67761.4	118765	84825.7	105026	100989	90994	68031.6	75463.5	57319.5	62360.3	67965.1	62772.9	79839.1	84172.9	84212.5	103256	75932.1	75549.3	59407.8	77868.7	78535.6	70292.8	102359	110949	84214.4	111024
4-Oxoproline		METPA0228	NA	16821	C01877	2.70472e+06	2.59688e+06	2963935	2.94483e+06	2.69327e+06	3.41179e+06	3.54092e+06	3.54544e+06	2.92903e+06	2.81881e+06	3.29909e+06	2750800	3.44404e+06	2.90506e+06	3229938	3.60681e+06	3968073	4.00734e+06	4216474	5.67088e+06	4.77157e+06	3611308	4.6253e+06	4.73089e+06	4800854	4568997	3.15983e+06	3.1172e+06	3.60034e+06	2.51572e+06	2.77714e+06	4.18697e+06	3582345	2.55328e+06	2315090	2933072	2.84001e+06	2.70779e+06	3499983	4.15245e+06	4940586	2.33787e+06	2.76964e+06	3.48574e+06
4-penten-2-one		HMDB0031606	83797	87508	NA	75519.4	80879.1	67980.6	87867.8	61007.5	61489.5	61430	56223.3	56604.2	78104.3	68954.1	84552.6	59839.8	86573.8	71819.4	65029.5	58213.9	54010.2	68718.4	39045.8	79992.7	58417.2	128319	51115	76859.9	69534.4	84998.8	61067.6	71433.4	76576.7	70756.6	80120.5	64817.1	60440.7	51578.2	55921.9	74286.1	89296.9	38499.3	46812.9	45178.3	56000.1	72622	54148.8
4-Pentenal		HMDB0032458	16418	NA	NA	75519.4	80879.1	67980.6	87867.8	61007.5	61489.5	61430	56223.3	56604.2	78104.3	68954.1	84552.6	59839.8	86573.8	71819.4	65029.5	58213.9	54010.2	68718.4	39045.8	79992.7	58417.2	128319	51115	76859.9	69534.4	84998.8	61067.6	71433.4	76576.7	70756.6	80120.5	64817.1	60440.7	51578.2	55921.9	74286.1	89296.9	38499.3	46812.9	45178.3	56000.1	72622	54148.8
4-Thiocyanatophenol		HMDB0040578	220327	NA	NA	69146	66406.9	71075.9	57347.4	120612	109491	67646.7	71215.3	65545.6	69199.5	60398.8	101186	91194.6	125028	90425	68901.4	76654.4	101708	117663	83763	87673.9	79120.6	108908	138054	90827.4	105211	79648.9	93056.3	68019.5	73495.9	91165.2	83302.7	79162	75346.1	67191.5	50486.5	62832.5	62312.9	53366.9	67520.8	90846.7	76777.5	61056.8	66258.8
5-(3E-Pentenyl)tetrahydro-2-oxo-3-furancarboxylic acid		HMDB0030991	131751117	NA	NA	26771.8	26920.9	36438.9	27563.2	24175.7	26688.8	24814.6	19594.8	40371.3	37100.1	39233.9	39637.4	29362.7	31115.6	38607.5	16412.3	25980.1	26939.5	32274.7	22367.6	28163.7	35621.6	23877.7	38096.1	19653.9	26501.9	29459.1	21171.9	44009.7	33353.9	20259	25953.2	57428.5	33063.5	35804	39932.4	30209.2	74966.6	29082.6	22442.6	32136	55650.3	64242.3	46928
5,5-Diisopropyl-2,2'-dimethylbiphenyl-3,3',4,4'-tetrone		HMDB0040762	14375763	NA	NA	168293	191242	238324	248194	260242	255421	285170	194106	232787	208401	194614	238684	303154	336253	291686	226406	227152	336308	268883	338464	257795	268245	299406	266150	285317	243513	223190	288560	233458	235176	208015	196312	224927	187930	248024	238104	204304	186267	184343	159675	269333	186109	213827	244912
5-Acetyl-3,4-dihydro-2H-pyrrole		HMDB0031308	522834	67125	NA	115103	130366	97723	97635.9	111172	126286	62059.4	79497.4	121732	105891	106295	112470	103019	114550	82833.3	94169.4	121909	87640.8	75014.7	102994	84054.2	106682	83274.2	111011	96818.4	90942.4	81423.1	89552.9	120609	106551	126897	148684	117718	141509	149991	131721	159041	190374	166110	148949	166086	171075	197129	148022
5-Butyl-1,4-dioxan-2-one		HMDB0059938	24847851	NA	NA	725537	909899	730622	661799	538843	590477	709836	769860	872325	735692	576060	751613	629733	809478	873124	356186	678111	785050	609766	585886	755381	538295	714600	879770	470162	443530	632329	476894	687153	645897	543934	629235	455056	444668	450805	589883	435334	799372	417877	411818	597636	414990	858311	421107
5-Butyl-4-ethyl-2-methyloxazole		HMDB0037885	71414755	NA	NA	22173.6	28588.2	36088.1	41721.1	26083	28621.8	35929.6	26325.3	44398.4	28047.7	57709	21199.7	32568.1	47395.6	47178.1	37037.6	39350.5	31557.2	43501.5	30107	29905.2	31201.5	40489.9	59699.5	27541.5	36362.4	20835.3	36348.1	36513.3	41101.9	62423.3	26936.2	28482.5	38131.6	18079.7	19509.9	22518	19080.5	29764.5	22112.7	20566.2	23980.3	32286.2	18213.7
5-Butyl-4-methyl-2-propyloxazole		HMDB0037896	86025808	NA	NA	55691.6	50090.5	59847.1	56345.2	32780.5	42912.7	71514.6	63176.4	57799.3	35530.9	118111	57174.5	38775	45702.3	108898	57400.1	53446.2	39112	60662.1	28769.4	34440.9	51182.5	122514	76868.9	35260.8	32087.9	36011.5	60429.4	85942.1	57421	26340.4	37942.1	27758.1	29898.3	32087.2	27690.3	38878.2	41120.3	30023.6	35142.8	46570.8	31356.8	46030.3	28148.6
5-Decenoic acid		HMDB0039768	5362593	NA	NA	403094	487353	495635	440662	329030	444513	463203	477301	503970	457144	413035	485976	370373	462660	608536	244537	382065	482415	408085	507728	526754	430094	599832	514565	407043	323168	416666	333202	431254	339426	338844	164164	125509	173980	161805	126286	154237	207961	131391	130946	231210	181746	183962	171513
5-Dehydro-4-deoxy-D-glucuronate		METPA0464	NA	17117	C04053	86009.7	53816.3	96898.4	158729	17359.2	22047.2	20894.4	15473	126020	219010	296910	33325.7	21528.4	355547	16976	21381	22904.3	42743.3	39629.5	31104.8	223303	161438	88976.9	116273	25044.4	26441.2	38892	12461.4	130659	17680.8	16443	95101.7	276626	156565	136583	95205.2	242368	68085.4	106681	93256.6	325512	160949	153976	183997
5-Deoxydiplosporin		HMDB0030681	131751070	NA	NA	45176	45628.5	51174	34194	22415.2	39135.1	26801.2	24636.3	51815.2	50444.6	31284.9	41873.3	35140.4	29461.5	47013	20175.3	37899.1	26876.7	29734.7	20121.4	28143	43389.1	50165.4	39652.5	30522.9	30218.9	27476.8	26820.2	48262.9	25679.8	29160.9	62292.7	47120.5	31420	45543.4	82195.1	40295.9	108252	45469.3	33411.6	79106	53372.2	123836	40799.1
5-Deoxykievitone		HMDB0034214	442770	63	C10418	34603.2	21859.4	32142.9	30793.5	29032.4	30646.3	32753.5	28928.7	26253.6	29156.7	33137.4	30177.1	34340.1	30020	37457.9	37909.2	35543	37206.3	42986.1	62836.8	45690.9	33397.3	46512.1	44434.3	38034.6	40741.5	32746.2	29033.5	37974.5	21926.9	27766.9	42830.6	38999.8	28534.6	22753.4	24995.9	23249.5	32167.5	38518.3	38379	42153.3	30342.7	29325	37245.7
5-Deoxykievitone hydrate		HMDB0038113	44257380	NA	NA	25088.2	28424.6	31842.8	25097.1	39484.9	31643.6	30465.5	44049.1	30460.6	25144.5	26152.2	26935.1	30084.8	28325	29504.2	43233.8	53112.1	44789.8	39069.8	53137.9	35706.9	35725.4	45762	25718.4	22948.8	37598	29005.2	22511.4	41954.9	25144.6	30681.8	28306.7	31779.5	31078.1	22328.9	39238.7	25044.3	22516.7	32336.8	35382.9	28293.2	29937.1	28883	32239.4
5-Ethyl-2-methyloxazole		HMDB0037859	528407	NA	NA	115103	130366	97723	97635.9	111172	126286	62059.4	79497.4	121732	105891	106295	112470	103019	114550	82833.3	94169.4	121909	87640.8	75014.7	102994	84054.2	106682	83274.2	111011	96818.4	90942.4	81423.1	89552.9	120609	106551	126897	148684	117718	141509	149991	131721	159041	190374	166110	148949	166086	171075	197129	148022
5-Ethyl-4-methyl-2-pentyloxazole		HMDB0037889	525788	NA	NA	55691.6	50090.5	59847.1	56345.2	32780.5	42912.7	71514.6	63176.4	57799.3	35530.9	118111	57174.5	38775	45702.3	108898	57400.1	53446.2	39112	60662.1	28769.4	34440.9	51182.5	122514	76868.9	35260.8	32087.9	36011.5	60429.4	85942.1	57421	26340.4	37942.1	27758.1	29898.3	32087.2	27690.3	38878.2	41120.3	30023.6	35142.8	46570.8	31356.8	46030.3	28148.6
5-Ethyl-4-methyloxazole		HMDB0037863	207286	NA	NA	115103	130366	97723	97635.9	111172	126286	62059.4	79497.4	121732	105891	106295	112470	103019	114550	82833.3	94169.4	121909	87640.8	75014.7	102994	84054.2	106682	83274.2	111011	96818.4	90942.4	81423.1	89552.9	120609	106551	126897	148684	117718	141509	149991	131721	159041	190374	166110	148949	166086	171075	197129	148022
5-Hexyldihydro-4-methyl-2(3H)-furanone		HMDB0037309	106756	NA	NA	309034	320740	293821	269294	217104	283689	311343	362226	288594	268578	271059	298196	265667	311945	376786	205478	259773	331045	247427	291458	327829	265874	391031	354682	286991	228648	301005	247328	305922	248143	192236	79297.4	74478.3	86984.4	87988.8	61451.4	63170	86007.9	65822.3	57758.6	138894	79557.3	69502.4	59403.4
5-Hexyldihydro-5-methyl-2(3H)-furanone		HMDB0036140	285097	NA	NA	309034	320740	293821	269294	217104	283689	311343	362226	288594	268578	271059	298196	265667	311945	376786	205478	259773	331045	247427	291458	327829	265874	391031	354682	286991	228648	301005	247328	305922	248143	192236	79297.4	74478.3	86984.4	87988.8	61451.4	63170	86007.9	65822.3	57758.6	138894	79557.3	69502.4	59403.4
5-Hexyltetrahydro-2-oxo-3-furancarboxylic acid		HMDB0030984	10375946	NA	NA	60719.4	38525.9	53797.3	48507.5	50330.1	50617.5	63403.1	47744.4	54002.6	47361.8	48124.3	47101.7	37147.1	43107.2	55953.4	32863.9	33222.7	53820	36715.6	52124.4	50090.9	56088.4	68338.5	57104.9	43013.9	29355.5	56470	39191.8	39084.1	42446.8	43942.7	35391.1	26902.8	33376.4	38208.5	44323	28739.6	53318.6	33775.3	26542.4	33828.2	39253	49728.5	24020.6
5-hydroxy caproic acid		HMDB0000525	170748	131434	NA	325808	397432	341500	309214	236865	242158	333978	275568	467726	339154	344064	309472	264954	371445	366957	203836	334007	327211	252096	272780	307163	293697	376911	401865	202274	237681	257716	213396	309933	338272	241916	120140	114052	122455	107787	123662	93379.2	107378	98495.5	152286	166687	134491	124153	123728
5-Hydroxy-2,4-dioxopentanoate		METPA0588	NA	28679	C05406	565769	769254	724870	466766	872627	891142	717712	1.09402e+06	542823	488448	611947	635900	760856	695620	789646	1.31487e+06	1.36864e+06	1309284	927179	1.62181e+06	1.00036e+06	800706	931377	778597	734617	597023	688524	597968	922982	847934	832112	686481	517598	505763	849670	590742	470937	511805	768763	653276	708175	448122	450988	660151
5-Hydroxy-p-mentha-6,8-dien-2-one		HMDB0037011	14379178	138750	NA	125608	137869	162940	113897	69438.4	111236	117134	113408	198233	166327	113129	95501.3	111009	147315	107696	60184.6	127233	122066	126081	85493.6	102991	85812.9	142585	174777	76043.9	70660.7	81507.4	79837	108682	119309	97758.3	119131	165126	126387	117883	174560	128250	242214	153779	147094	177844	156160	190980	161819
5-Imino-2-methyl-1-cyclopenten-1-ol		HMDB0039584	12311489	NA	NA	115103	130366	97723	97635.9	111172	126286	62059.4	79497.4	121732	105891	106295	112470	103019	114550	82833.3	94169.4	121909	87640.8	75014.7	102994	84054.2	106682	83274.2	111011	96818.4	90942.4	81423.1	89552.9	120609	106551	126897	148684	117718	141509	149991	131721	159041	190374	166110	148949	166086	171075	197129	148022
5-Methyl-5-hepten-2-one		HMDB0031591	12663437	NA	NA	69843.6	78615.2	63940	66103.5	62192.9	55711	65202.7	80624	91736.6	102287	50228.8	65130.9	58881.1	62038.8	69958.4	29119.2	39570	55943.8	39152.8	67235.7	53858	44080.1	80048	64278.9	39105.8	43593.3	87947.1	53212.1	54701.4	51159.3	48326.9	56044.6	31629.5	61795.2	44705.4	41984	42903.3	57068.2	53858.8	30655.1	31250.8	62713.1	64284.5	50033.9
5-methyl-hexanoic acid		HMDB0031595	12344	NA	NA	1932490	2.05705e+06	1.87968e+06	1.95561e+06	1428820	2018299	2321765	2.21171e+06	2.18895e+06	1.55261e+06	1.65363e+06	2.01794e+06	1.6277e+06	1.92967e+06	2949656	1.03395e+06	1.80162e+06	2.40727e+06	1.94378e+06	2.37845e+06	1.89925e+06	1.93736e+06	2.65658e+06	2244925	1.91416e+06	936736	1.58099e+06	1.48376e+06	1.76527e+06	1.55873e+06	1486326	2.97911e+06	2547794	4.40414e+06	3.04848e+06	2.59234e+06	2801523	2935630	3807720	2620054	2618856	3.38579e+06	3001957	3.93279e+06
5-Methylhexyl acetate		HMDB0032406	22182954	NA	NA	31059080	36333212	35153816	31346394	26063910	34265028	37671056	37614436	32756472	31222842	25990618	35452616	24216608	31566360	49759612	18183924	29314668	36772668	29634554	34388456	37593128	31483394	42794468	35495564	31823804	20526698	28560828	22274504	30226706	26423828	20904814	21439336	16472399	28092744	17140688	14065325	19779730	23878034	20280954	17347108	17172318	22708688	19138784	27444522
5-Octen-2-one		HMDB0035390	5352779	NA	NA	69843.6	78615.2	63940	66103.5	62192.9	55711	65202.7	80624	91736.6	102287	50228.8	65130.9	58881.1	62038.8	69958.4	29119.2	39570	55943.8	39152.8	67235.7	53858	44080.1	80048	64278.9	39105.8	43593.3	87947.1	53212.1	54701.4	51159.3	48326.9	56044.6	31629.5	61795.2	44705.4	41984	42903.3	57068.2	53858.8	30655.1	31250.8	62713.1	64284.5	50033.9
5-octenal		HMDB0039770	5283327	NA	NA	69843.6	78615.2	63940	66103.5	62192.9	55711	65202.7	80624	91736.6	102287	50228.8	65130.9	58881.1	62038.8	69958.4	29119.2	39570	55943.8	39152.8	67235.7	53858	44080.1	80048	64278.9	39105.8	43593.3	87947.1	53212.1	54701.4	51159.3	48326.9	56044.6	31629.5	61795.2	44705.4	41984	42903.3	57068.2	53858.8	30655.1	31250.8	62713.1	64284.5	50033.9
5-Octenyl propanoate		HMDB0038906	11041412	NA	NA	309034	320740	293821	269294	217104	283689	311343	362226	288594	268578	271059	298196	265667	311945	376786	205478	259773	331045	247427	291458	327829	265874	391031	354682	286991	228648	301005	247328	305922	248143	192236	79297.4	74478.3	86984.4	87988.8	61451.4	63170	86007.9	65822.3	57758.6	138894	79557.3	69502.4	59403.4
5-Oxo-D-proline		HMDB0000805	499	16924	C02237	2.70472e+06	2.59688e+06	2963935	2.94483e+06	2.69327e+06	3.41179e+06	3.54092e+06	3.54544e+06	2.92903e+06	2.81881e+06	3.29909e+06	2750800	3.44404e+06	2.90506e+06	3229938	3.60681e+06	3968073	4.00734e+06	4216474	5.67088e+06	4.77157e+06	3611308	4.6253e+06	4.73089e+06	4800854	4568997	3.15983e+06	3.1172e+06	3.60034e+06	2.51572e+06	2.77714e+06	4.18697e+06	3582345	2.55328e+06	2315090	2933072	2.84001e+06	2.70779e+06	3499983	4.15245e+06	4940586	2.33787e+06	2.76964e+06	3.48574e+06
5-Oxohexanal		HMDB0033568	10953466	NA	NA	34268.5	41824.2	35106.6	33477.2	26908.6	25498.6	20700.8	25431.6	29058.4	54635.9	36317.1	21701.8	32713	30171.6	25063.2	24736.9	42240.8	34513.8	29363.7	21539.5	41238	27241.5	31996.4	38251.2	27664.1	28445.2	36077.6	29127.1	46560.4	25445.9	30581.6	48619.4	51196.1	43480.4	66593.1	114095	57434.8	130957	79610.3	40931.3	47211.8	52152.9	121125	54604.3
5-Oxoproline	identified	HMDB0000267	7405	18183	C01879	2.70472e+06	2.59688e+06	2963935	2.94483e+06	2.69327e+06	3.41179e+06	3.54092e+06	3.54544e+06	2.92903e+06	2.81881e+06	3.29909e+06	2750800	3.44404e+06	2.90506e+06	3229938	3.60681e+06	3968073	4.00734e+06	4216474	5.67088e+06	4.77157e+06	3611308	4.6253e+06	4.73089e+06	4800854	4568997	3.15983e+06	3.1172e+06	3.60034e+06	2.51572e+06	2.77714e+06	4.18697e+06	3582345	2.55328e+06	2315090	2933072	2.84001e+06	2.70779e+06	3499983	4.15245e+06	4940586	2.33787e+06	2.76964e+06	3.48574e+06
5-Pentyl-1,4-dioxan-2-one		HMDB0059936	53435896	NA	NA	1.10711e+06	1.31182e+06	1.11279e+06	1.0609e+06	708269	1.0635e+06	1.11293e+06	948679	1.34083e+06	1088378	1344857	1.07417e+06	975406	1193672	1.47277e+06	915421	799650	1.07559e+06	1.04515e+06	998577	1.14729e+06	1093040	1683246	1.22389e+06	826318	878308	1.16112e+06	990792	1.11744e+06	898486	894253	701173	398265	415068	533082	456364	548269	788674	363725	311804	545263	401831	661026	358165
5-Pentyl-3h-furan-2-one		HMDB0032463	9855656	NA	NA	62901	81140.9	63751.9	53882.4	39100.1	62278.2	74057.7	60978.1	56959.7	74157.6	67350.2	47522.9	57724.4	60781.4	106842	41259.9	61908	51837.9	39395.9	60619.9	48616.9	50778.8	65848.1	62783.6	39505.9	48705.6	49136.2	63438.6	65372.2	52545.7	48950.1	67099.3	101052	70110.2	69982.7	71691.4	87464.8	90415	71403.1	64993.5	88957	49645.8	96000.2	69621.5
5Z-Octenyl acetate		HMDB0029358	5352838	NA	NA	403094	487353	495635	440662	329030	444513	463203	477301	503970	457144	413035	485976	370373	462660	608536	244537	382065	482415	408085	507728	526754	430094	599832	514565	407043	323168	416666	333202	431254	339426	338844	164164	125509	173980	161805	126286	154237	207961	131391	130946	231210	181746	183962	171513
6-(3-Hexenyl)tetrahydro-2H-pyran-2-one		HMDB0037829	20846226	NA	NA	62901	81140.9	63751.9	53882.4	39100.1	62278.2	74057.7	60978.1	56959.7	74157.6	67350.2	47522.9	57724.4	60781.4	106842	41259.9	61908	51837.9	39395.9	60619.9	48616.9	50778.8	65848.1	62783.6	39505.9	48705.6	49136.2	63438.6	65372.2	52545.7	48950.1	67099.3	101052	70110.2	69982.7	71691.4	87464.8	90415	71403.1	64993.5	88957	49645.8	96000.2	69621.5
6,6-Dimethoxy-2,5,5-trimethyl-2-hexene		HMDB0036034	106766	NA	NA	1.69237e+06	2.03593e+06	1.91863e+06	1.48279e+06	1.27121e+06	1.57707e+06	2.09075e+06	1.89838e+06	1.92771e+06	1.75543e+06	1.51771e+06	1.82407e+06	1.44055e+06	1.84583e+06	2.4127e+06	1.11724e+06	1521156	2.04302e+06	1609977	1.77459e+06	2.2223e+06	1.56491e+06	2.2154e+06	1.98399e+06	1.73029e+06	1.23412e+06	1.65599e+06	1.2052e+06	1.69875e+06	1.35488e+06	1.21874e+06	298319	420139	511203	302649	268375	350309	670715	291895	289214	395764	515219	399649	605233
6,9,12,15-octadecatetraenoic acid		HMDB06547	5282837	32389	C16300	68029.5	56685.5	83613	62422.6	54161.3	77995.1	71818.2	67650.1	61443.4	54447.4	63161	79604.1	78711.9	67863.5	72375.7	59657.3	69928.1	75208.9	58670.3	96465.3	70390.8	89965.6	108794	102279	40698.4	115174	82173.8	50248.8	69725.4	74771.1	57119.8	43977.6	53785.6	80043.4	32389.3	50028.1	40109.9	61678.4	42807.7	35329.6	84726.8	39409.2	71865.1	45519.9
6b-Hydroxy-8a-methoxy-7(11)-eremophilen-12,8-olide		HMDB0036979	131752123	NA	NA	68552.9	65692.4	81926.3	54333.5	61757.8	83041.9	72982.4	66182.8	61046.3	78017.9	78845.5	64957.7	73787.2	74201.5	80271.7	38739.4	62064.7	77781.7	50401.8	97928.7	64149.8	47747.8	69351.8	73578.3	38842.8	40843.1	80844.6	45661.6	86723.7	46119.9	49557.9	39480.4	45738.6	39495	40828.1	39281.1	49086.9	34851.1	38345.3	51467.8	29895.4	38204	39700.8	27877.5
6-Butyl-1,4-dioxan-2-one		HMDB0059939	19993349	NA	NA	725537	909899	730622	661799	538843	590477	709836	769860	872325	735692	576060	751613	629733	809478	873124	356186	678111	785050	609766	585886	755381	538295	714600	879770	470162	443530	632329	476894	687153	645897	543934	629235	455056	444668	450805	589883	435334	799372	417877	411818	597636	414990	858311	421107
6-Decanolide		HMDB0033203	62583	NA	NA	403094	487353	495635	440662	329030	444513	463203	477301	503970	457144	413035	485976	370373	462660	608536	244537	382065	482415	408085	507728	526754	430094	599832	514565	407043	323168	416666	333202	431254	339426	338844	164164	125509	173980	161805	126286	154237	207961	131391	130946	231210	181746	183962	171513
6-Decenoic acid		HMDB0041012	5362594	NA	NA	403094	487353	495635	440662	329030	444513	463203	477301	503970	457144	413035	485976	370373	462660	608536	244537	382065	482415	408085	507728	526754	430094	599832	514565	407043	323168	416666	333202	431254	339426	338844	164164	125509	173980	161805	126286	154237	207961	131391	130946	231210	181746	183962	171513
6-endo-hydroxycineole		HMDB0059610	6857383	16271	C03092	403094	487353	495635	440662	329030	444513	463203	477301	503970	457144	413035	485976	370373	462660	608536	244537	382065	482415	408085	507728	526754	430094	599832	514565	407043	323168	416666	333202	431254	339426	338844	164164	125509	173980	161805	126286	154237	207961	131391	130946	231210	181746	183962	171513
6-Ethyl-1-methyl-2,7,8-trioxabicyclo[3.2.1]octane		HMDB0030303	101409684	NA	NA	725537	909899	730622	661799	538843	590477	709836	769860	872325	735692	576060	751613	629733	809478	873124	356186	678111	785050	609766	585886	755381	538295	714600	879770	470162	443530	632329	476894	687153	645897	543934	629235	455056	444668	450805	589883	435334	799372	417877	411818	597636	414990	858311	421107
6-Heptyl-5,6-dihydro-2H-pyran-2-one		HMDB0031030	61834	NA	NA	76362.4	90894.3	75547.2	68709.6	61595.6	78885	63850.5	79108	76052.9	78752.7	65333.5	63889.2	66364.3	84609.9	92349.7	44671.4	65743.4	80538.1	56871.4	62028.6	70401.1	53480.2	83910.6	71551.6	58390.6	36650.1	65737.9	57321.8	69636.9	59518	58123.4	29197.2	20682.8	28552	27393	19356.9	29384.6	34331.1	25908.6	27730.2	33053.5	27211.6	33980.7	23951.8
6-Hexyltetrahydro-2H-pyran-2-one		HMDB0036784	61204	NA	NA	309034	320740	293821	269294	217104	283689	311343	362226	288594	268578	271059	298196	265667	311945	376786	205478	259773	331045	247427	291458	327829	265874	391031	354682	286991	228648	301005	247328	305922	248143	192236	79297.4	74478.3	86984.4	87988.8	61451.4	63170	86007.9	65822.3	57758.6	138894	79557.3	69502.4	59403.4
6-Hydroxyhexanoic acid		HMDB0012843	14490	17869	C06103	325808	397432	341500	309214	236865	242158	333978	275568	467726	339154	344064	309472	264954	371445	366957	203836	334007	327211	252096	272780	307163	293697	376911	401865	202274	237681	257716	213396	309933	338272	241916	120140	114052	122455	107787	123662	93379.2	107378	98495.5	152286	166687	134491	124153	123728
6-Methyl-5-hepten-2-one		HMDB0035915	9862	16310	C07287	69843.6	78615.2	63940	66103.5	62192.9	55711	65202.7	80624	91736.6	102287	50228.8	65130.9	58881.1	62038.8	69958.4	29119.2	39570	55943.8	39152.8	67235.7	53858	44080.1	80048	64278.9	39105.8	43593.3	87947.1	53212.1	54701.4	51159.3	48326.9	56044.6	31629.5	61795.2	44705.4	41984	42903.3	57068.2	53858.8	30655.1	31250.8	62713.1	64284.5	50033.9
6-Methyl-5-hepten-2-one propyleneglycol acetal		HMDB0032404	109257	NA	NA	309034	320740	293821	269294	217104	283689	311343	362226	288594	268578	271059	298196	265667	311945	376786	205478	259773	331045	247427	291458	327829	265874	391031	354682	286991	228648	301005	247328	305922	248143	192236	79297.4	74478.3	86984.4	87988.8	61451.4	63170	86007.9	65822.3	57758.6	138894	79557.3	69502.4	59403.4
6-Octenal		HMDB0039769	21158617	NA	NA	69843.6	78615.2	63940	66103.5	62192.9	55711	65202.7	80624	91736.6	102287	50228.8	65130.9	58881.1	62038.8	69958.4	29119.2	39570	55943.8	39152.8	67235.7	53858	44080.1	80048	64278.9	39105.8	43593.3	87947.1	53212.1	54701.4	51159.3	48326.9	56044.6	31629.5	61795.2	44705.4	41984	42903.3	57068.2	53858.8	30655.1	31250.8	62713.1	64284.5	50033.9
6-Pentadecylsalicylic acid		HMDB0029683	167551	2696	C10759	41344.9	19159.3	31558.4	27883	15178.7	18203.1	15577.1	16826.5	21592.5	20443.4	19464.2	17741.3	14967.5	6433.65	16342.9	14025.7	11036	8574.81	11596.2	13211.8	16119.3	10234.5	15321.5	24283.8	17408	14909.2	13869.6	14287.8	28649.7	12632.1	12782.3	14619.1	22636.3	25120.1	29442.2	28276.2	30854	22018	30236.8	26892.1	23258	28031.5	20553.2	18834.8
6-Pentyl-1,4-dioxan-2-one		HMDB0059937	71587348	NA	NA	1.10711e+06	1.31182e+06	1.11279e+06	1.0609e+06	708269	1.0635e+06	1.11293e+06	948679	1.34083e+06	1088378	1344857	1.07417e+06	975406	1193672	1.47277e+06	915421	799650	1.07559e+06	1.04515e+06	998577	1.14729e+06	1093040	1683246	1.22389e+06	826318	878308	1.16112e+06	990792	1.11744e+06	898486	894253	701173	398265	415068	533082	456364	548269	788674	363725	311804	545263	401831	661026	358165
6-Pentyl-2H-pyran-2-one		HMDB0031085	33960	66729	NA	125608	137869	162940	113897	69438.4	111236	117134	113408	198233	166327	113129	95501.3	111009	147315	107696	60184.6	127233	122066	126081	85493.6	102991	85812.9	142585	174777	76043.9	70660.7	81507.4	79837	108682	119309	97758.3	119131	165126	126387	117883	174560	128250	242214	153779	147094	177844	156160	190980	161819
7,7-Diethoxy-3-heptene		HMDB0038267	5369371	NA	NA	1.69237e+06	2.03593e+06	1.91863e+06	1.48279e+06	1.27121e+06	1.57707e+06	2.09075e+06	1.89838e+06	1.92771e+06	1.75543e+06	1.51771e+06	1.82407e+06	1.44055e+06	1.84583e+06	2.4127e+06	1.11724e+06	1521156	2.04302e+06	1609977	1.77459e+06	2.2223e+06	1.56491e+06	2.2154e+06	1.98399e+06	1.73029e+06	1.23412e+06	1.65599e+06	1.2052e+06	1.69875e+06	1.35488e+06	1.21874e+06	298319	420139	511203	302649	268375	350309	670715	291895	289214	395764	515219	399649	605233
7-Hydroxy-3,7-dimethyloctanal		HMDB0031739	7888	53459	NA	9949007	11504798	11419062	9327990	7611035	10557322	12258934	11924596	11121203	10087879	8976714	11839756	8963184	10683619	14898223	6.08635e+06	9378611	12510601	10533930	10980307	12879971	9452784	13969028	11505806	9738459	7.43292e+06	9378756	7251482	9339049	8226159	6.97687e+06	2.77864e+06	3.51156e+06	5.40678e+06	3.36879e+06	2.54327e+06	3.71239e+06	5.53706e+06	3.01635e+06	2.83467e+06	3.79552e+06	4814188	3.59266e+06	5.48434e+06
8-(5-hexyl-furan-2-yl)-octanoic acid		HMDB0112099	395943	34491	C13798	109803	68765.2	152432	103728	96054.6	105065	184247	175878	152240	131321	111445	172128	165379	151450	127642	155512	119241	140214	114824	115476	180514	167263	118973	137815	118296	326696	181050	88933.3	171286	156978	63798.6	68099.2	46489.8	85053.5	80878.2	80988	69600.5	78959.3	64104.3	49585	127516	62877.4	111900	89391.9
8-Hydroxy-5,6-octadienoic acid		HMDB0031101	54042244	NA	NA	90713.6	85550.6	96104.9	96498.1	74596.7	78442.8	75442.9	104027	107031	86219	65845.1	61371.6	93567.2	88334.1	75885.8	49881	85430.3	93453	56853.1	71591.5	83795.8	64176.5	100802	82837.3	64735.7	49117.2	74463.1	62620.1	91867.1	61130.1	62737.9	64536.4	53851.2	80269.2	59658.9	62449.7	55737.9	70239.4	54827.8	56466.8	60658.1	83705	73238.7	71776.7
8-Methylnonenoate	identified	HMDB0012183	5365959	NA	C18202	403094	487353	495635	440662	329030	444513	463203	477301	503970	457144	413035	485976	370373	462660	608536	244537	382065	482415	408085	507728	526754	430094	599832	514565	407043	323168	416666	333202	431254	339426	338844	164164	125509	173980	161805	126286	154237	207961	131391	130946	231210	181746	183962	171513
8-Ocimenyl acetate		HMDB0039685	54275943	NA	NA	151667	125457	146408	122789	85130.3	115858	128881	98168.7	137868	129400	123148	102185	100871	126715	165295	93591.6	127904	128741	103532	117243	106050	126700	150913	131959	106466	83258.6	100243	96871.8	137405	128675	94347.1	95805.1	88245.5	50123.4	85965.7	102175	92384.1	103824	63369.8	133098	138871	97121	80252.8	93801.3
9-Decenoic acid		HMDB0031003	61743	32381	NA	403094	487353	495635	440662	329030	444513	463203	477301	503970	457144	413035	485976	370373	462660	608536	244537	382065	482415	408085	507728	526754	430094	599832	514565	407043	323168	416666	333202	431254	339426	338844	164164	125509	173980	161805	126286	154237	207961	131391	130946	231210	181746	183962	171513
9-HOTE		HMDB0010224	53480359	88438	NA	109803	68765.2	152432	103728	96054.6	105065	184247	175878	152240	131321	111445	172128	165379	151450	127642	155512	119241	140214	114824	115476	180514	167263	118973	137815	118296	326696	181050	88933.3	171286	156978	63798.6	68099.2	46489.8	85053.5	80878.2	80988	69600.5	78959.3	64104.3	49585	127516	62877.4	111900	89391.9
9-Hydroxygeraniol		HMDB0038744	13619433	NA	NA	403094	487353	495635	440662	329030	444513	463203	477301	503970	457144	413035	485976	370373	462660	608536	244537	382065	482415	408085	507728	526754	430094	599832	514565	407043	323168	416666	333202	431254	339426	338844	164164	125509	173980	161805	126286	154237	207961	131391	130946	231210	181746	183962	171513
9-oxo-nonanoic acid	identified	HMDB0094711	75704	78700	C16322	1.10711e+06	1.31182e+06	1.11279e+06	1.0609e+06	708269	1.0635e+06	1.11293e+06	948679	1.34083e+06	1088378	1344857	1.07417e+06	975406	1193672	1.47277e+06	915421	799650	1.07559e+06	1.04515e+06	998577	1.14729e+06	1093040	1683246	1.22389e+06	826318	878308	1.16112e+06	990792	1.11744e+06	898486	894253	701173	398265	415068	533082	456364	548269	788674	363725	311804	545263	401831	661026	358165
9-OxoODE		HMDB0004669	9839084	72842	C14766	109803	68765.2	152432	103728	96054.6	105065	184247	175878	152240	131321	111445	172128	165379	151450	127642	155512	119241	140214	114824	115476	180514	167263	118973	137815	118296	326696	181050	88933.3	171286	156978	63798.6	68099.2	46489.8	85053.5	80878.2	80988	69600.5	78959.3	64104.3	49585	127516	62877.4	111900	89391.9
Abscisic alcohol		HMDB0039635	13629031	NA	NA	79405.7	77014.7	64615.2	39276.2	49065.4	71669	52334.1	48857.7	65720.5	61057.7	61368.5	54725.2	46640.6	60385.6	62399.3	32300.1	52296	59950.6	39955.8	50356.4	52315.6	48547.6	48548.1	67934.1	40279.2	36668	51899.8	50269.3	52144.6	43672.2	42031.2	41954.3	45226.5	30687.1	34369.8	24898.6	24785	43373.5	26671.4	27065.9	34819.1	37909.8	39824.1	33989.1
Acetaldehyde 1,3-octanediol acetal		HMDB0032155	11105826	NA	NA	9949007	11504798	11419062	9327990	7611035	10557322	12258934	11924596	11121203	10087879	8976714	11839756	8963184	10683619	14898223	6.08635e+06	9378611	12510601	10533930	10980307	12879971	9452784	13969028	11505806	9738459	7.43292e+06	9378756	7251482	9339049	8226159	6.97687e+06	2.77864e+06	3.51156e+06	5.40678e+06	3.36879e+06	2.54327e+06	3.71239e+06	5.53706e+06	3.01635e+06	2.83467e+06	3.79552e+06	4814188	3.59266e+06	5.48434e+06
Acetyl tributyl citrate		HMDB0034159	6505	NA	NA	369748	882842	339387	291387	174704	611141	553035	373181	442160	684664	842826	438653	269407	662543	462171	417883	379637	436750	507695	455263	368437	924958	530469	423639	385347	584660	535100	501750	788428	339755	182420	261269	58093.8	63122.2	47684.5	73163.7	137021	87393	5950.35	119203	18335.1	82063	115786	6012.11
Alanylglycine		HMDB0006899	6998028	73757	NA	55257060	53648564	53929864	78011128	51703016	72669704	59772820	62329452	55746040	59579548	51811356	69629464	76732384	65521884	60568116	63454836	46855756	54225856	67569288	50618444	45576736	47444200	49263852	78622064	62380264	71422112	67128024	79004896	60695680	47414028	65589332	71586784	62982020	49129308	46691176	44611148	52194284	42311788	56477280	56484144	58263440	46946964	56083036	57669604
Allicin		HMDB0033963	65036	28411	C07600	90224.3	110289	61834.4	123772	11589.2	12202.8	0	8193.57	152282	143721	86859.8	9591.59	0	93395	4968.92	7965.91	32118.4	21436.8	14920.3	12434.9	77559.7	55105.8	46758.2	72776	14230.9	0	0	0	68321.9	0	6327.29	51453.3	119228	137478	114246	71652.3	73472.2	76688.2	235085	110517	134151	133271	109896	155037
Allixin		HMDB0040705	86374	NA	NA	69217.1	70419.5	107646	48752.8	36231.2	98440	62805	60927.6	116517	91033.1	56001.8	59902.5	53902.8	88337.4	74312.3	47243.1	54565.5	64141.9	57168.2	41230.7	62245.6	67450.5	82077.9	92270.6	47377.1	51627.3	44674.5	47997.7	119314	55242.9	48437	146837	117769	74667.4	115521	196595	104639	213329	113231	85827.8	149025	76052.8	321632	74675.2
Allose		HMDB0001151	12285879	37741	C01487	1540254	1.67919e+06	1.9796e+06	1825421	1.95816e+06	1.82696e+06	1.61079e+06	1.76032e+06	1.97601e+06	1.662e+06	1.72949e+06	1.70587e+06	1.84115e+06	2.77634e+06	1564488	1714890	1.31061e+06	1.01264e+06	1.48834e+06	1075626	1.55374e+06	1.28646e+06	1.225e+06	1.78276e+06	1.41583e+06	2.08046e+06	2179152	1832286	1.87681e+06	1.84927e+06	1.47229e+06	1.51973e+06	2.01794e+06	1.53132e+06	1.44439e+06	1.92226e+06	1.61617e+06	1810911	1.67998e+06	1.90648e+06	1.66314e+06	1.67312e+06	1.5588e+06	1.882e+06
Allyl crotonate		HMDB0032067	92337821	NA	NA	44527.8	38993	49939.9	33315.1	36861	39517.2	29847.9	28948.7	34893.1	51301.7	36034.5	31718.3	32598.4	41186	37746.6	26228.5	30983.7	34968.3	28658.7	34442.3	38471.1	31565.1	37294	39566.7	44184.7	29332.1	37357.3	31230.4	31835.1	30813.1	29212.8	46181.9	49299.9	35719.4	54526.2	68550.1	49160.3	56809.8	51342.4	56083.4	55079.3	65128.9	51810.2	46301.8
Allyl cyclohexylacetate		HMDB0040595	22034852	NA	NA	62901	81140.9	63751.9	53882.4	39100.1	62278.2	74057.7	60978.1	56959.7	74157.6	67350.2	47522.9	57724.4	60781.4	106842	41259.9	61908	51837.9	39395.9	60619.9	48616.9	50778.8	65848.1	62783.6	39505.9	48705.6	49136.2	63438.6	65372.2	52545.7	48950.1	67099.3	101052	70110.2	69982.7	71691.4	87464.8	90415	71403.1	64993.5	88957	49645.8	96000.2	69621.5
Allyl propionate		HMDB0029487	61319	NA	NA	34268.5	41824.2	35106.6	33477.2	26908.6	25498.6	20700.8	25431.6	29058.4	54635.9	36317.1	21701.8	32713	30171.6	25063.2	24736.9	42240.8	34513.8	29363.7	21539.5	41238	27241.5	31996.4	38251.2	27664.1	28445.2	36077.6	29127.1	46560.4	25445.9	30581.6	48619.4	51196.1	43480.4	66593.1	114095	57434.8	130957	79610.3	40931.3	47211.8	52152.9	121125	54604.3
Allyl valerate		HMDB0032164	80606	NA	NA	83695.1	81917.4	77648.2	93430.8	73293.4	78218.4	68261.6	59883.3	90296.4	81380.4	70828.3	77336.6	97751.7	61165.1	67996.6	57721.5	53827.8	67794.3	54063.9	75450.4	74457.6	60976.8	80425.2	78154.1	69819.7	69619.7	68942.2	62732.9	85502.3	69160.2	69030.1	82340.9	77460.4	97448.3	74460.6	78421.1	63975.1	80083.7	69837.5	63781.6	79658	96205.2	84787.9	84959.9
alpha-12(13)-EpODE		HMDB0010200	16061061	88462	NA	109803	68765.2	152432	103728	96054.6	105065	184247	175878	152240	131321	111445	172128	165379	151450	127642	155512	119241	140214	114824	115476	180514	167263	118973	137815	118296	326696	181050	88933.3	171286	156978	63798.6	68099.2	46489.8	85053.5	80878.2	80988	69600.5	78959.3	64104.3	49585	127516	62877.4	111900	89391.9
alpha-9(10)-EpODE		HMDB0010220	16061060	88441	NA	109803	68765.2	152432	103728	96054.6	105065	184247	175878	152240	131321	111445	172128	165379	151450	127642	155512	119241	140214	114824	115476	180514	167263	118973	137815	118296	326696	181050	88933.3	171286	156978	63798.6	68099.2	46489.8	85053.5	80878.2	80988	69600.5	78959.3	64104.3	49585	127516	62877.4	111900	89391.9
alpha-Campholene acetate		HMDB0032193	61270	NA	NA	76362.4	90894.3	75547.2	68709.6	61595.6	78885	63850.5	79108	76052.9	78752.7	65333.5	63889.2	66364.3	84609.9	92349.7	44671.4	65743.4	80538.1	56871.4	62028.6	70401.1	53480.2	83910.6	71551.6	58390.6	36650.1	65737.9	57321.8	69636.9	59518	58123.4	29197.2	20682.8	28552	27393	19356.9	29384.6	34331.1	25908.6	27730.2	33053.5	27211.6	33980.7	23951.8
alpha-Carboxy-delta-decalactone		HMDB0030985	131751112	NA	NA	60719.4	38525.9	53797.3	48507.5	50330.1	50617.5	63403.1	47744.4	54002.6	47361.8	48124.3	47101.7	37147.1	43107.2	55953.4	32863.9	33222.7	53820	36715.6	52124.4	50090.9	56088.4	68338.5	57104.9	43013.9	29355.5	56470	39191.8	39084.1	42446.8	43942.7	35391.1	26902.8	33376.4	38208.5	44323	28739.6	53318.6	33775.3	26542.4	33828.2	39253	49728.5	24020.6
Alpha-CEHC		HMDB0001518	9943542	626842	NA	140551	150211	181075	155996	119656	135240	263915	117564	126307	137773	104935	121300	118729	138087	112620	98838.2	125480	131372	133774	117190	146438	116105	114124	130025	110114	93357.9	151723	115094	171804	98917.7	121241	113785	162176	204584	122427	124844	140483	297092	199355	212515	200406	259873	149136	183126
alpha-D-Galactose		HMDB0000143	439357	28061	C00984	1540254	1.67919e+06	1.9796e+06	1825421	1.95816e+06	1.82696e+06	1.61079e+06	1.76032e+06	1.97601e+06	1.662e+06	1.72949e+06	1.70587e+06	1.84115e+06	2.77634e+06	1564488	1714890	1.31061e+06	1.01264e+06	1.48834e+06	1075626	1.55374e+06	1.28646e+06	1.225e+06	1.78276e+06	1.41583e+06	2.08046e+06	2179152	1832286	1.87681e+06	1.84927e+06	1.47229e+06	1.51973e+06	2.01794e+06	1.53132e+06	1.44439e+06	1.92226e+06	1.61617e+06	1810911	1.67998e+06	1.90648e+06	1.66314e+06	1.67312e+06	1.5588e+06	1.882e+06
Alpha-D-Glucopyranoside		HMDB0061922	6560213	37744	NA	1540254	1.67919e+06	1.9796e+06	1825421	1.95816e+06	1.82696e+06	1.61079e+06	1.76032e+06	1.97601e+06	1.662e+06	1.72949e+06	1.70587e+06	1.84115e+06	2.77634e+06	1564488	1714890	1.31061e+06	1.01264e+06	1.48834e+06	1075626	1.55374e+06	1.28646e+06	1.225e+06	1.78276e+06	1.41583e+06	2.08046e+06	2179152	1832286	1.87681e+06	1.84927e+06	1.47229e+06	1.51973e+06	2.01794e+06	1.53132e+06	1.44439e+06	1.92226e+06	1.61617e+06	1810911	1.67998e+06	1.90648e+06	1.66314e+06	1.67312e+06	1.5588e+06	1.882e+06
alpha-D-Glucose		HMDB0003345	79025	17925	C00267	1540254	1.67919e+06	1.9796e+06	1825421	1.95816e+06	1.82696e+06	1.61079e+06	1.76032e+06	1.97601e+06	1.662e+06	1.72949e+06	1.70587e+06	1.84115e+06	2.77634e+06	1564488	1714890	1.31061e+06	1.01264e+06	1.48834e+06	1075626	1.55374e+06	1.28646e+06	1.225e+06	1.78276e+06	1.41583e+06	2.08046e+06	2179152	1832286	1.87681e+06	1.84927e+06	1.47229e+06	1.51973e+06	2.01794e+06	1.53132e+06	1.44439e+06	1.92226e+06	1.61617e+06	1810911	1.67998e+06	1.90648e+06	1.66314e+06	1.67312e+06	1.5588e+06	1.882e+06
Alpha-Ketooctanoic acid		HMDB0013211	67600	NA	NA	725537	909899	730622	661799	538843	590477	709836	769860	872325	735692	576060	751613	629733	809478	873124	356186	678111	785050	609766	585886	755381	538295	714600	879770	470162	443530	632329	476894	687153	645897	543934	629235	455056	444668	450805	589883	435334	799372	417877	411818	597636	414990	858311	421107
alpha-L-Sorbopyranose		HMDB0001266	441484	10295	C08356	1540254	1.67919e+06	1.9796e+06	1825421	1.95816e+06	1.82696e+06	1.61079e+06	1.76032e+06	1.97601e+06	1.662e+06	1.72949e+06	1.70587e+06	1.84115e+06	2.77634e+06	1564488	1714890	1.31061e+06	1.01264e+06	1.48834e+06	1075626	1.55374e+06	1.28646e+06	1.225e+06	1.78276e+06	1.41583e+06	2.08046e+06	2179152	1832286	1.87681e+06	1.84927e+06	1.47229e+06	1.51973e+06	2.01794e+06	1.53132e+06	1.44439e+06	1.92226e+06	1.61617e+06	1810911	1.67998e+06	1.90648e+06	1.66314e+06	1.67312e+06	1.5588e+06	1.882e+06
alpha-Methyl-2-furanacrolein		HMDB0038176	6210220	NA	NA	68708.7	43528.7	48824.3	60176.8	52616.3	44124.8	56966.1	53439.2	87107.1	48783.8	38835.6	67959.7	41229.5	70931.5	102748	35358.7	59270.8	75816.7	48448.1	51040.8	47556.7	48478.1	70897.2	80392.3	44660.4	42313.2	64034.5	50219.4	82217.8	60804.1	53950.5	44770.6	35554.1	42831.3	32625.2	34227.4	42066.8	40043.4	40433.9	37215.5	34516.2	53182.6	56201.9	46961.7
alpha-Teresantalic acid		HMDB0034922	5321816	NA	NA	125608	137869	162940	113897	69438.4	111236	117134	113408	198233	166327	113129	95501.3	111009	147315	107696	60184.6	127233	122066	126081	85493.6	102991	85812.9	142585	174777	76043.9	70660.7	81507.4	79837	108682	119309	97758.3	119131	165126	126387	117883	174560	128250	242214	153779	147094	177844	156160	190980	161819
alpha-Terpineol formate		HMDB0032050	16537	NA	NA	62901	81140.9	63751.9	53882.4	39100.1	62278.2	74057.7	60978.1	56959.7	74157.6	67350.2	47522.9	57724.4	60781.4	106842	41259.9	61908	51837.9	39395.9	60619.9	48616.9	50778.8	65848.1	62783.6	39505.9	48705.6	49136.2	63438.6	65372.2	52545.7	48950.1	67099.3	101052	70110.2	69982.7	71691.4	87464.8	90415	71403.1	64993.5	88957	49645.8	96000.2	69621.5
Amyl 2-furoate		HMDB0029456	74008	NA	NA	115416	144676	117828	104242	72557.4	95585.6	98858.4	106646	173135	127044	115271	98442.7	116451	123768	114062	95435.7	103775	105280	104626	92420.2	115607	107699	125763	130080	103867	97847.6	106182	104907	128308	110472	101730	139555	249063	102972	151890	196520	177543	188691	128255	167549	180954	140185	129642	146301
Amyl salicylate		HMDB0038604	16299	NA	NA	45176	45628.5	51174	34194	22415.2	39135.1	26801.2	24636.3	51815.2	50444.6	31284.9	41873.3	35140.4	29461.5	47013	20175.3	37899.1	26876.7	29734.7	20121.4	28143	43389.1	50165.4	39652.5	30522.9	30218.9	27476.8	26820.2	48262.9	25679.8	29160.9	62292.7	47120.5	31420	45543.4	82195.1	40295.9	108252	45469.3	33411.6	79106	53372.2	123836	40799.1
Aprobarbital		HMDB0015441	6464	2791	C07826	72514.2	70168	66510.8	54339.8	75734	51972.1	36187.1	49545.2	83478.8	64603.5	66491.6	57480.5	64318.9	42272.2	53696.2	56797.6	75178.5	68642.5	58511.3	43345.5	68413.1	65088.6	54733.5	71637.4	53733.2	32960.8	41728	58077.7	66976.4	41466.7	52974	41110.2	45235.1	51364.1	48751.1	52080.2	35432	42462.7	46166.6	41849.9	66516.1	50217.8	47882.2	47795
Arecaidine		HMDB0030352	10355	226311	C10128	183117	228304	250962	145830	172375	217855	170068	141584	188549	199454	320969	193350	196743	117289	190862	144335	368675	307007	155061	183924	182832	296369	230290	360747	244145	316855	155806	166622	343111	195753	217689	356610	218597	251507	384179	342404	368598	519129	273617	379229	273384	245825	400778	255455
Arecoline		HMDB0030353	2230	2814	C10129	814038	742615	642688	101175	1.01246e+06	709422	830326	384126	137676	180084	112904	265246	972561	122084	766005	353113	230863	327673	314608	287050	187531	461832	180880	323935	829289	670010	473665	929449	872964	260560	402049	686852	106311	155997	587262	900835	1.46281e+06	473965	1.01808e+06	1.28431e+06	521771	154185	90411.6	98654.7
Artemether		HMDB0015643	68911	195280	NA	290121	236343	317044	288914	319117	324373	302789	401448	362012	284614	253216	230070	223558	390775	449251	228082	384391	335041	238942	260421	311562	369025	540246	369486	321056	211372	272010	201838	352972	334167	369157	62478.9	50715.4	0	82079.2	49215.9	20860.4	0	0	0	56476.9	77324.4	0	0
Artemisia alcohol acetate		HMDB0036048	524254	NA	NA	76362.4	90894.3	75547.2	68709.6	61595.6	78885	63850.5	79108	76052.9	78752.7	65333.5	63889.2	66364.3	84609.9	92349.7	44671.4	65743.4	80538.1	56871.4	62028.6	70401.1	53480.2	83910.6	71551.6	58390.6	36650.1	65737.9	57321.8	69636.9	59518	58123.4	29197.2	20682.8	28552	27393	19356.9	29384.6	34331.1	25908.6	27730.2	33053.5	27211.6	33980.7	23951.8
Aspartate		HMDB0000191	5960	17053	C00049	632735	564122	519210	637544	549731	1.16164e+06	838184	513550	687166	554687	482012	628610	701253	506071	770812	635159	890814	1.20164e+06	672304	2.03419e+06	301048	358530	1.77295e+06	806614	559267	291793	324420	571043	690409	539748	493478	587304	386626	671088	655658	504076	591204	449584	612634	438724	391431	425402	533007	492518
Azelaic acid		HMDB0000784	2266	48131	C08261	294161	292649	362573	312789	276612	353848	272464	259481	393119	293483	319734	351261	262288	349839	349010	166447	311050	322700	255503	271450	308555	225864	365407	437670	201540	246329	290636	247008	347563	270861	236362	197998	171490	187606	135506	174254	170424	241181	161755	196161	279967	248208	281390	219395
Benzenebutanoic acid		HMDB0000543	4775	41500	NA	319857	360362	339209	294864	228467	318225	320920	294556	366724	307306	281947	314430	291533	318799	391287	246331	823553	543953	325456	761641	329494	277535	871394	326916	267529	187581	292959	203942	315391	243716	205839	82776.2	110117	97077.6	225574	51406.6	43058.9	110897	113319	57713.3	64605.6	159978	94811.4	64758.7
Benzyl propionate		HMDB0030063	31219	NA	NA	319857	360362	339209	294864	228467	318225	320920	294556	366724	307306	281947	314430	291533	318799	391287	246331	823553	543953	325456	761641	329494	277535	871394	326916	267529	187581	292959	203942	315391	243716	205839	82776.2	110117	97077.6	225574	51406.6	43058.9	110897	113319	57713.3	64605.6	159978	94811.4	64758.7
Benzylformate		HMDB0000209	999	30745	C07086	68708.7	43528.7	48824.3	60176.8	52616.3	44124.8	56966.1	53439.2	87107.1	48783.8	38835.6	67959.7	41229.5	70931.5	102748	35358.7	59270.8	75816.7	48448.1	51040.8	47556.7	48478.1	70897.2	80392.3	44660.4	42313.2	64034.5	50219.4	82217.8	60804.1	53950.5	44770.6	35554.1	42831.3	32625.2	34227.4	42066.8	40043.4	40433.9	37215.5	34516.2	53182.6	56201.9	46961.7
beta-Asarone		HMDB0029872	636750	NA	C17821	45176	45628.5	51174	34194	22415.2	39135.1	26801.2	24636.3	51815.2	50444.6	31284.9	41873.3	35140.4	29461.5	47013	20175.3	37899.1	26876.7	29734.7	20121.4	28143	43389.1	50165.4	39652.5	30522.9	30218.9	27476.8	26820.2	48262.9	25679.8	29160.9	62292.7	47120.5	31420	45543.4	82195.1	40295.9	108252	45469.3	33411.6	79106	53372.2	123836	40799.1
beta-D-Fructose		HMDB0000660	439709	28645	C02336	1540254	1.67919e+06	1.9796e+06	1825421	1.95816e+06	1.82696e+06	1.61079e+06	1.76032e+06	1.97601e+06	1.662e+06	1.72949e+06	1.70587e+06	1.84115e+06	2.77634e+06	1564488	1714890	1.31061e+06	1.01264e+06	1.48834e+06	1075626	1.55374e+06	1.28646e+06	1.225e+06	1.78276e+06	1.41583e+06	2.08046e+06	2179152	1832286	1.87681e+06	1.84927e+06	1.47229e+06	1.51973e+06	2.01794e+06	1.53132e+06	1.44439e+06	1.92226e+06	1.61617e+06	1810911	1.67998e+06	1.90648e+06	1.66314e+06	1.67312e+06	1.5588e+06	1.882e+06
Beta-D-Galactose		HMDB0003449	439353	27667	C00962	1540254	1.67919e+06	1.9796e+06	1825421	1.95816e+06	1.82696e+06	1.61079e+06	1.76032e+06	1.97601e+06	1.662e+06	1.72949e+06	1.70587e+06	1.84115e+06	2.77634e+06	1564488	1714890	1.31061e+06	1.01264e+06	1.48834e+06	1075626	1.55374e+06	1.28646e+06	1.225e+06	1.78276e+06	1.41583e+06	2.08046e+06	2179152	1832286	1.87681e+06	1.84927e+06	1.47229e+06	1.51973e+06	2.01794e+06	1.53132e+06	1.44439e+06	1.92226e+06	1.61617e+06	1810911	1.67998e+06	1.90648e+06	1.66314e+06	1.67312e+06	1.5588e+06	1.882e+06
beta-D-Glucose		HMDB0000516	64689	15903	C00221	1540254	1.67919e+06	1.9796e+06	1825421	1.95816e+06	1.82696e+06	1.61079e+06	1.76032e+06	1.97601e+06	1.662e+06	1.72949e+06	1.70587e+06	1.84115e+06	2.77634e+06	1564488	1714890	1.31061e+06	1.01264e+06	1.48834e+06	1075626	1.55374e+06	1.28646e+06	1.225e+06	1.78276e+06	1.41583e+06	2.08046e+06	2179152	1832286	1.87681e+06	1.84927e+06	1.47229e+06	1.51973e+06	2.01794e+06	1.53132e+06	1.44439e+06	1.92226e+06	1.61617e+06	1810911	1.67998e+06	1.90648e+06	1.66314e+06	1.67312e+06	1.5588e+06	1.882e+06
Betamipron		HMDB0034250	71651	NA	NA	6587127	4.16879e+06	6.30587e+06	7792590	4.18358e+06	1.74925e+06	5.40687e+06	3.61735e+06	11999195	11344791	9277816	5.75582e+06	2384798	2.46608e+06	5150483	3.46516e+06	13389025	4.71414e+06	3.93841e+06	4.68055e+06	7.57211e+06	5965610	3.18663e+06	7.46534e+06	2.5519e+06	2.15357e+06	2528101	2.98205e+06	2.38889e+06	5290917	5.17531e+06	4.40393e+06	6.08301e+06	7.02355e+06	4.0611e+06	1.88017e+06	3.30362e+06	2880879	5.28289e+06	3697161	4.27324e+06	8676850	17222070	7.97825e+06
beta-Thujaplicin		HMDB0035213	3611	10447	C09904	319857	360362	339209	294864	228467	318225	320920	294556	366724	307306	281947	314430	291533	318799	391287	246331	823553	543953	325456	761641	329494	277535	871394	326916	267529	187581	292959	203942	315391	243716	205839	82776.2	110117	97077.6	225574	51406.6	43058.9	110897	113319	57713.3	64605.6	159978	94811.4	64758.7
Blennin A		HMDB0031901	14109863	NA	NA	79405.7	77014.7	64615.2	39276.2	49065.4	71669	52334.1	48857.7	65720.5	61057.7	61368.5	54725.2	46640.6	60385.6	62399.3	32300.1	52296	59950.6	39955.8	50356.4	52315.6	48547.6	48548.1	67934.1	40279.2	36668	51899.8	50269.3	52144.6	43672.2	42031.2	41954.3	45226.5	30687.1	34369.8	24898.6	24785	43373.5	26671.4	27065.9	34819.1	37909.8	39824.1	33989.1
Bornyl formate		HMDB0038245	518472	NA	NA	62901	81140.9	63751.9	53882.4	39100.1	62278.2	74057.7	60978.1	56959.7	74157.6	67350.2	47522.9	57724.4	60781.4	106842	41259.9	61908	51837.9	39395.9	60619.9	48616.9	50778.8	65848.1	62783.6	39505.9	48705.6	49136.2	63438.6	65372.2	52545.7	48950.1	67099.3	101052	70110.2	69982.7	71691.4	87464.8	90415	71403.1	64993.5	88957	49645.8	96000.2	69621.5
Botryodiplodin		HMDB0036594	33701	NA	NA	507023	524647	577936	465538	644696	510851	624104	470573	607443	515979	399720	515329	483170	636778	591673	260767	621082	665849	483434	598172	526419	464794	694870	625573	380769	251253	431089	360144	495646	486602	410461	625458	886744	604284	566491	674107	531917	929207	560714	696493	707494	772478	954141	690575
Buccoxime		HMDB0036030	166450	NA	NA	22173.6	28588.2	36088.1	41721.1	26083	28621.8	35929.6	26325.3	44398.4	28047.7	57709	21199.7	32568.1	47395.6	47178.1	37037.6	39350.5	31557.2	43501.5	30107	29905.2	31201.5	40489.9	59699.5	27541.5	36362.4	20835.3	36348.1	36513.3	41101.9	62423.3	26936.2	28482.5	38131.6	18079.7	19509.9	22518	19080.5	29764.5	22112.7	20566.2	23980.3	32286.2	18213.7
Butabarbital	identified	HMDB0014382	2479	3228	C07827	154649	219438	156605	136987	128906	140994	187505	131328	166003	158379	125289	141301	171504	148251	153612	148837	140595	132605	133432	166590	138349	152252	168538	152610	130846	183072	141564	181289	93561.4	139178	144476	88527.4	98858.4	67604.6	68404	73801.7	76626.6	93153.7	63351.6	60565.4	86439.7	81069.4	90132.7	78081.6
Butan-2-one		HMDB0000474	6569	28398	C02845	48236.3	29350.7	33855.1	46118.4	32337.8	28957.8	41997.4	32439.3	37516.7	32582.6	32693	32609.9	43637.7	43428.7	49069.4	35845.1	36444.6	38893.8	29925.8	32008.9	25933.7	43836.3	36810.5	42137.4	28203.8	38745.5	50197.3	31346.9	41080.5	40564.2	41881.7	51791.2	56221.1	64225.4	64085.8	70667.8	52907.6	53664.1	45199.5	55208.6	67477.5	67772.4	53169.3	77638
Butanal		HMDB0003543	261	15743	C01412	48236.3	29350.7	33855.1	46118.4	32337.8	28957.8	41997.4	32439.3	37516.7	32582.6	32693	32609.9	43637.7	43428.7	49069.4	35845.1	36444.6	38893.8	29925.8	32008.9	25933.7	43836.3	36810.5	42137.4	28203.8	38745.5	50197.3	31346.9	41080.5	40564.2	41881.7	51791.2	56221.1	64225.4	64085.8	70667.8	52907.6	53664.1	45199.5	55208.6	67477.5	67772.4	53169.3	77638
Butethal		HMDB0015442	6473	519412	NA	154649	219438	156605	136987	128906	140994	187505	131328	166003	158379	125289	141301	171504	148251	153612	148837	140595	132605	133432	166590	138349	152252	168538	152610	130846	183072	141564	181289	93561.4	139178	144476	88527.4	98858.4	67604.6	68404	73801.7	76626.6	93153.7	63351.6	60565.4	86439.7	81069.4	90132.7	78081.6
Butoxyacetic acid		HMDB0041844	41958	NA	NA	325808	397432	341500	309214	236865	242158	333978	275568	467726	339154	344064	309472	264954	371445	366957	203836	334007	327211	252096	272780	307163	293697	376911	401865	202274	237681	257716	213396	309933	338272	241916	120140	114052	122455	107787	123662	93379.2	107378	98495.5	152286	166687	134491	124153	123728
butryl butyrate		HMDB0039620	7983	87429	NA	4954824	5.14197e+06	4.41919e+06	4.82049e+06	5765679	5892011	5.07004e+06	5464260	4797286	3.64796e+06	4.84736e+06	6130662	5.12007e+06	6475661	5.90411e+06	3081296	7.21951e+06	9157299	6169049	7.69341e+06	5.73703e+06	7005724	9996086	5.16342e+06	4.68692e+06	1.93052e+06	3824784	3377617	6.38554e+06	4767635	4082351	9323195	7.81657e+06	11156823	10348903	7223643	7.55598e+06	8117199	11308355	7875526	7821792	9446027	7832668	10037557
Butyl 2-methylbutanoate		HMDB0039216	61812	NA	NA	31059080	36333212	35153816	31346394	26063910	34265028	37671056	37614436	32756472	31222842	25990618	35452616	24216608	31566360	49759612	18183924	29314668	36772668	29634554	34388456	37593128	31483394	42794468	35495564	31823804	20526698	28560828	22274504	30226706	26423828	20904814	21439336	16472399	28092744	17140688	14065325	19779730	23878034	20280954	17347108	17172318	22708688	19138784	27444522
Butyl 3-hydroxy-2-methylidenebutanoate		HMDB0040202	568158	NA	NA	1.10711e+06	1.31182e+06	1.11279e+06	1.0609e+06	708269	1.0635e+06	1.11293e+06	948679	1.34083e+06	1088378	1344857	1.07417e+06	975406	1193672	1.47277e+06	915421	799650	1.07559e+06	1.04515e+06	998577	1.14729e+06	1093040	1683246	1.22389e+06	826318	878308	1.16112e+06	990792	1.11744e+06	898486	894253	701173	398265	415068	533082	456364	548269	788674	363725	311804	545263	401831	661026	358165
Butyl 3-methylbutanoate		HMDB0032042	7981	NA	NA	31059080	36333212	35153816	31346394	26063910	34265028	37671056	37614436	32756472	31222842	25990618	35452616	24216608	31566360	49759612	18183924	29314668	36772668	29634554	34388456	37593128	31483394	42794468	35495564	31823804	20526698	28560828	22274504	30226706	26423828	20904814	21439336	16472399	28092744	17140688	14065325	19779730	23878034	20280954	17347108	17172318	22708688	19138784	27444522
Butyl acetoacetate		HMDB0040447	11576	NA	NA	725537	909899	730622	661799	538843	590477	709836	769860	872325	735692	576060	751613	629733	809478	873124	356186	678111	785050	609766	585886	755381	538295	714600	879770	470162	443530	632329	476894	687153	645897	543934	629235	455056	444668	450805	589883	435334	799372	417877	411818	597636	414990	858311	421107
Butyl butyryllactate		HMDB0037137	24114	NA	NA	65470.1	65247.5	85628.4	80594.7	49898.8	74495.8	76700.8	87203.8	77129.2	66709.2	81365.1	75335.9	73570.8	61900.8	93745.1	47586.4	131221	88828.9	61533	93423.1	68261.2	64806.1	118835	90469.5	44580.5	63847.6	66107.7	59593.8	96776.1	62151.1	58705.9	48084.8	36357.4	61341.1	59254.2	41269.3	36157.3	55172.7	43961.6	41562	79883.7	65869.9	75718.2	43879.7
Butyl ethyl malonate		HMDB0036233	5140436	NA	NA	294161	292649	362573	312789	276612	353848	272464	259481	393119	293483	319734	351261	262288	349839	349010	166447	311050	322700	255503	271450	308555	225864	365407	437670	201540	246329	290636	247008	347563	270861	236362	197998	171490	187606	135506	174254	170424	241181	161755	196161	279967	248208	281390	219395
Butyl heptanoate		HMDB0041559	21596	NA	NA	1.69237e+06	2.03593e+06	1.91863e+06	1.48279e+06	1.27121e+06	1.57707e+06	2.09075e+06	1.89838e+06	1.92771e+06	1.75543e+06	1.51771e+06	1.82407e+06	1.44055e+06	1.84583e+06	2.4127e+06	1.11724e+06	1521156	2.04302e+06	1609977	1.77459e+06	2.2223e+06	1.56491e+06	2.2154e+06	1.98399e+06	1.73029e+06	1.23412e+06	1.65599e+06	1.2052e+06	1.69875e+06	1.35488e+06	1.21874e+06	298319	420139	511203	302649	268375	350309	670715	291895	289214	395764	515219	399649	605233
butyl hexanoate		HMDB0040211	12294	89561	NA	9949007	11504798	11419062	9327990	7611035	10557322	12258934	11924596	11121203	10087879	8976714	11839756	8963184	10683619	14898223	6.08635e+06	9378611	12510601	10533930	10980307	12879971	9452784	13969028	11505806	9738459	7.43292e+06	9378756	7251482	9339049	8226159	6.97687e+06	2.77864e+06	3.51156e+06	5.40678e+06	3.36879e+06	2.54327e+06	3.71239e+06	5.53706e+06	3.01635e+06	2.83467e+06	3.79552e+06	4814188	3.59266e+06	5.48434e+06
Butyl isobutyrate		HMDB0040251	7353	NA	NA	4954824	5.14197e+06	4.41919e+06	4.82049e+06	5765679	5892011	5.07004e+06	5464260	4797286	3.64796e+06	4.84736e+06	6130662	5.12007e+06	6475661	5.90411e+06	3081296	7.21951e+06	9157299	6169049	7.69341e+06	5.73703e+06	7005724	9996086	5.16342e+06	4.68692e+06	1.93052e+06	3824784	3377617	6.38554e+06	4767635	4082351	9323195	7.81657e+06	11156823	10348903	7223643	7.55598e+06	8117199	11308355	7875526	7821792	9446027	7832668	10037557
Butyl lactate		HMDB0040254	8738	NA	NA	178947	202640	177959	176880	112816	173479	219725	161563	273277	189127	228650	213593	210229	253332	274963	144766	244540	305105	161519	164374	199030	155352	294460	262924	137640	124669	141467	154233	156235	127113	184856	169043	156628	223479	188211	157163	138707	215150	175326	123081	144756	155229	166353	204260
Butyl levulinate		HMDB0040165	16331	NA	NA	1.10711e+06	1.31182e+06	1.11279e+06	1.0609e+06	708269	1.0635e+06	1.11293e+06	948679	1.34083e+06	1088378	1344857	1.07417e+06	975406	1193672	1.47277e+06	915421	799650	1.07559e+06	1.04515e+06	998577	1.14729e+06	1093040	1683246	1.22389e+06	826318	878308	1.16112e+06	990792	1.11744e+06	898486	894253	701173	398265	415068	533082	456364	548269	788674	363725	311804	545263	401831	661026	358165
Butyl pentanoate		HMDB0040295	61137	89761	NA	31059080	36333212	35153816	31346394	26063910	34265028	37671056	37614436	32756472	31222842	25990618	35452616	24216608	31566360	49759612	18183924	29314668	36772668	29634554	34388456	37593128	31483394	42794468	35495564	31823804	20526698	28560828	22274504	30226706	26423828	20904814	21439336	16472399	28092744	17140688	14065325	19779730	23878034	20280954	17347108	17172318	22708688	19138784	27444522
Butyl propionate		HMDB0030052	11529	NA	NA	1932490	2.05705e+06	1.87968e+06	1.95561e+06	1428820	2018299	2321765	2.21171e+06	2.18895e+06	1.55261e+06	1.65363e+06	2.01794e+06	1.6277e+06	1.92967e+06	2949656	1.03395e+06	1.80162e+06	2.40727e+06	1.94378e+06	2.37845e+06	1.89925e+06	1.93736e+06	2.65658e+06	2244925	1.91416e+06	936736	1.58099e+06	1.48376e+06	1.76527e+06	1.55873e+06	1486326	2.97911e+06	2547794	4.40414e+06	3.04848e+06	2.59234e+06	2801523	2935630	3807720	2620054	2618856	3.38579e+06	3001957	3.93279e+06
Butyric acid		HMDB0000039	264	30772	C00246	1.81681e+06	3.93966e+06	3.59409e+06	2.58079e+06	5230106	3.68656e+06	3.15884e+06	8167922	4.58022e+06	1954573	2.92624e+06	4.00314e+06	3389748	3132904	2582963	9731120	10018303	5151012	6330369	3845188	2.88542e+06	4.81403e+06	6.51737e+06	4.97457e+06	3.19513e+06	1.70177e+06	1.55845e+06	1.46756e+06	3.25844e+06	3548256	4.26544e+06	2.62526e+06	1.84804e+06	2.4178e+06	4.01632e+06	1.97717e+06	1.1697e+06	2.51153e+06	2.17896e+06	2.37436e+06	2.21259e+06	4.11471e+06	3.60204e+06	1.77517e+06
Cadabicilone		HMDB0037559	325292	NA	NA	79405.7	77014.7	64615.2	39276.2	49065.4	71669	52334.1	48857.7	65720.5	61057.7	61368.5	54725.2	46640.6	60385.6	62399.3	32300.1	52296	59950.6	39955.8	50356.4	52315.6	48547.6	48548.1	67934.1	40279.2	36668	51899.8	50269.3	52144.6	43672.2	42031.2	41954.3	45226.5	30687.1	34369.8	24898.6	24785	43373.5	26671.4	27065.9	34819.1	37909.8	39824.1	33989.1
Capric acid	identified	HMDB0000511	2969	30813	C01571	9949007	11504798	11419062	9327990	7611035	10557322	12258934	11924596	11121203	10087879	8976714	11839756	8963184	10683619	14898223	6.08635e+06	9378611	12510601	10533930	10980307	12879971	9452784	13969028	11505806	9738459	7.43292e+06	9378756	7251482	9339049	8226159	6.97687e+06	2.77864e+06	3.51156e+06	5.40678e+06	3.36879e+06	2.54327e+06	3.71239e+06	5.53706e+06	3.01635e+06	2.83467e+06	3.79552e+06	4814188	3.59266e+06	5.48434e+06
Caproaldehyde		HMDB0005994	6184	88528	C02373	68246.8	83025.3	90228.6	82355.9	60371	52449.1	65304.2	57858.9	73487.2	61006.2	63588.6	72858.2	68669.2	66007.4	80947.1	43598.9	51475	60406.7	59755.3	74676.6	64620.4	56799.2	82646.3	83299.2	57985.2	33929.2	55306.2	56844.3	73361	64224.9	68825.9	47325.6	47134.3	59048.8	58439	46417.4	50584.9	58185.1	45011.6	42323.3	47624.8	60008.5	61950.2	49526.8
Caproic acid		HMDB0000535	8892	30776	C01585	2.28202e+06	2.44802e+06	2.67102e+06	2.37729e+06	1.93155e+06	2.6323e+06	2.47014e+06	2.29271e+06	2.73045e+06	2.28869e+06	1.81642e+06	2.91286e+06	2123246	2.36444e+06	3.60295e+06	1.21265e+06	2.30287e+06	2725161	2.07744e+06	2.60667e+06	2.36361e+06	2.30766e+06	2.52162e+06	2.78959e+06	2.28737e+06	1.12185e+06	2.00102e+06	1.85176e+06	2.33975e+06	2.17494e+06	1.74504e+06	5.44662e+06	5.28788e+06	8102586	5.45059e+06	5136677	5261508	5.85648e+06	7194426	4609864	5.51374e+06	5.88861e+06	7103756	7120424
Caprylic acid	identified	HMDB0000482	379	28837	C06423	4954824	5.14197e+06	4.41919e+06	4.82049e+06	5765679	5892011	5.07004e+06	5464260	4797286	3.64796e+06	4.84736e+06	6130662	5.12007e+06	6475661	5.90411e+06	3081296	7.21951e+06	9157299	6169049	7.69341e+06	5.73703e+06	7005724	9996086	5.16342e+06	4.68692e+06	1.93052e+06	3824784	3377617	6.38554e+06	4767635	4082351	9323195	7.81657e+06	11156823	10348903	7223643	7.55598e+06	8117199	11308355	7875526	7821792	9446027	7832668	10037557
Carvyl acetate		HMDB0038046	7335	NA	NA	151667	125457	146408	122789	85130.3	115858	128881	98168.7	137868	129400	123148	102185	100871	126715	165295	93591.6	127904	128741	103532	117243	106050	126700	150913	131959	106466	83258.6	100243	96871.8	137405	128675	94347.1	95805.1	88245.5	50123.4	85965.7	102175	92384.1	103824	63369.8	133098	138871	97121	80252.8	93801.3
Cer(d18:1/16:0)		HMDB0004949	5283564	72959	C00195	115073	112101	158369	112712	66707.6	117559	109026	55019.9	94244.5	140835	114817	99181.4	146651	81756.2	106745	99444.1	63003.3	83140.8	52667.3	132390	74584.7	125858	104011	95401.7	111306	142383	135773	99949.2	185722	124468	113957	148115	105084	154304	92896.9	65033.5	134623	173826	117991	99933.8	93242.1	157777	105844	69982.4
Cholesterol sulfate		HMDB0000653	65076	41321	C18043	502512	418620	493681	506778	370348	422880	387125	191343	426269	384213	344690	366609	480710	366183	296770	212887	165525	230025	151171	316798	162854	177731	349693	471891	308264	169505	280608	337249	528916	366402	358482	514248	302194	681597	470341	407643	394264	553664	508159	378342	173213	655034	605644	433636
Choline	identified	HMDB0000097	305	15354	C00114	9687871	7.01417e+06	6953654	7.6342e+06	9254060	8620787	9557932	11486076	7.30725e+06	8970975	6.31791e+06	9212638	9631406	12707172	9136225	10464087	7792087	15722678	8647095	26491730	12970433	7.49246e+06	31653146	7.03919e+06	4.98701e+06	6.72271e+06	6.72327e+06	7038440	10177327	6945660	4803615	7.07902e+06	6.91919e+06	8717695	8774675	9275999	10863603	9113033	8333219	6652077	7646654	5767221	9098299	7.33274e+06
Cibulins		HMDB0030299	20514207	91018	NA	430853	555001	426838	516626	462962	380637	406072	453190	465662	541114	421327	489476	464922	491044	380802	403407	479595	609771	514575	365327	570494	453944	472089	534562	422684	482885	329822	364406	378305	453572	424328	499526	392630	401788	450877	406056	340083	452284	448935	376945	485059	389352	383595	486749
Ciclopirox		HMDB0015319	2749	453011	NA	32420.9	43280.4	26206.3	49080.1	20982.1	22069	26640.2	20776.8	50481.2	56027.7	53665.4	17431.4	28567	23165.1	34205.3	30951.5	25629	26219.5	24845.2	33385.4	20806.8	31960.3	34840.1	31967.8	26431.4	18950.6	21595.4	22393.1	30885.8	23951.7	23900.5	33052.4	40310.4	48553.1	59228.2	57792.9	54889.8	75622.8	46341.9	42194.2	34459.3	42431.4	113727	50714
cis- and trans-2-Isobutyl-4-methyl-1,3-dioxolane		HMDB0032203	86733	NA	NA	4954824	5.14197e+06	4.41919e+06	4.82049e+06	5765679	5892011	5.07004e+06	5464260	4797286	3.64796e+06	4.84736e+06	6130662	5.12007e+06	6475661	5.90411e+06	3081296	7.21951e+06	9157299	6169049	7.69341e+06	5.73703e+06	7005724	9996086	5.16342e+06	4.68692e+06	1.93052e+06	3824784	3377617	6.38554e+06	4767635	4082351	9323195	7.81657e+06	11156823	10348903	7223643	7.55598e+06	8117199	11308355	7875526	7821792	9446027	7832668	10037557
cis- and trans-2-Isopropyl-4-methyl-1,3-dioxolane		HMDB0032204	98461	NA	NA	1932490	2.05705e+06	1.87968e+06	1.95561e+06	1428820	2018299	2321765	2.21171e+06	2.18895e+06	1.55261e+06	1.65363e+06	2.01794e+06	1.6277e+06	1.92967e+06	2949656	1.03395e+06	1.80162e+06	2.40727e+06	1.94378e+06	2.37845e+06	1.89925e+06	1.93736e+06	2.65658e+06	2244925	1.91416e+06	936736	1.58099e+06	1.48376e+06	1.76527e+06	1.55873e+06	1486326	2.97911e+06	2547794	4.40414e+06	3.04848e+06	2.59234e+06	2801523	2935630	3807720	2620054	2618856	3.38579e+06	3001957	3.93279e+06
cis- and trans-Ethyl 2,4-dimethyl-1,3-dioxolane-2-acetate		HMDB0032200	95392	NA	NA	294161	292649	362573	312789	276612	353848	272464	259481	393119	293483	319734	351261	262288	349839	349010	166447	311050	322700	255503	271450	308555	225864	365407	437670	201540	246329	290636	247008	347563	270861	236362	197998	171490	187606	135506	174254	170424	241181	161755	196161	279967	248208	281390	219395
cis-3-Hexenyl 2-methylbutanoate		HMDB0038277	5365069	NA	NA	309034	320740	293821	269294	217104	283689	311343	362226	288594	268578	271059	298196	265667	311945	376786	205478	259773	331045	247427	291458	327829	265874	391031	354682	286991	228648	301005	247328	305922	248143	192236	79297.4	74478.3	86984.4	87988.8	61451.4	63170	86007.9	65822.3	57758.6	138894	79557.3	69502.4	59403.4
cis-3-Hexenyl cis-3-hexenoate		HMDB0038270	6435882	NA	NA	76362.4	90894.3	75547.2	68709.6	61595.6	78885	63850.5	79108	76052.9	78752.7	65333.5	63889.2	66364.3	84609.9	92349.7	44671.4	65743.4	80538.1	56871.4	62028.6	70401.1	53480.2	83910.6	71551.6	58390.6	36650.1	65737.9	57321.8	69636.9	59518	58123.4	29197.2	20682.8	28552	27393	19356.9	29384.6	34331.1	25908.6	27730.2	33053.5	27211.6	33980.7	23951.8
cis-3-Hexenyl lactate		HMDB0036213	5364231	NA	NA	1.10711e+06	1.31182e+06	1.11279e+06	1.0609e+06	708269	1.0635e+06	1.11293e+06	948679	1.34083e+06	1088378	1344857	1.07417e+06	975406	1193672	1.47277e+06	915421	799650	1.07559e+06	1.04515e+06	998577	1.14729e+06	1093040	1683246	1.22389e+06	826318	878308	1.16112e+06	990792	1.11744e+06	898486	894253	701173	398265	415068	533082	456364	548269	788674	363725	311804	545263	401831	661026	358165
cis-3-Hexenyl pentanoate		HMDB0031691	5367682	NA	NA	309034	320740	293821	269294	217104	283689	311343	362226	288594	268578	271059	298196	265667	311945	376786	205478	259773	331045	247427	291458	327829	265874	391031	354682	286991	228648	301005	247328	305922	248143	192236	79297.4	74478.3	86984.4	87988.8	61451.4	63170	86007.9	65822.3	57758.6	138894	79557.3	69502.4	59403.4
cis-3-Hexenyl pyruvate		HMDB0038276	5363291	NA	NA	302554	354477	262052	268904	170559	246317	335535	450457	348243	448720	255164	319404	201191	346643	259262	99367.5	204557	209415	261791	327670	347784	224269	419617	313412	217329	207293	494079	234294	247121	210951	207623	113756	116390	139035	121823	127864	93240.2	157852	116102	125438	161978	149628	173032	114397
cis-3-Hexenyl tiglate		HMDB0038279	15461361	NA	NA	62901	81140.9	63751.9	53882.4	39100.1	62278.2	74057.7	60978.1	56959.7	74157.6	67350.2	47522.9	57724.4	60781.4	106842	41259.9	61908	51837.9	39395.9	60619.9	48616.9	50778.8	65848.1	62783.6	39505.9	48705.6	49136.2	63438.6	65372.2	52545.7	48950.1	67099.3	101052	70110.2	69982.7	71691.4	87464.8	90415	71403.1	64993.5	88957	49645.8	96000.2	69621.5
cis-3-Hexenyl trans-2-hexenoate		HMDB0038280	5367679	NA	NA	76362.4	90894.3	75547.2	68709.6	61595.6	78885	63850.5	79108	76052.9	78752.7	65333.5	63889.2	66364.3	84609.9	92349.7	44671.4	65743.4	80538.1	56871.4	62028.6	70401.1	53480.2	83910.6	71551.6	58390.6	36650.1	65737.9	57321.8	69636.9	59518	58123.4	29197.2	20682.8	28552	27393	19356.9	29384.6	34331.1	25908.6	27730.2	33053.5	27211.6	33980.7	23951.8
cis-3-Hexenyl trans-4-hexenoate		HMDB0031692	129837271	NA	NA	76362.4	90894.3	75547.2	68709.6	61595.6	78885	63850.5	79108	76052.9	78752.7	65333.5	63889.2	66364.3	84609.9	92349.7	44671.4	65743.4	80538.1	56871.4	62028.6	70401.1	53480.2	83910.6	71551.6	58390.6	36650.1	65737.9	57321.8	69636.9	59518	58123.4	29197.2	20682.8	28552	27393	19356.9	29384.6	34331.1	25908.6	27730.2	33053.5	27211.6	33980.7	23951.8
cis-3-Octenyl propionate		HMDB0032453	20836326	NA	NA	309034	320740	293821	269294	217104	283689	311343	362226	288594	268578	271059	298196	265667	311945	376786	205478	259773	331045	247427	291458	327829	265874	391031	354682	286991	228648	301005	247328	305922	248143	192236	79297.4	74478.3	86984.4	87988.8	61451.4	63170	86007.9	65822.3	57758.6	138894	79557.3	69502.4	59403.4
cis-4-Hydroxycyclohexylacetic acid		HMDB0000451	12702257	89344	NA	725537	909899	730622	661799	538843	590477	709836	769860	872325	735692	576060	751613	629733	809478	873124	356186	678111	785050	609766	585886	755381	538295	714600	879770	470162	443530	632329	476894	687153	645897	543934	629235	455056	444668	450805	589883	435334	799372	417877	411818	597636	414990	858311	421107
Citronellic acid		HMDB0035837	10402	NA	C16462	403094	487353	495635	440662	329030	444513	463203	477301	503970	457144	413035	485976	370373	462660	608536	244537	382065	482415	408085	507728	526754	430094	599832	514565	407043	323168	416666	333202	431254	339426	338844	164164	125509	173980	161805	126286	154237	207961	131391	130946	231210	181746	183962	171513
Citronellyl formate		HMDB0033371	7778	NA	C12295	309034	320740	293821	269294	217104	283689	311343	362226	288594	268578	271059	298196	265667	311945	376786	205478	259773	331045	247427	291458	327829	265874	391031	354682	286991	228648	301005	247328	305922	248143	192236	79297.4	74478.3	86984.4	87988.8	61451.4	63170	86007.9	65822.3	57758.6	138894	79557.3	69502.4	59403.4
Cnidiol C		HMDB0035365	26396	NA	NA	403094	487353	495635	440662	329030	444513	463203	477301	503970	457144	413035	485976	370373	462660	608536	244537	382065	482415	408085	507728	526754	430094	599832	514565	407043	323168	416666	333202	431254	339426	338844	164164	125509	173980	161805	126286	154237	207961	131391	130946	231210	181746	183962	171513
Columbin		HMDB0036837	226036	NA	C17508	25088.2	28424.6	31842.8	25097.1	39484.9	31643.6	30465.5	44049.1	30460.6	25144.5	26152.2	26935.1	30084.8	28325	29504.2	43233.8	53112.1	44789.8	39069.8	53137.9	35706.9	35725.4	45762	25718.4	22948.8	37598	29005.2	22511.4	41954.9	25144.6	30681.8	28306.7	31779.5	31078.1	22328.9	39238.7	25044.3	22516.7	32336.8	35382.9	28293.2	29937.1	28883	32239.4
Conhydrinone		HMDB0033364	426124	NA	NA	52320.8	61739.3	101428	67150.9	60563.1	64199.4	67604.7	60784.1	70883.8	60191.7	93304.4	64410.6	52032.8	59532.5	89100.9	43664.7	75606.8	59970.1	60348.8	53988.4	61945.6	58399.6	77023.5	121753	47671.7	73549.5	58866.2	67264.2	75975.6	64832.2	48545.5	50179.4	55873.4	45179.2	39439.4	46051.3	42504.8	63464.7	45918.3	37959.7	59419.5	47484.8	76015.4	43499.8
Cuscohygrine		HMDB0030290	441070	27920	C06521	33012.6	30811.8	43165.3	34991	29369.5	40951.7	64066.2	47228.4	28804.6	25434.7	50197.1	49551.8	48093.9	35572.7	81142	55451.7	26933.7	30433.6	31138.6	34709.9	40050.9	42401.7	52979.8	50462	31528.1	35332.2	31291.6	57297.4	45846.4	39335.9	29898.8	21221.8	33417.4	0	31362.4	24618.1	19937.2	24405	0	0	19414.4	0	0	0
Cyclohexaneacetic acid		HMDB0031403	21363	37277	NA	83695.1	81917.4	77648.2	93430.8	73293.4	78218.4	68261.6	59883.3	90296.4	81380.4	70828.3	77336.6	97751.7	61165.1	67996.6	57721.5	53827.8	67794.3	54063.9	75450.4	74457.6	60976.8	80425.2	78154.1	69819.7	69619.7	68942.2	62732.9	85502.3	69160.2	69030.1	82340.9	77460.4	97448.3	74460.6	78421.1	63975.1	80083.7	69837.5	63781.6	79658	96205.2	84787.9	84959.9
Cyclohexanol		HMDB0012971	8103	87393	C00854	68246.8	83025.3	90228.6	82355.9	60371	52449.1	65304.2	57858.9	73487.2	61006.2	63588.6	72858.2	68669.2	66007.4	80947.1	43598.9	51475	60406.7	59755.3	74676.6	64620.4	56799.2	82646.3	83299.2	57985.2	33929.2	55306.2	56844.3	73361	64224.9	68825.9	47325.6	47134.3	59048.8	58439	46417.4	50584.9	58185.1	45011.6	42323.3	47624.8	60008.5	61950.2	49526.8
Cyclohexyl 3-methylbutanoate		HMDB0034428	287439	NA	NA	309034	320740	293821	269294	217104	283689	311343	362226	288594	268578	271059	298196	265667	311945	376786	205478	259773	331045	247427	291458	327829	265874	391031	354682	286991	228648	301005	247328	305922	248143	192236	79297.4	74478.3	86984.4	87988.8	61451.4	63170	86007.9	65822.3	57758.6	138894	79557.3	69502.4	59403.4
Cyclohexyl acetate		HMDB0031352	12146	NA	C12297	83695.1	81917.4	77648.2	93430.8	73293.4	78218.4	68261.6	59883.3	90296.4	81380.4	70828.3	77336.6	97751.7	61165.1	67996.6	57721.5	53827.8	67794.3	54063.9	75450.4	74457.6	60976.8	80425.2	78154.1	69819.7	69619.7	68942.2	62732.9	85502.3	69160.2	69030.1	82340.9	77460.4	97448.3	74460.6	78421.1	63975.1	80083.7	69837.5	63781.6	79658	96205.2	84787.9	84959.9
Cyclohexyl butanoate		HMDB0034427	243783	NA	NA	403094	487353	495635	440662	329030	444513	463203	477301	503970	457144	413035	485976	370373	462660	608536	244537	382065	482415	408085	507728	526754	430094	599832	514565	407043	323168	416666	333202	431254	339426	338844	164164	125509	173980	161805	126286	154237	207961	131391	130946	231210	181746	183962	171513
Cyclohexyl pentanoate		HMDB0034429	73772	NA	NA	309034	320740	293821	269294	217104	283689	311343	362226	288594	268578	271059	298196	265667	311945	376786	205478	259773	331045	247427	291458	327829	265874	391031	354682	286991	228648	301005	247328	305922	248143	192236	79297.4	74478.3	86984.4	87988.8	61451.4	63170	86007.9	65822.3	57758.6	138894	79557.3	69502.4	59403.4
Cyclohexylethyl acetate		HMDB0031362	30771	NA	NA	403094	487353	495635	440662	329030	444513	463203	477301	503970	457144	413035	485976	370373	462660	608536	244537	382065	482415	408085	507728	526754	430094	599832	514565	407043	323168	416666	333202	431254	339426	338844	164164	125509	173980	161805	126286	154237	207961	131391	130946	231210	181746	183962	171513
Cyclopentanone		HMDB0031407	8452	16486	C00557	75519.4	80879.1	67980.6	87867.8	61007.5	61489.5	61430	56223.3	56604.2	78104.3	68954.1	84552.6	59839.8	86573.8	71819.4	65029.5	58213.9	54010.2	68718.4	39045.8	79992.7	58417.2	128319	51115	76859.9	69534.4	84998.8	61067.6	71433.4	76576.7	70756.6	80120.5	64817.1	60440.7	51578.2	55921.9	74286.1	89296.9	38499.3	46812.9	45178.3	56000.1	72622	54148.8
D(-)-beta-hydroxy butyric acid	identified	HMDB0000357	441	20067	C01089	954894	1.221e+06	1.22456e+06	1.01754e+06	474237	887834	780612	698448	1.1793e+06	808538	1.5429e+06	955056	734891	1.23866e+06	1.61551e+06	881384	878981	903594	781750	621242	854302	995793	1.23106e+06	1.38992e+06	656266	937814	1.07456e+06	912365	1.1872e+06	873493	644047	304453	67807.4	0	139053	325271	130674	298684	69428.6	0	105242	43804.4	455419	0
D-2,3-Dihydroxypropanoic acid		HMDB0031818	439194	33508	C00258	198924	194014	159826	242804	88147.9	111325	171156	125484	191119	230582	194472	134001	113307	197377	178641	113762	212078	285504	103605	623336	149761	155180	363867	150404	96801.5	104516	89663.3	95927.3	123568	87231.1	113849	107269	180199	234603	201371	151933	172309	120338	243184	232060	197755	207353	142715	162068
D-4-Hydroxy-2-oxoglutarate		HMDB0060466	440853	4083	C05946	90224.3	110289	61834.4	123772	11589.2	12202.8	0	8193.57	152282	143721	86859.8	9591.59	0	93395	4968.92	7965.91	32118.4	21436.8	14920.3	12434.9	77559.7	55105.8	46758.2	72776	14230.9	0	0	0	68321.9	0	6327.29	51453.3	119228	137478	114246	71652.3	73472.2	76688.2	235085	110517	134151	133271	109896	155037
D-Allose		HMDB0001151	12285879	37741	C01487	1540254	1.67919e+06	1.9796e+06	1825421	1.95816e+06	1.82696e+06	1.61079e+06	1.76032e+06	1.97601e+06	1.662e+06	1.72949e+06	1.70587e+06	1.84115e+06	2.77634e+06	1564488	1714890	1.31061e+06	1.01264e+06	1.48834e+06	1075626	1.55374e+06	1.28646e+06	1.225e+06	1.78276e+06	1.41583e+06	2.08046e+06	2179152	1832286	1.87681e+06	1.84927e+06	1.47229e+06	1.51973e+06	2.01794e+06	1.53132e+06	1.44439e+06	1.92226e+06	1.61617e+06	1810911	1.67998e+06	1.90648e+06	1.66314e+06	1.67312e+06	1.5588e+06	1.882e+06
Dambonitol		HMDB0033942	NA	NA	NA	15322.2	24681.5	35486.2	25288.8	15889.3	27606.5	27783	14375.9	19833.1	22093.3	31729.8	19427	15812.5	23262.3	30005.6	32909.6	27975.3	14256.3	22330.8	15915.5	19848.7	39504.1	42132.7	35689	18962.9	14332.2	26017.4	21708.7	32672.5	21312.2	11834.7	40036.8	27450.5	17869.2	41301.1	45274.2	26874.5	51604.1	24621.9	25616.7	43914.6	21187.5	56891.3	22820.8
D-Arabinonate		HMDB0000539	122045	20912	C00878	156938	104177	132911	134514	144970	128307	137989	134645	165319	112810	106061	120881	113731	130192	135280	137837	185154	161763	145509	161803	199790	210988	147748	135278	158584	134524	89624.9	99611.6	168906	119073	124310	126258	199132	158091	122975	125665	148250	140467	143051	192200	194052	144670	146910	94348.6
D-Aspartate		HMDB0006483	83887	17364	C00402	632735	564122	519210	637544	549731	1.16164e+06	838184	513550	687166	554687	482012	628610	701253	506071	770812	635159	890814	1.20164e+06	672304	2.03419e+06	301048	358530	1.77295e+06	806614	559267	291793	324420	571043	690409	539748	493478	587304	386626	671088	655658	504076	591204	449584	612634	438724	391431	425402	533007	492518
D-chiro-Inositol		HMDB0240209	892	27372	C19891	1540254	1.67919e+06	1.9796e+06	1825421	1.95816e+06	1.82696e+06	1.61079e+06	1.76032e+06	1.97601e+06	1.662e+06	1.72949e+06	1.70587e+06	1.84115e+06	2.77634e+06	1564488	1714890	1.31061e+06	1.01264e+06	1.48834e+06	1075626	1.55374e+06	1.28646e+06	1.225e+06	1.78276e+06	1.41583e+06	2.08046e+06	2179152	1832286	1.87681e+06	1.84927e+06	1.47229e+06	1.51973e+06	2.01794e+06	1.53132e+06	1.44439e+06	1.92226e+06	1.61617e+06	1810911	1.67998e+06	1.90648e+06	1.66314e+06	1.67312e+06	1.5588e+06	1.882e+06
Delta-decalactone		HMDB0037116	12810	87327	NA	403094	487353	495635	440662	329030	444513	463203	477301	503970	457144	413035	485976	370373	462660	608536	244537	382065	482415	408085	507728	526754	430094	599832	514565	407043	323168	416666	333202	431254	339426	338844	164164	125509	173980	161805	126286	154237	207961	131391	130946	231210	181746	183962	171513
Delta-Hexanolactone		HMDB0000453	13204	589927	NA	34268.5	41824.2	35106.6	33477.2	26908.6	25498.6	20700.8	25431.6	29058.4	54635.9	36317.1	21701.8	32713	30171.6	25063.2	24736.9	42240.8	34513.8	29363.7	21539.5	41238	27241.5	31996.4	38251.2	27664.1	28445.2	36077.6	29127.1	46560.4	25445.9	30581.6	48619.4	51196.1	43480.4	66593.1	114095	57434.8	130957	79610.3	40931.3	47211.8	52152.9	121125	54604.3
delta-octanolide		HMDB0038310	12777	NA	NA	83695.1	81917.4	77648.2	93430.8	73293.4	78218.4	68261.6	59883.3	90296.4	81380.4	70828.3	77336.6	97751.7	61165.1	67996.6	57721.5	53827.8	67794.3	54063.9	75450.4	74457.6	60976.8	80425.2	78154.1	69819.7	69619.7	68942.2	62732.9	85502.3	69160.2	69030.1	82340.9	77460.4	97448.3	74460.6	78421.1	63975.1	80083.7	69837.5	63781.6	79658	96205.2	84787.9	84959.9
Desmethylxanthohumol		HMDB0030610	6443339	80489	C16416	34603.2	21859.4	32142.9	30793.5	29032.4	30646.3	32753.5	28928.7	26253.6	29156.7	33137.4	30177.1	34340.1	30020	37457.9	37909.2	35543	37206.3	42986.1	62836.8	45690.9	33397.3	46512.1	44434.3	38034.6	40741.5	32746.2	29033.5	37974.5	21926.9	27766.9	42830.6	38999.8	28534.6	22753.4	24995.9	23249.5	32167.5	38518.3	38379	42153.3	30342.7	29325	37245.7
Dethiobiotin		HMDB0003581	445027	42280	C01909	63459.2	74304.7	76852.7	92938.1	46296.4	70738.1	71668.8	67676.4	87588.8	53705.4	79228.9	72993.4	57595	110479	122146	130373	51887.3	90026.6	54284.5	64251.1	58521.3	76078.4	93841.6	156092	55890.3	82227.8	93606.6	72014.3	63430.1	68456.8	56511.6	69135.1	53179.5	34728.7	39704.4	54512.1	40831.4	80962.4	26697.5	40307	94606.9	33919.6	48115.9	49045.3
D-Fructose		HMDB0000660	439709	28645	C02336	1540254	1.67919e+06	1.9796e+06	1825421	1.95816e+06	1.82696e+06	1.61079e+06	1.76032e+06	1.97601e+06	1.662e+06	1.72949e+06	1.70587e+06	1.84115e+06	2.77634e+06	1564488	1714890	1.31061e+06	1.01264e+06	1.48834e+06	1075626	1.55374e+06	1.28646e+06	1.225e+06	1.78276e+06	1.41583e+06	2.08046e+06	2179152	1832286	1.87681e+06	1.84927e+06	1.47229e+06	1.51973e+06	2.01794e+06	1.53132e+06	1.44439e+06	1.92226e+06	1.61617e+06	1810911	1.67998e+06	1.90648e+06	1.66314e+06	1.67312e+06	1.5588e+06	1.882e+06
D-Fuconate		METPA0211	NA	16824	C01680	1540254	1.67919e+06	1.9796e+06	1825421	1.95816e+06	1.82696e+06	1.61079e+06	1.76032e+06	1.97601e+06	1.662e+06	1.72949e+06	1.70587e+06	1.84115e+06	2.77634e+06	1564488	1714890	1.31061e+06	1.01264e+06	1.48834e+06	1075626	1.55374e+06	1.28646e+06	1.225e+06	1.78276e+06	1.41583e+06	2.08046e+06	2179152	1832286	1.87681e+06	1.84927e+06	1.47229e+06	1.51973e+06	2.01794e+06	1.53132e+06	1.44439e+06	1.92226e+06	1.61617e+06	1810911	1.67998e+06	1.90648e+06	1.66314e+06	1.67312e+06	1.5588e+06	1.882e+06
D-Galactose		HMDB0000143	439357	28061	C00984	1540254	1.67919e+06	1.9796e+06	1825421	1.95816e+06	1.82696e+06	1.61079e+06	1.76032e+06	1.97601e+06	1.662e+06	1.72949e+06	1.70587e+06	1.84115e+06	2.77634e+06	1564488	1714890	1.31061e+06	1.01264e+06	1.48834e+06	1075626	1.55374e+06	1.28646e+06	1.225e+06	1.78276e+06	1.41583e+06	2.08046e+06	2179152	1832286	1.87681e+06	1.84927e+06	1.47229e+06	1.51973e+06	2.01794e+06	1.53132e+06	1.44439e+06	1.92226e+06	1.61617e+06	1810911	1.67998e+06	1.90648e+06	1.66314e+06	1.67312e+06	1.5588e+06	1.882e+06
D-Glucosamine	identified	HMDB0001514	439213	47977	C00329	51321.7	53693.4	55603.7	59212.6	56029.8	41782.1	45393	40886.7	61606.1	50908.3	55265.7	43083	49725.9	79819.9	47483.3	32000.1	39139.7	26121.5	35224.6	12108.8	34360.7	36168.7	26253.5	51505.1	41504.9	54879.8	52059.3	64749.7	55710.2	65092.3	60023.5	49870.7	46271.8	61352.8	47984.2	78249.7	56746.6	53802	58348.9	59380.3	47491.1	46629.7	46660.4	64397.4
D-glucose	identified	HMDB0000122	5793	4167	C00221	1540254	1.67919e+06	1.9796e+06	1825421	1.95816e+06	1.82696e+06	1.61079e+06	1.76032e+06	1.97601e+06	1.662e+06	1.72949e+06	1.70587e+06	1.84115e+06	2.77634e+06	1564488	1714890	1.31061e+06	1.01264e+06	1.48834e+06	1075626	1.55374e+06	1.28646e+06	1.225e+06	1.78276e+06	1.41583e+06	2.08046e+06	2179152	1832286	1.87681e+06	1.84927e+06	1.47229e+06	1.51973e+06	2.01794e+06	1.53132e+06	1.44439e+06	1.92226e+06	1.61617e+06	1810911	1.67998e+06	1.90648e+06	1.66314e+06	1.67312e+06	1.5588e+06	1.882e+06
D-Glucurono-6,3-lactone		HMDB0006355	439782	18268	C02670	86009.7	53816.3	96898.4	158729	17359.2	22047.2	20894.4	15473	126020	219010	296910	33325.7	21528.4	355547	16976	21381	22904.3	42743.3	39629.5	31104.8	223303	161438	88976.9	116273	25044.4	26441.2	38892	12461.4	130659	17680.8	16443	95101.7	276626	156565	136583	95205.2	242368	68085.4	106681	93256.6	325512	160949	153976	183997
D-Glucuronolactone		HMDB0006355	439782	18268	C02670	86009.7	53816.3	96898.4	158729	17359.2	22047.2	20894.4	15473	126020	219010	296910	33325.7	21528.4	355547	16976	21381	22904.3	42743.3	39629.5	31104.8	223303	161438	88976.9	116273	25044.4	26441.2	38892	12461.4	130659	17680.8	16443	95101.7	276626	156565	136583	95205.2	242368	68085.4	106681	93256.6	325512	160949	153976	183997
D-Glutamate		HMDB0000148	33032	16015	C00025	5.80809e+06	7.06151e+06	6.62278e+06	5990323	7638704	7.46656e+06	7101270	10406814	7.93689e+06	5.67973e+06	5.66756e+06	6009460	6.16445e+06	5.69839e+06	7310123	11250793	11493082	9309820	8845775	14076279	6796778	6265097	12129724	6.51872e+06	4.82738e+06	7.73812e+06	5.51663e+06	5040238	7986673	5599903	6.00351e+06	5257871	6833903	6684500	6720563	8773508	5.01219e+06	5387662	6.56391e+06	6916141	5.76526e+06	5644493	6105444	8.1353e+06
D-Glutamine		HMDB0003423	145815	17061	C00819	55257060	53648564	53929864	78011128	51703016	72669704	59772820	62329452	55746040	59579548	51811356	69629464	76732384	65521884	60568116	63454836	46855756	54225856	67569288	50618444	45576736	47444200	49263852	78622064	62380264	71422112	67128024	79004896	60695680	47414028	65589332	71586784	62982020	49129308	46691176	44611148	52194284	42311788	56477280	56484144	58263440	46946964	56083036	57669604
D-Hexose		HMDB0000143	439357	28061	C00984	1540254	1.67919e+06	1.9796e+06	1825421	1.95816e+06	1.82696e+06	1.61079e+06	1.76032e+06	1.97601e+06	1.662e+06	1.72949e+06	1.70587e+06	1.84115e+06	2.77634e+06	1564488	1714890	1.31061e+06	1.01264e+06	1.48834e+06	1075626	1.55374e+06	1.28646e+06	1.225e+06	1.78276e+06	1.41583e+06	2.08046e+06	2179152	1832286	1.87681e+06	1.84927e+06	1.47229e+06	1.51973e+06	2.01794e+06	1.53132e+06	1.44439e+06	1.92226e+06	1.61617e+06	1810911	1.67998e+06	1.90648e+06	1.66314e+06	1.67312e+06	1.5588e+06	1.882e+06
Dibutyl phthalate		HMDB0033244	3026	34687	C14214	140551	150211	181075	155996	119656	135240	263915	117564	126307	137773	104935	121300	118729	138087	112620	98838.2	125480	131372	133774	117190	146438	116105	114124	130025	110114	93357.9	151723	115094	171804	98917.7	121241	113785	162176	204584	122427	124844	140483	297092	199355	212515	200406	259873	149136	183126
Dicyclohexyl disulfide		HMDB0041448	17356	NA	NA	48864.6	58296.2	49529.9	39376.9	31042.4	55667.4	41664.7	67284.5	84172.9	78216	44265.1	40737.9	36594.7	52509.3	48035.8	20262.6	40945.4	30460.5	28524.9	42542.6	48627	31816.7	52591.8	61616.7	32636.3	33859.5	61555.6	28518	44386.2	45142.2	28427.9	16695.7	24785.2	16090.5	19433.9	17353.6	15198.6	27807.7	17064	17304.3	36697.6	13583.8	31627.6	19979.6
Diethanolamine		HMDB0004437	8113	28123	C06772	167242	212379	264066	179269	155232	181469	208585	143263	174649	211867	237393	150283	186276	191175	218679	238601	183114	168093	142632	161387	276676	235377	180147	196262	132725	223200	195450	197203	237657	186033	138338	591721	575462	161468	779569	833817	537524	388195	295359	382833	691947	324071	822666	261409
diethyl acetic acid		HMDB0031221	6915	410868	NA	2.28202e+06	2.44802e+06	2.67102e+06	2.37729e+06	1.93155e+06	2.6323e+06	2.47014e+06	2.29271e+06	2.73045e+06	2.28869e+06	1.81642e+06	2.91286e+06	2123246	2.36444e+06	3.60295e+06	1.21265e+06	2.30287e+06	2725161	2.07744e+06	2.60667e+06	2.36361e+06	2.30766e+06	2.52162e+06	2.78959e+06	2.28737e+06	1.12185e+06	2.00102e+06	1.85176e+06	2.33975e+06	2.17494e+06	1.74504e+06	5.44662e+06	5.28788e+06	8102586	5.45059e+06	5136677	5261508	5.85648e+06	7194426	4609864	5.51374e+06	5.88861e+06	7103756	7120424
Diethyl carbonate		HMDB0059844	7766	NA	NA	1.107e+06	1.61645e+06	1.25292e+06	1.20826e+06	974962	1.28529e+06	1.18303e+06	1.32551e+06	1.4004e+06	1.38259e+06	1.54977e+06	1.08015e+06	1.37746e+06	1.63471e+06	1.40794e+06	1.14858e+06	2.27983e+06	1.44593e+06	991529	949075	3.1254e+06	3.34185e+06	1.50857e+06	1644150	1.7157e+06	2.53997e+06	901580	1.2353e+06	1.54439e+06	1.19634e+06	2.19382e+06	1.40347e+06	1.29212e+06	1.29809e+06	860963	985831	831446	1.11999e+06	709748	1.28068e+06	1.98068e+06	1.29784e+06	1.02892e+06	835987
Diethyl glutarate		HMDB0059879	13163	87319	NA	294161	292649	362573	312789	276612	353848	272464	259481	393119	293483	319734	351261	262288	349839	349010	166447	311050	322700	255503	271450	308555	225864	365407	437670	201540	246329	290636	247008	347563	270861	236362	197998	171490	187606	135506	174254	170424	241181	161755	196161	279967	248208	281390	219395
Diethyl methylsuccinate		HMDB0059814	107321	NA	NA	294161	292649	362573	312789	276612	353848	272464	259481	393119	293483	319734	351261	262288	349839	349010	166447	311050	322700	255503	271450	308555	225864	365407	437670	201540	246329	290636	247008	347563	270861	236362	197998	171490	187606	135506	174254	170424	241181	161755	196161	279967	248208	281390	219395
Dihydro-3-(1-octenyl)-2,5-furandione		HMDB0037816	5362721	NA	NA	129910	200657	136149	143441	110841	106274	124970	122974	172603	139528	177380	116521	141232	166104	150430	114007	126911	121054	112873	147478	135178	104421	127424	161358	133453	116070	120216	132449	130616	158179	106165	86615.2	128697	53984.3	137265	135435	108067	154684	92932.5	66043.6	87558.5	98998.5	163012	58335.4
Dihydro-3-(2-octenyl)-2,5-furandione		HMDB0033102	5362689	NA	NA	129910	200657	136149	143441	110841	106274	124970	122974	172603	139528	177380	116521	141232	166104	150430	114007	126911	121054	112873	147478	135178	104421	127424	161358	133453	116070	120216	132449	130616	158179	106165	86615.2	128697	53984.3	137265	135435	108067	154684	92932.5	66043.6	87558.5	98998.5	163012	58335.4
Dihydro-4,4-dimethyl-2(3H)-furanone		HMDB0061929	26312	NA	NA	34268.5	41824.2	35106.6	33477.2	26908.6	25498.6	20700.8	25431.6	29058.4	54635.9	36317.1	21701.8	32713	30171.6	25063.2	24736.9	42240.8	34513.8	29363.7	21539.5	41238	27241.5	31996.4	38251.2	27664.1	28445.2	36077.6	29127.1	46560.4	25445.9	30581.6	48619.4	51196.1	43480.4	66593.1	114095	57434.8	130957	79610.3	40931.3	47211.8	52152.9	121125	54604.3
Dihydro-5-(2-octenyl)-2(3H)-furanone		HMDB0030867	5853952	NA	NA	76362.4	90894.3	75547.2	68709.6	61595.6	78885	63850.5	79108	76052.9	78752.7	65333.5	63889.2	66364.3	84609.9	92349.7	44671.4	65743.4	80538.1	56871.4	62028.6	70401.1	53480.2	83910.6	71551.6	58390.6	36650.1	65737.9	57321.8	69636.9	59518	58123.4	29197.2	20682.8	28552	27393	19356.9	29384.6	34331.1	25908.6	27730.2	33053.5	27211.6	33980.7	23951.8
Dihydrocarveol acetate		HMDB0041469	30248	NA	NA	76362.4	90894.3	75547.2	68709.6	61595.6	78885	63850.5	79108	76052.9	78752.7	65333.5	63889.2	66364.3	84609.9	92349.7	44671.4	65743.4	80538.1	56871.4	62028.6	70401.1	53480.2	83910.6	71551.6	58390.6	36650.1	65737.9	57321.8	69636.9	59518	58123.4	29197.2	20682.8	28552	27393	19356.9	29384.6	34331.1	25908.6	27730.2	33053.5	27211.6	33980.7	23951.8
Dihydrocubebin		HMDB0030709	4485343	1001275	C10558	25088.2	28424.6	31842.8	25097.1	39484.9	31643.6	30465.5	44049.1	30460.6	25144.5	26152.2	26935.1	30084.8	28325	29504.2	43233.8	53112.1	44789.8	39069.8	53137.9	35706.9	35725.4	45762	25718.4	22948.8	37598	29005.2	22511.4	41954.9	25144.6	30681.8	28306.7	31779.5	31078.1	22328.9	39238.7	25044.3	22516.7	32336.8	35382.9	28293.2	29937.1	28883	32239.4
Dihydrolipoate		HMDB0012210	421	18047	C02147	16920.5	14836.4	16431.2	26816.9	9194.25	11221.2	9445.63	7956.68	30063.5	26636.7	35561.1	13400.7	10347.4	26933.3	16474.8	9384.63	18719.7	12631.1	10702.6	12157.7	19562.6	21624.5	15250	22264.2	11070.4	13109.8	12287.2	9717.58	18570.9	12637.9	10014.8	17500.9	33403.9	26501.6	20441.6	18483.6	22315.9	20328	21897.7	20937.6	25769	21844.6	31831.6	23698.8
Dihydroxyacetone (dimer)		HMDB0032222	4180364	NA	NA	1540254	1.67919e+06	1.9796e+06	1825421	1.95816e+06	1.82696e+06	1.61079e+06	1.76032e+06	1.97601e+06	1.662e+06	1.72949e+06	1.70587e+06	1.84115e+06	2.77634e+06	1564488	1714890	1.31061e+06	1.01264e+06	1.48834e+06	1075626	1.55374e+06	1.28646e+06	1.225e+06	1.78276e+06	1.41583e+06	2.08046e+06	2179152	1832286	1.87681e+06	1.84927e+06	1.47229e+06	1.51973e+06	2.01794e+06	1.53132e+06	1.44439e+06	1.92226e+06	1.61617e+06	1810911	1.67998e+06	1.90648e+06	1.66314e+06	1.67312e+06	1.5588e+06	1.882e+06
Diisobutyl phthalate		HMDB0013835	6782	79053	C15205	140551	150211	181075	155996	119656	135240	263915	117564	126307	137773	104935	121300	118729	138087	112620	98838.2	125480	131372	133774	117190	146438	116105	114124	130025	110114	93357.9	151723	115094	171804	98917.7	121241	113785	162176	204584	122427	124844	140483	297092	199355	212515	200406	259873	149136	183126
dimethadione		HMDB0061093	3081	NA	NA	2.70472e+06	2.59688e+06	2963935	2.94483e+06	2.69327e+06	3.41179e+06	3.54092e+06	3.54544e+06	2.92903e+06	2.81881e+06	3.29909e+06	2750800	3.44404e+06	2.90506e+06	3229938	3.60681e+06	3968073	4.00734e+06	4216474	5.67088e+06	4.77157e+06	3611308	4.6253e+06	4.73089e+06	4800854	4568997	3.15983e+06	3.1172e+06	3.60034e+06	2.51572e+06	2.77714e+06	4.18697e+06	3582345	2.55328e+06	2315090	2933072	2.84001e+06	2.70779e+06	3499983	4.15245e+06	4940586	2.33787e+06	2.76964e+06	3.48574e+06
Dimethyl carbonate		HMDB0029580	12021	36596	NA	34604040	32366062	29686998	28032482	33920504	37309564	37693416	62224104	26912984	29790164	39323216	35144460	36549092	78211616	48374172	64851360	47586364	55510288	47541176	95735264	40326796	34245000	88165760	37155892	33809576	42927720	39803268	31499218	40889440	28879110	28979262	36533772	24347202	30594836	27474300	36138668	28200484	18962858	24667236	19444306	50020192	24658152	19440104	25157594
Dimethyl sulfone		HMDB0004983	6213	9349	C11142	70876	80046.3	70449.5	59917.7	53997.1	47881.8	49436.9	50364.4	88561.5	54682.4	66692.6	64625	56228.6	69645.1	77224.3	43307.9	52577	56731.4	69729.6	70313.9	65997.3	58907.6	81362.9	69015.9	66133.9	46166.4	57451.3	56527.2	51763.1	55557.3	59793	105985	102837	93889.6	94728.6	89879.2	108043	87093.8	117879	160914	136936	83934.9	101044	105171
DL-2-hydroxy valeric acid		HMDB0001863	98009	60647	NA	1.107e+06	1.61645e+06	1.25292e+06	1.20826e+06	974962	1.28529e+06	1.18303e+06	1.32551e+06	1.4004e+06	1.38259e+06	1.54977e+06	1.08015e+06	1.37746e+06	1.63471e+06	1.40794e+06	1.14858e+06	2.27983e+06	1.44593e+06	991529	949075	3.1254e+06	3.34185e+06	1.50857e+06	1644150	1.7157e+06	2.53997e+06	901580	1.2353e+06	1.54439e+06	1.19634e+06	2.19382e+06	1.40347e+06	1.29212e+06	1.29809e+06	860963	985831	831446	1.11999e+06	709748	1.28068e+06	1.98068e+06	1.29784e+06	1.02892e+06	835987
DL-3-hydroxy caproic acid		HMDB0061652	151492	37049	NA	325808	397432	341500	309214	236865	242158	333978	275568	467726	339154	344064	309472	264954	371445	366957	203836	334007	327211	252096	272780	307163	293697	376911	401865	202274	237681	257716	213396	309933	338272	241916	120140	114052	122455	107787	123662	93379.2	107378	98495.5	152286	166687	134491	124153	123728
D-Leucic acid	identified	HMDB0000624	439960	55534	C03264	325808	397432	341500	309214	236865	242158	333978	275568	467726	339154	344064	309472	264954	371445	366957	203836	334007	327211	252096	272780	307163	293697	376911	401865	202274	237681	257716	213396	309933	338272	241916	120140	114052	122455	107787	123662	93379.2	107378	98495.5	152286	166687	134491	124153	123728
DL-Glutamate		HMDB0060475	611	18237	C00302	5.80809e+06	7.06151e+06	6.62278e+06	5990323	7638704	7.46656e+06	7101270	10406814	7.93689e+06	5.67973e+06	5.66756e+06	6009460	6.16445e+06	5.69839e+06	7310123	11250793	11493082	9309820	8845775	14076279	6796778	6265097	12129724	6.51872e+06	4.82738e+06	7.73812e+06	5.51663e+06	5040238	7986673	5599903	6.00351e+06	5257871	6833903	6684500	6720563	8773508	5.01219e+06	5387662	6.56391e+06	6916141	5.76526e+06	5644493	6105444	8.1353e+06
D-Mannose		HMDB0000169	18950	4208	C00936	1540254	1.67919e+06	1.9796e+06	1825421	1.95816e+06	1.82696e+06	1.61079e+06	1.76032e+06	1.97601e+06	1.662e+06	1.72949e+06	1.70587e+06	1.84115e+06	2.77634e+06	1564488	1714890	1.31061e+06	1.01264e+06	1.48834e+06	1075626	1.55374e+06	1.28646e+06	1.225e+06	1.78276e+06	1.41583e+06	2.08046e+06	2179152	1832286	1.87681e+06	1.84927e+06	1.47229e+06	1.51973e+06	2.01794e+06	1.53132e+06	1.44439e+06	1.92226e+06	1.61617e+06	1810911	1.67998e+06	1.90648e+06	1.66314e+06	1.67312e+06	1.5588e+06	1.882e+06
Dolichin B		HMDB0029468	74977387	NA	NA	34603.2	21859.4	32142.9	30793.5	29032.4	30646.3	32753.5	28928.7	26253.6	29156.7	33137.4	30177.1	34340.1	30020	37457.9	37909.2	35543	37206.3	42986.1	62836.8	45690.9	33397.3	46512.1	44434.3	38034.6	40741.5	32746.2	29033.5	37974.5	21926.9	27766.9	42830.6	38999.8	28534.6	22753.4	24995.9	23249.5	32167.5	38518.3	38379	42153.3	30342.7	29325	37245.7
D-Ribonate		HMDB0000867	5460677	21077	C01685	156938	104177	132911	134514	144970	128307	137989	134645	165319	112810	106061	120881	113731	130192	135280	137837	185154	161763	145509	161803	199790	210988	147748	135278	158584	134524	89624.9	99611.6	168906	119073	124310	126258	199132	158091	122975	125665	148250	140467	143051	192200	194052	144670	146910	94348.6
D-Tagatose		HMDB0003418	14408225	49092	C00795	1540254	1.67919e+06	1.9796e+06	1825421	1.95816e+06	1.82696e+06	1.61079e+06	1.76032e+06	1.97601e+06	1.662e+06	1.72949e+06	1.70587e+06	1.84115e+06	2.77634e+06	1564488	1714890	1.31061e+06	1.01264e+06	1.48834e+06	1075626	1.55374e+06	1.28646e+06	1.225e+06	1.78276e+06	1.41583e+06	2.08046e+06	2179152	1832286	1.87681e+06	1.84927e+06	1.47229e+06	1.51973e+06	2.01794e+06	1.53132e+06	1.44439e+06	1.92226e+06	1.61617e+06	1810911	1.67998e+06	1.90648e+06	1.66314e+06	1.67312e+06	1.5588e+06	1.882e+06
D-Xylonate		METPA0050	NA	48093	C00502	156938	104177	132911	134514	144970	128307	137989	134645	165319	112810	106061	120881	113731	130192	135280	137837	185154	161763	145509	161803	199790	210988	147748	135278	158584	134524	89624.9	99611.6	168906	119073	124310	126258	199132	158091	122975	125665	148250	140467	143051	192200	194052	144670	146910	94348.6
Ecgonine		HMDB0006548	443003	708641	C10858	12127656	24512184	12366234	871845	17578748	15619278	17249572	10499168	2.1686e+06	1.63571e+06	719955	682195	10103205	816023	19959980	7.96028e+06	10326317	21947042	19055816	570514	2.36333e+06	15049173	1.07531e+06	4391309	5.41676e+06	5.73501e+06	2.80159e+06	8416841	12880184	7.44482e+06	25231562	16447786	567561	3.36875e+06	4.96881e+06	17678966	16127220	5819309	7874106	11371472	10154740	3.45783e+06	1.30875e+06	547437
Egomaketone		HMDB0038184	42978	NA	NA	319857	360362	339209	294864	228467	318225	320920	294556	366724	307306	281947	314430	291533	318799	391287	246331	823553	543953	325456	761641	329494	277535	871394	326916	267529	187581	292959	203942	315391	243716	205839	82776.2	110117	97077.6	225574	51406.6	43058.9	110897	113319	57713.3	64605.6	159978	94811.4	64758.7
Elemicin		HMDB0033778	10248	NA	C10451	45176	45628.5	51174	34194	22415.2	39135.1	26801.2	24636.3	51815.2	50444.6	31284.9	41873.3	35140.4	29461.5	47013	20175.3	37899.1	26876.7	29734.7	20121.4	28143	43389.1	50165.4	39652.5	30522.9	30218.9	27476.8	26820.2	48262.9	25679.8	29160.9	62292.7	47120.5	31420	45543.4	82195.1	40295.9	108252	45469.3	33411.6	79106	53372.2	123836	40799.1
Enol-3-Ethyl-1,2-cyclopentanedione		HMDB0031223	62752	NA	NA	44527.8	38993	49939.9	33315.1	36861	39517.2	29847.9	28948.7	34893.1	51301.7	36034.5	31718.3	32598.4	41186	37746.6	26228.5	30983.7	34968.3	28658.7	34442.3	38471.1	31565.1	37294	39566.7	44184.7	29332.1	37357.3	31230.4	31835.1	30813.1	29212.8	46181.9	49299.9	35719.4	54526.2	68550.1	49160.3	56809.8	51342.4	56083.4	55079.3	65128.9	51810.2	46301.8
ent-16b,19-Kauranediol 19-acetate		HMDB0036801	630219	NA	NA	41344.9	19159.3	31558.4	27883	15178.7	18203.1	15577.1	16826.5	21592.5	20443.4	19464.2	17741.3	14967.5	6433.65	16342.9	14025.7	11036	8574.81	11596.2	13211.8	16119.3	10234.5	15321.5	24283.8	17408	14909.2	13869.6	14287.8	28649.7	12632.1	12782.3	14619.1	22636.3	25120.1	29442.2	28276.2	30854	22018	30236.8	26892.1	23258	28031.5	20553.2	18834.8
Epinepetalactone		HMDB0035063	92770	NA	NA	125608	137869	162940	113897	69438.4	111236	117134	113408	198233	166327	113129	95501.3	111009	147315	107696	60184.6	127233	122066	126081	85493.6	102991	85812.9	142585	174777	76043.9	70660.7	81507.4	79837	108682	119309	97758.3	119131	165126	126387	117883	174560	128250	242214	153779	147094	177844	156160	190980	161819
Epoxyanethole		HMDB0034615	148535	NA	NA	319857	360362	339209	294864	228467	318225	320920	294556	366724	307306	281947	314430	291533	318799	391287	246331	823553	543953	325456	761641	329494	277535	871394	326916	267529	187581	292959	203942	315391	243716	205839	82776.2	110117	97077.6	225574	51406.6	43058.9	110897	113319	57713.3	64605.6	159978	94811.4	64758.7
epsilon-Caprolactone		HMDB0060476	10401	17915	C01880	34268.5	41824.2	35106.6	33477.2	26908.6	25498.6	20700.8	25431.6	29058.4	54635.9	36317.1	21701.8	32713	30171.6	25063.2	24736.9	42240.8	34513.8	29363.7	21539.5	41238	27241.5	31996.4	38251.2	27664.1	28445.2	36077.6	29127.1	46560.4	25445.9	30581.6	48619.4	51196.1	43480.4	66593.1	114095	57434.8	130957	79610.3	40931.3	47211.8	52152.9	121125	54604.3
Erythrono-1,4-lactone		HMDB0000349	5325915	87625	NA	774808	692366	832251	717509	652307	737040	728509	771589	784721	729590	601656	644254	651646	838996	750323	517696	644675	750894	597250	703592	750330	620655	851764	857661	651532	697293	684638	547543	834269	678525	664080	437541	522601	526174	340238	414101	385389	560280	499217	417227	358125	534002	592698	417060
Ethiin		HMDB0037057	25202259	NA	NA	314114	335174	365399	627715	255519	286704	314828	76280.1	464272	590338	398895	289566	211020	215144	299334	67253.6	252281	366640	238425	298252	172340	307708	366672	410916	287080	135004	187185	163929	330695	339300	355702	255290	619512	597596	391748	383641	324158	581992	395544	434452	313737	669485	580982	654725
Ethosuximide		HMDB0014731	3291	4887	C07505	183117	228304	250962	145830	172375	217855	170068	141584	188549	199454	320969	193350	196743	117289	190862	144335	368675	307007	155061	183924	182832	296369	230290	360747	244145	316855	155806	166622	343111	195753	217689	356610	218597	251507	384179	342404	368598	519129	273617	379229	273384	245825	400778	255455
Ethyl (±)-2-methyl-4-pentenoate		HMDB0029761	62024	NA	NA	83695.1	81917.4	77648.2	93430.8	73293.4	78218.4	68261.6	59883.3	90296.4	81380.4	70828.3	77336.6	97751.7	61165.1	67996.6	57721.5	53827.8	67794.3	54063.9	75450.4	74457.6	60976.8	80425.2	78154.1	69819.7	69619.7	68942.2	62732.9	85502.3	69160.2	69030.1	82340.9	77460.4	97448.3	74460.6	78421.1	63975.1	80083.7	69837.5	63781.6	79658	96205.2	84787.9	84959.9
Ethyl (±)-2-methylpentanoate		HMDB0031579	62902	NA	NA	4954824	5.14197e+06	4.41919e+06	4.82049e+06	5765679	5892011	5.07004e+06	5464260	4797286	3.64796e+06	4.84736e+06	6130662	5.12007e+06	6475661	5.90411e+06	3081296	7.21951e+06	9157299	6169049	7.69341e+06	5.73703e+06	7005724	9996086	5.16342e+06	4.68692e+06	1.93052e+06	3824784	3377617	6.38554e+06	4767635	4082351	9323195	7.81657e+06	11156823	10348903	7223643	7.55598e+06	8117199	11308355	7875526	7821792	9446027	7832668	10037557
Ethyl (±)-3-hydroxybutyrate		HMDB0040409	62572	87685	NA	325808	397432	341500	309214	236865	242158	333978	275568	467726	339154	344064	309472	264954	371445	366957	203836	334007	327211	252096	272780	307163	293697	376911	401865	202274	237681	257716	213396	309933	338272	241916	120140	114052	122455	107787	123662	93379.2	107378	98495.5	152286	166687	134491	124153	123728
Ethyl (±)-3-methylpentanoate		HMDB0034234	560255	NA	NA	4954824	5.14197e+06	4.41919e+06	4.82049e+06	5765679	5892011	5.07004e+06	5464260	4797286	3.64796e+06	4.84736e+06	6130662	5.12007e+06	6475661	5.90411e+06	3081296	7.21951e+06	9157299	6169049	7.69341e+06	5.73703e+06	7005724	9996086	5.16342e+06	4.68692e+06	1.93052e+06	3824784	3377617	6.38554e+06	4767635	4082351	9323195	7.81657e+06	11156823	10348903	7223643	7.55598e+06	8117199	11308355	7875526	7821792	9446027	7832668	10037557
Ethyl (2E,4E,7Z)-Decatrienoate		HMDB0035375	71587096	NA	NA	151667	125457	146408	122789	85130.3	115858	128881	98168.7	137868	129400	123148	102185	100871	126715	165295	93591.6	127904	128741	103532	117243	106050	126700	150913	131959	106466	83258.6	100243	96871.8	137405	128675	94347.1	95805.1	88245.5	50123.4	85965.7	102175	92384.1	103824	63369.8	133098	138871	97121	80252.8	93801.3
Ethyl (2E,4Z,7Z)-Decatrienoate		HMDB0035376	71587513	NA	NA	151667	125457	146408	122789	85130.3	115858	128881	98168.7	137868	129400	123148	102185	100871	126715	165295	93591.6	127904	128741	103532	117243	106050	126700	150913	131959	106466	83258.6	100243	96871.8	137405	128675	94347.1	95805.1	88245.5	50123.4	85965.7	102175	92384.1	103824	63369.8	133098	138871	97121	80252.8	93801.3
Ethyl (E)-2-nonenoate		HMDB0031272	12277543	NA	NA	309034	320740	293821	269294	217104	283689	311343	362226	288594	268578	271059	298196	265667	311945	376786	205478	259773	331045	247427	291458	327829	265874	391031	354682	286991	228648	301005	247328	305922	248143	192236	79297.4	74478.3	86984.4	87988.8	61451.4	63170	86007.9	65822.3	57758.6	138894	79557.3	69502.4	59403.4
Ethyl (E)-2-octenoate		HMDB0037497	5352768	NA	NA	403094	487353	495635	440662	329030	444513	463203	477301	503970	457144	413035	485976	370373	462660	608536	244537	382065	482415	408085	507728	526754	430094	599832	514565	407043	323168	416666	333202	431254	339426	338844	164164	125509	173980	161805	126286	154237	207961	131391	130946	231210	181746	183962	171513
Ethyl (E)-3-hexenoate		HMDB0032266	5362623	NA	NA	83695.1	81917.4	77648.2	93430.8	73293.4	78218.4	68261.6	59883.3	90296.4	81380.4	70828.3	77336.6	97751.7	61165.1	67996.6	57721.5	53827.8	67794.3	54063.9	75450.4	74457.6	60976.8	80425.2	78154.1	69819.7	69619.7	68942.2	62732.9	85502.3	69160.2	69030.1	82340.9	77460.4	97448.3	74460.6	78421.1	63975.1	80083.7	69837.5	63781.6	79658	96205.2	84787.9	84959.9
ethyl 2E,4Z-decadienoate		HMDB0036599	5281162	4896	C08486	76362.4	90894.3	75547.2	68709.6	61595.6	78885	63850.5	79108	76052.9	78752.7	65333.5	63889.2	66364.3	84609.9	92349.7	44671.4	65743.4	80538.1	56871.4	62028.6	70401.1	53480.2	83910.6	71551.6	58390.6	36650.1	65737.9	57321.8	69636.9	59518	58123.4	29197.2	20682.8	28552	27393	19356.9	29384.6	34331.1	25908.6	27730.2	33053.5	27211.6	33980.7	23951.8
Ethyl 2E-hexenoate		HMDB0032268	5364778	NA	NA	83695.1	81917.4	77648.2	93430.8	73293.4	78218.4	68261.6	59883.3	90296.4	81380.4	70828.3	77336.6	97751.7	61165.1	67996.6	57721.5	53827.8	67794.3	54063.9	75450.4	74457.6	60976.8	80425.2	78154.1	69819.7	69619.7	68942.2	62732.9	85502.3	69160.2	69030.1	82340.9	77460.4	97448.3	74460.6	78421.1	63975.1	80083.7	69837.5	63781.6	79658	96205.2	84787.9	84959.9
Ethyl 2-ethylbutanoate		HMDB0040298	76326	NA	NA	4954824	5.14197e+06	4.41919e+06	4.82049e+06	5765679	5892011	5.07004e+06	5464260	4797286	3.64796e+06	4.84736e+06	6130662	5.12007e+06	6475661	5.90411e+06	3081296	7.21951e+06	9157299	6169049	7.69341e+06	5.73703e+06	7005724	9996086	5.16342e+06	4.68692e+06	1.93052e+06	3824784	3377617	6.38554e+06	4767635	4082351	9323195	7.81657e+06	11156823	10348903	7223643	7.55598e+06	8117199	11308355	7875526	7821792	9446027	7832668	10037557
Ethyl 2-ethylhexanoate		HMDB0032264	102916	606526	NA	9949007	11504798	11419062	9327990	7611035	10557322	12258934	11924596	11121203	10087879	8976714	11839756	8963184	10683619	14898223	6.08635e+06	9378611	12510601	10533930	10980307	12879971	9452784	13969028	11505806	9738459	7.43292e+06	9378756	7251482	9339049	8226159	6.97687e+06	2.77864e+06	3.51156e+06	5.40678e+06	3.36879e+06	2.54327e+06	3.71239e+06	5.53706e+06	3.01635e+06	2.83467e+06	3.79552e+06	4814188	3.59266e+06	5.48434e+06
Ethyl 2-hydroxyisovalerate		HMDB0059842	520125	NA	NA	178947	202640	177959	176880	112816	173479	219725	161563	273277	189127	228650	213593	210229	253332	274963	144766	244540	305105	161519	164374	199030	155352	294460	262924	137640	124669	141467	154233	156235	127113	184856	169043	156628	223479	188211	157163	138707	215150	175326	123081	144756	155229	166353	204260
Ethyl 2-methyl-3-pentenoate		HMDB0037622	14423335	NA	NA	83695.1	81917.4	77648.2	93430.8	73293.4	78218.4	68261.6	59883.3	90296.4	81380.4	70828.3	77336.6	97751.7	61165.1	67996.6	57721.5	53827.8	67794.3	54063.9	75450.4	74457.6	60976.8	80425.2	78154.1	69819.7	69619.7	68942.2	62732.9	85502.3	69160.2	69030.1	82340.9	77460.4	97448.3	74460.6	78421.1	63975.1	80083.7	69837.5	63781.6	79658	96205.2	84787.9	84959.9
Ethyl 3-cyclohexylpropionate		HMDB0031406	61466	NA	NA	309034	320740	293821	269294	217104	283689	311343	362226	288594	268578	271059	298196	265667	311945	376786	205478	259773	331045	247427	291458	327829	265874	391031	354682	286991	228648	301005	247328	305922	248143	192236	79297.4	74478.3	86984.4	87988.8	61451.4	63170	86007.9	65822.3	57758.6	138894	79557.3	69502.4	59403.4
Ethyl 3-oxohexanoate		HMDB0031307	238498	18119	C02975	725537	909899	730622	661799	538843	590477	709836	769860	872325	735692	576060	751613	629733	809478	873124	356186	678111	785050	609766	585886	755381	538295	714600	879770	470162	443530	632329	476894	687153	645897	543934	629235	455056	444668	450805	589883	435334	799372	417877	411818	597636	414990	858311	421107
Ethyl 4-methylpentanoate		HMDB0032272	117477	NA	NA	4954824	5.14197e+06	4.41919e+06	4.82049e+06	5765679	5892011	5.07004e+06	5464260	4797286	3.64796e+06	4.84736e+06	6130662	5.12007e+06	6475661	5.90411e+06	3081296	7.21951e+06	9157299	6169049	7.69341e+06	5.73703e+06	7005724	9996086	5.16342e+06	4.68692e+06	1.93052e+06	3824784	3377617	6.38554e+06	4767635	4082351	9323195	7.81657e+06	11156823	10348903	7223643	7.55598e+06	8117199	11308355	7875526	7821792	9446027	7832668	10037557
Ethyl 4Z-octenoate		HMDB0039795	5352799	NA	NA	403094	487353	495635	440662	329030	444513	463203	477301	503970	457144	413035	485976	370373	462660	608536	244537	382065	482415	408085	507728	526754	430094	599832	514565	407043	323168	416666	333202	431254	339426	338844	164164	125509	173980	161805	126286	154237	207961	131391	130946	231210	181746	183962	171513
Ethyl 5-hexenoate		HMDB0032267	6420258	87299	NA	83695.1	81917.4	77648.2	93430.8	73293.4	78218.4	68261.6	59883.3	90296.4	81380.4	70828.3	77336.6	97751.7	61165.1	67996.6	57721.5	53827.8	67794.3	54063.9	75450.4	74457.6	60976.8	80425.2	78154.1	69819.7	69619.7	68942.2	62732.9	85502.3	69160.2	69030.1	82340.9	77460.4	97448.3	74460.6	78421.1	63975.1	80083.7	69837.5	63781.6	79658	96205.2	84787.9	84959.9
Ethyl 5-methylhexanoate		HMDB0059822	234290	NA	NA	31059080	36333212	35153816	31346394	26063910	34265028	37671056	37614436	32756472	31222842	25990618	35452616	24216608	31566360	49759612	18183924	29314668	36772668	29634554	34388456	37593128	31483394	42794468	35495564	31823804	20526698	28560828	22274504	30226706	26423828	20904814	21439336	16472399	28092744	17140688	14065325	19779730	23878034	20280954	17347108	17172318	22708688	19138784	27444522
Ethyl acetate		HMDB0031217	8857	27750	C00849	1.81681e+06	3.93966e+06	3.59409e+06	2.58079e+06	5230106	3.68656e+06	3.15884e+06	8167922	4.58022e+06	1954573	2.92624e+06	4.00314e+06	3389748	3132904	2582963	9731120	10018303	5151012	6330369	3845188	2.88542e+06	4.81403e+06	6.51737e+06	4.97457e+06	3.19513e+06	1.70177e+06	1.55845e+06	1.46756e+06	3.25844e+06	3548256	4.26544e+06	2.62526e+06	1.84804e+06	2.4178e+06	4.01632e+06	1.97717e+06	1.1697e+06	2.51153e+06	2.17896e+06	2.37436e+06	2.21259e+06	4.11471e+06	3.60204e+06	1.77517e+06
Ethyl beta-D-glucopyranoside		HMDB0029968	121667	NA	NA	15322.2	24681.5	35486.2	25288.8	15889.3	27606.5	27783	14375.9	19833.1	22093.3	31729.8	19427	15812.5	23262.3	30005.6	32909.6	27975.3	14256.3	22330.8	15915.5	19848.7	39504.1	42132.7	35689	18962.9	14332.2	26017.4	21708.7	32672.5	21312.2	11834.7	40036.8	27450.5	17869.2	41301.1	45274.2	26874.5	51604.1	24621.9	25616.7	43914.6	21187.5	56891.3	22820.8
Ethyl butyrate		HMDB0033889	7762	NA	NA	2.28202e+06	2.44802e+06	2.67102e+06	2.37729e+06	1.93155e+06	2.6323e+06	2.47014e+06	2.29271e+06	2.73045e+06	2.28869e+06	1.81642e+06	2.91286e+06	2123246	2.36444e+06	3.60295e+06	1.21265e+06	2.30287e+06	2725161	2.07744e+06	2.60667e+06	2.36361e+06	2.30766e+06	2.52162e+06	2.78959e+06	2.28737e+06	1.12185e+06	2.00102e+06	1.85176e+06	2.33975e+06	2.17494e+06	1.74504e+06	5.44662e+06	5.28788e+06	8102586	5.45059e+06	5136677	5261508	5.85648e+06	7194426	4609864	5.51374e+06	5.88861e+06	7103756	7120424
Ethyl crotonate		HMDB0039581	5354263	87334	NA	34268.5	41824.2	35106.6	33477.2	26908.6	25498.6	20700.8	25431.6	29058.4	54635.9	36317.1	21701.8	32713	30171.6	25063.2	24736.9	42240.8	34513.8	29363.7	21539.5	41238	27241.5	31996.4	38251.2	27664.1	28445.2	36077.6	29127.1	46560.4	25445.9	30581.6	48619.4	51196.1	43480.4	66593.1	114095	57434.8	130957	79610.3	40931.3	47211.8	52152.9	121125	54604.3
ethyl hexanoate		HMDB0040209	31265	86055	NA	4954824	5.14197e+06	4.41919e+06	4.82049e+06	5765679	5892011	5.07004e+06	5464260	4797286	3.64796e+06	4.84736e+06	6130662	5.12007e+06	6475661	5.90411e+06	3081296	7.21951e+06	9157299	6169049	7.69341e+06	5.73703e+06	7005724	9996086	5.16342e+06	4.68692e+06	1.93052e+06	3824784	3377617	6.38554e+06	4767635	4082351	9323195	7.81657e+06	11156823	10348903	7223643	7.55598e+06	8117199	11308355	7875526	7821792	9446027	7832668	10037557
Ethyl isopropyl ketone		HMDB0005846	11265	NA	NA	68246.8	83025.3	90228.6	82355.9	60371	52449.1	65304.2	57858.9	73487.2	61006.2	63588.6	72858.2	68669.2	66007.4	80947.1	43598.9	51475	60406.7	59755.3	74676.6	64620.4	56799.2	82646.3	83299.2	57985.2	33929.2	55306.2	56844.3	73361	64224.9	68825.9	47325.6	47134.3	59048.8	58439	46417.4	50584.9	58185.1	45011.6	42323.3	47624.8	60008.5	61950.2	49526.8
Ethyl lactate		HMDB0040735	7344	78321	NA	1.107e+06	1.61645e+06	1.25292e+06	1.20826e+06	974962	1.28529e+06	1.18303e+06	1.32551e+06	1.4004e+06	1.38259e+06	1.54977e+06	1.08015e+06	1.37746e+06	1.63471e+06	1.40794e+06	1.14858e+06	2.27983e+06	1.44593e+06	991529	949075	3.1254e+06	3.34185e+06	1.50857e+06	1644150	1.7157e+06	2.53997e+06	901580	1.2353e+06	1.54439e+06	1.19634e+06	2.19382e+06	1.40347e+06	1.29212e+06	1.29809e+06	860963	985831	831446	1.11999e+06	709748	1.28068e+06	1.98068e+06	1.29784e+06	1.02892e+06	835987
Ethyl levulinate		HMDB0040433	10883	NA	NA	507023	524647	577936	465538	644696	510851	624104	470573	607443	515979	399720	515329	483170	636778	591673	260767	621082	665849	483434	598172	526419	464794	694870	625573	380769	251253	431089	360144	495646	486602	410461	625458	886744	604284	566491	674107	531917	929207	560714	696493	707494	772478	954141	690575
Ethyl nonanoate		HMDB0040193	31251	87501	NA	1.69237e+06	2.03593e+06	1.91863e+06	1.48279e+06	1.27121e+06	1.57707e+06	2.09075e+06	1.89838e+06	1.92771e+06	1.75543e+06	1.51771e+06	1.82407e+06	1.44055e+06	1.84583e+06	2.4127e+06	1.11724e+06	1521156	2.04302e+06	1609977	1.77459e+06	2.2223e+06	1.56491e+06	2.2154e+06	1.98399e+06	1.73029e+06	1.23412e+06	1.65599e+06	1.2052e+06	1.69875e+06	1.35488e+06	1.21874e+06	298319	420139	511203	302649	268375	350309	670715	291895	289214	395764	515219	399649	605233
Ethyl octanoate		HMDB0040195	7799	87426	C12292	9949007	11504798	11419062	9327990	7611035	10557322	12258934	11924596	11121203	10087879	8976714	11839756	8963184	10683619	14898223	6.08635e+06	9378611	12510601	10533930	10980307	12879971	9452784	13969028	11505806	9738459	7.43292e+06	9378756	7251482	9339049	8226159	6.97687e+06	2.77864e+06	3.51156e+06	5.40678e+06	3.36879e+06	2.54327e+06	3.71239e+06	5.53706e+06	3.01635e+06	2.83467e+06	3.79552e+06	4814188	3.59266e+06	5.48434e+06
Ethyl octynecarboxylate		HMDB0036215	61451	NA	NA	62901	81140.9	63751.9	53882.4	39100.1	62278.2	74057.7	60978.1	56959.7	74157.6	67350.2	47522.9	57724.4	60781.4	106842	41259.9	61908	51837.9	39395.9	60619.9	48616.9	50778.8	65848.1	62783.6	39505.9	48705.6	49136.2	63438.6	65372.2	52545.7	48950.1	67099.3	101052	70110.2	69982.7	71691.4	87464.8	90415	71403.1	64993.5	88957	49645.8	96000.2	69621.5
Ethyl pentanoate		HMDB0040297	10882	89771	NA	1932490	2.05705e+06	1.87968e+06	1.95561e+06	1428820	2018299	2321765	2.21171e+06	2.18895e+06	1.55261e+06	1.65363e+06	2.01794e+06	1.6277e+06	1.92967e+06	2949656	1.03395e+06	1.80162e+06	2.40727e+06	1.94378e+06	2.37845e+06	1.89925e+06	1.93736e+06	2.65658e+06	2244925	1.91416e+06	936736	1.58099e+06	1.48376e+06	1.76527e+06	1.55873e+06	1486326	2.97911e+06	2547794	4.40414e+06	3.04848e+06	2.59234e+06	2801523	2935630	3807720	2620054	2618856	3.38579e+06	3001957	3.93279e+06
Ethyl phenylacetate		HMDB0032618	7590	NA	NA	319857	360362	339209	294864	228467	318225	320920	294556	366724	307306	281947	314430	291533	318799	391287	246331	823553	543953	325456	761641	329494	277535	871394	326916	267529	187581	292959	203942	315391	243716	205839	82776.2	110117	97077.6	225574	51406.6	43058.9	110897	113319	57713.3	64605.6	159978	94811.4	64758.7
Ethyl trans-2-methyl-2-pentenoate		HMDB0032278	6436311	NA	NA	83695.1	81917.4	77648.2	93430.8	73293.4	78218.4	68261.6	59883.3	90296.4	81380.4	70828.3	77336.6	97751.7	61165.1	67996.6	57721.5	53827.8	67794.3	54063.9	75450.4	74457.6	60976.8	80425.2	78154.1	69819.7	69619.7	68942.2	62732.9	85502.3	69160.2	69030.1	82340.9	77460.4	97448.3	74460.6	78421.1	63975.1	80083.7	69837.5	63781.6	79658	96205.2	84787.9	84959.9
Ethyl-3-hexanoate		HMDB0059908	61312	87560	NA	83695.1	81917.4	77648.2	93430.8	73293.4	78218.4	68261.6	59883.3	90296.4	81380.4	70828.3	77336.6	97751.7	61165.1	67996.6	57721.5	53827.8	67794.3	54063.9	75450.4	74457.6	60976.8	80425.2	78154.1	69819.7	69619.7	68942.2	62732.9	85502.3	69160.2	69030.1	82340.9	77460.4	97448.3	74460.6	78421.1	63975.1	80083.7	69837.5	63781.6	79658	96205.2	84787.9	84959.9
Ethylhexyl salicylate		HMDB0061839	8364	NA	NA	79405.7	77014.7	64615.2	39276.2	49065.4	71669	52334.1	48857.7	65720.5	61057.7	61368.5	54725.2	46640.6	60385.6	62399.3	32300.1	52296	59950.6	39955.8	50356.4	52315.6	48547.6	48548.1	67934.1	40279.2	36668	51899.8	50269.3	52144.6	43672.2	42031.2	41954.3	45226.5	30687.1	34369.8	24898.6	24785	43373.5	26671.4	27065.9	34819.1	37909.8	39824.1	33989.1
Eugenol	identified	HMDB0005809	3314	4917	C10453	319857	360362	339209	294864	228467	318225	320920	294556	366724	307306	281947	314430	291533	318799	391287	246331	823553	543953	325456	761641	329494	277535	871394	326916	267529	187581	292959	203942	315391	243716	205839	82776.2	110117	97077.6	225574	51406.6	43058.9	110897	113319	57713.3	64605.6	159978	94811.4	64758.7
Fenchyl acetate		HMDB0040725	14019266	NA	C11338	76362.4	90894.3	75547.2	68709.6	61595.6	78885	63850.5	79108	76052.9	78752.7	65333.5	63889.2	66364.3	84609.9	92349.7	44671.4	65743.4	80538.1	56871.4	62028.6	70401.1	53480.2	83910.6	71551.6	58390.6	36650.1	65737.9	57321.8	69636.9	59518	58123.4	29197.2	20682.8	28552	27393	19356.9	29384.6	34331.1	25908.6	27730.2	33053.5	27211.6	33980.7	23951.8
Fructose-1P		HMDB0062538	5984	48095	C10906	1540254	1.67919e+06	1.9796e+06	1825421	1.95816e+06	1.82696e+06	1.61079e+06	1.76032e+06	1.97601e+06	1.662e+06	1.72949e+06	1.70587e+06	1.84115e+06	2.77634e+06	1564488	1714890	1.31061e+06	1.01264e+06	1.48834e+06	1075626	1.55374e+06	1.28646e+06	1.225e+06	1.78276e+06	1.41583e+06	2.08046e+06	2179152	1832286	1.87681e+06	1.84927e+06	1.47229e+06	1.51973e+06	2.01794e+06	1.53132e+06	1.44439e+06	1.92226e+06	1.61617e+06	1810911	1.67998e+06	1.90648e+06	1.66314e+06	1.67312e+06	1.5588e+06	1.882e+06
FS4 toxin		HMDB0037064	14408096	138771	NA	79405.7	77014.7	64615.2	39276.2	49065.4	71669	52334.1	48857.7	65720.5	61057.7	61368.5	54725.2	46640.6	60385.6	62399.3	32300.1	52296	59950.6	39955.8	50356.4	52315.6	48547.6	48548.1	67934.1	40279.2	36668	51899.8	50269.3	52144.6	43672.2	42031.2	41954.3	45226.5	30687.1	34369.8	24898.6	24785	43373.5	26671.4	27065.9	34819.1	37909.8	39824.1	33989.1
Furfuryl isovalerate		HMDB0039874	61658	NA	NA	115416	144676	117828	104242	72557.4	95585.6	98858.4	106646	173135	127044	115271	98442.7	116451	123768	114062	95435.7	103775	105280	104626	92420.2	115607	107699	125763	130080	103867	97847.6	106182	104907	128308	110472	101730	139555	249063	102972	151890	196520	177543	188691	128255	167549	180954	140185	129642	146301
Furfuryl pentanoate		HMDB0037727	61955	NA	NA	115416	144676	117828	104242	72557.4	95585.6	98858.4	106646	173135	127044	115271	98442.7	116451	123768	114062	95435.7	103775	105280	104626	92420.2	115607	107699	125763	130080	103867	97847.6	106182	104907	128308	110472	101730	139555	249063	102972	151890	196520	177543	188691	128255	167549	180954	140185	129642	146301
Galactose		HMDB0000143	439357	28061	C00984	1540254	1.67919e+06	1.9796e+06	1825421	1.95816e+06	1.82696e+06	1.61079e+06	1.76032e+06	1.97601e+06	1.662e+06	1.72949e+06	1.70587e+06	1.84115e+06	2.77634e+06	1564488	1714890	1.31061e+06	1.01264e+06	1.48834e+06	1075626	1.55374e+06	1.28646e+06	1.225e+06	1.78276e+06	1.41583e+06	2.08046e+06	2179152	1832286	1.87681e+06	1.84927e+06	1.47229e+06	1.51973e+06	2.01794e+06	1.53132e+06	1.44439e+06	1.92226e+06	1.61617e+06	1810911	1.67998e+06	1.90648e+06	1.66314e+06	1.67312e+06	1.5588e+06	1.882e+06
gamma-caprolactone		HMDB0003843	12756	85235	NA	34268.5	41824.2	35106.6	33477.2	26908.6	25498.6	20700.8	25431.6	29058.4	54635.9	36317.1	21701.8	32713	30171.6	25063.2	24736.9	42240.8	34513.8	29363.7	21539.5	41238	27241.5	31996.4	38251.2	27664.1	28445.2	36077.6	29127.1	46560.4	25445.9	30581.6	48619.4	51196.1	43480.4	66593.1	114095	57434.8	130957	79610.3	40931.3	47211.8	52152.9	121125	54604.3
gamma-octanolide		HMDB0035422	7704	145738	NA	83695.1	81917.4	77648.2	93430.8	73293.4	78218.4	68261.6	59883.3	90296.4	81380.4	70828.3	77336.6	97751.7	61165.1	67996.6	57721.5	53827.8	67794.3	54063.9	75450.4	74457.6	60976.8	80425.2	78154.1	69819.7	69619.7	68942.2	62732.9	85502.3	69160.2	69030.1	82340.9	77460.4	97448.3	74460.6	78421.1	63975.1	80083.7	69837.5	63781.6	79658	96205.2	84787.9	84959.9
Gemfibrozil		HMDB0015371	3463	5296	C07020	79405.7	77014.7	64615.2	39276.2	49065.4	71669	52334.1	48857.7	65720.5	61057.7	61368.5	54725.2	46640.6	60385.6	62399.3	32300.1	52296	59950.6	39955.8	50356.4	52315.6	48547.6	48548.1	67934.1	40279.2	36668	51899.8	50269.3	52144.6	43672.2	42031.2	41954.3	45226.5	30687.1	34369.8	24898.6	24785	43373.5	26671.4	27065.9	34819.1	37909.8	39824.1	33989.1
Gingerenone C		HMDB0034720	5317593	70703	NA	168293	191242	238324	248194	260242	255421	285170	194106	232787	208401	194614	238684	303154	336253	291686	226406	227152	336308	268883	338464	257795	268245	299406	266150	285317	243513	223190	288560	233458	235176	208015	196312	224927	187930	248024	238104	204304	186267	184343	159675	269333	186109	213827	244912
Glicophenone		HMDB0035467	10021298	NA	NA	25088.2	28424.6	31842.8	25097.1	39484.9	31643.6	30465.5	44049.1	30460.6	25144.5	26152.2	26935.1	30084.8	28325	29504.2	43233.8	53112.1	44789.8	39069.8	53137.9	35706.9	35725.4	45762	25718.4	22948.8	37598	29005.2	22511.4	41954.9	25144.6	30681.8	28306.7	31779.5	31078.1	22328.9	39238.7	25044.3	22516.7	32336.8	35382.9	28293.2	29937.1	28883	32239.4
Glutamine		HMDB0000641	5961	18050	C00064	55257060	53648564	53929864	78011128	51703016	72669704	59772820	62329452	55746040	59579548	51811356	69629464	76732384	65521884	60568116	63454836	46855756	54225856	67569288	50618444	45576736	47444200	49263852	78622064	62380264	71422112	67128024	79004896	60695680	47414028	65589332	71586784	62982020	49129308	46691176	44611148	52194284	42311788	56477280	56484144	58263440	46946964	56083036	57669604
Glutarylcarnitine		HMDB0013130	71317118	82952	NA	61539.4	84365.9	57276.1	68522.5	58487.3	65085.5	65387.6	51614.3	64526.4	105408	40488.7	53210.1	49317.7	91292.4	56845.3	40920.5	50178.2	58866.3	53596.9	76302.9	61046.4	60727.8	85765.6	60084.7	52010.9	75799.9	71936.7	46465.2	50083.7	37181	59813.2	16415.4	17040.9	14731.6	21590.2	8021.12	27977	19376.9	21120.1	15039.4	29810.9	21883.5	29178.1	18935.7
Glyceollidin I		HMDB0034026	44257483	NA	NA	34603.2	21859.4	32142.9	30793.5	29032.4	30646.3	32753.5	28928.7	26253.6	29156.7	33137.4	30177.1	34340.1	30020	37457.9	37909.2	35543	37206.3	42986.1	62836.8	45690.9	33397.3	46512.1	44434.3	38034.6	40741.5	32746.2	29033.5	37974.5	21926.9	27766.9	42830.6	38999.8	28534.6	22753.4	24995.9	23249.5	32167.5	38518.3	38379	42153.3	30342.7	29325	37245.7
Glyceollidin II		HMDB0037916	85206973	50118	C15509	34603.2	21859.4	32142.9	30793.5	29032.4	30646.3	32753.5	28928.7	26253.6	29156.7	33137.4	30177.1	34340.1	30020	37457.9	37909.2	35543	37206.3	42986.1	62836.8	45690.9	33397.3	46512.1	44434.3	38034.6	40741.5	32746.2	29033.5	37974.5	21926.9	27766.9	42830.6	38999.8	28534.6	22753.4	24995.9	23249.5	32167.5	38518.3	38379	42153.3	30342.7	29325	37245.7
Glyceraldehyde		HMDB0001051	751	5445	C02154	34604040	32366062	29686998	28032482	33920504	37309564	37693416	62224104	26912984	29790164	39323216	35144460	36549092	78211616	48374172	64851360	47586364	55510288	47541176	95735264	40326796	34245000	88165760	37155892	33809576	42927720	39803268	31499218	40889440	28879110	28979262	36533772	24347202	30594836	27474300	36138668	28200484	18962858	24667236	19444306	50020192	24658152	19440104	25157594
Glyceric acid		HMDB0000139	439194	32398	C00258	198924	194014	159826	242804	88147.9	111325	171156	125484	191119	230582	194472	134001	113307	197377	178641	113762	212078	285504	103605	623336	149761	155180	363867	150404	96801.5	104516	89663.3	95927.3	123568	87231.1	113849	107269	180199	234603	201371	151933	172309	120338	243184	232060	197755	207353	142715	162068
Glycerol	identified	HMDB0000131	753	17754	C00116	2.57004e+06	2.52627e+06	2.48584e+06	2.78661e+06	1.5583e+06	2.00842e+06	2.69406e+06	2.83248e+06	2860493	2116324	2733356	2452617	2.14083e+06	3.01942e+06	3.86756e+06	2.06091e+06	2.3381e+06	2.71783e+06	2.75241e+06	2.84359e+06	2536608	2517341	3812270	2.95679e+06	2.50993e+06	1.75928e+06	2161239	2.15284e+06	2.23709e+06	2.26175e+06	1.72184e+06	7688173	6831053	8211576	8817970	6948790	7520004	6.45105e+06	7662816	7.65679e+06	8865016	6.87015e+06	6494824	8950575
Glycerone		HMDB0001882	670	16016	C00184	34604040	32366062	29686998	28032482	33920504	37309564	37693416	62224104	26912984	29790164	39323216	35144460	36549092	78211616	48374172	64851360	47586364	55510288	47541176	95735264	40326796	34245000	88165760	37155892	33809576	42927720	39803268	31499218	40889440	28879110	28979262	36533772	24347202	30594836	27474300	36138668	28200484	18962858	24667236	19444306	50020192	24658152	19440104	25157594
Glycerophosphocholine		HMDB0000086	71920	16870	C00670	2698993	1.47235e+06	1.77201e+06	2.45765e+06	1.80413e+06	1.37326e+06	2.50767e+06	1.37281e+06	1.9051e+06	1521769	1.61396e+06	2.45579e+06	3.97056e+06	2.133e+06	2660000	1665582	1.66776e+06	2.22963e+06	1.18244e+06	7130549	2.67631e+06	1.39334e+06	4.35722e+06	1.91494e+06	1.76842e+06	643380	1.1719e+06	1.72182e+06	2659425	1.59348e+06	1360489	2.00016e+06	828078	1.24522e+06	2.32118e+06	1.34507e+06	1.47752e+06	1.71736e+06	1892812	890673	1.66426e+06	1.28048e+06	1.65812e+06	1.75085e+06
Glycoprotein-phospho-D-mannose		HMDB0062473	161658	37675	NA	1540254	1.67919e+06	1.9796e+06	1825421	1.95816e+06	1.82696e+06	1.61079e+06	1.76032e+06	1.97601e+06	1.662e+06	1.72949e+06	1.70587e+06	1.84115e+06	2.77634e+06	1564488	1714890	1.31061e+06	1.01264e+06	1.48834e+06	1075626	1.55374e+06	1.28646e+06	1.225e+06	1.78276e+06	1.41583e+06	2.08046e+06	2179152	1832286	1.87681e+06	1.84927e+06	1.47229e+06	1.51973e+06	2.01794e+06	1.53132e+06	1.44439e+06	1.92226e+06	1.61617e+06	1810911	1.67998e+06	1.90648e+06	1.66314e+06	1.67312e+06	1.5588e+06	1.882e+06
Guaifenesin		HMDB0004998	3516	200157	NA	26771.8	26920.9	36438.9	27563.2	24175.7	26688.8	24814.6	19594.8	40371.3	37100.1	39233.9	39637.4	29362.7	31115.6	38607.5	16412.3	25980.1	26939.5	32274.7	22367.6	28163.7	35621.6	23877.7	38096.1	19653.9	26501.9	29459.1	21171.9	44009.7	33353.9	20259	25953.2	57428.5	33063.5	35804	39932.4	30209.2	74966.6	29082.6	22442.6	32136	55650.3	64242.3	46928
Heliannuol A		HMDB0039644	15241136	NA	NA	79405.7	77014.7	64615.2	39276.2	49065.4	71669	52334.1	48857.7	65720.5	61057.7	61368.5	54725.2	46640.6	60385.6	62399.3	32300.1	52296	59950.6	39955.8	50356.4	52315.6	48547.6	48548.1	67934.1	40279.2	36668	51899.8	50269.3	52144.6	43672.2	42031.2	41954.3	45226.5	30687.1	34369.8	24898.6	24785	43373.5	26671.4	27065.9	34819.1	37909.8	39824.1	33989.1
Heliannuol D		HMDB0035137	11425230	NA	NA	79405.7	77014.7	64615.2	39276.2	49065.4	71669	52334.1	48857.7	65720.5	61057.7	61368.5	54725.2	46640.6	60385.6	62399.3	32300.1	52296	59950.6	39955.8	50356.4	52315.6	48547.6	48548.1	67934.1	40279.2	36668	51899.8	50269.3	52144.6	43672.2	42031.2	41954.3	45226.5	30687.1	34369.8	24898.6	24785	43373.5	26671.4	27065.9	34819.1	37909.8	39824.1	33989.1
Heptanal propyleneglycol acetal		HMDB0032302	20357	120941	NA	9949007	11504798	11419062	9327990	7611035	10557322	12258934	11924596	11121203	10087879	8976714	11839756	8963184	10683619	14898223	6.08635e+06	9378611	12510601	10533930	10980307	12879971	9452784	13969028	11505806	9738459	7.43292e+06	9378756	7251482	9339049	8226159	6.97687e+06	2.77864e+06	3.51156e+06	5.40678e+06	3.36879e+06	2.54327e+06	3.71239e+06	5.53706e+06	3.01635e+06	2.83467e+06	3.79552e+06	4814188	3.59266e+06	5.48434e+06
Heptanoic acid	identified	HMDB0000666	8094	45571	C17714	1932490	2.05705e+06	1.87968e+06	1.95561e+06	1428820	2018299	2321765	2.21171e+06	2.18895e+06	1.55261e+06	1.65363e+06	2.01794e+06	1.6277e+06	1.92967e+06	2949656	1.03395e+06	1.80162e+06	2.40727e+06	1.94378e+06	2.37845e+06	1.89925e+06	1.93736e+06	2.65658e+06	2244925	1.91416e+06	936736	1.58099e+06	1.48376e+06	1.76527e+06	1.55873e+06	1486326	2.97911e+06	2547794	4.40414e+06	3.04848e+06	2.59234e+06	2801523	2935630	3807720	2620054	2618856	3.38579e+06	3001957	3.93279e+06
Heptyl 2-methylpropanoate		HMDB0040171	61304	NA	NA	1.69237e+06	2.03593e+06	1.91863e+06	1.48279e+06	1.27121e+06	1.57707e+06	2.09075e+06	1.89838e+06	1.92771e+06	1.75543e+06	1.51771e+06	1.82407e+06	1.44055e+06	1.84583e+06	2.4127e+06	1.11724e+06	1521156	2.04302e+06	1609977	1.77459e+06	2.2223e+06	1.56491e+06	2.2154e+06	1.98399e+06	1.73029e+06	1.23412e+06	1.65599e+06	1.2052e+06	1.69875e+06	1.35488e+06	1.21874e+06	298319	420139	511203	302649	268375	350309	670715	291895	289214	395764	515219	399649	605233
Heptyl acetate		HMDB0031480	8159	NA	NA	31059080	36333212	35153816	31346394	26063910	34265028	37671056	37614436	32756472	31222842	25990618	35452616	24216608	31566360	49759612	18183924	29314668	36772668	29634554	34388456	37593128	31483394	42794468	35495564	31823804	20526698	28560828	22274504	30226706	26423828	20904814	21439336	16472399	28092744	17140688	14065325	19779730	23878034	20280954	17347108	17172318	22708688	19138784	27444522
Heptyl butyrate		HMDB0034460	62592	NA	NA	1.69237e+06	2.03593e+06	1.91863e+06	1.48279e+06	1.27121e+06	1.57707e+06	2.09075e+06	1.89838e+06	1.92771e+06	1.75543e+06	1.51771e+06	1.82407e+06	1.44055e+06	1.84583e+06	2.4127e+06	1.11724e+06	1521156	2.04302e+06	1609977	1.77459e+06	2.2223e+06	1.56491e+06	2.2154e+06	1.98399e+06	1.73029e+06	1.23412e+06	1.65599e+06	1.2052e+06	1.69875e+06	1.35488e+06	1.21874e+06	298319	420139	511203	302649	268375	350309	670715	291895	289214	395764	515219	399649	605233
Heptyl formate		HMDB0034459	8169	NA	NA	4954824	5.14197e+06	4.41919e+06	4.82049e+06	5765679	5892011	5.07004e+06	5464260	4797286	3.64796e+06	4.84736e+06	6130662	5.12007e+06	6475661	5.90411e+06	3081296	7.21951e+06	9157299	6169049	7.69341e+06	5.73703e+06	7005724	9996086	5.16342e+06	4.68692e+06	1.93052e+06	3824784	3377617	6.38554e+06	4767635	4082351	9323195	7.81657e+06	11156823	10348903	7223643	7.55598e+06	8117199	11308355	7875526	7821792	9446027	7832668	10037557
Heptylmalonic acid		HMDB0059719	136574	70747	NA	173498	164447	161661	128535	111052	103185	140700	136218	163703	131437	198614	167383	124118	145176	182277	80296.6	147206	144879	127018	148255	198248	117622	169483	143889	112854	85446.8	141604	129902	143257	136174	109569	131737	165731	228627	154641	144871	136930	213798	170355	193055	207393	257604	170982	249689
Hexamethylene bisacetamide		HMDB0041901	3616	NA	NA	71197.7	84915.3	79286.7	61924	84579.2	91090.3	61281.4	82148.2	86180.9	95603.2	101306	97694.2	99453.3	90909.2	66863.2	84154	102607	106878	78435.5	75258.3	84957.4	82346.4	90595.5	86514.4	83311.3	73230.7	60307.9	69486.7	81345.9	63079.9	90006.6	99869.7	109045	109271	88994.1	119681	104753	82787.4	94594.5	122061	146152	99508.3	132686	123319
Hexan-3-one		HMDB0000753	11509	89891	NA	68246.8	83025.3	90228.6	82355.9	60371	52449.1	65304.2	57858.9	73487.2	61006.2	63588.6	72858.2	68669.2	66007.4	80947.1	43598.9	51475	60406.7	59755.3	74676.6	64620.4	56799.2	82646.3	83299.2	57985.2	33929.2	55306.2	56844.3	73361	64224.9	68825.9	47325.6	47134.3	59048.8	58439	46417.4	50584.9	58185.1	45011.6	42323.3	47624.8	60008.5	61950.2	49526.8
Hexanal butane-2,3-diol acetal		HMDB0032315	11084346	NA	NA	9949007	11504798	11419062	9327990	7611035	10557322	12258934	11924596	11121203	10087879	8976714	11839756	8963184	10683619	14898223	6.08635e+06	9378611	12510601	10533930	10980307	12879971	9452784	13969028	11505806	9738459	7.43292e+06	9378756	7251482	9339049	8226159	6.97687e+06	2.77864e+06	3.51156e+06	5.40678e+06	3.36879e+06	2.54327e+06	3.71239e+06	5.53706e+06	3.01635e+06	2.83467e+06	3.79552e+06	4814188	3.59266e+06	5.48434e+06
Hexane-2,3-dione		HMDB0031491	19707	87583	NA	34268.5	41824.2	35106.6	33477.2	26908.6	25498.6	20700.8	25431.6	29058.4	54635.9	36317.1	21701.8	32713	30171.6	25063.2	24736.9	42240.8	34513.8	29363.7	21539.5	41238	27241.5	31996.4	38251.2	27664.1	28445.2	36077.6	29127.1	46560.4	25445.9	30581.6	48619.4	51196.1	43480.4	66593.1	114095	57434.8	130957	79610.3	40931.3	47211.8	52152.9	121125	54604.3
Hexyl 2-methylbutanoate		HMDB0039215	24838	NA	NA	1.69237e+06	2.03593e+06	1.91863e+06	1.48279e+06	1.27121e+06	1.57707e+06	2.09075e+06	1.89838e+06	1.92771e+06	1.75543e+06	1.51771e+06	1.82407e+06	1.44055e+06	1.84583e+06	2.4127e+06	1.11724e+06	1521156	2.04302e+06	1609977	1.77459e+06	2.2223e+06	1.56491e+06	2.2154e+06	1.98399e+06	1.73029e+06	1.23412e+06	1.65599e+06	1.2052e+06	1.69875e+06	1.35488e+06	1.21874e+06	298319	420139	511203	302649	268375	350309	670715	291895	289214	395764	515219	399649	605233
Hexyl 2-methylpropanoate		HMDB0037849	16872	17334	C00395	9949007	11504798	11419062	9327990	7611035	10557322	12258934	11924596	11121203	10087879	8976714	11839756	8963184	10683619	14898223	6.08635e+06	9378611	12510601	10533930	10980307	12879971	9452784	13969028	11505806	9738459	7.43292e+06	9378756	7251482	9339049	8226159	6.97687e+06	2.77864e+06	3.51156e+06	5.40678e+06	3.36879e+06	2.54327e+06	3.71239e+06	5.53706e+06	3.01635e+06	2.83467e+06	3.79552e+06	4814188	3.59266e+06	5.48434e+06
Hexyl 3-methylbutanoate		HMDB0032044	61455	NA	NA	1.69237e+06	2.03593e+06	1.91863e+06	1.48279e+06	1.27121e+06	1.57707e+06	2.09075e+06	1.89838e+06	1.92771e+06	1.75543e+06	1.51771e+06	1.82407e+06	1.44055e+06	1.84583e+06	2.4127e+06	1.11724e+06	1521156	2.04302e+06	1609977	1.77459e+06	2.2223e+06	1.56491e+06	2.2154e+06	1.98399e+06	1.73029e+06	1.23412e+06	1.65599e+06	1.2052e+06	1.69875e+06	1.35488e+06	1.21874e+06	298319	420139	511203	302649	268375	350309	670715	291895	289214	395764	515219	399649	605233
Hexyl acetate		HMDB0029980	8908	87510	NA	4954824	5.14197e+06	4.41919e+06	4.82049e+06	5765679	5892011	5.07004e+06	5464260	4797286	3.64796e+06	4.84736e+06	6130662	5.12007e+06	6475661	5.90411e+06	3081296	7.21951e+06	9157299	6169049	7.69341e+06	5.73703e+06	7005724	9996086	5.16342e+06	4.68692e+06	1.93052e+06	3824784	3377617	6.38554e+06	4767635	4082351	9323195	7.81657e+06	11156823	10348903	7223643	7.55598e+06	8117199	11308355	7875526	7821792	9446027	7832668	10037557
hexyl butyrate		HMDB0033620	17525	NA	NA	9949007	11504798	11419062	9327990	7611035	10557322	12258934	11924596	11121203	10087879	8976714	11839756	8963184	10683619	14898223	6.08635e+06	9378611	12510601	10533930	10980307	12879971	9452784	13969028	11505806	9738459	7.43292e+06	9378756	7251482	9339049	8226159	6.97687e+06	2.77864e+06	3.51156e+06	5.40678e+06	3.36879e+06	2.54327e+06	3.71239e+06	5.53706e+06	3.01635e+06	2.83467e+06	3.79552e+06	4814188	3.59266e+06	5.48434e+06
Hexyl crotonate		HMDB0036211	5356908	NA	NA	403094	487353	495635	440662	329030	444513	463203	477301	503970	457144	413035	485976	370373	462660	608536	244537	382065	482415	408085	507728	526754	430094	599832	514565	407043	323168	416666	333202	431254	339426	338844	164164	125509	173980	161805	126286	154237	207961	131391	130946	231210	181746	183962	171513
Hexyl formate		HMDB0032874	61177	NA	NA	1932490	2.05705e+06	1.87968e+06	1.95561e+06	1428820	2018299	2321765	2.21171e+06	2.18895e+06	1.55261e+06	1.65363e+06	2.01794e+06	1.6277e+06	1.92967e+06	2949656	1.03395e+06	1.80162e+06	2.40727e+06	1.94378e+06	2.37845e+06	1.89925e+06	1.93736e+06	2.65658e+06	2244925	1.91416e+06	936736	1.58099e+06	1.48376e+06	1.76527e+06	1.55873e+06	1486326	2.97911e+06	2547794	4.40414e+06	3.04848e+06	2.59234e+06	2801523	2935630	3807720	2620054	2618856	3.38579e+06	3001957	3.93279e+06
hexyl propionate		HMDB0034606	88454	87549	NA	31059080	36333212	35153816	31346394	26063910	34265028	37671056	37614436	32756472	31222842	25990618	35452616	24216608	31566360	49759612	18183924	29314668	36772668	29634554	34388456	37593128	31483394	42794468	35495564	31823804	20526698	28560828	22274504	30226706	26423828	20904814	21439336	16472399	28092744	17140688	14065325	19779730	23878034	20280954	17347108	17172318	22708688	19138784	27444522
Hexylresorcinol		HMDB0032567	3610	NA	NA	151667	125457	146408	122789	85130.3	115858	128881	98168.7	137868	129400	123148	102185	100871	126715	165295	93591.6	127904	128741	103532	117243	106050	126700	150913	131959	106466	83258.6	100243	96871.8	137405	128675	94347.1	95805.1	88245.5	50123.4	85965.7	102175	92384.1	103824	63369.8	133098	138871	97121	80252.8	93801.3
Homoarecoline		HMDB0038321	34167	NA	NA	152107	120647	237512	113705	119452	182862	153128	154548	162537	149872	118253	147321	119674	131628	234007	109001	190890	130066	270231	230902	128054	146620	183914	299484	122394	178061	116428	124105	178576	144880	132011	95096.4	108243	85562.3	100168	104860	100824	157104	115667	82904.5	142661	113655	185682	90234.6
Homomethionine		METPA1742	NA	50707	C17213	347280	431553	289258	423007	539364	431829	527979	379777	321466	449057	244702	315089	615329	220824	594196	385508	276681	363887	288425	307598	171973	190514	359222	380766	391125	194198	317486	363624	343741	403494	419784	404856	425066	406410	341948	483076	286265	279122	319959	323559	246486	378855	332443	417924
Homostachydrine		HMDB0004827	7016563	35280	C10172	4.5313e+06	3794154	2.56301e+06	7.90164e+06	3.2839e+06	2.90023e+06	2.13176e+06	1.07079e+06	8.21749e+06	7171700	2308041	4805048	5.30401e+06	1.36602e+06	2.2637e+06	954177	4.66533e+06	5.63257e+06	1.72939e+06	4797653	5716705	5707570	5.92995e+06	4976579	2.26501e+06	8696261	2.10192e+06	2666826	2.76841e+06	1.58912e+06	793022	3136434	14031907	5.7046e+06	5361634	5991087	3.23842e+06	5284551	2625961	10034943	3.52254e+06	5.09256e+06	8.28024e+06	10454888
Hydroiodic acid		HMDB0059634	24841	43451	C05590	128008	320093	170393	454294	586981	431131	235620	574156	338575	598584	496351	1.27497e+06	382052	4.05365e+06	198257	541514	1.77544e+06	2.23054e+06	1.52706e+06	1.18256e+06	3458119	1.55299e+06	790289	1.01239e+06	232509	1830749	347477	437876	1.5023e+06	283826	210990	1073789	219125	542115	130459	245292	154002	168650	150273	159823	304353	543004	570021	510680
Hydroxyhexanoycarnitine		HMDB0013131	53481624	NA	NA	44451.7	43979.5	56562.1	47830.1	31319.1	40835.8	49312.5	44591.8	54830.7	53486.3	45484.1	42135.2	66143.6	51958	48043.2	27664.2	47414.2	41500.8	31862	33606.2	51327.5	46620	67783.9	60625.1	32905.7	34732.7	40638.8	47387.3	62304.3	52476.5	30409.8	16393.3	27143.6	17776.2	18906.2	28883.5	33131.4	25063.2	14530.9	31956.8	34602	21770.3	30633.2	11883.3
Hydroxyvalerylcarnitine		HMDB0013132	53481626	NA	NA	76122.6	108439	98591.5	83973.6	46175.1	83564.9	49827.7	59081.5	68590.5	107675	88940.8	71345.8	76464.4	73004.4	84139.6	64713	69365.6	114040	60852.2	74430.6	75098.8	58704.4	75627.8	58487.1	48135.1	69599.6	55128.2	66379.4	70640.9	77889.9	108769	37440.3	23069.8	22367.2	31767.4	30672.2	21158.1	34514.9	31584.8	28948.6	40497.7	30669.2	32206.4	25942
Hygrine		METPA0778	NA	46750	C06179	52320.8	61739.3	101428	67150.9	60563.1	64199.4	67604.7	60784.1	70883.8	60191.7	93304.4	64410.6	52032.8	59532.5	89100.9	43664.7	75606.8	59970.1	60348.8	53988.4	61945.6	58399.6	77023.5	121753	47671.7	73549.5	58866.2	67264.2	75975.6	64832.2	48545.5	50179.4	55873.4	45179.2	39439.4	46051.3	42504.8	63464.7	45918.3	37959.7	59419.5	47484.8	76015.4	43499.8
Hypoglycin		HMDB0029427	9081	136270	C08287	183117	228304	250962	145830	172375	217855	170068	141584	188549	199454	320969	193350	196743	117289	190862	144335	368675	307007	155061	183924	182832	296369	230290	360747	244145	316855	155806	166622	343111	195753	217689	356610	218597	251507	384179	342404	368598	519129	273617	379229	273384	245825	400778	255455
Iminodiacetate		HMDB0011753	8897	24786	C19911	632735	564122	519210	637544	549731	1.16164e+06	838184	513550	687166	554687	482012	628610	701253	506071	770812	635159	890814	1.20164e+06	672304	2.03419e+06	301048	358530	1.77295e+06	806614	559267	291793	324420	571043	690409	539748	493478	587304	386626	671088	655658	504076	591204	449584	612634	438724	391431	425402	533007	492518
Imiquimod		HMDB0014862	57469	36704	NA	207123	220217	258707	188342	205591	213116	188096	168308	226530	198163	193236	179813	175852	219364	282947	122651	190755	215321	189324	162447	181498	206235	254001	226727	183440	128448	199967	191285	211889	182694	156252	41211	39516.4	30883.2	40960.6	33006.9	41368.9	41492.2	29837.2	35163.5	30928.7	39577.9	50810.5	29709.8
Iridotrial		METPA0752	NA	5968	C06070	115416	144676	117828	104242	72557.4	95585.6	98858.4	106646	173135	127044	115271	98442.7	116451	123768	114062	95435.7	103775	105280	104626	92420.2	115607	107699	125763	130080	103867	97847.6	106182	104907	128308	110472	101730	139555	249063	102972	151890	196520	177543	188691	128255	167549	180954	140185	129642	146301
Isoamyl 2-furoate		HMDB0059891	69203	NA	NA	115416	144676	117828	104242	72557.4	95585.6	98858.4	106646	173135	127044	115271	98442.7	116451	123768	114062	95435.7	103775	105280	104626	92420.2	115607	107699	125763	130080	103867	97847.6	106182	104907	128308	110472	101730	139555	249063	102972	151890	196520	177543	188691	128255	167549	180954	140185	129642	146301
Isoamyl 2-furonpropionate		HMDB0037735	538506	NA	NA	129910	200657	136149	143441	110841	106274	124970	122974	172603	139528	177380	116521	141232	166104	150430	114007	126911	121054	112873	147478	135178	104421	127424	161358	133453	116070	120216	132449	130616	158179	106165	86615.2	128697	53984.3	137265	135435	108067	154684	92932.5	66043.6	87558.5	98998.5	163012	58335.4
Isoamyl formate		HMDB0034163	8052	31726	C12293	2.28202e+06	2.44802e+06	2.67102e+06	2.37729e+06	1.93155e+06	2.6323e+06	2.47014e+06	2.29271e+06	2.73045e+06	2.28869e+06	1.81642e+06	2.91286e+06	2123246	2.36444e+06	3.60295e+06	1.21265e+06	2.30287e+06	2725161	2.07744e+06	2.60667e+06	2.36361e+06	2.30766e+06	2.52162e+06	2.78959e+06	2.28737e+06	1.12185e+06	2.00102e+06	1.85176e+06	2.33975e+06	2.17494e+06	1.74504e+06	5.44662e+06	5.28788e+06	8102586	5.45059e+06	5136677	5261508	5.85648e+06	7194426	4609864	5.51374e+06	5.88861e+06	7103756	7120424
Isoamyl isovalerate		HMDB0030029	12613	NA	C12289	9949007	11504798	11419062	9327990	7611035	10557322	12258934	11924596	11121203	10087879	8976714	11839756	8963184	10683619	14898223	6.08635e+06	9378611	12510601	10533930	10980307	12879971	9452784	13969028	11505806	9738459	7.43292e+06	9378756	7251482	9339049	8226159	6.97687e+06	2.77864e+06	3.51156e+06	5.40678e+06	3.36879e+06	2.54327e+06	3.71239e+06	5.53706e+06	3.01635e+06	2.83467e+06	3.79552e+06	4814188	3.59266e+06	5.48434e+06
Isoamyl salicylate		HMDB0040225	6874	NA	NA	45176	45628.5	51174	34194	22415.2	39135.1	26801.2	24636.3	51815.2	50444.6	31284.9	41873.3	35140.4	29461.5	47013	20175.3	37899.1	26876.7	29734.7	20121.4	28143	43389.1	50165.4	39652.5	30522.9	30218.9	27476.8	26820.2	48262.9	25679.8	29160.9	62292.7	47120.5	31420	45543.4	82195.1	40295.9	108252	45469.3	33411.6	79106	53372.2	123836	40799.1
Isobutyl enanthate		HMDB0034458	24516	NA	NA	1.69237e+06	2.03593e+06	1.91863e+06	1.48279e+06	1.27121e+06	1.57707e+06	2.09075e+06	1.89838e+06	1.92771e+06	1.75543e+06	1.51771e+06	1.82407e+06	1.44055e+06	1.84583e+06	2.4127e+06	1.11724e+06	1521156	2.04302e+06	1609977	1.77459e+06	2.2223e+06	1.56491e+06	2.2154e+06	1.98399e+06	1.73029e+06	1.23412e+06	1.65599e+06	1.2052e+06	1.69875e+06	1.35488e+06	1.21874e+06	298319	420139	511203	302649	268375	350309	670715	291895	289214	395764	515219	399649	605233
Isobutyl N-methylanthranilate		HMDB0037697	522171	NA	NA	32420.9	43280.4	26206.3	49080.1	20982.1	22069	26640.2	20776.8	50481.2	56027.7	53665.4	17431.4	28567	23165.1	34205.3	30951.5	25629	26219.5	24845.2	33385.4	20806.8	31960.3	34840.1	31967.8	26431.4	18950.6	21595.4	22393.1	30885.8	23951.7	23900.5	33052.4	40310.4	48553.1	59228.2	57792.9	54889.8	75622.8	46341.9	42194.2	34459.3	42431.4	113727	50714
Isobutyric acid		HMDB0001873	6590	16135	C02632	1.81681e+06	3.93966e+06	3.59409e+06	2.58079e+06	5230106	3.68656e+06	3.15884e+06	8167922	4.58022e+06	1954573	2.92624e+06	4.00314e+06	3389748	3132904	2582963	9731120	10018303	5151012	6330369	3845188	2.88542e+06	4.81403e+06	6.51737e+06	4.97457e+06	3.19513e+06	1.70177e+06	1.55845e+06	1.46756e+06	3.25844e+06	3548256	4.26544e+06	2.62526e+06	1.84804e+06	2.4178e+06	4.01632e+06	1.97717e+06	1.1697e+06	2.51153e+06	2.17896e+06	2.37436e+06	2.21259e+06	4.11471e+06	3.60204e+06	1.77517e+06
Isobutyric Acid Anhydride		HMDB0062788	7346	84261	NA	725537	909899	730622	661799	538843	590477	709836	769860	872325	735692	576060	751613	629733	809478	873124	356186	678111	785050	609766	585886	755381	538295	714600	879770	470162	443530	632329	476894	687153	645897	543934	629235	455056	444668	450805	589883	435334	799372	417877	411818	597636	414990	858311	421107
Isocaproic acid		HMDB0000689	12587	74903	NA	2.28202e+06	2.44802e+06	2.67102e+06	2.37729e+06	1.93155e+06	2.6323e+06	2.47014e+06	2.29271e+06	2.73045e+06	2.28869e+06	1.81642e+06	2.91286e+06	2123246	2.36444e+06	3.60295e+06	1.21265e+06	2.30287e+06	2725161	2.07744e+06	2.60667e+06	2.36361e+06	2.30766e+06	2.52162e+06	2.78959e+06	2.28737e+06	1.12185e+06	2.00102e+06	1.85176e+06	2.33975e+06	2.17494e+06	1.74504e+06	5.44662e+06	5.28788e+06	8102586	5.45059e+06	5136677	5261508	5.85648e+06	7194426	4609864	5.51374e+06	5.88861e+06	7103756	7120424
Isocolumbin		HMDB0036837	226036	NA	C17508	25088.2	28424.6	31842.8	25097.1	39484.9	31643.6	30465.5	44049.1	30460.6	25144.5	26152.2	26935.1	30084.8	28325	29504.2	43233.8	53112.1	44789.8	39069.8	53137.9	35706.9	35725.4	45762	25718.4	22948.8	37598	29005.2	22511.4	41954.9	25144.6	30681.8	28306.7	31779.5	31078.1	22328.9	39238.7	25044.3	22516.7	32336.8	35382.9	28293.2	29937.1	28883	32239.4
Isoegomaketone		HMDB0036098	5318556	NA	NA	319857	360362	339209	294864	228467	318225	320920	294556	366724	307306	281947	314430	291533	318799	391287	246331	823553	543953	325456	761641	329494	277535	871394	326916	267529	187581	292959	203942	315391	243716	205839	82776.2	110117	97077.6	225574	51406.6	43058.9	110897	113319	57713.3	64605.6	159978	94811.4	64758.7
Isoelemicin		HMDB0029867	5318557	80837	C16975	45176	45628.5	51174	34194	22415.2	39135.1	26801.2	24636.3	51815.2	50444.6	31284.9	41873.3	35140.4	29461.5	47013	20175.3	37899.1	26876.7	29734.7	20121.4	28143	43389.1	50165.4	39652.5	30522.9	30218.9	27476.8	26820.2	48262.9	25679.8	29160.9	62292.7	47120.5	31420	45543.4	82195.1	40295.9	108252	45469.3	33411.6	79106	53372.2	123836	40799.1
Isoeugenol	identified	HMDB0005802	853433	50545	C10469	319857	360362	339209	294864	228467	318225	320920	294556	366724	307306	281947	314430	291533	318799	391287	246331	823553	543953	325456	761641	329494	277535	871394	326916	267529	187581	292959	203942	315391	243716	205839	82776.2	110117	97077.6	225574	51406.6	43058.9	110897	113319	57713.3	64605.6	159978	94811.4	64758.7
Isoglutamine		METPA1415	NA	NA	C16673	55257060	53648564	53929864	78011128	51703016	72669704	59772820	62329452	55746040	59579548	51811356	69629464	76732384	65521884	60568116	63454836	46855756	54225856	67569288	50618444	45576736	47444200	49263852	78622064	62380264	71422112	67128024	79004896	60695680	47414028	65589332	71586784	62982020	49129308	46691176	44611148	52194284	42311788	56477280	56484144	58263440	46946964	56083036	57669604
Isomintlactone		HMDB0036084	94349	NA	NA	125608	137869	162940	113897	69438.4	111236	117134	113408	198233	166327	113129	95501.3	111009	147315	107696	60184.6	127233	122066	126081	85493.6	102991	85812.9	142585	174777	76043.9	70660.7	81507.4	79837	108682	119309	97758.3	119131	165126	126387	117883	174560	128250	242214	153779	147094	177844	156160	190980	161819
Isooctyl acetate		HMDB0032070	50006	87332	NA	9949007	11504798	11419062	9327990	7611035	10557322	12258934	11924596	11121203	10087879	8976714	11839756	8963184	10683619	14898223	6.08635e+06	9378611	12510601	10533930	10980307	12879971	9452784	13969028	11505806	9738459	7.43292e+06	9378756	7251482	9339049	8226159	6.97687e+06	2.77864e+06	3.51156e+06	5.40678e+06	3.36879e+06	2.54327e+06	3.71239e+06	5.53706e+06	3.01635e+06	2.83467e+06	3.79552e+06	4814188	3.59266e+06	5.48434e+06
Isopentyl 3-methyl-2-butenoate		HMDB0040530	92570	NA	NA	403094	487353	495635	440662	329030	444513	463203	477301	503970	457144	413035	485976	370373	462660	608536	244537	382065	482415	408085	507728	526754	430094	599832	514565	407043	323168	416666	333202	431254	339426	338844	164164	125509	173980	161805	126286	154237	207961	131391	130946	231210	181746	183962	171513
Isopropyl 2-methylbutanoate		HMDB0039217	522214	NA	NA	4954824	5.14197e+06	4.41919e+06	4.82049e+06	5765679	5892011	5.07004e+06	5464260	4797286	3.64796e+06	4.84736e+06	6130662	5.12007e+06	6475661	5.90411e+06	3081296	7.21951e+06	9157299	6169049	7.69341e+06	5.73703e+06	7005724	9996086	5.16342e+06	4.68692e+06	1.93052e+06	3824784	3377617	6.38554e+06	4767635	4082351	9323195	7.81657e+06	11156823	10348903	7223643	7.55598e+06	8117199	11308355	7875526	7821792	9446027	7832668	10037557
Isopropyl 2-methylpropanoate		HMDB0038227	12044	NA	NA	1932490	2.05705e+06	1.87968e+06	1.95561e+06	1428820	2018299	2321765	2.21171e+06	2.18895e+06	1.55261e+06	1.65363e+06	2.01794e+06	1.6277e+06	1.92967e+06	2949656	1.03395e+06	1.80162e+06	2.40727e+06	1.94378e+06	2.37845e+06	1.89925e+06	1.93736e+06	2.65658e+06	2244925	1.91416e+06	936736	1.58099e+06	1.48376e+06	1.76527e+06	1.55873e+06	1486326	2.97911e+06	2547794	4.40414e+06	3.04848e+06	2.59234e+06	2801523	2935630	3807720	2620054	2618856	3.38579e+06	3001957	3.93279e+06
Isopropyl 3-methylbutanoate		HMDB0032046	61914	NA	NA	4954824	5.14197e+06	4.41919e+06	4.82049e+06	5765679	5892011	5.07004e+06	5464260	4797286	3.64796e+06	4.84736e+06	6130662	5.12007e+06	6475661	5.90411e+06	3081296	7.21951e+06	9157299	6169049	7.69341e+06	5.73703e+06	7005724	9996086	5.16342e+06	4.68692e+06	1.93052e+06	3824784	3377617	6.38554e+06	4767635	4082351	9323195	7.81657e+06	11156823	10348903	7223643	7.55598e+06	8117199	11308355	7875526	7821792	9446027	7832668	10037557
Isopropyl benzoate		HMDB0032038	13654	NA	NA	319857	360362	339209	294864	228467	318225	320920	294556	366724	307306	281947	314430	291533	318799	391287	246331	823553	543953	325456	761641	329494	277535	871394	326916	267529	187581	292959	203942	315391	243716	205839	82776.2	110117	97077.6	225574	51406.6	43058.9	110897	113319	57713.3	64605.6	159978	94811.4	64758.7
Isopropyl butyrate		HMDB0039619	61184	89718	NA	1932490	2.05705e+06	1.87968e+06	1.95561e+06	1428820	2018299	2321765	2.21171e+06	2.18895e+06	1.55261e+06	1.65363e+06	2.01794e+06	1.6277e+06	1.92967e+06	2949656	1.03395e+06	1.80162e+06	2.40727e+06	1.94378e+06	2.37845e+06	1.89925e+06	1.93736e+06	2.65658e+06	2244925	1.91416e+06	936736	1.58099e+06	1.48376e+06	1.76527e+06	1.55873e+06	1486326	2.97911e+06	2547794	4.40414e+06	3.04848e+06	2.59234e+06	2801523	2935630	3807720	2620054	2618856	3.38579e+06	3001957	3.93279e+06
Isopropyl formate		HMDB0040579	12257	NA	NA	1.81681e+06	3.93966e+06	3.59409e+06	2.58079e+06	5230106	3.68656e+06	3.15884e+06	8167922	4.58022e+06	1954573	2.92624e+06	4.00314e+06	3389748	3132904	2582963	9731120	10018303	5151012	6330369	3845188	2.88542e+06	4.81403e+06	6.51737e+06	4.97457e+06	3.19513e+06	1.70177e+06	1.55845e+06	1.46756e+06	3.25844e+06	3548256	4.26544e+06	2.62526e+06	1.84804e+06	2.4178e+06	4.01632e+06	1.97717e+06	1.1697e+06	2.51153e+06	2.17896e+06	2.37436e+06	2.21259e+06	4.11471e+06	3.60204e+06	1.77517e+06
Isopropyl hexanoate		HMDB0040430	16832	NA	NA	31059080	36333212	35153816	31346394	26063910	34265028	37671056	37614436	32756472	31222842	25990618	35452616	24216608	31566360	49759612	18183924	29314668	36772668	29634554	34388456	37593128	31483394	42794468	35495564	31823804	20526698	28560828	22274504	30226706	26423828	20904814	21439336	16472399	28092744	17140688	14065325	19779730	23878034	20280954	17347108	17172318	22708688	19138784	27444522
Isopropyl propionate		HMDB0030056	12508	NA	NA	2.28202e+06	2.44802e+06	2.67102e+06	2.37729e+06	1.93155e+06	2.6323e+06	2.47014e+06	2.29271e+06	2.73045e+06	2.28869e+06	1.81642e+06	2.91286e+06	2123246	2.36444e+06	3.60295e+06	1.21265e+06	2.30287e+06	2725161	2.07744e+06	2.60667e+06	2.36361e+06	2.30766e+06	2.52162e+06	2.78959e+06	2.28737e+06	1.12185e+06	2.00102e+06	1.85176e+06	2.33975e+06	2.17494e+06	1.74504e+06	5.44662e+06	5.28788e+06	8102586	5.45059e+06	5136677	5261508	5.85648e+06	7194426	4609864	5.51374e+06	5.88861e+06	7103756	7120424
Isopropyl tiglate		HMDB0037624	6432902	NA	NA	83695.1	81917.4	77648.2	93430.8	73293.4	78218.4	68261.6	59883.3	90296.4	81380.4	70828.3	77336.6	97751.7	61165.1	67996.6	57721.5	53827.8	67794.3	54063.9	75450.4	74457.6	60976.8	80425.2	78154.1	69819.7	69619.7	68942.2	62732.9	85502.3	69160.2	69030.1	82340.9	77460.4	97448.3	74460.6	78421.1	63975.1	80083.7	69837.5	63781.6	79658	96205.2	84787.9	84959.9
Isopulegol acetate		HMDB0040227	94579	NA	NA	76362.4	90894.3	75547.2	68709.6	61595.6	78885	63850.5	79108	76052.9	78752.7	65333.5	63889.2	66364.3	84609.9	92349.7	44671.4	65743.4	80538.1	56871.4	62028.6	70401.1	53480.2	83910.6	71551.6	58390.6	36650.1	65737.9	57321.8	69636.9	59518	58123.4	29197.2	20682.8	28552	27393	19356.9	29384.6	34331.1	25908.6	27730.2	33053.5	27211.6	33980.7	23951.8
Jasmine ketolactone		HMDB0030150	21134279	NA	NA	45176	45628.5	51174	34194	22415.2	39135.1	26801.2	24636.3	51815.2	50444.6	31284.9	41873.3	35140.4	29461.5	47013	20175.3	37899.1	26876.7	29734.7	20121.4	28143	43389.1	50165.4	39652.5	30522.9	30218.9	27476.8	26820.2	48262.9	25679.8	29160.9	62292.7	47120.5	31420	45543.4	82195.1	40295.9	108252	45469.3	33411.6	79106	53372.2	123836	40799.1
Jasmonic acid		HMDB0032797	5281166	18292	C08491	129910	200657	136149	143441	110841	106274	124970	122974	172603	139528	177380	116521	141232	166104	150430	114007	126911	121054	112873	147478	135178	104421	127424	161358	133453	116070	120216	132449	130616	158179	106165	86615.2	128697	53984.3	137265	135435	108067	154684	92932.5	66043.6	87558.5	98998.5	163012	58335.4
Juvenile hormone III		METPA1790	NA	27493	C09694	51364.8	57231.9	67872	56479.6	55632.9	49052.6	68279.1	57300.4	100088	94834.2	74995.6	71310.6	57234.5	57992.4	73714.5	36352.3	41200.8	50841.8	52447.9	67098	73261.4	57033.5	82439.3	71935.4	70799.7	78146.9	61996.7	70441.9	69344.8	62002.6	48545	46047.4	34406.5	54123.7	47467.7	42276.2	34604.6	68573.1	36333.5	59542.4	58769.3	53765.4	56718.2	47867
Karahana lactone		HMDB0041000	72978332	NA	NA	125608	137869	162940	113897	69438.4	111236	117134	113408	198233	166327	113129	95501.3	111009	147315	107696	60184.6	127233	122066	126081	85493.6	102991	85812.9	142585	174777	76043.9	70660.7	81507.4	79837	108682	119309	97758.3	119131	165126	126387	117883	174560	128250	242214	153779	147094	177844	156160	190980	161819
Ketopelenolide a		HMDB0036664	12304831	NA	NA	79405.7	77014.7	64615.2	39276.2	49065.4	71669	52334.1	48857.7	65720.5	61057.7	61368.5	54725.2	46640.6	60385.6	62399.3	32300.1	52296	59950.6	39955.8	50356.4	52315.6	48547.6	48548.1	67934.1	40279.2	36668	51899.8	50269.3	52144.6	43672.2	42031.2	41954.3	45226.5	30687.1	34369.8	24898.6	24785	43373.5	26671.4	27065.9	34819.1	37909.8	39824.1	33989.1
Ketosantalic acid		HMDB0035358	13855209	NA	NA	79405.7	77014.7	64615.2	39276.2	49065.4	71669	52334.1	48857.7	65720.5	61057.7	61368.5	54725.2	46640.6	60385.6	62399.3	32300.1	52296	59950.6	39955.8	50356.4	52315.6	48547.6	48548.1	67934.1	40279.2	36668	51899.8	50269.3	52144.6	43672.2	42031.2	41954.3	45226.5	30687.1	34369.8	24898.6	24785	43373.5	26671.4	27065.9	34819.1	37909.8	39824.1	33989.1
L-(+)-Anaferine	identified	METPA0781	NA	2702	C06183	33012.6	30811.8	43165.3	34991	29369.5	40951.7	64066.2	47228.4	28804.6	25434.7	50197.1	49551.8	48093.9	35572.7	81142	55451.7	26933.7	30433.6	31138.6	34709.9	40050.9	42401.7	52979.8	50462	31528.1	35332.2	31291.6	57297.4	45846.4	39335.9	29898.8	21221.8	33417.4	0	31362.4	24618.1	19937.2	24405	0	0	19414.4	0	0	0
L-1-Pyrroline-3-hydroxy-5-carboxylate		HMDB0001369	1059	27391	C04281	2.70472e+06	2.59688e+06	2963935	2.94483e+06	2.69327e+06	3.41179e+06	3.54092e+06	3.54544e+06	2.92903e+06	2.81881e+06	3.29909e+06	2750800	3.44404e+06	2.90506e+06	3229938	3.60681e+06	3968073	4.00734e+06	4216474	5.67088e+06	4.77157e+06	3611308	4.6253e+06	4.73089e+06	4800854	4568997	3.15983e+06	3.1172e+06	3.60034e+06	2.51572e+06	2.77714e+06	4.18697e+06	3582345	2.55328e+06	2315090	2933072	2.84001e+06	2.70779e+06	3499983	4.15245e+06	4940586	2.33787e+06	2.76964e+06	3.48574e+06
L-2-Amino-3-methylenehexanoic acid		HMDB0030410	76223581	NA	NA	3115833	2.81607e+06	1.0026e+06	12684520	1.48024e+06	1.09527e+06	1.02375e+06	556079	24854000	18994994	8490336	4.82888e+06	1.554e+06	1.18179e+06	1.08388e+06	664752	8.18615e+06	6008488	520016	4548878	8370944	5.67613e+06	6.32065e+06	13465241	1.76495e+06	1.74581e+06	616211	1.17657e+06	1.61961e+06	1.22914e+06	635859	1.857e+06	22583746	15147661	3478042	2.48722e+06	1.46778e+06	2492482	1.72437e+06	6991240	1.96918e+06	15946266	18911942	14833124
L-4-Hydroxyglutamate semialdehyde		HMDB0006556	440851	27809	C05938	5.80809e+06	7.06151e+06	6.62278e+06	5990323	7638704	7.46656e+06	7101270	10406814	7.93689e+06	5.67973e+06	5.66756e+06	6009460	6.16445e+06	5.69839e+06	7310123	11250793	11493082	9309820	8845775	14076279	6796778	6265097	12129724	6.51872e+06	4.82738e+06	7.73812e+06	5.51663e+06	5040238	7986673	5599903	6.00351e+06	5257871	6833903	6684500	6720563	8773508	5.01219e+06	5387662	6.56391e+06	6916141	5.76526e+06	5644493	6105444	8.1353e+06
Lactaronecatorin A		HMDB0037529	10015003	NA	NA	79405.7	77014.7	64615.2	39276.2	49065.4	71669	52334.1	48857.7	65720.5	61057.7	61368.5	54725.2	46640.6	60385.6	62399.3	32300.1	52296	59950.6	39955.8	50356.4	52315.6	48547.6	48548.1	67934.1	40279.2	36668	51899.8	50269.3	52144.6	43672.2	42031.2	41954.3	45226.5	30687.1	34369.8	24898.6	24785	43373.5	26671.4	27065.9	34819.1	37909.8	39824.1	33989.1
Lactate		HMDB0000190	107689	422	C00186	34604040	32366062	29686998	28032482	33920504	37309564	37693416	62224104	26912984	29790164	39323216	35144460	36549092	78211616	48374172	64851360	47586364	55510288	47541176	95735264	40326796	34245000	88165760	37155892	33809576	42927720	39803268	31499218	40889440	28879110	28979262	36533772	24347202	30594836	27474300	36138668	28200484	18962858	24667236	19444306	50020192	24658152	19440104	25157594
L-Aspartate	identified	HMDB0000191	5960	17053	C00049	632735	564122	519210	637544	549731	1.16164e+06	838184	513550	687166	554687	482012	628610	701253	506071	770812	635159	890814	1.20164e+06	672304	2.03419e+06	301048	358530	1.77295e+06	806614	559267	291793	324420	571043	690409	539748	493478	587304	386626	671088	655658	504076	591204	449584	612634	438724	391431	425402	533007	492518
Lauroyl diethanolamide		HMDB0032358	8430	NA	NA	65613.8	27518.6	85245.8	84709.9	45370.8	43901.6	200712	60175.9	71891.4	39401.8	25280	102349	65257	117656	60168.8	98586.2	61064	48806.8	43779.1	45782.4	49199	66724.7	54123	82500.6	53472.6	69738.7	107997	45784.3	90990.7	32030.7	25752.2	0	25307.5	0	0	36861.1	24345.3	72327.7	0	29508.2	34568.2	61334.2	57785.4	27890.8
L-Cysteinylglycine disulfide		HMDB0000709	22833544	89930	NA	93237.3	52250.3	74640.7	67423.9	125641	105807	156482	92551.8	58213.2	50308.6	96269.9	95292.1	177330	61116.9	106932	119354	60359.1	55329.5	134509	154350	32709.8	97606.3	58779.3	60782.7	85053.3	225574	115961	288188	58553.3	100292	108511	58508.4	53082.2	96294.4	63792.7	67266.9	156324	58991	88385.8	67441.5	122854	42559.8	54741	38526.2
Lepalone		HMDB0035414	535169	NA	NA	319857	360362	339209	294864	228467	318225	320920	294556	366724	307306	281947	314430	291533	318799	391287	246331	823553	543953	325456	761641	329494	277535	871394	326916	267529	187581	292959	203942	315391	243716	205839	82776.2	110117	97077.6	225574	51406.6	43058.9	110897	113319	57713.3	64605.6	159978	94811.4	64758.7
Leucinic acid		HMDB0000665	92779	59783	NA	325808	397432	341500	309214	236865	242158	333978	275568	467726	339154	344064	309472	264954	371445	366957	203836	334007	327211	252096	272780	307163	293697	376911	401865	202274	237681	257716	213396	309933	338272	241916	120140	114052	122455	107787	123662	93379.2	107378	98495.5	152286	166687	134491	124153	123728
L-Galactose		HMDB0033704	12003287	37619	C01825	1540254	1.67919e+06	1.9796e+06	1825421	1.95816e+06	1.82696e+06	1.61079e+06	1.76032e+06	1.97601e+06	1.662e+06	1.72949e+06	1.70587e+06	1.84115e+06	2.77634e+06	1564488	1714890	1.31061e+06	1.01264e+06	1.48834e+06	1075626	1.55374e+06	1.28646e+06	1.225e+06	1.78276e+06	1.41583e+06	2.08046e+06	2179152	1832286	1.87681e+06	1.84927e+06	1.47229e+06	1.51973e+06	2.01794e+06	1.53132e+06	1.44439e+06	1.92226e+06	1.61617e+06	1810911	1.67998e+06	1.90648e+06	1.66314e+06	1.67312e+06	1.5588e+06	1.882e+06
L-Glutamate	identified+fragment	HMDB0000148	33032	16015	C00025	5.80809e+06	7.06151e+06	6.62278e+06	5990323	7638704	7.46656e+06	7101270	10406814	7.93689e+06	5.67973e+06	5.66756e+06	6009460	6.16445e+06	5.69839e+06	7310123	11250793	11493082	9309820	8845775	14076279	6796778	6265097	12129724	6.51872e+06	4.82738e+06	7.73812e+06	5.51663e+06	5040238	7986673	5599903	6.00351e+06	5257871	6833903	6684500	6720563	8773508	5.01219e+06	5387662	6.56391e+06	6916141	5.76526e+06	5644493	6105444	8.1353e+06
L-Glutamine	identified+fragment	HMDB0000641	5961	18050	C00064	55257060	53648564	53929864	78011128	51703016	72669704	59772820	62329452	55746040	59579548	51811356	69629464	76732384	65521884	60568116	63454836	46855756	54225856	67569288	50618444	45576736	47444200	49263852	78622064	62380264	71422112	67128024	79004896	60695680	47414028	65589332	71586784	62982020	49129308	46691176	44611148	52194284	42311788	56477280	56484144	58263440	46946964	56083036	57669604
L-Glyceric acid		HMDB0006372	6326776	74324	NA	198924	194014	159826	242804	88147.9	111325	171156	125484	191119	230582	194472	134001	113307	197377	178641	113762	212078	285504	103605	623336	149761	155180	363867	150404	96801.5	104516	89663.3	95927.3	123568	87231.1	113849	107269	180199	234603	201371	151933	172309	120338	243184	232060	197755	207353	142715	162068
L-Gulose		HMDB0012326	10130220	37704	C15923	1540254	1.67919e+06	1.9796e+06	1825421	1.95816e+06	1.82696e+06	1.61079e+06	1.76032e+06	1.97601e+06	1.662e+06	1.72949e+06	1.70587e+06	1.84115e+06	2.77634e+06	1564488	1714890	1.31061e+06	1.01264e+06	1.48834e+06	1075626	1.55374e+06	1.28646e+06	1.225e+06	1.78276e+06	1.41583e+06	2.08046e+06	2179152	1832286	1.87681e+06	1.84927e+06	1.47229e+06	1.51973e+06	2.01794e+06	1.53132e+06	1.44439e+06	1.92226e+06	1.61617e+06	1810911	1.67998e+06	1.90648e+06	1.66314e+06	1.67312e+06	1.5588e+06	1.882e+06
L-Hypoglycin A		HMDB0029427	9081	136270	C08287	183117	228304	250962	145830	172375	217855	170068	141584	188549	199454	320969	193350	196743	117289	190862	144335	368675	307007	155061	183924	182832	296369	230290	360747	244145	316855	155806	166622	343111	195753	217689	356610	218597	251507	384179	342404	368598	519129	273617	379229	273384	245825	400778	255455
Licarin A		HMDB0033319	131751410	NA	C10650	168293	191242	238324	248194	260242	255421	285170	194106	232787	208401	194614	238684	303154	336253	291686	226406	227152	336308	268883	338464	257795	268245	299406	266150	285317	243513	223190	288560	233458	235176	208015	196312	224927	187930	248024	238104	204304	186267	184343	159675	269333	186109	213827	244912
Licocoumarone		HMDB0038755	503731	69098	NA	34603.2	21859.4	32142.9	30793.5	29032.4	30646.3	32753.5	28928.7	26253.6	29156.7	33137.4	30177.1	34340.1	30020	37457.9	37909.2	35543	37206.3	42986.1	62836.8	45690.9	33397.3	46512.1	44434.3	38034.6	40741.5	32746.2	29033.5	37974.5	21926.9	27766.9	42830.6	38999.8	28534.6	22753.4	24995.9	23249.5	32167.5	38518.3	38379	42153.3	30342.7	29325	37245.7
Licoflavanone		HMDB0029866	14218027	NA	NA	34603.2	21859.4	32142.9	30793.5	29032.4	30646.3	32753.5	28928.7	26253.6	29156.7	33137.4	30177.1	34340.1	30020	37457.9	37909.2	35543	37206.3	42986.1	62836.8	45690.9	33397.3	46512.1	44434.3	38034.6	40741.5	32746.2	29033.5	37974.5	21926.9	27766.9	42830.6	38999.8	28534.6	22753.4	24995.9	23249.5	32167.5	38518.3	38379	42153.3	30342.7	29325	37245.7
Lilac alcohol		HMDB0036099	526973	NA	NA	403094	487353	495635	440662	329030	444513	463203	477301	503970	457144	413035	485976	370373	462660	608536	244537	382065	482415	408085	507728	526754	430094	599832	514565	407043	323168	416666	333202	431254	339426	338844	164164	125509	173980	161805	126286	154237	207961	131391	130946	231210	181746	183962	171513
Limonene-1,2-diol		METPA0922	NA	17219	C07276	403094	487353	495635	440662	329030	444513	463203	477301	503970	457144	413035	485976	370373	462660	608536	244537	382065	482415	408085	507728	526754	430094	599832	514565	407043	323168	416666	333202	431254	339426	338844	164164	125509	173980	161805	126286	154237	207961	131391	130946	231210	181746	183962	171513
Linalool oxide (trans-pyranoid)		HMDB0031440	6427788	NA	NA	403094	487353	495635	440662	329030	444513	463203	477301	503970	457144	413035	485976	370373	462660	608536	244537	382065	482415	408085	507728	526754	430094	599832	514565	407043	323168	416666	333202	431254	339426	338844	164164	125509	173980	161805	126286	154237	207961	131391	130946	231210	181746	183962	171513
Linalool oxide III		HMDB0031441	6428574	NA	NA	403094	487353	495635	440662	329030	444513	463203	477301	503970	457144	413035	485976	370373	462660	608536	244537	382065	482415	408085	507728	526754	430094	599832	514565	407043	323168	416666	333202	431254	339426	338844	164164	125509	173980	161805	126286	154237	207961	131391	130946	231210	181746	183962	171513
Linalyl acetate		HMDB0039522	8294	78333	C09863	76362.4	90894.3	75547.2	68709.6	61595.6	78885	63850.5	79108	76052.9	78752.7	65333.5	63889.2	66364.3	84609.9	92349.7	44671.4	65743.4	80538.1	56871.4	62028.6	70401.1	53480.2	83910.6	71551.6	58390.6	36650.1	65737.9	57321.8	69636.9	59518	58123.4	29197.2	20682.8	28552	27393	19356.9	29384.6	34331.1	25908.6	27730.2	33053.5	27211.6	33980.7	23951.8
Linalyl formate		HMDB0030424	61040	NA	NA	62901	81140.9	63751.9	53882.4	39100.1	62278.2	74057.7	60978.1	56959.7	74157.6	67350.2	47522.9	57724.4	60781.4	106842	41259.9	61908	51837.9	39395.9	60619.9	48616.9	50778.8	65848.1	62783.6	39505.9	48705.6	49136.2	63438.6	65372.2	52545.7	48950.1	67099.3	101052	70110.2	69982.7	71691.4	87464.8	90415	71403.1	64993.5	88957	49645.8	96000.2	69621.5
Linalyl oxide		HMDB0035907	22310	88534	NA	403094	487353	495635	440662	329030	444513	463203	477301	503970	457144	413035	485976	370373	462660	608536	244537	382065	482415	408085	507728	526754	430094	599832	514565	407043	323168	416666	333202	431254	339426	338844	164164	125509	173980	161805	126286	154237	207961	131391	130946	231210	181746	183962	171513
L-Lyxonate		HMDB0060255	644110	6268	C05412	156938	104177	132911	134514	144970	128307	137989	134645	165319	112810	106061	120881	113731	130192	135280	137837	185154	161763	145509	161803	199790	210988	147748	135278	158584	134524	89624.9	99611.6	168906	119073	124310	126258	199132	158091	122975	125665	148250	140467	143051	192200	194052	144670	146910	94348.6
L-Methionine (S)-S-oxide		HMDB0002005	158980	17016	C02989	314114	335174	365399	627715	255519	286704	314828	76280.1	464272	590338	398895	289566	211020	215144	299334	67253.6	252281	366640	238425	298252	172340	307708	366672	410916	287080	135004	187185	163929	330695	339300	355702	255290	619512	597596	391748	383641	324158	581992	395544	434452	313737	669485	580982	654725
L-Methionine S-oxide		METPA0344	NA	17016	C02989	314114	335174	365399	627715	255519	286704	314828	76280.1	464272	590338	398895	289566	211020	215144	299334	67253.6	252281	366640	238425	298252	172340	307708	366672	410916	287080	135004	187185	163929	330695	339300	355702	255290	619512	597596	391748	383641	324158	581992	395544	434452	313737	669485	580982	654725
L-prolyl-L-proline		HMDB0011180	11622593	73646	NA	154649	219438	156605	136987	128906	140994	187505	131328	166003	158379	125289	141301	171504	148251	153612	148837	140595	132605	133432	166590	138349	152252	168538	152610	130846	183072	141564	181289	93561.4	139178	144476	88527.4	98858.4	67604.6	68404	73801.7	76626.6	93153.7	63351.6	60565.4	86439.7	81069.4	90132.7	78081.6
L-Rhamnonate		METPA0234	NA	17357	C01934	1540254	1.67919e+06	1.9796e+06	1825421	1.95816e+06	1.82696e+06	1.61079e+06	1.76032e+06	1.97601e+06	1.662e+06	1.72949e+06	1.70587e+06	1.84115e+06	2.77634e+06	1564488	1714890	1.31061e+06	1.01264e+06	1.48834e+06	1075626	1.55374e+06	1.28646e+06	1.225e+06	1.78276e+06	1.41583e+06	2.08046e+06	2179152	1832286	1.87681e+06	1.84927e+06	1.47229e+06	1.51973e+06	2.01794e+06	1.53132e+06	1.44439e+06	1.92226e+06	1.61617e+06	1810911	1.67998e+06	1.90648e+06	1.66314e+06	1.67312e+06	1.5588e+06	1.882e+06
L-Sorbose		HMDB0001266	441484	10295	C08356	1540254	1.67919e+06	1.9796e+06	1825421	1.95816e+06	1.82696e+06	1.61079e+06	1.76032e+06	1.97601e+06	1.662e+06	1.72949e+06	1.70587e+06	1.84115e+06	2.77634e+06	1564488	1714890	1.31061e+06	1.01264e+06	1.48834e+06	1075626	1.55374e+06	1.28646e+06	1.225e+06	1.78276e+06	1.41583e+06	2.08046e+06	2179152	1832286	1.87681e+06	1.84927e+06	1.47229e+06	1.51973e+06	2.01794e+06	1.53132e+06	1.44439e+06	1.92226e+06	1.61617e+06	1810911	1.67998e+06	1.90648e+06	1.66314e+06	1.67312e+06	1.5588e+06	1.882e+06
L-threo-3-Methylaspartate		METPA0417	NA	47980	C03618	5.80809e+06	7.06151e+06	6.62278e+06	5990323	7638704	7.46656e+06	7101270	10406814	7.93689e+06	5.67973e+06	5.66756e+06	6009460	6.16445e+06	5.69839e+06	7310123	11250793	11493082	9309820	8845775	14076279	6796778	6265097	12129724	6.51872e+06	4.82738e+06	7.73812e+06	5.51663e+06	5040238	7986673	5599903	6.00351e+06	5257871	6833903	6684500	6720563	8773508	5.01219e+06	5387662	6.56391e+06	6916141	5.76526e+06	5644493	6105444	8.1353e+06
L-xylo-Hexulonolactone		METPA0381	NA	73681	C03289	86009.7	53816.3	96898.4	158729	17359.2	22047.2	20894.4	15473	126020	219010	296910	33325.7	21528.4	355547	16976	21381	22904.3	42743.3	39629.5	31104.8	223303	161438	88976.9	116273	25044.4	26441.2	38892	12461.4	130659	17680.8	16443	95101.7	276626	156565	136583	95205.2	242368	68085.4	106681	93256.6	325512	160949	153976	183997
L-Xylonate		HMDB0060256	6971043	48092	C05411	156938	104177	132911	134514	144970	128307	137989	134645	165319	112810	106061	120881	113731	130192	135280	137837	185154	161763	145509	161803	199790	210988	147748	135278	158584	134524	89624.9	99611.6	168906	119073	124310	126258	199132	158091	122975	125665	148250	140467	143051	192200	194052	144670	146910	94348.6
Malate		HMDB0000156	222656	30797	C00149	1.1477e+06	814630	1.04021e+06	1.13572e+06	1.39133e+06	1.70645e+06	1.35789e+06	1520693	1.18449e+06	1.01964e+06	1.11704e+06	953884	1.01303e+06	1.90119e+06	1.37121e+06	1.61691e+06	1.10011e+06	1.92322e+06	1.19098e+06	6.7437e+06	2.19677e+06	1.62053e+06	2.97792e+06	1.80551e+06	1.51736e+06	946639	1019497	1.06907e+06	1.90511e+06	1.09838e+06	1.51492e+06	1.28486e+06	912716	1.1859e+06	1.11857e+06	764067	1179725	742611	1.23195e+06	1.16468e+06	1.56927e+06	1.04154e+06	947895	954812
Marmelolactone A		HMDB0036042	131751904	NA	NA	125608	137869	162940	113897	69438.4	111236	117134	113408	198233	166327	113129	95501.3	111009	147315	107696	60184.6	127233	122066	126081	85493.6	102991	85812.9	142585	174777	76043.9	70660.7	81507.4	79837	108682	119309	97758.3	119131	165126	126387	117883	174560	128250	242214	153779	147094	177844	156160	190980	161819
Matairesinol		HMDB0035789	345761	NA	NA	25088.2	28424.6	31842.8	25097.1	39484.9	31643.6	30465.5	44049.1	30460.6	25144.5	26152.2	26935.1	30084.8	28325	29504.2	43233.8	53112.1	44789.8	39069.8	53137.9	35706.9	35725.4	45762	25718.4	22948.8	37598	29005.2	22511.4	41954.9	25144.6	30681.8	28306.7	31779.5	31078.1	22328.9	39238.7	25044.3	22516.7	32336.8	35382.9	28293.2	29937.1	28883	32239.4
Menthadienyl acetate		HMDB0038292	524461	NA	NA	151667	125457	146408	122789	85130.3	115858	128881	98168.7	137868	129400	123148	102185	100871	126715	165295	93591.6	127904	128741	103532	117243	106050	126700	150913	131959	106466	83258.6	100243	96871.8	137405	128675	94347.1	95805.1	88245.5	50123.4	85965.7	102175	92384.1	103824	63369.8	133098	138871	97121	80252.8	93801.3
Menthone lactone		HMDB0040330	62349	50243	C18066	403094	487353	495635	440662	329030	444513	463203	477301	503970	457144	413035	485976	370373	462660	608536	244537	382065	482415	408085	507728	526754	430094	599832	514565	407043	323168	416666	333202	431254	339426	338844	164164	125509	173980	161805	126286	154237	207961	131391	130946	231210	181746	183962	171513
Metenamine		HMDB0029598	4101	6824	NA	6547.01	13013.5	16514.1	8851.02	30451.9	25294.7	22218.6	8968.44	15419.2	10474.7	8125	10797.1	11452.2	10727.4	6527.34	21474.2	13158.8	11367.9	16282.8	8835.34	9585.4	11104.2	10785.6	7987.52	9594.83	12038.2	11903.3	6014.1	0	7463.41	6424.67	49377.9	80506.1	16953.9	57912.8	71408.6	82641.3	46070.9	39446.6	122780	142374	44582.7	33049.4	36007.8
Methionine sulfoxide		HMDB0002005	158980	17016	C02989	314114	335174	365399	627715	255519	286704	314828	76280.1	464272	590338	398895	289566	211020	215144	299334	67253.6	252281	366640	238425	298252	172340	307708	366672	410916	287080	135004	187185	163929	330695	339300	355702	255290	619512	597596	391748	383641	324158	581992	395544	434452	313737	669485	580982	654725
Methotrimeprazine		HMDB0015474	72287	6838	C07192	12706.4	18416.3	19494.3	20649.8	9073.21	14016.7	23180.8	19370.5	23579.7	12325.6	21777.3	13469.1	13641.4	23997.1	29396.7	14417.2	15987.4	19373.2	17112.7	14089.9	14796.3	14229	25799.1	17983.6	13682.9	14746.8	18988.5	20778.8	13440.1	15601.9	15309	13589.3	4473.52	14111	0	0	19555.8	15338.7	0	0	0	0	0	7156.7
Methoxyacetic acid		HMDB0041929	12251	132098	NA	34604040	32366062	29686998	28032482	33920504	37309564	37693416	62224104	26912984	29790164	39323216	35144460	36549092	78211616	48374172	64851360	47586364	55510288	47541176	95735264	40326796	34245000	88165760	37155892	33809576	42927720	39803268	31499218	40889440	28879110	28979262	36533772	24347202	30594836	27474300	36138668	28200484	18962858	24667236	19444306	50020192	24658152	19440104	25157594
Methyl (±)-2-methylpentanoate		HMDB0036237	519890	NA	NA	1932490	2.05705e+06	1.87968e+06	1.95561e+06	1428820	2018299	2321765	2.21171e+06	2.18895e+06	1.55261e+06	1.65363e+06	2.01794e+06	1.6277e+06	1.92967e+06	2949656	1.03395e+06	1.80162e+06	2.40727e+06	1.94378e+06	2.37845e+06	1.89925e+06	1.93736e+06	2.65658e+06	2244925	1.91416e+06	936736	1.58099e+06	1.48376e+06	1.76527e+06	1.55873e+06	1486326	2.97911e+06	2547794	4.40414e+06	3.04848e+06	2.59234e+06	2801523	2935630	3807720	2620054	2618856	3.38579e+06	3001957	3.93279e+06
Methyl (±)-3-hydroxyhexanoate		HMDB0039407	519845	NA	NA	178947	202640	177959	176880	112816	173479	219725	161563	273277	189127	228650	213593	210229	253332	274963	144766	244540	305105	161519	164374	199030	155352	294460	262924	137640	124669	141467	154233	156235	127113	184856	169043	156628	223479	188211	157163	138707	215150	175326	123081	144756	155229	166353	204260
Methyl (2E,4Z)-decadienoate		HMDB0034730	6436336	NA	NA	62901	81140.9	63751.9	53882.4	39100.1	62278.2	74057.7	60978.1	56959.7	74157.6	67350.2	47522.9	57724.4	60781.4	106842	41259.9	61908	51837.9	39395.9	60619.9	48616.9	50778.8	65848.1	62783.6	39505.9	48705.6	49136.2	63438.6	65372.2	52545.7	48950.1	67099.3	101052	70110.2	69982.7	71691.4	87464.8	90415	71403.1	64993.5	88957	49645.8	96000.2	69621.5
Methyl (3b,11x)-3-Hydroxy-8-oxo-6-eremophilen-12-oate		HMDB0041229	85240216	NA	NA	68552.9	65692.4	81926.3	54333.5	61757.8	83041.9	72982.4	66182.8	61046.3	78017.9	78845.5	64957.7	73787.2	74201.5	80271.7	38739.4	62064.7	77781.7	50401.8	97928.7	64149.8	47747.8	69351.8	73578.3	38842.8	40843.1	80844.6	45661.6	86723.7	46119.9	49557.9	39480.4	45738.6	39495	40828.1	39281.1	49086.9	34851.1	38345.3	51467.8	29895.4	38204	39700.8	27877.5
Methyl (R)-3-methyl-2-oxopentanoate		HMDB0037114	545106	NA	NA	507023	524647	577936	465538	644696	510851	624104	470573	607443	515979	399720	515329	483170	636778	591673	260767	621082	665849	483434	598172	526419	464794	694870	625573	380769	251253	431089	360144	495646	486602	410461	625458	886744	604284	566491	674107	531917	929207	560714	696493	707494	772478	954141	690575
Methyl (S)-2-Methylbutanoate		HMDB0029762	13357	NA	NA	2.28202e+06	2.44802e+06	2.67102e+06	2.37729e+06	1.93155e+06	2.6323e+06	2.47014e+06	2.29271e+06	2.73045e+06	2.28869e+06	1.81642e+06	2.91286e+06	2123246	2.36444e+06	3.60295e+06	1.21265e+06	2.30287e+06	2725161	2.07744e+06	2.60667e+06	2.36361e+06	2.30766e+06	2.52162e+06	2.78959e+06	2.28737e+06	1.12185e+06	2.00102e+06	1.85176e+06	2.33975e+06	2.17494e+06	1.74504e+06	5.44662e+06	5.28788e+06	8102586	5.45059e+06	5136677	5261508	5.85648e+06	7194426	4609864	5.51374e+06	5.88861e+06	7103756	7120424
Methyl (xi)-3-nonenoate		HMDB0029859	14690973	NA	NA	403094	487353	495635	440662	329030	444513	463203	477301	503970	457144	413035	485976	370373	462660	608536	244537	382065	482415	408085	507728	526754	430094	599832	514565	407043	323168	416666	333202	431254	339426	338844	164164	125509	173980	161805	126286	154237	207961	131391	130946	231210	181746	183962	171513
Methyl 2-decenoate		HMDB0032396	5368064	NA	NA	309034	320740	293821	269294	217104	283689	311343	362226	288594	268578	271059	298196	265667	311945	376786	205478	259773	331045	247427	291458	327829	265874	391031	354682	286991	228648	301005	247328	305922	248143	192236	79297.4	74478.3	86984.4	87988.8	61451.4	63170	86007.9	65822.3	57758.6	138894	79557.3	69502.4	59403.4
Methyl 2-heptenoate		HMDB0039872	5368087	NA	NA	83695.1	81917.4	77648.2	93430.8	73293.4	78218.4	68261.6	59883.3	90296.4	81380.4	70828.3	77336.6	97751.7	61165.1	67996.6	57721.5	53827.8	67794.3	54063.9	75450.4	74457.6	60976.8	80425.2	78154.1	69819.7	69619.7	68942.2	62732.9	85502.3	69160.2	69030.1	82340.9	77460.4	97448.3	74460.6	78421.1	63975.1	80083.7	69837.5	63781.6	79658	96205.2	84787.9	84959.9
Methyl 2-nonenoate		HMDB0040194	5357388	NA	NA	403094	487353	495635	440662	329030	444513	463203	477301	503970	457144	413035	485976	370373	462660	608536	244537	382065	482415	408085	507728	526754	430094	599832	514565	407043	323168	416666	333202	431254	339426	338844	164164	125509	173980	161805	126286	154237	207961	131391	130946	231210	181746	183962	171513
Methyl 2-undecynoate		HMDB0030945	61524	NA	NA	76362.4	90894.3	75547.2	68709.6	61595.6	78885	63850.5	79108	76052.9	78752.7	65333.5	63889.2	66364.3	84609.9	92349.7	44671.4	65743.4	80538.1	56871.4	62028.6	70401.1	53480.2	83910.6	71551.6	58390.6	36650.1	65737.9	57321.8	69636.9	59518	58123.4	29197.2	20682.8	28552	27393	19356.9	29384.6	34331.1	25908.6	27730.2	33053.5	27211.6	33980.7	23951.8
Methyl 3-hydroxybutyrate		HMDB0041603	15146	NA	NA	1.107e+06	1.61645e+06	1.25292e+06	1.20826e+06	974962	1.28529e+06	1.18303e+06	1.32551e+06	1.4004e+06	1.38259e+06	1.54977e+06	1.08015e+06	1.37746e+06	1.63471e+06	1.40794e+06	1.14858e+06	2.27983e+06	1.44593e+06	991529	949075	3.1254e+06	3.34185e+06	1.50857e+06	1644150	1.7157e+06	2.53997e+06	901580	1.2353e+06	1.54439e+06	1.19634e+06	2.19382e+06	1.40347e+06	1.29212e+06	1.29809e+06	860963	985831	831446	1.11999e+06	709748	1.28068e+06	1.98068e+06	1.29784e+06	1.02892e+06	835987
Methyl 3-methylbutanoate		HMDB0030027	11160	NA	NA	2.28202e+06	2.44802e+06	2.67102e+06	2.37729e+06	1.93155e+06	2.6323e+06	2.47014e+06	2.29271e+06	2.73045e+06	2.28869e+06	1.81642e+06	2.91286e+06	2123246	2.36444e+06	3.60295e+06	1.21265e+06	2.30287e+06	2725161	2.07744e+06	2.60667e+06	2.36361e+06	2.30766e+06	2.52162e+06	2.78959e+06	2.28737e+06	1.12185e+06	2.00102e+06	1.85176e+06	2.33975e+06	2.17494e+06	1.74504e+06	5.44662e+06	5.28788e+06	8102586	5.45059e+06	5136677	5261508	5.85648e+06	7194426	4609864	5.51374e+06	5.88861e+06	7103756	7120424
Methyl 3-phenylpropanoate		HMDB0030060	7643	NA	NA	319857	360362	339209	294864	228467	318225	320920	294556	366724	307306	281947	314430	291533	318799	391287	246331	823553	543953	325456	761641	329494	277535	871394	326916	267529	187581	292959	203942	315391	243716	205839	82776.2	110117	97077.6	225574	51406.6	43058.9	110897	113319	57713.3	64605.6	159978	94811.4	64758.7
Methyl 4,8-decadienoate		HMDB0034708	131751613	NA	NA	62901	81140.9	63751.9	53882.4	39100.1	62278.2	74057.7	60978.1	56959.7	74157.6	67350.2	47522.9	57724.4	60781.4	106842	41259.9	61908	51837.9	39395.9	60619.9	48616.9	50778.8	65848.1	62783.6	39505.9	48705.6	49136.2	63438.6	65372.2	52545.7	48950.1	67099.3	101052	70110.2	69982.7	71691.4	87464.8	90415	71403.1	64993.5	88957	49645.8	96000.2	69621.5
Methyl 4-methylpentanoate		HMDB0036238	17008	NA	NA	1932490	2.05705e+06	1.87968e+06	1.95561e+06	1428820	2018299	2321765	2.21171e+06	2.18895e+06	1.55261e+06	1.65363e+06	2.01794e+06	1.6277e+06	1.92967e+06	2949656	1.03395e+06	1.80162e+06	2.40727e+06	1.94378e+06	2.37845e+06	1.89925e+06	1.93736e+06	2.65658e+06	2244925	1.91416e+06	936736	1.58099e+06	1.48376e+06	1.76527e+06	1.55873e+06	1486326	2.97911e+06	2547794	4.40414e+06	3.04848e+06	2.59234e+06	2801523	2935630	3807720	2620054	2618856	3.38579e+06	3001957	3.93279e+06
Methyl 4-pentenoate		HMDB0040328	543664	NA	NA	34268.5	41824.2	35106.6	33477.2	26908.6	25498.6	20700.8	25431.6	29058.4	54635.9	36317.1	21701.8	32713	30171.6	25063.2	24736.9	42240.8	34513.8	29363.7	21539.5	41238	27241.5	31996.4	38251.2	27664.1	28445.2	36077.6	29127.1	46560.4	25445.9	30581.6	48619.4	51196.1	43480.4	66593.1	114095	57434.8	130957	79610.3	40931.3	47211.8	52152.9	121125	54604.3
Methyl 5-methylhexanoate		HMDB0031596	519894	NA	NA	4954824	5.14197e+06	4.41919e+06	4.82049e+06	5765679	5892011	5.07004e+06	5464260	4797286	3.64796e+06	4.84736e+06	6130662	5.12007e+06	6475661	5.90411e+06	3081296	7.21951e+06	9157299	6169049	7.69341e+06	5.73703e+06	7005724	9996086	5.16342e+06	4.68692e+06	1.93052e+06	3824784	3377617	6.38554e+06	4767635	4082351	9323195	7.81657e+06	11156823	10348903	7223643	7.55598e+06	8117199	11308355	7875526	7821792	9446027	7832668	10037557
Methyl benzoate		HMDB0033968	7150	72775	NA	68708.7	43528.7	48824.3	60176.8	52616.3	44124.8	56966.1	53439.2	87107.1	48783.8	38835.6	67959.7	41229.5	70931.5	102748	35358.7	59270.8	75816.7	48448.1	51040.8	47556.7	48478.1	70897.2	80392.3	44660.4	42313.2	64034.5	50219.4	82217.8	60804.1	53950.5	44770.6	35554.1	42831.3	32625.2	34227.4	42066.8	40043.4	40433.9	37215.5	34516.2	53182.6	56201.9	46961.7
Methyl cyclohexanecarboxylate		HMDB0031343	20748	NA	NA	83695.1	81917.4	77648.2	93430.8	73293.4	78218.4	68261.6	59883.3	90296.4	81380.4	70828.3	77336.6	97751.7	61165.1	67996.6	57721.5	53827.8	67794.3	54063.9	75450.4	74457.6	60976.8	80425.2	78154.1	69819.7	69619.7	68942.2	62732.9	85502.3	69160.2	69030.1	82340.9	77460.4	97448.3	74460.6	78421.1	63975.1	80083.7	69837.5	63781.6	79658	96205.2	84787.9	84959.9
Methyl dihydrojasmonate		HMDB0031740	102861	89741	NA	222412	227728	195753	200625	155495	156094	174321	194187	242098	195163	199292	187099	218183	314651	217857	122468	189644	217160	160240	222896	185226	180942	235185	240435	158089	113679	203092	186594	206150	198779	164319	83031.1	113625	65722.5	80269.8	132257	76574.8	127053	63536	55396	89239.4	82964.2	87086.3	64626.7
Methyl DL-Leucate		HMDB0036231	62908	NA	NA	178947	202640	177959	176880	112816	173479	219725	161563	273277	189127	228650	213593	210229	253332	274963	144766	244540	305105	161519	164374	199030	155352	294460	262924	137640	124669	141467	154233	156235	127113	184856	169043	156628	223479	188211	157163	138707	215150	175326	123081	144756	155229	166353	204260
Methyl geranate		HMDB0059816	5365910	NA	NA	62901	81140.9	63751.9	53882.4	39100.1	62278.2	74057.7	60978.1	56959.7	74157.6	67350.2	47522.9	57724.4	60781.4	106842	41259.9	61908	51837.9	39395.9	60619.9	48616.9	50778.8	65848.1	62783.6	39505.9	48705.6	49136.2	63438.6	65372.2	52545.7	48950.1	67099.3	101052	70110.2	69982.7	71691.4	87464.8	90415	71403.1	64993.5	88957	49645.8	96000.2	69621.5
Methyl heptanoate		HMDB0031478	7826	NA	NA	4954824	5.14197e+06	4.41919e+06	4.82049e+06	5765679	5892011	5.07004e+06	5464260	4797286	3.64796e+06	4.84736e+06	6130662	5.12007e+06	6475661	5.90411e+06	3081296	7.21951e+06	9157299	6169049	7.69341e+06	5.73703e+06	7005724	9996086	5.16342e+06	4.68692e+06	1.93052e+06	3824784	3377617	6.38554e+06	4767635	4082351	9323195	7.81657e+06	11156823	10348903	7223643	7.55598e+06	8117199	11308355	7875526	7821792	9446027	7832668	10037557
Methyl hexanoate		HMDB0035238	7824	77322	NA	1932490	2.05705e+06	1.87968e+06	1.95561e+06	1428820	2018299	2321765	2.21171e+06	2.18895e+06	1.55261e+06	1.65363e+06	2.01794e+06	1.6277e+06	1.92967e+06	2949656	1.03395e+06	1.80162e+06	2.40727e+06	1.94378e+06	2.37845e+06	1.89925e+06	1.93736e+06	2.65658e+06	2244925	1.91416e+06	936736	1.58099e+06	1.48376e+06	1.76527e+06	1.55873e+06	1486326	2.97911e+06	2547794	4.40414e+06	3.04848e+06	2.59234e+06	2801523	2935630	3807720	2620054	2618856	3.38579e+06	3001957	3.93279e+06
Methyl hippurate		HMDB0000859	14566	70869	NA	6587127	4.16879e+06	6.30587e+06	7792590	4.18358e+06	1.74925e+06	5.40687e+06	3.61735e+06	11999195	11344791	9277816	5.75582e+06	2384798	2.46608e+06	5150483	3.46516e+06	13389025	4.71414e+06	3.93841e+06	4.68055e+06	7.57211e+06	5965610	3.18663e+06	7.46534e+06	2.5519e+06	2.15357e+06	2528101	2.98205e+06	2.38889e+06	5290917	5.17531e+06	4.40393e+06	6.08301e+06	7.02355e+06	4.0611e+06	1.88017e+06	3.30362e+06	2880879	5.28289e+06	3697161	4.27324e+06	8676850	17222070	7.97825e+06
Methyl n-acetylanthranilate		HMDB0032388	17623	16803	C06332	6587127	4.16879e+06	6.30587e+06	7792590	4.18358e+06	1.74925e+06	5.40687e+06	3.61735e+06	11999195	11344791	9277816	5.75582e+06	2384798	2.46608e+06	5150483	3.46516e+06	13389025	4.71414e+06	3.93841e+06	4.68055e+06	7.57211e+06	5965610	3.18663e+06	7.46534e+06	2.5519e+06	2.15357e+06	2528101	2.98205e+06	2.38889e+06	5290917	5.17531e+06	4.40393e+06	6.08301e+06	7.02355e+06	4.0611e+06	1.88017e+06	3.30362e+06	2880879	5.28289e+06	3697161	4.27324e+06	8676850	17222070	7.97825e+06
Methyl nonanoate		HMDB0031264	15606	44499	NA	9949007	11504798	11419062	9327990	7611035	10557322	12258934	11924596	11121203	10087879	8976714	11839756	8963184	10683619	14898223	6.08635e+06	9378611	12510601	10533930	10980307	12879971	9452784	13969028	11505806	9738459	7.43292e+06	9378756	7251482	9339049	8226159	6.97687e+06	2.77864e+06	3.51156e+06	5.40678e+06	3.36879e+06	2.54327e+06	3.71239e+06	5.53706e+06	3.01635e+06	2.83467e+06	3.79552e+06	4814188	3.59266e+06	5.48434e+06
Methyl pentanoate		HMDB0031207	12206	NA	NA	2.28202e+06	2.44802e+06	2.67102e+06	2.37729e+06	1.93155e+06	2.6323e+06	2.47014e+06	2.29271e+06	2.73045e+06	2.28869e+06	1.81642e+06	2.91286e+06	2123246	2.36444e+06	3.60295e+06	1.21265e+06	2.30287e+06	2725161	2.07744e+06	2.60667e+06	2.36361e+06	2.30766e+06	2.52162e+06	2.78959e+06	2.28737e+06	1.12185e+06	2.00102e+06	1.85176e+06	2.33975e+06	2.17494e+06	1.74504e+06	5.44662e+06	5.28788e+06	8102586	5.45059e+06	5136677	5261508	5.85648e+06	7194426	4609864	5.51374e+06	5.88861e+06	7103756	7120424
Methyl propenyl ketone		HMDB0001184	637920	89540	NA	75519.4	80879.1	67980.6	87867.8	61007.5	61489.5	61430	56223.3	56604.2	78104.3	68954.1	84552.6	59839.8	86573.8	71819.4	65029.5	58213.9	54010.2	68718.4	39045.8	79992.7	58417.2	128319	51115	76859.9	69534.4	84998.8	61067.6	71433.4	76576.7	70756.6	80120.5	64817.1	60440.7	51578.2	55921.9	74286.1	89296.9	38499.3	46812.9	45178.3	56000.1	72622	54148.8
Methyl sorbate		HMDB0029582	5323650	515741	NA	44527.8	38993	49939.9	33315.1	36861	39517.2	29847.9	28948.7	34893.1	51301.7	36034.5	31718.3	32598.4	41186	37746.6	26228.5	30983.7	34968.3	28658.7	34442.3	38471.1	31565.1	37294	39566.7	44184.7	29332.1	37357.3	31230.4	31835.1	30813.1	29212.8	46181.9	49299.9	35719.4	54526.2	68550.1	49160.3	56809.8	51342.4	56083.4	55079.3	65128.9	51810.2	46301.8
Methylmalonate	identified	HMDB0000202	487	30860	C02170	774808	692366	832251	717509	652307	737040	728509	771589	784721	729590	601656	644254	651646	838996	750323	517696	644675	750894	597250	703592	750330	620655	851764	857661	651532	697293	684638	547543	834269	678525	664080	437541	522601	526174	340238	414101	385389	560280	499217	417227	358125	534002	592698	417060
Methyprylon		HMDB0015239	4162	774741	NA	214791	165409	537742	306915	225335	292557	264311	246457	282126	225187	265967	273892	161012	194084	425643	170219	370623	159255	209904	147697	235163	256234	351078	808764	119730	281351	160123	248384	339527	194888	145637	83606.5	129135	67235.7	83890.2	131726	96237.6	131852	64993.7	74911.5	131909	81753.1	151907	89117.3
m-Methylbenzoate		METPA0915	NA	10589	C07211	68708.7	43528.7	48824.3	60176.8	52616.3	44124.8	56966.1	53439.2	87107.1	48783.8	38835.6	67959.7	41229.5	70931.5	102748	35358.7	59270.8	75816.7	48448.1	51040.8	47556.7	48478.1	70897.2	80392.3	44660.4	42313.2	64034.5	50219.4	82217.8	60804.1	53950.5	44770.6	35554.1	42831.3	32625.2	34227.4	42066.8	40043.4	40433.9	37215.5	34516.2	53182.6	56201.9	46961.7
m-Methylhippuric acid		HMDB0013245	99223	68500	NA	6587127	4.16879e+06	6.30587e+06	7792590	4.18358e+06	1.74925e+06	5.40687e+06	3.61735e+06	11999195	11344791	9277816	5.75582e+06	2384798	2.46608e+06	5150483	3.46516e+06	13389025	4.71414e+06	3.93841e+06	4.68055e+06	7.57211e+06	5965610	3.18663e+06	7.46534e+06	2.5519e+06	2.15357e+06	2528101	2.98205e+06	2.38889e+06	5290917	5.17531e+06	4.40393e+06	6.08301e+06	7.02355e+06	4.0611e+06	1.88017e+06	3.30362e+06	2880879	5.28289e+06	3697161	4.27324e+06	8676850	17222070	7.97825e+06
Monoethyl carbonate		HMDB0031232	105349	50849	NA	34604040	32366062	29686998	28032482	33920504	37309564	37693416	62224104	26912984	29790164	39323216	35144460	36549092	78211616	48374172	64851360	47586364	55510288	47541176	95735264	40326796	34245000	88165760	37155892	33809576	42927720	39803268	31499218	40889440	28879110	28979262	36533772	24347202	30594836	27474300	36138668	28200484	18962858	24667236	19444306	50020192	24658152	19440104	25157594
Morachalcone A		HMDB0040306	9862769	NA	NA	34603.2	21859.4	32142.9	30793.5	29032.4	30646.3	32753.5	28928.7	26253.6	29156.7	33137.4	30177.1	34340.1	30020	37457.9	37909.2	35543	37206.3	42986.1	62836.8	45690.9	33397.3	46512.1	44434.3	38034.6	40741.5	32746.2	29033.5	37974.5	21926.9	27766.9	42830.6	38999.8	28534.6	22753.4	24995.9	23249.5	32167.5	38518.3	38379	42153.3	30342.7	29325	37245.7
muco-Inositol		HMDB0062138	NA	27987	C06152	1540254	1.67919e+06	1.9796e+06	1825421	1.95816e+06	1.82696e+06	1.61079e+06	1.76032e+06	1.97601e+06	1.662e+06	1.72949e+06	1.70587e+06	1.84115e+06	2.77634e+06	1564488	1714890	1.31061e+06	1.01264e+06	1.48834e+06	1075626	1.55374e+06	1.28646e+06	1.225e+06	1.78276e+06	1.41583e+06	2.08046e+06	2179152	1832286	1.87681e+06	1.84927e+06	1.47229e+06	1.51973e+06	2.01794e+06	1.53132e+06	1.44439e+06	1.92226e+06	1.61617e+06	1810911	1.67998e+06	1.90648e+06	1.66314e+06	1.67312e+06	1.5588e+06	1.882e+06
myo-Inositol		HMDB0000211	NA	17268	C00137	1540254	1.67919e+06	1.9796e+06	1825421	1.95816e+06	1.82696e+06	1.61079e+06	1.76032e+06	1.97601e+06	1.662e+06	1.72949e+06	1.70587e+06	1.84115e+06	2.77634e+06	1564488	1714890	1.31061e+06	1.01264e+06	1.48834e+06	1075626	1.55374e+06	1.28646e+06	1.225e+06	1.78276e+06	1.41583e+06	2.08046e+06	2179152	1832286	1.87681e+06	1.84927e+06	1.47229e+06	1.51973e+06	2.01794e+06	1.53132e+06	1.44439e+06	1.92226e+06	1.61617e+06	1810911	1.67998e+06	1.90648e+06	1.66314e+06	1.67312e+06	1.5588e+06	1.882e+06
Myrtenic acid		METPA1079	NA	25459	C11940	125608	137869	162940	113897	69438.4	111236	117134	113408	198233	166327	113129	95501.3	111009	147315	107696	60184.6	127233	122066	126081	85493.6	102991	85812.9	142585	174777	76043.9	70660.7	81507.4	79837	108682	119309	97758.3	119131	165126	126387	117883	174560	128250	242214	153779	147094	177844	156160	190980	161819
Myrtine		HMDB0030371	433955	NA	NA	22173.6	28588.2	36088.1	41721.1	26083	28621.8	35929.6	26325.3	44398.4	28047.7	57709	21199.7	32568.1	47395.6	47178.1	37037.6	39350.5	31557.2	43501.5	30107	29905.2	31201.5	40489.9	59699.5	27541.5	36362.4	20835.3	36348.1	36513.3	41101.9	62423.3	26936.2	28482.5	38131.6	18079.7	19509.9	22518	19080.5	29764.5	22112.7	20566.2	23980.3	32286.2	18213.7
N-(1-Deoxy-1-fructosyl)phenylalanine		HMDB0037846	101039148	136561	NA	13808.3	13933.5	17298.9	15028.7	11762.9	0	0	0	13207.2	38204.6	10867.5	8706.41	7350.39	27678.5	0	0	0	0	0	0	36755.2	12831.7	0	12038.9	0	10770.4	7351.74	5355.85	15044	0	6976.33	8358.04	24663.6	25843.4	8866.36	22621.7	12409.6	20572.5	16311.9	14772.5	18283.5	36397	33292	14602.1
N,2,3-Trimethyl-2-(1-methylethyl)butanamide		HMDB0036195	65300	NA	NA	112883	160964	164917	126684	101852	110730	131545	113529	140045	154951	169666	133161	127825	202686	140809	137802	176381	154981	116893	137555	130602	128166	166033	130682	112197	128061	124812	135765	139028	121257	130957	1172007	767771	493739	737478	710858	760653	806022	664825	756974	915775	548852	598446	770242
N2-Fructopyranosylarginine		HMDB0041541	75046985	NA	NA	48276.1	53859.3	49884.4	47843.6	30011.4	20279.9	14183.8	17330	42491.9	106020	39797.6	27114.2	22035.7	123048	13501.2	13826.4	11601	0	13574.3	0	94727.2	44277.6	13527.3	37426.5	13535	33201.6	27723.2	14732.6	66544.9	10576.3	21433.5	36473.8	63031.7	60494.3	46199.3	67990.4	35331.8	53576.1	66346.2	52846.7	72674.3	65608.6	89108.2	46754.7
N-Acetyl-2,3-dihydro-1H-pyrrole		HMDB0031163	10909522	NA	NA	115103	130366	97723	97635.9	111172	126286	62059.4	79497.4	121732	105891	106295	112470	103019	114550	82833.3	94169.4	121909	87640.8	75014.7	102994	84054.2	106682	83274.2	111011	96818.4	90942.4	81423.1	89552.9	120609	106551	126897	148684	117718	141509	149991	131721	159041	190374	166110	148949	166086	171075	197129	148022
N-Acetylserine		HMDB0002931	65249	45441	NA	5.80809e+06	7.06151e+06	6.62278e+06	5990323	7638704	7.46656e+06	7101270	10406814	7.93689e+06	5.67973e+06	5.66756e+06	6009460	6.16445e+06	5.69839e+06	7310123	11250793	11493082	9309820	8845775	14076279	6796778	6265097	12129724	6.51872e+06	4.82738e+06	7.73812e+06	5.51663e+06	5040238	7986673	5599903	6.00351e+06	5257871	6833903	6684500	6720563	8773508	5.01219e+06	5387662	6.56391e+06	6916141	5.76526e+06	5644493	6105444	8.1353e+06
N-Acryloylglycine		HMDB0001843	100321	NA	NA	2.70472e+06	2.59688e+06	2963935	2.94483e+06	2.69327e+06	3.41179e+06	3.54092e+06	3.54544e+06	2.92903e+06	2.81881e+06	3.29909e+06	2750800	3.44404e+06	2.90506e+06	3229938	3.60681e+06	3968073	4.00734e+06	4216474	5.67088e+06	4.77157e+06	3611308	4.6253e+06	4.73089e+06	4800854	4568997	3.15983e+06	3.1172e+06	3.60034e+06	2.51572e+06	2.77714e+06	4.18697e+06	3582345	2.55328e+06	2315090	2933072	2.84001e+06	2.70779e+06	3499983	4.15245e+06	4940586	2.33787e+06	2.76964e+06	3.48574e+06
n-Butyl acetate		HMDB0031325	31272	31328	C12304	2.28202e+06	2.44802e+06	2.67102e+06	2.37729e+06	1.93155e+06	2.6323e+06	2.47014e+06	2.29271e+06	2.73045e+06	2.28869e+06	1.81642e+06	2.91286e+06	2123246	2.36444e+06	3.60295e+06	1.21265e+06	2.30287e+06	2725161	2.07744e+06	2.60667e+06	2.36361e+06	2.30766e+06	2.52162e+06	2.78959e+06	2.28737e+06	1.12185e+06	2.00102e+06	1.85176e+06	2.33975e+06	2.17494e+06	1.74504e+06	5.44662e+06	5.28788e+06	8102586	5.45059e+06	5136677	5261508	5.85648e+06	7194426	4609864	5.51374e+06	5.88861e+06	7103756	7120424
N-Decanoylglycine		HMDB0013267	1712391	74430	NA	67893.2	37006.4	158230	85026.1	76668	103711	169821	154810	85753.5	148495	85632.1	119366	97100.5	117070	179482	110440	100962	106226	55260.1	56717.5	111105	115403	183824	207930	59450.8	144196	103657	117054	133525	102063	51188.1	41040.2	105132	19733.3	41367.1	40942.2	34123	92495.4	35184.9	23259.1	53124.9	25069.6	65756	0
Neocnidilide		HMDB0034450	5018391	NA	C17002	151667	125457	146408	122789	85130.3	115858	128881	98168.7	137868	129400	123148	102185	100871	126715	165295	93591.6	127904	128741	103532	117243	106050	126700	150913	131959	106466	83258.6	100243	96871.8	137405	128675	94347.1	95805.1	88245.5	50123.4	85965.7	102175	92384.1	103824	63369.8	133098	138871	97121	80252.8	93801.3
N-Ethyl trans-2-cis-6-nonadienamide		HMDB0032273	11309884	NA	C06551	55691.6	50090.5	59847.1	56345.2	32780.5	42912.7	71514.6	63176.4	57799.3	35530.9	118111	57174.5	38775	45702.3	108898	57400.1	53446.2	39112	60662.1	28769.4	34440.9	51182.5	122514	76868.9	35260.8	32087.9	36011.5	60429.4	85942.1	57421	26340.4	37942.1	27758.1	29898.3	32087.2	27690.3	38878.2	41120.3	30023.6	35142.8	46570.8	31356.8	46030.3	28148.6
Neurine		HMDB0031259	10042	NA	NA	9687871	7.01417e+06	6953654	7.6342e+06	9254060	8620787	9557932	11486076	7.30725e+06	8970975	6.31791e+06	9212638	9631406	12707172	9136225	10464087	7792087	15722678	8647095	26491730	12970433	7.49246e+06	31653146	7.03919e+06	4.98701e+06	6.72271e+06	6.72327e+06	7038440	10177327	6945660	4803615	7.07902e+06	6.91919e+06	8717695	8774675	9275999	10863603	9113033	8333219	6652077	7646654	5767221	9098299	7.33274e+06
N-Hexadecanoylpyrrolidine		HMDB0032740	247220	NA	NA	304608	152512	636280	265647	215199	297520	373600	543288	336942	411299	494802	441787	299656	520340	531811	269162	518805	548252	306502	268877	487711	438563	405205	613281	287084	615261	200966	587539	322640	274730	153986	356337	250659	103847	92142.8	179001	366416	158631	131135	106855	288304	42200.7	254918	113426
N-lactoyl-Glycine		HMDB0062183	101947384	NA	NA	5.80809e+06	7.06151e+06	6.62278e+06	5990323	7638704	7.46656e+06	7101270	10406814	7.93689e+06	5.67973e+06	5.66756e+06	6009460	6.16445e+06	5.69839e+06	7310123	11250793	11493082	9309820	8845775	14076279	6796778	6265097	12129724	6.51872e+06	4.82738e+06	7.73812e+06	5.51663e+06	5040238	7986673	5599903	6.00351e+06	5257871	6833903	6684500	6720563	8773508	5.01219e+06	5387662	6.56391e+06	6916141	5.76526e+06	5644493	6105444	8.1353e+06
N-lactoyl-Isoeucine		HMDB0062180	131770416	NA	NA	173498	164447	161661	128535	111052	103185	140700	136218	163703	131437	198614	167383	124118	145176	182277	80296.6	147206	144879	127018	148255	198248	117622	169483	143889	112854	85446.8	141604	129902	143257	136174	109569	131737	165731	228627	154641	144871	136930	213798	170355	193055	207393	257604	170982	249689
N-Methyl-D-aspartic acid		HMDB0002393	22880	31882	C12269	5.80809e+06	7.06151e+06	6.62278e+06	5990323	7638704	7.46656e+06	7101270	10406814	7.93689e+06	5.67973e+06	5.66756e+06	6009460	6.16445e+06	5.69839e+06	7310123	11250793	11493082	9309820	8845775	14076279	6796778	6265097	12129724	6.51872e+06	4.82738e+06	7.73812e+06	5.51663e+06	5040238	7986673	5599903	6.00351e+06	5257871	6833903	6684500	6720563	8773508	5.01219e+06	5387662	6.56391e+06	6916141	5.76526e+06	5644493	6105444	8.1353e+06
N-Nonanoylglycine		HMDB0013279	10176752	74439	NA	95345.9	78394	237515	110990	0	114396	256605	222614	188806	160406	126705	135180	101221	110366	308430	112435	145930	67802.2	72984.8	60153.4	101516	87222.6	240849	285744	73894.1	154437	130461	102508	181089	135234	54321.7	0	103438	0	57478.7	0	39016.7	66880.1	0	0	62922.9	0	0	0
Nonate		HMDB0011717	16058309	88404	NA	294161	292649	362573	312789	276612	353848	272464	259481	393119	293483	319734	351261	262288	349839	349010	166447	311050	322700	255503	271450	308555	225864	365407	437670	201540	246329	290636	247008	347563	270861	236362	197998	171490	187606	135506	174254	170424	241181	161755	196161	279967	248208	281390	219395
Nonyl acetate		HMDB0040266	8918	87511	NA	1.69237e+06	2.03593e+06	1.91863e+06	1.48279e+06	1.27121e+06	1.57707e+06	2.09075e+06	1.89838e+06	1.92771e+06	1.75543e+06	1.51771e+06	1.82407e+06	1.44055e+06	1.84583e+06	2.4127e+06	1.11724e+06	1521156	2.04302e+06	1609977	1.77459e+06	2.2223e+06	1.56491e+06	2.2154e+06	1.98399e+06	1.73029e+06	1.23412e+06	1.65599e+06	1.2052e+06	1.69875e+06	1.35488e+06	1.21874e+06	298319	420139	511203	302649	268375	350309	670715	291895	289214	395764	515219	399649	605233
Norambreinolide		HMDB0035293	61129	NA	NA	57686.3	42243	55680.2	64115.4	42503.2	48020.7	54456.1	49915.8	39639.3	60338.1	44077.1	57743.2	72149.4	55273.9	49064	37872.8	46149.4	67021.4	45292.4	49797.5	59586.7	47713.2	75207	67767.6	44484.4	78105.1	53304.5	40708.8	73095.9	47636.5	41799.9	34086.3	42438.1	59635.5	27559.1	40490.9	39147.1	40195.3	33113.7	35500.3	62696.6	44071.9	70802.5	28407.8
N-Palmitoylsphingosine		HMDB0000790	5353456	NA	NA	115073	112101	158369	112712	66707.6	117559	109026	55019.9	94244.5	140835	114817	99181.4	146651	81756.2	106745	99444.1	63003.3	83140.8	52667.3	132390	74584.7	125858	104011	95401.7	111306	142383	135773	99949.2	185722	124468	113957	148115	105084	154304	92896.9	65033.5	134623	173826	117991	99933.8	93242.1	157777	105844	69982.4
N-Vinyl-2-pyrrolidone		HMDB0033843	131751496	NA	NA	115103	130366	97723	97635.9	111172	126286	62059.4	79497.4	121732	105891	106295	112470	103019	114550	82833.3	94169.4	121909	87640.8	75014.7	102994	84054.2	106682	83274.2	111011	96818.4	90942.4	81423.1	89552.9	120609	106551	126897	148684	117718	141509	149991	131721	159041	190374	166110	148949	166086	171075	197129	148022
O-Acetyl-L-serine	identified+fragment	HMDB0003011	99478	17981	C00979	5.80809e+06	7.06151e+06	6.62278e+06	5990323	7638704	7.46656e+06	7101270	10406814	7.93689e+06	5.67973e+06	5.66756e+06	6009460	6.16445e+06	5.69839e+06	7310123	11250793	11493082	9309820	8845775	14076279	6796778	6265097	12129724	6.51872e+06	4.82738e+06	7.73812e+06	5.51663e+06	5040238	7986673	5599903	6.00351e+06	5257871	6833903	6684500	6720563	8773508	5.01219e+06	5387662	6.56391e+06	6916141	5.76526e+06	5644493	6105444	8.1353e+06
Obtusilic acid		HMDB04980	5282726	32380	NA	403094	487353	495635	440662	329030	444513	463203	477301	503970	457144	413035	485976	370373	462660	608536	244537	382065	482415	408085	507728	526754	430094	599832	514565	407043	323168	416666	333202	431254	339426	338844	164164	125509	173980	161805	126286	154237	207961	131391	130946	231210	181746	183962	171513
Octan-3-one		HMDB0031295	246728	80946	C17145	78455.7	65344.3	83608.7	64943.9	79512.6	59021.4	76686.4	92972.8	74609.5	87474	75396.3	67367.8	63850.3	54698.8	79092.8	38729	47039.2	65392.8	44689	66409.2	63031.6	53986.8	98142.6	87254.1	62420.1	47849	83815.5	49708.2	78847.6	48770.1	41515	62052.1	49549.7	69056.4	60690.3	35418	50869.3	53883.8	58666.7	42025.4	53045.4	79185.9	69060.6	54148.4
Octanal propyleneglycol acetal		HMDB0032448	560109	NA	NA	1.69237e+06	2.03593e+06	1.91863e+06	1.48279e+06	1.27121e+06	1.57707e+06	2.09075e+06	1.89838e+06	1.92771e+06	1.75543e+06	1.51771e+06	1.82407e+06	1.44055e+06	1.84583e+06	2.4127e+06	1.11724e+06	1521156	2.04302e+06	1609977	1.77459e+06	2.2223e+06	1.56491e+06	2.2154e+06	1.98399e+06	1.73029e+06	1.23412e+06	1.65599e+06	1.2052e+06	1.69875e+06	1.35488e+06	1.21874e+06	298319	420139	511203	302649	268375	350309	670715	291895	289214	395764	515219	399649	605233
Octyl acetate		HMDB0038602	8164	87495	NA	9949007	11504798	11419062	9327990	7611035	10557322	12258934	11924596	11121203	10087879	8976714	11839756	8963184	10683619	14898223	6.08635e+06	9378611	12510601	10533930	10980307	12879971	9452784	13969028	11505806	9738459	7.43292e+06	9378756	7251482	9339049	8226159	6.97687e+06	2.77864e+06	3.51156e+06	5.40678e+06	3.36879e+06	2.54327e+06	3.71239e+06	5.53706e+06	3.01635e+06	2.83467e+06	3.79552e+06	4814188	3.59266e+06	5.48434e+06
Octyl formate		HMDB0038603	8176	87496	NA	31059080	36333212	35153816	31346394	26063910	34265028	37671056	37614436	32756472	31222842	25990618	35452616	24216608	31566360	49759612	18183924	29314668	36772668	29634554	34388456	37593128	31483394	42794468	35495564	31823804	20526698	28560828	22274504	30226706	26423828	20904814	21439336	16472399	28092744	17140688	14065325	19779730	23878034	20280954	17347108	17172318	22708688	19138784	27444522
Octyl propanoate		HMDB0034134	61096	NA	NA	1.69237e+06	2.03593e+06	1.91863e+06	1.48279e+06	1.27121e+06	1.57707e+06	2.09075e+06	1.89838e+06	1.92771e+06	1.75543e+06	1.51771e+06	1.82407e+06	1.44055e+06	1.84583e+06	2.4127e+06	1.11724e+06	1521156	2.04302e+06	1609977	1.77459e+06	2.2223e+06	1.56491e+06	2.2154e+06	1.98399e+06	1.73029e+06	1.23412e+06	1.65599e+06	1.2052e+06	1.69875e+06	1.35488e+06	1.21874e+06	298319	420139	511203	302649	268375	350309	670715	291895	289214	395764	515219	399649	605233
Oenanthic ether		HMDB0000798	7797	86618	NA	31059080	36333212	35153816	31346394	26063910	34265028	37671056	37614436	32756472	31222842	25990618	35452616	24216608	31566360	49759612	18183924	29314668	36772668	29634554	34388456	37593128	31483394	42794468	35495564	31823804	20526698	28560828	22274504	30226706	26423828	20904814	21439336	16472399	28092744	17140688	14065325	19779730	23878034	20280954	17347108	17172318	22708688	19138784	27444522
O-glutaroyl-L-carnitine		HMDB0013130	71317118	82952	NA	61539.4	84365.9	57276.1	68522.5	58487.3	65085.5	65387.6	51614.3	64526.4	105408	40488.7	53210.1	49317.7	91292.4	56845.3	40920.5	50178.2	58866.3	53596.9	76302.9	61046.4	60727.8	85765.6	60084.7	52010.9	75799.9	71936.7	46465.2	50083.7	37181	59813.2	16415.4	17040.9	14731.6	21590.2	8021.12	27977	19376.9	21120.1	15039.4	29810.9	21883.5	29178.1	18935.7
Oleamide	identified	HMDB0002117	5283387	116314	C19670	126904	105916	203795	148259	86432.7	82130.4	204865	146854	140634	87886.7	148770	174021	95025.4	89469	239920	80549.4	156809	98769.6	159954	69765.4	132214	143397	149356	299067	91614.7	150135	83161	129189	123809	129774	91277.8	72408.5	73058.5	39612.9	57882.4	60785.5	72792.9	72851.3	46313.7	56030.8	97090.7	57004.6	102741	44538.6
O-Methylcorypalline		HMDB0029370	27694	769975	NA	32420.9	43280.4	26206.3	49080.1	20982.1	22069	26640.2	20776.8	50481.2	56027.7	53665.4	17431.4	28567	23165.1	34205.3	30951.5	25629	26219.5	24845.2	33385.4	20806.8	31960.3	34840.1	31967.8	26431.4	18950.6	21595.4	22393.1	30885.8	23951.7	23900.5	33052.4	40310.4	48553.1	59228.2	57792.9	54889.8	75622.8	46341.9	42194.2	34459.3	42431.4	113727	50714
o-Toluate		HMDB0002340	8373	36632	C07215	68708.7	43528.7	48824.3	60176.8	52616.3	44124.8	56966.1	53439.2	87107.1	48783.8	38835.6	67959.7	41229.5	70931.5	102748	35358.7	59270.8	75816.7	48448.1	51040.8	47556.7	48478.1	70897.2	80392.3	44660.4	42313.2	64034.5	50219.4	82217.8	60804.1	53950.5	44770.6	35554.1	42831.3	32625.2	34227.4	42066.8	40043.4	40433.9	37215.5	34516.2	53182.6	56201.9	46961.7
Oxalic acid dibutyl ester		HMDB0040196	16306	NA	NA	173498	164447	161661	128535	111052	103185	140700	136218	163703	131437	198614	167383	124118	145176	182277	80296.6	147206	144879	127018	148255	198248	117622	169483	143889	112854	85446.8	141604	129902	143257	136174	109569	131737	165731	228627	154641	144871	136930	213798	170355	193055	207393	257604	170982	249689
p-Anisaldehyde		HMDB0029686	31244	28235	C10761	68708.7	43528.7	48824.3	60176.8	52616.3	44124.8	56966.1	53439.2	87107.1	48783.8	38835.6	67959.7	41229.5	70931.5	102748	35358.7	59270.8	75816.7	48448.1	51040.8	47556.7	48478.1	70897.2	80392.3	44660.4	42313.2	64034.5	50219.4	82217.8	60804.1	53950.5	44770.6	35554.1	42831.3	32625.2	34227.4	42066.8	40043.4	40433.9	37215.5	34516.2	53182.6	56201.9	46961.7
Paraldehyde		HMDB0032456	31264	27909	C07834	325808	397432	341500	309214	236865	242158	333978	275568	467726	339154	344064	309472	264954	371445	366957	203836	334007	327211	252096	272780	307163	293697	376911	401865	202274	237681	257716	213396	309933	338272	241916	120140	114052	122455	107787	123662	93379.2	107378	98495.5	152286	166687	134491	124153	123728
PC(14:0/18:2(9Z,12Z))		HMDB0007874	24778624	NA	C00157	99717	100006	96117.1	116152	95027.2	122044	146950	0	80028.7	130931	140982	106839	215926	68258	75276.7	0	64501	0	69847.6	116684	62155.9	63614.7	106226	163367	61365	0	0	106700	68884	96444.4	130846	148694	192396	198908	229156	99251.4	140855	146202	163574	121468	63428.2	205203	276166	96171.9
PC(14:0/20:3(5Z,8Z,11Z))		HMDB0007881	53478605	NA	C00157	2.47514e+06	2.54681e+06	3003003	2.44109e+06	1.57812e+06	1645079	1.7881e+06	959677	2.56624e+06	3.32044e+06	2.79648e+06	2.42241e+06	3.01843e+06	1.28566e+06	1892953	904199	1.03953e+06	1.36732e+06	1.23429e+06	1.73106e+06	1.1542e+06	1.63655e+06	2.27911e+06	3.48349e+06	2.06981e+06	759636	1.65418e+06	1.72619e+06	2.88679e+06	1.789e+06	2.08979e+06	2.8643e+06	3.40442e+06	3297942	3.10132e+06	2.55636e+06	3.12724e+06	2.75434e+06	3.52987e+06	3908393	2.00688e+06	3.14068e+06	2936082	2.19982e+06
PC(14:0/20:3(8Z,11Z,14Z))		HMDB0007882	52922230	NA	C00157	2.47514e+06	2.54681e+06	3003003	2.44109e+06	1.57812e+06	1645079	1.7881e+06	959677	2.56624e+06	3.32044e+06	2.79648e+06	2.42241e+06	3.01843e+06	1.28566e+06	1892953	904199	1.03953e+06	1.36732e+06	1.23429e+06	1.73106e+06	1.1542e+06	1.63655e+06	2.27911e+06	3.48349e+06	2.06981e+06	759636	1.65418e+06	1.72619e+06	2.88679e+06	1.789e+06	2.08979e+06	2.8643e+06	3.40442e+06	3297942	3.10132e+06	2.55636e+06	3.12724e+06	2.75434e+06	3.52987e+06	3908393	2.00688e+06	3.14068e+06	2936082	2.19982e+06
PC(14:0/22:5(4Z,7Z,10Z,13Z,16Z))		HMDB0007890	53478611	NA	C00157	584459	704531	667824	592126	498663	421717	451011	369307	571895	776582	758064	489118	909377	475407	475404	276108	281841	407284	371465	479263	476592	596666	606909	797803	626099	276790	434778	373829	909031	453628	492341	826731	897623	685136	758415	616120	716094	699093	801495	930267	603201	800888	736891	602221
PC(14:0/22:5(7Z,10Z,13Z,16Z,19Z))		HMDB0007891	53478613	NA	C00157	584459	704531	667824	592126	498663	421717	451011	369307	571895	776582	758064	489118	909377	475407	475404	276108	281841	407284	371465	479263	476592	596666	606909	797803	626099	276790	434778	373829	909031	453628	492341	826731	897623	685136	758415	616120	716094	699093	801495	930267	603201	800888	736891	602221
PC(14:1(9Z)/18:1(11Z))		HMDB0007905	53478623	NA	C00157	99717	100006	96117.1	116152	95027.2	122044	146950	0	80028.7	130931	140982	106839	215926	68258	75276.7	0	64501	0	69847.6	116684	62155.9	63614.7	106226	163367	61365	0	0	106700	68884	96444.4	130846	148694	192396	198908	229156	99251.4	140855	146202	163574	121468	63428.2	205203	276166	96171.9
PC(14:1(9Z)/18:1(9Z))		HMDB0007906	52922262	NA	C00157	99717	100006	96117.1	116152	95027.2	122044	146950	0	80028.7	130931	140982	106839	215926	68258	75276.7	0	64501	0	69847.6	116684	62155.9	63614.7	106226	163367	61365	0	0	106700	68884	96444.4	130846	148694	192396	198908	229156	99251.4	140855	146202	163574	121468	63428.2	205203	276166	96171.9
PC(14:1(9Z)/20:2(11Z,14Z))		HMDB0007913	52922280	NA	C00157	2.47514e+06	2.54681e+06	3003003	2.44109e+06	1.57812e+06	1645079	1.7881e+06	959677	2.56624e+06	3.32044e+06	2.79648e+06	2.42241e+06	3.01843e+06	1.28566e+06	1892953	904199	1.03953e+06	1.36732e+06	1.23429e+06	1.73106e+06	1.1542e+06	1.63655e+06	2.27911e+06	3.48349e+06	2.06981e+06	759636	1.65418e+06	1.72619e+06	2.88679e+06	1.789e+06	2.08979e+06	2.8643e+06	3.40442e+06	3297942	3.10132e+06	2.55636e+06	3.12724e+06	2.75434e+06	3.52987e+06	3908393	2.00688e+06	3.14068e+06	2936082	2.19982e+06
PC(14:1(9Z)/22:2(13Z,16Z))		HMDB0007921	52922294	NA	C00157	4188784	3.21494e+06	4452667	5074868	2.43301e+06	2114435	2.65676e+06	1.09946e+06	4224186	4.13467e+06	2.92945e+06	3.98507e+06	3.30104e+06	1.73917e+06	2.83136e+06	1.0896e+06	1.41436e+06	1.96195e+06	1.1876e+06	2.82548e+06	1424886	1549627	2.72531e+06	3.08932e+06	2370816	944797	1.65198e+06	2.6302e+06	2608023	2837210	2.86574e+06	3.18586e+06	3.16478e+06	5.67238e+06	4.08152e+06	3110881	3.34418e+06	3.97054e+06	3.91268e+06	3.71043e+06	2.25589e+06	5.34485e+06	5714502	3.33736e+06
PC(14:1(9Z)/22:4(7Z,10Z,13Z,16Z))		HMDB0007922	52922296	NA	C00157	584459	704531	667824	592126	498663	421717	451011	369307	571895	776582	758064	489118	909377	475407	475404	276108	281841	407284	371465	479263	476592	596666	606909	797803	626099	276790	434778	373829	909031	453628	492341	826731	897623	685136	758415	616120	716094	699093	801495	930267	603201	800888	736891	602221
PC(16:0/18:3(6Z,9Z,12Z))		HMDB0007974	24778699	NA	C00157	2.47514e+06	2.54681e+06	3003003	2.44109e+06	1.57812e+06	1645079	1.7881e+06	959677	2.56624e+06	3.32044e+06	2.79648e+06	2.42241e+06	3.01843e+06	1.28566e+06	1892953	904199	1.03953e+06	1.36732e+06	1.23429e+06	1.73106e+06	1.1542e+06	1.63655e+06	2.27911e+06	3.48349e+06	2.06981e+06	759636	1.65418e+06	1.72619e+06	2.88679e+06	1.789e+06	2.08979e+06	2.8643e+06	3.40442e+06	3297942	3.10132e+06	2.55636e+06	3.12724e+06	2.75434e+06	3.52987e+06	3908393	2.00688e+06	3.14068e+06	2936082	2.19982e+06
PC(16:0/18:3(9Z,12Z,15Z))		HMDB0007975	24778702	NA	C00157	2.47514e+06	2.54681e+06	3003003	2.44109e+06	1.57812e+06	1645079	1.7881e+06	959677	2.56624e+06	3.32044e+06	2.79648e+06	2.42241e+06	3.01843e+06	1.28566e+06	1892953	904199	1.03953e+06	1.36732e+06	1.23429e+06	1.73106e+06	1.1542e+06	1.63655e+06	2.27911e+06	3.48349e+06	2.06981e+06	759636	1.65418e+06	1.72619e+06	2.88679e+06	1.789e+06	2.08979e+06	2.8643e+06	3.40442e+06	3297942	3.10132e+06	2.55636e+06	3.12724e+06	2.75434e+06	3.52987e+06	3908393	2.00688e+06	3.14068e+06	2936082	2.19982e+06
PC(16:0/20:3(5Z,8Z,11Z))		HMDB0007980	24778715	NA	C00157	4188784	3.21494e+06	4452667	5074868	2.43301e+06	2114435	2.65676e+06	1.09946e+06	4224186	4.13467e+06	2.92945e+06	3.98507e+06	3.30104e+06	1.73917e+06	2.83136e+06	1.0896e+06	1.41436e+06	1.96195e+06	1.1876e+06	2.82548e+06	1424886	1549627	2.72531e+06	3.08932e+06	2370816	944797	1.65198e+06	2.6302e+06	2608023	2837210	2.86574e+06	3.18586e+06	3.16478e+06	5.67238e+06	4.08152e+06	3110881	3.34418e+06	3.97054e+06	3.91268e+06	3.71043e+06	2.25589e+06	5.34485e+06	5714502	3.33736e+06
PC(16:0/20:3(8Z,11Z,14Z))		HMDB0007981	24778719	NA	C00157	4188784	3.21494e+06	4452667	5074868	2.43301e+06	2114435	2.65676e+06	1.09946e+06	4224186	4.13467e+06	2.92945e+06	3.98507e+06	3.30104e+06	1.73917e+06	2.83136e+06	1.0896e+06	1.41436e+06	1.96195e+06	1.1876e+06	2.82548e+06	1424886	1549627	2.72531e+06	3.08932e+06	2370816	944797	1.65198e+06	2.6302e+06	2608023	2837210	2.86574e+06	3.18586e+06	3.16478e+06	5.67238e+06	4.08152e+06	3110881	3.34418e+06	3.97054e+06	3.91268e+06	3.71043e+06	2.25589e+06	5.34485e+06	5714502	3.33736e+06
PC(16:0/20:5(5Z,8Z,11Z,14Z,17Z))		HMDB0007984	24778723	NA	C00157	584459	704531	667824	592126	498663	421717	451011	369307	571895	776582	758064	489118	909377	475407	475404	276108	281841	407284	371465	479263	476592	596666	606909	797803	626099	276790	434778	373829	909031	453628	492341	826731	897623	685136	758415	616120	716094	699093	801495	930267	603201	800888	736891	602221
PC(16:0/22:5(4Z,7Z,10Z,13Z,16Z))		HMDB0007989	24778735	NA	C00157	267847	260275	393747	336116	312850	222248	217440	206845	354374	245541	230077	235594	357322	337598	275191	207022	131355	169809	131107	187298	221917	217946	243504	300543	188024	164060	242910	211634	380500	249883	269415	291745	511028	346366	313611	239162	318964	367570	317045	348699	247092	382992	352045	308047
PC(16:0/22:5(7Z,10Z,13Z,16Z,19Z))		HMDB0007990	24778737	NA	C00157	267847	260275	393747	336116	312850	222248	217440	206845	354374	245541	230077	235594	357322	337598	275191	207022	131355	169809	131107	187298	221917	217946	243504	300543	188024	164060	242910	211634	380500	249883	269415	291745	511028	346366	313611	239162	318964	367570	317045	348699	247092	382992	352045	308047
PC(16:1(9Z)/16:1(9Z))		HMDB0008002	24778764	NA	C00157	99717	100006	96117.1	116152	95027.2	122044	146950	0	80028.7	130931	140982	106839	215926	68258	75276.7	0	64501	0	69847.6	116684	62155.9	63614.7	106226	163367	61365	0	0	106700	68884	96444.4	130846	148694	192396	198908	229156	99251.4	140855	146202	163574	121468	63428.2	205203	276166	96171.9
PC(16:1(9Z)/18:2(9Z,12Z))		HMDB0008006	24778768	NA	C00157	2.47514e+06	2.54681e+06	3003003	2.44109e+06	1.57812e+06	1645079	1.7881e+06	959677	2.56624e+06	3.32044e+06	2.79648e+06	2.42241e+06	3.01843e+06	1.28566e+06	1892953	904199	1.03953e+06	1.36732e+06	1.23429e+06	1.73106e+06	1.1542e+06	1.63655e+06	2.27911e+06	3.48349e+06	2.06981e+06	759636	1.65418e+06	1.72619e+06	2.88679e+06	1.789e+06	2.08979e+06	2.8643e+06	3.40442e+06	3297942	3.10132e+06	2.55636e+06	3.12724e+06	2.75434e+06	3.52987e+06	3908393	2.00688e+06	3.14068e+06	2936082	2.19982e+06
PC(16:1(9Z)/20:2(11Z,14Z))		HMDB0008012	52922461	NA	C00157	4188784	3.21494e+06	4452667	5074868	2.43301e+06	2114435	2.65676e+06	1.09946e+06	4224186	4.13467e+06	2.92945e+06	3.98507e+06	3.30104e+06	1.73917e+06	2.83136e+06	1.0896e+06	1.41436e+06	1.96195e+06	1.1876e+06	2.82548e+06	1424886	1549627	2.72531e+06	3.08932e+06	2370816	944797	1.65198e+06	2.6302e+06	2608023	2837210	2.86574e+06	3.18586e+06	3.16478e+06	5.67238e+06	4.08152e+06	3110881	3.34418e+06	3.97054e+06	3.91268e+06	3.71043e+06	2.25589e+06	5.34485e+06	5714502	3.33736e+06
PC(16:1(9Z)/20:4(5Z,8Z,11Z,14Z))		HMDB0008015	24778771	NA	C00157	584459	704531	667824	592126	498663	421717	451011	369307	571895	776582	758064	489118	909377	475407	475404	276108	281841	407284	371465	479263	476592	596666	606909	797803	626099	276790	434778	373829	909031	453628	492341	826731	897623	685136	758415	616120	716094	699093	801495	930267	603201	800888	736891	602221
PC(16:1(9Z)/20:4(8Z,11Z,14Z,17Z))		HMDB0008016	53478681	NA	C00157	584459	704531	667824	592126	498663	421717	451011	369307	571895	776582	758064	489118	909377	475407	475404	276108	281841	407284	371465	479263	476592	596666	606909	797803	626099	276790	434778	373829	909031	453628	492341	826731	897623	685136	758415	616120	716094	699093	801495	930267	603201	800888	736891	602221
PC(16:1(9Z)/22:4(7Z,10Z,13Z,16Z))		HMDB0008021	52922475	NA	C00157	267847	260275	393747	336116	312850	222248	217440	206845	354374	245541	230077	235594	357322	337598	275191	207022	131355	169809	131107	187298	221917	217946	243504	300543	188024	164060	242910	211634	380500	249883	269415	291745	511028	346366	313611	239162	318964	367570	317045	348699	247092	382992	352045	308047
PC(18:0/18:3(6Z,9Z,12Z))		HMDB0008040	52922655	NA	C00157	4188784	3.21494e+06	4452667	5074868	2.43301e+06	2114435	2.65676e+06	1.09946e+06	4224186	4.13467e+06	2.92945e+06	3.98507e+06	3.30104e+06	1.73917e+06	2.83136e+06	1.0896e+06	1.41436e+06	1.96195e+06	1.1876e+06	2.82548e+06	1424886	1549627	2.72531e+06	3.08932e+06	2370816	944797	1.65198e+06	2.6302e+06	2608023	2837210	2.86574e+06	3.18586e+06	3.16478e+06	5.67238e+06	4.08152e+06	3110881	3.34418e+06	3.97054e+06	3.91268e+06	3.71043e+06	2.25589e+06	5.34485e+06	5714502	3.33736e+06
PC(18:0/18:3(9Z,12Z,15Z))		HMDB0008041	52922657	NA	C00157	4188784	3.21494e+06	4452667	5074868	2.43301e+06	2114435	2.65676e+06	1.09946e+06	4224186	4.13467e+06	2.92945e+06	3.98507e+06	3.30104e+06	1.73917e+06	2.83136e+06	1.0896e+06	1.41436e+06	1.96195e+06	1.1876e+06	2.82548e+06	1424886	1549627	2.72531e+06	3.08932e+06	2370816	944797	1.65198e+06	2.6302e+06	2608023	2837210	2.86574e+06	3.18586e+06	3.16478e+06	5.67238e+06	4.08152e+06	3110881	3.34418e+06	3.97054e+06	3.91268e+06	3.71043e+06	2.25589e+06	5.34485e+06	5714502	3.33736e+06
PC(18:0/20:5(5Z,8Z,11Z,14Z,17Z))		HMDB0008050	24778860	NA	C00157	267847	260275	393747	336116	312850	222248	217440	206845	354374	245541	230077	235594	357322	337598	275191	207022	131355	169809	131107	187298	221917	217946	243504	300543	188024	164060	242910	211634	380500	249883	269415	291745	511028	346366	313611	239162	318964	367570	317045	348699	247092	382992	352045	308047
PC(18:1(11Z)/14:1(9Z))		HMDB0008065	53478713	NA	C00157	99717	100006	96117.1	116152	95027.2	122044	146950	0	80028.7	130931	140982	106839	215926	68258	75276.7	0	64501	0	69847.6	116684	62155.9	63614.7	106226	163367	61365	0	0	106700	68884	96444.4	130846	148694	192396	198908	229156	99251.4	140855	146202	163574	121468	63428.2	205203	276166	96171.9
PC(18:1(11Z)/18:2(9Z,12Z))		HMDB0008072	53478723	NA	C00157	4188784	3.21494e+06	4452667	5074868	2.43301e+06	2114435	2.65676e+06	1.09946e+06	4224186	4.13467e+06	2.92945e+06	3.98507e+06	3.30104e+06	1.73917e+06	2.83136e+06	1.0896e+06	1.41436e+06	1.96195e+06	1.1876e+06	2.82548e+06	1424886	1549627	2.72531e+06	3.08932e+06	2370816	944797	1.65198e+06	2.6302e+06	2608023	2837210	2.86574e+06	3.18586e+06	3.16478e+06	5.67238e+06	4.08152e+06	3110881	3.34418e+06	3.97054e+06	3.91268e+06	3.71043e+06	2.25589e+06	5.34485e+06	5714502	3.33736e+06
PC(18:1(11Z)/18:4(6Z,9Z,12Z,15Z))		HMDB0008075	53478729	NA	C00157	584459	704531	667824	592126	498663	421717	451011	369307	571895	776582	758064	489118	909377	475407	475404	276108	281841	407284	371465	479263	476592	596666	606909	797803	626099	276790	434778	373829	909031	453628	492341	826731	897623	685136	758415	616120	716094	699093	801495	930267	603201	800888	736891	602221
PC(18:1(11Z)/20:4(5Z,8Z,11Z,14Z))		HMDB0008081	53478741	NA	C00157	267847	260275	393747	336116	312850	222248	217440	206845	354374	245541	230077	235594	357322	337598	275191	207022	131355	169809	131107	187298	221917	217946	243504	300543	188024	164060	242910	211634	380500	249883	269415	291745	511028	346366	313611	239162	318964	367570	317045	348699	247092	382992	352045	308047
PC(18:1(11Z)/20:4(8Z,11Z,14Z,17Z))		HMDB0008082	53478743	NA	C00157	267847	260275	393747	336116	312850	222248	217440	206845	354374	245541	230077	235594	357322	337598	275191	207022	131355	169809	131107	187298	221917	217946	243504	300543	188024	164060	242910	211634	380500	249883	269415	291745	511028	346366	313611	239162	318964	367570	317045	348699	247092	382992	352045	308047
PC(18:1(9Z)/14:1(9Z))		HMDB0008098	52922673	NA	C00157	99717	100006	96117.1	116152	95027.2	122044	146950	0	80028.7	130931	140982	106839	215926	68258	75276.7	0	64501	0	69847.6	116684	62155.9	63614.7	106226	163367	61365	0	0	106700	68884	96444.4	130846	148694	192396	198908	229156	99251.4	140855	146202	163574	121468	63428.2	205203	276166	96171.9
PC(18:1(9Z)/18:2(9Z,12Z))		HMDB0008105	24778939	NA	C00157	4188784	3.21494e+06	4452667	5074868	2.43301e+06	2114435	2.65676e+06	1.09946e+06	4224186	4.13467e+06	2.92945e+06	3.98507e+06	3.30104e+06	1.73917e+06	2.83136e+06	1.0896e+06	1.41436e+06	1.96195e+06	1.1876e+06	2.82548e+06	1424886	1549627	2.72531e+06	3.08932e+06	2370816	944797	1.65198e+06	2.6302e+06	2608023	2837210	2.86574e+06	3.18586e+06	3.16478e+06	5.67238e+06	4.08152e+06	3110881	3.34418e+06	3.97054e+06	3.91268e+06	3.71043e+06	2.25589e+06	5.34485e+06	5714502	3.33736e+06
PC(18:1(9Z)/18:4(6Z,9Z,12Z,15Z))		HMDB0008108	52922687	NA	C00157	584459	704531	667824	592126	498663	421717	451011	369307	571895	776582	758064	489118	909377	475407	475404	276108	281841	407284	371465	479263	476592	596666	606909	797803	626099	276790	434778	373829	909031	453628	492341	826731	897623	685136	758415	616120	716094	699093	801495	930267	603201	800888	736891	602221
PC(18:1(9Z)/20:4(5Z,8Z,11Z,14Z))		HMDB0008114	24778948	NA	C00157	267847	260275	393747	336116	312850	222248	217440	206845	354374	245541	230077	235594	357322	337598	275191	207022	131355	169809	131107	187298	221917	217946	243504	300543	188024	164060	242910	211634	380500	249883	269415	291745	511028	346366	313611	239162	318964	367570	317045	348699	247092	382992	352045	308047
PC(18:1(9Z)/20:4(8Z,11Z,14Z,17Z))		HMDB0008115	53478767	NA	C00157	267847	260275	393747	336116	312850	222248	217440	206845	354374	245541	230077	235594	357322	337598	275191	207022	131355	169809	131107	187298	221917	217946	243504	300543	188024	164060	242910	211634	380500	249883	269415	291745	511028	346366	313611	239162	318964	367570	317045	348699	247092	382992	352045	308047
PC(18:2(9Z,12Z)/14:0)		HMDB0008130	52922711	NA	C00157	99717	100006	96117.1	116152	95027.2	122044	146950	0	80028.7	130931	140982	106839	215926	68258	75276.7	0	64501	0	69847.6	116684	62155.9	63614.7	106226	163367	61365	0	0	106700	68884	96444.4	130846	148694	192396	198908	229156	99251.4	140855	146202	163574	121468	63428.2	205203	276166	96171.9
PC(18:2(9Z,12Z)/16:1(9Z))		HMDB0008134	52922719	NA	C00157	2.47514e+06	2.54681e+06	3003003	2.44109e+06	1.57812e+06	1645079	1.7881e+06	959677	2.56624e+06	3.32044e+06	2.79648e+06	2.42241e+06	3.01843e+06	1.28566e+06	1892953	904199	1.03953e+06	1.36732e+06	1.23429e+06	1.73106e+06	1.1542e+06	1.63655e+06	2.27911e+06	3.48349e+06	2.06981e+06	759636	1.65418e+06	1.72619e+06	2.88679e+06	1.789e+06	2.08979e+06	2.8643e+06	3.40442e+06	3297942	3.10132e+06	2.55636e+06	3.12724e+06	2.75434e+06	3.52987e+06	3908393	2.00688e+06	3.14068e+06	2936082	2.19982e+06
PC(18:2(9Z,12Z)/18:1(11Z))		HMDB0008136	53478785	NA	C00157	4188784	3.21494e+06	4452667	5074868	2.43301e+06	2114435	2.65676e+06	1.09946e+06	4224186	4.13467e+06	2.92945e+06	3.98507e+06	3.30104e+06	1.73917e+06	2.83136e+06	1.0896e+06	1.41436e+06	1.96195e+06	1.1876e+06	2.82548e+06	1424886	1549627	2.72531e+06	3.08932e+06	2370816	944797	1.65198e+06	2.6302e+06	2608023	2837210	2.86574e+06	3.18586e+06	3.16478e+06	5.67238e+06	4.08152e+06	3110881	3.34418e+06	3.97054e+06	3.91268e+06	3.71043e+06	2.25589e+06	5.34485e+06	5714502	3.33736e+06
PC(18:2(9Z,12Z)/18:1(9Z))		HMDB0008137	52922727	NA	C00157	4188784	3.21494e+06	4452667	5074868	2.43301e+06	2114435	2.65676e+06	1.09946e+06	4224186	4.13467e+06	2.92945e+06	3.98507e+06	3.30104e+06	1.73917e+06	2.83136e+06	1.0896e+06	1.41436e+06	1.96195e+06	1.1876e+06	2.82548e+06	1424886	1549627	2.72531e+06	3.08932e+06	2370816	944797	1.65198e+06	2.6302e+06	2608023	2837210	2.86574e+06	3.18586e+06	3.16478e+06	5.67238e+06	4.08152e+06	3110881	3.34418e+06	3.97054e+06	3.91268e+06	3.71043e+06	2.25589e+06	5.34485e+06	5714502	3.33736e+06
PC(18:2(9Z,12Z)/18:3(6Z,9Z,12Z))		HMDB0008140	52922729	NA	C00157	584459	704531	667824	592126	498663	421717	451011	369307	571895	776582	758064	489118	909377	475407	475404	276108	281841	407284	371465	479263	476592	596666	606909	797803	626099	276790	434778	373829	909031	453628	492341	826731	897623	685136	758415	616120	716094	699093	801495	930267	603201	800888	736891	602221
PC(18:2(9Z,12Z)/18:3(9Z,12Z,15Z))		HMDB0008141	52922731	NA	C00157	584459	704531	667824	592126	498663	421717	451011	369307	571895	776582	758064	489118	909377	475407	475404	276108	281841	407284	371465	479263	476592	596666	606909	797803	626099	276790	434778	373829	909031	453628	492341	826731	897623	685136	758415	616120	716094	699093	801495	930267	603201	800888	736891	602221
PC(18:2(9Z,12Z)/20:3(5Z,8Z,11Z))		HMDB0008139	53478787	NA	C00157	267847	260275	393747	336116	312850	222248	217440	206845	354374	245541	230077	235594	357322	337598	275191	207022	131355	169809	131107	187298	221917	217946	243504	300543	188024	164060	242910	211634	380500	249883	269415	291745	511028	346366	313611	239162	318964	367570	317045	348699	247092	382992	352045	308047
PC(18:2(9Z,12Z)/20:3(8Z,11Z,14Z))		HMDB0008146	52922745	NA	C00157	267847	260275	393747	336116	312850	222248	217440	206845	354374	245541	230077	235594	357322	337598	275191	207022	131355	169809	131107	187298	221917	217946	243504	300543	188024	164060	242910	211634	380500	249883	269415	291745	511028	346366	313611	239162	318964	367570	317045	348699	247092	382992	352045	308047
PC(18:3(6Z,9Z,12Z)/16:0)		HMDB0008166	52922771	NA	C00157	2.47514e+06	2.54681e+06	3003003	2.44109e+06	1.57812e+06	1645079	1.7881e+06	959677	2.56624e+06	3.32044e+06	2.79648e+06	2.42241e+06	3.01843e+06	1.28566e+06	1892953	904199	1.03953e+06	1.36732e+06	1.23429e+06	1.73106e+06	1.1542e+06	1.63655e+06	2.27911e+06	3.48349e+06	2.06981e+06	759636	1.65418e+06	1.72619e+06	2.88679e+06	1.789e+06	2.08979e+06	2.8643e+06	3.40442e+06	3297942	3.10132e+06	2.55636e+06	3.12724e+06	2.75434e+06	3.52987e+06	3908393	2.00688e+06	3.14068e+06	2936082	2.19982e+06
PC(18:3(6Z,9Z,12Z)/18:0)		HMDB0008168	52922781	NA	C00157	4188784	3.21494e+06	4452667	5074868	2.43301e+06	2114435	2.65676e+06	1.09946e+06	4224186	4.13467e+06	2.92945e+06	3.98507e+06	3.30104e+06	1.73917e+06	2.83136e+06	1.0896e+06	1.41436e+06	1.96195e+06	1.1876e+06	2.82548e+06	1424886	1549627	2.72531e+06	3.08932e+06	2370816	944797	1.65198e+06	2.6302e+06	2608023	2837210	2.86574e+06	3.18586e+06	3.16478e+06	5.67238e+06	4.08152e+06	3110881	3.34418e+06	3.97054e+06	3.91268e+06	3.71043e+06	2.25589e+06	5.34485e+06	5714502	3.33736e+06
PC(18:3(6Z,9Z,12Z)/18:2(9Z,12Z))		HMDB0008171	52922785	NA	C00157	584459	704531	667824	592126	498663	421717	451011	369307	571895	776582	758064	489118	909377	475407	475404	276108	281841	407284	371465	479263	476592	596666	606909	797803	626099	276790	434778	373829	909031	453628	492341	826731	897623	685136	758415	616120	716094	699093	801495	930267	603201	800888	736891	602221
PC(18:3(6Z,9Z,12Z)/20:2(11Z,14Z))		HMDB0008177	52922801	NA	C00157	267847	260275	393747	336116	312850	222248	217440	206845	354374	245541	230077	235594	357322	337598	275191	207022	131355	169809	131107	187298	221917	217946	243504	300543	188024	164060	242910	211634	380500	249883	269415	291745	511028	346366	313611	239162	318964	367570	317045	348699	247092	382992	352045	308047
PC(18:3(9Z,12Z,15Z)/16:0)		HMDB0008199	52922833	NA	C00157	2.47514e+06	2.54681e+06	3003003	2.44109e+06	1.57812e+06	1645079	1.7881e+06	959677	2.56624e+06	3.32044e+06	2.79648e+06	2.42241e+06	3.01843e+06	1.28566e+06	1892953	904199	1.03953e+06	1.36732e+06	1.23429e+06	1.73106e+06	1.1542e+06	1.63655e+06	2.27911e+06	3.48349e+06	2.06981e+06	759636	1.65418e+06	1.72619e+06	2.88679e+06	1.789e+06	2.08979e+06	2.8643e+06	3.40442e+06	3297942	3.10132e+06	2.55636e+06	3.12724e+06	2.75434e+06	3.52987e+06	3908393	2.00688e+06	3.14068e+06	2936082	2.19982e+06
PC(18:3(9Z,12Z,15Z)/18:0)		HMDB0008201	52922843	NA	C00157	4188784	3.21494e+06	4452667	5074868	2.43301e+06	2114435	2.65676e+06	1.09946e+06	4224186	4.13467e+06	2.92945e+06	3.98507e+06	3.30104e+06	1.73917e+06	2.83136e+06	1.0896e+06	1.41436e+06	1.96195e+06	1.1876e+06	2.82548e+06	1424886	1549627	2.72531e+06	3.08932e+06	2370816	944797	1.65198e+06	2.6302e+06	2608023	2837210	2.86574e+06	3.18586e+06	3.16478e+06	5.67238e+06	4.08152e+06	3110881	3.34418e+06	3.97054e+06	3.91268e+06	3.71043e+06	2.25589e+06	5.34485e+06	5714502	3.33736e+06
PC(18:3(9Z,12Z,15Z)/18:2(9Z,12Z))		HMDB0008204	52922845	NA	C00157	584459	704531	667824	592126	498663	421717	451011	369307	571895	776582	758064	489118	909377	475407	475404	276108	281841	407284	371465	479263	476592	596666	606909	797803	626099	276790	434778	373829	909031	453628	492341	826731	897623	685136	758415	616120	716094	699093	801495	930267	603201	800888	736891	602221
PC(18:3(9Z,12Z,15Z)/20:2(11Z,14Z))		HMDB0008210	52922859	NA	C00157	267847	260275	393747	336116	312850	222248	217440	206845	354374	245541	230077	235594	357322	337598	275191	207022	131355	169809	131107	187298	221917	217946	243504	300543	188024	164060	242910	211634	380500	249883	269415	291745	511028	346366	313611	239162	318964	367570	317045	348699	247092	382992	352045	308047
PC(18:4(6Z,9Z,12Z,15Z)/18:1(11Z))		HMDB0008235	53478855	NA	C00157	584459	704531	667824	592126	498663	421717	451011	369307	571895	776582	758064	489118	909377	475407	475404	276108	281841	407284	371465	479263	476592	596666	606909	797803	626099	276790	434778	373829	909031	453628	492341	826731	897623	685136	758415	616120	716094	699093	801495	930267	603201	800888	736891	602221
PC(18:4(6Z,9Z,12Z,15Z)/18:1(9Z))		HMDB0008236	52922903	NA	C00157	584459	704531	667824	592126	498663	421717	451011	369307	571895	776582	758064	489118	909377	475407	475404	276108	281841	407284	371465	479263	476592	596666	606909	797803	626099	276790	434778	373829	909031	453628	492341	826731	897623	685136	758415	616120	716094	699093	801495	930267	603201	800888	736891	602221
PC(18:4(6Z,9Z,12Z,15Z)/20:1(11Z))		HMDB0008242	52922919	NA	C00157	267847	260275	393747	336116	312850	222248	217440	206845	354374	245541	230077	235594	357322	337598	275191	207022	131355	169809	131107	187298	221917	217946	243504	300543	188024	164060	242910	211634	380500	249883	269415	291745	511028	346366	313611	239162	318964	367570	317045	348699	247092	382992	352045	308047
PC(18:4(6Z,9Z,12Z,15Z)/P-18:1(11Z))		HMDB0008260	53478875	NA	C00157	250927	276782	274782	226727	338116	165796	221134	186614	240311	245999	207130	191134	322347	129844	188501	153069	140677	196655	127878	154360	132873	193138	239658	208723	165144	83290.1	191035	162889	306118	259743	320321	256540	289118	266575	202001	269398	296702	321635	325615	256567	165090	241484	194525	217581
PC(18:4(6Z,9Z,12Z,15Z)/P-18:1(9Z))		HMDB0008261	53478877	NA	C00157	250927	276782	274782	226727	338116	165796	221134	186614	240311	245999	207130	191134	322347	129844	188501	153069	140677	196655	127878	154360	132873	193138	239658	208723	165144	83290.1	191035	162889	306118	259743	320321	256540	289118	266575	202001	269398	296702	321635	325615	256567	165090	241484	194525	217581
PC(20:1(11Z)/18:4(6Z,9Z,12Z,15Z))		HMDB0008306	52923121	NA	C00157	267847	260275	393747	336116	312850	222248	217440	206845	354374	245541	230077	235594	357322	337598	275191	207022	131355	169809	131107	187298	221917	217946	243504	300543	188024	164060	242910	211634	380500	249883	269415	291745	511028	346366	313611	239162	318964	367570	317045	348699	247092	382992	352045	308047
PC(20:2(11Z,14Z)/14:1(9Z))		HMDB0008329	52923155	NA	C00157	2.47514e+06	2.54681e+06	3003003	2.44109e+06	1.57812e+06	1645079	1.7881e+06	959677	2.56624e+06	3.32044e+06	2.79648e+06	2.42241e+06	3.01843e+06	1.28566e+06	1892953	904199	1.03953e+06	1.36732e+06	1.23429e+06	1.73106e+06	1.1542e+06	1.63655e+06	2.27911e+06	3.48349e+06	2.06981e+06	759636	1.65418e+06	1.72619e+06	2.88679e+06	1.789e+06	2.08979e+06	2.8643e+06	3.40442e+06	3297942	3.10132e+06	2.55636e+06	3.12724e+06	2.75434e+06	3.52987e+06	3908393	2.00688e+06	3.14068e+06	2936082	2.19982e+06
PC(20:2(11Z,14Z)/16:1(9Z))		HMDB0008332	52923163	NA	C00157	4188784	3.21494e+06	4452667	5074868	2.43301e+06	2114435	2.65676e+06	1.09946e+06	4224186	4.13467e+06	2.92945e+06	3.98507e+06	3.30104e+06	1.73917e+06	2.83136e+06	1.0896e+06	1.41436e+06	1.96195e+06	1.1876e+06	2.82548e+06	1424886	1549627	2.72531e+06	3.08932e+06	2370816	944797	1.65198e+06	2.6302e+06	2608023	2837210	2.86574e+06	3.18586e+06	3.16478e+06	5.67238e+06	4.08152e+06	3110881	3.34418e+06	3.97054e+06	3.91268e+06	3.71043e+06	2.25589e+06	5.34485e+06	5714502	3.33736e+06
PC(20:2(11Z,14Z)/18:3(6Z,9Z,12Z))		HMDB0008337	52923177	NA	C00157	267847	260275	393747	336116	312850	222248	217440	206845	354374	245541	230077	235594	357322	337598	275191	207022	131355	169809	131107	187298	221917	217946	243504	300543	188024	164060	242910	211634	380500	249883	269415	291745	511028	346366	313611	239162	318964	367570	317045	348699	247092	382992	352045	308047
PC(20:2(11Z,14Z)/18:3(9Z,12Z,15Z))		HMDB0008338	52923179	NA	C00157	267847	260275	393747	336116	312850	222248	217440	206845	354374	245541	230077	235594	357322	337598	275191	207022	131355	169809	131107	187298	221917	217946	243504	300543	188024	164060	242910	211634	380500	249883	269415	291745	511028	346366	313611	239162	318964	367570	317045	348699	247092	382992	352045	308047
PC(20:3(5Z,8Z,11Z)/14:0)		HMDB0008361	53478943	NA	C00157	2.47514e+06	2.54681e+06	3003003	2.44109e+06	1.57812e+06	1645079	1.7881e+06	959677	2.56624e+06	3.32044e+06	2.79648e+06	2.42241e+06	3.01843e+06	1.28566e+06	1892953	904199	1.03953e+06	1.36732e+06	1.23429e+06	1.73106e+06	1.1542e+06	1.63655e+06	2.27911e+06	3.48349e+06	2.06981e+06	759636	1.65418e+06	1.72619e+06	2.88679e+06	1.789e+06	2.08979e+06	2.8643e+06	3.40442e+06	3297942	3.10132e+06	2.55636e+06	3.12724e+06	2.75434e+06	3.52987e+06	3908393	2.00688e+06	3.14068e+06	2936082	2.19982e+06
PC(20:3(5Z,8Z,11Z)/16:0)		HMDB0008364	53478949	NA	C00157	4188784	3.21494e+06	4452667	5074868	2.43301e+06	2114435	2.65676e+06	1.09946e+06	4224186	4.13467e+06	2.92945e+06	3.98507e+06	3.30104e+06	1.73917e+06	2.83136e+06	1.0896e+06	1.41436e+06	1.96195e+06	1.1876e+06	2.82548e+06	1424886	1549627	2.72531e+06	3.08932e+06	2370816	944797	1.65198e+06	2.6302e+06	2608023	2837210	2.86574e+06	3.18586e+06	3.16478e+06	5.67238e+06	4.08152e+06	3110881	3.34418e+06	3.97054e+06	3.91268e+06	3.71043e+06	2.25589e+06	5.34485e+06	5714502	3.33736e+06
PC(20:3(5Z,8Z,11Z)/18:2(9Z,12Z))		HMDB0008369	53478959	NA	C00157	267847	260275	393747	336116	312850	222248	217440	206845	354374	245541	230077	235594	357322	337598	275191	207022	131355	169809	131107	187298	221917	217946	243504	300543	188024	164060	242910	211634	380500	249883	269415	291745	511028	346366	313611	239162	318964	367570	317045	348699	247092	382992	352045	308047
PC(20:3(8Z,11Z,14Z)/14:0)		HMDB0008394	52923213	NA	C00157	2.47514e+06	2.54681e+06	3003003	2.44109e+06	1.57812e+06	1645079	1.7881e+06	959677	2.56624e+06	3.32044e+06	2.79648e+06	2.42241e+06	3.01843e+06	1.28566e+06	1892953	904199	1.03953e+06	1.36732e+06	1.23429e+06	1.73106e+06	1.1542e+06	1.63655e+06	2.27911e+06	3.48349e+06	2.06981e+06	759636	1.65418e+06	1.72619e+06	2.88679e+06	1.789e+06	2.08979e+06	2.8643e+06	3.40442e+06	3297942	3.10132e+06	2.55636e+06	3.12724e+06	2.75434e+06	3.52987e+06	3908393	2.00688e+06	3.14068e+06	2936082	2.19982e+06
PC(20:3(8Z,11Z,14Z)/16:0)		HMDB0008397	52923221	NA	C00157	4188784	3.21494e+06	4452667	5074868	2.43301e+06	2114435	2.65676e+06	1.09946e+06	4224186	4.13467e+06	2.92945e+06	3.98507e+06	3.30104e+06	1.73917e+06	2.83136e+06	1.0896e+06	1.41436e+06	1.96195e+06	1.1876e+06	2.82548e+06	1424886	1549627	2.72531e+06	3.08932e+06	2370816	944797	1.65198e+06	2.6302e+06	2608023	2837210	2.86574e+06	3.18586e+06	3.16478e+06	5.67238e+06	4.08152e+06	3110881	3.34418e+06	3.97054e+06	3.91268e+06	3.71043e+06	2.25589e+06	5.34485e+06	5714502	3.33736e+06
PC(20:3(8Z,11Z,14Z)/18:2(9Z,12Z))		HMDB0008402	52923235	NA	C00157	267847	260275	393747	336116	312850	222248	217440	206845	354374	245541	230077	235594	357322	337598	275191	207022	131355	169809	131107	187298	221917	217946	243504	300543	188024	164060	242910	211634	380500	249883	269415	291745	511028	346366	313611	239162	318964	367570	317045	348699	247092	382992	352045	308047
PC(20:4(5Z,8Z,11Z,14Z)/16:1(9Z))		HMDB0008430	52923283	NA	C00157	584459	704531	667824	592126	498663	421717	451011	369307	571895	776582	758064	489118	909377	475407	475404	276108	281841	407284	371465	479263	476592	596666	606909	797803	626099	276790	434778	373829	909031	453628	492341	826731	897623	685136	758415	616120	716094	699093	801495	930267	603201	800888	736891	602221
PC(20:4(5Z,8Z,11Z,14Z)/18:1(11Z))		HMDB0008432	53479033	NA	C00157	267847	260275	393747	336116	312850	222248	217440	206845	354374	245541	230077	235594	357322	337598	275191	207022	131355	169809	131107	187298	221917	217946	243504	300543	188024	164060	242910	211634	380500	249883	269415	291745	511028	346366	313611	239162	318964	367570	317045	348699	247092	382992	352045	308047
PC(20:4(5Z,8Z,11Z,14Z)/18:1(9Z))		HMDB0008433	52923293	NA	C00157	267847	260275	393747	336116	312850	222248	217440	206845	354374	245541	230077	235594	357322	337598	275191	207022	131355	169809	131107	187298	221917	217946	243504	300543	188024	164060	242910	211634	380500	249883	269415	291745	511028	346366	313611	239162	318964	367570	317045	348699	247092	382992	352045	308047
PC(20:4(8Z,11Z,14Z,17Z)/16:1(9Z))		HMDB0008463	53479065	NA	C00157	584459	704531	667824	592126	498663	421717	451011	369307	571895	776582	758064	489118	909377	475407	475404	276108	281841	407284	371465	479263	476592	596666	606909	797803	626099	276790	434778	373829	909031	453628	492341	826731	897623	685136	758415	616120	716094	699093	801495	930267	603201	800888	736891	602221
PC(20:4(8Z,11Z,14Z,17Z)/18:1(11Z))		HMDB0008465	53479069	NA	C00157	267847	260275	393747	336116	312850	222248	217440	206845	354374	245541	230077	235594	357322	337598	275191	207022	131355	169809	131107	187298	221917	217946	243504	300543	188024	164060	242910	211634	380500	249883	269415	291745	511028	346366	313611	239162	318964	367570	317045	348699	247092	382992	352045	308047
PC(20:4(8Z,11Z,14Z,17Z)/18:1(9Z))		HMDB0008466	53479071	NA	C00157	267847	260275	393747	336116	312850	222248	217440	206845	354374	245541	230077	235594	357322	337598	275191	207022	131355	169809	131107	187298	221917	217946	243504	300543	188024	164060	242910	211634	380500	249883	269415	291745	511028	346366	313611	239162	318964	367570	317045	348699	247092	382992	352045	308047
PC(20:5(5Z,8Z,11Z,14Z,17Z)/16:0)		HMDB0008495	52923341	NA	C00157	584459	704531	667824	592126	498663	421717	451011	369307	571895	776582	758064	489118	909377	475407	475404	276108	281841	407284	371465	479263	476592	596666	606909	797803	626099	276790	434778	373829	909031	453628	492341	826731	897623	685136	758415	616120	716094	699093	801495	930267	603201	800888	736891	602221
PC(20:5(5Z,8Z,11Z,14Z,17Z)/18:0)		HMDB0008497	52923351	NA	C00157	267847	260275	393747	336116	312850	222248	217440	206845	354374	245541	230077	235594	357322	337598	275191	207022	131355	169809	131107	187298	221917	217946	243504	300543	188024	164060	242910	211634	380500	249883	269415	291745	511028	346366	313611	239162	318964	367570	317045	348699	247092	382992	352045	308047
PC(20:5(5Z,8Z,11Z,14Z,17Z)/P-16:0)		HMDB0008521	53479139	NA	C00157	250927	276782	274782	226727	338116	165796	221134	186614	240311	245999	207130	191134	322347	129844	188501	153069	140677	196655	127878	154360	132873	193138	239658	208723	165144	83290.1	191035	162889	306118	259743	320321	256540	289118	266575	202001	269398	296702	321635	325615	256567	165090	241484	194525	217581
PC(22:2(13Z,16Z)/14:1(9Z))		HMDB0008591	52923553	NA	C00157	4188784	3.21494e+06	4452667	5074868	2.43301e+06	2114435	2.65676e+06	1.09946e+06	4224186	4.13467e+06	2.92945e+06	3.98507e+06	3.30104e+06	1.73917e+06	2.83136e+06	1.0896e+06	1.41436e+06	1.96195e+06	1.1876e+06	2.82548e+06	1424886	1549627	2.72531e+06	3.08932e+06	2370816	944797	1.65198e+06	2.6302e+06	2608023	2837210	2.86574e+06	3.18586e+06	3.16478e+06	5.67238e+06	4.08152e+06	3110881	3.34418e+06	3.97054e+06	3.91268e+06	3.71043e+06	2.25589e+06	5.34485e+06	5714502	3.33736e+06
PC(22:4(7Z,10Z,13Z,16Z)/14:1(9Z))		HMDB0008624	52923615	NA	C00157	584459	704531	667824	592126	498663	421717	451011	369307	571895	776582	758064	489118	909377	475407	475404	276108	281841	407284	371465	479263	476592	596666	606909	797803	626099	276790	434778	373829	909031	453628	492341	826731	897623	685136	758415	616120	716094	699093	801495	930267	603201	800888	736891	602221
PC(22:4(7Z,10Z,13Z,16Z)/16:1(9Z))		HMDB0008627	52923623	NA	C00157	267847	260275	393747	336116	312850	222248	217440	206845	354374	245541	230077	235594	357322	337598	275191	207022	131355	169809	131107	187298	221917	217946	243504	300543	188024	164060	242910	211634	380500	249883	269415	291745	511028	346366	313611	239162	318964	367570	317045	348699	247092	382992	352045	308047
PC(22:5(4Z,7Z,10Z,13Z,16Z)/14:0)		HMDB0008656	53479275	NA	C00157	584459	704531	667824	592126	498663	421717	451011	369307	571895	776582	758064	489118	909377	475407	475404	276108	281841	407284	371465	479263	476592	596666	606909	797803	626099	276790	434778	373829	909031	453628	492341	826731	897623	685136	758415	616120	716094	699093	801495	930267	603201	800888	736891	602221
PC(22:5(4Z,7Z,10Z,13Z,16Z)/16:0)		HMDB0008659	53479281	NA	C00157	267847	260275	393747	336116	312850	222248	217440	206845	354374	245541	230077	235594	357322	337598	275191	207022	131355	169809	131107	187298	221917	217946	243504	300543	188024	164060	242910	211634	380500	249883	269415	291745	511028	346366	313611	239162	318964	367570	317045	348699	247092	382992	352045	308047
PC(22:5(7Z,10Z,13Z,16Z,19Z)/14:0)		HMDB0008689	53479341	NA	C00157	584459	704531	667824	592126	498663	421717	451011	369307	571895	776582	758064	489118	909377	475407	475404	276108	281841	407284	371465	479263	476592	596666	606909	797803	626099	276790	434778	373829	909031	453628	492341	826731	897623	685136	758415	616120	716094	699093	801495	930267	603201	800888	736891	602221
PC(22:5(7Z,10Z,13Z,16Z,19Z)/16:0)		HMDB0008692	53479347	NA	C00157	267847	260275	393747	336116	312850	222248	217440	206845	354374	245541	230077	235594	357322	337598	275191	207022	131355	169809	131107	187298	221917	217946	243504	300543	188024	164060	242910	211634	380500	249883	269415	291745	511028	346366	313611	239162	318964	367570	317045	348699	247092	382992	352045	308047
PC(P-16:0/20:5(5Z,8Z,11Z,14Z,17Z))		HMDB0011222	52923910	NA	NA	250927	276782	274782	226727	338116	165796	221134	186614	240311	245999	207130	191134	322347	129844	188501	153069	140677	196655	127878	154360	132873	193138	239658	208723	165144	83290.1	191035	162889	306118	259743	320321	256540	289118	266575	202001	269398	296702	321635	325615	256567	165090	241484	194525	217581
PC(P-18:1(11Z)/18:4(6Z,9Z,12Z,15Z))		HMDB0011280	53480751	NA	NA	250927	276782	274782	226727	338116	165796	221134	186614	240311	245999	207130	191134	322347	129844	188501	153069	140677	196655	127878	154360	132873	193138	239658	208723	165144	83290.1	191035	162889	306118	259743	320321	256540	289118	266575	202001	269398	296702	321635	325615	256567	165090	241484	194525	217581
PC(P-18:1(9Z)/18:4(6Z,9Z,12Z,15Z))		HMDB0011313	53480809	NA	NA	250927	276782	274782	226727	338116	165796	221134	186614	240311	245999	207130	191134	322347	129844	188501	153069	140677	196655	127878	154360	132873	193138	239658	208723	165144	83290.1	191035	162889	306118	259743	320321	256540	289118	266575	202001	269398	296702	321635	325615	256567	165090	241484	194525	217581
PE(15:0/20:2(11Z,14Z))		HMDB0008901	52924168	NA	C00350	99717	100006	96117.1	116152	95027.2	122044	146950	0	80028.7	130931	140982	106839	215926	68258	75276.7	0	64501	0	69847.6	116684	62155.9	63614.7	106226	163367	61365	0	0	106700	68884	96444.4	130846	148694	192396	198908	229156	99251.4	140855	146202	163574	121468	63428.2	205203	276166	96171.9
PE(20:2(11Z,14Z)/15:0)		HMDB0009285	52924576	NA	C00350	99717	100006	96117.1	116152	95027.2	122044	146950	0	80028.7	130931	140982	106839	215926	68258	75276.7	0	64501	0	69847.6	116684	62155.9	63614.7	106226	163367	61365	0	0	106700	68884	96444.4	130846	148694	192396	198908	229156	99251.4	140855	146202	163574	121468	63428.2	205203	276166	96171.9
PE(22:4(7Z,10Z,13Z,16Z)/P-18:0)		HMDB0009610	53479906	137318	C00350	781238	770634	573300	435615	876377	552806	754013	587017	618088	675880	506057	461117	765891	461644	799936	569034	591131	574942	305609	422233	237127	597522	531950	432497	323356	277960	556140	397180	628789	613901	623451	541038	509509	532515	348448	685632	551133	788214	540707	490819	437945	570753	426252	600466
PE(P-18:0/22:4(7Z,10Z,13Z,16Z))		HMDB0011391	52925094	NA	NA	781238	770634	573300	435615	876377	552806	754013	587017	618088	675880	506057	461117	765891	461644	799936	569034	591131	574942	305609	422233	237127	597522	531950	432497	323356	277960	556140	397180	628789	613901	623451	541038	509509	532515	348448	685632	551133	788214	540707	490819	437945	570753	426252	600466
Pelargonic acid		HMDB0000847	8158	29019	C01601	31059080	36333212	35153816	31346394	26063910	34265028	37671056	37614436	32756472	31222842	25990618	35452616	24216608	31566360	49759612	18183924	29314668	36772668	29634554	34388456	37593128	31483394	42794468	35495564	31823804	20526698	28560828	22274504	30226706	26423828	20904814	21439336	16472399	28092744	17140688	14065325	19779730	23878034	20280954	17347108	17172318	22708688	19138784	27444522
Pelletierine		HMDB0030324	3034881	NA	NA	52320.8	61739.3	101428	67150.9	60563.1	64199.4	67604.7	60784.1	70883.8	60191.7	93304.4	64410.6	52032.8	59532.5	89100.9	43664.7	75606.8	59970.1	60348.8	53988.4	61945.6	58399.6	77023.5	121753	47671.7	73549.5	58866.2	67264.2	75975.6	64832.2	48545.5	50179.4	55873.4	45179.2	39439.4	46051.3	42504.8	63464.7	45918.3	37959.7	59419.5	47484.8	76015.4	43499.8
Pent-2-enyl hexanoate		HMDB0032461	5363141	NA	NA	309034	320740	293821	269294	217104	283689	311343	362226	288594	268578	271059	298196	265667	311945	376786	205478	259773	331045	247427	291458	327829	265874	391031	354682	286991	228648	301005	247328	305922	248143	192236	79297.4	74478.3	86984.4	87988.8	61451.4	63170	86007.9	65822.3	57758.6	138894	79557.3	69502.4	59403.4
Pentyl 2-furyl ketone		HMDB0032462	61738	9642	C02088	125608	137869	162940	113897	69438.4	111236	117134	113408	198233	166327	113129	95501.3	111009	147315	107696	60184.6	127233	122066	126081	85493.6	102991	85812.9	142585	174777	76043.9	70660.7	81507.4	79837	108682	119309	97758.3	119131	165126	126387	117883	174560	128250	242214	153779	147094	177844	156160	190980	161819
Pentyl 3-methylbutanoate		HMDB0032045	95978	NA	NA	9949007	11504798	11419062	9327990	7611035	10557322	12258934	11924596	11121203	10087879	8976714	11839756	8963184	10683619	14898223	6.08635e+06	9378611	12510601	10533930	10980307	12879971	9452784	13969028	11505806	9738459	7.43292e+06	9378756	7251482	9339049	8226159	6.97687e+06	2.77864e+06	3.51156e+06	5.40678e+06	3.36879e+06	2.54327e+06	3.71239e+06	5.53706e+06	3.01635e+06	2.83467e+06	3.79552e+06	4814188	3.59266e+06	5.48434e+06
[truncated: 132 more rows]
[truncated: 29 more columns]
