# Supplementary material for: Integrated Metabolomics and Proteomics Dynamics of Serum Samples Reveals Dietary Zeolite Clinoptilolite Supplementation Restores Energy Balance in High Yielding Dairy Cows
Source: Metabolites. 2021 Dec 5;11(12):842. doi: 10.3390/metabo11120842 (PMC8705350; doi:10.3390/metabo11120842)
Supplement: Supplementary file 1 [file metabolites-11-00842-s001.zip › supplementary files/Supplementary Table S7.xlsx]

## Sheet: Sheet1
Supplementary Table S7. List of significant proteins quantified based on one-way ANOVA
Acc Id	gene	Protein	Peptide	30pre-C1	30pre-C2	30pre-C3	30pre-C4	30pre-C5	30pre-C6	30pre-C7	30pre-C8	median 30pp	10pre-C1	10pre-C2	10pre-C3	10pre-C4	10pre-C5	10pre-C6	10pre-C7	10pre-C8	median c 10	5post-C1	5post-C2	5post-C3	5post-C4	5post-C5	5post-C6	5post-C7	5post-C8	median c 5post	26post-C1	26post-C2	26post-C3	26post-C4	26post-C5	26post-C6	26post-C7	26post-C8	median 26post	30pre-S1	30pre-S2	30pre-S3	30pre-S4	30pre-S5	30pre-S6	30pre-S7	30pre-S8	median s30	10pre-S1
Q2UVX4	C3	Complement C3 OS=Bos taurus OX=9913 GN=C3 PE=1 SV=2	37	1.196	1.346	1.078	1.127	1.339	1.064	1.241	0.999	1.1615	1.137	1.274	1.117	1.436	0.933	0.9	1.533	0.83	1.127	1.184	1.176	0.927	1.32	1.032	1.054	1.132	1.031	1.093	1.074	1.306	1.077	1.182	1.094	1.033	1.151	1.047	1.0855	0.966	0.735	0.819	0.965	0.847	1.007	0.989	0.714	0.906	1.109
A0A0F6QNP7	C3	Complement component 3 OS=Bos taurus OX=9913 GN=C3 PE=2 SV=1	37	1.196	1.346	1.078	1.127	1.339	1.064	1.241	0.999	1.1615	1.137	1.274	1.117	1.436	0.933	0.9	1.533	0.83	1.127	1.184	1.176	0.927	1.32	1.032	1.054	1.132	1.031	1.093	1.074	1.306	1.077	1.182	1.094	1.033	1.151	1.047	1.0855	0.966	0.735	0.819	0.965	0.847	1.007	0.989	0.714	0.906	1.109
G3X7A5		Complement C3 OS=Bos taurus OX=9913 GN=C3 PE=4 SV=1	36	1.196	1.346	1.077	1.125	1.339	1.064	1.241	1.001	1.1605	1.134	1.274	1.117	1.436	0.934	0.9	1.533	0.83	1.1255	1.186	1.177	0.927	1.32	1.032	1.054	1.134	1.03	1.094	1.072	1.311	1.078	1.182	1.093	1.033	1.152	1.046	1.0855	0.966	0.733	0.819	0.965	0.847	1.007	0.991	0.714	0.906	1.109
E1BH06	C4A	Uncharacterized protein OS=Bos taurus OX=9913 GN=LOC617696 PE=1 SV=2	31	1.214	1.257	1.232	1.123	1.231	1.154	1.047	1.009	1.184	1.142	1.179	1.23	1.404	0.865	1.3	1.356	0.815	1.2045	1.196	1.003	1.026	1.277	1.102	1.044	1.166	1.131	1.1165	1.093	1.118	1.139	1.163	1.157	1.121	1.233	1.144	1.1415	0.995	0.739	0.997	0.886	0.91	1.005	1.16	0.745	0.9525	1.18
B8Y9S9		Embryo-specific fibronectin 1 transcript variant OS=Bos taurus OX=9913 GN=FN1 PE=2 SV=1	29	1.363	1.082	1.158	1.186	1.081	1.1	1.258	1.09	1.129	1.359	0.996	1.365	1.363	1.107	0.978	1.59	0.851	1.233	1.147	0.879	0.986	1.127	1.056	0.897	1.077	1.088	1.0665	1.221	1.24	0.968	1.067	1.13	1.029	1.199	1.048	1.0985	1.086	0.845	0.859	0.909	0.903	1.007	1.163	0.798	0.906	0.989
P07589	FN1	Fibronectin OS=Bos taurus OX=9913 GN=FN1 PE=1 SV=4	29	1.363	1.082	1.158	1.186	1.081	1.1	1.258	1.09	1.129	1.359	0.996	1.365	1.363	1.107	0.978	1.59	0.851	1.233	1.147	0.879	0.986	1.127	1.056	0.897	1.077	1.088	1.0665	1.221	1.24	0.968	1.067	1.13	1.029	1.199	1.048	1.0985	1.086	0.845	0.859	0.909	0.903	1.007	1.163	0.798	0.906	0.989
G5E5A9	FN1	Fibronectin OS=Bos taurus OX=9913 GN=FN1 PE=4 SV=1	29	1.363	1.082	1.158	1.186	1.081	1.1	1.258	1.09	1.129	1.359	0.996	1.365	1.363	1.107	0.978	1.59	0.851	1.233	1.147	0.879	0.986	1.127	1.056	0.897	1.077	1.088	1.0665	1.221	1.24	0.968	1.067	1.13	1.029	1.199	1.048	1.0985	1.086	0.845	0.859	0.909	0.903	1.007	1.163	0.798	0.906	0.989
B8Y9T0		Cumulus cell-specific fibronectin 1 transcript variant OS=Bos taurus OX=9913 GN=FN1 PE=2 SV=1	28	1.363	1.082	1.158	1.18	1.081	1.1	1.258	1.09	1.129	1.359	0.996	1.365	1.363	1.107	0.978	1.59	0.851	1.233	1.147	0.888	0.986	1.127	1.056	0.897	1.077	1.088	1.0665	1.221	1.24	0.968	1.067	1.13	1.029	1.199	1.048	1.0985	1.086	0.845	0.859	0.909	0.903	1.007	1.165	0.798	0.906	0.989
F1MY85	C5	Complement C5a anaphylatoxin OS=Bos taurus OX=9913 GN=C5 PE=1 SV=2	21	1.263	1.428	1.143	1.097	1.275	1.1	1.103	1.073	1.123	1.165	1.208	1.289	1.329	0.919	1.187	1.369	0.843	1.1975	1.292	1.099	0.944	1.182	1.192	1.271	1.154	1.058	1.168	1.215	1.507	1.055	1.158	1.098	1.1	1.09	1.11	1.105	1.05	0.727	0.834	0.906	0.83	1.067	1.053	0.822	0.87	1.25
A0A0F6QMJ3	C5	Complement component 5 OS=Bos taurus OX=9913 GN=C5 PE=2 SV=1	20	1.26	1.437	1.143	1.097	1.28	1.1	1.103	1.073	1.123	1.165	1.21	1.289	1.329	0.919	1.187	1.369	0.843	1.1985	1.292	1.099	0.939	1.182	1.18	1.27	1.154	1.058	1.167	1.215	1.507	1.055	1.158	1.098	1.1	1.09	1.11	1.105	1.046	0.727	0.834	0.906	0.83	1.067	1.053	0.822	0.87	1.241
Q28178	THBS1	Thrombospondin-1 OS=Bos taurus OX=9913 GN=THBS1 PE=2 SV=2	18	1.19	1.197	1.035	1.092	1.22	1.178	1.145	1.015	1.1615	1.25	1.245	1.159	1.384	0.766	1.376	1.328	0.995	1.2475	1.141	1.2	0.77	1.259	1.201	1.138	1.07	1.148	1.1445	1.094	1.488	1.188	1.12	1.161	1.122	1.117	1.158	1.14	0.999	0.939	0.752	0.983	0.979	0.907	1.037	0.79	0.959	1.378
F1N3A1	THBS1	Thrombospondin-1 OS=Bos taurus OX=9913 GN=THBS1 PE=4 SV=1	18	1.19	1.197	1.035	1.092	1.22	1.178	1.145	1.015	1.1615	1.25	1.245	1.159	1.384	0.766	1.376	1.328	0.995	1.2475	1.141	1.2	0.77	1.259	1.201	1.138	1.07	1.148	1.1445	1.094	1.488	1.188	1.12	1.161	1.122	1.117	1.158	1.14	0.999	0.939	0.752	0.983	0.979	0.907	1.037	0.79	0.959	1.378
Q2KJF1	A1BG	Alpha-1B-glycoprotein OS=Bos taurus OX=9913 GN=A1BG PE=1 SV=1	17	1.247	1.22	1.093	1.041	1.101	1.013	1.199	0.901	1.097	1.168	1.067	1.24	1.208	0.897	1.182	1.436	0.766	1.175	1.049	1.038	0.946	1.075	1.027	1.037	1.097	0.978	1.0375	1.194	1.059	1.066	1.062	1.01	1.016	1.12	1.01	1.0605	1.097	0.757	0.862	0.818	0.759	0.937	1.095	0.88	0.871	1.361
P00735	F2	Prothrombin OS=Bos taurus OX=9913 GN=F2 PE=1 SV=2	16	1.328	1.147	1.169	1.234	1.043	1.03	1.163	1.071	1.155	1.188	1.094	1.187	1.322	0.854	1.175	1.39	0.799	1.181	1.102	0.972	0.953	1.211	1.185	1.004	1.064	1.099	1.0815	1.265	1.346	1.008	1.076	1.073	0.996	1.118	1.149	1.097	1.09	0.692	0.95	0.899	0.797	0.936	1.083	0.789	0.9175	1.324
Q29443	TF	Serotransferrin OS=Bos taurus OX=9913 GN=TF PE=2 SV=1	13	1.345	1.026	1.36	1.226	1.168	1.014	1.025	1.098	1.133	0.975	0.877	1.211	1.575	0.949	0.846	1.367	0.784	0.962	1.021	0.981	0.845	1.275	1.053	1.041	1.076	1.103	1.047	1.025	1.333	0.943	1.271	0.903	1.016	1.287	1.113	1.069	1.029	0.756	0.871	0.822	0.863	0.928	0.961	0.769	0.867	0.926
P06868	PLG	Plasminogen OS=Bos taurus OX=9913 GN=PLG PE=1 SV=2	11	1.22	1.192	1.034	0.99	1.151	1.117	1.183	1.245	1.167	1.178	1.157	1.073	1.192	0.831	1.393	1.45	1.096	1.1675	1.071	1.012	0.906	1.048	1.194	1.033	1.079	1.352	1.0595	1.242	1.6	1.004	0.974	1.024	1.051	1.221	1.275	1.136	1.084	0.735	0.829	0.923	0.643	0.877	1.036	0.813	0.853	1.084
F1N076	CP	Ceruloplasmin OS=Bos taurus OX=9913 GN=CP PE=1 SV=2	10	1.241	1.499	0.991	0.932	1.19	1.155	1.269	1.087	1.1725	1.255	1.28	0.951	1.133	0.714	1.358	1.643	0.919	1.194	1.096	1.156	0.917	1.045	1.347	1.263	1.112	1.128	1.12	1.364	1.734	0.999	0.909	1.096	1.162	1.176	1.162	1.162	1.032	0.755	0.72	1.119	0.635	1.066	1.18	0.755	0.8935	1.209
Q28194		Thrombospondin-1 (Fragment) OS=Bos taurus OX=9913 PE=2 SV=1	9	1.215	1.174	1.025	1.131	1.214	1.187	1.167	1.086	1.1705	1.272	1.137	1.14	1.428	0.734	1.561	1.328	0.944	1.206	1.156	1.05	0.764	1.275	1.157	1.145	1.135	1.12	1.14	1.09	1.671	1.238	1.159	1.163	1.158	1.191	1.104	1.161	0.982	1.017	0.764	0.97	1.012	0.934	1.064	0.788	0.976	1.457
Q693V9		Complement component 3d (Fragment) OS=Bos taurus OX=9913 PE=2 SV=1	8	1.154	1.265	1.04	1.143	1.335	1.043	1.304	1.005	1.1485	1.127	1.273	1.099	1.464	0.963	0.884	1.535	0.809	1.113	1.227	1.205	0.906	1.418	1.035	1.067	1.136	1.06	1.1015	1.024	1.274	1.098	1.244	1.07	1.091	1.167	1.077	1.0945	0.979	0.736	0.832	0.914	0.906	1.025	0.979	0.73	0.91	1.135
Q29RQ1	C7	Complement component C7 OS=Bos taurus OX=9913 GN=C7 PE=2 SV=1	8	1.041	0.984	0.9	1.065	0.964	0.94	1.03	1.162	1.007	0.981	0.944	1.204	1.253	0.93	1.245	1.171	0.821	1.076	1.166	0.888	0.87	1.305	1.198	1.194	0.924	0.923	1.045	0.877	1.233	0.924	0.93	0.916	1.116	0.845	1.198	0.927	1.013	0.675	0.631	0.876	0.906	0.775	0.986	0.819	0.8475	1.122
A5D7R6	ITIH2	ITIH2 protein OS=Bos taurus OX=9913 GN=ITIH2 PE=2 SV=1	8	1.371	1.033	1.281	1.268	1.04	1.028	1.293	0.861	1.154	1.356	1.024	1.483	1.564	0.985	0.663	1.544	0.701	1.19	1.364	1.003	0.934	1.433	0.772	1.059	1.143	1.163	1.101	1.19	0.789	0.914	1.21	0.929	1.175	1.204	1.21	1.1825	1.05	0.852	0.946	0.838	0.943	1.054	1.131	0.814	0.9445	0.802
E1B805	LOC528040	Uncharacterized protein OS=Bos taurus OX=9913 GN=LOC528040 PE=4 SV=2	8	1.369	1.118	1.175	1.286	1.147	1.081	1.374	1.073	1.161	1.137	1.2	1.251	1.359	0.983	0.894	1.548	0.79	1.1685	1.061	1.115	0.929	1.239	1.072	1.15	1.19	1.076	1.0955	1.094	1.444	0.966	1.167	1.109	1.046	1.157	1.105	1.107	1.034	0.778	1.001	0.793	0.864	1.21	1.092	0.805	0.9325	1.251
Q0VCX1	C1S	Complement C1s subcomponent OS=Bos taurus OX=9913 GN=C1S PE=2 SV=2	7	1.334	0.901	1.173	1.167	0.801	1.046	1.055	0.981	1.0505	1.151	1.158	1.295	1.451	0.922	0.93	1.304	0.776	1.1545	1.147	1.142	1.044	1.221	1.349	1.22	1.164	0.999	1.1555	1.094	1.319	1.141	1.139	0.858	1.063	1.052	1.081	1.0875	1.047	0.791	0.743	0.799	0.997	0.754	1.081	0.772	0.795	1.095
F1MJ12	C1S	Complement C1s subcomponent OS=Bos taurus OX=9913 GN=C1S PE=3 SV=1	7	1.334	0.901	1.173	1.167	0.801	1.046	1.055	0.981	1.0505	1.151	1.158	1.295	1.451	0.922	0.93	1.304	0.776	1.1545	1.147	1.142	1.044	1.221	1.349	1.22	1.164	0.999	1.1555	1.094	1.319	1.141	1.139	0.858	1.063	1.052	1.081	1.0875	1.047	0.791	0.743	0.799	0.997	0.754	1.081	0.772	0.795	1.095
F1MX87	C8A	Complement C8 alpha chain OS=Bos taurus OX=9913 GN=C8A PE=4 SV=1	7	1.362	1.167	1.202	0.966	1.251	1.062	1.272	0.875	1.1845	1.309	1.07	1.239	1.383	0.919	1.232	1.587	0.831	1.2355	1.263	0.928	0.962	1.185	1.205	0.962	1.37	1.06	1.1225	1.214	1.091	1.09	1.107	1.039	1.136	1.094	1.028	1.0925	1.092	0.804	0.876	0.862	0.848	0.876	1.02	0.8	0.869	1.093
F1N045	C7	Complement component C7 OS=Bos taurus OX=9913 GN=C7 PE=4 SV=1	7	1.041	0.967	0.9	1.065	0.925	0.94	1.03	1.339	0.9985	0.981	0.944	1.204	1.253	0.93	1.245	1.171	0.821	1.076	1.226	0.888	0.87	1.305	1.198	1.194	0.924	0.923	1.059	0.877	1.245	0.924	0.93	0.916	1.116	0.845	1.198	0.927	1.013	0.675	0.631	0.876	0.906	0.775	0.986	0.819	0.8475	1.122
F1N4M7	CFI	Complement factor I OS=Bos taurus OX=9913 GN=CFI PE=1 SV=2	7	1.267	1.276	1.139	1.019	1.36	1.061	1.212	1.197	1.2045	1.217	1.053	1.169	1.375	0.972	1.177	1.469	0.878	1.173	1.082	0.94	0.958	1.145	1.307	1.126	1.081	1.172	1.104	0.973	1.291	1.041	1.088	1.09	1.067	1.154	1.126	1.089	1.094	0.763	0.777	0.871	0.898	0.893	0.983	0.847	0.882	1.062
Q32PI4	CFI	Complement factor I OS=Bos taurus OX=9913 GN=CFI PE=2 SV=1	7	1.267	1.276	1.139	1.019	1.36	1.061	1.212	1.197	1.2045	1.217	1.053	1.169	1.375	0.972	1.177	1.469	0.878	1.173	1.082	0.94	0.958	1.145	1.307	1.126	1.081	1.172	1.104	0.973	1.291	1.041	1.088	1.09	1.067	1.154	1.126	1.089	1.094	0.763	0.777	0.871	0.898	0.893	0.983	0.847	0.882	1.062
A5PJ69	SERPINA10	SERPINA10 protein OS=Bos taurus OX=9913 GN=SERPINA10 PE=2 SV=1	7	1.392	1.162	1.248	1.159	1.321	1.11	1.093	0.9	1.1605	1.259	1.148	1.774	1.413	1.094	1.204	1.313	0.862	1.2315	1.217	0.893	0.917	1.197	0.939	1.233	0.955	1.21	1.076	1.373	0.991	1.179	1.252	1.117	1	1.18	1.144	1.1615	1.033	0.851	1.013	0.905	0.839	0.922	1.223	0.765	0.9135	1.473
P28800	SERPINF2	Alpha-2-antiplasmin OS=Bos taurus OX=9913 GN=SERPINF2 PE=1 SV=2	6	1.271	1.009	1.058	1.026	0.952	1	1.219	1.081	1.042	1.233	1.115	1.189	1.272	0.912	1.173	1.511	0.829	1.181	1.031	0.774	0.809	1.125	1.085	1.036	1.04	1.191	1.038	1.156	1.226	1.043	0.951	0.957	1.154	1.11	1.234	1.132	1.05	0.722	0.845	0.846	0.762	0.926	0.966	0.841	0.8455	1.197
Q28107	F5	Coagulation factor V OS=Bos taurus OX=9913 GN=F5 PE=1 SV=1	6	1.159	1.122	1.098	1.149	1.284	0.885	1.246	0.89	1.1355	1.153	1.044	1.271	1.447	1.053	1.224	1.411	0.761	1.1885	1.159	0.912	0.953	1.219	1.246	1.012	1.311	1.188	1.1735	1.038	1.4	1.078	1.077	1.135	1.256	1.137	1.077	1.1065	1.216	0.871	0.999	0.87	0.928	0.899	1.006	0.82	0.9135	1.131
Q2KIH5	C8A	Complement component 8, alpha polypeptide OS=Bos taurus OX=9913 GN=C8A PE=2 SV=1	6	1.362	1.167	1.202	0.966	1.251	1.061	1.272	0.912	1.1845	1.309	1.07	1.239	1.383	0.919	1.232	1.587	0.845	1.2355	1.317	0.928	0.962	1.185	1.205	0.962	1.37	1.06	1.1225	1.214	1.164	1.09	1.107	1.039	1.136	1.094	1.028	1.1005	1.092	0.804	0.882	0.862	0.848	0.876	1.02	0.8	0.869	1.093
A5PJT7	ECM1	ECM1 protein OS=Bos taurus OX=9913 GN=ECM1 PE=2 SV=1	6	1.142	1.494	0.968	0.916	1.354	1.394	1.13	1.406	1.248	1.033	1.136	1.044	1.028	0.811	1.218	1.334	1.085	1.0645	0.825	1.018	0.947	1.028	1.31	1.077	0.925	1.031	1.023	1.112	2.115	1.114	0.892	1.075	0.873	1.05	1.099	1.087	0.959	0.643	0.722	1.079	0.681	0.953	1.014	0.788	0.8705	1.154
Q3T101	IGL@	IGL@ protein OS=Bos taurus OX=9913 GN=IGL@ PE=1 SV=1	6	1.105	0.967	1.286	0.956	1.208	1.165	1.203	1.421	1.184	1.201	0.813	1.296	1.086	0.794	1.319	1.577	1.154	1.1775	0.963	0.85	1.214	1.122	1.206	0.93	0.956	1.093	1.028	1.143	1.527	1.352	0.767	0.907	0.9	0.979	1.134	1.0565	1.017	0.568	1.099	1.092	0.624	0.839	1.164	0.697	0.928	0.896
P01044	KNG1	Kininogen-1 OS=Bos taurus OX=9913 GN=KNG1 PE=1 SV=1	6	1.553	1.323	1.223	0.973	0.867	0.936	1.248	0.993	1.108	1.355	1.194	1.431	1.223	1.036	0.819	1.529	0.81	1.2085	1.122	1.141	0.829	1.381	0.835	0.967	0.931	1.035	1.001	1.469	1.037	0.774	1.103	1.144	1.223	1.188	1.079	1.1235	1	1.067	1.128	0.749	0.84	0.976	0.881	0.762	0.9285	1.119
A0A140T8C8	KNG1	Kininogen-1 OS=Bos taurus OX=9913 GN=KNG1 PE=4 SV=1	6	1.553	1.323	1.223	0.973	0.867	0.936	1.248	0.993	1.108	1.355	1.194	1.431	1.223	1.036	0.819	1.529	0.81	1.2085	1.122	1.141	0.829	1.381	0.835	0.967	0.931	1.035	1.001	1.469	1.037	0.774	1.103	1.144	1.223	1.188	1.079	1.1235	1	1.067	1.128	0.749	0.84	0.976	0.881	0.762	0.9285	1.119
F1N102	C8B	Complement C8 beta chain OS=Bos taurus OX=9913 GN=C8B PE=4 SV=2	5	1.223	1.199	1.037	1.106	1.392	1.089	1.185	1.181	1.183	1.269	1.161	1.247	1.306	1.003	1.201	1.301	1.062	1.224	1.108	1.223	0.972	1.235	1.395	1.127	1.167	1.143	1.155	1.19	1.472	0.996	1.026	1.155	1.088	1.197	1.153	1.154	1.093	0.673	0.86	0.919	0.909	0.996	1.072	0.814	0.914	1.018
A5D9D2	C4BPA	Complement component 4 binding protein, alpha chain OS=Bos taurus OX=9913 GN=C4BPA PE=2 SV=1	5	1.259	1.264	1.071	1.164	1.296	1.147	1.248	0.867	1.206	1.212	1.182	0.975	1.428	1.17	1.482	1.544	0.733	1.197	1.285	1.139	0.851	1.16	1.145	1.004	1.253	1.065	1.142	1.15	1.201	0.863	1.157	1.192	0.946	1.296	1.18	1.1685	1.088	0.856	0.963	0.783	0.873	0.785	1.133	0.812	0.8645	1.139
P50448		Factor XIIa inhibitor OS=Bos taurus OX=9913 PE=1 SV=1	5	1.192	1.252	1.112	1.229	1.235	1.223	1.225	1.062	1.224	1.225	1.065	1.226	1.549	0.936	1.6	1.429	0.808	1.2255	1.102	0.976	0.839	1.343	1.237	0.985	1.197	1.103	1.1025	0.959	1.315	0.968	1.165	1.037	1.02	1.128	1.13	1.0825	1.128	0.844	0.87	0.871	0.832	0.91	0.995	0.797	0.8705	1.344
Q71U44		Fibronectin (Fragment) OS=Bos taurus OX=9913 PE=2 SV=1	5	1.276	1.112	1.161	1.181	0.964	1.096	1.175	1.188	1.168	1.414	1.027	1.466	1.428	1.078	0.917	1.505	0.858	1.246	1.266	0.847	1.061	1.178	1.267	0.949	1.07	1.087	1.0785	1.191	1.069	1.042	1.162	1.081	1.028	1.097	1.075	1.078	1.136	0.95	0.853	1.064	0.923	0.963	1.104	0.807	0.9565	1.116
G5E604	HFE	Ig-like domain-containing protein	5	1.629	1.031	0.864	1.509	0.912	0.729	1.213	0.933	0.982	1.523	0.818	0.708	1.544	0.705	1.269	1.406	0.646	1.0435	1.624	0.69	0.78	1.517	1.007	0.899	0.897	0.723	0.898	1.366	1.539	0.632	1.163	0.748	0.58	0.915	0.726	0.8315	1.681	1.262	0.525	0.699	0.504	0.441	1.533	1.194	0.9465	1.66
F1MNV5	KNG1	Kininogen-1 OS=Bos taurus OX=9913 GN=KNG1 PE=4 SV=2	5	1.553	1.323	1.229	0.968	0.867	0.93	1.249	0.997	1.113	1.356	1.194	1.431	1.215	1.024	0.819	1.526	0.801	1.2045	1.127	1.144	0.835	1.387	0.835	0.959	0.921	1.032	0.9955	1.487	1.038	0.772	1.099	1.118	1.233	1.188	1.083	1.1085	1	1.065	1.139	0.745	0.834	0.976	0.878	0.759	0.927	1.119
Q2KIF2	LRG1	Leucine-rich alpha-2-glycoprotein 1 OS=Bos taurus OX=9913 GN=LRG1 PE=1 SV=1	5	1.254	1.289	1.132	1.088	1.136	1.024	1.034	1.124	1.128	1.399	1.189	1.189	1.318	0.862	1.279	1.265	0.833	1.227	1.271	1.302	1.056	1.234	1.425	1.085	1.141	1.239	1.2365	1.359	1.659	1.061	1.308	1.036	1.088	1.156	1.241	1.1985	1.083	1.082	0.962	0.822	0.979	0.859	1.003	0.744	0.9705	1.267
Q28065	C4BPA	C4b-binding protein alpha chain OS=Bos taurus OX=9913 GN=C4BPA PE=2 SV=1	4	1.199	1.253	1.114	1.105	1.304	1.034	1.179	0.912	1.1465	1.078	1.171	0.996	1.368	1.211	1.409	1.512	0.743	1.191	1.23	1.065	0.942	1.16	1.127	1.12	1.118	1.014	1.119	1.107	1.284	1.087	1.047	1.15	0.946	1.244	1.041	1.097	1.08	0.747	0.938	0.796	0.873	0.857	1.076	0.812	0.865	1.251
O97941		Complement component 3 (Fragment) OS=Bos taurus OX=9913 PE=2 SV=1	4	1.178	1.361	1.052	1.103	1.364	1.031	1.171	0.979	1.137	1.089	1.236	1.175	1.389	0.94	0.907	1.502	0.774	1.132	1.086	1.144	0.936	1.375	1.045	1.031	1.091	0.997	1.0655	1.04	1.236	1.036	1.131	1.224	1.026	1.155	1.026	1.0855	1	0.698	0.872	0.956	0.847	0.977	0.964	0.783	0.914	1.105
A6QP30	CPN2	CPN2 protein OS=Bos taurus OX=9913 GN=CPN2 PE=2 SV=1	4	1.278	1.015	1.065	1.136	1.088	1.2	1.031	0.976	1.0765	1.207	1.124	1.103	1.395	0.998	1.365	1.301	0.851	1.1655	1.144	0.862	0.91	1.264	1.525	1.087	0.834	1.105	1.096	1.208	1.24	1.096	1.203	1.023	1.147	1.033	1.13	1.1385	1.04	1.077	0.845	0.981	0.851	0.965	1.072	0.642	0.973	1.478
E1BMJ0	SERPING1	Factor XIIa inhibitor precursor OS=Bos taurus OX=9913 GN=SERPING1 PE=3 SV=2	4	1.192	1.252	1.112	1.229	1.235	1.223	1.225	1.041	1.224	1.225	1.065	1.226	1.549	0.936	1.6	1.429	0.808	1.2255	1.092	0.976	0.839	1.343	1.237	0.985	1.197	1.103	1.0975	0.959	1.277	0.968	1.165	1.037	1.02	1.128	1.13	1.0825	1.128	0.844	0.87	0.871	0.832	0.91	0.995	0.797	0.8705	1.344
G3X6K8	HP	Haptoglobin OS=Bos taurus OX=9913 GN=HP PE=3 SV=1	4	0.992	0.504	0.102	0.168	1.704	1.517	0.107	2.28	0.748	0.687	0.722	0.777	0.121	0.081	3.923	0.115	2.022	0.7045	0.614	0.125	0.922	0.144	3.819	0.518	0.463	0.41	0.4905	0.101	2.642	2.628	0.429	0.967	0.094	0.425	0.427	0.428	0.764	0.435	0.492	0.097	0.083	0.546	0.158	0.086	0.2965	3.23
A0A0A0MPA0	LOC784932	SERPIN domain-containing protein protein OS=Bos taurus OX=9913 GN=LOC784932 PE=1 SV=1	4	0.471	0.636	1.627	1.484	0.683	1.85	0.556	0.605	0.6595	0.485	0.444	1.609	1.477	0.467	2.211	0.633	0.54	0.5865	0.474	0.381	1.967	1.379	0.617	0.474	0.368	1.411	0.5455	0.463	0.567	2.129	1.179	0.549	0.534	0.422	1.346	0.558	1.597	0.285	0.433	2.038	0.721	0.504	1.96	1.285	1.003	0.649
F1MJZ4	IGFALS	Uncharacterized protein OS=Bos taurus OX=9913 GN=IGFALS PE=4 SV=2	4	1.361	1.101	1.183	1.116	1.126	1.106	1.084	0.882	1.111	1.511	1.003	1.242	1.27	0.898	1.036	1.49	0.74	1.139	1.371	1.017	0.861	1.268	1.079	0.928	1.026	1.196	1.0525	1.161	1.261	1.084	1.214	1.09	0.917	1.283	1.11	1.1355	1.082	0.765	0.859	0.888	0.876	0.82	1.027	0.729	0.8675	0.858
F1MLW8	LOC100847119	Uncharacterized protein OS=Bos taurus OX=9913 PE=1 SV=2	4	1.066	1.096	1.219	0.916	1.542	1.136	0.863	1.794	1.116	0.996	1.187	1.29	1.26	0.767	1.206	0.781	1.239	1.1965	0.967	0.921	1.722	1.053	1.42	0.805	1.002	0.891	0.9845	1.069	1.772	0.833	0.866	1.381	1.011	0.935	1.378	1.04	1.261	0.388	0.756	1.179	0.652	0.916	0.869	1.123	0.8925	0.809
P34955	SERPINA1	Alpha-1-antiproteinase OS=Bos taurus OX=9913 GN=SERPINA1 PE=1 SV=1	3	1.322	1.067	1.156	1.112	0.923	1.034	1.098	0.94	1.0825	1.232	1.019	1.293	1.412	0.878	0.976	1.367	0.683	1.1255	1.168	0.867	0.927	1.36	1.049	0.998	1.111	1.141	1.08	1.133	0.997	0.928	1.243	0.887	1.11	1.151	1.029	1.0695	1.068	0.72	0.866	0.861	0.855	0.826	1.068	0.872	0.8635	1.101
A8YXZ2	C8G	C8G protein OS=Bos taurus OX=9913 GN=C8G PE=2 SV=1	3	1.268	1.087	1.136	1.145	0.956	0.919	1.251	1.03	1.1115	1.195	1.074	1.257	1.352	0.947	1.116	1.405	0.607	1.1555	1.312	0.984	0.908	1.261	1.063	1.008	1.192	1.146	1.1045	1.259	1.046	0.942	1.05	1.037	1.129	1.133	1.145	1.0895	1.033	0.71	1.156	0.888	0.91	1.039	1.006	0.808	0.958	1.146
F1MX86		Complement C8 beta chain OS=Bos taurus OX=9913 GN=C8B PE=4 SV=2	3	1.217	1.232	1.103	1.15	1.446	1.08	1.219	1.127	1.1835	1.295	1.242	1.243	1.336	1.048	1.244	1.364	1.034	1.2435	1.079	1.432	0.983	1.239	1.471	1.14	1.201	1.154	1.1775	1.346	1.684	0.972	1.016	1.295	1.063	1.267	1.175	1.221	1.139	0.667	0.876	0.913	0.934	1.017	1.089	0.824	0.9235	0.998
Q2KIK9	C8B	Complement component 8, beta polypeptide OS=Bos taurus OX=9913 GN=C8B PE=2 SV=1	3	1.217	1.232	1.103	1.15	1.446	1.08	1.219	1.127	1.1835	1.295	1.242	1.243	1.336	1.048	1.244	1.364	1.034	1.2435	1.079	1.432	0.983	1.239	1.471	1.14	1.201	1.154	1.1775	1.346	1.684	0.972	1.016	1.295	1.063	1.267	1.175	1.221	1.139	0.667	0.876	0.913	0.934	1.017	1.089	0.824	0.9235	0.998
G3N2D7		Uncharacterized protein OS=Bos taurus OX=9913 GN=LOC100297192 PE=4 SV=1	3	1.54	0.973	1.374	1.096	0.999	1.383	1.415	0.898	1.235	1.584	0.928	1.441	1.424	0.815	1.273	1.665	1.077	1.3485	1.236	0.987	1.144	1.289	0.998	1.15	1.071	0.999	1.1075	1.379	1.15	1.322	0.953	0.949	1.026	1.152	1.063	1.1065	1.058	0.803	1.114	1.065	0.933	1.084	0.99	0.73	1.024	1.191
G3N0S9		Uncharacterized protein OS=Bos taurus OX=9913 GN=LOC515150 PE=4 SV=1	3	1.212	1.089	0.775	1.06	1.207	1.054	1.278	0.871	1.0745	1.126	1.416	0.946	1.532	1.186	1.67	1.466	0.77	1.301	1.144	1.031	0.952	1.281	1.223	1.096	1.198	1.007	1.12	1.085	1.566	1.79	1.116	1.266	0.704	1.178	0.994	1.147	1.085	0.864	0.777	0.589	0.759	0.699	0.977	0.847	0.812	1.068
F1MP09		Uncharacterized protein OS=Bos taurus OX=9913 PE=4 SV=2	3	1.188	1.155	1.252	1.1	1.208	1.208	0.946	1.044	1.1715	1.257	1.198	1.095	1.266	0.961	1.6	1.151	0.898	1.1745	0.915	0.866	0.949	1.157	1.074	1.221	1.074	1.128	1.074	1.02	0.986	0.943	0.943	1.085	1.033	1.13	1.193	1.0265	0.995	0.9	1.022	0.759	0.869	0.758	1.117	0.753	0.8845	1.125
Q3KUS7	BF	Complement factor B (Fragment) OS=Bos taurus OX=9913 GN=BF PE=4 SV=1	2	1.364	1.026	1.297	0.926	1.13	1.063	1.089	1.142	1.1095	1.277	0.937	1.265	1.173	1.052	1.022	1.444	0.827	1.1125	1.219	0.913	0.931	1.216	0.905	1.063	1.181	1.05	1.0565	1.264	1.069	0.998	1.029	0.911	1.081	1.101	1.161	1.075	1.038	0.729	0.977	0.803	0.865	0.73	1.3	0.736	0.834	1.009
P17690	APOH	Beta-2-glycoprotein 1 OS=Bos taurus OX=9913 GN=APOH PE=1 SV=4	2	1.39	1.037	1.191	1.349	1.077	0.964	1.101	0.765	1.089	1.292	1.004	1.298	1.41	1.063	1.009	1.512	0.671	1.1775	1.607	1.06	1.192	1.365	1.092	1.229	1.08	1.061	1.142	1.375	0.875	0.91	1.285	0.993	0.98	1.226	1.174	1.0835	0.983	0.938	0.918	0.783	0.946	0.933	1.133	0.769	0.9355	1.299
A0A140T843	APOH	Beta-2-glycoprotein 1 OS=Bos taurus OX=9913 GN=APOH PE=4 SV=1	2	1.39	1.037	1.191	1.349	1.077	0.964	1.101	0.765	1.089	1.292	1.004	1.298	1.41	1.063	1.009	1.512	0.671	1.1775	1.607	1.06	1.192	1.365	1.092	1.229	1.08	1.061	1.142	1.375	0.875	0.91	1.285	0.993	0.98	1.226	1.174	1.0835	0.983	0.938	0.918	0.783	0.946	0.933	1.133	0.769	0.9355	1.299
Q0P5J4	KRT25	Keratin, type I cytoskeletal 25 OS=Bos taurus OX=9913 GN=KRT25 PE=2 SV=1	1	1.346	2.274			1.272		1.029	0.855	1.272		0.918		1.187	4.715				1.187	1.072				1.234				1.153		0.876							0.876	1.151								1.151	1.832
G5E5V1		Uncharacterized protein OS=Bos taurus OX=9913 PE=4 SV=1	1	1.105	0.967	1.286	0.956	1.208	1.165	1.203	1.421	1.184	1.201	0.813	1.296	1.086	0.794	1.319	1.577	1.154	1.1775	0.963	0.85	1.214	1.122	1.206	0.93	0.956	1.093	1.028	1.143	1.527	1.352	0.767	0.907	0.9	0.979	1.134	1.0565	1.017	0.568	1.099	1.092	0.624	0.839	1.164	0.697	0.928	0.896
[truncated: 35 more columns]
